# Supplementary material for: Transcriptomic profiles of non-embryogenic and embryogenic callus cells in a highly regenerative upland cotton line (Gossypium hirsutum L.)
Source: BMC Dev Biol. 2020 Dec 2;20:25. doi: 10.1186/s12861-020-00230-4 (PMC7713314; doi:10.1186/s12861-020-00230-4)
Supplement: Supplementary file 1 — Additional file 1. Differential gene expression profiles of NEC vs. EC in Jin668. Differentially expressed genes with functional annotations. The logFC value is the observed result in EC. [file 12861_2020_230_MOESM1_ESM.xlsx]

## Sheet: Sheet1
Table S1. Differential gene expression profiles of NEC vs. EC in Jin668. Differentially expressed genes with functional annotations. The logFC value is the observed result in EC.
Differential Expression						Functional Annotation (Phytozome)
Gene	Control	Observed Effect	logFC	PValue	FDR	PFAM	KOG	EC	SIGNALP	KO	GO	KEGG	Athaliana_BestHit	Athaliana_Defline	Ghirsutum_Defline	Functional Domains (descriptions)	Functional Domains (domain name)
Gohir.D11G247300.1	NEC	EC	12.218	2.63896e-60	2.43914e-56	0	0	0	SignalP-noTM	0	0	0	NA	NA	0	Nodulin_late	Nodulin_late
Gohir.A09G068700.1	NEC	EC	11.0312	2.25844e-16	1.40879e-14	0	0	0	0	0	0	0	NA	NA	NA	DUF3963	DUF3963
Gohir.A03G181200.1	NEC	EC	10.8542	5.80143e-67	1.34054e-62	0	0	0	0	0	0	0	AT3G19660	0	0	#N/A	#N/A
Gohir.A05G291150.1	NEC	EC	10.7942	2.50476e-24	5.12191e-22	0	0	0	0	0	0	0	NA	NA	NA	DUF4912	DUF4912
Gohir.A09G187300.1	NEC	EC	10.6509	1.65976e-19	1.71982e-17	0	0	0	0	0	0	0	NA	NA	0	#N/A	#N/A
Gohir.A11G045350.1	NEC	EC	10.6244	0.00116229	0.00472295	0	0	0	0	0	0	0	NA	NA	NA	#N/A	#N/A
Gohir.D12G136400.1	NEC	EC	10.6015	6.50175e-05	0.0003752	0	0	0	0	0	0	0	NA	NA	0	#N/A	#N/A
Gohir.A08G165050.1	NEC	EC	10.5716	1.71275e-34	1.16401e-31	0	0	0	0	0	0	0	NA	NA	NA	#N/A	#N/A
Gohir.A07G162000.3	NEC	EC	10.4885	1.52149e-25	3.68137e-23	0	0	0	0	0	0	0	NA	NA	0	#N/A	#N/A
Gohir.D11G067750.1	NEC	EC	10.3328	7.12067e-05	0.000406767	0	0	0	SignalP-noTM	0	0	0	NA	NA	NA	#N/A	#N/A
Gohir.A05G370200.2	NEC	EC	10.3026	1.89861e-11	4.83163e-10	0	0	0	0	0	0	0	NA	NA	0	#N/A	#N/A
Gohir.A06G023466.1	NEC	EC	10.02	7.70869e-19	7.13927e-17	0	0	0	0	0	0	0	NA	NA	NA	#N/A	#N/A
Gohir.D03G023232.1	NEC	EC	10.0007	0.00293528	0.0105158	PF10237	0	0	0	0	GO:0008168	0	AT3G58470	N2, N2-dimethylguanosine tRNA methyltransferase, putative, expressed; nucleic acid binding;methyltransferases	nucleic acid binding;methyltransferases	N6-adenineMlase	N6-adenineMlase
Gohir.D03G098901.1	NEC	EC	9.95081	9.02902e-33	4.58535e-30	0	0	0	SignalP-noTM	0	0	0	NA	NA	0	#N/A	#N/A
Gohir.D10G050300.1	NEC	EC	9.87986	0.00109573	0.00448838	PF08137	0	0	0	0	0	0	AT3G14362	expressed protein; ROTUNDIFOLIA like 10	ROTUNDIFOLIA like 9	DVL	DVL
Gohir.A06G051201.1	NEC	EC	9.86667	1.6012e-33	9.36683e-31	0	0	0	0	0	0	0	NA	NA	NA	#N/A	#N/A
Gohir.A07G119800.1	NEC	EC	9.83487	0.00149302	0.00586871	0	0	0	0	0	0	0	NA	NA	0	#N/A	#N/A
Gohir.D13G154766.1	NEC	EC	9.78627	0.00191952	0.00729692	0	0	0	0	0	0	0	AT5G47690	expressed protein; binding	binding	#N/A	#N/A
Gohir.A02G066401.1	NEC	EC	9.73762	4.38868e-09	6.7719e-08	0	0	0	0	0	0	0	NA	NA	0	#N/A	#N/A
Gohir.D04G112833.1	NEC	EC	9.6529	0.000121878	0.00065323	0	0	0	0	0	0	0	NA	NA	Ypt/Rab-GAP domain of gyp1p superfamily protein	#N/A	#N/A
Gohir.A11G009050.1	NEC	EC	9.63438	0.00119167	0.00482749	0	0	0	SignalP-noTM	0	0	0	NA	NA	NA	MPS-4	MPS-4
Gohir.D05G210050.1	NEC	EC	9.53848	0.0033924	0.0118878	0	0	0	SignalP-TM	0	0	0	NA	NA	NA	#N/A	#N/A
Gohir.A04G010100.1	NEC	EC	9.5298	0.000113027	0.000612501	0	0	0	0	0	0	0	AT3G11591	expressed protein	0	YrhK	YrhK
Gohir.D04G162700.1	NEC	EC	9.39327	0.00134983	0.00538231	0	0	0	0	0	0	0	NA	NA	0	#N/A	#N/A
Gohir.D05G078500.1	NEC	EC	9.38923	0.00147883	0.0058241	0	0	0	0	0	0	0	NA	NA	0	C1_1, zf-ribbon_3	C1_1, zf-ribbon_3
Gohir.D06G068500.1	NEC	EC	9.38923	0.00147883	0.0058241	PF06376	0	0	SignalP-TM	0	0	0	AT5G24105	expressed protein; arabinogalactan protein 41	arabinogalactan protein 20	AGP, DUF4220	AGP, DUF4220
Gohir.D09G250166.1	NEC	EC	9.38695	1.18256e-23	2.18603e-21	0	0	0	0	0	0	0	NA	NA	0	YdaT_toxin	YdaT_toxin
Gohir.D08G250250.1	NEC	EC	9.37335	0.00136569	0.00543861	0	0	0	0	0	0	0	AT5G16940	proline-rich protein 6, putative, expressed; carbon-sulfur lyases	carbon-sulfur lyases	GFA, Ribosomal_L37e	GFA, Ribosomal_L37e
Gohir.D11G223400.1	NEC	EC	9.35451	0.000126705	0.00067647	PF06825	0	0	0	0	GO:0003714	0	AT4G15802	heat shock factor-binding protein 1, putative, expressed; heat shock factor binding protein	heat shock factor binding protein	HSBP1, BLOC1_2, Hema_stalk, YvrJ	HSBP1, BLOC1_2, Hema_stalk, YvrJ
Gohir.A10G117532.1	NEC	EC	9.35336	0.00210779	0.00790854	0	0	0	0	0	0	0	NA	NA	Small nuclear ribonucleoprotein family protein	#N/A	#N/A
Gohir.D06G153925.1	NEC	EC	9.33303	0.000118427	0.00063743	0	0	0	0	0	0	0	NA	NA	NA	GAPES2	GAPES2
Gohir.D10G199350.1	NEC	EC	9.33303	0.000118427	0.00063743	0	0	0	0	0	0	0	NA	NA	NA	#N/A	#N/A
Gohir.D01G117000.1	NEC	EC	9.25698	4.82077e-15	2.39299e-13	0	0	0	SignalP-TM	0	0	0	ATMG00180	cytochrome C biogenesis 452	cytochrome C biogenesis 452	CcmF_C	CcmF_C
Gohir.A07G187732.1	NEC	EC	9.21221	0.000218283	0.00109246	0	0	0	0	0	0	0	NA	NA	0	#N/A	#N/A
Gohir.D04G167100.1	NEC	EC	9.20246	9.75755e-25	2.14731e-22	PF00249	0	0	SignalP-noTM	0	0	0	AT4G39250	MYB family transcription factor, putative, expressed; RAD-like 1	RAD-like 6	Myb_DNA-binding, Myb_DNA-bind_6	Myb_DNA-binding, Myb_DNA-bind_6
Gohir.D11G074000.1	NEC	EC	9.17005	1.02191e-13	3.99887e-12	0	0	0	SignalP-noTM	0	0	0	NA	NA	0	#N/A	#N/A
Gohir.D02G124850.1	NEC	EC	9.14984	0.00013463	0.000713016	0	0	4.2.1.9	0	0	0	0	NA	NA	dehydratase family	#N/A	#N/A
Gohir.A10G043150.1	NEC	EC	8.99637	1.61061e-13	6.09763e-12	0	0	0	SignalP-noTM	0	0	0	NA	NA	NA	#N/A	#N/A
Gohir.D10G142900.1	NEC	EC	8.90193	4.35641e-11	1.03351e-09	0	0	0	0	0	0	0	NA	NA	0	#N/A	#N/A
Gohir.D05G183866.1	NEC	EC	8.83461	3.9198e-10	7.64345e-09	0	0	0	0	0	0	0	NA	NA	NA	#N/A	#N/A
Gohir.A10G232150.1	NEC	EC	8.82773	0.000176189	0.000903005	0	0	0	0	0	0	0	NA	NA	NA	#N/A	#N/A
Gohir.A12G052750.1	NEC	EC	8.81551	0.000184233	0.000939024	0	0	0	0	0	0	0	NA	NA	NA	#N/A	#N/A
Gohir.A05G100200.1	NEC	EC	8.68449	2.04763e-11	5.17099e-10	0	0	0	0	0	0	0	NA	NA	0	#N/A	#N/A
Gohir.D07G000522.1	NEC	EC	8.68433	0.00190316	0.00724574	0	0	6.2.1.20	0	0	0	0	NA	NA	AMP-dependent synthetase and ligase family protein	#N/A	#N/A
Gohir.D12G071001.1	NEC	EC	8.68433	0.00190316	0.00724574	PF00179	0	6.3.2.19	0	0	0	0	NA	NA	NA	UQ_con	UQ_con
Gohir.D06G144201.1	NEC	EC	8.61111	2.97746e-20	3.34794e-18	0	0	0	0	0	0	0	NA	NA	NA	#N/A	#N/A
Gohir.A12G055750.1	NEC	EC	8.59983	0.00282062	0.0101639	0	0	0	0	0	0	0	NA	NA	NA	#N/A	#N/A
Gohir.A09G059050.1	NEC	EC	8.55344	6.17502e-24	1.19904e-21	PF04142	0	0	0	0	GO:0008643,GO:0016021,GO:0000139,GO:0005351	0	AT4G35335	UAA transporter family domain containing protein, expressed; Nucleotide-sugar transporter family protein	Nucleotide-sugar transporter family protein	Nuc_sug_transp, BaxI_1, DUF2417	Nuc_sug_transp, BaxI_1, DUF2417
Gohir.A03G146800.1	NEC	EC	8.52033	1.12884e-12	3.6228e-11	0	0	0	SignalP-noTM	0	0	0	NA	NA	CLAVATA3/ESR-RELATED 27	#N/A	#N/A
Gohir.D06G134101.1	NEC	EC	8.50592	2.5846e-10	5.22049e-09	0	0	0	0	0	0	0	NA	NA	NA	DUF515	DUF515
Gohir.D13G064100.1	NEC	EC	8.49972	2.05336e-12	6.27605e-11	PF00582	0	0	0	0	GO:0006950	0	AT1G11360	universal stress protein domain containing protein, putative, expressed; Adenine nucleotide alpha hydrolases-like superfamily protein	Adenine nucleotide alpha hydrolases-like superfamily protein	Usp	Usp
Gohir.A07G129550.1	NEC	EC	8.36812	0.0024473	0.00899971	0	0	0	0	0	0	0	NA	NA	NA	Poxvirus_B22R_N	Poxvirus_B22R_N
Gohir.D05G177000.1	NEC	EC	8.3169	1.132e-19	1.19439e-17	PF13920	KOG4172	0	0	0	0	0	AT4G03965	zinc finger, C3HC4 type family protein, expressed; RING/U-box superfamily protein	RING/U-box superfamily protein	zf-C3HC4_3, zf-C3HC4_2, Prok-RING_4, zf-C3HC4, zf-RING_2, zf-RING_UBOX, zf-RING_5, zf-C3HC4_4, zf-RING_4, zf-rbx1	zf-C3HC4_3, zf-C3HC4_2, Prok-RING_4, zf-C3HC4, zf-RING_2, zf-RING_UBOX, zf-RING_5, zf-C3HC
Gohir.D01G116666.1	NEC	EC	8.30989	0.000373301	0.00174507	PF05405	0	0	0	0	GO:0015078,GO:0015986,GO:0000276	0	ATMG00640	ATP synthase protein MI25, putative, expressed; hydrogen ion transporting ATP synthases, rotational mechanism;zinc ion binding	NA	Mt_ATP-synt_B	Mt_ATP-synt_B
Gohir.D11G214500.1	NEC	EC	8.30989	0.000373301	0.00174507	PF12734	0	0	0	0	0	0	NA	NA	0	CYSTM	CYSTM
Gohir.D02G109100.1	NEC	EC	8.30579	0.00258195	0.00942811	0	0	0	SignalP-noTM	0	0	0	NA	NA	0	GPR15L	GPR15L
Gohir.D13G021800.1	NEC	EC	8.2817	9.07982e-11	2.02224e-09	0	0	0	0	0	0	0	AT3G55020	TBC domain containing protein, expressed; Ypt/Rab-GAP domain of gyp1p superfamily protein	Ypt/Rab-GAP domain of gyp1p superfamily protein	#N/A	#N/A
Gohir.A12G061600.2	NEC	EC	8.26055	0.00254034	0.00929601	0	0	0	0	0	0	0	NA	NA	0	#N/A	#N/A
Gohir.A03G175650.1	NEC	EC	8.25921	4.71524e-14	1.95435e-12	0	0	0	SignalP-noTM	0	0	0	NA	NA	NA	#N/A	#N/A
Gohir.D02G236100.1	NEC	EC	8.21655	2.35899e-12	7.15345e-11	0	0	0	0	0	0	0	NA	NA	0	B3, MazE_antitoxin, DNA_ligase_OB	B3, MazE_antitoxin, DNA_ligase_OB
Gohir.D03G022151.1	NEC	EC	8.20728	3.36844e-10	6.65252e-09	PF01918	0	0	0	0	GO:0003676	0	AT1G76010	protein of unknown function domain containing protein, expressed; Alba DNA/RNA-binding protein	Alba DNA/RNA-binding protein	Alba	Alba
Gohir.D02G146500.2	NEC	EC	8.19836	0.00274491	0.00993263	0	0	0	0	0	0	0	NA	NA	0	#N/A	#N/A
Gohir.A03G000003.1	NEC	EC	8.1464	0.000441486	0.0020257	0	0	0	0	0	0	0	NA	NA	0	#N/A	#N/A
Gohir.D05G260150.1	NEC	EC	8.13004	1.04111e-07	1.18618e-06	PF00537	0	0	SignalP-noTM	0	GO:0008200,GO:0005576	0	NA	NA	Arabidopsis defensin-like protein	Toxin_3, Gamma-thionin, SLR1-BP	Toxin_3, Gamma-thionin, SLR1-BP
Gohir.D08G106300.3	NEC	EC	8.05049	0.00305008	0.0108696	0	0	0	0	0	0	0	NA	NA	AGAMOUS-like 20	#N/A	#N/A
Gohir.A01G157400.1	NEC	EC	8.04465	0.00356921	0.0124077	0	0	0	SignalP-noTM	0	0	0	NA	NA	NA	#N/A	#N/A
Gohir.A07G104400.1	NEC	EC	8.0407	4.95684e-06	3.80903e-05	PF00403	KOG1603	0	0	0	GO:0046872,GO:0030001	0	AT1G06330	heavy metal-associated domain containing protein, expressed; Heavy metal transport/detoxification superfamily protein	Heavy metal transport/detoxification superfamily protein	HMA, Peptidase_M16_C, BON	HMA, Peptidase_M16_C, BON
Gohir.D06G220400.1	NEC	EC	8.03259	0.00364244	0.0126167	0	0	0	0	0	0	0	NA	NA	NA	#N/A	#N/A
Gohir.D12G154600.1	NEC	EC	8.03196	1.15716e-07	1.30689e-06	0	0	0	0	0	GO:0048731	0	NA	NA	CLAVATA3/ESR-RELATED 17	#N/A	#N/A
Gohir.D06G129150.1	NEC	EC	8.01167	1.97721e-12	6.07141e-11	0	0	0	0	0	0	0	NA	NA	NA	#N/A	#N/A
Gohir.A02G009116.1	NEC	EC	8.01114	3.83249e-07	3.85604e-06	0	0	0	0	0	0	0	NA	NA	NA	SR-25, YL1, IMUP, BUD22, CCDC106	SR-25, YL1, IMUP, BUD22, CCDC106
Gohir.A08G110300.1	NEC	EC	8.00862	0.00302052	0.0107825	0	0	0	SignalP-noTM	0	0	0	NA	NA	0	#N/A	#N/A
Gohir.D10G088300.1	NEC	EC	7.96314	1.24116e-09	2.15428e-08	0	0	0	SignalP-noTM	0	0	0	NA	NA	0	#N/A	#N/A
Gohir.D06G180150.1	NEC	EC	7.95522	4.69325e-11	1.10435e-09	PF00079	0	0	0	0	GO:0005615	0	AT1G47710	serpin domain containing protein, putative, expressed; Serine protease inhibitor (SERPIN) family protein	Serine protease inhibitor (SERPIN) family protein	Serpin, Siah-Interact_N	Serpin, Siah-Interact_N
Gohir.A01G183400.1	NEC	EC	7.9446	2.71761e-13	9.88131e-12	0	0	0	0	K07374	GO:0005874,GO:0007017	0	AT1G64740	tubulin/FtsZ domain containing protein, putative, expressed; alpha-1 tubulin	tubulin alpha-5	#N/A	#N/A
Gohir.A12G100300.1	NEC	EC	7.94393	4.13963e-12	1.19943e-10	PF00903	KOG2944	4.4.1.5	0	0	0	0	AT2G28420	glyoxalase family protein, putative, expressed; Lactoylglutathione lyase / glyoxalase I family protein	Lactoylglutathione lyase / glyoxalase I family protein	Glyoxalase, Glyoxalase_2, Glyoxalase_4, Glyoxalase_6	Glyoxalase, Glyoxalase_2, Glyoxalase_4, Glyoxalase_6
Gohir.A03G014000.1	NEC	EC	7.92721	1.82512e-17	1.35823e-15	PF14368	0	0	SignalP-noTM	0	0	0	NA	NA	Bifunctional inhibitor/lipid-transfer protein/seed storage 2S albumin superfamily protein	LTP_2, Tryp_alpha_amyl	LTP_2, Tryp_alpha_amyl
Gohir.D02G177660.1	NEC	EC	7.90119	0.0032866	0.0115715	0	0	0	0	0	0	0	NA	NA	NA	DUF1871, DUF2378, Feld-I_B	DUF1871, DUF2378, Feld-I_B
Gohir.D03G114000.1	NEC	EC	7.9003	0.0032083	0.0113398	PF11820	0	0	0	0	0	0	AT5G63500	expressed protein; Protein of unknown function (DUF 3339)	Protein of unknown function (DUF 3339)	DUF3339	DUF3339
Gohir.A07G184600.1	NEC	EC	7.89901	1.18733e-14	5.53136e-13	0	0	3.6.4.11	0	K11647	0	0	AT2G28290	expressed protein; P-loop containing nucleoside triphosphate hydrolases superfamily protein	P-loop containing nucleoside triphosphate hydrolases superfamily protein	VWA_2, Flu_NS2, DUF2452	VWA_2, Flu_NS2, DUF2452
Gohir.A10G184900.2	NEC	EC	7.8785	6.66488e-11	1.52104e-09	PF11976	KOG1769	0	0	0	0	0	NA	NA	0	Rad60-SLD	Rad60-SLD
Gohir.D09G132401.1	NEC	EC	7.8757	0.000613103	0.00270517	0	0	2.7.11.1	0	0	0	0	NA	NA	NA	Pkinase, Pkinase_Tyr	Pkinase, Pkinase_Tyr
Gohir.A04G127300.2	NEC	EC	7.84182	1.21865e-10	2.64655e-09	0	0	0	0	0	0	0	NA	NA	0	DUF2478, tRNA-synt_1f, DUF3381	DUF2478, tRNA-synt_1f, DUF3381
Gohir.D11G220000.1	NEC	EC	7.81725	9.88529e-07	9.0124e-06	PF17181	0	0	SignalP-noTM	0	0	0	AT5G10310	expressed protein	0	EPF	EPF
Gohir.D07G139975.1	NEC	EC	7.80838	2.03395e-06	1.72535e-05	0	0	0	0	0	0	0	NA	NA	0	zf-MYST	zf-MYST
Gohir.D12G019100.1	NEC	EC	7.80762	7.41213e-12	2.04138e-10	PF06404	0	0	SignalP-noTM	0	GO:0005576,GO:0008283,GO:0008083	0	NA	NA	phytosulfokine 5 precursor	PSK	PSK
Gohir.D09G175650.1	NEC	EC	7.78374	0.00350218	0.0122169	0	0	0	0	0	0	0	NA	NA	NA	F-box-like, F-box	F-box-like, F-box
Gohir.A13G229700.1	NEC	EC	7.78317	0.00342819	0.0119962	0	0	0	0	0	0	0	NA	NA	0	#N/A	#N/A
Gohir.A03G125100.1	NEC	EC	7.767	0.000667986	0.00290955	PF11820	0	0	0	0	0	0	AT3G48660	expressed protein; Protein of unknown function (DUF 3339)	Protein of unknown function (DUF 3339)	DUF3339	DUF3339
Gohir.D04G118400.1	NEC	EC	7.74958	1.15949e-09	2.02895e-08	PF09713	0	3.4.17.23	0	0	0	0	AT5G02580	plant-specific domain TIGR01589 family protein, expressed; Plant protein 1589 of unknown function	Plant protein 1589 of unknown function	A_thal_3526	A_thal_3526
Gohir.A07G165178.1	NEC	EC	7.7279	0.00495924	0.0163705	0	0	0	0	0	GO:0005524	0	AT5G56500	T-complex protein, putative, expressed; TCP-1/cpn60 chaperonin family protein	TCP-1/cpn60 chaperonin family protein	#N/A	#N/A
Gohir.D02G239250.1	NEC	EC	7.70519	2.63216e-09	4.26471e-08	PF03140	0	0	0	0	0	0	NA	NA	Plant protein of unknown function (DUF247)	DUF247	DUF247
Gohir.A04G133050.1	NEC	EC	7.66972	3.135e-08	4.01443e-07	0	0	0	0	0	0	0	AT1G78560	bile acid sodium symporter family protein, putative, expressed; Sodium Bile acid symporter family	Sodium Bile acid symporter family	AHSP	AHSP
Gohir.A03G053100.1	NEC	EC	7.65985	0.000757216	0.00324559	PF11820	0	0	0	0	0	0	AT5G63500	expressed protein; Protein of unknown function (DUF 3339)	Protein of unknown function (DUF 3339)	DUF3339	DUF3339
Gohir.D08G178533.1	NEC	EC	7.65092	0.00377414	0.0129988	0	0	0	0	0	0	0	NA	NA	NA	mRNA_decap_C	mRNA_decap_C
Gohir.A13G096500.1	NEC	EC	7.61459	3.13908e-07	3.21733e-06	PF09713	0	3.4.17.23	0	0	0	0	AT5G02580	plant-specific domain TIGR01589 family protein, expressed; Plant protein 1589 of unknown function	Plant protein 1589 of unknown function	A_thal_3526, DUF1198	A_thal_3526, DUF1198
Gohir.A07G079700.1	NEC	EC	7.60912	5.25004e-08	6.39329e-07	PF05498	0	0	0	0	0	0	NA	NA	ralf-like 27	RALF, DUF4899	RALF, DUF4899
Gohir.1Z049609.1	NEC	EC	7.59365	2.72487e-06	2.23592e-05	PF00808	KOG1657	0	0	0	0	0	AT3G48590	core histone H2A/H2B/H3/H4, putative, expressed; nuclear factor Y, subunit C1	nuclear factor Y, subunit C1	#N/A	#N/A
Gohir.D10G250250.1	NEC	EC	7.58912	2.68337e-11	6.63506e-10	PF00223	0	1.97.1.12	0	0	GO:0016021,GO:0009579,GO:0009522,GO:0015979	0	ATCG00350	photosystem I P700 chlorophyll a apoprotein A1, putative, expressed; Photosystem I, PsaA/PsaB protein	Photosystem I, PsaA/PsaB protein	PsaA_PsaB	PsaA_PsaB
Gohir.D05G272266.1	NEC	EC	7.57779	5.3312e-11	1.24056e-09	0	0	0	SignalP-noTM	0	0	0	NA	NA	0	PRIMA1, Mito_fiss_reg, CAP_N	PRIMA1, Mito_fiss_reg, CAP_N
Gohir.A11G222402.1	NEC	EC	7.57644	0.000633619	0.00278267	0	0	0	0	0	GO:0005524,GO:0007015,GO:0034314,GO:0005885	0	AT1G13180	actin, putative, expressed; Actin-like ATPase superfamily protein	Actin-like ATPase superfamily protein	Actin	Actin
Gohir.D05G349250.1	NEC	EC	7.57644	0.000633619	0.00278267	0	0	0	0	0	0	0	NA	NA	NA	#N/A	#N/A
Gohir.A10G094900.1	NEC	EC	7.57411	2.52339e-12	7.59714e-11	0	0	0	0	0	0	0	AT5G66780	expressed protein	0	TubC_N	TubC_N
Gohir.D09G120100.1	NEC	EC	7.57092	1.05254e-08	1.49392e-07	0	0	0	0	0	0	0	AT3G57500	expressed protein	0	PAP2	PAP2
Gohir.D02G206400.1	NEC	EC	7.5634	0.00402193	0.0137072	PF02704	0	0	SignalP-noTM	0	0	0	AT5G59845	GASR3 - Gibberellin-regulated GASA/GAST/Snakin family protein precursor, expressed; Gibberellin-regulated family protein	Gibberellin-regulated family protein	GASA	GASA
Gohir.D10G145801.1	NEC	EC	7.54134	0.000804027	0.00342054	0	0	3.3.2.6	0	0	0	0	NA	NA	peptidase M1 family protein	AID	AID
Gohir.D11G198200.2	NEC	EC	7.53324	8.33854e-11	1.86704e-09	0	0	0	0	0	0	0	AT5G66800	expressed protein	0	#N/A	#N/A
Gohir.D04G017480.1	NEC	EC	7.51771	8.36405e-06	6.09102e-05	0	0	3.4.25.1	0	0	0	0	NA	NA	NA	Proteasome, Ovate	Proteasome, Ovate
Gohir.A02G017001.1	NEC	EC	7.51161	1.54152e-08	2.11646e-07	0	0	0	0	0	0	0	NA	NA	0	#N/A	#N/A
Gohir.D07G151750.1	NEC	EC	7.50989	1.12644e-13	4.36356e-12	0	0	1.1.1.348	0	0	0	0	AT2G45400	dihydroflavonol-4-reductase, putative, expressed; NAD(P)-binding Rossmann-fold superfamily protein	NAD(P)-binding Rossmann-fold superfamily protein	Epimerase	Epimerase
Gohir.D05G260250.1	NEC	EC	7.49637	0.00502308	0.0165493	PF00537	0	0	SignalP-noTM	0	GO:0005576,GO:0008200	0	AT1G19610	Arabidopsis defensin-like protein	Arabidopsis defensin-like protein	Toxin_3, Gamma-thionin	Toxin_3, Gamma-thionin
Gohir.A12G140900.3	NEC	EC	7.49549	1.60987e-11	4.15635e-10	0	0	0	0	0	0	0	NA	NA	Histidine kinase-, DNA gyrase B-, and HSP90-like ATPase family protein	Rootletin, Syntaxin-6_N, Jnk-SapK_ap_N, PspA_IM30, Golgin_A5, DUF4407, Bacillus_HBL, TPR_MLP1_2, OmpH, Nup88, Fmp27_WPPW, Exonuc_VII_L, KxDL, TMPIT, Csm1_N	Rootletin, Syntaxin-6_N, Jnk-SapK_ap_N, PspA_IM30, Golgin_A5, DUF4407, Bacillus_HBL, TPR_M
Gohir.A05G258500.1	NEC	EC	7.49463	2.78689e-08	3.629e-07	PF00537	0	0	SignalP-noTM	0	GO:0005576,GO:0008200	0	AT1G19610	Arabidopsis defensin-like protein	Arabidopsis defensin-like protein	Toxin_3, Gamma-thionin	Toxin_3, Gamma-thionin
Gohir.A06G107402.1	NEC	EC	7.48641	0.00404737	0.0137827	0	0	0	0	0	0	0	NA	NA	NA	#N/A	#N/A
Gohir.D02G081750.1	NEC	EC	7.46463	0.00401469	0.0136893	0	0	0	0	0	0	0	NA	NA	NA	#N/A	#N/A
Gohir.A04G036401.1	NEC	EC	7.45898	0.000701906	0.00303584	0	0	0	0	0	0	0	NA	NA	NA	#N/A	#N/A
Gohir.A11G182900.1	NEC	EC	7.45898	0.000701906	0.00303584	0	0	0	SignalP-noTM	0	0	0	NA	NA	0	#N/A	#N/A
Gohir.D10G059650.1	NEC	EC	7.45898	0.000701906	0.00303584	0	0	3.6.3.1	0	0	0	0	AT1G17500	phospholipid-transporting ATPase 4, putative, expressed; ATPase E1-E2 type family protein / haloacid dehalogenase-like hydrolase family protein	ATPase E1-E2 type family protein / haloacid dehalogenase-like hydrolase family protein	PhoLip_ATPase_N	PhoLip_ATPase_N
Gohir.D13G056650.1	NEC	EC	7.45898	0.000701906	0.00303584	PF07145	0	0	0	0	0	0	NA	NA	CTC-interacting domain 9	PAM2	PAM2
Gohir.D02G159400.1	NEC	EC	7.44313	2.48408e-10	5.04168e-09	0	0	0	0	0	0	0	AT5G40460	expressed protein	0	#N/A	#N/A
Gohir.D01G185301.1	NEC	EC	7.43956	0.000907609	0.00380585	0	0	0	0	0	0	0	AT4G04750	transporter family protein, putative, expressed; Major facilitator superfamily protein	Major facilitator superfamily protein	Sugar_tr	Sugar_tr
Gohir.D01G153650.1	NEC	EC	7.41848	1.77595e-12	5.49724e-11	0	0	0	0	0	0	0	NA	NA	NA	#N/A	#N/A
Gohir.A11G107150.1	NEC	EC	7.40982	0.00420699	0.0142308	0	0	0	0	0	0	0	NA	NA	0	#N/A	#N/A
Gohir.A11G123800.1	NEC	EC	7.39005	5.20967e-07	5.06863e-06	PF04927	0	0	0	0	0	0	AT3G22490	late embryogenesis abundant protein D-34, putative, expressed; Seed maturation protein	Seed maturation protein	SMP, MTBP_C	SMP, MTBP_C
Gohir.A01G019300.1	NEC	EC	7.33281	2.00514e-06	1.70279e-05	PF00642	0	0	0	0	GO:0046872	0	AT1G03790	zinc finger/CCCH transcription factor, putative, expressed; Zinc finger C-x8-C-x5-C-x3-H type family protein	Zinc finger C-x8-C-x5-C-x3-H type family protein	zf-CCCH, zf-CCCH_2, zf_CCCH_4	zf-CCCH, zf-CCCH_2, zf_CCCH_4
Gohir.D05G021220.1	NEC	EC	7.32893	4.03229e-08	5.02421e-07	0	0	0	SignalP-noTM	0	0	0	NA	NA	NA	#N/A	#N/A
Gohir.D10G005200.1	NEC	EC	7.32822	8.63285e-06	6.26505e-05	PF01397	0	4.2.3.8	0	0	GO:0008152,GO:0016829,GO:0010333	0	AT3G14490	terpene synthase, putative, expressed; Terpenoid cyclases/Protein prenyltransferases superfamily protein	Terpenoid cyclases/Protein prenyltransferases superfamily protein	Terpene_synth	Terpene_synth
Gohir.D04G090816.1	NEC	EC	7.32048	1.51001e-09	2.56934e-08	PF00284	0	0	0	0	GO:0015979,GO:0020037,GO:0019684,GO:0016021,GO:0009523,GO:0046872,GO:0009767	0	ATCG00580	cytochrome b559 subunit alpha, putative, expressed; photosystem II reaction center protein E	photosystem II reaction center protein E	Cytochrom_B559a, Cytochrom_B559	Cytochrom_B559a, Cytochrom_B559
Gohir.A12G093400.1	NEC	EC	7.31745	5.87198e-11	1.35481e-09	PF01190	0	0	SignalP-noTM	0	0	0	AT4G08685	POEI24 - Pollen Ole e I allergen and extensin family protein precursor, expressed; Pollen Ole e 1 allergen and extensin family protein	Pollen Ole e 1 allergen and extensin family protein	Pollen_Ole_e_I	Pollen_Ole_e_I
Gohir.D12G128100.5	NEC	EC	7.29874	2.40747e-11	5.99132e-10	PF03106	0	0	0	0	GO:0043565,GO:0003700,GO:0006355	0	AT2G34830	WRKY37, expressed; WRKY DNA-binding protein 35	WRKY DNA-binding protein 65	WRKY	WRKY
Gohir.D03G154600.1	NEC	EC	7.2914	7.34831e-06	5.42917e-05	PF00847	0	0	0	0	GO:0003700,GO:0006355	0	AT5G51990	dehydration-responsive element-binding protein, putative, expressed; C-repeat-binding factor 4	C-repeat-binding factor 4	AP2	AP2
Gohir.A05G375301.1	NEC	EC	7.23857	0.000960952	0.00400157	0	0	0	0	0	0	0	NA	NA	NA	#N/A	#N/A
Gohir.D07G148300.1	NEC	EC	7.23105	0.00442873	0.0148666	0	0	0	0	0	0	0	NA	NA	0	CHCH, DUF1690, BioW, DUF4189	CHCH, DUF1690, BioW, DUF4189
Gohir.D11G296784.1	NEC	EC	7.21327	3.0972e-08	3.97705e-07	0	0	0	0	0	0	0	NA	NA	NA	#N/A	#N/A
Gohir.D01G046400.3	NEC	EC	7.20907	0.0011663	0.00473674	PF05129	KOG3214	0	0	0	0	0	AT5G46030	transcription elongation factor 1, putative, expressed	0	Elf1, UBZ_FAAP20, zf-C2H2_4, zf-AN1	Elf1, UBZ_FAAP20, zf-C2H2_4, zf-AN1
Gohir.D05G321166.1	NEC	EC	7.20422	0.0047091	0.0156592	0	0	0	0	0	0	0	NA	NA	NA	#N/A	#N/A
Gohir.D07G021800.2	NEC	EC	7.20067	1.43246e-09	2.45275e-08	0	0	0	0	0	0	0	AT5G11960	expressed protein; Protein of unknown function (DUF803)	Protein of unknown function (DUF803)	DUF4501	DUF4501
Gohir.A12G037900.1	NEC	EC	7.18914	0.000907121	0.00380415	0	0	0	SignalP-TM	0	0	0	NA	NA	low-molecular-weight cysteine-rich 44	Gamma-thionin	Gamma-thionin
Gohir.D10G215733.1	NEC	EC	7.16582	1.92986e-09	3.21278e-08	PF00676	0	0	0	0	GO:0008152,GO:0016624	0	AT1G67170	protein kinase PKN/PRK1, effector, putative, expressed	0	E1_dh, CENP-F_leu_zip, Rab5-bind, DUF720, CENP-F_N, GAS, DUF1818, Cep57_CLD_2, Spc24, Fez1, Cob_adeno_trans, DUF4618, OmpH, PRKG1_interact, SKA2, DUF4407, Mito_fiss_reg, Spc7, Rootletin, ERM, ATG16, Lebercilin, FlxA, TMF_DNA_bd, ADIP, Csm1_N, ABC_tran_CTD, Mod_r, Uso1_p115_C, TolA_bind_tri, DUF4140, YabA, IFP_35_N, ZapB, APG6_N	E1_dh, CENP-F_leu_zip, Rab5-bind, DUF720, CENP-F_N, GAS, DUF1818, Cep57_CLD_2, Spc24, Fez1
Gohir.A09G101340.1	NEC	EC	7.16171	2.15089e-10	4.43954e-09	0	0	2.7.7.6	0	0	0	0	ATCG00170	DNA-directed RNA polymerase subunit beta, putative, expressed; DNA-directed RNA polymerase family protein	DNA-directed RNA polymerase family protein	#N/A	#N/A
Gohir.A08G117900.1	NEC	EC	7.14591	1.93121e-06	1.64727e-05	PF03242	0	0	0	0	GO:0006950	0	AT4G02380	late embryogenesis abundant protein, putative, expressed; senescence-associated gene 21	senescence-associated gene 21	LEA_3	LEA_3
Gohir.A01G126666.1	NEC	EC	7.14402	0.00127707	0.00512935	0	0	0	0	0	0	0	NA	NA	NA	#N/A	#N/A
Gohir.D06G077950.1	NEC	EC	7.10672	8.13093e-09	1.18313e-07	0	0	0	0	0	0	0	NA	NA	NA	#N/A	#N/A
Gohir.D09G182300.1	NEC	EC	7.10672	8.13093e-09	1.18313e-07	PF13639	0	0	0	0	0	0	NA	NA	RING/U-box superfamily protein	zf-RING_2, zf-rbx1, zf-RING_UBOX, zf-RING_11, zf-C3HC4, zf-C3HC4_2, zf-RING_4, RINGv, zf-RING_5, zf-ANAPC11, Prok-RING_4, zf-C3HC4_3, Zn_ribbon_17, zf-C3HC4_4, zf-Nse, zf-UDP, zf-RING_9, Prok-RING_1, PHD, Zf_RING, zf-C3HC4_5, FANCL_C, zf-RING-like	zf-RING_2, zf-rbx1, zf-RING_UBOX, zf-RING_11, zf-C3HC4, zf-C3HC4_2, zf-RING_4, RINGv, zf-R
Gohir.A04G103800.1	NEC	EC	7.08004	0.00101212	0.00418973	0	0	0	0	0	0	0	NA	NA	0	#N/A	#N/A
Gohir.D08G143200.1	NEC	EC	7.07007	2.28734e-13	8.40278e-12	PF02309	0	0	0	K14484	GO:0006355,GO:0005634	0	AT2G46990	OsIAA4 - Auxin-responsive Aux/IAA gene family member, expressed; indole-3-acetic acid inducible 20	indole-3-acetic acid inducible 30	AUX_IAA	AUX_IAA
Gohir.D11G163033.1	NEC	EC	7.04842	0.00549424	0.0178532	0	0	0	0	0	0	0	AT1G34320	expressed protein; Protein of unknown function (DUF668)	Protein of unknown function (DUF668)	#N/A	#N/A
Gohir.A05G126700.3	NEC	EC	7.0269	7.66923e-09	1.12231e-07	0	0	0	0	0	0	0	NA	NA	0	HlyIII, hEGF	HlyIII, hEGF
Gohir.A03G180500.2	NEC	EC	7.00571	1.62911e-08	2.22679e-07	PF05770	0	2.7.1.159	0	K00913	GO:0000287,GO:0047325,GO:0005524,GO:0032957,GO:0052725,GO:0005622,GO:0052726	0	AT4G08170	Inositol 1, 3, 4-trisphosphate 5/6-kinase, putative, expressed; Inositol 1,3,4-trisphosphate 5/6-kinase family protein	Inositol 1,3,4-trisphosphate 5/6-kinase family protein	Ins134_P3_kin, Ins134_P3_kin_N	Ins134_P3_kin, Ins134_P3_kin_N
Gohir.D11G242966.1	NEC	EC	6.9923	0.00519707	0.0170387	0	0	0	0	0	0	0	NA	NA	NA	#N/A	#N/A
Gohir.A11G223525.1	NEC	EC	6.99043	0.00140756	0.00558074	0	0	0	0	0	0	0	NA	NA	NA	Col_cuticle_N	Col_cuticle_N
Gohir.D04G166400.1	NEC	EC	6.98927	1.03624e-05	7.36414e-05	PF00257	0	0	0	0	GO:0009415,GO:0006950	0	NA	NA	NA	Dehydrin, SR-25, RHS, AUX_IAA, DUF4741, CCDC106	Dehydrin, SR-25, RHS, AUX_IAA, DUF4741, CCDC106
Gohir.A01G179666.1	NEC	EC	6.98562	0.00110091	0.00450523	0	0	0	0	0	0	0	NA	NA	NA	RNA_polI_A34	RNA_polI_A34
Gohir.D01G170550.1	NEC	EC	6.98562	0.00110091	0.00450523	0	0	0	0	0	0	0	NA	NA	NA	RNA_polI_A34	RNA_polI_A34
Gohir.D13G085600.1	NEC	EC	6.98409	8.92914e-08	1.03344e-06	0	0	0	SignalP-noTM	0	0	0	NA	NA	0	HOK_GEF	HOK_GEF
Gohir.A07G037533.1	NEC	EC	6.97686	0.00500688	0.0165006	0	0	0	0	0	0	0	NA	NA	0	#N/A	#N/A
Gohir.D12G112466.1	NEC	EC	6.97495	2.52327e-09	4.10455e-08	0	0	0	0	0	0	0	AT2G18300	helix-loop-helix DNA-binding domain containing protein, expressed; basic helix-loop-helix (bHLH) DNA-binding superfamily protein	basic helix-loop-helix (bHLH) DNA-binding superfamily protein	Tnp_DNA_bind	Tnp_DNA_bind
Gohir.A06G059650.1	NEC	EC	6.95977	6.26178e-07	5.97403e-06	0	0	0	0	0	0	0	AT2G26910	pleiotropic drug resistance protein, putative, expressed; pleiotropic drug resistance 4	pleiotropic drug resistance 4	#N/A	#N/A
Gohir.D10G191975.1	NEC	EC	6.94502	4.14237e-06	3.24302e-05	PF11976	KOG1769	0	0	0	0	0	NA	NA	NA	Rad60-SLD	Rad60-SLD
Gohir.A06G098102.1	NEC	EC	6.93997	3.28424e-08	4.1743e-07	0	0	0	0	0	0	0	NA	NA	NA	#N/A	#N/A
Gohir.A05G304300.1	NEC	EC	6.85044	0.00548485	0.0178279	0	0	0	0	0	0	0	AT2G21820	seed maturation protein PM41, putative, expressed	0	#N/A	#N/A
Gohir.D09G085900.1	NEC	EC	6.84783	0.00534437	0.0174412	PF02298	0	0	SignalP-noTM	0	GO:0009055	0	AT2G02850	plastocyanin-like domain containing protein, putative, expressed; plantacyanin	plantacyanin	Cu_bind_like, SoxE	Cu_bind_like, SoxE
Gohir.D07G123466.1	NEC	EC	6.8377	0.00553805	0.0179667	0	0	0	0	0	0	0	NA	NA	NA	#N/A	#N/A
Gohir.D06G155900.1	NEC	EC	6.83186	0.0056975	0.0183839	0	0	0	0	0	0	0	NA	NA	0	Glyco_H_20C_C	Glyco_H_20C_C
Gohir.D12G077408.1	NEC	EC	6.80504	0.00136988	0.00545052	0	0	0	0	0	0	0	NA	NA	NA	#N/A	#N/A
Gohir.D01G110850.1	NEC	EC	6.77601	0.00133317	0.00532646	0	0	0	0	0	0	0	NA	NA	NA	#N/A	#N/A
Gohir.D05G183833.1	NEC	EC	6.76343	0.00578528	0.018621	PF02519	0	0	0	0	GO:0009733	0	AT1G29500	OsSAUR45 - Auxin-responsive SAUR gene family member, expressed; SAUR-like auxin-responsive protein family	SAUR-like auxin-responsive protein family	Auxin_inducible	Auxin_inducible
Gohir.A04G039450.1	NEC	EC	6.72975	0.00163256	0.00633956	0	0	0	0	0	0	0	NA	NA	NADH-Ubiquinone/plastoquinone (complex I) protein	#N/A	#N/A
Gohir.D03G019675.1	NEC	EC	6.70624	0.00161135	0.00626825	PF02362	0	0	0	0	GO:0003677	0	AT3G18990	B3 DNA binding domain containing protein, expressed; AP2/B3-like transcriptional factor family protein	AP2/B3-like transcriptional factor family protein	B3	B3
Gohir.A09G017750.1	NEC	EC	6.69304	0.00614081	0.0195867	0	0	0	0	0	0	0	NA	NA	Myosin family protein with Dil domain	DNA_pol_B_thumb, DUF3601	DNA_pol_B_thumb, DUF3601
Gohir.A11G061700.1	NEC	EC	6.58643	0.00596521	0.019119	PF13671	0	0	0	0	0	0	NA	NA	0	AAA_33, Zeta_toxin, KTI12, AAA_18, AAA, TsaE, SKI, NACHT, Cytidylate_kin2, AAA_28, Torsin, AAA_16, AAA_5, CoaE, CPT, AAA_30, Cytidylate_kin, RNA_helicase, AAA_22, IstB_IS21, RsgA_GTPase, ABC_tran, Ploopntkinase3, Mg_chelatase, NB-ARC, MeaB, DUF2075, AAA_29, 6PF2K, AAA_17, MMR_HSR1, APS_kinase	AAA_33, Zeta_toxin, KTI12, AAA_18, AAA, TsaE, SKI, NACHT, Cytidylate_kin2, AAA_28, Torsin,
Gohir.A09G085000.1	NEC	EC	6.51201	1.9876e-11	5.03314e-10	0	0	0	0	0	0	0	NA	NA	Late embryogenesis abundant protein (LEA) family protein	LEA_4, Apolipoprotein, YtxH, DUF4449, DUF883, LAP1C, CaM_bdg_C0, TP53IP5, Neur_chan_memb, Mobilization_B	LEA_4, Apolipoprotein, YtxH, DUF4449, DUF883, LAP1C, CaM_bdg_C0, TP53IP5, Neur_chan_memb,
Gohir.D06G182800.1	NEC	EC	6.46445	0.00657024	0.0207558	0	0	0	0	0	0	0	NA	NA	0	DUF1899	DUF1899
Gohir.A04G124300.1	NEC	EC	5.91804	0.000130932	0.000695746	PF00257	0	0	0	0	GO:0006950,GO:0009415	0	NA	NA	NA	Dehydrin, SR-25, RHS, AP3D1, PP2C_C	Dehydrin, SR-25, RHS, AP3D1, PP2C_C
Gohir.D08G087700.1	NEC	EC	5.91484	5.90142e-05	0.000344484	PF01127	0	0	0	K00236	GO:0016627	0	NA	NA	succinate dehydrogenase 3-1	Sdh_cyt, Presenilin, DUF2157, DUF5480, TMEM40	Sdh_cyt, Presenilin, DUF2157, DUF5480, TMEM40
Gohir.D12G095700.2	NEC	EC	5.60102	2.86502e-14	1.24557e-12	PF13085,PF13534	0	1.3.5.1	0	0	GO:0009055,GO:0051536	0	AT5G65165	succinate dehydrogenase and fumarate reductase iron-sulfur protein, expressed; succinate dehydrogenase 2-3	succinate dehydrogenase 2-3	Fer2_3, Fer4_8, Fer4_17, Fer4_10, Fer4_7, Fer2, Fer4_16, Fer4_18, Fer4_9	Fer2_3, Fer4_8, Fer4_17, Fer4_10, Fer4_7, Fer2, Fer4_16, Fer4_18, Fer4_9
Gohir.D07G199000.1	NEC	EC	5.52044	2.13261e-14	9.51319e-13	PF00067	KOG0156	1.14.13.117	0	K12153	GO:0055114,GO:0020037,GO:0016705,GO:0005506	0	AT5G05260	cytochrome P450, putative, expressed; cytochrome p450 79a2	cytochrome P450, family 79, subfamily B, polypeptide 2	p450	p450
Gohir.A08G053900.1	NEC	EC	5.48058	1.39688e-09	2.39805e-08	0	0	0	0	0	0	0	AT1G07985	expressed protein; Expressed protein	Expressed protein	#N/A	#N/A
Gohir.D09G154600.1	NEC	EC	5.466	2.36422e-06	1.975e-05	PF13912	0	0	0	0	0	0	AT2G37430	ZOS2-19 - C2H2 zinc finger protein, expressed; C2H2 and C2HC zinc fingers superfamily protein	C2H2 and C2HC zinc fingers superfamily protein	zf-C2H2_6, zf-C2H2_4, zf-C2H2, zf-CHY, FYVE, zf_UBZ, zf-C2H2_2, zf-H2C2_2, zf-C2H2_11	zf-C2H2_6, zf-C2H2_4, zf-C2H2, zf-CHY, FYVE, zf_UBZ, zf-C2H2_2, zf-H2C2_2, zf-C2H2_11
Gohir.D04G152500.1	NEC	EC	5.45845	1.24165e-06	1.10285e-05	PF02068	0	0	0	0	GO:0008270	0	NA	NA	Plant EC metallothionein-like protein, family 15	Metallothio_PEC, Metallothio_2, Metallothio_Euk	Metallothio_PEC, Metallothio_2, Metallothio_Euk
Gohir.A06G024500.2	NEC	EC	5.45785	8.2436e-08	9.61802e-07	0	0	0	0	0	0	0	NA	NA	0	#N/A	#N/A
Gohir.D05G010000.3	NEC	EC	5.45662	1.43816e-22	2.29977e-20	PF00641	0	0	0	0	0	0	AT3G15680	zinc finger family protein, putative, expressed; Ran BP2/NZF zinc finger-like superfamily protein	Ran BP2/NZF zinc finger-like superfamily protein	zf-RanBP, DZR, HypA	zf-RanBP, DZR, HypA
Gohir.A11G201900.1	NEC	EC	5.44393	1.68379e-09	2.83684e-08	PF00168	0	0	0	0	0	0	AT5G65030	expressed protein	0	C2, CEP76-C2	C2, CEP76-C2
Gohir.A08G203000.1	NEC	EC	5.44381	5.87304e-10	1.10467e-08	PF03195	0	0	0	0	0	0	AT2G30130	DUF260 domain containing protein, putative, expressed; Lateral organ boundaries (LOB) domain family protein	Lateral organ boundaries (LOB) domain family protein	LOB, DUF4094	LOB, DUF4094
Gohir.D03G067300.1	NEC	EC	5.44013	7.7595e-12	2.1307e-10	PF02045	KOG1561	0	0	0	GO:0006355,GO:0003700	0	AT5G12840	nuclear transcription factor Y subunit, putative, expressed; nuclear factor Y, subunit A1	nuclear factor Y, subunit A1	CBFB_NFYA	CBFB_NFYA
Gohir.D06G080700.2	NEC	EC	5.40777	2.91557e-08	3.78058e-07	0	0	0	0	0	0	0	NA	NA	hydroxyproline-rich glycoprotein family protein	CREPT, Aft1_HRR	CREPT, Aft1_HRR
Gohir.A11G249900.1	NEC	EC	5.40461	4.17259e-18	3.42508e-16	PF01918	0	0	0	0	GO:0003676	0	AT3G04620	protein of unknown function domain containing protein, expressed; Alba DNA/RNA-binding protein	Alba DNA/RNA-binding protein	Alba, Rpp20	Alba, Rpp20
Gohir.A09G208600.1	NEC	EC	5.40266	3.47307e-07	3.53068e-06	PF06884	0	0	0	0	0	0	AT1G05510	DUF1264 domain containing protein, putative, expressed; Protein of unknown function (DUF1264)	Protein of unknown function (DUF1264)	DUF1264	DUF1264
Gohir.A09G028800.1	NEC	EC	5.3894	0.000458719	0.00209417	PF01277	0	0	0	0	GO:0012511,GO:0016021	0	AT3G01570	oleosin, putative, expressed; Oleosin family protein	Oleosin family protein	Oleosin, Phage_holin_3_6, DUF1206	Oleosin, Phage_holin_3_6, DUF1206
Gohir.A07G107300.1	NEC	EC	5.34316	0.00010552	0.000576623	PF06404	0	0	SignalP-noTM	0	GO:0008083,GO:0005576,GO:0008283	0	AT3G44735	phytosulfokines precursor, putative, expressed; PHYTOSULFOKINE 3 PRECURSOR	PHYTOSULFOKINE 3 PRECURSOR	PSK, MotB_plug	PSK, MotB_plug
Gohir.D05G007600.1	NEC	EC	5.22308	8.25498e-14	3.30872e-12	0	0	0	0	0	0	0	AT4G16850	expressed protein	0	#N/A	#N/A
Gohir.A12G003800.1	NEC	EC	5.2158	2.07154e-12	6.31909e-11	PF00190	0	0	SignalP-noTM	0	GO:0045735	0	NA	NA	cupin family protein	Cupin_1, Cupin_2, AraC_binding, Cupin_6, U79_P34, CENP-C_C, Vanabin-2, FAM176	Cupin_1, Cupin_2, AraC_binding, Cupin_6, U79_P34, CENP-C_C, Vanabin-2, FAM176
Gohir.D01G004100.1	NEC	EC	5.20512	3.49389e-15	1.7589e-13	PF01426,PF00628	0	0	0	0	GO:0003682	0	AT4G39100	ES43 protein, putative, expressed; PHD finger family protein / bromo-adjacent homology (BAH) domain-containing protein	PHD finger family protein / bromo-adjacent homology (BAH) domain-containing protein	BAH, PHD, PHD_4, zf-RING_2	BAH, PHD, PHD_4, zf-RING_2
Gohir.A10G084300.1	NEC	EC	5.17411	1.49204e-33	8.84017e-31	0	0	0	SignalP-noTM	0	0	0	NA	NA	0	RNA_pol_I_TF, DUF1543, Lipase	RNA_pol_I_TF, DUF1543, Lipase
Gohir.A07G027750.1	NEC	EC	5.14738	2.28148e-10	4.67153e-09	PF00847	0	0	0	0	GO:0003700,GO:0006355	0	AT5G25390	AP2 domain containing protein, expressed; Integrase-type DNA-binding superfamily protein	Integrase-type DNA-binding superfamily protein	AP2, DUF98, OLF	AP2, DUF98, OLF
Gohir.A04G112024.1	NEC	EC	5.14115	7.4029e-05	0.000421223	PF02068	0	0	0	0	GO:0008270	0	NA	NA	Plant EC metallothionein-like protein, family 15	Metallothio_PEC, Metallothio_Euk, Metallothio_2	Metallothio_PEC, Metallothio_Euk, Metallothio_2
Gohir.A11G151200.1	NEC	EC	5.12934	4.13905e-33	2.33271e-30	0	0	0	0	0	0	0	NA	NA	NA	#N/A	#N/A
Gohir.D05G216400.2	NEC	EC	5.11178	8.36089e-10	1.52482e-08	PF00046,PF02183	0	0	0	0	GO:0006355,GO:0003700,GO:0003677,GO:0043565	0	AT4G37790	homeobox associated leucine zipper, putative, expressed; Homeobox-leucine zipper protein family	Homeobox-leucine zipper protein family	Homeodomain, HALZ, Homeobox_KN, TilS, NRBF2, bZIP_1	Homeodomain, HALZ, Homeobox_KN, TilS, NRBF2, bZIP_1
Gohir.D12G018600.1	NEC	EC	5.10752	3.66147e-07	3.70427e-06	PF05903	KOG0324	0	0	0	0	0	AT1G47740	ethylene-responsive element-binding protein, putative, expressed; PPPDE putative thiol peptidase family protein	PPPDE putative thiol peptidase family protein	Peptidase_C97, LRAT	Peptidase_C97, LRAT
Gohir.D11G093600.1	NEC	EC	5.10256	1.54856e-08	2.1239e-07	PF00230	KOG0223	0	0	K09872	GO:0005215,GO:0006810,GO:0016020	0	AT1G01620	aquaporin protein, putative, expressed; plasma membrane intrinsic protein 1C	plasma membrane intrinsic protein 1;4	MIP	MIP
Gohir.D09G129800.1	NEC	EC	5.05336	2.70406e-10	5.44037e-09	PF02701	0	0	0	0	GO:0006355,GO:0003677	0	NA	NA	Dof-type zinc finger DNA-binding family protein	zf-Dof, Mu-like_Com, OrfB_Zn_ribbon, Zn_Tnp_IS1595	zf-Dof, Mu-like_Com, OrfB_Zn_ribbon, Zn_Tnp_IS1595
Gohir.D11G041300.1	NEC	EC	5.01776	0.000913231	0.00382491	PF00010	0	0	0	0	GO:0046983	0	NA	NA	basic helix-loop-helix (bHLH) DNA-binding superfamily protein	HLH, Use1	HLH, Use1
Gohir.A10G032200.1	NEC	EC	5.01371	0.000224359	0.00111862	PF03171,PF14226	KOG0143	1.14.11.32	0	0	GO:0016491,GO:0055114	0	AT1G17020	naringenin,2-oxoglutarate 3-dioxygenase, putative, expressed; senescence-related gene 1	senescence-related gene 1	2OG-FeII_Oxy, DIOX_N	2OG-FeII_Oxy, DIOX_N
Gohir.A08G049901.1	NEC	EC	5.01256	1.83479e-08	2.48368e-07	0	0	0	0	0	0	0	NA	NA	NA	eIF3_N	eIF3_N
Gohir.D06G145400.1	NEC	EC	4.9917	1.13059e-08	1.59345e-07	PF13920	KOG1100	0	0	0	0	0	AT4G19700	protein binding protein, putative, expressed; SBP (S-ribonuclease binding protein) family protein	SBP (S-ribonuclease binding protein) family protein	zf-C3HC4_3, Prok-RING_4, zf-RING_5	zf-C3HC4_3, Prok-RING_4, zf-RING_5
Gohir.A09G217700.1	NEC	EC	4.9847	6.7289e-05	0.000386778	PF00190,PF04702	0	0	SignalP-noTM	0	GO:0045735	0	NA	NA	cupin family protein	Vicilin_N, Cupin_1, Cupin_2, CENP-C_C	Vicilin_N, Cupin_1, Cupin_2, CENP-C_C
Gohir.D11G315000.1	NEC	EC	4.9577	0.00705233	0.0220348	PF03195	0	0	0	0	0	0	AT3G03760	DUF260 domain containing protein, putative, expressed; LOB domain-containing protein 20	LOB domain-containing protein 20	LOB, Androgen_recep, TFIIA	LOB, Androgen_recep, TFIIA
Gohir.A09G142800.1	NEC	EC	4.92922	5.96653e-06	4.51436e-05	PF02987	0	0	0	0	0	0	NA	NA	late embryogenesis abundant protein, putative / LEA protein, putative	LEA_4, Apolipoprotein, Mucin-like, YtxH	LEA_4, Apolipoprotein, Mucin-like, YtxH
Gohir.A08G239000.1	NEC	EC	4.91379	1.02874e-05	7.3164e-05	PF00271,PF00270	KOG0335	3.6.4.13	0	K11594	GO:0005524,GO:0003676	0	AT3G58570	P-loop containing nucleoside triphosphate hydrolases superfamily protein	P-loop containing nucleoside triphosphate hydrolases superfamily protein	DEAD, Helicase_C	DEAD, Helicase_C
Gohir.A07G230300.1	NEC	EC	4.90307	3.57098e-08	4.50039e-07	PF07765	0	0	0	0	GO:0003779	0	NA	NA	Kinase interacting (KIP1-like) family protein	KIP1, DUF745, PIN_8, Allexi_40kDa, DUF5344	KIP1, DUF745, PIN_8, Allexi_40kDa, DUF5344
Gohir.A09G106500.1	NEC	EC	4.88033	3.19916e-25	7.50487e-23	PF00010	0	0	0	0	GO:0003677,GO:0046983	0	AT3G56970	helix-loop-helix DNA-binding domain containing protein, expressed; basic helix-loop-helix (bHLH) DNA-binding superfamily protein	basic helix-loop-helix (bHLH) DNA-binding superfamily protein	HLH, DUF1850, PAH	HLH, DUF1850, PAH
Gohir.A04G100800.1	NEC	EC	4.87773	0.00251369	0.00920796	PF07207	0	0	0	0	0	0	AT3G26740	light-induced protein 1-like, putative, expressed; CCR-like	CCR-like	Lir1	Lir1
Gohir.D03G112500.1	NEC	EC	4.86779	2.41698e-05	0.000155569	PF00106	KOG1205	1.1.1.62	0	0	0	0	AT5G50600	dehydrogenase/reductase, putative, expressed; hydroxysteroid dehydrogenase 1	hydroxysteroid dehydrogenase 1	adh_short, adh_short_C2, KR, NAD_binding_10, Polysacc_synt_2, YbjQ_1, DUF1776, Epimerase	adh_short, adh_short_C2, KR, NAD_binding_10, Polysacc_synt_2, YbjQ_1, DUF1776, Epimerase
Gohir.A04G094200.1	NEC	EC	4.85045	0.000147086	0.000770684	PF01161	0	0	0	K06910	0	0	AT5G01300	phosphatidylethanolamine-binding protein, putative, expressed; PEBP (phosphatidylethanolamine-binding protein) family protein	PEBP (phosphatidylethanolamine-binding protein) family protein	PBP	PBP
Gohir.A13G216200.2	NEC	EC	4.83997	1.51342e-12	4.72896e-11	0	0	0	0	0	0	0	AT3G57670	ZOS6-05 - C2H2 zinc finger protein, expressed; C2H2-type zinc finger family protein	C2H2-type zinc finger family protein	zf-C2H2, zf-C2H2_4, zf-C2H2_6, zf-C2H2_2, zf-C2H2_3rep, zf-H2C2_2, zf-C2H2_jaz, zf-LYAR, UPF0515	zf-C2H2, zf-C2H2_4, zf-C2H2_6, zf-C2H2_2, zf-C2H2_3rep, zf-H2C2_2, zf-C2H2_jaz, zf-LYAR, U
Gohir.A09G093200.3	NEC	EC	4.83975	2.25806e-06	1.89734e-05	PF06404	0	0	0	0	GO:0005576,GO:0008283,GO:0008083	0	AT3G44735	phytosulfokines precursor, putative, expressed; PHYTOSULFOKINE 3 PRECURSOR	PHYTOSULFOKINE 3 PRECURSOR	PSK, DUF5531	PSK, DUF5531
Gohir.A03G072101.1	NEC	EC	4.82921	6.14828e-32	2.84137e-29	0	0	0	SignalP-noTM	0	0	0	NA	NA	NA	#N/A	#N/A
Gohir.D13G110500.2	NEC	EC	4.8093	8.03534e-08	9.39876e-07	0	0	0	SignalP-noTM	0	0	0	AT1G54860	uncharacterized GPI-anchored protein At5g19240 precursor, putative, expressed; Glycoprotein membrane precursor GPI-anchored	Glycoprotein membrane precursor GPI-anchored	CAP, ATF7IP_BD	CAP, ATF7IP_BD
Gohir.A01G061200.1	NEC	EC	4.80899	1.51596e-11	3.93368e-10	PF02365	0	0	0	0	GO:0006355,GO:0003677	0	AT5G53950	no apical meristem protein, putative, expressed; NAC (No Apical Meristem) domain transcriptional regulator superfamily protein	NAC (No Apical Meristem) domain transcriptional regulator superfamily protein	NAM	NAM
Gohir.D07G035901.1	NEC	EC	4.80203	8.04202e-12	2.20044e-10	PF03106	0	0	0	0	GO:0043565,GO:0003700,GO:0006355	0	AT4G31800	WRKY76, expressed; WRKY DNA-binding protein 18	WRKY DNA-binding protein 18	WRKY, GIT_CC	WRKY, GIT_CC
Gohir.D10G027300.1	NEC	EC	4.80002	2.07189e-05	0.00013569	0	0	0	0	0	0	0	NA	NA	NA	DUF883, Apolipoprotein, LEA_4, ApoLp-III, HSP9_HSP12, Mitofilin, MT0933_antitox, Alanine_zipper, Prominin, Synuclein, Hormone_1	DUF883, Apolipoprotein, LEA_4, ApoLp-III, HSP9_HSP12, Mitofilin, MT0933_antitox, Alanine_z
Gohir.A01G097700.3	NEC	EC	4.79821	2.04721e-05	0.000134255	0	0	0	0	0	0	0	NA	NA	0	DUF465	DUF465
Gohir.A08G204400.1	NEC	EC	4.7936	8.11257e-18	6.43078e-16	PF01501	KOG1950	2.4.1.123	0	K18819	GO:0006012,GO:0047216,GO:0016757	0	AT1G56600	glycosyl transferase 8 domain containing protein, putative, expressed; galactinol synthase 2	galactinol synthase 2	Glyco_transf_8, Mannosyl_trans3	Glyco_transf_8, Mannosyl_trans3
Gohir.A13G107300.1	NEC	EC	4.7528	0.000257404	0.0012616	0	0	0	SignalP-noTM	0	0	0	AT1G54860	uncharacterized GPI-anchored protein At5g19240 precursor, putative, expressed; Glycoprotein membrane precursor GPI-anchored	Glycoprotein membrane precursor GPI-anchored	CAP, ATF7IP_BD	CAP, ATF7IP_BD
Gohir.D01G066801.1	NEC	EC	4.75276	1.94569e-12	5.99853e-11	PF13639	0	0	0	0	0	0	AT3G20395	RING-H2 finger protein ATL2B, putative, expressed; RING/U-box superfamily protein	RING/U-box superfamily protein	zf-RING_2, zf-rbx1, zf-RING_11, zf-C3HC4_2, zf-C3HC4, zf-RING_UBOX, zf-RING_5, zf-C3HC4_3, zf-ANAPC11, Gly-zipper_YMGG, DUF5518, zf-RING_4, Prok-RING_4, Gly-zipper_Omp, FANCL_C, Zn_ribbon_17, Tmpp129, zf-Nse, RINGv, DUF1404, zf-C3HC4_4, zf-RING-like, Prok-RING_1, DUF1269, Transgly_assoc, Gly-zipper_OmpA, Rick_17kDa_Anti	zf-RING_2, zf-rbx1, zf-RING_11, zf-C3HC4_2, zf-C3HC4, zf-RING_UBOX, zf-RING_5, zf-C3HC4_3,
Gohir.A06G123200.1	NEC	EC	4.75232	6.46205e-11	1.47987e-09	PF06884	0	0	0	0	0	0	AT5G45690	DUF1264 domain containing protein, putative, expressed; Protein of unknown function (DUF1264)	Protein of unknown function (DUF1264)	DUF1264, DUF4679	DUF1264, DUF4679
Gohir.D10G220600.1	NEC	EC	4.73844	1.22142e-07	1.3734e-06	PF05056	0	0	0	0	0	0	NA	NA	Protein of unknown function (DUF674)	DUF674, Anti-TRAP	DUF674, Anti-TRAP
Gohir.D06G029400.1	NEC	EC	4.73693	2.18423e-09	3.59736e-08	PF13041,PF14432,PF01535	0	0	0	0	GO:0008270	0	NA	NA	Tetratricopeptide repeat (TPR)-like superfamily protein	PPR_2, PPR, PPR_1, DYW_deaminase, PPR_3, PPR_long, TPR_14, RPN7, TPR_19, TPR_8, BTAD, TPR_1, TPR_2	PPR_2, PPR, PPR_1, DYW_deaminase, PPR_3, PPR_long, TPR_14, RPN7, TPR_19, TPR_8, BTAD, TPR_
Gohir.D12G006700.2	NEC	EC	4.72066	1.49788e-08	2.06512e-07	PF01627	KOG4747	0	SignalP-noTM	0	GO:0004871,GO:0000160	0	AT1G03430	histidine-containing phosphotransfer protein, putative, expressed; histidine-containing phosphotransfer factor 5	histidine-containing phosphotransfer factor 5	Hpt	Hpt
Gohir.A11G046966.1	NEC	EC	4.71593	5.08938e-12	1.44828e-10	PF01764	KOG4569	3.1.1.3	0	0	GO:0006629	0	AT5G42930	lipase, putative, expressed; alpha/beta-Hydrolases superfamily protein	alpha/beta-Hydrolases superfamily protein	Lipase_3, DUF2974, Abhydrolase_6, Hydrolase_4, Abhydrolase_5, Abhydrolase_1, Abhydrolase_3, PGAP1	Lipase_3, DUF2974, Abhydrolase_6, Hydrolase_4, Abhydrolase_5, Abhydrolase_1, Abhydrolase_3
Gohir.A09G084301.1	NEC	EC	4.71393	0.00238556	0.0088028	0	0	0	0	0	0	0	NA	NA	NA	#N/A	#N/A
Gohir.D12G068500.1	NEC	EC	4.70825	6.13343e-24	1.19599e-21	0	0	0	0	0	0	0	AT5G66800	expressed protein	0	#N/A	#N/A
Gohir.D05G369500.5	NEC	EC	4.70282	2.04953e-26	5.67168e-24	PF13639	0	0	0	0	0	0	AT3G20395	RING-H2 finger protein ATL2B, putative, expressed; RING/U-box superfamily protein	RING/U-box superfamily protein	zf-RING_2, zf-rbx1, zf-RING_11, zf-C3HC4_2, zf-C3HC4, zf-RING_UBOX, zf-ANAPC11, zf-RING_5, zf-C3HC4_3, Zn_ribbon_17, FANCL_C, Prok-RING_4, RINGv, zf-RING_10, zf-RING_6, DUF5518, zf-Nse, zf-RING-like, zf-C3HC4_4, zf-RING_4	zf-RING_2, zf-rbx1, zf-RING_11, zf-C3HC4_2, zf-C3HC4, zf-RING_UBOX, zf-ANAPC11, zf-RING_5,
Gohir.A05G352950.1	NEC	EC	4.70247	0.000802886	0.00341631	0	0	0	0	0	0	0	NA	NA	0	#N/A	#N/A
Gohir.D10G174000.1	NEC	EC	4.69378	7.46363e-22	1.06458e-19	0	0	0	SignalP-TM	0	0	0	AT5G49350	GCRP6 - Glycine and cysteine rich family protein precursor, putative, expressed; Glycine-rich protein family	Glycine-rich protein family	#N/A	#N/A
Gohir.A02G107700.1	NEC	EC	4.68146	6.76903e-08	8.03143e-07	PF00447	0	0	0	K09419	GO:0005634,GO:0043565,GO:0006355,GO:0003700	0	AT2G41690	heat stress transcription factor B-1, putative, expressed; heat shock transcription factor B3	heat shock transcription factor B3	HSF_DNA-bind, PRKG1_interact, PikAIV_N	HSF_DNA-bind, PRKG1_interact, PikAIV_N
Gohir.D05G176100.1	NEC	EC	4.67081	1.44326e-17	1.08807e-15	PF03791,PF03790,PF03789,PF05920	KOG0773	0	0	0	GO:0006355,GO:0003677,GO:0005634	0	AT1G62360	Homeobox domain containing protein, expressed; KNOX/ELK homeobox transcription factor	KNOX/ELK homeobox transcription factor	KNOX1, KNOX2, Homeobox_KN, ELK, Homeodomain, HTH_32	KNOX1, KNOX2, Homeobox_KN, ELK, Homeodomain, HTH_32
Gohir.A12G265200.1	NEC	EC	4.66373	8.50203e-10	1.54629e-08	PF01277	0	0	0	0	GO:0012511,GO:0016021	0	AT3G18570	oleosin, putative, expressed; Oleosin family protein	Oleosin family protein	Oleosin, MAPEG	Oleosin, MAPEG
Gohir.D03G089800.1	NEC	EC	4.66085	3.43828e-11	8.3323e-10	PF00249	0	0	0	0	0	0	AT1G74840	myb-related transcription activator, putative, expressed; Homeodomain-like superfamily protein	myb-like transcription factor family protein	Myb_DNA-binding, Myb_DNA-bind_6	Myb_DNA-binding, Myb_DNA-bind_6
Gohir.A03G123900.1	NEC	EC	4.66002	0.000170417	0.00087624	0	0	0	0	0	0	0	AT1G27990	expressed protein	0	#N/A	#N/A
Gohir.A13G124400.1	NEC	EC	4.65588	0.0116789	0.0335881	0	0	0	0	0	0	0	NA	NA	0	GAS, PIEZO	GAS, PIEZO
Gohir.A11G219200.1	NEC	EC	4.64866	9.52456e-22	1.35021e-19	PF08513	0	0	0	0	GO:0005515	0	AT5G67320	F-box-like/WD repeat-containing protein TBL1XR1-A, putative, expressed; WD-40 repeat family protein	WD-40 repeat family protein	LisH	LisH
Gohir.A08G184100.1	NEC	EC	4.64568	2.33923e-08	3.09049e-07	PF06203	0	0	0	0	GO:0005515	0	AT1G63820	CCT motif family protein, expressed; CCT motif family protein	CCT motif family protein	CCT	CCT
Gohir.A04G109200.1	NEC	EC	4.62601	1.22718e-09	2.13206e-08	0	0	0	0	0	0	0	NA	NA	0	#N/A	#N/A
Gohir.D11G158100.1	NEC	EC	4.62494	1.19138e-24	2.57281e-22	0	0	0	0	0	0	0	NA	NA	NA	#N/A	#N/A
Gohir.A11G248800.1	NEC	EC	4.61934	4.31012e-15	2.15106e-13	PF00122,PF00689,PF00702,PF00690	KOG0204	3.6.3.8	0	K01537	0	0	AT3G22910	calcium-transporting ATPase, plasma membrane-type, putative, expressed; ATPase E1-E2 type family protein / haloacid dehalogenase-like hydrolase family protein	ATPase E1-E2 type family protein / haloacid dehalogenase-like hydrolase family protein	Cation_ATPase_C, E1-E2_ATPase, Hydrolase, Cation_ATPase_N, Cation_ATPase, Hydrolase_3	Cation_ATPase_C, E1-E2_ATPase, Hydrolase, Cation_ATPase_N, Cation_ATPase, Hydrolase_3
Gohir.A13G007000.1	NEC	EC	4.61633	1.16576e-12	3.72319e-11	PF00248	KOG1577	1.1.1.21	0	0	GO:0016491,GO:0055114	0	AT5G01670	oxidoreductase, aldo/keto reductase family protein, putative, expressed; NAD(P)-linked oxidoreductase superfamily protein	NAD(P)-linked oxidoreductase superfamily protein	Aldo_ket_red	Aldo_ket_red
Gohir.D09G202200.1	NEC	EC	4.61264	0.000268571	0.00130801	PF06884	0	0	0	0	0	0	AT1G05510	DUF1264 domain containing protein, putative, expressed; Protein of unknown function (DUF1264)	Protein of unknown function (DUF1264)	DUF1264	DUF1264
Gohir.D09G204800.1	NEC	EC	4.61195	2.36835e-05	0.000152801	PF00201	KOG1192	0	0	0	GO:0016758,GO:0008152	0	AT1G06000	indole-3-acetate beta-glucosyltransferase, putative, expressed; UDP-Glycosyltransferase superfamily protein	UDP-Glycosyltransferase superfamily protein	UDPGT, U6-snRNA_bdg	UDPGT, U6-snRNA_bdg
Gohir.D13G069300.1	NEC	EC	4.61077	2.09955e-09	3.47399e-08	0	0	0	0	0	0	0	AT1G73965	expressed protein; CLAVATA3/ESR-RELATED 13	CLAVATA3/ESR-RELATED 13	#N/A	#N/A
Gohir.D02G103666.1	NEC	EC	4.6083	4.45149e-05	0.000268285	PF00122	0	3.6.3.6	SignalP-TM	0	0	0	AT5G62670	plasma membrane ATPase, putative, expressed; H(+)-ATPase 11	autoinhibited H(+)-ATPase isoform 10	E1-E2_ATPase	E1-E2_ATPase
Gohir.A05G238200.1	NEC	EC	4.60424	1.627e-06	1.40912e-05	PF00106	KOG1205	1.1.1.146	0	0	0	0	AT4G10020	oxidoreductase, short chain dehydrogenase/reductase family domain containing protein, expressed; hydroxysteroid dehydrogenase 5	hydroxysteroid dehydrogenase 5	adh_short, adh_short_C2, KR, Polysacc_synt_2, Epimerase	adh_short, adh_short_C2, KR, Polysacc_synt_2, Epimerase
Gohir.A05G105100.1	NEC	EC	4.59948	1.7366e-10	3.66295e-09	PF07714	KOG1187	2.7.11.1	SignalP-noTM	0	GO:0004672,GO:0006468	0	NA	NA	protein kinase family protein / peptidoglycan-binding LysM domain-containing protein	Pkinase_Tyr, Pkinase, LysM	Pkinase_Tyr, Pkinase, LysM
Gohir.D10G118600.1	NEC	EC	4.59601	2.67801e-13	9.745e-12	PF03127,PF00790	KOG1087	0	0	0	GO:0005622,GO:0006886	0	NA	NA	ENTH/VHS/GAT family protein	VHS, GAT, ENTH, Olduvai, HEAT_2, M11L, ANTH	VHS, GAT, ENTH, Olduvai, HEAT_2, M11L, ANTH
Gohir.A08G234200.1	NEC	EC	4.59244	3.62646e-12	1.06005e-10	PF14144	0	0	0	0	GO:0006351,GO:0043565	0	AT3G14880	transcription factor HBP-1b, putative, expressed	0	DOG1, RPN5_C, NblA	DOG1, RPN5_C, NblA
Gohir.A13G122133.1	NEC	EC	4.58924	1.39183e-08	1.92869e-07	0	0	0	0	0	0	0	NA	NA	NA	SUa-2TM	SUa-2TM
Gohir.D13G036101.1	NEC	EC	4.58352	0.00210174	0.00789033	0	0	0	0	0	0	0	NA	NA	NA	#N/A	#N/A
Gohir.D08G254600.1	NEC	EC	4.57758	5.30489e-18	4.29353e-16	PF14144	0	0	0	0	GO:0006351,GO:0043565	0	AT3G14880	transcription factor HBP-1b, putative, expressed	0	DOG1, RPN5_C	DOG1, RPN5_C
Gohir.A06G205500.1	NEC	EC	4.57696	7.33813e-10	1.35813e-08	0	0	0	SignalP-noTM	0	0	0	AT1G12064	0	0	#N/A	#N/A
Gohir.A05G399800.2	NEC	EC	4.57343	7.6121e-06	5.60882e-05	PF00293	KOG2839	0	0	K07766	GO:0016787	0	AT3G12600	hydrolase, NUDIX family, domain containing protein, expressed; nudix hydrolase homolog 16	nudix hydrolase homolog 16	NUDIX	NUDIX
Gohir.A08G210500.1	NEC	EC	4.56869	2.4045e-08	3.16406e-07	PF13561	KOG0725	0	0	0	0	0	AT1G54870	oxidoreductase, short chain dehydrogenase/reductase family protein, putative, expressed; NAD(P)-binding Rossmann-fold superfamily protein	NAD(P)-binding Rossmann-fold superfamily protein	adh_short_C2, adh_short, KR, Epimerase, DisA-linker	adh_short_C2, adh_short, KR, Epimerase, DisA-linker
Gohir.A01G142900.1	NEC	EC	4.55963	2.86857e-11	7.05149e-10	PF04770	0	0	0	0	0	0	NA	NA	homeobox protein 33	ZF-HD_dimer	ZF-HD_dimer
Gohir.A07G049400.1	NEC	EC	4.55423	4.37498e-08	5.41244e-07	PF00106	KOG1205	1.1.1.146	0	0	0	0	AT5G50770	dehydrogenase/reductase, putative, expressed; hydroxysteroid dehydrogenase 6	hydroxysteroid dehydrogenase 6	adh_short, adh_short_C2, KR, Epimerase, DUF1758, Eno-Rase_NADH_b, Polysacc_synt_2, DFP, Myco_arth_vir_N	adh_short, adh_short_C2, KR, Epimerase, DUF1758, Eno-Rase_NADH_b, Polysacc_synt_2, DFP, My
Gohir.A03G109200.2	NEC	EC	4.5539	1.2211e-23	2.24829e-21	PF01852,PF00046	0	0	0	K09338	GO:0008289,GO:0003677	0	AT1G05230	homeobox and START domains containing protein, putative, expressed; homeodomain GLABROUS 2	homeodomain GLABROUS 2	START, Homeodomain, Homeobox_KN, zf-Mss51, MRP-L20	START, Homeodomain, Homeobox_KN, zf-Mss51, MRP-L20
Gohir.D01G062500.1	NEC	EC	4.54809	3.52219e-22	5.31942e-20	PF00234	0	0	SignalP-noTM	0	0	0	NA	NA	seed storage albumin 5	Tryp_alpha_amyl, TTRAP, PNPase, WASH-7_mid, T3SS_needle_E, Prolamin_like, Gliadin	Tryp_alpha_amyl, TTRAP, PNPase, WASH-7_mid, T3SS_needle_E, Prolamin_like, Gliadin
Gohir.D06G157300.1	NEC	EC	4.53733	1.37835e-09	2.368e-08	PF03790,PF03791,PF03789,PF05920	KOG0773	0	0	0	GO:0003677,GO:0006355,GO:0005634	0	AT1G62360	Homeobox domain containing protein, expressed; KNOX/ELK homeobox transcription factor	KNOX/ELK homeobox transcription factor	KNOX1, KNOX2, Homeobox_KN, ELK, Homeodomain	KNOX1, KNOX2, Homeobox_KN, ELK, Homeodomain
Gohir.D04G040300.1	NEC	EC	4.52429	1.72323e-19	1.77762e-17	PF00304	0	0	SignalP-noTM	0	0	0	AT2G02100	DEF8 - Defensin and Defensin-like DEFL family, expressed; low-molecular-weight cysteine-rich 69	low-molecular-weight cysteine-rich 69	Gamma-thionin	Gamma-thionin
Gohir.D02G004100.2	NEC	EC	4.51588	1.0746e-06	9.69381e-06	PF13639	KOG1493	0	0	0	0	0	NA	NA	RING/U-box superfamily protein	zf-RING_2, zf-RING_11, zf-C3HC4_2, zf-rbx1, zf-C3HC4, zf-ANAPC11, FANCL_C, zf-C3HC4_3, zf-RING_5, Prok-RING_1, zf-RING_UBOX, zf-RING_4, Auto_anti-p27, zf-RING-like, zf-TFIIB, Prok-RING_4, zinc_ribbon_9, DUF1272, zf-Nse, APOBEC2, NAD2, APOBEC4_like, zf-C3HC4_4, DpnI, MIG-14_Wnt-bd, zf-LITAF-like, Zn_ribbon_17, zf-C3H2C3	zf-RING_2, zf-RING_11, zf-C3HC4_2, zf-rbx1, zf-C3HC4, zf-ANAPC11, FANCL_C, zf-C3HC4_3, zf-
Gohir.D03G099900.1	NEC	EC	4.5135	7.0745e-11	1.60659e-09	PF05553	0	0	0	0	0	0	AT5G47920	expressed protein	0	DUF761	DUF761
Gohir.A11G217600.1	NEC	EC	4.51121	0.000188325	0.000958192	PF10714	0	0	0	0	0	0	NA	NA	Late embryogenesis abundant protein, group 6	LEA_6	LEA_6
Gohir.A07G154500.1	NEC	EC	4.50461	1.86947e-07	2.02285e-06	0	0	0	SignalP-noTM	0	0	0	NA	NA	NA	#N/A	#N/A
Gohir.D06G083000.1	NEC	EC	4.50041	6.96159e-08	8.23453e-07	0	0	0	SignalP-noTM	0	0	0	AT1G02180	expressed protein; ferredoxin-related	ferredoxin-related	#N/A	#N/A
Gohir.D06G199200.1	NEC	EC	4.49688	0.000552222	0.00246794	0	0	0	0	0	0	0	NA	NA	0	#N/A	#N/A
Gohir.D09G028300.1	NEC	EC	4.49165	4.15039e-06	3.24764e-05	PF01277	0	0	0	0	GO:0016021,GO:0012511	0	AT3G01570	oleosin, putative, expressed; Oleosin family protein	Oleosin family protein	Oleosin, Phage_holin_3_6, DUF1206, DUF3487	Oleosin, Phage_holin_3_6, DUF1206, DUF3487
Gohir.A02G088800.1	NEC	EC	4.464	3.13874e-05	0.000196603	0	0	0	SignalP-noTM	0	0	0	NA	NA	0	#N/A	#N/A
Gohir.D06G053475.1	NEC	EC	4.45421	0.0255772	0.0642755	0	0	2.1.1.56	0	0	0	0	NA	NA	S-adenosyl-L-methionine-dependent methyltransferases superfamily protein	Pox_MCEL, Methyltransf_29	Pox_MCEL, Methyltransf_29
Gohir.D08G149100.1	NEC	EC	4.44959	2.89945e-15	1.47735e-13	PF13639	0	0	0	0	0	0	AT2G46160	RING-H2 finger protein ATL2M, putative, expressed; RING/U-box superfamily protein	RING/U-box superfamily protein	zf-RING_2, zf-rbx1, zf-RING_11, zf-C3HC4_2, zf-C3HC4, zf-RING_5, zf-ANAPC11, zf-RING_UBOX, RINGv, zf-C3HC4_3, Zn_ribbon_17, FANCL_C, zf-P11, zf-RING_4	zf-RING_2, zf-rbx1, zf-RING_11, zf-C3HC4_2, zf-C3HC4, zf-RING_5, zf-ANAPC11, zf-RING_UBOX,
Gohir.A03G106100.1	NEC	EC	4.44811	0.00026282	0.00128437	PF00319,PF01486	KOG0014	0	0	0	GO:0005634,GO:0006355,GO:0003677,GO:0003700,GO:0046983	0	AT1G69120	OsMADS14 - MADS-box family gene with MIKCc type-box, expressed; K-box region and MADS-box transcription factor family protein	K-box region and MADS-box transcription factor family protein	K-box, SRF-TF, CENP-K, DUF3584, FSIP1, DUF1192, TPR_MLP1_2, TMPIT, FlxA, E2F_CC-MB, CCDC-167, SlyX	K-box, SRF-TF, CENP-K, DUF3584, FSIP1, DUF1192, TPR_MLP1_2, TMPIT, FlxA, E2F_CC-MB, CCDC-1
Gohir.A08G142500.1	NEC	EC	4.44023	7.71615e-09	1.12775e-07	PF11891	0	0	0	0	0	0	AT5G12470	expressed protein; Protein of unknown function (DUF3411)	Protein of unknown function (DUF3411)	RETICULATA-like, RhlB	RETICULATA-like, RhlB
Gohir.D12G146500.1	NEC	EC	4.43999	0.00859162	0.0260332	0	0	0	0	0	0	0	NA	NA	0	#N/A	#N/A
Gohir.D13G147900.1	NEC	EC	4.43924	0.00216728	0.00809495	PF12609	0	0	0	0	0	0	AT4G10270	wound induced protein, putative, expressed; Wound-responsive family protein	Wound-responsive family protein	DUF3774	DUF3774
Gohir.A08G137400.1	NEC	EC	4.43917	5.60506e-13	1.90325e-11	PF00320	KOG1601	0	0	0	GO:0006355,GO:0003700,GO:0008270,GO:0043565	0	AT3G60530	GATA zinc finger domain containing protein, expressed; GATA transcription factor 4	GATA transcription factor 4	GATA	GATA
Gohir.D10G179200.1	NEC	EC	4.43502	1.17212e-13	4.52913e-12	0	0	0	SignalP-noTM	0	0	0	NA	NA	NA	#N/A	#N/A
Gohir.A12G190400.1	NEC	EC	4.41603	8.73027e-15	4.16798e-13	PF00403	KOG1603	0	0	0	GO:0030001,GO:0046872	0	AT5G50740	heavy metal-associated domain containing protein, expressed; Heavy metal transport/detoxification superfamily protein	Heavy metal transport/detoxification superfamily protein	HMA, zf-C2HE, SDA1	HMA, zf-C2HE, SDA1
Gohir.D12G070300.1	NEC	EC	4.41086	4.0924e-07	4.08751e-06	PF13639	0	0	0	0	0	0	NA	NA	RING/U-box superfamily protein	zf-RING_2, zf-rbx1, zf-C3HC4_2, zf-RING_11, zf-C3HC4, zf-C3HC4_3, zf-RING_UBOX, zf-ANAPC11, Zn_ribbon_17, zf-RING_5, FaeA, zf-C3HC4_4, Prok-RING_4, zf-RING-like	zf-RING_2, zf-rbx1, zf-C3HC4_2, zf-RING_11, zf-C3HC4, zf-C3HC4_3, zf-RING_UBOX, zf-ANAPC11
Gohir.A09G211300.1	NEC	EC	4.40204	1.7564e-12	5.44035e-11	PF00201	KOG1192	0	0	0	GO:0016758,GO:0008152	0	AT1G06000	indole-3-acetate beta-glucosyltransferase, putative, expressed; UDP-Glycosyltransferase superfamily protein	UDP-Glycosyltransferase superfamily protein	UDPGT, U6-snRNA_bdg	UDPGT, U6-snRNA_bdg
Gohir.D13G219900.1	NEC	EC	4.40047	2.70104e-11	6.67462e-10	0	0	0	0	0	0	0	AT3G57670	ZOS6-05 - C2H2 zinc finger protein, expressed; C2H2-type zinc finger family protein	C2H2-type zinc finger family protein	zf-C2H2, zf-C2H2_6, zf-C2H2_4, zf-C2H2_2, zf-H2C2_2, zf-C2H2_jaz, zf-C2H2_3rep, zf-LYAR	zf-C2H2, zf-C2H2_6, zf-C2H2_4, zf-C2H2_2, zf-H2C2_2, zf-C2H2_jaz, zf-C2H2_3rep, zf-LYAR
Gohir.D12G003500.1	NEC	EC	4.38888	7.33305e-07	6.888e-06	PF00190	0	0	SignalP-noTM	0	GO:0045735	0	NA	NA	cupin family protein	Cupin_1, Cupin_2, Cupin_6, AraC_binding, U79_P34, Vanabin-2, FAM176	Cupin_1, Cupin_2, Cupin_6, AraC_binding, U79_P34, Vanabin-2, FAM176
Gohir.D09G093700.1	NEC	EC	4.38435	1.2953e-06	1.14677e-05	PF04949	0	0	0	0	0	0	AT2G27740	expressed protein; Family of unknown function (DUF662)	Family of unknown function (DUF662)	Transcrip_act, Laminin_II, OmpH, Prefoldin, Phasin, Mod_r, Metal_resist, YvrJ, Ima1_N, Spc7, TMPIT, MCD_N, HIP1_clath_bdg, DUF4407, Fib_alpha, V_ATPase_I, LMBR1, HAUS6_N, DUF883, Exonuc_VII_L	Transcrip_act, Laminin_II, OmpH, Prefoldin, Phasin, Mod_r, Metal_resist, YvrJ, Ima1_N, Spc
Gohir.A10G065600.2	NEC	EC	4.38384	5.55792e-06	4.22665e-05	0	0	3.1.3.16	0	0	GO:0004722,GO:0006470	0	NA	NA	homology to ABI1	PP2C, UPF0731	PP2C, UPF0731
Gohir.A10G098900.1	NEC	EC	4.38075	1.36402e-11	3.5715e-10	PF00230	KOG0223	0	0	K09872	GO:0016020,GO:0006810,GO:0005215	0	AT4G35100	aquaporin protein, putative, expressed; plasma membrane intrinsic protein 3	plasma membrane intrinsic protein 3	MIP	MIP
Gohir.A07G154900.2	NEC	EC	4.38053	7.64561e-10	1.40827e-08	PF02362	0	0	0	0	GO:0003677	0	AT3G24650	B3 DNA binding domain containing protein, expressed; AP2/B3-like transcriptional factor family protein	AP2/B3-like transcriptional factor family protein	B3, Caudo_TAP	B3, Caudo_TAP
Gohir.D06G053851.1	NEC	EC	4.37589	3.12939e-19	3.05109e-17	0	0	0	0	0	0	0	AT2G07674	Unknown conserved protein	Unknown conserved protein	#N/A	#N/A
Gohir.D05G080700.2	NEC	EC	4.37563	2.69921e-12	8.07388e-11	PF11250	0	0	0	0	0	0	NA	NA	Chaperone DnaJ-domain superfamily protein	FAF, Stm1_N	FAF, Stm1_N
Gohir.A09G138300.2	NEC	EC	4.37217	3.25879e-11	7.9264e-10	PF00067	KOG0157	0	0	0	GO:0016705,GO:0020037,GO:0005506,GO:0055114	0	AT2G27690	cytochrome P450, putative, expressed; cytochrome P450, family 94, subfamily C, polypeptide 1	cytochrome P450, family 94, subfamily C, polypeptide 1	p450	p450
Gohir.A09G208700.1	NEC	EC	4.348	0.000181869	0.000928411	PF06884	0	0	0	0	0	0	AT1G05510	DUF1264 domain containing protein, putative, expressed; Protein of unknown function (DUF1264)	Protein of unknown function (DUF1264)	DUF1264	DUF1264
Gohir.A08G180300.1	NEC	EC	4.34455	0.00546047	0.0177599	PF00808	0	0	0	0	0	0	AT3G48590	core histone H2A/H2B/H3/H4, putative, expressed; nuclear factor Y, subunit C1	nuclear factor Y, subunit C3	CBFD_NFYB_HMF, Histone, TAF	CBFD_NFYB_HMF, Histone, TAF
Gohir.A06G051400.1	NEC	EC	4.34222	2.51643e-05	0.000161273	PF04640	0	0	0	0	0	0	AT2G12646	zinc-binding protein, putative, expressed; PLATZ transcription factor family protein	PLATZ transcription factor family protein	PLATZ, zf-B_box	PLATZ, zf-B_box
Gohir.A03G175450.1	NEC	EC	4.33879	3.93553e-05	0.000240323	0	0	0	0	0	0	0	NA	NA	NA	RVT_3, RuBisCO_small, Get5_C	RVT_3, RuBisCO_small, Get5_C
Gohir.A05G247500.2	NEC	EC	4.33393	0.00156393	0.00611105	PF00657	0	3.2.1.51	0	0	GO:0016788	0	AT3G27950	GDSL-like lipase/acylhydrolase, putative, expressed; GDSL-like Lipase/Acylhydrolase superfamily protein	GDSL-like Lipase/Acylhydrolase superfamily protein	Lipase_GDSL, Lipase_GDSL_2, PhoQ_Sensor, Nudix_hydro	Lipase_GDSL, Lipase_GDSL_2, PhoQ_Sensor, Nudix_hydro
Gohir.A02G109800.1	NEC	EC	4.32808	1.09138e-16	7.12388e-15	PF01490	KOG1303	0	0	0	0	0	AT1G77380	amino acid transporter, putative, expressed; amino acid permease 3	amino acid permease 3	Aa_trans	Aa_trans
Gohir.A12G216200.1	NEC	EC	4.3255	2.92232e-06	2.37689e-05	PF04784,PF14389	0	0	0	0	0	0	AT5G47380	ternary complex factor MIP1, putative, expressed; Protein of unknown function, DUF547	Protein of unknown function, DUF547	DUF547, Lzipper-MIP1, Mlp	DUF547, Lzipper-MIP1, Mlp
Gohir.A05G009300.1	NEC	EC	4.31838	8.11523e-11	1.82234e-09	PF00641	0	0	0	0	0	0	AT3G15680	zinc finger family protein, putative, expressed; Ran BP2/NZF zinc finger-like superfamily protein	Ran BP2/NZF zinc finger-like superfamily protein	zf-RanBP, DZR, HypA	zf-RanBP, DZR, HypA
Gohir.D05G124200.2	NEC	EC	4.31436	0.0012295	0.00496374	PF00571	KOG1764	0	0	0	0	0	AT1G15330	CBS domain containing membrane protein, putative, expressed; Cystathionine beta-synthase (CBS) protein	Cystathionine beta-synthase (CBS) protein	CBS, AbfS_sensor	CBS, AbfS_sensor
Gohir.A02G159100.2	NEC	EC	4.31415	0.000183292	0.000934742	PF04749	0	0	0	0	0	0	AT1G14870	uncharacterized Cys-rich domain containing protein, putative, expressed; PLANT CADMIUM RESISTANCE 2	PLANT CADMIUM RESISTANCE 2	PLAC8	PLAC8
Gohir.D09G084900.1	NEC	EC	4.31172	0.000376458	0.00175698	0	0	0	0	0	0	0	NA	NA	NA	LEA_4, Apolipoprotein, YtxH, DUF883, CaM_bdg_C0, LAP1C, DUF4449, ATP11	LEA_4, Apolipoprotein, YtxH, DUF883, CaM_bdg_C0, LAP1C, DUF4449, ATP11
Gohir.D12G039600.1	NEC	EC	4.31153	1.04536e-06	9.45594e-06	PF00892	0	0	0	0	GO:0016020,GO:0016021,GO:0022857	0	AT1G68170	auxin-induced protein 5NG4, putative, expressed; nodulin MtN21 /EamA-like transporter family protein	nodulin MtN21 /EamA-like transporter family protein	EamA	EamA
Gohir.A09G213654.1	NEC	EC	4.30889	2.38471e-17	1.73281e-15	PF00234	0	0	SignalP-noTM	0	0	0	AT3G08770	LTPL17 - Protease inhibitor/seed storage/LTP family protein precursor, expressed; lipid transfer protein 6	lipid transfer protein 6	Tryp_alpha_amyl, LTP_2	Tryp_alpha_amyl, LTP_2
Gohir.A01G056900.1	NEC	EC	4.30856	1.92019e-08	2.58641e-07	PF00067	KOG0157	0	0	K07437	GO:0005506,GO:0016705,GO:0020037,GO:0055114	0	AT1G12740	cytochrome P450, putative, expressed; cytochrome P450, family 87, subfamily A, polypeptide 2	cytochrome P450, family 87, subfamily A, polypeptide 2	p450	p450
Gohir.A03G217700.1	NEC	EC	4.29866	1.12313e-19	1.18774e-17	PF03140	0	0	0	0	0	0	NA	NA	Plant protein of unknown function (DUF247)	DUF247	DUF247
Gohir.D10G204800.1	NEC	EC	4.29258	2.23757e-13	8.23305e-12	PF00067	KOG0156	0	SignalP-noTM	K00517	GO:0055114,GO:0005506,GO:0016705,GO:0020037	0	AT5G04660	cytochrome P450, putative, expressed; cytochrome P450, family 77, subfamily A, polypeptide 4	cytochrome P450, family 77, subfamily A, polypeptide 4	p450, MLTR_LBD	p450, MLTR_LBD
Gohir.A11G195825.1	NEC	EC	4.29049	0.00368093	0.0127357	0	0	0	0	0	0	0	NA	NA	NA	#N/A	#N/A
Gohir.A10G197700.2	NEC	EC	4.28921	1.39371e-11	3.64509e-10	PF00067	KOG0156	0	0	0	GO:0055114,GO:0005506,GO:0020037,GO:0016705	0	AT5G04660	cytochrome P450, putative, expressed; cytochrome P450, family 77, subfamily A, polypeptide 4	cytochrome P450, family 77, subfamily A, polypeptide 4	p450, MLTR_LBD, DUF4795	p450, MLTR_LBD, DUF4795
Gohir.A04G056300.1	NEC	EC	4.28659	3.28701e-08	4.17554e-07	PF00582	0	0	0	0	GO:0006950	0	AT3G11930	universal stress protein domain containing protein, putative, expressed; Adenine nucleotide alpha hydrolases-like superfamily protein	Adenine nucleotide alpha hydrolases-like superfamily protein	Usp	Usp
Gohir.A04G016700.2	NEC	EC	4.28321	7.17485e-25	1.60183e-22	PF13639	0	0	0	0	0	0	AT3G20395	RING-H2 finger protein ATL2B, putative, expressed; RING/U-box superfamily protein	RING/U-box superfamily protein	zf-RING_2, zf-rbx1, zf-RING_11, zf-C3HC4_2, zf-C3HC4, zf-RING_UBOX, zf-ANAPC11, zf-RING_5, zf-C3HC4_3, FANCL_C, Prok-RING_4, Zn_ribbon_17, T4BSS_DotI_IcmL, Gly-zipper_Omp, RINGv, zf-RING-like, Gly-zipper_YMGG, zf-C3H2C3, Prok-RING_1, zf-RING_4	zf-RING_2, zf-rbx1, zf-RING_11, zf-C3HC4_2, zf-C3HC4, zf-RING_UBOX, zf-ANAPC11, zf-RING_5,
Gohir.A11G076600.1	NEC	EC	4.28286	3.07182e-38	3.02045e-35	PF02183,PF04618,PF00046	KOG0483	0	0	K09338	GO:0005634,GO:0043565,GO:0003677,GO:0003700,GO:0006355	0	AT3G60390	homeobox associated leucine zipper, putative, expressed; homeobox-leucine zipper protein 3	homeobox-leucine zipper protein 3	HD-ZIP_N, Homeodomain, HALZ, Homeobox_KN, NRBF2, SCHIP-1, Gmx_para_CXXCG	HD-ZIP_N, Homeodomain, HALZ, Homeobox_KN, NRBF2, SCHIP-1, Gmx_para_CXXCG
Gohir.A13G071300.1	NEC	EC	4.28216	0.000217768	0.00108999	0	0	0	0	0	0	0	AT1G73965	expressed protein; CLAVATA3/ESR-RELATED 13	CLAVATA3/ESR-RELATED 13	#N/A	#N/A
Gohir.D01G017900.1	NEC	EC	4.281	1.81939e-11	4.64282e-10	PF00642	0	0	0	0	GO:0046872	0	AT1G03790	zinc finger/CCCH transcription factor, putative, expressed; Zinc finger C-x8-C-x5-C-x3-H type family protein	Zinc finger C-x8-C-x5-C-x3-H type family protein	zf-CCCH, zf-CCCH_2, zf_CCCH_4	zf-CCCH, zf-CCCH_2, zf_CCCH_4
Gohir.D02G199150.1	NEC	EC	4.27598	0.000586078	0.00259708	0	0	0	0	0	0	0	NA	NA	NA	RVT_3, RuBisCO_small	RVT_3, RuBisCO_small
Gohir.D12G225800.1	NEC	EC	4.27471	2.48542e-19	2.47252e-17	PF08879,PF08880	0	0	0	0	GO:0005634,GO:0032502,GO:0005524,GO:0006355,GO:0006351	0	AT2G22840	growth-regulating factor, putative, expressed; growth-regulating factor 1	growth-regulating factor 2	WRC, QLQ	WRC, QLQ
Gohir.D02G189600.1	NEC	EC	4.27431	5.06046e-07	4.93488e-06	PF02893	0	0	0	0	0	0	AT5G08350	GEM, putative, expressed; GRAM domain-containing protein / ABA-responsive protein-related	GRAM domain-containing protein / ABA-responsive protein-related	GRAM	GRAM
Gohir.D12G030700.1	NEC	EC	4.27139	4.92908e-13	1.69741e-11	PF04059	0	0	0	0	0	0	NA	NA	MEI2 C-terminal RRM only like 2	RRM_2, RRM_1, PAM2	RRM_2, RRM_1, PAM2
Gohir.A07G132800.1	NEC	EC	4.27085	4.04253e-14	1.69529e-12	PF00483	KOG1322	2.7.7.27	0	K00975	GO:0016779,GO:0009058	0	AT1G27680	glucose-1-phosphate adenylyltransferase large subunit, putative, expressed; ADPGLC-PPase large subunit	ADPGLC-PPase large subunit	NTP_transferase, Fucokinase, Hexapep, NTP_transf_3, DUF4954	NTP_transferase, Fucokinase, Hexapep, NTP_transf_3, DUF4954
Gohir.D07G016700.1	NEC	EC	4.27004	3.31355e-05	0.000206257	PF02519	0	0	0	K14488	GO:0009733	0	AT3G43120	OsSAUR38 - Auxin-responsive SAUR gene family member, expressed; SAUR-like auxin-responsive protein family	SAUR-like auxin-responsive protein family	Auxin_inducible	Auxin_inducible
Gohir.D05G006100.1	NEC	EC	4.26881	4.87439e-10	9.28162e-09	PF04535	0	0	0	0	0	0	AT4G25830	membrane associated DUF588 domain containing protein, putative, expressed; Uncharacterised protein family (UPF0497)	Uncharacterised protein family (UPF0497)	DUF588, HP0268	DUF588, HP0268
Gohir.A05G221600.2	NEC	EC	4.26843	1.1782e-07	1.32836e-06	PF04770	0	0	0	0	0	0	AT4G24660	ZF-HD homeobox protein, putative, expressed; homeobox protein 22	homeobox protein 22	ZF-HD_dimer, YebG	ZF-HD_dimer, YebG
Gohir.A01G224200.1	NEC	EC	4.2532	1.26901e-08	1.77231e-07	PF06521	0	3.6.4.13	SignalP-noTM	0	0	0	AT3G54040	PAR1 protein	PAR1 protein	PAR1	PAR1
Gohir.A05G001400.1	NEC	EC	4.25272	5.22942e-10	9.93311e-09	PF03547	0	0	0	K13947	GO:0010329,GO:0010315,GO:0016021,GO:0055085	0	AT5G57090	auxin efflux carrier component, putative, expressed; Auxin efflux carrier family protein	Auxin efflux carrier family protein	Mem_trans	Mem_trans
Gohir.D08G247400.2	NEC	EC	4.25262	3.47184e-21	4.50696e-19	PF00847	0	0	0	K09285	GO:0007275,GO:0006355,GO:0003700	0	AT5G17430	AP2-like ethylene-responsive transcription factor PLETHORA 2, putative, expressed; Integrase-type DNA-binding superfamily protein	Integrase-type DNA-binding superfamily protein	AP2, RhlB	AP2, RhlB
Gohir.D07G237300.1	NEC	EC	4.24734	1.73004e-13	6.51076e-12	PF13561	KOG0725	1.1.1.184	0	0	0	0	AT3G01980	oxidoreductase, short chain dehydrogenase/reductase family protein, putative, expressed; NAD(P)-binding Rossmann-fold superfamily protein	NAD(P)-binding Rossmann-fold superfamily protein	adh_short_C2, adh_short	adh_short_C2, adh_short
Gohir.A01G184500.1	NEC	EC	4.23935	9.13474e-14	3.62052e-12	PF03195	0	0	0	0	0	0	AT1G68510	DUF260 domain containing protein, putative, expressed; LOB domain-containing protein 42	LOB domain-containing protein 42	LOB, RbsD_FucU	LOB, RbsD_FucU
Gohir.D07G052900.2	NEC	EC	4.23552	7.17076e-10	1.32981e-08	PF13589	KOG1845	0	0	0	0	0	AT5G50780	ATP-binding region, ATPase-like domain containing protein, expressed; Histidine kinase-, DNA gyrase B-, and HSP90-like ATPase family protein	Histidine kinase-, DNA gyrase B-, and HSP90-like ATPase family protein	Morc6_S5, HATPase_c_3, HATPase_c, RNase_PH_C, AAA_23, GAS, DUF4047, DUF4407, Microtub_bind, MAT1	Morc6_S5, HATPase_c_3, HATPase_c, RNase_PH_C, AAA_23, GAS, DUF4047, DUF4407, Microtub_bind
Gohir.D10G095100.1	NEC	EC	4.23177	6.46306e-07	6.14576e-06	PF02453	KOG1792	0	0	0	0	0	AT2G23640	reticulon domain containing protein, putative, expressed; Reticulan like protein B13	Reticulan like protein B13	Reticulon	Reticulon
Gohir.D12G192700.1	NEC	EC	4.22522	4.27234e-05	0.000258737	PF00403	KOG1603	0	0	0	GO:0046872,GO:0030001	0	NA	NA	Heavy metal transport/detoxification superfamily protein	HMA, zf-C2HE, SDA1	HMA, zf-C2HE, SDA1
Gohir.D06G216000.1	NEC	EC	4.21979	1.00946e-09	1.79566e-08	0	0	0	SignalP-noTM	0	0	0	AT1G12064	0	0	#N/A	#N/A
Gohir.D12G230500.1	NEC	EC	4.21716	4.69132e-07	4.61726e-06	PF03479	0	1.15.1.1	0	0	0	0	AT1G63470	AT hook motif domain containing protein, expressed; AT hook motif DNA-binding family protein	AT hook motif DNA-binding family protein	DUF296	DUF296
Gohir.A10G109650.1	NEC	EC	4.21619	8.19936e-07	7.63346e-06	PF00240	KOG0001	0	0	0	GO:0005515	0	NA	NA	polyubiquitin 10	ubiquitin, Rad60-SLD, DUF2407, Ubiquitin_5, Rad60-SLD_2, TBK1_ULD, Ubiquitin_4, PI3K_rbd, VirDNA-topo-I_N, FERM_N, MAP	ubiquitin, Rad60-SLD, DUF2407, Ubiquitin_5, Rad60-SLD_2, TBK1_ULD, Ubiquitin_4, PI3K_rbd,
Gohir.D09G015200.1	NEC	EC	4.20675	2.68934e-09	4.34868e-08	PF00249	KOG0048	0	0	K09422	0	0	AT3G47600	MYB family transcription factor, putative, expressed; myb domain protein 94	myb domain protein 96	Myb_DNA-binding, Myb_DNA-bind_6, Myb_DNA-bind_7, SLIDE	Myb_DNA-binding, Myb_DNA-bind_6, Myb_DNA-bind_7, SLIDE
Gohir.A02G160733.1	NEC	EC	4.19823	0.000571398	0.00253861	PF02362	0	0	0	0	GO:0003677	0	NA	NA	Transcriptional factor B3 family protein	B3, Cu_bind_like	B3, Cu_bind_like
Gohir.A04G119100.1	NEC	EC	4.19587	9.7357e-08	1.11727e-06	PF02704	0	0	SignalP-noTM	0	0	0	AT2G14900	GASR3 - Gibberellin-regulated GASA/GAST/Snakin family protein precursor, expressed; Gibberellin-regulated family protein	Gibberellin-regulated family protein	GASA	GASA
Gohir.A09G001700.1	NEC	EC	4.19234	1.71123e-08	2.32871e-07	PF04398	0	0	0	0	0	0	AT5G46230	DUF538 domain containing protein, putative, expressed; Protein of unknown function, DUF538	Protein of unknown function, DUF538	DUF538	DUF538
Gohir.A13G136900.1	NEC	EC	4.1902	3.21093e-09	5.10985e-08	PF12056	0	0	0	0	0	0	AT3G20300	extracellular ligand-gated ion channel, putative, expressed; Protein of unknown function (DUF3537)	Protein of unknown function (DUF3537)	DUF3537	DUF3537
Gohir.D10G012450.1	NEC	EC	4.18605	4.49085e-06	3.48514e-05	0	0	0	0	0	0	0	NA	NA	NA	kleA_kleC	kleA_kleC
Gohir.A03G054400.1	NEC	EC	4.18448	6.33147e-09	9.44782e-08	PF00106	KOG1205	1.1.1.62	0	0	0	0	AT5G50600	dehydrogenase/reductase, putative, expressed; hydroxysteroid dehydrogenase 1	hydroxysteroid dehydrogenase 1	adh_short, adh_short_C2, KR, NAD_binding_10, Polysacc_synt_2, YbjQ_1, DUF1776, Epimerase	adh_short, adh_short_C2, KR, NAD_binding_10, Polysacc_synt_2, YbjQ_1, DUF1776, Epimerase
Gohir.D04G106200.1	NEC	EC	4.18356	4.72891e-06	3.64966e-05	PF02987	0	0	0	0	0	0	NA	NA	late embryogenesis abundant protein, putative / LEA protein, putative	LEA_4, Apolipoprotein, YtxH, Mucin-like	LEA_4, Apolipoprotein, YtxH, Mucin-like
Gohir.A06G030325.1	NEC	EC	4.1822	3.73048e-06	2.95155e-05	PF13041,PF01535,PF14432	0	0	0	0	GO:0008270	0	NA	NA	Tetratricopeptide repeat (TPR)-like superfamily protein	PPR_2, PPR, PPR_3, DYW_deaminase, PPR_1, PPR_long, TPR_14, TPR_19, RPN7, BTAD, TPR_1, TPR_8, TPR_2	PPR_2, PPR, PPR_3, DYW_deaminase, PPR_1, PPR_long, TPR_14, TPR_19, RPN7, BTAD, TPR_1, TPR_
Gohir.A13G214300.1	NEC	EC	4.17856	1.49822e-17	1.12766e-15	PF11960,PF00487	0	1.14.19.6	0	K10256	GO:0055114,GO:0006629,GO:0016717	0	AT3G12120	fatty acid desaturase, putative, expressed; fatty acid desaturase 2	fatty acid desaturase 2	FA_desaturase, DUF3474	FA_desaturase, DUF3474
Gohir.A03G078600.1	NEC	EC	4.17808	3.72142e-10	7.29664e-09	PF00230	KOG0223	0	0	K09873	GO:0005215,GO:0006810,GO:0016020	0	AT1G17810	aquaporin protein, putative, expressed; beta-tonoplast intrinsic protein	beta-tonoplast intrinsic protein	MIP, Mur_ligase_C, DUF3325	MIP, Mur_ligase_C, DUF3325
Gohir.D03G175700.3	NEC	EC	4.17529	2.49502e-17	1.80445e-15	PF00046,PF01852	KOG0484	0	0	0	GO:0003677,GO:0008289	0	AT5G46880	homeobox and START domains containing protein, putative, expressed; homeobox-7	homeobox-7	START, Homeodomain, Homeobox_KN, Cupin_8, HALZ	START, Homeodomain, Homeobox_KN, Cupin_8, HALZ
Gohir.D10G232000.1	NEC	EC	4.1707	3.17826e-08	4.05962e-07	PF02535	KOG1558	0	SignalP-TM	K14709	GO:0055085,GO:0030001,GO:0016020,GO:0046873	0	AT2G04032	metal cation transporter, putative, expressed; zinc transporter 7 precursor	zinc transporter 7 precursor	Zip, GCSF	Zip, GCSF
Gohir.D11G061200.1	NEC	EC	4.17066	2.35831e-07	2.49569e-06	PF03141	0	0	0	0	GO:0008168	0	AT5G64030	methyltransferase, putative, expressed; S-adenosyl-L-methionine-dependent methyltransferases superfamily protein	S-adenosyl-L-methionine-dependent methyltransferases superfamily protein	Methyltransf_29, Methyltransf_11, Methyltransf_25, Methyltransf_23, SPW, Methyltransf_12	Methyltransf_29, Methyltransf_11, Methyltransf_25, Methyltransf_23, SPW, Methyltransf_12
Gohir.A13G196200.2	NEC	EC	4.16394	4.16477e-05	0.000252819	PF13639	0	0	0	0	0	0	NA	NA	RING-H2 finger A1A	zf-RING_2, zf-C3HC4_2, zf-C3HC4, zf-RING_UBOX, zf-rbx1, zf-RING_11, zf-RING_5, Zn_ribbon_17, zf-C3HC4_3, zf-ANAPC11, Prok-RING_4, zf-Nse, C1_1, RINGv, zf-C3HC4_4, zf-RING_4, FANCL_C	zf-RING_2, zf-C3HC4_2, zf-C3HC4, zf-RING_UBOX, zf-rbx1, zf-RING_11, zf-RING_5, Zn_ribbon_1
Gohir.A09G211000.1	NEC	EC	4.16261	6.70624e-06	5.01492e-05	PF05419	0	0	0	0	0	0	AT3G59400	uncharacterized protein ycf53, putative, expressed; enzyme binding;tetrapyrrole binding	enzyme binding;tetrapyrrole binding	GUN4, UPF0167	GUN4, UPF0167
Gohir.A02G016100.1	NEC	EC	4.16224	2.22132e-09	3.65064e-08	PF16913	0	0	0	0	GO:0016021,GO:0005215	0	AT1G30840	purine permease, putative, expressed; purine permease 4	purine permease 4	PUNUT, EamA	PUNUT, EamA
Gohir.D07G014200.2	NEC	EC	4.1606	2.92615e-17	2.08113e-15	0	0	0	0	0	0	0	NA	NA	DREB2A-interacting protein 2	RAWUL	RAWUL
Gohir.D04G061500.1	NEC	EC	4.16015	3.71963e-06	2.94398e-05	PF13417,PF13410	KOG1422	1.8.5.1	0	0	GO:0005515	0	AT1G75270	glutathione S-transferase, N-terminal domain containing protein, expressed; dehydroascorbate reductase 2	dehydroascorbate reductase 2	GST_N_3, GST_N_2, GST_C_2, GST_N, GST_C, Glutaredoxin, GST_C_3, GST_N_4, Tom37	GST_N_3, GST_N_2, GST_C_2, GST_N, GST_C, Glutaredoxin, GST_C_3, GST_N_4, Tom37
Gohir.D12G239500.1	NEC	EC	4.15899	6.07149e-10	1.13644e-08	PF03083	KOG1623	0	0	K15382	GO:0016021	0	AT4G10850	nodulin MtN3 family protein, putative, expressed; Nodulin MtN3 family protein	Nodulin MtN3 family protein	MtN3_slv, Alg14, Ribosomal_S21e, Meckelin, PQ-loop	MtN3_slv, Alg14, Ribosomal_S21e, Meckelin, PQ-loop
Gohir.D05G122000.2	NEC	EC	4.15572	7.27838e-09	1.06986e-07	0	0	0	SignalP-noTM	0	0	0	NA	NA	NA	#N/A	#N/A
Gohir.A05G258200.1	NEC	EC	4.1539	1.82076e-20	2.11978e-18	PF00847	0	0	SignalP-noTM	0	GO:0006355,GO:0003700	0	AT1G75490	AP2 domain containing protein, expressed; Integrase-type DNA-binding superfamily protein	Integrase-type DNA-binding superfamily protein	AP2	AP2
Gohir.A12G177800.1	NEC	EC	4.14926	3.57595e-08	4.50489e-07	PF02042	0	0	0	0	0	0	AT1G18790	RWP-RK domain-containing protein, putative, expressed; RWP-RK domain-containing protein	RWP-RK domain-containing protein	RWP-RK, HrpJ	RWP-RK, HrpJ
Gohir.A11G011400.1	NEC	EC	4.14559	3.43498e-09	5.42345e-08	PF02458	0	2.3.1.133	0	0	GO:0016747	0	AT5G23940	transferase family protein, putative, expressed; HXXXD-type acyl-transferase family protein	HXXXD-type acyl-transferase family protein	Transferase	Transferase
Gohir.D01G200400.1	NEC	EC	4.14462	3.68965e-12	1.07715e-10	PF00657	0	3.1.1.3	SignalP-noTM	0	GO:0016788	0	AT5G03820	GDSL-like lipase/acylhydrolase, putative, expressed; GDSL-like Lipase/Acylhydrolase family protein	GDSL-like Lipase/Acylhydrolase family protein	Lipase_GDSL	Lipase_GDSL
Gohir.D08G034700.1	NEC	EC	4.13385	1.81587e-08	2.45951e-07	PF01148	KOG1440	2.7.7.41	0	K00981	0	0	AT4G22340	phosphatidate cytidylyltransferase, putative, expressed; cytidinediphosphate diacylglycerol synthase 2	cytidinediphosphate diacylglycerol synthase 2	CTP_transf_1, Csm1_B, DUF373	CTP_transf_1, Csm1_B, DUF373
Gohir.D04G133600.1	NEC	EC	4.12755	0.0046557	0.0155092	PF01161	0	0	0	K06910	0	0	AT5G01300	phosphatidylethanolamine-binding protein, putative, expressed; PEBP (phosphatidylethanolamine-binding protein) family protein	PEBP (phosphatidylethanolamine-binding protein) family protein	PBP	PBP
Gohir.A03G000036.1	NEC	EC	4.11865	9.70121e-19	8.6886e-17	PF00046,PF01852	KOG0484	0	0	0	GO:0003677,GO:0008289	0	AT5G46880	homeobox and START domains containing protein, putative, expressed; homeobox-7	homeobox-7	START, Homeodomain, Homeobox_KN, Cupin_8, HALZ	START, Homeodomain, Homeobox_KN, Cupin_8, HALZ
Gohir.D08G199100.1	NEC	EC	4.11711	4.90051e-05	0.00029234	PF00808	0	0	0	0	0	0	AT3G48590	core histone H2A/H2B/H3/H4, putative, expressed; nuclear factor Y, subunit C1	nuclear factor Y, subunit C4	CBFD_NFYB_HMF, Histone, TAF	CBFD_NFYB_HMF, Histone, TAF
Gohir.A07G075100.1	NEC	EC	4.113	1.01095e-07	1.15491e-06	PF14009	0	0	0	0	0	0	AT3G03280	expressed protein	0	DUF4228	DUF4228
Gohir.A01G070400.1	NEC	EC	4.11206	2.62302e-07	2.73574e-06	PF11883,PF07714,PF01453,PF08276,PF00954	KOG1187	2.7.11.1	SignalP-noTM	0	GO:0048544,GO:0004674,GO:0004672,GO:0006468	0	AT4G27300	serine/threonine-protein kinase receptor precursor, putative, expressed; S-locus lectin protein kinase family protein	S-locus lectin protein kinase family protein	Pkinase_Tyr, Pkinase, B_lectin, S_locus_glycop, PAN_2, DUF3403, APH, PAN_1, EB, PAN_3, LapA_dom, Haspin_kinase	Pkinase_Tyr, Pkinase, B_lectin, S_locus_glycop, PAN_2, DUF3403, APH, PAN_1, EB, PAN_3, Lap
Gohir.A03G217600.1	NEC	EC	4.10483	1.44954e-14	6.626e-13	0	0	0	0	0	0	0	AT4G19980	expressed protein	0	#N/A	#N/A
Gohir.D04G175172.1	NEC	EC	4.10266	4.56442e-05	0.000274269	0	0	0	0	0	0	0	NA	NA	NA	#N/A	#N/A
Gohir.D05G021140.1	NEC	EC	4.10059	4.89412e-08	5.98985e-07	0	0	0	0	0	0	0	NA	NA	NA	#N/A	#N/A
Gohir.A08G040700.1	NEC	EC	4.09758	3.04171e-09	4.86568e-08	PF00170	0	0	0	0	GO:0006355,GO:0003700	0	AT3G62420	expressed protein; basic region/leucine zipper motif 53	basic region/leucine zipper motif 53	bZIP_1, bZIP_2, ZapB, Sec34, DUF4763, bZIP_Maf, GalP_UDP_transf, BBS2_C	bZIP_1, bZIP_2, ZapB, Sec34, DUF4763, bZIP_Maf, GalP_UDP_transf, BBS2_C
Gohir.D11G154300.1	NEC	EC	4.09459	2.5751e-06	2.12966e-05	PF03016	0	2.4.2.41	0	0	GO:0006486,GO:0016757	0	AT5G03795	exostosin family protein, putative, expressed; Exostosin family protein	Exostosin family protein	Exostosin	Exostosin
Gohir.A05G157800.2	NEC	EC	4.0918	3.04954e-14	1.31766e-12	PF00046	0	0	0	0	GO:0003677	0	AT2G33880	homeobox domain containing protein, expressed; homeobox-3	homeobox-3	Homeodomain, SUIM_assoc, DUF1635, CDK2AP	Homeodomain, SUIM_assoc, DUF1635, CDK2AP
Gohir.D04G098600.1	NEC	EC	4.08865	3.40056e-10	6.71023e-09	0	0	0	0	0	0	0	AT3G52610	0	0	#N/A	#N/A
Gohir.D11G233200.1	NEC	EC	4.07717	0.00313144	0.0111081	PF00722,PF06955	0	2.4.1.207	0	0	GO:0005618,GO:0016762,GO:0048046,GO:0006073,GO:0004553,GO:0005975	0	AT4G25810	glycosyl hydrolases family 16, putative, expressed; xyloglucan endotransglycosylase 6	xyloglucan endotransglycosylase 6	Glyco_hydro_16, XET_C, DUF4995	Glyco_hydro_16, XET_C, DUF4995
Gohir.A09G095200.1	NEC	EC	4.07485	2.49855e-10	5.06567e-09	PF00170	0	0	0	K14432	GO:0006355,GO:0003700	0	AT3G44460	bZIP transcription factor, putative, expressed; Basic-leucine zipper (bZIP) transcription factor family protein	Basic-leucine zipper (bZIP) transcription factor family protein	bZIP_1, bZIP_2, bZIP_Maf, TMEM247, DUF3015, HAUS6_N	bZIP_1, bZIP_2, bZIP_Maf, TMEM247, DUF3015, HAUS6_N
Gohir.A08G077800.1	NEC	EC	4.07441	0.00025498	0.00125118	0	0	0	0	0	0	0	NA	NA	0	#N/A	#N/A
Gohir.D06G050500.1	NEC	EC	4.07431	8.3563e-15	4.01016e-13	PF04640	0	0	0	0	0	0	AT2G12646	zinc-binding protein, putative, expressed; PLATZ transcription factor family protein	PLATZ transcription factor family protein	PLATZ, zf-B_box	PLATZ, zf-B_box
Gohir.D07G191600.1	NEC	EC	4.07002	5.31554e-10	1.00801e-08	PF07983	0	0	0	0	0	0	NA	NA	Carbohydrate-binding X8 domain superfamily protein	X8	X8
Gohir.D08G197660.1	NEC	EC	4.06885	1.97287e-07	2.1233e-06	PF13178	0	0	0	0	0	0	NA	NA	IQ-domain 22	DUF4005	DUF4005
Gohir.A02G067500.1	NEC	EC	4.06612	0.0191752	0.0507394	0	0	0	0	0	0	0	NA	NA	0	VGLL4, Mor	VGLL4, Mor
Gohir.A12G093625.1	NEC	EC	4.06569	7.00157e-10	1.29948e-08	PF13085,PF13534	KOG3049	1.3.5.1	0	K00235	GO:0009055,GO:0051536	0	AT5G65165	succinate dehydrogenase and fumarate reductase iron-sulfur protein, expressed; succinate dehydrogenase 2-3	succinate dehydrogenase 2-3	Fer2_3, Fer4_17, Fer4_8, Fer4_10, Fer4_7, DUF2610, Fer2, Fer4_16	Fer2_3, Fer4_17, Fer4_8, Fer4_10, Fer4_7, DUF2610, Fer2, Fer4_16
Gohir.D10G142800.1	NEC	EC	4.06557	1.24534e-11	3.28495e-10	0	0	0	SignalP-noTM	0	0	0	NA	NA	NA	#N/A	#N/A
Gohir.A11G070300.1	NEC	EC	4.06484	0.000683701	0.00296937	0	0	0	SignalP-noTM	0	0	0	NA	NA	0	#N/A	#N/A
Gohir.D04G011566.1	NEC	EC	4.05517	0.000546403	0.00244566	0	0	0	0	0	0	0	NA	NA	NA	#N/A	#N/A
Gohir.A03G008900.2	NEC	EC	4.05499	1.71654e-06	1.4789e-05	PF00056,PF02866	KOG1495	1.1.1.27	0	0	GO:0016491,GO:0016616,GO:0055114	0	AT4G17260	lactate/malate dehydrogenase, putative, expressed; Lactate/malate dehydrogenase family protein	Lactate/malate dehydrogenase family protein	Ldh_1_N, Ldh_1_C, Glyco_hydro_4	Ldh_1_N, Ldh_1_C, Glyco_hydro_4
Gohir.A03G015602.1	NEC	EC	4.04826	0.00126617	0.0050931	PF00847	0	0	0	0	GO:0003700,GO:0006355	0	AT5G51990	dehydration-responsive element-binding protein, putative, expressed; C-repeat-binding factor 4	C-repeat-binding factor 4	AP2	AP2
Gohir.D10G086500.1	NEC	EC	4.04806	0.00175292	0.0067519	0	0	0	0	0	0	0	AT5G40460	expressed protein	0	#N/A	#N/A
Gohir.A12G185100.1	NEC	EC	4.0471	0.038449	0.0901558	PF03088	KOG1520	4.3.3.2	0	0	GO:0016844,GO:0009058	0	NA	NA	strictosidine synthase 2	Str_synth, SGL, NHL	Str_synth, SGL, NHL
Gohir.D02G017500.1	NEC	EC	4.0449	2.4627e-12	7.42892e-11	PF16913	0	0	0	0	GO:0016021,GO:0005215	0	AT1G30840	purine permease, putative, expressed; purine permease 4	purine permease 4	PUNUT, EamA	PUNUT, EamA
Gohir.A05G226700.1	NEC	EC	4.04473	4.9049e-12	1.40009e-10	0	0	0	0	0	0	0	AT1G78170	expressed protein	0	Spt4	Spt4
Gohir.A11G278000.2	NEC	EC	4.04292	8.66366e-08	1.00599e-06	PF00646	0	0	0	0	GO:0005515	0	NA	NA	F-box family protein	F-box, F-box-like, Gemini_AL1_M	F-box, F-box-like, Gemini_AL1_M
Gohir.A04G079200.1	NEC	EC	4.0402	3.90053e-13	1.37288e-11	PF09713	0	3.4.17.23	0	0	0	0	AT5G02580	plant-specific domain TIGR01589 family protein, expressed; Plant protein 1589 of unknown function	Plant protein 1589 of unknown function	A_thal_3526	A_thal_3526
Gohir.D10G020700.1	NEC	EC	4.03963	5.29158e-06	4.04742e-05	PF02140,PF01301	KOG0496	3.2.1.145	SignalP-noTM	0	GO:0030246,GO:0005975,GO:0004553	0	AT2G28470	beta-galactosidase precursor, putative, expressed; beta-galactosidase 8	beta-galactosidase 8	Glyco_hydro_35, GHD, Gal_Lectin, Glyco_hydro_42, BetaGal_dom4_5	Glyco_hydro_35, GHD, Gal_Lectin, Glyco_hydro_42, BetaGal_dom4_5
Gohir.D11G099400.1	NEC	EC	4.03574	1.39326e-05	9.56309e-05	PF00847	0	0	0	0	GO:0003700,GO:0006355	0	NA	NA	cytokinin response factor 6	AP2	AP2
Gohir.D04G131050.1	NEC	EC	4.03212	8.33087e-06	6.06973e-05	PF14383	0	0	0	0	0	0	NA	NA	ALC-interacting protein 1	VARLMGL	VARLMGL
Gohir.A01G211600.1	NEC	EC	4.03167	1.18001e-21	1.65251e-19	PF00657	0	3.1.1.3	SignalP-noTM	0	GO:0016788	0	AT5G03820	GDSL-like lipase/acylhydrolase, putative, expressed; GDSL-like Lipase/Acylhydrolase family protein	GDSL-like Lipase/Acylhydrolase family protein	Lipase_GDSL	Lipase_GDSL
Gohir.A12G033200.1	NEC	EC	4.03112	3.31245e-09	5.25693e-08	PF00892	0	0	0	0	GO:0016020,GO:0016021,GO:0022857	0	AT1G68170	auxin-induced protein 5NG4, putative, expressed; nodulin MtN21 /EamA-like transporter family protein	nodulin MtN21 /EamA-like transporter family protein	EamA	EamA
Gohir.A11G210433.1	NEC	EC	4.02993	1.05782e-06	9.55365e-06	0	0	0	SignalP-noTM	0	0	0	NA	NA	Fasciclin-like arabinogalactan family protein	#N/A	#N/A
Gohir.A07G205900.1	NEC	EC	4.02591	2.43961e-05	0.000156916	PF01357,PF03330	0	0	SignalP-noTM	0	0	0	AT3G29030	expansin precursor, putative, expressed; expansin A5	expansin A5	Pollen_allerg_1, DPBB_1	Pollen_allerg_1, DPBB_1
Gohir.A03G000037.1	NEC	EC	4.02417	2.10649e-19	2.12553e-17	PF00046,PF01852	KOG0484	0	0	0	GO:0008289,GO:0003677	0	AT5G46880	homeobox and START domains containing protein, putative, expressed; homeobox-7	homeobox-7	START, Homeodomain, Homeobox_KN, Cupin_8, HALZ	START, Homeodomain, Homeobox_KN, Cupin_8, HALZ
Gohir.A08G157700.1	NEC	EC	4.02407	2.28549e-11	5.72164e-10	PF03760	0	0	0	0	GO:0009793	0	NA	NA	Late embryogenesis abundant protein, group 1 protein	LEA_1, DUF2040, DUF515, Lectin_N, Atg14, DUF2570, MEA1, DUF1664	LEA_1, DUF2040, DUF515, Lectin_N, Atg14, DUF2570, MEA1, DUF1664
Gohir.A13G093800.2	NEC	EC	4.02026	7.21146e-06	5.34629e-05	PF01852,PF00046	0	0	0	K09338	GO:0003677,GO:0008289	0	AT1G05230	homeobox and START domains containing protein, putative, expressed; homeodomain GLABROUS 2	homeodomain GLABROUS 2	START, Homeodomain, Homeobox_KN, YabA, MRP-L20, zf_Rg, zf-Mss51, NRBF2, PikAIV_N	START, Homeodomain, Homeobox_KN, YabA, MRP-L20, zf_Rg, zf-Mss51, NRBF2, PikAIV_N
Gohir.D07G048200.1	NEC	EC	4.01978	1.97496e-12	6.06855e-11	PF01277	0	0	0	0	GO:0012511,GO:0016021	0	AT4G25140	oleosin, putative, expressed; oleosin 1	oleosin 1	Oleosin, DUF4389	Oleosin, DUF4389
Gohir.A07G217000.1	NEC	EC	4.01525	5.57981e-23	9.51533e-21	PF00005,PF00664	KOG0055	3.6.3.44	0	K05658	GO:0042626,GO:0016021,GO:0016887,GO:0055085,GO:0006810,GO:0005524	0	AT3G28345	multidrug resistance protein, putative, expressed; ABC transporter family protein	ABC transporter family protein	ABC_membrane, ABC_tran, SMC_N, AAA_29, AAA_15, Zeta_toxin, AAA_30, AAA_16, RsgA_GTPase, AAA_22, AAA_21, G-alpha, AAA_25, SbcCD_C, ABC_ATPase, AAA_23, AAA_7, DLIC, MMR_HSR1, AAA_5, AAA_24, AAA_18, APS_kinase, Ploopntkinase3, DUF87, AAA_33, DUF815, NB-ARC, NACHT	ABC_membrane, ABC_tran, SMC_N, AAA_29, AAA_15, Zeta_toxin, AAA_30, AAA_16, RsgA_GTPase, AA
Gohir.A11G111000.1	NEC	EC	4.01446	2.92711e-17	2.08113e-15	PF07816	0	0	0	0	0	0	AT3G62630	expressed protein; Protein of unknown function (DUF1645)	Protein of unknown function (DUF1645)	DUF1645	DUF1645
Gohir.D10G153600.1	NEC	EC	4.01348	1.246e-07	1.39899e-06	PF03080,PF14365	0	0	0	0	0	0	AT5G50150	carboxyl-terminal peptidase, putative, expressed; Protein of Unknown Function (DUF239)	Protein of Unknown Function (DUF239)	Neprosin, Neprosin_AP	Neprosin, Neprosin_AP
Gohir.A13G132600.1	NEC	EC	4.01186	4.46696e-09	6.87432e-08	PF00808	KOG0869	0	0	0	0	0	AT1G21970	histone-like transcription factor and archaeal histone, putative, expressed; Histone superfamily protein	Histone superfamily protein	CBFD_NFYB_HMF, Histone, TFIID-18kDa, Bromo_TP, CENP-T_C, TAF	CBFD_NFYB_HMF, Histone, TFIID-18kDa, Bromo_TP, CENP-T_C, TAF
Gohir.D06G021600.1	NEC	EC	4.00939	9.81272e-09	1.40354e-07	0	0	0	0	0	0	0	AT1G27461	expressed protein	0	#N/A	#N/A
Gohir.A07G233200.2	NEC	EC	4.00301	3.10508e-06	2.50971e-05	PF00069	KOG1187	2.7.11.1	0	0	GO:0005524,GO:0006468,GO:0004672	0	AT2G24370	serine threonine kinase, putative, expressed; Protein kinase protein with adenine nucleotide alpha hydrolases-like domain	Protein kinase protein with adenine nucleotide alpha hydrolases-like domain	Pkinase, Pkinase_Tyr, Haspin_kinase, APH	Pkinase, Pkinase_Tyr, Haspin_kinase, APH
Gohir.A08G180200.2	NEC	EC	4.00261	0.00514163	0.0168845	0	0	0	0	0	0	0	NA	NA	0	#N/A	#N/A
Gohir.D11G081800.1	NEC	EC	4.00211	2.56079e-06	2.11821e-05	PF04749	0	0	0	0	0	0	AT2G45010	uncharacterized Cys-rich domain containing protein, putative, expressed; PLAC8 family protein	PLAC8 family protein	PLAC8	PLAC8
Gohir.D11G188100.1	NEC	EC	4.00035	2.62865e-06	2.16852e-05	PF00257	0	0	0	0	GO:0009415,GO:0006950	0	NA	NA	Dehydrin family protein	Dehydrin, Sporozoite_P67	Dehydrin, Sporozoite_P67
Gohir.D13G098000.1	NEC	EC	3.99987	3.15908e-06	2.54699e-05	PF00125	KOG1744	0	0	0	GO:0003677,GO:0000786	0	AT2G28720	OsFBO1 - F-box and other domain containing protein, expressed; Histone superfamily protein	Histone superfamily protein	Histone, CBFD_NFYB_HMF, YscO-like, TFIID_20kDa, 4HB_MCP_1, RP-C, Ribosomal_L12	Histone, CBFD_NFYB_HMF, YscO-like, TFIID_20kDa, 4HB_MCP_1, RP-C, Ribosomal_L12
Gohir.A04G046720.1	NEC	EC	3.99798	0.000124111	0.000664377	PF00067	0	1.14.13.121	0	0	GO:0055114,GO:0005506,GO:0016705,GO:0020037	0	AT3G26330	cytochrome P450 71E1, putative, expressed; cytochrome P450, family 71, subfamily B, polypeptide 37	ytochrome p450, family 71, subfamily B, polypeptide 11	p450	p450
Gohir.D10G183100.1	NEC	EC	3.99781	3.20659e-07	3.27998e-06	PF02518,PF10436	KOG0787	2.7.11.2	0	K00898	0	0	AT3G06483	kinase, putative, expressed; pyruvate dehydrogenase kinase	pyruvate dehydrogenase kinase	BCDHK_Adom3, HATPase_c, HATPase_c_3, DUF677	BCDHK_Adom3, HATPase_c, HATPase_c_3, DUF677
Gohir.D11G093800.1	NEC	EC	3.99614	2.17803e-10	4.48954e-09	PF07690	KOG2532	0	0	0	GO:0055085,GO:0016021	0	AT4G00370	transporter, major facilitator family, putative, expressed; Major facilitator superfamily protein	Major facilitator superfamily protein	MFS_1, OATP	MFS_1, OATP
Gohir.D04G067100.1	NEC	EC	3.99528	1.42212e-16	9.15348e-15	PF01490	KOG1303	0	0	K13946	0	0	AT2G38120	transmembrane amino acid transporter protein, putative, expressed; Transmembrane amino acid transporter family protein	Transmembrane amino acid transporter family protein	Aa_trans, DUF2516	Aa_trans, DUF2516
Gohir.A08G011600.1	NEC	EC	3.98864	7.60201e-25	1.68904e-22	PF14368	0	0	SignalP-noTM	0	0	0	AT1G55260	LTPL82 - Protease inhibitor/seed storage/LTP family protein precursor, expressed; Bifunctional inhibitor/lipid-transfer protein/seed storage 2S albumin superfamily protein	Bifunctional inhibitor/lipid-transfer protein/seed storage 2S albumin superfamily protein	LTP_2, Tryp_alpha_amyl	LTP_2, Tryp_alpha_amyl
Gohir.D05G316700.2	NEC	EC	3.98776	2.19315e-06	1.84784e-05	PF01569	KOG3030	3.1.3.4	0	0	0	0	AT3G02600	lipid phosphatase protein, putative, expressed; lipid phosphate phosphatase 3	lipid phosphate phosphatase 3	PAP2, PAP2_3, CcmH, FtsX, 7TMR-DISM_7TM	PAP2, PAP2_3, CcmH, FtsX, 7TMR-DISM_7TM
Gohir.D10G231100.1	NEC	EC	3.98733	3.8731e-13	1.3653e-11	PF02535	KOG1558	0	SignalP-TM	K14709	GO:0055085,GO:0030001,GO:0016020,GO:0046873	0	AT2G04032	metal cation transporter, putative, expressed; zinc transporter 7 precursor	zinc transporter 7 precursor	Zip, GCSF	Zip, GCSF
Gohir.A07G164600.1	NEC	EC	3.98393	5.98434e-08	7.17593e-07	PF00403	KOG1603	0	0	0	GO:0030001,GO:0046872	0	NA	NA	Heavy metal transport/detoxification superfamily protein	HMA, DUF5643	HMA, DUF5643
Gohir.D08G227300.1	NEC	EC	3.98373	2.45635e-08	3.22861e-07	PF13561	KOG0725	0	0	0	0	0	AT1G54870	oxidoreductase, short chain dehydrogenase/reductase family protein, putative, expressed; NAD(P)-binding Rossmann-fold superfamily protein	NAD(P)-binding Rossmann-fold superfamily protein	adh_short_C2, adh_short, KR, Epimerase	adh_short_C2, adh_short, KR, Epimerase
Gohir.D08G184700.1	NEC	EC	3.98171	7.21956e-22	1.03616e-19	PF02458	0	2.3.1.162	0	0	GO:0016747	0	AT5G02890	transferase family protein, putative, expressed; HXXXD-type acyl-transferase family protein	HXXXD-type acyl-transferase family protein	Transferase	Transferase
Gohir.D13G093400.1	NEC	EC	3.97875	9.30612e-06	6.70143e-05	0	0	0	0	0	0	0	NA	NA	0	#N/A	#N/A
Gohir.D05G033100.1	NEC	EC	3.97821	1.22594e-14	5.6883e-13	PF00069	KOG0605	2.7.11.1	0	0	GO:0006468,GO:0004672,GO:0005524	0	AT4G33080	AGC_AGC_other_NDRh_TRCd.1 - ACG kinases include homologs to PKA, PKG and PKC, expressed; AGC (cAMP-dependent, cGMP-dependent and protein kinase C) kinase family protein	AGC (cAMP-dependent, cGMP-dependent and protein kinase C) kinase family protein	Pkinase, Pkinase_Tyr, APH, Kinase-like, Seadorna_VP7, Pkinase_C, Haspin_kinase, Kdo, Pox_ser-thr_kin	Pkinase, Pkinase_Tyr, APH, Kinase-like, Seadorna_VP7, Pkinase_C, Haspin_kinase, Kdo, Pox_s
Gohir.A09G127800.1	NEC	EC	3.97229	4.12082e-08	5.12347e-07	PF03760	0	0	0	0	GO:0009793	0	NA	NA	Late Embryogenesis Abundant 4-5	LEA_1	LEA_1
Gohir.A01G059900.1	NEC	EC	3.97206	0.000259343	0.0012703	PF10252	KOG3375	0	0	0	0	0	AT5G46020	heat- and acid-stable phosphoprotein, putative, expressed	0	PP28, Spt5_N	PP28, Spt5_N
Gohir.A01G019200.1	NEC	EC	3.9698	8.51684e-05	0.000477435	PF00642	0	0	0	0	GO:0046872	0	AT1G03790	zinc finger/CCCH transcription factor, putative, expressed; Zinc finger C-x8-C-x5-C-x3-H type family protein	Zinc finger C-x8-C-x5-C-x3-H type family protein	zf-CCCH, zf_CCCH_4, zf-CCCH_2, Torus	zf-CCCH, zf_CCCH_4, zf-CCCH_2, Torus
Gohir.D13G047100.2	NEC	EC	3.96133	3.5942e-07	3.64259e-06	PF05903	KOG0324	0	0	0	0	0	AT1G47740	ethylene-responsive element-binding protein, putative, expressed; PPPDE putative thiol peptidase family protein	PPPDE putative thiol peptidase family protein	Peptidase_C97, LRAT	Peptidase_C97, LRAT
Gohir.A09G144300.1	NEC	EC	3.96005	4.59359e-08	5.65649e-07	PF00201	KOG1192	0	0	K13496	GO:0016758,GO:0008152	0	AT2G36780	flavonol-3-O-glycoside-7-O-glucosyltransferase 1, putative, expressed; UDP-Glycosyltransferase superfamily protein	UDP-glucosyl transferase 73C2	UDPGT	UDPGT
Gohir.D09G094900.1	NEC	EC	3.95559	9.75423e-12	2.62388e-10	PF00170	0	0	0	0	GO:0006355,GO:0003700	0	NA	NA	Basic-leucine zipper (bZIP) transcription factor family protein	bZIP_1, bZIP_2, bZIP_Maf, TMEM247, HAUS6_N	bZIP_1, bZIP_2, bZIP_Maf, TMEM247, HAUS6_N
Gohir.D04G037100.1	NEC	EC	3.95435	4.51537e-05	0.000271675	0	0	0	SignalP-noTM	0	0	0	NA	NA	protodermal factor 1	#N/A	#N/A
Gohir.D12G026900.1	NEC	EC	3.95427	1.36162e-07	1.51739e-06	PF00168,PF12357,PF13091,PF00614	KOG1329	3.1.4.4	0	K01115	GO:0003824	0	AT4G35790	phospholipase D, putative, expressed; phospholipase D delta	phospholipase D delta	PLD_C, C2, PLDc, PLDc_2	PLD_C, C2, PLDc, PLDc_2
Gohir.D07G053800.1	NEC	EC	3.94642	9.05508e-06	6.53555e-05	PF00106	KOG1205	1.1.1.146	0	0	0	0	AT5G50770	dehydrogenase/reductase, putative, expressed; hydroxysteroid dehydrogenase 6	hydroxysteroid dehydrogenase 6	adh_short, adh_short_C2, KR	adh_short, adh_short_C2, KR
Gohir.D05G163300.1	NEC	EC	3.94542	2.19486e-10	4.52221e-09	PF02701	0	0	0	0	GO:0006355,GO:0003677	0	NA	NA	Dof-type zinc finger DNA-binding family protein	zf-Dof, zf-SNAP50_C, DUF4881	zf-Dof, zf-SNAP50_C, DUF4881
Gohir.D09G214700.1	NEC	EC	3.94106	0.000289568	0.00139659	PF14368	0	0	SignalP-noTM	0	0	0	AT3G08770	LTPL17 - Protease inhibitor/seed storage/LTP family protein precursor, expressed; lipid transfer protein 6	lipid transfer protein 6	Tryp_alpha_amyl, LTP_2	Tryp_alpha_amyl, LTP_2
Gohir.A10G017500.1	NEC	EC	3.93844	0.000112314	0.000609213	PF01397,PF03936	0	4.2.3.48	0	0	GO:0010333,GO:0016829,GO:0008152,GO:0000287	K15086	AT1G61680	terpene synthase, putative, expressed; terpene synthase 14	terpene synthase 14	Terpene_synth_C, Terpene_synth	Terpene_synth_C, Terpene_synth
Gohir.D09G005800.1	NEC	EC	3.9329	1.01891e-06	9.24923e-06	PF00415	KOG1427	0	0	0	GO:0010224,GO:0009881,GO:0042803	0	AT5G63860	Regulator of chromosome condensation domain containing protein, expressed; Regulator of chromosome condensation (RCC1) family protein	Regulator of chromosome condensation (RCC1) family protein	RCC1, RCC1_2, DUF346	RCC1, RCC1_2, DUF346
Gohir.D11G137100.1	NEC	EC	3.93266	5.33862e-14	2.19111e-12	PF04564,PF00514	0	6.3.2.19	0	0	GO:0016567,GO:0005515,GO:0004842	0	AT3G54790	armadillo/beta-catenin repeat family protein, putative, expressed; ARM repeat superfamily protein	ARM repeat superfamily protein	Arm, U-box, HEAT_2, DUF713, DUF383	Arm, U-box, HEAT_2, DUF713, DUF383
Gohir.A06G072600.1	NEC	EC	3.92965	6.35604e-10	1.1873e-08	0	0	0	0	0	0	0	AT5G56880	expressed protein	0	#N/A	#N/A
Gohir.A11G188800.2	NEC	EC	3.92962	2.0132e-08	2.69831e-07	PF02362	0	0	0	0	GO:0003677	0	NA	NA	AP2/B3-like transcriptional factor family protein	B3, Peptidase_S24	B3, Peptidase_S24
Gohir.D05G254000.1	NEC	EC	3.92874	0.00013964	0.00073626	PF00657	0	3.1.1.3	SignalP-noTM	0	GO:0016788	0	AT1G71691	GDSL-like lipase/acylhydrolase, putative, expressed; GDSL-like Lipase/Acylhydrolase superfamily protein	GDSL-like Lipase/Acylhydrolase superfamily protein	Lipase_GDSL	Lipase_GDSL
Gohir.D10G085300.1	NEC	EC	3.92845	1.95467e-11	4.95519e-10	PF07859	KOG1515	3.1.1.1	0	0	GO:0008152,GO:0016787	0	AT3G27320	CXE carboxylesterase, putative, expressed; alpha/beta-Hydrolases superfamily protein	alpha/beta-Hydrolases superfamily protein	Abhydrolase_3, COesterase, DUF1205	Abhydrolase_3, COesterase, DUF1205
Gohir.A10G005800.1	NEC	EC	3.92468	1.1189e-11	2.97519e-10	PF03106	0	0	0	0	GO:0006355,GO:0003700,GO:0043565	0	AT1G30650	WRKY37, expressed; WRKY DNA-binding protein 14	WRKY DNA-binding protein 14	WRKY, FLYWCH	WRKY, FLYWCH
Gohir.A07G034736.1	NEC	EC	3.92462	0.000110068	0.000598788	PF02362	0	0	0	0	GO:0003677	0	NA	NA	Transcriptional factor B3 family protein	B3, Cu_bind_like	B3, Cu_bind_like
Gohir.D13G228200.1	NEC	EC	3.91885	6.70777e-08	7.96283e-07	PF02450	0	2.3.1.20	0	0	GO:0008374,GO:0006629	0	AT3G44830	lecithine cholesterol acyltransferase, putative, expressed; Lecithin:cholesterol acyltransferase family protein	Lecithin:cholesterol acyltransferase family protein	LCAT, Lipase_2	LCAT, Lipase_2
Gohir.D13G121100.1	NEC	EC	3.9186	7.23083e-06	5.3535e-05	0	0	0	0	0	0	0	NA	NA	0	#N/A	#N/A
Gohir.D13G121201.1	NEC	EC	3.9186	7.23083e-06	5.3535e-05	0	0	0	0	0	0	0	NA	NA	0	#N/A	#N/A
Gohir.D13G121301.1	NEC	EC	3.9186	7.23083e-06	5.3535e-05	0	0	0	0	0	0	0	NA	NA	0	#N/A	#N/A
Gohir.D13G121400.1	NEC	EC	3.9186	7.23083e-06	5.3535e-05	0	0	0	0	0	0	0	NA	NA	0	#N/A	#N/A
Gohir.D13G121500.1	NEC	EC	3.9186	7.23083e-06	5.3535e-05	0	0	0	0	0	0	0	NA	NA	0	#N/A	#N/A
Gohir.D13G121601.1	NEC	EC	3.9186	7.23083e-06	5.3535e-05	0	0	0	0	0	0	0	NA	NA	0	#N/A	#N/A
Gohir.D13G121700.1	NEC	EC	3.9186	7.23083e-06	5.3535e-05	0	0	0	0	0	0	0	NA	NA	0	#N/A	#N/A
Gohir.D13G238066.1	NEC	EC	3.91809	1.38635e-07	1.54037e-06	0	0	0	0	0	0	0	NA	NA	ABC transporter family protein	#N/A	#N/A
Gohir.D09G170700.1	NEC	EC	3.91645	5.11098e-16	2.99745e-14	PF01161	KOG3346	0	0	0	0	0	AT1G18100	osMFT1 MFT-Like1 homologous to Mother of FT and TFL1 gene; contains Pfam profile PF01161: Phosphatidylethanolamine-binding protein, expressed; PEBP (phosphatidylethanolamine-binding protein) family protein	PEBP (phosphatidylethanolamine-binding protein) family protein	PBP	PBP
Gohir.A12G261650.1	NEC	EC	3.91595	3.08066e-09	4.91947e-08	PF00107	0	1.1.1.14	0	K00008	GO:0055114	0	AT5G51970	dehydrogenase, putative, expressed; GroES-like zinc-binding alcohol dehydrogenase family protein	GroES-like zinc-binding alcohol dehydrogenase family protein	ADH_zinc_N, ADH_zinc_N_2, Glu_dehyd_C	ADH_zinc_N, ADH_zinc_N_2, Glu_dehyd_C
Gohir.A04G130800.1	NEC	EC	3.91582	3.25016e-09	5.16693e-08	PF00249	0	0	0	0	0	0	AT4G39250	MYB family transcription factor, putative, expressed; RAD-like 1	RAD-like 6	Myb_DNA-binding, Myb_DNA-bind_6	Myb_DNA-binding, Myb_DNA-bind_6
Gohir.D10G075800.1	NEC	EC	3.91445	0.00477632	0.0158482	PF17181	0	0	SignalP-TM	0	0	0	NA	NA	0	EPF	EPF
Gohir.D06G022100.1	NEC	EC	3.91397	5.99281e-07	5.74231e-06	PF06404	0	0	SignalP-noTM	0	GO:0008083,GO:0008283,GO:0005576	0	AT3G49780	phytosulfokines precursor, putative, expressed; phytosulfokine 4 precursor	phytosulfokine 4 precursor	PSK	PSK
Gohir.A01G047900.1	NEC	EC	3.91336	8.18319e-12	2.23114e-10	PF00924	KOG4629	0	0	0	GO:0016020,GO:0055085	0	AT1G78610	uncharacterized mscS family protein, putative, expressed; mechanosensitive channel of small conductance-like 6	mechanosensitive channel of small conductance-like 6	MS_channel, CPP1-like	MS_channel, CPP1-like
Gohir.A01G002800.2	NEC	EC	3.91069	0.000510355	0.00230081	0	0	0	0	0	0	0	NA	NA	0	#N/A	#N/A
Gohir.D04G014200.1	NEC	EC	3.90788	0.000904352	0.0037946	0	0	0	0	0	0	0	AT1G05575	expressed protein	0	DUF2705	DUF2705
Gohir.A13G059700.1	NEC	EC	3.90767	1.28383e-11	3.38067e-10	PF03169	0	0	0	0	GO:0055085	0	AT1G65730	YELLOW STRIPE like 7	YELLOW STRIPE like 7	OPT, TMEM65	OPT, TMEM65
Gohir.D07G079625.1	NEC	EC	3.90521	4.55287e-06	3.52922e-05	PF01554	KOG1347	0	0	0	GO:0055085,GO:0006855,GO:0015238,GO:0015297,GO:0016020	0	AT2G04050	MATE efflux family protein, putative, expressed; MATE efflux family protein	MATE efflux family protein	MatE, TMEM51	MatE, TMEM51
Gohir.D13G218000.3	NEC	EC	3.90267	1.229e-07	1.38069e-06	PF00487,PF11960	0	1.14.19.6	0	K10256	GO:0016717,GO:0006629,GO:0055114	0	AT3G12120	fatty acid desaturase, putative, expressed; fatty acid desaturase 2	fatty acid desaturase 2	FA_desaturase, DUF3474	FA_desaturase, DUF3474
Gohir.D07G053700.1	NEC	EC	3.89874	0.000697415	0.00302008	PF00106	KOG1205	1.1.1.146	0	0	0	0	AT5G50770	dehydrogenase/reductase, putative, expressed; hydroxysteroid dehydrogenase 6	hydroxysteroid dehydrogenase 6	adh_short, adh_short_C2, KR, Epimerase, DUF1758, Eno-Rase_NADH_b, DFP, Myco_arth_vir_N	adh_short, adh_short_C2, KR, Epimerase, DUF1758, Eno-Rase_NADH_b, DFP, Myco_arth_vir_N
Gohir.A13G058400.1	NEC	EC	3.89796	5.2793e-08	6.41877e-07	PF03514	0	0	0	0	0	0	AT3G49950	GRAS family transcription factor domain containing protein, expressed; GRAS family transcription factor	GRAS family transcription factor	GRAS	GRAS
Gohir.D13G029100.9	NEC	EC	3.89758	4.97421e-07	4.86206e-06	PF02782,PF00370	0	2.7.1.30	0	0	GO:0005975,GO:0016773	0	AT2G21370	expressed protein; xylulose kinase-1	xylulose kinase-1	FGGY_N, FGGY_C, BcrAD_BadFG	FGGY_N, FGGY_C, BcrAD_BadFG
Gohir.D11G092300.3	NEC	EC	3.89573	1.59994e-05	0.000107973	PF03479	0	0	0	0	0	0	AT3G61310	AT hook motif domain containing protein, expressed; AT hook motif DNA-binding family protein	AT hook motif DNA-binding family protein	DUF296, AT_hook	DUF296, AT_hook
Gohir.A06G032652.1	NEC	EC	3.89528	0.000111355	0.000604934	PF04770	0	0	0	0	0	0	NA	NA	homeobox protein 22	ZF-HD_dimer	ZF-HD_dimer
Gohir.D03G175800.1	NEC	EC	3.89187	3.19372e-22	4.85509e-20	PF01852,PF00046	KOG0484	0	0	0	GO:0008289,GO:0003677	0	AT5G46880	homeobox and START domains containing protein, putative, expressed; homeobox-7	homeobox-7	START, Homeodomain, Homeobox_KN, Cupin_8, HALZ	START, Homeodomain, Homeobox_KN, Cupin_8, HALZ
Gohir.A07G125100.1	NEC	EC	3.89017	0.000698889	0.00302505	PF00847	0	0	0	K09285	GO:0007275,GO:0003700,GO:0006355	0	AT1G51190	AP2/EREBP transcription factor BABY BOOM, putative, expressed; Integrase-type DNA-binding superfamily protein	Integrase-type DNA-binding superfamily protein	AP2	AP2
Gohir.A12G027700.1	NEC	EC	3.88399	0.00186544	0.0071212	PF00111	0	0	0	K02639	GO:0051536,GO:0009055	0	AT1G10960	2Fe-2S iron-sulfur cluster binding domain containing protein, expressed; ferredoxin 1	2Fe-2S ferredoxin-like superfamily protein	Fer2	Fer2
Gohir.A09G213658.1	NEC	EC	3.88251	4.18905e-07	4.17676e-06	PF08387	0	0	0	0	0	0	NA	NA	F-box/RNI-like/FBD-like domains-containing protein	FBD, LRR_4, Fer2_3	FBD, LRR_4, Fer2_3
Gohir.D09G202100.1	NEC	EC	3.88242	0.00143561	0.00567683	PF06884	0	0	0	0	0	0	AT1G05510	DUF1264 domain containing protein, putative, expressed; Protein of unknown function (DUF1264)	Protein of unknown function (DUF1264)	DUF1264	DUF1264
Gohir.A08G129000.1	NEC	EC	3.88035	9.53023e-05	0.000527524	PF01988	KOG4473	0	0	0	0	0	NA	NA	vacuolar iron transporter 1	VIT1	VIT1
Gohir.A12G083366.1	NEC	EC	3.8792	9.74095e-10	1.74281e-08	0	0	0	0	0	0	0	AT4G39900	expressed protein	0	#N/A	#N/A
Gohir.D07G031700.1	NEC	EC	3.87289	7.41572e-06	5.47548e-05	0	0	0	0	0	0	0	AT3G45200	expressed protein	0	#N/A	#N/A
Gohir.A10G029000.1	NEC	EC	3.87237	1.69704e-07	1.85057e-06	PF00046	0	0	0	0	GO:0003677	0	AT2G33880	homeobox domain containing protein, expressed; homeobox-3	homeobox-3	Homeodomain, MAS20, HJURP_mid	Homeodomain, MAS20, HJURP_mid
Gohir.D13G043300.5	NEC	EC	3.86946	2.58762e-15	1.34063e-13	0	0	0	0	0	0	0	AT3G19500	bHelix-loop-helix transcription factor, putative, expressed; basic helix-loop-helix (bHLH) DNA-binding superfamily protein	basic helix-loop-helix (bHLH) DNA-binding superfamily protein	Tom22, HLH	Tom22, HLH
Gohir.D07G038300.2	NEC	EC	3.86825	2.60434e-05	0.000166354	PF02362	0	0	0	0	GO:0003677	0	NA	NA	Transcriptional factor B3 family protein	B3, Cu_bind_like	B3, Cu_bind_like
Gohir.D13G201400.2	NEC	EC	3.86743	0.000289807	0.00139745	PF13639	0	0	0	0	0	0	NA	NA	RING/U-box superfamily protein	zf-RING_2, zf-C3HC4_2, zf-rbx1, zf-RING_UBOX, zf-C3HC4, zf-RING_11, zf-RING_5, Prok-RING_4, zf-C3HC4_3, Zn_ribbon_17, zf-RING_4, zf-ANAPC11, RINGv, C1_1, FANCL_C, zf-Nse, zf-C3HC4_4, zf-RING_6, zf-RING-like, zf-C3H2C3, Prok-RING_1	zf-RING_2, zf-C3HC4_2, zf-rbx1, zf-RING_UBOX, zf-C3HC4, zf-RING_11, zf-RING_5, Prok-RING_4
Gohir.D13G045800.1	NEC	EC	3.86235	1.7982e-11	4.59634e-10	PF02458	0	0	0	0	GO:0016747	0	NA	NA	HXXXD-type acyl-transferase family protein	Transferase, NAD_binding_4	Transferase, NAD_binding_4
Gohir.D07G037900.2	NEC	EC	3.86234	0.00869401	0.026269	0	0	0	SignalP-noTM	0	0	0	NA	NA	0	SLR1-BP	SLR1-BP
Gohir.D01G093400.2	NEC	EC	3.85888	5.90084e-12	1.65675e-10	PF04783,PF04782	0	0	0	0	0	0	NA	NA	Protein of unknown function (DUF630 and DUF632)	DUF632, DUF630, Sod_Ni, UPF0113_N, VioE	DUF632, DUF630, Sod_Ni, UPF0113_N, VioE
Gohir.A13G036650.1	NEC	EC	3.85758	0.00820867	0.0250433	PF02362	0	0	0	0	GO:0003677	0	NA	NA	AP2/B3-like transcriptional factor family protein	B3, FRP, DUF313	B3, FRP, DUF313
Gohir.A05G290900.1	NEC	EC	3.85728	1.4919e-24	3.14824e-22	0	0	0	0	0	0	0	NA	NA	0	DUF3045, DUF5487	DUF3045, DUF5487
Gohir.D04G047032.1	NEC	EC	3.85186	0.00569927	0.0183839	0	0	0	0	0	0	0	NA	NA	NA	#N/A	#N/A
Gohir.A03G124900.1	NEC	EC	3.85018	8.925e-07	8.2278e-06	PF01486,PF00319	KOG0014	0	0	0	GO:0003677,GO:0003700,GO:0046983,GO:0006355,GO:0005634	0	AT1G24260	OsMADS8 - MADS-box family gene with MIKCc type-box, expressed; K-box region and MADS-box transcription factor family protein	K-box region and MADS-box transcription factor family protein	SRF-TF, K-box	SRF-TF, K-box
Gohir.A10G093100.1	NEC	EC	3.84574	2.51618e-09	4.09736e-08	PF02453	KOG1792	0	0	0	0	0	AT2G23640	reticulon domain containing protein, putative, expressed; Reticulan like protein B13	Reticulan like protein B13	Reticulon, DUF3367	Reticulon, DUF3367
Gohir.D08G077000.1	NEC	EC	3.84252	8.81997e-05	0.000492516	PF12481	0	0	0	0	0	0	AT5G19140	stem-specific protein TSJT1, putative, expressed; Aluminium induced protein with YGL and LRDR motifs	Aluminium induced protein with YGL and LRDR motifs	DUF3700, GATase_7, GATase_6	DUF3700, GATase_7, GATase_6
Gohir.A09G115000.1	NEC	EC	3.84059	2.00437e-07	2.15569e-06	PF00847	0	0	0	0	GO:0007275,GO:0003700,GO:0006355	0	AT1G51190	AP2/EREBP transcription factor BABY BOOM, putative, expressed; Integrase-type DNA-binding superfamily protein	Integrase-type DNA-binding superfamily protein	AP2	AP2
Gohir.A13G189050.1	NEC	EC	3.83764	0.154654	0.271087	0	0	0	0	0	0	0	NA	NA	NA	Chromo_shadow	Chromo_shadow
Gohir.A11G077400.1	NEC	EC	3.83731	2.708e-07	2.81611e-06	PF04749	0	0	0	0	0	0	AT2G45010	uncharacterized Cys-rich domain containing protein, putative, expressed; PLAC8 family protein	PLAC8 family protein	PLAC8	PLAC8
Gohir.D03G166200.1	NEC	EC	3.8366	1.82157e-10	3.82645e-09	PF05553	0	0	0	0	0	0	NA	NA	hydroxyproline-rich glycoprotein family protein	DUF761	DUF761
Gohir.A10G026900.1	NEC	EC	3.83626	9.43613e-08	1.08667e-06	0	0	0	0	0	0	0	NA	NA	NA	YtxH, DUF883, ApoLp-III, LEA_4, Apolipoprotein, Mitofilin, HSP9_HSP12, Prominin, Alanine_zipper, ATP-synt_B	YtxH, DUF883, ApoLp-III, LEA_4, Apolipoprotein, Mitofilin, HSP9_HSP12, Prominin, Alanine_z
Gohir.D11G192900.1	NEC	EC	3.83494	1.56499e-10	3.3271e-09	PF00046	KOG0483	0	0	K09338	GO:0003677	0	AT4G36740	homeobox domain containing protein, expressed; homeobox protein 40	homeobox protein 40	Homeodomain, Homeobox_KN, Pox_MCEL, HALZ, Phage_Nu1, Terminase_5, QueC, DUF489, Prominin, FlaC_arch, HTH_28, DivIC, Fungal_TACC, TMF_TATA_bd, SPT6_acidic, TMF_DNA_bd	Homeodomain, Homeobox_KN, Pox_MCEL, HALZ, Phage_Nu1, Terminase_5, QueC, DUF489, Prominin,
Gohir.A13G117900.1	NEC	EC	3.83435	1.27506e-05	8.84636e-05	0	0	0	0	0	0	0	NA	NA	0	#N/A	#N/A
Gohir.A09G175400.1	NEC	EC	3.82838	1.17013e-07	1.32022e-06	PF01161	KOG3346	0	0	0	0	0	AT1G18100	osMFT1 MFT-Like1 homologous to Mother of FT and TFL1 gene; contains Pfam profile PF01161: Phosphatidylethanolamine-binding protein, expressed; PEBP (phosphatidylethanolamine-binding protein) family protein	PEBP (phosphatidylethanolamine-binding protein) family protein	PBP	PBP
Gohir.D07G017200.1	NEC	EC	3.82653	3.05221e-12	9.04198e-11	PF00010	0	0	0	0	GO:0046983	0	NA	NA	LJRHL1-like 3	HLH, DUF5042, CDK2AP	HLH, DUF5042, CDK2AP
Gohir.A06G082880.1	NEC	EC	3.82479	3.84227e-18	3.17083e-16	PF00924	0	0	0	0	GO:0055085,GO:0016020	0	AT5G12080	uncharacterized mscS family protein, putative, expressed; mechanosensitive channel of small conductance-like 10	mechanosensitive channel of small conductance-like 10	MS_channel, Bunya_G2	MS_channel, Bunya_G2
Gohir.D05G280500.2	NEC	EC	3.82423	0.00208748	0.00784698	PF00067	KOG0156	1.14.13.124	0	0	GO:0005506,GO:0020037,GO:0016705,GO:0055114	0	AT5G05260	cytochrome P450, putative, expressed; cytochrome p450 79a2	cytochrome p450 79a2	p450	p450
Gohir.A10G123200.1	NEC	EC	3.82091	4.111e-09	6.39253e-08	0	0	0	SignalP-noTM	0	0	0	NA	NA	NA	#N/A	#N/A
Gohir.A07G230400.1	NEC	EC	3.82088	2.8024e-07	2.90773e-06	PF02362	0	0	0	0	GO:0003677	0	AT3G26790	B3 DNA binding domain containing protein, expressed; AP2/B3-like transcriptional factor family protein	AP2/B3-like transcriptional factor family protein	B3, SR-25, DUF2577	B3, SR-25, DUF2577
Gohir.A03G046700.1	NEC	EC	3.81967	3.24509e-13	1.15895e-11	0	0	0	0	0	0	0	NA	NA	0	Pep1_7, DUF4367	Pep1_7, DUF4367
Gohir.D05G252700.1	NEC	EC	3.81957	1.61428e-07	1.7674e-06	PF13347	KOG0637	0	0	K15378	0	0	AT1G71880	sucrose transporter, putativ, expressed; sucrose-proton symporter 1	sucrose-proton symporter 2	MFS_2, DctQ	MFS_2, DctQ
Gohir.A13G047500.1	NEC	EC	3.81789	5.7363e-16	3.32619e-14	PF02458	0	0	0	0	GO:0016747	0	AT1G03940	transferase family protein, putative, expressed; HXXXD-type acyl-transferase family protein	HXXXD-type acyl-transferase family protein	Transferase, TMEM192	Transferase, TMEM192
Gohir.D08G178000.1	NEC	EC	3.81021	1.33228e-06	1.17634e-05	PF03760	0	0	0	0	GO:0009793	0	NA	NA	Late embryogenesis abundant protein, group 1 protein	LEA_1, DUF515, MMR1, Lectin_N, DUF2040, Rsc14, Atg14, DUF2570, DUF1664, MEA1, OmpH, Neur_chan_memb, Bac_small_YrzI	LEA_1, DUF515, MMR1, Lectin_N, DUF2040, Rsc14, Atg14, DUF2570, DUF1664, MEA1, OmpH, Neur_c
Gohir.A08G108900.1	NEC	EC	3.8068	9.61862e-15	4.57791e-13	PF14226,PF03171	KOG0143	1.14.11.9	0	0	GO:0016491,GO:0055114	0	AT4G10490	naringenin,2-oxoglutarate 3-dioxygenase, putative, expressed; 2-oxoglutarate (2OG) and Fe(II)-dependent oxygenase superfamily protein	2-oxoglutarate (2OG) and Fe(II)-dependent oxygenase superfamily protein	2OG-FeII_Oxy, DIOX_N	2OG-FeII_Oxy, DIOX_N
Gohir.D13G143950.1	NEC	EC	3.80584	8.22491e-06	6.00223e-05	PF04998	0	2.7.7.6	0	0	GO:0006351,GO:0003899,GO:0003677	0	ATCG00170	DNA-directed RNA polymerase subunit beta, putative, expressed; DNA-directed RNA polymerase family protein	DNA-directed RNA polymerase family protein	RNA_pol_Rpb1_5, Peptidase_M23, MBG	RNA_pol_Rpb1_5, Peptidase_M23, MBG
Gohir.A09G002000.2	NEC	EC	3.80339	7.55957e-26	1.96269e-23	PF01061,PF06422	0	0	0	0	GO:0016021,GO:0042626,GO:0016020,GO:0005524,GO:0006810	0	AT1G53270	ABC-2 type transporter domain containing protein, expressed; ABC-2 type transporter family protein	ABC-2 type transporter family protein	ABC2_membrane, PDR_CDR, ABC2_membrane_3	ABC2_membrane, PDR_CDR, ABC2_membrane_3
Gohir.A05G005300.1	NEC	EC	3.803	1.11701e-13	4.33431e-12	PF04535	0	0	0	0	0	0	AT4G25830	membrane associated DUF588 domain containing protein, putative, expressed; Uncharacterised protein family (UPF0497)	Uncharacterised protein family (UPF0497)	DUF588, HP0268	DUF588, HP0268
Gohir.D07G169400.1	NEC	EC	3.80222	7.93958e-09	1.15711e-07	PF03016	KOG1021	2.4.2.41	0	0	GO:0006486,GO:0016757	0	AT5G03795	exostosin family protein, putative, expressed; Exostosin family protein	Exostosin family protein	Exostosin, Flag1_repress	Exostosin, Flag1_repress
Gohir.D04G160800.1	NEC	EC	3.80164	0.0342049	0.0817979	PF02704	0	0	SignalP-noTM	0	0	0	AT2G14900	GASR3 - Gibberellin-regulated GASA/GAST/Snakin family protein precursor, expressed; Gibberellin-regulated family protein	Gibberellin-regulated family protein	GASA	GASA
Gohir.A05G176400.1	NEC	EC	3.80085	1.54294e-07	1.69533e-06	PF00808	0	0	0	0	0	0	AT5G47670	histone-like transcription factor and archaeal histone, putative, expressed; nuclear factor Y, subunit B6	nuclear factor Y, subunit B6	CBFD_NFYB_HMF, Histone, Bromo_TP, TFIID-18kDa, CENP-T_C, TAF	CBFD_NFYB_HMF, Histone, Bromo_TP, TFIID-18kDa, CENP-T_C, TAF
Gohir.D12G219832.1	NEC	EC	3.79992	9.73213e-06	6.98169e-05	0	0	0	SignalP-noTM	0	0	0	NA	NA	0	#N/A	#N/A
Gohir.D02G118600.1	NEC	EC	3.79862	4.35591e-11	1.03351e-09	PF00230	KOG0223	0	0	K09873	GO:0006810,GO:0005215,GO:0016020	0	AT1G17810	aquaporin protein, putative, expressed; beta-tonoplast intrinsic protein	beta-tonoplast intrinsic protein	MIP, Mur_ligase_C, DUF3325	MIP, Mur_ligase_C, DUF3325
Gohir.D12G128950.1	NEC	EC	3.79408	3.34191e-11	8.11596e-10	PF00072	0	2.7.13.3	0	0	GO:0000160	0	NA	NA	Signal transduction histidine kinase	Response_reg	Response_reg
Gohir.A02G050300.1	NEC	EC	3.788	3.27218e-09	5.19898e-08	PF04570	0	0	0	0	0	0	NA	NA	Protein of unknown function (DUF581)	zf-FLZ, VATC	zf-FLZ, VATC
Gohir.D13G136000.1	NEC	EC	3.78731	2.36566e-08	3.12005e-07	PF00808	KOG0869	0	0	0	0	0	AT1G21970	histone-like transcription factor and archaeal histone, putative, expressed; Histone superfamily protein	Histone superfamily protein	CBFD_NFYB_HMF, Histone, TFIID-18kDa, Bromo_TP, CENP-T_C, TAF	CBFD_NFYB_HMF, Histone, TFIID-18kDa, Bromo_TP, CENP-T_C, TAF
Gohir.D11G080800.1	NEC	EC	3.78532	3.54985e-06	2.82023e-05	PF00046,PF02183,PF04618	KOG0483	0	0	K09338	GO:0006355,GO:0003677,GO:0003700,GO:0005634,GO:0043565	0	AT3G60390	homeobox associated leucine zipper, putative, expressed; homeobox-leucine zipper protein 3	homeobox-leucine zipper protein 3	HD-ZIP_N, Homeodomain, HALZ, Homeobox_KN, NRBF2, YabA, bZIP_1, CHDCT2	HD-ZIP_N, Homeodomain, HALZ, Homeobox_KN, NRBF2, YabA, bZIP_1, CHDCT2
Gohir.D03G161200.1	NEC	EC	3.78494	1.40115e-06	1.23024e-05	PF04640	0	0	0	0	0	0	AT3G60670	zinc-binding protein, putative, expressed; PLATZ transcription factor family protein	PLATZ transcription factor family protein	PLATZ, Ecl1, zf-B_box	PLATZ, Ecl1, zf-B_box
Gohir.A11G329600.1	NEC	EC	3.78307	3.28428e-06	2.63644e-05	PF00686	0	2.7.9.5	0	0	GO:2001070	0	NA	NA	Carbohydrate-binding-like fold	CBM_20, Peptidase_S11	CBM_20, Peptidase_S11
Gohir.D02G239700.2	NEC	EC	3.78292	1.82099e-20	2.11978e-18	0	0	0	0	0	0	0	AT4G19980	expressed protein	0	#N/A	#N/A
Gohir.D12G275600.2	NEC	EC	3.78259	3.16316e-14	1.35984e-12	0	0	0	0	0	0	0	AT5G62960	expressed protein	0	#N/A	#N/A
Gohir.D05G229400.1	NEC	EC	3.78108	0.000980311	0.00407484	0	0	0	0	0	0	0	AT1G78170	expressed protein	0	Spt4	Spt4
Gohir.D05G077700.1	NEC	EC	3.78076	1.47336e-09	2.51346e-08	PF00335	KOG3882	0	0	0	GO:0016021	0	AT5G60220	tetraspanin family protein, putative, expressed; tetraspanin4	tetraspanin3	Tetraspanin, Ion_trans, DUF2207, DUF809, DUF3328, LRR19-TM, TMEMspv1-c74-12, DUF4330, TssO, Cyt_c_ox_IV, DUF4131	Tetraspanin, Ion_trans, DUF2207, DUF809, DUF3328, LRR19-TM, TMEMspv1-c74-12, DUF4330, TssO
Gohir.A05G290400.1	NEC	EC	3.77972	1.11481e-06	1.00077e-05	PF09258	KOG1022	2.4.1.225	0	0	GO:0016021,GO:0016757	0	AT5G04500	exostosin, putative, expressed; glycosyltransferase family protein 47	glycosyltransferase family protein 47	Glyco_transf_64, Glyco_hydro_43, Deltameth_res, LCE	Glyco_transf_64, Glyco_hydro_43, Deltameth_res, LCE
Gohir.D13G005300.1	NEC	EC	3.77877	7.39772e-12	2.04022e-10	PF03195	0	0	0	0	0	0	AT2G40470	DUF260 domain containing protein, putative, expressed; LOB domain-containing protein 15	LOB domain-containing protein 15	LOB	LOB
Gohir.A07G075000.1	NEC	EC	3.7778	2.40799e-08	3.16775e-07	PF01554	KOG1347	0	0	K03327	GO:0016020,GO:0015297,GO:0015238,GO:0006855,GO:0055085	0	AT2G04050	MATE efflux family protein, putative, expressed; MATE efflux family protein	MATE efflux family protein	MatE, TMEM51	MatE, TMEM51
Gohir.D03G064000.1	NEC	EC	3.77654	2.99982e-07	3.09796e-06	PF04844	0	0	0	0	0	0	NA	NA	ovate family protein 14	Ovate, M20_dimer, Peptidase_S32	Ovate, M20_dimer, Peptidase_S32
Gohir.D09G231700.2	NEC	EC	3.77283	5.64077e-07	5.43315e-06	PF05512	0	0	0	0	0	0	AT1G04560	AWPM-19-like membrane family protein, putative, expressed; AWPM-19-like family protein	AWPM-19-like family protein	AWPM-19, DUF418	AWPM-19, DUF418
Gohir.A08G025100.1	NEC	EC	3.77208	1.21178e-07	1.36356e-06	PF00808	KOG0869	0	0	0	0	0	NA	NA	Histone superfamily protein	CBFD_NFYB_HMF, Histone, Bromo_TP, TFIID-18kDa, CENP-T_C, ChaC	CBFD_NFYB_HMF, Histone, Bromo_TP, TFIID-18kDa, CENP-T_C, ChaC
Gohir.D12G029900.1	NEC	EC	3.76979	0.0024653	0.00905583	PF00257	0	0	0	0	GO:0006950,GO:0009415	0	NA	NA	dehydrin LEA	Dehydrin, RHS, DUF2733, FancD2	Dehydrin, RHS, DUF2733, FancD2
Gohir.D13G019500.1	NEC	EC	3.76884	3.72458e-05	0.000228954	PF08137	0	0	0	0	0	0	NA	NA	NA	DVL	DVL
Gohir.D05G179300.1	NEC	EC	3.7687	6.5023e-05	0.0003752	PF00808	0	0	0	0	0	0	AT5G47670	histone-like transcription factor and archaeal histone, putative, expressed; nuclear factor Y, subunit B6	nuclear factor Y, subunit B6	CBFD_NFYB_HMF, Histone, Bromo_TP, TFIID-18kDa, CENP-T_C, TAF	CBFD_NFYB_HMF, Histone, Bromo_TP, TFIID-18kDa, CENP-T_C, TAF
Gohir.D08G269000.1	NEC	EC	3.76857	2.03782e-08	2.72816e-07	PF13178,PF00612	0	0	0	0	GO:0005515	0	AT2G26180	IQ calmodulin-binding motif domain containing protein, expressed; IQ-domain 6	IQ-domain 6	DUF4005, IQ	DUF4005, IQ
Gohir.D11G060100.1	NEC	EC	3.76578	9.55533e-10	1.71625e-08	PF01501	KOG1950	2.4.1.17	0	0	GO:0016757,GO:0015020,GO:0009834,GO:0005794,GO:0045492	0	AT3G18660	glycosyl transferase, putative, expressed; plant glycogenin-like starch initiation protein 1	plant glycogenin-like starch initiation protein 1	Glyco_transf_8, Nucleotid_trans	Glyco_transf_8, Nucleotid_trans
Gohir.A12G040100.1	NEC	EC	3.76535	6.38711e-07	6.08229e-06	0	0	0	0	0	0	0	AT4G38810	EF hand family protein, putative, expressed; Calcium-binding EF-hand family protein	Calcium-binding EF-hand family protein	WIYLD, EF-hand_1, EF-hand_8	WIYLD, EF-hand_1, EF-hand_8
Gohir.D12G052900.1	NEC	EC	3.76303	0.0275834	0.0684323	0	0	0	0	0	0	0	NA	NA	0	#N/A	#N/A
Gohir.A05G074900.1	NEC	EC	3.76264	5.30911e-10	1.0072e-08	PF00335	KOG3882	0	0	0	GO:0016021	0	AT5G60220	tetraspanin family protein, putative, expressed; tetraspanin4	tetraspanin3	Tetraspanin, Ion_trans, DUF2207, Ac76, DUF3328, DUF809, LRR19-TM, DUF4330, TssO, Sigma_reg_N	Tetraspanin, Ion_trans, DUF2207, Ac76, DUF3328, DUF809, LRR19-TM, DUF4330, TssO, Sigma_reg
Gohir.D05G001700.1	NEC	EC	3.76019	2.23755e-10	4.60014e-09	PF03547	0	0	0	K13947	GO:0055085,GO:0010315,GO:0010329,GO:0016021	0	AT5G57090	auxin efflux carrier component, putative, expressed; Auxin efflux carrier family protein	Auxin efflux carrier family protein	Mem_trans	Mem_trans
Gohir.A05G173100.1	NEC	EC	3.75663	0.00242917	0.0089409	PF03789,PF05920,PF03790,PF03791	KOG0773	0	0	0	GO:0005634,GO:0003677,GO:0006355	0	AT1G62360	Homeobox domain containing protein, expressed; KNOX/ELK homeobox transcription factor	KNOX/ELK homeobox transcription factor	KNOX1, Homeobox_KN, KNOX2, ELK, Homeodomain	KNOX1, Homeobox_KN, KNOX2, ELK, Homeodomain
Gohir.A03G030500.1	NEC	EC	3.75505	5.70508e-10	1.07439e-08	PF00403	KOG1603	0	0	0	GO:0046872,GO:0030001	0	AT5G60800	heavy metal-associated domain containing protein, expressed; Heavy metal transport/detoxification superfamily protein	Heavy metal transport/detoxification superfamily protein	HMA, FmiP_Thoc5, E7, RuvB_C, BON, DUF2757	HMA, FmiP_Thoc5, E7, RuvB_C, BON, DUF2757
Gohir.A05G254400.1	NEC	EC	3.75264	1.8158e-07	1.97216e-06	PF01277	0	0	0	0	GO:0012511,GO:0016021	0	AT3G01570	oleosin, putative, expressed; Oleosin family protein	Oleosin family protein	Oleosin	Oleosin
Gohir.D07G237600.1	NEC	EC	3.75247	2.19442e-07	2.33994e-06	PF02362	0	0	0	0	GO:0003677	0	AT3G26790	B3 DNA binding domain containing protein, expressed; AP2/B3-like transcriptional factor family protein	AP2/B3-like transcriptional factor family protein	B3, DUF2577	B3, DUF2577
Gohir.D13G096525.1	NEC	EC	3.75028	8.01655e-06	5.86755e-05	PF02544	KOG1640	1.3.1.94	0	0	GO:0005737,GO:0016627,GO:0016021,GO:0006629	0	AT2G16530	3-oxo-5-alpha-steroid 4-dehydrogenase, putative, expressed; 3-oxo-5-alpha-steroid 4-dehydrogenase family protein	3-oxo-5-alpha-steroid 4-dehydrogenase family protein	Steroid_dh, PEMT	Steroid_dh, PEMT
Gohir.D05G282332.1	NEC	EC	3.7496	3.98459e-07	3.99704e-06	PF02714,PF14703	0	0	0	0	GO:0016020	0	AT3G54510	early-responsive to dehydration protein-related, putative, expressed; Early-responsive to dehydration stress protein (ERD4)	Early-responsive to dehydration stress protein (ERD4)	RSN1_7TM, PHM7_cyt, Tetraspanin	RSN1_7TM, PHM7_cyt, Tetraspanin
Gohir.A06G209400.1	NEC	EC	3.74737	5.28604e-07	5.13212e-06	PF05212	0	0	0	0	0	0	AT1G61240	lysine ketoglutarate reductase trans-splicing related 1, putative, expressed; Protein of unknown function (DUF707)	Protein of unknown function (DUF707)	DUF707, DUF1917	DUF707, DUF1917
Gohir.A01G060200.1	NEC	EC	3.74591	6.78442e-16	3.88038e-14	0	0	0	0	0	0	0	AT3G15095	expressed protein	0	Utp14	Utp14
Gohir.D01G191700.1	NEC	EC	3.74477	8.82878e-07	8.15049e-06	0	0	0	0	0	0	0	NA	NA	embryo sac development arrest 12	LEM	LEM
Gohir.A08G136400.1	NEC	EC	3.73818	1.24553e-09	2.16069e-08	PF04640	0	0	0	0	0	0	AT3G60670	zinc-binding protein, putative, expressed; PLATZ transcription factor family protein	PLATZ transcription factor family protein	PLATZ, zf-B_box, Ecl1	PLATZ, zf-B_box, Ecl1
Gohir.A07G103400.1	NEC	EC	3.73627	4.81124e-06	3.71073e-05	0	0	0	0	0	0	0	NA	NA	0	#N/A	#N/A
Gohir.D11G192600.1	NEC	EC	3.73624	5.68773e-08	6.86299e-07	PF00190	KOG3032	0	0	0	GO:0045735	0	AT2G18540	cupin domain containing protein, expressed; RmlC-like cupins superfamily protein	RmlC-like cupins superfamily protein	Cupin_1, Cupin_2, Cupin_6, Cupin_3, 3-HAO, AraC_binding, CENP-C_C	Cupin_1, Cupin_2, Cupin_6, Cupin_3, 3-HAO, AraC_binding, CENP-C_C
Gohir.D11G254400.1	NEC	EC	3.73307	7.34378e-06	5.42756e-05	PF03080,PF14365	0	0	0	0	0	0	AT5G18460	carboxyl-terminal peptidase, putative, expressed; Protein of Unknown Function (DUF239)	Protein of Unknown Function (DUF239)	Neprosin, Neprosin_AP	Neprosin, Neprosin_AP
Gohir.A12G238400.1	NEC	EC	3.73162	1.87068e-09	3.12326e-08	PF03083	KOG1623	0	0	K15382	GO:0016021	0	AT4G10850	nodulin MtN3 family protein, putative, expressed; Nodulin MtN3 family protein	Nodulin MtN3 family protein	MtN3_slv, Alg14, Meckelin, CobD_Cbib, DUF3270	MtN3_slv, Alg14, Meckelin, CobD_Cbib, DUF3270
Gohir.D11G093900.1	NEC	EC	3.73055	8.13105e-19	7.44096e-17	PF00067	KOG0157	1.14.14.1	0	0	GO:0055114,GO:0005506,GO:0020037,GO:0016705	K15398	AT4G00360	cytochrome P450, putative, expressed; cytochrome P450, family 86, subfamily A, polypeptide 2	cytochrome P450, family 86, subfamily A, polypeptide 8	p450	p450
Gohir.A10G201800.1	NEC	EC	3.72927	1.37333e-08	1.90707e-07	PF00112,PF08246	KOG1542	3.4.22.15	0	K01373	GO:0008234,GO:0006508	0	AT3G54940	cysteine proteinase A494 precursor, putative, expressed; Papain family cysteine protease	Papain family cysteine protease	Peptidase_C1, Inhibitor_I29, Peptidase_C1_2, Phage_int_SAM_4	Peptidase_C1, Inhibitor_I29, Peptidase_C1_2, Phage_int_SAM_4
Gohir.A11G076300.1	NEC	EC	3.72901	5.51697e-16	3.2111e-14	PF00046,PF04618,PF02183	KOG0483	0	0	K09338	GO:0003700,GO:0003677,GO:0006355,GO:0005634,GO:0043565	0	AT4G16780	homeobox associated leucine zipper, putative, expressed; homeobox protein 2	homeobox-leucine zipper protein 3	HD-ZIP_N, Homeodomain, HALZ, Homeobox_KN, NRBF2, YabA, CHDCT2	HD-ZIP_N, Homeodomain, HALZ, Homeobox_KN, NRBF2, YabA, CHDCT2
Gohir.D12G103400.3	NEC	EC	3.72804	4.25048e-07	4.23039e-06	PF00319,PF01486	KOG0014	0	0	0	GO:0005634,GO:0006355,GO:0003677,GO:0046983,GO:0003700	0	AT5G13790	OsMADS27 - MADS-box family gene with MIKCc type-box, expressed; AGAMOUS-like 15	AGAMOUS-like 15	SRF-TF, K-box, BPL_N	SRF-TF, K-box, BPL_N
Gohir.A02G018500.1	NEC	EC	3.72764	0.000446828	0.00204779	PF05694	KOG0918	0	0	K17285	GO:0008430	0	AT4G14030	selenium-binding protein, putative, expressed; selenium-binding protein 1	selenium-binding protein 1	SBP56, SGL	SBP56, SGL
Gohir.A05G074800.1	NEC	EC	3.72626	2.74698e-10	5.52192e-09	PF02121	KOG3668	0	0	0	GO:0006810,GO:0005622	0	NA	NA	0	IP_trans, PRELI	IP_trans, PRELI
Gohir.D08G059901.1	NEC	EC	3.72619	0.000723881	0.00311891	0	0	0	SignalP-noTM	0	0	0	NA	NA	NA	GRP	GRP
Gohir.D12G259100.1	NEC	EC	3.72489	1.14765e-05	8.05917e-05	PF07918	0	0	0	0	0	0	NA	NA	CAP160 protein	CAP160, PIEZO	CAP160, PIEZO
Gohir.A02G027300.1	NEC	EC	3.72209	1.56918e-11	4.06084e-10	PF00234	0	0	SignalP-noTM	0	0	0	AT2G38540	LTPL7 - Protease inhibitor/seed storage/LTP family protein precursor, expressed; lipid transfer protein 1	lipid transfer protein 1	Tryp_alpha_amyl, LTP_2	Tryp_alpha_amyl, LTP_2
Gohir.A05G075600.1	NEC	EC	3.72146	0.0025739	0.00940616	0	0	0	0	0	0	0	NA	NA	0	DUF3549, Ndc80_HEC	DUF3549, Ndc80_HEC
Gohir.D11G132400.1	NEC	EC	3.71977	0.020567	0.0537582	0	0	0	0	0	0	0	NA	NA	0	#N/A	#N/A
Gohir.A02G177600.1	NEC	EC	3.71957	1.13868e-17	8.77051e-16	PF02042	0	0	0	0	0	0	AT4G35590	RWP-RK domain-containing protein, putative, expressed; RWP-RK domain-containing protein	RWP-RK domain-containing protein	RWP-RK, DUF3020	RWP-RK, DUF3020
Gohir.D05G072100.1	NEC	EC	3.71758	3.75763e-11	9.03513e-10	PF00010	0	0	0	0	GO:0046983,GO:0003677	0	NA	NA	basic helix-loop-helix (bHLH) DNA-binding superfamily protein	HLH, IL11, ZapB	HLH, IL11, ZapB
Gohir.D12G188000.1	NEC	EC	3.71741	3.70019e-08	4.64676e-07	PF03088	KOG1520	4.3.3.2	0	0	GO:0016844,GO:0009058	0	AT1G74020	SMP-30/Gluconolaconase/LRE-like region containing protein, expressed; strictosidine synthase 2	strictosidine synthase 2	Str_synth, SGL, NHL	Str_synth, SGL, NHL
Gohir.D09G139000.1	NEC	EC	3.71595	0.000431693	0.00198491	PF02987	0	0	0	0	0	0	NA	NA	late embryogenesis abundant protein, putative / LEA protein, putative	LEA_4, Apolipoprotein, YtxH, Mucin-like	LEA_4, Apolipoprotein, YtxH, Mucin-like
Gohir.D10G020200.1	NEC	EC	3.71591	1.69072e-16	1.07624e-14	PF00134,PF02984	KOG0656	0	0	0	GO:0005634,GO:0051726	0	AT4G03270	cyclin, putative, expressed; Cyclin D6;1	Cyclin D6;1	Cyclin_N, Cyclin_C	Cyclin_N, Cyclin_C
Gohir.D02G226500.1	NEC	EC	3.71216	1.54004e-07	1.69255e-06	PF00230	KOG0223	0	0	K09872	GO:0006810,GO:0005215,GO:0016020	0	AT2G16850	aquaporin protein, putative, expressed; plasma membrane intrinsic protein 2;8	plasma membrane intrinsic protein 2;8	MIP	MIP
Gohir.D07G237500.1	NEC	EC	3.70735	1.40012e-06	1.22967e-05	PF07765	0	0	0	0	GO:0003779	0	NA	NA	Kinase interacting (KIP1-like) family protein	KIP1, PIN_8, DUF745	KIP1, PIN_8, DUF745
Gohir.A05G401550.1	NEC	EC	3.70518	9.5271e-23	1.57245e-20	0	0	0	0	0	0	0	AT1G05575	expressed protein	0	DUF2705	DUF2705
Gohir.A03G100000.1	NEC	EC	3.70407	1.33062e-11	3.49196e-10	PF04116	KOG0874	1.14.13.169	0	0	GO:0055114,GO:0008610,GO:0005506,GO:0016491	0	AT1G14290	sphingolipid C4-hydroxylase SUR2, putative, expressed; sphingoid base hydroxylase 2	sphingoid base hydroxylase 2	FA_hydroxylase, Cation_ATPase_C	FA_hydroxylase, Cation_ATPase_C
Gohir.D05G205900.3	NEC	EC	3.70294	2.36734e-05	0.000152756	0	0	0	0	0	0	0	NA	NA	cold regulated gene 27	#N/A	#N/A
Gohir.D09G073800.1	NEC	EC	3.70157	4.02881e-07	4.03615e-06	0	0	0	0	0	0	0	AT4G18570	chloroplast unusual positioning protein, putative, expressed; Tetratricopeptide repeat (TPR)-like superfamily protein	Tetratricopeptide repeat (TPR)-like superfamily protein	PRKG1_interact, PikAIV_N, HALZ, FlaC_arch, 5_nucleotid, Spore_III_AB, YscO, pRN1_helical, Cnn_1N, ApoLp-III	PRKG1_interact, PikAIV_N, HALZ, FlaC_arch, 5_nucleotid, Spore_III_AB, YscO, pRN1_helical,
Gohir.D13G199100.1	NEC	EC	3.70101	2.51805e-10	5.09496e-09	PF05553,PF14364	0	0	0	0	0	0	NA	NA	Protein of unknown function (DUF761)	DUF761, DUF4408	DUF761, DUF4408
Gohir.A03G172500.2	NEC	EC	3.69854	1.67143e-05	0.000112191	PF14368	0	0	0	0	0	0	AT5G64080	LTPL69 - Protease inhibitor/seed storage/LTP family protein precursor, expressed; Bifunctional inhibitor/lipid-transfer protein/seed storage 2S albumin superfamily protein	Bifunctional inhibitor/lipid-transfer protein/seed storage 2S albumin superfamily protein	LTP_2, Tryp_alpha_amyl, Hydrophob_seed	LTP_2, Tryp_alpha_amyl, Hydrophob_seed
Gohir.D02G125500.1	NEC	EC	3.69823	1.53294e-13	5.82593e-12	PF02365	0	0	0	0	GO:0006355,GO:0003677	0	AT1G26870	no apical meristem protein, putative, expressed; NAC (No Apical Meristem) domain transcriptional regulator superfamily protein	NAC (No Apical Meristem) domain transcriptional regulator superfamily protein	NAM	NAM
Gohir.A05G402100.1	NEC	EC	3.69819	2.88043e-09	4.63497e-08	0	0	0	0	0	0	0	NA	NA	0	DUF688, SR-25	DUF688, SR-25
Gohir.A08G165850.1	NEC	EC	3.69546	6.95351e-12	1.93243e-10	PF02458	0	2.3.1.133	0	0	GO:0016747	0	AT5G02890	transferase family protein, putative, expressed; HXXXD-type acyl-transferase family protein	HXXXD-type acyl-transferase family protein	Transferase	Transferase
Gohir.A11G057300.1	NEC	EC	3.69507	8.07103e-05	0.000455649	0	0	0	0	0	0	0	NA	NA	Putative membrane lipoprotein	HKR_ArcB_TM, RQC, Peptidase_U4	HKR_ArcB_TM, RQC, Peptidase_U4
Gohir.A06G041800.1	NEC	EC	3.69389	1.00122e-09	1.78375e-08	0	0	0	0	0	0	0	AT1G75710	ZOS4-01 - C2H2 zinc finger protein, expressed; C2H2-like zinc finger protein	C2H2-like zinc finger protein	PARP, zf-C2H2, zinc_ribbon_9, DUF908, ATP-synt_E, TFIIA, YajC	PARP, zf-C2H2, zinc_ribbon_9, DUF908, ATP-synt_E, TFIIA, YajC
Gohir.A09G050400.1	NEC	EC	3.6929	3.29531e-10	6.52203e-09	PF00106	KOG1208	1.1.1.330	0	K19329	0	0	AT4G23430	oxidoreductase, short chain dehydrogenase/reductase family domain containing family, expressed; NAD(P)-binding Rossmann-fold superfamily protein	NAD(P)-binding Rossmann-fold superfamily protein	adh_short, adh_short_C2, KR, Epimerase	adh_short, adh_short_C2, KR, Epimerase
Gohir.D08G163500.1	NEC	EC	3.69185	1.68063e-11	4.31973e-10	PF11891	0	0	0	0	0	0	AT5G12470	expressed protein; Protein of unknown function (DUF3411)	Protein of unknown function (DUF3411)	RETICULATA-like, RhlB	RETICULATA-like, RhlB
Gohir.D10G059500.1	NEC	EC	3.69122	1.35649e-06	1.19499e-05	PF12023	0	0	0	0	0	0	AT5G11970	expressed protein; Protein of unknown function (DUF3511)	Protein of unknown function (DUF3511)	DUF3511, fn3_4	DUF3511, fn3_4
Gohir.A11G094400.1	NEC	EC	3.69055	1.54729e-05	0.000104844	PF00847	0	0	0	0	GO:0003700,GO:0006355	0	NA	NA	cytokinin response factor 6	AP2	AP2
Gohir.D11G053400.1	NEC	EC	3.68817	5.18192e-09	7.87754e-08	PF00319,PF01486	KOG0014	0	0	0	GO:0005634,GO:0006355,GO:0003677,GO:0003700,GO:0046983	0	AT4G37940	OsMADS27 - MADS-box family gene with MIKCc type-box, expressed; AGAMOUS-like 21	AGAMOUS-like 16	SRF-TF, K-box, DUF2721, Spc7, bZIP_1, FlaC_arch, ZapB	SRF-TF, K-box, DUF2721, Spc7, bZIP_1, FlaC_arch, ZapB
Gohir.D11G279600.1	NEC	EC	3.68757	0.000199972	0.00101155	PF00561	KOG4178	3.3.2.10	0	0	0	0	AT3G05600	hydrolase, alpha/beta fold family domain containing protein, expressed; alpha/beta-Hydrolases superfamily protein	alpha/beta-Hydrolases superfamily protein	Abhydrolase_1, Abhydrolase_6, Hydrolase_4, Chlorophyllase2, Chlorophyllase	Abhydrolase_1, Abhydrolase_6, Hydrolase_4, Chlorophyllase2, Chlorophyllase
Gohir.A07G083300.1	NEC	EC	3.68706	3.55329e-11	8.57951e-10	PF00759	0	3.2.1.4	SignalP-noTM	0	GO:0004553,GO:0005975	0	AT2G32990	endoglucanase, putative, expressed; glycosyl hydrolase 9B8	glycosyl hydrolase 9B8	Glyco_hydro_9	Glyco_hydro_9
Gohir.D05G232900.1	NEC	EC	3.68099	1.68e-05	0.000112684	PF00155	KOG0257	2.6.1.83	0	K10206	GO:0008483,GO:0030170,GO:0009058	0	AT2G13810	aminotransferase, classes I and II, domain containing protein, expressed; AGD2-like defense response protein 1	AGD2-like defense response protein 1	Aminotran_1_2, Alliinase_C	Aminotran_1_2, Alliinase_C
Gohir.A13G088845.1	NEC	EC	3.67982	7.49461e-05	0.00042597	0	0	0	SignalP-noTM	0	0	0	NA	NA	0	Orexin	Orexin
Gohir.D05G084400.1	NEC	EC	3.67895	1.37919e-06	1.21267e-05	PF05406,PF08063,PF00533,PF00644,PF02877	KOG1037	2.4.2.30	0	K10798	GO:0003950,GO:0006471	0	AT5G22470	poly synthetase 3, putative, expressed; NAD+ ADP-ribosyltransferases;NAD+ ADP-ribosyltransferases	NAD+ ADP-ribosyltransferases;NAD+ ADP-ribosyltransferases	PARP, PARP_reg, PADR1, WGR, BRCT, BRCT_2	PARP, PARP_reg, PADR1, WGR, BRCT, BRCT_2
Gohir.A11G125200.1	NEC	EC	3.67877	4.54947e-11	1.07489e-09	PF00916,PF01740	KOG0236	0	0	K17471	GO:0008272,GO:0015116,GO:0008271,GO:0055085,GO:0016021,GO:0016020,GO:0009507	0	AT3G51895	sulfate transporter, putative, expressed; sulfate transporter 3;1	sulfate transporter 3;1	Sulfate_transp, STAS, STAS_2	Sulfate_transp, STAS, STAS_2
Gohir.A05G282800.1	NEC	EC	3.67861	0.000668258	0.00291019	0	0	0	0	0	0	0	NA	NA	0	#N/A	#N/A
Gohir.A12G261700.2	NEC	EC	3.67816	0.00617083	0.0196634	PF08240	0	1.1.1.140	0	0	GO:0055114	0	AT5G51970	dehydrogenase, putative, expressed; GroES-like zinc-binding alcohol dehydrogenase family protein	GroES-like zinc-binding alcohol dehydrogenase family protein	ADH_N, ADH_zinc_N, Glu_dehyd_C, NCD3G, AlaDh_PNT_C	ADH_N, ADH_zinc_N, Glu_dehyd_C, NCD3G, AlaDh_PNT_C
Gohir.A08G022600.1	NEC	EC	3.67476	4.58026e-07	4.52098e-06	PF13292,PF02779,PF02780	KOG0523	2.2.1.7	0	K01662	GO:0008661,GO:0016114	0	AT4G15560	transketolase, putative, expressed; Deoxyxylulose-5-phosphate synthase	Deoxyxylulose-5-phosphate synthase	DXP_synthase_N, Transket_pyr, Transketolase_C, TPP_enzyme_C, E1_dh, Transketolase_N	DXP_synthase_N, Transket_pyr, Transketolase_C, TPP_enzyme_C, E1_dh, Transketolase_N
Gohir.A13G151000.1	NEC	EC	3.67417	1.95535e-13	7.2816e-12	PF00400	KOG0316	0	0	K14829	GO:0005515	0	NA	NA	Transducin/WD40 repeat-like superfamily protein	WD40, ANAPC4_WD40, PQQ_3, Nucleoporin_N, PQQ_2, PQQ	WD40, ANAPC4_WD40, PQQ_3, Nucleoporin_N, PQQ_2, PQQ
Gohir.D11G288100.1	NEC	EC	3.67106	4.36909e-07	4.33569e-06	PF00646	0	0	0	0	GO:0005515	0	NA	NA	F-box family protein	F-box, F-box-like	F-box, F-box-like
Gohir.D11G010500.1	NEC	EC	3.66505	7.48952e-14	3.02025e-12	PF02458	0	2.3.1.99	SignalP-noTM	0	GO:0016747	0	AT5G23940	transferase family protein, putative, expressed; HXXXD-type acyl-transferase family protein	HXXXD-type acyl-transferase family protein	Transferase	Transferase
Gohir.D13G155800.1	NEC	EC	3.66385	1.05607e-13	4.12556e-12	PF00646,PF08387	0	0	0	0	GO:0005515	0	NA	NA	F-box family protein	F-box, FBD, F-box-like	F-box, FBD, F-box-like
Gohir.D10G029500.1	NEC	EC	3.66283	1.33197e-06	1.1763e-05	PF00046	0	0	0	0	GO:0003677	0	AT2G33880	homeobox domain containing protein, expressed; homeobox-3	homeobox-3	Homeodomain	Homeodomain
Gohir.A02G067400.1	NEC	EC	3.66281	1.97549e-07	2.12562e-06	PF03083	KOG1623	0	0	K15382	GO:0016021,GO:0051119	0	AT1G21460	nodulin MtN3 family protein, putative, expressed; Nodulin MtN3 family protein	Nodulin MtN3 family protein	MtN3_slv, Herpes_LMP1	MtN3_slv, Herpes_LMP1
Gohir.D12G083701.1	NEC	EC	3.66101	0.00304339	0.010849	0	0	0	0	0	0	0	NA	NA	binding	Tnp_DNA_bind	Tnp_DNA_bind
Gohir.A05G378400.1	NEC	EC	3.65986	0.00400699	0.0136684	0	0	0	SignalP-noTM	0	0	0	NA	NA	protodermal factor 1	#N/A	#N/A
Gohir.D02G195700.1	NEC	EC	3.65733	0.00031617	0.00150681	PF14368	0	0	SignalP-noTM	0	0	0	AT5G64080	LTPL69 - Protease inhibitor/seed storage/LTP family protein precursor, expressed; Bifunctional inhibitor/lipid-transfer protein/seed storage 2S albumin superfamily protein	Bifunctional inhibitor/lipid-transfer protein/seed storage 2S albumin superfamily protein	LTP_2, Tryp_alpha_amyl, Hydrophob_seed	LTP_2, Tryp_alpha_amyl, Hydrophob_seed
Gohir.A11G122000.1	NEC	EC	3.65476	2.74356e-09	4.42397e-08	PF14416,PF13839	0	0	0	0	0	0	AT5G19160	PMR5, putative, expressed; TRICHOME BIREFRINGENCE-LIKE 11	TRICHOME BIREFRINGENCE-LIKE 11	PC-Esterase, PMR5N, DUF1474	PC-Esterase, PMR5N, DUF1474
Gohir.A01G076100.1	NEC	EC	3.65338	3.95159e-05	0.000241113	PF00190	0	0	SignalP-noTM	0	GO:0045735	0	NA	NA	germin-like protein 5	Cupin_1, Cupin_2	Cupin_1, Cupin_2
Gohir.D09G058500.1	NEC	EC	3.65329	1.01424e-09	1.80278e-08	PF05042	0	1.11.2.3	0	K17991	0	0	AT4G26740	caleosin related protein, putative, expressed; seed gene 1	seed gene 1	Caleosin	Caleosin
Gohir.A08G010750.1	NEC	EC	3.65244	4.73883e-17	3.26379e-15	0	0	0	0	0	0	0	NA	NA	NA	DUF5082, APG17, DUF5344, Lipocalin_8, RTBV_P46, PspA_IM30, Csm1_N, TLE_N, DUF4140, ATG16, DASH_Spc34, HAUS-augmin3, FapA, TMPIT, Atg14, DivIC, Myc-LZ	DUF5082, APG17, DUF5344, Lipocalin_8, RTBV_P46, PspA_IM30, Csm1_N, TLE_N, DUF4140, ATG16,
Gohir.A04G078800.1	NEC	EC	3.65186	1.46751e-06	1.28276e-05	PF00403	KOG1603	0	0	0	GO:0030001,GO:0046872	0	AT2G37390	heavy metal-associated domain containing protein, expressed; Chloroplast-targeted copper chaperone protein	Chloroplast-targeted copper chaperone protein	HMA, Caldesmon, CCDC106, DUF4551	HMA, Caldesmon, CCDC106, DUF4551
Gohir.A06G125202.1	NEC	EC	3.65124	0.000240902	0.00119121	PF13676	0	0	0	0	GO:0005515,GO:0007165	0	AT1G61105	expressed protein; Toll-Interleukin-Resistance (TIR) domain family protein	Toll-Interleukin-Resistance (TIR) domain family protein	TIR_2, TIR	TIR_2, TIR
Gohir.A10G102300.1	NEC	EC	3.65051	0.00177267	0.00681549	0	0	0	0	0	0	0	AT5G40460	expressed protein	0	#N/A	#N/A
Gohir.D13G034900.1	NEC	EC	3.64845	1.81357e-16	1.14341e-14	PF04833	0	0	0	0	GO:0010215,GO:0016049,GO:0031225	0	AT1G09790	COBRA, putative, expressed; COBRA-like protein 6 precursor	COBRA-like protein 6 precursor	COBRA	COBRA
Gohir.A10G159200.1	NEC	EC	3.64636	3.37587e-05	0.000209694	PF04083,PF00561	KOG2624	3.1.1.3	SignalP-noTM	0	GO:0006629	0	AT5G14180	triacylglycerol lipase precursor, putative, expressed; Myzus persicae-induced lipase 1	Myzus persicae-induced lipase 1	Abhydro_lipase, Abhydrolase_1, Hydrolase_4, Esterase, Peptidase_S9	Abhydro_lipase, Abhydrolase_1, Hydrolase_4, Esterase, Peptidase_S9
Gohir.A02G160700.1	NEC	EC	3.64267	1.95453e-06	1.66489e-05	PF02362	0	0	0	0	GO:0003677	0	NA	NA	AP2/B3-like transcriptional factor family protein	B3, tRNA_SAD	B3, tRNA_SAD
Gohir.A01G107000.2	NEC	EC	3.64262	9.75558e-09	1.39667e-07	PF04783,PF04782	0	0	0	0	0	0	NA	NA	Protein of unknown function (DUF630 and DUF632)	DUF632, DUF630, VioE, Sod_Ni, BEX	DUF632, DUF630, VioE, Sod_Ni, BEX
Gohir.D01G028100.2	NEC	EC	3.64147	0.0016269	0.00632024	PF04535	0	0	0	0	0	0	AT1G17200	membrane associated DUF588 domain containing protein, putative, expressed; Uncharacterised protein family (UPF0497)	Uncharacterised protein family (UPF0497)	DUF588	DUF588
Gohir.A05G163300.1	NEC	EC	3.63979	2.2522e-25	5.33759e-23	0	0	0	0	0	0	0	AT1G11120	expressed protein	0	#N/A	#N/A
Gohir.A06G164500.1	NEC	EC	3.63878	2.94738e-08	3.81541e-07	PF00153	KOG0769	0	0	K13354	0	0	AT2G39970	mitochondrial carrier protein, putative, expressed; Mitochondrial substrate carrier family protein	Mitochondrial substrate carrier family protein	Mito_carr, HMD	Mito_carr, HMD
Gohir.A11G259600.1	NEC	EC	3.63861	6.31924e-12	1.76671e-10	PF02812,PF00208	KOG2250	1.4.1.3	0	K00261	GO:0016491,GO:0006520,GO:0055114	0	AT5G18170	glutamate dehydrogenase protein, putative, expressed; glutamate dehydrogenase 1	glutamate dehydrogenase 1	ELFV_dehydrog, ELFV_dehydrog_N, 2-Hacid_dh_C, AdoHcyase_NAD, zf-RING_12	ELFV_dehydrog, ELFV_dehydrog_N, 2-Hacid_dh_C, AdoHcyase_NAD, zf-RING_12
Gohir.D13G152264.1	NEC	EC	3.63819	2.18924e-15	1.1497e-13	0	0	0	0	0	0	0	AT3G15095	expressed protein	0	#N/A	#N/A
Gohir.A09G220500.1	NEC	EC	3.63761	1.5182e-12	4.74068e-11	0	0	0	0	0	0	0	NA	NA	0	#N/A	#N/A
Gohir.D05G240200.1	NEC	EC	3.63649	2.02251e-08	2.70923e-07	PF00106	KOG1205	1.1.1.146	0	0	0	0	AT4G10020	oxidoreductase, short chain dehydrogenase/reductase family domain containing protein, expressed; hydroxysteroid dehydrogenase 5	hydroxysteroid dehydrogenase 5	adh_short, adh_short_C2, KR, Epimerase, Polysacc_synt_2	adh_short, adh_short_C2, KR, Epimerase, Polysacc_synt_2
Gohir.A03G107800.1	NEC	EC	3.63238	0.000235655	0.00116814	PF06404	0	0	SignalP-noTM	0	GO:0005576,GO:0008283,GO:0008083	0	NA	NA	phytosulfokine 4 precursor	PSK	PSK
Gohir.D13G183400.1	NEC	EC	3.62954	4.71753e-08	5.78906e-07	PF00892	0	0	0	0	GO:0016021,GO:0016020,GO:0022857	0	AT1G09380	integral membrane protein DUF6 containing protein, expressed; nodulin MtN21 /EamA-like transporter family protein	nodulin MtN21 /EamA-like transporter family protein	EamA, TMEM234, DUF4131	EamA, TMEM234, DUF4131
Gohir.D07G197200.1	NEC	EC	3.6289	1.27118e-10	2.749e-09	PF00122,PF00689	KOG0204	3.6.3.8	0	K01537	0	0	NA	NA	ATPase E1-E2 type family protein / haloacid dehalogenase-like hydrolase family protein	Cation_ATPase_C, E1-E2_ATPase, Hydrolase, RseC_MucC, DUF1286	Cation_ATPase_C, E1-E2_ATPase, Hydrolase, RseC_MucC, DUF1286
Gohir.A04G044800.1	NEC	EC	3.62759	5.98929e-09	8.97501e-08	PF00982,PF02358	KOG1050	2.4.1.15	0	0	GO:0003824,GO:0005992	0	AT1G78580	trehalose-6-phosphate synthase, putative, expressed; trehalose-6-phosphate synthase	trehalose-6-phosphate synthase	Glyco_transf_20, Trehalose_PPase, BRX_N	Glyco_transf_20, Trehalose_PPase, BRX_N
Gohir.A09G142900.1	NEC	EC	3.62756	9.37347e-16	5.20031e-14	PF03016	KOG1021	2.4.2.41	0	0	GO:0016757,GO:0006486	0	AT5G03795	exostosin family protein, putative, expressed; Exostosin family protein	Exostosin family protein	Exostosin, Glycos_transf_1	Exostosin, Glycos_transf_1
Gohir.D12G180200.1	NEC	EC	3.62667	7.39945e-12	2.04022e-10	PF02042	0	0	0	0	0	0	NA	NA	RWP-RK domain-containing protein	RWP-RK, HrpJ	RWP-RK, HrpJ
Gohir.D09G005700.1	NEC	EC	3.62452	4.41357e-06	3.43035e-05	PF01490	KOG1303	0	0	0	0	0	AT5G09220	amino acid transporter, putative, expressed; amino acid permease 2	amino acid permease 2	Aa_trans	Aa_trans
Gohir.A08G156700.1	NEC	EC	3.62271	0.0188507	0.0500469	0	0	0	0	0	0	0	NA	NA	microspore-specific promoter 2	#N/A	#N/A
Gohir.D01G170800.1	NEC	EC	3.62151	2.28506e-09	3.75006e-08	PF01063	KOG0975	2.6.1.42	0	K00826	GO:0003824,GO:0008152	0	AT1G50110	aminotransferase domain containing protein, putative, expressed; D-aminoacid aminotransferase-like PLP-dependent enzymes superfamily protein	D-aminoacid aminotransferase-like PLP-dependent enzymes superfamily protein	Aminotran_4	Aminotran_4
Gohir.D12G010700.1	NEC	EC	3.61956	4.05954e-08	5.05408e-07	PF13668	0	0	SignalP-noTM	0	0	0	NA	NA	0	Ferritin_2	Ferritin_2
Gohir.A09G161750.1	NEC	EC	3.61915	7.79823e-05	0.000441705	PF04043	0	0	SignalP-noTM	0	GO:0004857	0	NA	NA	NA	PMEI	PMEI
Gohir.D02G146300.1	NEC	EC	3.61849	0.0054282	0.0176748	0	0	0	0	0	0	0	AT1G27990	expressed protein	0	#N/A	#N/A
Gohir.D12G265400.1	NEC	EC	3.6182	8.33482e-05	0.000468501	PF01277	0	0	0	0	GO:0016021,GO:0012511	0	AT3G18570	oleosin, putative, expressed; Oleosin family protein	Oleosin family protein	Oleosin, MAPEG	Oleosin, MAPEG
Gohir.A12G223200.1	NEC	EC	3.61702	5.09624e-13	1.74976e-11	PF08879,PF08880	0	0	0	0	GO:0006355,GO:0032502,GO:0005524,GO:0006351,GO:0005634	0	AT2G22840	growth-regulating factor, putative, expressed; growth-regulating factor 1	growth-regulating factor 2	WRC, QLQ	WRC, QLQ
Gohir.A11G186000.1	NEC	EC	3.6143	4.4037e-07	4.3616e-06	PF00190	KOG3263	0	0	0	GO:0045735	0	AT2G18540	cupin domain containing protein, expressed; RmlC-like cupins superfamily protein	RmlC-like cupins superfamily protein	Cupin_1, Cupin_2, Cupin_6, Cupin_3, 3-HAO, CENP-C_C, AraC_binding	Cupin_1, Cupin_2, Cupin_6, Cupin_3, 3-HAO, CENP-C_C, AraC_binding
Gohir.D06G161800.1	NEC	EC	3.61425	0.0028783	0.0103395	PF06624	KOG3491	0	0	0	GO:0005783	0	AT1G27350	membrane protein, putative, expressed; Ribosome associated membrane protein RAMP4	Ribosome associated membrane protein RAMP4	RAMP4, DUF1206	RAMP4, DUF1206
Gohir.A06G025000.1	NEC	EC	3.61356	2.64929e-12	7.93483e-11	PF06404	0	0	SignalP-noTM	0	GO:0005576,GO:0008283,GO:0008083	0	AT3G49780	phytosulfokines precursor, putative, expressed; phytosulfokine 4 precursor	phytosulfokine 4 precursor	PSK	PSK
Gohir.D07G056600.2	NEC	EC	3.61183	8.70233e-14	3.46698e-12	PF13855,PF07714	KOG1187	2.7.11.1	SignalP-noTM	0	GO:0004672,GO:0006468,GO:0005515	0	AT5G63410	expressed protein; Leucine-rich repeat protein kinase family protein	Leucine-rich repeat protein kinase family protein	Pkinase_Tyr, Pkinase, LRR_4, LRR_8, LRR_1, LRRNT_2, MLANA, LMBR1, Orf78, LRR_6, LSR	Pkinase_Tyr, Pkinase, LRR_4, LRR_8, LRR_1, LRRNT_2, MLANA, LMBR1, Orf78, LRR_6, LSR
Gohir.A07G014500.1	NEC	EC	3.60956	1.97208e-08	2.64781e-07	PF00097	0	0	0	K16277	GO:0046872	0	NA	NA	DREB2A-interacting protein 2	zf-C3HC4_2, zf-C3HC4, zf-RING_UBOX, zf-RING_2, zf-RING_5, zf-RING_6, zf-C3HC4_4, RAWUL, TerY_C, zf-Nse, zf-LITAF-like, zf-RING_4, DUF1272, Prok-RING_4, zf-rbx1	zf-C3HC4_2, zf-C3HC4, zf-RING_UBOX, zf-RING_2, zf-RING_5, zf-RING_6, zf-C3HC4_4, RAWUL, Te
Gohir.A04G097700.1	NEC	EC	3.60825	1.88521e-13	7.0545e-12	PF00854	KOG1237	0	0	K14638	GO:0006810,GO:0005215,GO:0016020	0	AT1G69870	peptide transporter PTR2, putative, expressed; nitrate transporter 1.7	nitrate transporter 1.7	PTR2	PTR2
Gohir.D11G132100.1	NEC	EC	3.60615	7.85388e-13	2.57967e-11	PF01965	KOG2764	0	0	K18881	0	0	AT2G38860	DJ-1 family protein, putative, expressed; Class I glutamine amidotransferase-like superfamily protein	Class I glutamine amidotransferase-like superfamily protein	DJ-1_PfpI, SNO, ThiJ_like, DUF4723	DJ-1_PfpI, SNO, ThiJ_like, DUF4723
Gohir.D13G233400.1	NEC	EC	3.60363	2.48782e-19	2.47252e-17	PF00046	0	0	0	0	GO:0003677	0	AT5G59340	homeobox domain containing protein, expressed; WUSCHEL related homeobox 2	WUSCHEL related homeobox 2	Homeodomain, UPF0154	Homeodomain, UPF0154
Gohir.A11G321500.1	NEC	EC	3.60091	3.09059e-10	6.1564e-09	0	0	0	0	0	0	0	AT3G52870	calmodulin-binding protein, putative, expressed; IQ calmodulin-binding motif family protein	IQ calmodulin-binding motif family protein	IQ, Synapsin_N	IQ, Synapsin_N
Gohir.A10G207300.4	NEC	EC	3.59961	1.73284e-07	1.88561e-06	PF02270	KOG2905	3.6.4.12	0	K03139	GO:0005674,GO:0006366,GO:0006367	0	AT3G52270	transcription initiation factor IIF beta subunit, putative, expressed; Transcription initiation factor IIF, beta subunit	Transcription initiation factor IIF, beta subunit	TFIIF_beta, TFIIF_beta_N	TFIIF_beta, TFIIF_beta_N
Gohir.A07G017800.1	NEC	EC	3.59909	3.25968e-15	1.64998e-13	PF01095,PF04043	0	3.1.1.11	SignalP-noTM	K01051	GO:0042545,GO:0030599,GO:0004857,GO:0005618	0	AT3G43270	pectinesterase, putative, expressed; Plant invertase/pectin methylesterase inhibitor superfamily	Plant invertase/pectin methylesterase inhibitor superfamily	Pectinesterase, PMEI, Pectate_lyase_3	Pectinesterase, PMEI, Pectate_lyase_3
Gohir.D05G160500.2	NEC	EC	3.59847	3.84148e-10	7.51394e-09	PF00046	0	0	0	0	GO:0003677	0	AT2G33880	homeobox domain containing protein, expressed; homeobox-3	homeobox-3	Homeodomain, SUIM_assoc, DUF1635	Homeodomain, SUIM_assoc, DUF1635
Gohir.D02G029200.1	NEC	EC	3.59576	5.61701e-26	1.47491e-23	PF00067	KOG0157	1.14.13.173	0	0	GO:0020037,GO:0016705,GO:0005506,GO:0055114	0	AT3G14630	cytochrome P450 72A1, putative, expressed; cytochrome P450, family 72, subfamily A, polypeptide 9	cytochrome P450, family 72, subfamily A, polypeptide 9	p450, SH3_13	p450, SH3_13
Gohir.D01G017800.1	NEC	EC	3.59521	2.9548e-05	0.000186166	PF00642	0	0	0	0	GO:0046872	0	AT1G03790	zinc finger/CCCH transcription factor, putative, expressed; Zinc finger C-x8-C-x5-C-x3-H type family protein	Zinc finger C-x8-C-x5-C-x3-H type family protein	zf-CCCH, zf_CCCH_4, zf-CCCH_2, Torus	zf-CCCH, zf_CCCH_4, zf-CCCH_2, Torus
Gohir.D04G087700.1	NEC	EC	3.59487	9.71205e-08	1.11594e-06	PF08263,PF00069,PF13855	KOG1187	2.7.11.1	SignalP-noTM	0	GO:0006468,GO:0004672,GO:0005515,GO:0005524	0	AT4G30520	receptor-like kinase, putative, expressed; Leucine-rich repeat protein kinase family protein	Leucine-rich repeat protein kinase family protein	Pkinase, Pkinase_Tyr, LRRNT_2, LRR_8, LRR_4, LRR_1, Pkinase_fungal, LRR_9, STE2, LRR_6	Pkinase, Pkinase_Tyr, LRRNT_2, LRR_8, LRR_4, LRR_1, Pkinase_fungal, LRR_9, STE2, LRR_6
Gohir.D07G020700.1	NEC	EC	3.59415	1.59747e-05	0.000107838	PF03106	0	0	0	0	GO:0043565,GO:0003700,GO:0006355	0	NA	NA	WRKY DNA-binding protein 50	WRKY	WRKY
Gohir.D07G031800.1	NEC	EC	3.59151	6.68532e-13	2.22751e-11	PF00847	0	0	0	0	GO:0003700,GO:0006355	0	AT5G25390	AP2 domain containing protein, expressed; Integrase-type DNA-binding superfamily protein	Integrase-type DNA-binding superfamily protein	AP2, DUF98, OLF	AP2, DUF98, OLF
Gohir.D07G129500.1	NEC	EC	3.59109	6.76221e-05	0.000388451	PF00847	0	0	0	K09285	GO:0007275,GO:0006355,GO:0003700	0	AT1G51190	AP2/EREBP transcription factor BABY BOOM, putative, expressed; Integrase-type DNA-binding superfamily protein	Integrase-type DNA-binding superfamily protein	AP2	AP2
Gohir.D11G070900.1	NEC	EC	3.58862	0.000589069	0.00260834	0	0	0	0	0	0	0	AT3G01516	expressed protein	0	#N/A	#N/A
Gohir.A08G089000.2	NEC	EC	3.58835	1.41928e-06	1.24389e-05	PF03016	KOG1021	2.4.2.41	0	0	GO:0006486,GO:0016757	0	AT5G33290	exostosin family protein, putative, expressed; xylogalacturonan deficient 1	xylogalacturonan deficient 1	Exostosin	Exostosin
Gohir.D12G032200.1	NEC	EC	3.5841	1.00631e-08	1.43447e-07	0	0	0	0	0	0	0	AT4G38810	EF hand family protein, putative, expressed; Calcium-binding EF-hand family protein	Calcium-binding EF-hand family protein	EF-hand_1, EF-hand_7	EF-hand_1, EF-hand_7
Gohir.D09G111650.1	NEC	EC	3.5829	0.000267858	0.00130495	PF00847	0	0	0	0	GO:0003700,GO:0006355,GO:0007275	0	AT1G51190	AP2/EREBP transcription factor BABY BOOM, putative, expressed; Integrase-type DNA-binding superfamily protein	Integrase-type DNA-binding superfamily protein	AP2	AP2
Gohir.A01G216400.1	NEC	EC	3.58189	0.000668247	0.00291019	0	0	0	SignalP-noTM	0	0	0	NA	NA	0	SecIII_SopE_N	SecIII_SopE_N
Gohir.A06G176800.2	NEC	EC	3.58167	4.69609e-13	1.62322e-11	0	0	0	0	0	0	0	NA	NA	0	MBD	MBD
Gohir.A13G176900.1	NEC	EC	3.57936	5.12171e-08	6.25349e-07	PF00892	0	0	0	0	GO:0016020,GO:0016021,GO:0022857	0	AT1G09380	integral membrane protein DUF6 containing protein, expressed; nodulin MtN21 /EamA-like transporter family protein	nodulin MtN21 /EamA-like transporter family protein	EamA, TMEM72, DUF4131, TMEM234	EamA, TMEM72, DUF4131, TMEM234
Gohir.D12G114900.1	NEC	EC	3.5781	3.24722e-07	3.31933e-06	PF01764	0	0	0	0	GO:0006629	0	AT3G61680	lipase, putative, expressed; alpha/beta-Hydrolases superfamily protein	alpha/beta-Hydrolases superfamily protein	Lipase_3, DUF676, NPBW, Thioesterase	Lipase_3, DUF676, NPBW, Thioesterase
Gohir.A01G164100.1	NEC	EC	3.57778	3.02578e-08	3.90052e-07	PF01190	0	0	SignalP-noTM	0	0	0	NA	NA	NA	Pollen_Ole_e_I	Pollen_Ole_e_I
Gohir.D11G221900.1	NEC	EC	3.57771	5.67198e-06	4.30418e-05	PF00168	0	0	SignalP-noTM	0	0	0	AT5G65030	expressed protein	0	C2, CEP76-C2	C2, CEP76-C2
Gohir.A13G121050.1	NEC	EC	3.57526	0.000374326	0.0017488	0	0	0	0	0	0	0	NA	NA	NA	Cas_DxTHG	Cas_DxTHG
Gohir.A12G070600.1	NEC	EC	3.5728	2.32059e-05	0.000150117	0	0	0	0	0	0	0	AT5G66800	expressed protein	0	#N/A	#N/A
Gohir.D09G148800.2	NEC	EC	3.57195	1.64307e-07	1.79722e-06	PF04759	0	0	0	0	0	0	AT2G37880	DUF617 domain containing protein, expressed; Protein of unknown function, DUF617	Protein of unknown function, DUF617	DUF617, Ribosomal_L39	DUF617, Ribosomal_L39
Gohir.A07G043800.1	NEC	EC	3.5695	1.43461e-09	2.45552e-08	PF01277	0	0	0	0	GO:0012511,GO:0016021	0	AT4G25140	oleosin, putative, expressed; oleosin 1	oleosin 1	Oleosin, DUF4389	Oleosin, DUF4389
Gohir.A12G193800.1	NEC	EC	3.5662	6.66536e-05	0.000383364	PF13923,PF02182,PF15227	KOG4172	2.1.1.43	0	K10638	0	0	AT1G57820	zinc finger, C3HC4 type domain containing protein, expressed; Zinc finger (C3HC4-type RING finger) family protein	Zinc finger (C3HC4-type RING finger) family protein	SAD_SRA, zf-C3HC4_2, zf-C3HC4, zf-RING_UBOX, zf-C3HC4_4, zf-RING_2, zf-C3HC4_3, zf-RING_5, Prok-RING_1, PHD, Prok-RING_4, zf-RING_4, zf-RING_10, Zf_RING, zf-RING_6, zf-rbx1	SAD_SRA, zf-C3HC4_2, zf-C3HC4, zf-RING_UBOX, zf-C3HC4_4, zf-RING_2, zf-C3HC4_3, zf-RING_5,
Gohir.A13G053554.1	NEC	EC	3.56367	6.8536e-12	1.90688e-10	PF00170,PF14144	0	0	0	0	GO:0003700,GO:0006355,GO:0006351,GO:0043565	0	AT1G68640	transcription factor, putative, expressed; bZIP transcription factor family protein	bZIP transcription factor family protein	DOG1, bZIP_1, bZIP_2, FRG1	DOG1, bZIP_1, bZIP_2, FRG1
Gohir.D09G103200.1	NEC	EC	3.5629	6.30404e-16	3.6326e-14	PF00010	0	0	0	0	GO:0046983,GO:0003677	0	AT3G56970	helix-loop-helix DNA-binding domain containing protein, expressed; basic helix-loop-helix (bHLH) DNA-binding superfamily protein	basic helix-loop-helix (bHLH) DNA-binding superfamily protein	HLH, PIG-S, PolyA_pol_arg_C	HLH, PIG-S, PolyA_pol_arg_C
Gohir.A07G096600.1	NEC	EC	3.56216	0.000586206	0.00259715	PF00046	0	0	0	0	GO:0003677	0	NA	NA	WUSCHEL related homeobox 2	Homeodomain	Homeodomain
Gohir.D07G079675.1	NEC	EC	3.56118	1.02531e-07	1.1691e-06	PF14009	0	0	0	0	0	0	AT3G03280	expressed protein	0	DUF4228	DUF4228
Gohir.D01G156000.1	NEC	EC	3.56028	2.93182e-05	0.000184819	PF01190	0	0	SignalP-noTM	0	0	0	NA	NA	NA	Pollen_Ole_e_I	Pollen_Ole_e_I
Gohir.D01G057800.1	NEC	EC	3.55981	3.1541e-07	3.23129e-06	PF00954,PF01453,PF11883,PF07714,PF08276	KOG1187	2.7.11.1	SignalP-noTM	0	GO:0004674,GO:0006468,GO:0004672,GO:0048544	0	AT4G27300	serine/threonine-protein kinase receptor precursor, putative, expressed; S-locus lectin protein kinase family protein	S-locus lectin protein kinase family protein	Pkinase_Tyr, Pkinase, B_lectin, S_locus_glycop, PAN_2, DUF3403, APH, PAN_1, PAN_3, EB, Haspin_kinase, LapA_dom	Pkinase_Tyr, Pkinase, B_lectin, S_locus_glycop, PAN_2, DUF3403, APH, PAN_1, PAN_3, EB, Has
Gohir.A01G013700.1	NEC	EC	3.55925	2.2452e-13	8.25455e-12	0	0	0	0	0	0	0	NA	NA	0	EVI2A	EVI2A
Gohir.D11G250000.3	NEC	EC	3.55843	1.04797e-06	9.47579e-06	0	0	0	0	0	0	0	NA	NA	hydroxyproline-rich glycoprotein family protein	RicinB_lectin_2, HyaE, DUF1480	RicinB_lectin_2, HyaE, DUF1480
Gohir.D10G150900.1	NEC	EC	3.55664	1.76235e-08	2.39123e-07	0	0	0	0	0	0	0	AT5G18980	expressed protein; ARM repeat superfamily protein	ARM repeat superfamily protein	Arm, HEAT_PBS	Arm, HEAT_PBS
Gohir.D07G164700.1	NEC	EC	3.55575	4.02737e-10	7.83997e-09	0	0	0	0	0	0	0	NA	NA	0	#N/A	#N/A
Gohir.D06G140000.1	NEC	EC	3.55535	8.58145e-05	0.000480882	PF06884	0	0	0	0	0	0	AT5G45690	DUF1264 domain containing protein, putative, expressed; Protein of unknown function (DUF1264)	Protein of unknown function (DUF1264)	DUF1264, DUF4679	DUF1264, DUF4679
Gohir.D02G034700.1	NEC	EC	3.5497	3.28045e-08	4.17063e-07	PF00043	0	2.5.1.18	0	0	0	0	NA	NA	glutathione S-transferase TAU 8	GST_C_2, GST_C, GST_C_3	GST_C_2, GST_C, GST_C_3
Gohir.A05G019900.1	NEC	EC	3.54964	0.00500023	0.0164822	0	0	0	0	0	0	0	NA	NA	0	#N/A	#N/A
Gohir.A12G162000.1	NEC	EC	3.54747	0.000184937	0.000942511	PF13912	0	0	0	0	0	0	NA	NA	C2H2-like zinc finger protein	zf-C2H2_6, zf-C2H2_jaz, zf-C2H2_4, zf-C2H2_2, zf-C2HE, zf-C2H2, OTT_1508_deam, Zn_Tnp_IS91, zf-LYAR, TackOD1	zf-C2H2_6, zf-C2H2_jaz, zf-C2H2_4, zf-C2H2_2, zf-C2HE, zf-C2H2, OTT_1508_deam, Zn_Tnp_IS91
Gohir.A05G103100.1	NEC	EC	3.54631	6.14198e-05	0.000356545	0	0	0	SignalP-noTM	0	0	0	AT2G28410	0	0	#N/A	#N/A
Gohir.A01G171500.1	NEC	EC	3.54592	0.0232192	0.0593722	0	0	0	0	0	0	0	NA	NA	0	#N/A	#N/A
Gohir.D07G214500.1	NEC	EC	3.54318	8.42445e-08	9.81169e-07	PF00010	0	0	0	0	GO:0046983	0	AT4G02590	BHLH transcription factor, putative, expressed; basic helix-loop-helix (bHLH) DNA-binding superfamily protein	basic helix-loop-helix (bHLH) DNA-binding superfamily protein	HLH, DnaB	HLH, DnaB
Gohir.A13G089900.1	NEC	EC	3.54123	7.31024e-09	1.07386e-07	0	0	0	0	0	0	0	NA	NA	0	#N/A	#N/A
Gohir.A12G184100.1	NEC	EC	3.54118	9.00105e-05	0.000501597	PF01112	0	3.4.19.5	0	0	GO:0016787	0	AT5G08100	L-asparaginase precursor protein, putative, expressed; N-terminal nucleophile aminohydrolases (Ntn hydrolases) superfamily protein	N-terminal nucleophile aminohydrolases (Ntn hydrolases) superfamily protein	Asparaginase_2	Asparaginase_2
Gohir.D08G044300.1	NEC	EC	3.53759	6.69959e-07	6.34978e-06	0	0	0	0	0	0	0	AT5G41761	expressed protein	0	#N/A	#N/A
Gohir.D03G116600.5	NEC	EC	3.53657	7.78907e-19	7.19928e-17	PF05030	0	0	0	0	GO:0003713	0	NA	NA	GRF1-interacting factor 3	SSXT, Elf4, GreA_GreB_N, MAT1	SSXT, Elf4, GreA_GreB_N, MAT1
Gohir.1Z049439.1	NEC	EC	3.53608	0.00369172	0.0127692	0	0	2.7.1.160	0	0	0	0	NA	NA	RNA 2\'-phosphotransferase, Tpt1 / KptA family	#N/A	#N/A
Gohir.D12G150500.1	NEC	EC	3.53501	3.22862e-05	0.000201659	PF04059,PF00076	KOG4660	0	0	0	GO:0003676	0	AT3G26120	AML1, putative, expressed; terminal EAR1-like 1	terminal EAR1-like 1	RRM_2, RRM_1, RRM_occluded, RRM_5, Nup35_RRM_2	RRM_2, RRM_1, RRM_occluded, RRM_5, Nup35_RRM_2
Gohir.A07G083200.2	NEC	EC	3.53466	1.00237e-06	9.1221e-06	PF00892	0	0	0	0	GO:0016020,GO:0016021	0	AT2G05755	Nodulin MtN21 /EamA-like transporter family protein	Nodulin MtN21 /EamA-like transporter family protein	EamA	EamA
Gohir.A13G232450.1	NEC	EC	3.53448	9.10695e-06	6.57094e-05	0	0	0	0	0	0	0	NA	NA	ABC transporter family protein	ABC_tran	ABC_tran
Gohir.A11G126200.2	NEC	EC	3.53345	2.30781e-22	3.5551e-20	PF14309,PF14383	0	0	0	0	GO:0051513	0	NA	NA	0	DUF4378, VARLMGL	DUF4378, VARLMGL
Gohir.A05G128366.1	NEC	EC	3.53291	8.2896e-10	1.51481e-08	PF01740,PF00916	KOG0236	0	0	K17471	GO:0016021,GO:0016020,GO:0015116,GO:0008272,GO:1902358,GO:0055085,GO:0008271	0	AT3G15990	sulfate transporter, putative, expressed; sulfate transporter 3;4	sulfate transporter 3;4	Sulfate_transp, STAS, STAS_2	Sulfate_transp, STAS, STAS_2
Gohir.A11G021700.1	NEC	EC	3.53107	4.0797e-07	4.07917e-06	PF01429	0	0	0	0	GO:0005634,GO:0003677	0	NA	NA	methyl-CPG-binding domain protein 13	MBD, YL1_C, Phosducin	MBD, YL1_C, Phosducin
Gohir.D06G089800.1	NEC	EC	3.52779	0.000450759	0.00206333	PF01277	0	0	0	0	GO:0016021,GO:0012511	0	AT2G25890	oleosin, putative, expressed; Oleosin family protein	Oleosin family protein	Oleosin, DUF3810, Col_cuticle_N	Oleosin, DUF3810, Col_cuticle_N
Gohir.D05G185100.1	NEC	EC	3.52721	3.42828e-08	4.34067e-07	PF01388,PF00505	KOG0381	0	0	0	GO:0003677	0	AT1G76110	high mobility group, putative, expressed; HMG (high mobility group) box protein with ARID/BRIGHT DNA-binding domain	HMG (high mobility group) box protein with ARID/BRIGHT DNA-binding domain	ARID, HMG_box, HMG_box_2	ARID, HMG_box, HMG_box_2
Gohir.A10G193800.1	NEC	EC	3.52555	3.40747e-07	3.47239e-06	PF00847	0	0	0	0	GO:0003700,GO:0006355,GO:0007275	0	AT3G54320	AP2 domain containing protein, expressed; Integrase-type DNA-binding superfamily protein	Integrase-type DNA-binding superfamily protein	AP2, Kin17_mid, DUF719, Suf	AP2, Kin17_mid, DUF719, Suf
Gohir.D13G095200.3	NEC	EC	3.52434	6.63383e-15	3.24076e-13	PF00046,PF01852	0	0	0	K09338	GO:0003677,GO:0008289	0	AT1G05230	homeobox and START domains containing protein, putative, expressed; homeodomain GLABROUS 2	homeodomain GLABROUS 2	START, Homeodomain, Homeobox_KN, YabA, zf-Mss51, MRP-L20, zf_Rg, NRBF2, PikAIV_N	START, Homeodomain, Homeobox_KN, YabA, zf-Mss51, MRP-L20, zf_Rg, NRBF2, PikAIV_N
Gohir.A09G052800.1	NEC	EC	3.52402	6.18982e-13	2.08648e-11	PF03140	0	0	0	0	0	0	NA	NA	Plant protein of unknown function (DUF247)	DUF247, TMEM18, SprT-like	DUF247, TMEM18, SprT-like
Gohir.D08G151700.1	NEC	EC	3.52305	6.28204e-08	7.50371e-07	PF00249	KOG0048	0	0	K09422	0	0	AT3G61250	MYB family transcription factor, putative, expressed; myb domain protein 17	myb domain protein 17	Myb_DNA-binding, Myb_DNA-bind_6	Myb_DNA-binding, Myb_DNA-bind_6
Gohir.D02G158500.1	NEC	EC	3.52202	1.77987e-09	2.98675e-08	PF00847	0	0	0	0	GO:0003700,GO:0006355	0	NA	NA	Integrase-type DNA-binding superfamily protein	AP2	AP2
Gohir.A02G003400.3	NEC	EC	3.52127	2.16407e-15	1.13777e-13	PF02362,PF07496	0	0	0	0	GO:0008270,GO:0003677	0	AT4G32010	B3 DNA binding domain containing protein, putative, expressed; HSI2-like 1	HSI2-like 1	B3, zf-CW, TMEM51	B3, zf-CW, TMEM51
Gohir.D01G004550.1	NEC	EC	3.52037	4.65424e-07	4.58714e-06	PF08392	0	2.3.1.199	0	0	GO:0016747,GO:0006633,GO:0016020	0	AT1G19440	3-ketoacyl-CoA synthase, putative, expressed; 3-ketoacyl-CoA synthase 4	3-ketoacyl-CoA synthase 4	FAE1_CUT1_RppA, ACP_syn_III, Chal_sti_synt_N, Apq12	FAE1_CUT1_RppA, ACP_syn_III, Chal_sti_synt_N, Apq12
Gohir.D09G001700.1	NEC	EC	3.5187	1.12814e-18	9.9686e-17	PF00005,PF01061	KOG0061	3.6.3.29	0	0	GO:0016020,GO:0016887,GO:0005524	0	AT1G53270	ABC-2 type transporter domain containing protein, expressed; ABC-2 type transporter family protein	ABC-2 type transporter family protein	ABC2_membrane, ABC_tran, AAA_21, PDR_CDR, AAA_13, Rad17, ABC2_membrane_3, RsgA_GTPase, AAA_22, AAA_16, SMC_N, AAA_29, AAA_33, AAA_23, AAA_18, AAA_30, AAA, AAA_25, cobW, AAA_28	ABC2_membrane, ABC_tran, AAA_21, PDR_CDR, AAA_13, Rad17, ABC2_membrane_3, RsgA_GTPase, AAA
Gohir.D06G152400.1	NEC	EC	3.51844	0.000312302	0.00149099	PF00046,PF01852	KOG0484	0	0	K09338	GO:0008289,GO:0003677	0	AT4G04890	homeobox and START domains containing protein, putative, expressed; protodermal factor 2	protodermal factor 2	START, Homeodomain, Homeobox_KN, Zn_ribbon_SprT, YabA, zf-Mss51, NRBF2, HALZ, DivIC, ZapB	START, Homeodomain, Homeobox_KN, Zn_ribbon_SprT, YabA, zf-Mss51, NRBF2, HALZ, DivIC, ZapB
Gohir.A08G016600.2	NEC	EC	3.51831	7.74353e-05	0.00043893	PF00249,PF14379	0	0	0	0	0	0	NA	NA	myb-like HTH transcriptional regulator family protein	Myb_CC_LHEQLE, Myb_DNA-binding, YebO	Myb_CC_LHEQLE, Myb_DNA-binding, YebO
Gohir.D01G154266.1	NEC	EC	3.51478	0.000329416	0.0015614	PF03763	0	0	0	0	0	0	AT1G67590	remorin family protein, putative, expressed; Remorin family protein	Remorin family protein	Remorin_C	Remorin_C
Gohir.A11G089500.1	NEC	EC	3.51401	9.13987e-10	1.65061e-08	PF07690	KOG2532	0	0	0	GO:0016021,GO:0055085	0	AT4G00370	transporter, major facilitator family, putative, expressed; Major facilitator superfamily protein	Major facilitator superfamily protein	MFS_1, OATP	MFS_1, OATP
Gohir.A12G244900.1	NEC	EC	3.51335	5.8442e-09	8.78036e-08	PF04654	0	0	0	0	0	0	AT5G24600	expressed protein; Protein of unknown function, DUF599	Protein of unknown function, DUF599	DUF599	DUF599
Gohir.D03G113300.1	NEC	EC	3.51325	2.07252e-17	1.52515e-15	PF00400	KOG0646	0	0	K14829	GO:0005515	0	NA	NA	Transducin/WD40 repeat-like superfamily protein	WD40, ANAPC4_WD40	WD40, ANAPC4_WD40
Gohir.A03G028300.1	NEC	EC	3.5125	1.30349e-18	1.1409e-16	PF13639	0	0	0	0	0	0	NA	NA	RING/U-box superfamily protein	zf-RING_2, zf-rbx1, zf-C3HC4_2, zf-C3HC4, zf-ANAPC11, zf-RING_11, Prok-RING_4, zf-RING_5, zf-RING_UBOX, Zn_ribbon_17, zf-C3HC4_3, zf-C3H2C3, zf-RING_6, zf-RING-like, FANCL_C, RINGv	zf-RING_2, zf-rbx1, zf-C3HC4_2, zf-C3HC4, zf-ANAPC11, zf-RING_11, Prok-RING_4, zf-RING_5,
Gohir.A03G192400.1	NEC	EC	3.50527	4.16298e-06	3.25529e-05	PF02362	0	0	0	0	GO:0003677	0	NA	NA	Transcriptional factor B3 family protein / auxin-responsive factor AUX/IAA-related	B3, MazE_antitoxin	B3, MazE_antitoxin
Gohir.A09G228700.1	NEC	EC	3.50466	4.07145e-08	5.06755e-07	PF05199,PF00732	0	1.1.3.20	0	0	GO:0016614,GO:0050660,GO:0055114	0	AT3G23410	alcohol oxidase, putative, expressed; fatty alcohol oxidase 3	fatty alcohol oxidase 3	GMC_oxred_N, GMC_oxred_C, FAD_binding_2, NAD_binding_8, Pyr_redox_2, FAD_binding_3, Thi4, HI0933_like, FAD_oxidored, GIDA, DAO	GMC_oxred_N, GMC_oxred_C, FAD_binding_2, NAD_binding_8, Pyr_redox_2, FAD_binding_3, Thi4,
Gohir.A12G084825.1	NEC	EC	3.50435	8.79344e-07	8.12273e-06	PF08240,PF00107	KOG0023	1.1.1.195	0	K00083	GO:0055114	0	AT4G37990	dehydrogenase, putative, expressed; elicitor-activated gene 3-2	elicitor-activated gene 3-2	ADH_N, ADH_zinc_N, ADH_zinc_N_2	ADH_N, ADH_zinc_N, ADH_zinc_N_2
Gohir.A07G231000.1	NEC	EC	3.50397	1.49958e-08	2.06685e-07	PF03097	0	0	0	0	0	0	AT5G14020	expressed protein; Endosomal targeting BRO1-like domain-containing protein	Endosomal targeting BRO1-like domain-containing protein	BRO1	BRO1
Gohir.D07G108200.1	NEC	EC	3.50384	3.52464e-06	2.80309e-05	PF00403	KOG1603	0	0	0	GO:0046872,GO:0030001	0	AT1G06330	heavy metal-associated domain containing protein, expressed; Heavy metal transport/detoxification superfamily protein	Heavy metal transport/detoxification superfamily protein	HMA, Peptidase_M16_C	HMA, Peptidase_M16_C
Gohir.A07G095200.1	NEC	EC	3.50369	5.5514e-06	4.22308e-05	PF08541,PF08392	0	2.3.1.199	SignalP-noTM	0	GO:0016020,GO:0006633,GO:0016747	K15397	AT2G28630	3-ketoacyl-CoA synthase precursor, putative, expressed; 3-ketoacyl-CoA synthase 12	3-ketoacyl-CoA synthase 12	FAE1_CUT1_RppA, ACP_syn_III_C, Chal_sti_synt_C, ACP_syn_III	FAE1_CUT1_RppA, ACP_syn_III_C, Chal_sti_synt_C, ACP_syn_III
Gohir.A13G044200.1	NEC	EC	3.50257	2.57021e-12	7.72299e-11	0	0	0	0	0	0	0	AT3G19500	bHelix-loop-helix transcription factor, putative, expressed; basic helix-loop-helix (bHLH) DNA-binding superfamily protein	basic helix-loop-helix (bHLH) DNA-binding superfamily protein	HLH, Tom22	HLH, Tom22
Gohir.A11G322600.1	NEC	EC	3.50171	7.18408e-07	6.76171e-06	PF00076,PF00658	KOG0123	0	0	0	GO:0003676,GO:0003723	0	AT2G36660	polyadenylate-binding protein, putative, expressed; poly(A) binding protein 7	poly(A) binding protein 7	RRM_1, PABP, RRM_3, RRM_7, RRM_occluded, Nup35_RRM_2, OB_RNB	RRM_1, PABP, RRM_3, RRM_7, RRM_occluded, Nup35_RRM_2, OB_RNB
Gohir.D04G014000.3	NEC	EC	3.50059	2.65867e-06	2.19172e-05	PF00651	0	0	0	0	GO:0005515	0	AT3G56230	BTB9 - Bric-a-Brac, Tramtrack, Broad Complex BTB domain, expressed; BTB/POZ domain-containing protein	BTB/POZ domain-containing protein	BTB, BACK	BTB, BACK
Gohir.A05G182100.1	NEC	EC	3.50045	1.3067e-12	4.11924e-11	PF00505,PF01388	KOG0381	0	0	0	GO:0003677	0	AT1G76110	high mobility group, putative, expressed; HMG (high mobility group) box protein with ARID/BRIGHT DNA-binding domain	HMG (high mobility group) box protein with ARID/BRIGHT DNA-binding domain	ARID, HMG_box, HMG_box_2	ARID, HMG_box, HMG_box_2
Gohir.A07G048600.1	NEC	EC	3.498	5.52046e-11	1.28009e-09	PF13589	KOG1845	0	0	0	0	0	AT5G50780	ATP-binding region, ATPase-like domain containing protein, expressed; Histidine kinase-, DNA gyrase B-, and HSP90-like ATPase family protein	Histidine kinase-, DNA gyrase B-, and HSP90-like ATPase family protein	Morc6_S5, HATPase_c_3, HATPase_c, DUF4407, Phage_GP20, Spc7	Morc6_S5, HATPase_c_3, HATPase_c, DUF4407, Phage_GP20, Spc7
Gohir.D11G219200.1	NEC	EC	3.49718	2.92272e-05	0.000184296	PF00069	KOG0583	2.7.11.1	0	K14498	GO:0005524,GO:0006468,GO:0004672	0	AT4G33950	CAMK_CAMK_like.20 - CAMK includes calcium/calmodulin depedent protein kinases, expressed; Protein kinase superfamily protein	Protein kinase superfamily protein	Pkinase, Pkinase_Tyr, Choline_kinase, Pkinase_fungal, APH	Pkinase, Pkinase_Tyr, Choline_kinase, Pkinase_fungal, APH
Gohir.D10G210100.1	NEC	EC	3.49711	2.42248e-06	2.01644e-05	PF00112,PF08246	KOG1542	3.4.22.15	0	K01373	GO:0008234,GO:0006508	0	AT3G54940	cysteine proteinase A494 precursor, putative, expressed; Papain family cysteine protease	Papain family cysteine protease	Peptidase_C1, Inhibitor_I29, Peptidase_C1_2, CHAD, Phage_int_SAM_4	Peptidase_C1, Inhibitor_I29, Peptidase_C1_2, CHAD, Phage_int_SAM_4
Gohir.A13G103750.1	NEC	EC	3.49632	0.00635953	0.0201674	0	0	0	0	0	0	0	NA	NA	NA	BTV_NS2	BTV_NS2
Gohir.A11G274100.1	NEC	EC	3.49214	2.06527e-12	6.30412e-11	PF01344,PF13418	KOG4152	0	0	0	GO:0005515	0	NA	NA	Galactose oxidase/kelch repeat superfamily protein	Kelch_4, Kelch_3, Kelch_6, Kelch_1, Kelch_5, Kelch_2	Kelch_4, Kelch_3, Kelch_6, Kelch_1, Kelch_5, Kelch_2
Gohir.A11G244400.1	NEC	EC	3.49154	0.000879543	0.00370423	PF03080,PF14365	0	0	SignalP-TM	0	0	0	AT5G18460	carboxyl-terminal peptidase, putative, expressed; Protein of Unknown Function (DUF239)	Protein of Unknown Function (DUF239)	Neprosin, Neprosin_AP	Neprosin, Neprosin_AP
Gohir.D04G025500.1	NEC	EC	3.4869	0.000129038	0.000687308	PF06775	KOG4200	0	0	0	GO:0019915	0	AT5G16460	protein of unknown function containing protein, expressed; Putative adipose-regulatory protein (Seipin)	Putative adipose-regulatory protein (Seipin)	Seipin	Seipin
Gohir.D11G296792.1	NEC	EC	3.48577	2.06781e-06	1.7515e-05	PF00646	0	0	0	0	GO:0005515	0	NA	NA	F-box/RNI-like superfamily protein	F-box, F-box-like	F-box, F-box-like
Gohir.A05G309500.1	NEC	EC	3.48406	6.58738e-10	1.22952e-08	PF02183,PF00046	KOG0483	0	0	0	GO:0043565,GO:0003677,GO:0003700,GO:0006355	0	AT2G01430	homeobox associated leucine zipper, putative, expressed; homeobox-leucine zipper protein 17	homeobox-leucine zipper protein 17	Homeodomain, HALZ, Homeobox_KN, bZIP_1, YabA, Homez	Homeodomain, HALZ, Homeobox_KN, bZIP_1, YabA, Homez
Gohir.A05G159400.1	NEC	EC	3.48121	9.45403e-07	8.66023e-06	0	0	0	0	0	0	0	NA	NA	0	#N/A	#N/A
Gohir.D13G129200.1	NEC	EC	3.4789	4.5006e-11	1.06389e-09	PF01464	0	0	0	0	0	0	AT1G16290	transglycosylase SLT domain containing protein, expressed	0	SLT	SLT
Gohir.D12G089500.1	NEC	EC	3.47676	3.36086e-08	4.26466e-07	PF03195	0	0	0	0	0	0	AT5G66870	DUF260 domain containing protein, putative, expressed; ASYMMETRIC LEAVES 2-like 1	ASYMMETRIC LEAVES 2-like 1	LOB, Clathrin_H_link	LOB, Clathrin_H_link
Gohir.A10G019300.1	NEC	EC	3.47119	0.00023087	0.00114737	PF02984,PF00134	KOG0656	0	0	0	GO:0005634,GO:0051726	0	AT4G03270	cyclin, putative, expressed; Cyclin D6;1	Cyclin D6;1	Cyclin_N, Cyclin_C, TFIIB	Cyclin_N, Cyclin_C, TFIIB
Gohir.D13G062300.1	NEC	EC	3.47075	1.45429e-07	1.60632e-06	PF03169	0	0	0	0	GO:0055085	0	AT1G65730	YELLOW STRIPE like 7	YELLOW STRIPE like 7	OPT, TMEM65	OPT, TMEM65
Gohir.A08G217700.1	NEC	EC	3.47017	1.63468e-06	1.4147e-05	PF00168	0	0	0	0	0	0	AT3G04360	C2 domain containing protein, putative, expressed; Calcium-dependent lipid-binding (CaLB domain) family protein	Calcium-dependent lipid-binding (CaLB domain) family protein	C2	C2
Gohir.A06G101600.2	NEC	EC	3.46662	8.0495e-14	3.23478e-12	0	0	0	0	0	0	0	NA	NA	myosin heavy chain-related	#N/A	#N/A
Gohir.D08G247950.1	NEC	EC	3.46589	1.90091e-08	2.56267e-07	PF02458	0	2.3.1.188	0	0	GO:0016747	0	AT1G65450	transferase family protein, putative, expressed; HXXXD-type acyl-transferase family protein	HXXXD-type acyl-transferase family protein	Transferase	Transferase
Gohir.D07G045366.1	NEC	EC	3.46514	4.07613e-16	2.4275e-14	0	0	0	0	0	0	0	NA	NA	NA	#N/A	#N/A
Gohir.A12G041500.1	NEC	EC	3.46401	1.39646e-05	9.58364e-05	PF04059	0	0	0	0	0	0	NA	NA	MEI2 C-terminal RRM only like 2	RRM_2, RRM_1, PAM2	RRM_2, RRM_1, PAM2
Gohir.A13G036600.1	NEC	EC	3.46378	1.51277e-13	5.75875e-12	PF04833	0	0	0	0	GO:0010215,GO:0016049,GO:0031225	0	AT1G09790	COBRA, putative, expressed; COBRA-like protein 6 precursor	COBRA-like protein 6 precursor	COBRA	COBRA
Gohir.A05G375500.1	NEC	EC	3.45693	0.0195056	0.0514429	PF00304	0	0	SignalP-noTM	0	0	0	AT2G02130	DEF8 - Defensin and Defensin-like DEFL family, expressed; low-molecular-weight cysteine-rich 68	low-molecular-weight cysteine-rich 69	Gamma-thionin	Gamma-thionin
Gohir.A12G274900.3	NEC	EC	3.45665	3.80418e-11	9.11386e-10	0	0	0	0	0	0	0	AT5G62960	expressed protein	0	#N/A	#N/A
Gohir.A11G266600.1	NEC	EC	3.45462	1.03639e-14	4.88731e-13	PF16211,PF00125	KOG1756	0	0	0	GO:0003677	0	AT5G27670	Core histone H2A/H2B/H3/H4 domain containing protein, putative, expressed; histone H2A 7	histone H2A 7	Histone_H2A_C, Histone, CBFD_NFYB_HMF	Histone_H2A_C, Histone, CBFD_NFYB_HMF
Gohir.D10G033600.1	NEC	EC	3.45373	5.03081e-13	1.72986e-11	PF00657	0	3.1.1.3	SignalP-noTM	0	GO:0016788	0	AT1G29660	GDSL-like lipase/acylhydrolase, putative, expressed; GDSL-like Lipase/Acylhydrolase superfamily protein	GDSL-like Lipase/Acylhydrolase superfamily protein	Lipase_GDSL	Lipase_GDSL
Gohir.D09G109600.1	NEC	EC	3.45225	3.6742e-14	1.55779e-12	PF04646	KOG2246	2.4.1.122	0	0	0	0	AT5G12460	fringe-related protein, putative, expressed; Protein of unknown function (DUF604)	Protein of unknown function (DUF604)	DUF604, Fringe, Galactosyl_T	DUF604, Fringe, Galactosyl_T
Gohir.A04G065100.1	NEC	EC	3.4521	2.09964e-11	5.29654e-10	0	0	0	0	0	0	0	AT3G52610	0	0	#N/A	#N/A
Gohir.D03G011200.1	NEC	EC	3.45076	1.21855e-15	6.67227e-14	PF00171	KOG2456	1.2.1.3	0	K00128	GO:0016491,GO:0008152,GO:0055114	0	AT4G36250	aldehyde dehydrogenase, putative, expressed; aldehyde dehydrogenase 3F1	aldehyde dehydrogenase 3F1	Aldedh, DUF2777	Aldedh, DUF2777
Gohir.D07G122200.1	NEC	EC	3.44867	3.27453e-07	3.34577e-06	PF00069	KOG0583	2.7.11.1	0	0	GO:0004672,GO:0006468,GO:0005524	0	AT3G45240	CAMK_KIN1/SNF1/Nim1_like.18 - CAMK includes calcium/calmodulin depedent protein kinases, expressed; geminivirus rep interacting kinase 1	geminivirus rep interacting kinase 2	Pkinase, Pkinase_Tyr, Kinase-like, Pkinase_fungal, Seadorna_VP7, APH, WaaY, RIO1, FTA2	Pkinase, Pkinase_Tyr, Kinase-like, Pkinase_fungal, Seadorna_VP7, APH, WaaY, RIO1, FTA2
Gohir.D01G005500.1	NEC	EC	3.44854	3.51925e-08	4.44368e-07	0	0	0	0	0	0	0	NA	NA	0	B3	B3
Gohir.D09G157350.1	NEC	EC	3.44582	8.55842e-12	2.32385e-10	PF04043	0	0	SignalP-noTM	0	GO:0004857	0	NA	NA	NA	PMEI, Lsm_C	PMEI, Lsm_C
Gohir.D08G150200.1	NEC	EC	3.44559	0.00116032	0.00471667	PF01988	KOG4473	0	0	0	0	0	NA	NA	vacuolar iron transporter 1	VIT1	VIT1
Gohir.D01G172600.1	NEC	EC	3.44481	5.6124e-10	1.05781e-08	PF00501,PF13193	KOG1256	6.2.1.3	0	K01897	GO:0003824,GO:0008152	0	AT1G49430	AMP-binding enzyme, putative, expressed; long-chain acyl-CoA synthetase 2	long-chain acyl-CoA synthetase 2	AMP-binding, AMP-binding_C	AMP-binding, AMP-binding_C
Gohir.A09G030400.1	NEC	EC	3.44154	6.20284e-23	1.0462e-20	0	0	0	0	0	0	0	AT5G14410	expressed protein	0	#N/A	#N/A
Gohir.A07G203200.1	NEC	EC	3.44018	1.43562e-08	1.98462e-07	PF05899	0	0	0	0	0	0	AT3G04300	enzyme of the cupin superfamily protein, putative, expressed; RmlC-like cupins superfamily protein	RmlC-like cupins superfamily protein	Cupin_3, Ppnp, Cupin_2, DUF5026, EutQ	Cupin_3, Ppnp, Cupin_2, DUF5026, EutQ
Gohir.D01G063600.1	NEC	EC	3.43892	8.27736e-08	9.65254e-07	PF00190	0	0	SignalP-noTM	0	GO:0045735	0	NA	NA	germin-like protein 5	Cupin_1, Cupin_2, Cupin_4	Cupin_1, Cupin_2, Cupin_4
Gohir.A11G042675.1	NEC	EC	3.43887	4.32249e-10	8.35447e-09	PF00067	KOG0156	0	0	K09755	GO:0005506,GO:0020037,GO:0016705,GO:0055114	0	AT4G36220	cytochrome P450, putative, expressed; ferulic acid 5-hydroxylase 1	ferulic acid 5-hydroxylase 1	p450, DUF5311	p450, DUF5311
Gohir.D07G003100.2	NEC	EC	3.43872	8.29597e-10	1.51537e-08	PF01061,PF00005,PF08370	KOG0065	3.6.3.34	0	0	GO:0016887,GO:0016020,GO:0005524	0	AT3G30842	pleiotropic drug resistance protein, putative, expressed; pleiotropic drug resistance 10	pleiotropic drug resistance 10	ABC2_membrane, PDR_assoc, ABC_tran, AAA_21, RsgA_GTPase, SMC_N, AAA_29, PDR_CDR, AAA_16, ABC2_membrane_3	ABC2_membrane, PDR_assoc, ABC_tran, AAA_21, RsgA_GTPase, SMC_N, AAA_29, PDR_CDR, AAA_16, A
Gohir.A04G136350.1	NEC	EC	3.43742	2.26528e-10	4.64866e-09	PF04864	0	2.6.1.99	0	0	GO:0016846	0	AT1G70560	alliin lyase precursor, putative, expressed; tryptophan aminotransferase of Arabidopsis 1	tryptophan aminotransferase of Arabidopsis 1	Alliinase_C, Aminotran_1_2	Alliinase_C, Aminotran_1_2
Gohir.D02G117600.1	NEC	EC	3.43715	1.9507e-12	6.00997e-11	PF00010	0	0	0	0	GO:0046983,GO:0003677	0	NA	NA	basic helix-loop-helix (bHLH) DNA-binding superfamily protein	HLH, PIN_5, TFIIB_C_1, SlyX	HLH, PIN_5, TFIIB_C_1, SlyX
Gohir.A10G074000.1	NEC	EC	3.43582	0.0293535	0.0720761	PF17181	0	0	SignalP-noTM	0	0	0	NA	NA	0	EPF	EPF
Gohir.D01G168300.1	NEC	EC	3.43381	1.15465e-22	1.87232e-20	PF00141	0	1.11.1.7	SignalP-noTM	K00430	GO:0006979,GO:0020037,GO:0055114,GO:0004601	0	AT4G25980	peroxidase precursor, putative, expressed; Peroxidase superfamily protein	Peroxidase superfamily protein	peroxidase	peroxidase
Gohir.A01G040500.1	NEC	EC	3.43353	1.62913e-10	3.45518e-09	PF04535	0	0	0	0	0	0	AT1G17200	membrane associated DUF588 domain containing protein, putative, expressed; Uncharacterised protein family (UPF0497)	Uncharacterised protein family (UPF0497)	DUF588	DUF588
Gohir.D13G121800.1	NEC	EC	3.43182	8.82987e-05	0.000493009	0	0	0	0	0	0	0	NA	NA	NA	#N/A	#N/A
Gohir.D02G007150.1	NEC	EC	3.43027	4.05078e-15	2.02381e-13	0	0	0	0	0	GO:0010155,GO:0005783,GO:0005886	0	NA	NA	NA	RapH_N	RapH_N
Gohir.D06G080800.1	NEC	EC	3.42991	3.64623e-09	5.71985e-08	PF00550	KOG1748	0	0	0	0	0	AT5G27200	acyl carrier protein, putative, expressed; acyl carrier protein 5	acyl carrier protein 4	PP-binding, PP-binding_2	PP-binding, PP-binding_2
Gohir.A07G026600.1	NEC	EC	3.42976	1.75976e-16	1.11405e-14	PF00171	KOG2450	1.2.1.9	0	K00131	GO:0016491,GO:0008152,GO:0055114	0	AT2G24270	aldehyde dehydrogenase, putative, expressed; aldehyde dehydrogenase 11A3	aldehyde dehydrogenase 11A3	Aldedh, DUF5356, DUF1487	Aldedh, DUF5356, DUF1487
Gohir.A11G030971.1	NEC	EC	3.42948	2.3698e-12	7.1721e-11	PF00249	KOG0048	0	0	0	0	0	AT5G62470	MYB family transcription factor, putative, expressed; myb domain protein 96	myb domain protein 96	Myb_DNA-binding, Myb_DNA-bind_6, SLIDE, tRNA_bind_3	Myb_DNA-binding, Myb_DNA-bind_6, SLIDE, tRNA_bind_3
Gohir.A11G056900.1	NEC	EC	3.42749	9.34551e-11	2.07342e-09	PF00743	KOG1399	1.14.13.168	0	K11816	GO:0050661,GO:0004499,GO:0050660,GO:0055114	0	AT1G48910	flavin monooxygenase, putative, expressed; Flavin-containing monooxygenase family protein	Flavin-containing monooxygenase family protein	FMO-like, Pyr_redox_3, K_oxygenase, Pyr_redox_2, FAD_binding_3, Thi4, NAD_binding_8, Pyr_redox, DAO, NAD_binding_9, FAD_binding_2, GIDA, HI0933_like, Shikimate_DH, NAD_binding_7, 2-Hacid_dh_C, ThiF, TrkA_N, Lycopene_cycl	FMO-like, Pyr_redox_3, K_oxygenase, Pyr_redox_2, FAD_binding_3, Thi4, NAD_binding_8, Pyr_r
Gohir.A01G184100.3	NEC	EC	3.42724	0.00146581	0.00578141	0	0	0	0	0	0	0	AT1G09812	expressed protein	0	#N/A	#N/A
Gohir.D07G198200.1	NEC	EC	3.42696	8.08955e-10	1.48295e-08	0	0	0	0	0	0	0	AT4G13500	expressed protein	0	#N/A	#N/A
Gohir.D02G134200.1	NEC	EC	3.42677	2.17597e-20	2.51401e-18	PF00046,PF01852	KOG0483	0	0	K09338	GO:0003677,GO:0008289	0	AT1G05230	homeobox and START domains containing protein, putative, expressed; homeodomain GLABROUS 2	homeodomain GLABROUS 2	START, Homeodomain, Homeobox_KN, MRP-L20, NRBF2, zf-Mss51, YabA, PikAIV_N	START, Homeodomain, Homeobox_KN, MRP-L20, NRBF2, zf-Mss51, YabA, PikAIV_N
Gohir.D05G142000.1	NEC	EC	3.42641	1.4175e-07	1.56981e-06	0	0	0	0	0	0	0	AT1G54120	expressed protein	0	Adhes-Ig_like	Adhes-Ig_like
Gohir.D09G015000.1	NEC	EC	3.42634	0.0229817	0.0588571	PF04770	0	0	0	0	0	0	AT3G28920	ZF-HD protein dimerisation region containing protein, expressed; homeobox protein 34	homeobox protein 34	ZF-HD_dimer, Pex14_N	ZF-HD_dimer, Pex14_N
Gohir.D06G083700.1	NEC	EC	3.42485	2.88581e-11	7.08633e-10	PF00924	KOG4629	0	0	0	GO:0016020,GO:0055085	0	AT5G12080	uncharacterized mscS family protein, putative, expressed; mechanosensitive channel of small conductance-like 10	mechanosensitive channel of small conductance-like 10	MS_channel	MS_channel
Gohir.D12G074700.1	NEC	EC	3.42426	3.13734e-07	3.21681e-06	PF00134,PF02984	KOG0656	0	0	0	GO:0005634	0	AT4G37630	cyclin, putative, expressed; cyclin d5;1	cyclin d5;1	Cyclin_N, Cyclin_C, Phage_connect_1, TFIIB	Cyclin_N, Cyclin_C, Phage_connect_1, TFIIB
Gohir.A09G226300.1	NEC	EC	3.4225	7.40711e-10	1.3698e-08	PF13639	0	0	0	0	0	0	AT5G43420	RING-H2 finger protein ATL5G, putative, expressed; RING/U-box superfamily protein	RING/U-box superfamily protein	zf-RING_2, zf-RING_11, zf-rbx1, zf-C3HC4_2, zf-C3HC4, zf-RING_UBOX, zf-RING_5, zf-ANAPC11, Prok-RING_4, Zn_ribbon_17, zf-C3HC4_3, RINGv, zf-RING_4, Prok-RING_1, Tmpp129, FANCL_C, PHD, Baculo_RING, zf-Nse, zf-RING-like, zf-C3HC4_4	zf-RING_2, zf-RING_11, zf-rbx1, zf-C3HC4_2, zf-C3HC4, zf-RING_UBOX, zf-RING_5, zf-ANAPC11,
Gohir.A02G106800.1	NEC	EC	3.42172	7.14122e-09	1.0517e-07	0	KOG2462	0	0	0	0	0	AT3G57670	ZOS6-05 - C2H2 zinc finger protein, expressed; C2H2-type zinc finger family protein	C2H2-type zinc finger family protein	zf-H2C2_2, zf-C2H2, zf-C2H2_6, zf-C2H2_4, zf-met, NeA_P2, Elf1, zf-C2H2_3rep, zf-C2H2_2, zf-C2H2_jaz	zf-H2C2_2, zf-C2H2, zf-C2H2_6, zf-C2H2_4, zf-met, NeA_P2, Elf1, zf-C2H2_3rep, zf-C2H2_2, z
Gohir.D03G002200.1	NEC	EC	3.42007	2.58509e-07	2.70288e-06	PF02042	0	0	0	0	0	0	AT4G35590	RWP-RK domain-containing protein, putative, expressed; RWP-RK domain-containing protein	RWP-RK domain-containing protein	RWP-RK, DUF3020	RWP-RK, DUF3020
Gohir.D09G041050.1	NEC	EC	3.41908	3.26679e-12	9.62828e-11	PF01852,PF00046	KOG0483	0	0	0	GO:0008289,GO:0003677	0	AT4G00730	homeobox and START domains containing protein, putative, expressed; Homeobox-leucine zipper family protein / lipid-binding START domain-containing protein	Homeobox-leucine zipper family protein / lipid-binding START domain-containing protein	START, Homeodomain, Homeobox_KN, Cep57_CLD_2	START, Homeodomain, Homeobox_KN, Cep57_CLD_2
Gohir.D13G125150.1	NEC	EC	3.41867	0.00309564	0.0109955	0	0	0	0	0	0	0	NA	NA	NA	SYCP2_ARLD, HCMV_UL139	SYCP2_ARLD, HCMV_UL139
Gohir.A05G170500.2	NEC	EC	3.41813	6.24551e-06	4.71079e-05	PF04520	0	0	0	0	0	0	AT4G21970	DUF584 domain containing protein, putative, expressed; Protein of unknown function, DUF584	Protein of unknown function, DUF584	Senescence_reg	Senescence_reg
Gohir.D08G274100.1	NEC	EC	3.41693	2.79883e-07	2.90533e-06	PF00847	0	0	0	0	GO:0003700,GO:0006355	0	AT5G11190	AP2 domain containing protein, expressed; Integrase-type DNA-binding superfamily protein	Integrase-type DNA-binding superfamily protein	AP2, DUF98	AP2, DUF98
Gohir.D02G132532.1	NEC	EC	3.41673	5.11421e-06	3.92018e-05	0	0	2.2.1.9	0	0	0	0	AT1G68890	hydrolase, alpha/beta fold family domain containing protein, expressed; magnesium ion binding;thiamin pyrophosphate binding;hydro-lyases;catalytics;2-succinyl-5-enolpyruvyl-6-hydroxy-3-cyclohexene-1-carboxylic-acid synthases	magnesium ion binding;thiamin pyrophosphate binding;hydro-lyases;catalytics;2-succinyl-5-enolpyruvyl-6-hydroxy-3-cyclohexene-1-carboxylic-acid synthases	#N/A	#N/A
Gohir.A03G135000.1	NEC	EC	3.41587	2.56993e-08	3.36831e-07	PF00847	0	0	0	0	GO:0006355,GO:0003700	0	NA	NA	DORNROSCHEN-like	AP2	AP2
Gohir.A05G225400.1	NEC	EC	3.41545	2.47018e-06	2.05281e-05	PF00076	KOG0149	0	0	0	GO:0003676	0	AT1G78260	RNA recognition motif containing protein, putative, expressed; RNA-binding (RRM/RBD/RNP motifs) family protein	RNA-binding (RRM/RBD/RNP motifs) family protein	RRM_1, Nup35_RRM_2, RRM_7	RRM_1, Nup35_RRM_2, RRM_7
Gohir.D05G054701.1	NEC	EC	3.41544	7.73112e-08	9.07508e-07	PF02298	0	0	SignalP-noTM	0	GO:0009055	0	AT4G30590	plastocyanin-like domain containing protein, putative, expressed; early nodulin-like protein 12	early nodulin-like protein 14	Cu_bind_like, B3	Cu_bind_like, B3
Gohir.A03G148700.1	NEC	EC	3.41511	9.09341e-13	2.96363e-11	PF14380,PF13947,PF00069	KOG1187	2.7.11.1	SignalP-TM	0	GO:0030247,GO:0005524,GO:0004672,GO:0006468	0	AT1G25390	OsWAK1 - OsWAK receptor-like cytoplasmic kinase OsWAK-RLCK, expressed; Protein kinase superfamily protein	Protein kinase superfamily protein	Pkinase, Pkinase_Tyr, WAK_assoc, GUB_WAK_bind, APH, Kinase-like, Kdo, Haspin_kinase, ABC1, Pkinase_fungal	Pkinase, Pkinase_Tyr, WAK_assoc, GUB_WAK_bind, APH, Kinase-like, Kdo, Haspin_kinase, ABC1,
Gohir.D08G158500.1	NEC	EC	3.41466	6.12397e-17	4.13762e-15	PF00320	KOG1601	0	0	0	GO:0006355,GO:0008270,GO:0003700,GO:0043565	0	AT3G60530	GATA zinc finger domain containing protein, expressed; GATA transcription factor 4	GATA transcription factor 4	GATA	GATA
Gohir.A07G222300.1	NEC	EC	3.41411	8.84421e-10	1.60285e-08	PF07690	KOG2533	0	0	K02575	GO:0055085,GO:0016021	0	AT5G14570	transporter, major facilitator family, putative, expressed; high affinity nitrate transporter 2.7	high affinity nitrate transporter 2.7	MFS_1, MFS_4	MFS_1, MFS_4
Gohir.D04G072425.1	NEC	EC	3.41116	5.42202e-06	4.13692e-05	0	0	0	0	0	0	0	NA	NA	NA	#N/A	#N/A
Gohir.A03G006140.1	NEC	EC	3.41101	6.39252e-06	4.80911e-05	PF05553	0	0	0	0	0	0	NA	NA	hydroxyproline-rich glycoprotein family protein	DUF761	DUF761
Gohir.A10G212601.1	NEC	EC	3.41062	0.000461525	0.0021054	PF05056	0	0	0	0	0	0	NA	NA	Protein of unknown function (DUF674)	DUF674, Vps39_2, zf-GRF	DUF674, Vps39_2, zf-GRF
Gohir.A07G029600.1	NEC	EC	3.41043	0.0206095	0.053841	0	0	0	0	0	0	0	NA	NA	0	#N/A	#N/A
Gohir.D04G106500.1	NEC	EC	3.41014	6.3501e-15	3.10544e-13	PF00076,PF00658	KOG0123	0	0	K13126	GO:0003676,GO:0003723	0	AT2G36660	polyadenylate-binding protein, putative, expressed; poly(A) binding protein 7	poly(A) binding protein 7	RRM_1, PABP, RRM_occluded, RRM_3, Nup35_RRM_2, RRM_7, Nup35_RRM, SET_assoc, PHM7_cyt, GNAT_acetyltran, OB_RNB, DUF4651, DUF5526, TC1	RRM_1, PABP, RRM_occluded, RRM_3, Nup35_RRM_2, RRM_7, Nup35_RRM, SET_assoc, PHM7_cyt, GNAT
Gohir.A07G179200.1	NEC	EC	3.40973	6.90766e-06	5.14805e-05	PF00249	0	0	0	0	0	0	NA	NA	Homeodomain-like superfamily protein	Myb_DNA-binding	Myb_DNA-binding
Gohir.D02G035200.1	NEC	EC	3.40905	6.85062e-05	0.000393041	PF00234	0	0	SignalP-noTM	0	0	0	AT2G38540	LTPL7 - Protease inhibitor/seed storage/LTP family protein precursor, expressed; lipid transfer protein 1	lipid transfer protein 1	Tryp_alpha_amyl, LTP_2	Tryp_alpha_amyl, LTP_2
Gohir.A05G329000.1	NEC	EC	3.40804	1.05446e-11	2.82171e-10	PF01490	KOG1303	0	0	K13946	0	0	AT2G38120	transmembrane amino acid transporter protein, putative, expressed; Transmembrane amino acid transporter family protein	Transmembrane amino acid transporter family protein	Aa_trans	Aa_trans
Gohir.A05G069200.1	NEC	EC	3.40704	2.07172e-29	7.97855e-27	PF00010	0	0	0	0	GO:0046983,GO:0003677	0	AT3G56970	helix-loop-helix DNA-binding domain containing protein, expressed; basic helix-loop-helix (bHLH) DNA-binding superfamily protein	basic helix-loop-helix (bHLH) DNA-binding superfamily protein	HLH, MerR, IL11	HLH, MerR, IL11
Gohir.D01G053200.1	NEC	EC	3.40685	3.55538e-05	0.000219899	PF00407	0	4.2.1.78	SignalP-noTM	0	GO:0006952,GO:0009607	0	NA	NA	0	Bet_v_1	Bet_v_1
Gohir.D11G269700.2	NEC	EC	3.4065	2.60462e-11	6.4507e-10	PF02812,PF00208	KOG2250	1.4.1.3	0	K00261	GO:0055114,GO:0006520,GO:0016491	0	AT5G18170	glutamate dehydrogenase protein, putative, expressed; glutamate dehydrogenase 1	glutamate dehydrogenase 1	ELFV_dehydrog, ELFV_dehydrog_N, 2-Hacid_dh_C, AdoHcyase_NAD, Gp_dh_N, zf-RING_12	ELFV_dehydrog, ELFV_dehydrog_N, 2-Hacid_dh_C, AdoHcyase_NAD, Gp_dh_N, zf-RING_12
Gohir.D11G059900.1	NEC	EC	3.40484	0.03676	0.0868788	0	0	0	SignalP-noTM	0	0	0	AT5G64667	inflorescence deficient in abscission (IDA)-like 2	inflorescence deficient in abscission (IDA)-like 2	#N/A	#N/A
Gohir.A13G032800.1	NEC	EC	3.40427	4.14374e-05	0.000251707	PF00170	0	0	0	0	GO:0006355,GO:0003700	0	AT1G75390	CPuORF1 - conserved peptide uORF-containing transcript, expressed; basic leucine-zipper 44	basic leucine-zipper 44	bZIP_1, bZIP_2, ATG16, bZIP_Maf, DUF1515, APG6_N	bZIP_1, bZIP_2, ATG16, bZIP_Maf, DUF1515, APG6_N
Gohir.A06G090900.1	NEC	EC	3.40357	7.07355e-08	8.3584e-07	PF01277	0	0	0	0	GO:0012511,GO:0016021	0	AT2G25890	oleosin, putative, expressed; Oleosin family protein	Oleosin family protein	Oleosin, DUF3810	Oleosin, DUF3810
Gohir.A13G122600.1	NEC	EC	3.40353	2.38218e-13	8.72345e-12	0	0	0	0	0	0	0	AT1G79160	expressed protein	0	WW, DUF35_N, SR-25	WW, DUF35_N, SR-25
Gohir.A13G133200.1	NEC	EC	3.40327	0.000851495	0.00359731	PF00808	KOG0869	0	0	0	0	0	AT5G47640	histone-like transcription factor and archaeal histone, putative, expressed; nuclear factor Y, subunit B2	nuclear factor Y, subunit B3	CBFD_NFYB_HMF, Histone, CENP-T_C, Bromo_TP	CBFD_NFYB_HMF, Histone, CENP-T_C, Bromo_TP
Gohir.A01G226700.1	NEC	EC	3.40119	2.28041e-07	2.4223e-06	PF11960,PF00487	0	0	0	0	GO:0055114,GO:0016717,GO:0006629	0	AT5G05580	omega-3 fatty acid desaturase, chloroplast precursor, putative, expressed; fatty acid desaturase 8	fatty acid desaturase 8	DUF3474, FA_desaturase	DUF3474, FA_desaturase
Gohir.A07G159400.1	NEC	EC	3.39656	3.49649e-14	1.48654e-12	0	0	0	0	0	0	0	AT5G48500	expressed protein	0	AvrRpt-cleavage	AvrRpt-cleavage
Gohir.D11G255800.1	NEC	EC	3.39611	9.20241e-07	8.45305e-06	PF04770	0	0	0	0	0	0	NA	NA	homeobox protein 31	ZF-HD_dimer, DUF866, WVELL	ZF-HD_dimer, DUF866, WVELL
Gohir.D06G172500.1	NEC	EC	3.39592	1.07746e-06	9.7126e-06	PF03468,PF03469,PF03470	0	0	0	0	GO:0031047	0	AT3G48670	transcription factor X1, putative, expressed; XH/XS domain-containing protein	XH/XS domain-containing protein	XH, XS, zf-XS, Octopine_DH	XH, XS, zf-XS, Octopine_DH
Gohir.A05G252200.1	NEC	EC	3.39537	5.88855e-05	0.00034382	PF00657	0	3.1.1.3	SignalP-noTM	0	GO:0016788	0	AT1G71691	GDSL-like lipase/acylhydrolase, putative, expressed; GDSL-like Lipase/Acylhydrolase superfamily protein	GDSL-like Lipase/Acylhydrolase superfamily protein	Lipase_GDSL	Lipase_GDSL
Gohir.A13G227800.1	NEC	EC	3.39399	4.89482e-06	3.76827e-05	PF00046	0	0	0	0	GO:0003677	0	AT5G59340	homeobox domain containing protein, expressed; WUSCHEL related homeobox 2	WUSCHEL related homeobox 2	Homeodomain	Homeodomain
Gohir.A10G212300.1	NEC	EC	3.39371	4.24266e-09	6.57954e-08	PF08449	KOG1582	0	0	K15277	GO:0055085	0	AT1G12600	transporter family protein, putative, expressed; UDP-N-acetylglucosamine (UAA) transporter family	UDP-N-acetylglucosamine (UAA) transporter family	UAA, EamA, TPT, Wzy_C, DUF373	UAA, EamA, TPT, Wzy_C, DUF373
Gohir.A03G146700.1	NEC	EC	3.39114	2.25887e-16	1.40879e-14	PF03195	0	0	0	0	0	0	AT1G68510	DUF260 domain containing protein, putative, expressed; LOB domain-containing protein 42	LOB domain-containing protein 42	LOB	LOB
Gohir.A07G017400.1	NEC	EC	3.38897	3.4862e-14	1.4849e-12	PF00010	0	0	0	0	GO:0046983	0	NA	NA	LJRHL1-like 3	HLH, DUF5042, CDK2AP	HLH, DUF5042, CDK2AP
Gohir.D13G033900.1	NEC	EC	3.388	0.00100715	0.00417105	0	0	0	0	0	0	0	AT1G22030	expressed protein	0	BPS1, CwfJ_C_2, Sporozoite_P67	BPS1, CwfJ_C_2, Sporozoite_P67
Gohir.A12G155900.1	NEC	EC	3.38795	0.0171123	0.0462256	0	0	0	0	0	0	0	NA	NA	0	#N/A	#N/A
Gohir.D05G266050.1	NEC	EC	3.38749	3.5416e-05	0.000219105	PF05770	0	2.7.1.159	0	0	GO:0047325,GO:0005524,GO:0000287,GO:0032957,GO:0005622,GO:0052726,GO:0052725	0	AT4G08170	Inositol 1, 3, 4-trisphosphate 5/6-kinase, putative, expressed; Inositol 1,3,4-trisphosphate 5/6-kinase family protein	Inositol 1,3,4-trisphosphate 5/6-kinase family protein	Ins134_P3_kin, Ins134_P3_kin_N	Ins134_P3_kin, Ins134_P3_kin_N
Gohir.D11G034300.1	NEC	EC	3.38713	1.54444e-14	7.02508e-13	PF00249	KOG0048	0	0	0	0	0	AT5G62470	MYB family transcription factor, putative, expressed; myb domain protein 96	myb domain protein 96	Myb_DNA-binding, Myb_DNA-bind_6, SLIDE, CARMIL_C	Myb_DNA-binding, Myb_DNA-bind_6, SLIDE, CARMIL_C
Gohir.A11G205800.1	NEC	EC	3.38358	1.40745e-07	1.56093e-06	PF04770	0	0	0	0	0	0	AT4G24660	ZF-HD homeobox protein, putative, expressed; homeobox protein 22	homeobox protein 22	ZF-HD_dimer, DUF5490, YebG	ZF-HD_dimer, DUF5490, YebG
Gohir.D07G035800.1	NEC	EC	3.38104	1.04617e-06	9.46142e-06	PF03106	0	0	0	0	GO:0003700,GO:0006355,GO:0043565	0	AT4G31800	WRKY76, expressed; WRKY DNA-binding protein 18	WRKY DNA-binding protein 18	WRKY, SHE3, HOOK, GED, SAS4, TSCPD	WRKY, SHE3, HOOK, GED, SAS4, TSCPD
Gohir.D13G155100.1	NEC	EC	3.38023	1.61591e-12	5.02203e-11	PF00400	KOG0315	0	0	K14829	GO:0005515	0	NA	NA	Transducin/WD40 repeat-like superfamily protein	WD40, ANAPC4_WD40, PQQ_3, Nucleoporin_N, PQQ, PQQ_2, SUKH-3, Head_binding	WD40, ANAPC4_WD40, PQQ_3, Nucleoporin_N, PQQ, PQQ_2, SUKH-3, Head_binding
Gohir.D09G139100.1	NEC	EC	3.38008	1.78589e-05	0.000118975	PF03016	KOG1021	2.4.2.41	0	0	GO:0016757,GO:0006486	0	AT5G03795	exostosin family protein, putative, expressed; Exostosin family protein	Exostosin family protein	Exostosin, DUF916, Glycos_transf_1, DUF5383	Exostosin, DUF916, Glycos_transf_1, DUF5383
Gohir.A12G127500.1	NEC	EC	3.37949	0.00562571	0.0182076	0	0	0	0	0	0	0	AT1G02700	expressed protein	0	#N/A	#N/A
Gohir.A04G052400.1	NEC	EC	3.3792	1.19959e-06	1.07002e-05	PF08263,PF00069,PF13855	KOG1187	2.7.11.1	SignalP-noTM	0	GO:0006468,GO:0004672,GO:0005515,GO:0005524	0	AT2G23950	receptor-like kinase, putative, expressed; Leucine-rich repeat protein kinase family protein	Leucine-rich repeat protein kinase family protein	Pkinase, Pkinase_Tyr, LRRNT_2, LRR_8, LRR_4, LRR_1, Pkinase_fungal, LRR_9, LRR_6	Pkinase, Pkinase_Tyr, LRRNT_2, LRR_8, LRR_4, LRR_1, Pkinase_fungal, LRR_9, LRR_6
Gohir.D09G168300.1	NEC	EC	3.37799	1.68148e-14	7.61098e-13	PF00650	KOG1470	0	0	0	0	0	AT5G63060	SEC14 cytosolic factor family protein, putative, expressed; Sec14p-like phosphatidylinositol transfer family protein	Sec14p-like phosphatidylinositol transfer family protein	CRAL_TRIO, CRAL_TRIO_2, CRAL_TRIO_N, rve, DUF58	CRAL_TRIO, CRAL_TRIO_2, CRAL_TRIO_N, rve, DUF58
Gohir.D06G212700.1	NEC	EC	3.37723	3.85211e-21	4.9866e-19	PF07714,PF01657	KOG1187	2.7.11.1	SignalP-noTM	0	GO:0006468,GO:0004672	0	AT4G05200	TKL_IRAK_DUF26-lc.12 - DUF26 kinases have homology to DUF26 containing loci, expressed; cysteine-rich RLK (RECEPTOR-like protein kinase) 25	cysteine-rich RLK (RECEPTOR-like protein kinase) 25	Pkinase_Tyr, Pkinase, Stress-antifung, TMEM154, DUF3403, Haspin_kinase, APH, Hum_adeno_E3A, Protocadherin, Pkinase_fungal, WBP-1, DUF3827	Pkinase_Tyr, Pkinase, Stress-antifung, TMEM154, DUF3403, Haspin_kinase, APH, Hum_adeno_E3A
Gohir.D06G183200.1	NEC	EC	3.37698	0.0191	0.050578	0	0	0	0	0	0	0	NA	NA	0	CAMSAP_CKK	CAMSAP_CKK
Gohir.D12G214500.1	NEC	EC	3.37624	0.000411323	0.00190127	PF01373	0	3.2.1.2	0	K01177	GO:0000272,GO:0016161	0	AT4G17090	beta-amylase, putative, expressed; chloroplast beta-amylase	chloroplast beta-amylase	Glyco_hydro_14	Glyco_hydro_14
Gohir.D02G021900.1	NEC	EC	3.37488	1.23715e-05	8.61802e-05	0	0	0	0	0	GO:0010155,GO:0005783,GO:0005886	0	NA	NA	Core-2/I-branching beta-1,6-N-acetylglucosaminyltransferase family protein	EIF_2_alpha, CENP-F_leu_zip, TPD52, RecX, Spore_II_R, FlaC_arch, DUF4618	EIF_2_alpha, CENP-F_leu_zip, TPD52, RecX, Spore_II_R, FlaC_arch, DUF4618
Gohir.A09G081400.2	NEC	EC	3.37331	6.34401e-08	7.5699e-07	PF00013,PF10469	0	0	0	0	GO:0003723	0	AT3G16230	KH domain containing protein, putative, expressed; Predicted eukaryotic LigT	Predicted eukaryotic LigT	AKAP7_NLS, KH_1	AKAP7_NLS, KH_1
Gohir.D07G195300.1	NEC	EC	3.37118	2.07745e-18	1.76816e-16	PF07172	0	0	SignalP-noTM	0	0	0	NA	NA	Glycine-rich protein family	GRP, Sar8_2	GRP, Sar8_2
Gohir.D11G112050.1	NEC	EC	3.37084	4.50479e-10	8.65685e-09	PF15699	0	0	0	0	GO:0010112	0	NA	NA	NA	NPR1_interact, TRF, EMC3_TMCO1	NPR1_interact, TRF, EMC3_TMCO1
Gohir.D13G206700.1	NEC	EC	3.36834	2.06031e-14	9.2263e-13	PF03006	KOG0748	0	0	0	GO:0016021	0	AT5G20270	haemolysin-III, putative, expressed; heptahelical transmembrane protein1	heptahelical transmembrane protein1	HlyIII, Oxidored_q3	HlyIII, Oxidored_q3
Gohir.A01G126200.1	NEC	EC	3.36776	6.29933e-06	4.74599e-05	PF02458	0	0	0	0	GO:0016747	0	AT3G23840	transferase family protein, putative, expressed; HXXXD-type acyl-transferase family protein	HXXXD-type acyl-transferase family protein	Transferase	Transferase
Gohir.A10G083300.1	NEC	EC	3.36765	7.62074e-05	0.000432766	0	0	0	0	0	0	0	AT3G18800	expressed protein	0	#N/A	#N/A
Gohir.D13G148000.1	NEC	EC	3.36689	1.25552e-05	8.73177e-05	PF06764	0	0	0	0	0	0	AT4G27350	uncharacterized secreted protein, putative, expressed; Protein of unknown function (DUF1223)	Protein of unknown function (DUF1223)	DUF1223, Omp28, T4_gp9_10	DUF1223, Omp28, T4_gp9_10
Gohir.A13G145600.2	NEC	EC	3.36608	1.71824e-07	1.87163e-06	PF00319	0	0	0	0	GO:0046983,GO:0003677	0	NA	NA	AGAMOUS-like 80	SRF-TF, RPM2, HP0268, BLACT_WH	SRF-TF, RPM2, HP0268, BLACT_WH
Gohir.D06G030950.1	NEC	EC	3.3649	0.0466825	0.105449	0	0	0	0	0	0	0	NA	NA	0	#N/A	#N/A
Gohir.A13G201100.1	NEC	EC	3.36224	1.37913e-08	1.91339e-07	PF03006	KOG0748	0	0	0	GO:0016021	0	AT5G20270	haemolysin-III, putative, expressed; heptahelical transmembrane protein1	heptahelical transmembrane protein1	HlyIII, PPIP5K2_N, Oxidored_q3	HlyIII, PPIP5K2_N, Oxidored_q3
Gohir.D04G076700.1	NEC	EC	3.36221	2.32764e-08	3.07605e-07	0	0	0	0	0	0	0	NA	NA	0	#N/A	#N/A
Gohir.D13G062100.1	NEC	EC	3.36218	1.8268e-07	1.98271e-06	PF00120,PF03951	KOG0683	6.3.1.2	0	K01915	GO:0006542,GO:0006807,GO:0004356	0	AT5G37600	glutamine synthetase, catalytic domain containing protein, expressed; glutamine synthase clone R1	glutamine synthase clone R1	Gln-synt_C, Gln-synt_N	Gln-synt_C, Gln-synt_N
Gohir.D06G152900.1	NEC	EC	3.35967	1.46203e-11	3.81084e-10	PF00067	KOG0156	0	0	K00517	GO:0055114,GO:0020037,GO:0016705,GO:0005506	0	AT1G11600	cytochrome P450, putative, expressed; cytochrome P450, family 77, subfamily B, polypeptide 1	cytochrome P450, family 77, subfamily B, polypeptide 1	p450	p450
Gohir.A04G077700.1	NEC	EC	3.35926	1.75563e-09	2.95035e-08	PF13639	0	6.3.2.19	0	0	0	0	AT5G02750	zinc finger, C3HC4 type domain containing protein, expressed; RING/U-box superfamily protein	RING/U-box superfamily protein	zf-RING_2, zf-RING_11, zf-C3HC4_2, zf-rbx1, zf-C3HC4, zf-RING_5, zf-C3HC4_3, zf-RING_UBOX, zf-ANAPC11, Prok-RING_4, Zn_ribbon_17	zf-RING_2, zf-RING_11, zf-C3HC4_2, zf-rbx1, zf-C3HC4, zf-RING_5, zf-C3HC4_3, zf-RING_UBOX,
Gohir.A10G118720.1	NEC	EC	3.35899	1.10006e-08	1.55516e-07	0	0	0	0	0	GO:0006979,GO:0009507	0	AT5G43750	expressed protein; NAD(P)H dehydrogenase 18	NAD(P)H dehydrogenase 18	#N/A	#N/A
Gohir.A13G086535.1	NEC	EC	3.35819	0.0304936	0.0743264	PF02544	0	1.3.1.94	0	0	GO:0016627,GO:0005737,GO:0006629,GO:0016021	0	AT2G16530	3-oxo-5-alpha-steroid 4-dehydrogenase, putative, expressed; 3-oxo-5-alpha-steroid 4-dehydrogenase family protein	3-oxo-5-alpha-steroid 4-dehydrogenase family protein	Steroid_dh, PEMT	Steroid_dh, PEMT
Gohir.A08G248300.1	NEC	EC	3.35785	0.0133726	0.037612	0	0	0	0	0	0	0	NA	NA	0	DUF2457	DUF2457
Gohir.D11G018400.1	NEC	EC	3.35744	1.52186e-05	0.000103398	PF00561	KOG1454	3.7.1.9	0	0	0	0	AT1G64670	hydrolase, alpha/beta fold family domain containing protein, expressed; alpha/beta-Hydrolases superfamily protein	alpha/beta-Hydrolases superfamily protein	Abhydrolase_1, Abhydrolase_6, Hydrolase_4, Ser_hydrolase, LIDHydrolase, Esterase	Abhydrolase_1, Abhydrolase_6, Hydrolase_4, Ser_hydrolase, LIDHydrolase, Esterase
Gohir.A09G137600.1	NEC	EC	3.35742	1.4666e-10	3.13784e-09	PF08879,PF08880	0	0	0	0	GO:0005634,GO:0032502,GO:0005524,GO:0006355,GO:0006351	0	AT2G36400	growth-regulating factor, putative, expressed; growth-regulating factor 3	growth-regulating factor 4	WRC, QLQ	WRC, QLQ
Gohir.D05G291601.1	NEC	EC	3.35711	8.05525e-08	9.41967e-07	0	0	0	0	0	0	0	AT5G04500	exostosin, putative, expressed; glycosyltransferase family protein 47	glycosyltransferase family protein 47	Glyco_hydro_43, LCE	Glyco_hydro_43, LCE
Gohir.A06G034600.1	NEC	EC	3.35703	4.31286e-06	3.36226e-05	PF13516	0	0	0	0	GO:0005515	0	AT4G08980	OsFBX192 - F-box domain containing protein, expressed; F-BOX WITH WD-40 2	F-BOX WITH WD-40 2	LRR_6, F-box-like, LRR_8, LRR_4, F-box, LRR_1	LRR_6, F-box-like, LRR_8, LRR_4, F-box, LRR_1
Gohir.A12G021450.1	NEC	EC	3.3559	0.127797	0.234812	0	0	0	0	0	0	0	NA	NA	0	#N/A	#N/A
Gohir.A10G088200.1	NEC	EC	3.35532	9.40543e-09	1.34932e-07	PF00847	0	0	0	K09285	GO:0003700,GO:0006355,GO:0007275	0	AT5G10510	AP2/EREBP transcription factor BABY BOOM, putative, expressed; AINTEGUMENTA-like 6	AINTEGUMENTA-like 6	AP2	AP2
Gohir.A06G146601.1	NEC	EC	3.35486	1.06184e-05	7.5229e-05	PF01263	0	3.1.3.16	SignalP-noTM	0	GO:0005975,GO:0016853	0	NA	NA	NA	Aldose_epim, Sigma70_ECF	Aldose_epim, Sigma70_ECF
Gohir.A05G157400.1	NEC	EC	3.3546	3.30679e-06	2.65175e-05	PF00657	0	3.1.1.3	SignalP-noTM	0	GO:0016788	0	AT5G45960	GDSL-like lipase/acylhydrolase, putative, expressed; GDSL-like Lipase/Acylhydrolase superfamily protein	GDSL-like Lipase/Acylhydrolase superfamily protein	Lipase_GDSL	Lipase_GDSL
Gohir.D11G284300.1	NEC	EC	3.35453	2.6557e-05	0.000169284	PF13415,PF13418	0	0	0	0	0	0	NA	NA	Galactose oxidase/kelch repeat superfamily protein	Kelch_4, Kelch_3, Kelch_6, Kelch_1, Kelch_5, Kelch_2	Kelch_4, Kelch_3, Kelch_6, Kelch_1, Kelch_5, Kelch_2
Gohir.A03G100700.1	NEC	EC	3.35266	2.69085e-06	2.2143e-05	PF02365	0	0	0	0	GO:0003677,GO:0006355	0	AT1G26870	no apical meristem protein, putative, expressed; NAC (No Apical Meristem) domain transcriptional regulator superfamily protein	NAC (No Apical Meristem) domain transcriptional regulator superfamily protein	NAM	NAM
Gohir.A11G067000.1	NEC	EC	3.34827	6.84167e-08	8.11344e-07	0	0	0	0	0	0	0	AT3G01516	expressed protein	0	#N/A	#N/A
Gohir.D05G192600.1	NEC	EC	3.34707	0.00569895	0.0183839	PF00847	0	0	0	0	GO:0003700,GO:0006355	0	AT1G75490	AP2 domain containing protein, expressed; Integrase-type DNA-binding superfamily protein	Integrase-type DNA-binding superfamily protein	AP2	AP2
Gohir.A06G110800.1	NEC	EC	3.34698	0.000118108	0.000635939	PF13472	KOG3035	0	0	0	0	0	AT5G45920	GDSL-like lipase/acylhydrolase, putative, expressed; SGNH hydrolase-type esterase superfamily protein	SGNH hydrolase-type esterase superfamily protein	Lipase_GDSL_2, Lipase_GDSL	Lipase_GDSL_2, Lipase_GDSL
Gohir.A02G109703.1	NEC	EC	3.34607	2.30073e-05	0.00014902	PF01061	0	0	0	0	GO:0016020	0	AT1G15520	pleiotropic drug resistance protein, putative, expressed; pleiotropic drug resistance 12	pleiotropic drug resistance 12	ABC2_membrane, ABC2_membrane_3	ABC2_membrane, ABC2_membrane_3
Gohir.D04G174942.1	NEC	EC	3.34543	0.00592646	0.0190066	0	0	0	0	0	0	0	NA	NA	NA	B3, V4R	B3, V4R
Gohir.A01G154800.1	NEC	EC	3.34501	0.000109605	0.000596617	PF14368	0	0	SignalP-noTM	0	0	0	AT1G27950	LTPL80 - Protease inhibitor/seed storage/LTP family protein precursor, expressed; glycosylphosphatidylinositol-anchored lipid protein transfer 1	glycosylphosphatidylinositol-anchored lipid protein transfer 1	LTP_2, Tryp_alpha_amyl	LTP_2, Tryp_alpha_amyl
Gohir.D08G018300.1	NEC	EC	3.34401	9.28504e-28	3.02182e-25	PF03195	0	0	0	0	0	0	AT2G28500	DUF260 domain containing protein, putative, expressed; LOB domain-containing protein 11	LOB domain-containing protein 11	LOB, CENP-H, Ribosomal_L29, DivIC, Bap31_Bap29_C, FlxA	LOB, CENP-H, Ribosomal_L29, DivIC, Bap31_Bap29_C, FlxA
Gohir.A13G005600.1	NEC	EC	3.34342	2.49617e-08	3.27815e-07	PF03195	0	0	0	0	0	0	AT2G40470	DUF260 domain containing protein, putative, expressed; LOB domain-containing protein 15	LOB domain-containing protein 15	LOB, LPP, DivIC	LOB, LPP, DivIC
Gohir.D05G052300.1	NEC	EC	3.34308	3.01258e-10	6.01397e-09	PF12146	KOG1552	3.1.1.23	0	0	0	0	AT4G31020	OsPOP6 - Putative Prolyl Oligopeptidase homologue, expressed; alpha/beta-Hydrolases superfamily protein	alpha/beta-Hydrolases superfamily protein	Hydrolase_4, Abhydrolase_1, Abhydrolase_6, Peptidase_S9, Abhydrolase_2, BAAT_C, FSH1, DUF818, Abhydrolase_5, Peptidase_S15, Abhydrolase_3, DLH	Hydrolase_4, Abhydrolase_1, Abhydrolase_6, Peptidase_S9, Abhydrolase_2, BAAT_C, FSH1, DUF8
Gohir.D13G035000.1	NEC	EC	3.34252	1.3669e-16	8.83495e-15	PF02362	0	0	0	0	GO:0003677	0	NA	NA	AP2/B3-like transcriptional factor family protein	B3	B3
Gohir.A07G203600.2	NEC	EC	3.34102	0.000580372	0.00257451	0	0	0	0	0	0	0	NA	NA	0	#N/A	#N/A
Gohir.D09G154800.1	NEC	EC	3.34039	0.00353479	0.0123112	PF09713	0	3.4.17.23	0	0	0	0	AT5G02580	plant-specific domain TIGR01589 family protein, expressed; Plant protein 1589 of unknown function	Plant protein 1589 of unknown function	A_thal_3526	A_thal_3526
Gohir.A11G042500.1	NEC	EC	3.34027	8.33668e-08	9.71436e-07	PF04782,PF04783	0	0	0	0	0	0	AT3G51290	DUF630/DUF632 domains containing protein, putative, expressed; Protein of unknown function (DUF630) ;Protein of unknown function (DUF632)	Protein of unknown function (DUF630) ;Protein of unknown function (DUF632)	DUF632, DUF630, FTA4	DUF632, DUF630, FTA4
Gohir.A03G000048.1	NEC	EC	3.34018	3.10546e-06	2.50971e-05	PF00664,PF00005	KOG0055	3.6.3.44	0	K05658	GO:0005524,GO:0006810,GO:0055085,GO:0016887,GO:0016021,GO:0042626	0	AT4G25960	multidrug resistance protein, putative, expressed; P-glycoprotein 2	P-glycoprotein 2	ABC_membrane, ABC_tran, SMC_N, ABC_ATPase, AAA_16, AAA_29, AAA_22, Zeta_toxin, AAA_15, RsgA_GTPase, AAA_30, DUF87, AAA_21, AAA_5, SbcCD_C, G-alpha, AAA, AAA_7, AAA_23, AAA_24, APS_kinase, TrkA_N, PRK, DUF815, AAA_19, Pox_A32, MMR_HSR1, Ploopntkinase3, Gtr1_RagA, AAA_17, AAA_33, Dynamin_N, AAA_25	ABC_membrane, ABC_tran, SMC_N, ABC_ATPase, AAA_16, AAA_29, AAA_22, Zeta_toxin, AAA_15, Rsg
Gohir.A03G002500.1	NEC	EC	3.33925	8.56174e-10	1.55593e-08	PF00072,PF00249	0	0	0	0	GO:0000160	0	AT4G18020	two-component response regulator, putative, expressed; CheY-like two-component responsive regulator family protein	CheY-like two-component responsive regulator family protein	Myb_DNA-binding, Response_reg	Myb_DNA-binding, Response_reg
Gohir.A05G214400.1	NEC	EC	3.33905	0.000168326	0.000866649	PF01490	KOG1303	0	0	0	0	0	AT5G49630	amino acid transporter, putative, expressed; amino acid permease 6	amino acid permease 6	Aa_trans	Aa_trans
Gohir.D07G064400.1	NEC	EC	3.33817	5.50727e-13	1.87556e-11	PF00564	0	0	0	0	GO:0005515	0	NA	NA	Octicosapeptide/Phox/Bem1p family protein	PB1	PB1
Gohir.D11G289233.1	NEC	EC	3.3378	0.112349	0.212312	0	0	0	0	0	0	0	NA	NA	NA	mRNA_decap_C	mRNA_decap_C
Gohir.D05G217700.1	NEC	EC	3.33727	2.15074e-09	3.54726e-08	PF01490	KOG1303	0	0	0	0	0	AT5G49630	amino acid transporter, putative, expressed; amino acid permease 6	amino acid permease 6	Aa_trans	Aa_trans
Gohir.A09G173900.1	NEC	EC	3.33708	9.89709e-23	1.6277e-20	PF03098	KOG2408	0	0	0	0	0	AT1G73680	alpha-DOX2, putative, expressed; alpha dioxygenase	alpha dioxygenase	An_peroxidase	An_peroxidase
Gohir.A13G193300.1	NEC	EC	3.33571	8.47458e-08	9.86261e-07	PF14364,PF05553	0	0	0	0	0	0	NA	NA	0	DUF761, DUF4408, hNIFK_binding	DUF761, DUF4408, hNIFK_binding
Gohir.D03G069900.1	NEC	EC	3.33495	1.02115e-07	1.16494e-06	PF03083	KOG1623	0	0	K15382	GO:0051119,GO:0016021	0	AT1G21460	nodulin MtN3 family protein, putative, expressed; Nodulin MtN3 family protein	Nodulin MtN3 family protein	MtN3_slv, Herpes_LMP1	MtN3_slv, Herpes_LMP1
Gohir.D07G166500.1	NEC	EC	3.33338	3.59654e-05	0.000222207	PF04526	0	0	SignalP-noTM	0	0	0	AT3G07390	AIR12, putative, expressed; auxin-responsive family protein	auxin-responsive family protein	DUF568	DUF568
Gohir.D13G010300.1	NEC	EC	3.33255	2.39784e-05	0.000154509	0	0	0	0	0	0	0	NA	NA	0	#N/A	#N/A
Gohir.D12G034900.1	NEC	EC	3.32929	0.0104764	0.030738	0	0	0	0	0	0	0	NA	NA	0	#N/A	#N/A
Gohir.A11G304700.1	NEC	EC	3.32758	0.0137648	0.0385602	PF03195	0	0	0	0	0	0	AT1G65620	DUF260 domain containing protein, putative, expressed; Lateral organ boundaries (LOB) domain family protein	Lateral organ boundaries (LOB) domain family protein	LOB	LOB
Gohir.D12G162950.1	NEC	EC	3.32709	0.0486863	0.109165	0	0	0	0	0	0	0	NA	NA	NA	#N/A	#N/A
Gohir.D08G101000.1	NEC	EC	3.32694	5.18604e-09	7.88121e-08	PF03662	0	3.2.1.31	SignalP-noTM	K07964	GO:0016020,GO:0016798	0	AT5G34940	heparanase-like protein precursor, putative, expressed; glucuronidase 3	glucuronidase 3	Glyco_hydro_79n	Glyco_hydro_79n
Gohir.A13G181850.1	NEC	EC	3.32588	1.98316e-05	0.000130444	PF04654	0	0	0	0	0	0	AT4G31330	expressed protein; Protein of unknown function, DUF599	Protein of unknown function, DUF599	DUF599, DUF1746	DUF599, DUF1746
Gohir.A05G371900.1	NEC	EC	3.32515	5.56966e-05	0.000327226	0	0	0	0	0	0	0	NA	NA	0	Tom22	Tom22
Gohir.D04G014150.1	NEC	EC	3.32508	1.36124e-06	1.19871e-05	PF00651	KOG1987	0	0	K10523	GO:0005515	0	AT3G56230	BTB9 - Bric-a-Brac, Tramtrack, Broad Complex BTB domain, expressed; BTB/POZ domain-containing protein	BTB/POZ domain-containing protein	BTB, BACK, DUF3570, VGCC_alpha2	BTB, BACK, DUF3570, VGCC_alpha2
Gohir.A04G066600.1	NEC	EC	3.32484	7.21872e-07	6.79165e-06	PF03479	0	0	0	0	0	0	AT4G12080	AT hook motif domain containing protein, expressed; AT-hook motif nuclear-localized protein 1	AT-hook motif nuclear-localized protein 1	DUF296, AT_hook, K_channel_TID, Putative_PNPOx	DUF296, AT_hook, K_channel_TID, Putative_PNPOx
Gohir.A11G195400.1	NEC	EC	3.32448	2.39973e-06	2.00002e-05	PF13417,PF00043	KOG0406	2.5.1.18	0	K00799	GO:0005515	0	AT1G10370	glutathione S-transferase, putative, expressed; Glutathione S-transferase family protein	Glutathione S-transferase family protein	GST_N_3, GST_N, GST_N_2, GST_C, GST_C_2, GST_N_4	GST_N_3, GST_N, GST_N_2, GST_C, GST_C_2, GST_N_4
Gohir.D10G189500.1	NEC	EC	3.32155	9.41884e-08	1.08522e-06	PF00191	KOG0819	0	0	K17099	GO:0005544,GO:0005509	0	AT5G12380	annexin, putative, expressed; annexin 8	annexin 8	Annexin, SpoOE-like	Annexin, SpoOE-like
Gohir.D12G160100.1	NEC	EC	3.32114	2.29638e-08	3.03821e-07	PF00071	KOG1673	0	0	K07976	GO:0003924,GO:0005525	0	AT3G21700	ras-related protein, putative, expressed; Ras-related small GTP-binding family protein	Ras-related small GTP-binding family protein	Ras, Roc, DLIC	Ras, Roc, DLIC
Gohir.D07G002800.1	NEC	EC	3.31832	3.39235e-06	2.70954e-05	PF00027,PF11834,PF00520,PF12796	KOG0498	0	0	0	GO:0005216,GO:0055085,GO:0016020,GO:0006811	0	AT2G26650	potassium channel AKT1, putative, expressed; K+ transporter 1	K+ transporter 1	Ion_trans, Ank_2, KHA, Ank_5, Ank, Ank_4, Ank_3, cNMP_binding, Ion_trans_2	Ion_trans, Ank_2, KHA, Ank_5, Ank, Ank_4, Ank_3, cNMP_binding, Ion_trans_2
Gohir.A12G100400.3	NEC	EC	3.3171	3.91879e-09	6.11628e-08	PF00319,PF01486	KOG0014	0	0	0	GO:0005634,GO:0006355,GO:0046983,GO:0003700,GO:0003677	0	AT5G13790	OsMADS27 - MADS-box family gene with MIKCc type-box, expressed; AGAMOUS-like 15	AGAMOUS-like 15	SRF-TF, K-box	SRF-TF, K-box
Gohir.D12G116400.1	NEC	EC	3.31592	9.09269e-09	1.31111e-07	PF00847	0	0	0	0	GO:0006355,GO:0003700	0	AT1G01250	AP2 domain containing protein, expressed; Integrase-type DNA-binding superfamily protein	Integrase-type DNA-binding superfamily protein	AP2, MtrH	AP2, MtrH
Gohir.A09G068300.1	NEC	EC	3.31448	0.0328613	0.0791747	0	0	1.6.5.3	0	0	0	0	ATMG00665	NADPH-dependent oxidoreductase, putative, expressed; NADH dehydrogenase 5B	NADH dehydrogenase subunit 5C	#N/A	#N/A
Gohir.A04G081100.1	NEC	EC	3.31385	2.58353e-19	2.55665e-17	PF00106	KOG1208	1.1.1.330	0	0	0	0	AT5G02540	oxidoreductase, short chain dehydrogenase/reductase family domain containing family, expressed; NAD(P)-binding Rossmann-fold superfamily protein	NAD(P)-binding Rossmann-fold superfamily protein	adh_short, adh_short_C2, KR, Epimerase, CheD	adh_short, adh_short_C2, KR, Epimerase, CheD
Gohir.A04G147300.2	NEC	EC	3.31366	9.94612e-10	1.77334e-08	PF00337,PF01762	KOG3587	2.4.1.146	0	0	GO:0016020,GO:0030246,GO:0006486,GO:0008378	0	AT1G26810	galactosyltransferase family protein, putative, expressed; galactosyltransferase1	galactosyltransferase1	Gal-bind_lectin, Galactosyl_T	Gal-bind_lectin, Galactosyl_T
Gohir.A05G240700.7	NEC	EC	3.31315	3.10396e-08	3.98463e-07	PF01842	0	2.7.7.59	0	0	0	0	AT1G76990	ACT domain containing protein, putative, expressed; ACT domain repeat 3	ACT domain repeat 3	ACT, ACT_4, ACT_6, ACT_7, GFRP	ACT, ACT_4, ACT_6, ACT_7, GFRP
Gohir.D05G338300.1	NEC	EC	3.31003	2.47866e-07	2.60516e-06	PF00982,PF02358	KOG1050	2.4.1.15	0	0	GO:0003824,GO:0005992	K16055	AT1G78580	trehalose-6-phosphate synthase, putative, expressed; trehalose-6-phosphate synthase	trehalose-6-phosphate synthase	Glyco_transf_20, Trehalose_PPase, BRX_N	Glyco_transf_20, Trehalose_PPase, BRX_N
Gohir.D07G238200.1	NEC	EC	3.30968	1.73305e-05	0.00011588	PF03097	0	0	0	0	0	0	AT5G14020	expressed protein; Endosomal targeting BRO1-like domain-containing protein	Endosomal targeting BRO1-like domain-containing protein	BRO1	BRO1
Gohir.D10G129201.1	NEC	EC	3.30946	4.22232e-10	8.17813e-09	PF00069	KOG1187	2.7.11.1	0	0	GO:0006468,GO:0004672,GO:0005524	0	AT3G59420	TKL_IRAK_CR4L.1 - The CR4L subfamily has homology with Crinkly4, expressed; crinkly4	crinkly4	Pkinase, Pkinase_Tyr, APH, ABC1	Pkinase, Pkinase_Tyr, APH, ABC1
Gohir.A06G113100.1	NEC	EC	3.30895	0.00222372	0.00827832	0	0	0	0	0	0	0	NA	NA	0	#N/A	#N/A
Gohir.A10G137500.1	NEC	EC	3.30749	2.36721e-12	7.1721e-11	PF13540,PF00069	KOG1187	2.7.11.1	0	0	GO:0006468,GO:0004672,GO:0005524	0	AT3G59420	TKL_IRAK_CR4L.1 - The CR4L subfamily has homology with Crinkly4, expressed; crinkly4	crinkly4	Pkinase, Pkinase_Tyr, RCC1_2, TNFR_c6, APH, RCC1, ABC1	Pkinase, Pkinase_Tyr, RCC1_2, TNFR_c6, APH, RCC1, ABC1
Gohir.A11G058601.1	NEC	EC	3.30582	1.12121e-13	4.34696e-12	PF00079	0	0	0	0	GO:0005615	0	AT2G25240	serpin domain containing protein, putative, expressed; Serine protease inhibitor (SERPIN) family protein	Serine protease inhibitor (SERPIN) family protein	Serpin	Serpin
Gohir.A13G066151.1	NEC	EC	3.30274	4.14823e-05	0.000251918	PF14368	0	0	SignalP-noTM	0	0	0	AT5G64080	LTPL69 - Protease inhibitor/seed storage/LTP family protein precursor, expressed; Bifunctional inhibitor/lipid-transfer protein/seed storage 2S albumin superfamily protein	Bifunctional inhibitor/lipid-transfer protein/seed storage 2S albumin superfamily protein	LTP_2, Tryp_alpha_amyl, Hydrophob_seed, CD52	LTP_2, Tryp_alpha_amyl, Hydrophob_seed, CD52
Gohir.A12G218600.1	NEC	EC	3.30261	0.000167199	0.000862012	PF08244,PF00251,PF11837	KOG0228	3.2.1.26	0	K01193	GO:0004575,GO:0004564	0	AT1G12240	glycosyl hydrolases, putative, expressed; Glycosyl hydrolases family 32 protein	Glycosyl hydrolases family 32 protein	Glyco_hydro_32N, Glyco_hydro_32C, DUF3357	Glyco_hydro_32N, Glyco_hydro_32C, DUF3357
Gohir.D06G029500.1	NEC	EC	3.30183	0.031888	0.0771757	0	0	0	0	0	0	0	NA	NA	0	#N/A	#N/A
Gohir.D01G038500.1	NEC	EC	3.30164	2.92618e-15	1.48932e-13	PF00924	KOG4629	0	0	0	GO:0055085,GO:0016020	0	AT1G78610	uncharacterized mscS family protein, putative, expressed; mechanosensitive channel of small conductance-like 6	mechanosensitive channel of small conductance-like 6	MS_channel, CPP1-like	MS_channel, CPP1-like
Gohir.D07G138900.1	NEC	EC	3.29795	1.47632e-07	1.62871e-06	PF08541,PF08392	0	2.3.1.199	0	0	GO:0016020,GO:0006633,GO:0016747	K15397	AT1G01120	3-ketoacyl-CoA synthase, putative, expressed; 3-ketoacyl-CoA synthase 1	3-ketoacyl-CoA synthase 1	FAE1_CUT1_RppA, ACP_syn_III_C, Chal_sti_synt_C, Chal_sti_synt_N, ACP_syn_III	FAE1_CUT1_RppA, ACP_syn_III_C, Chal_sti_synt_C, Chal_sti_synt_N, ACP_syn_III
Gohir.D08G021050.1	NEC	EC	3.29691	1.24349e-11	3.28193e-10	0	0	0	0	0	0	0	NA	NA	0	PspA_IM30, DUF5082, Spc7, Spectrin, DUF5344, Csm1_N, DASH_Spc34, DUF4140, HAUS-augmin3, ATG16, FapA, DivIC, Myc-LZ	PspA_IM30, DUF5082, Spc7, Spectrin, DUF5344, Csm1_N, DASH_Spc34, DUF4140, HAUS-augmin3, AT
Gohir.D01G184800.1	NEC	EC	3.29628	8.65903e-10	1.57175e-08	PF14144,PF00170	0	0	0	K14431	GO:0043565,GO:0003700,GO:0006355,GO:0006351	0	AT5G06839	transcription factor, putative, expressed; bZIP transcription factor family protein	bZIP transcription factor family protein	DOG1, bZIP_1, bZIP_2, DUF2890, bZIP_Maf	DOG1, bZIP_1, bZIP_2, DUF2890, bZIP_Maf
Gohir.A09G160900.1	NEC	EC	3.29546	8.45141e-37	6.85216e-34	0	0	0	0	0	0	0	AT5G02020	expressed protein	0	Nucleoporin_FG	Nucleoporin_FG
Gohir.D10G099700.1	NEC	EC	3.29537	2.49077e-08	3.27198e-07	PF00847	0	0	0	K09285	GO:0006355,GO:0003700,GO:0007275	0	AT5G10510	AP2/EREBP transcription factor BABY BOOM, putative, expressed; AINTEGUMENTA-like 6	AINTEGUMENTA-like 6	AP2	AP2
Gohir.A08G181600.3	NEC	EC	3.29534	1.40573e-06	1.23342e-05	PF00168,PF08372	KOG1028	0	0	0	0	0	AT4G11610	anthranilate phosphoribosyltransferase, putative, expressed; C2 calcium/lipid-binding plant phosphoribosyltransferase family protein	C2 calcium/lipid-binding plant phosphoribosyltransferase family protein	C2, PRT_C, Pex24p, Reticulon, SelP_N	C2, PRT_C, Pex24p, Reticulon, SelP_N
Gohir.D05G237200.1	NEC	EC	3.29407	2.53977e-06	2.10271e-05	PF00501	KOG1180	6.2.1.3	0	0	GO:0008152,GO:0003824	0	AT1G77590	acyl-CoA synthetase protein, putative, expressed; long chain acyl-CoA synthetase 9	long chain acyl-CoA synthetase 9	AMP-binding, AMP-binding_C	AMP-binding, AMP-binding_C
Gohir.A02G172200.1	NEC	EC	3.29354	4.30417e-08	5.33458e-07	PF04783,PF04782	0	0	0	0	0	0	AT3G51290	DUF630/DUF632 domains containing protein, putative, expressed; Protein of unknown function (DUF630) ;Protein of unknown function (DUF632)	Protein of unknown function (DUF630) ;Protein of unknown function (DUF632)	DUF632, DUF630, ChuX_HutX, NGF, Saw1	DUF632, DUF630, ChuX_HutX, NGF, Saw1
Gohir.A12G112900.1	NEC	EC	3.29327	8.98892e-08	1.03983e-06	PF00847	0	0	0	0	GO:0003700,GO:0006355	0	AT1G01250	AP2 domain containing protein, expressed; Integrase-type DNA-binding superfamily protein	Integrase-type DNA-binding superfamily protein	AP2	AP2
Gohir.A05G289700.1	NEC	EC	3.29271	1.74969e-06	1.50494e-05	PF03547	KOG2722	0	0	0	GO:0016021,GO:0055085	0	AT1G20925	auxin efflux carrier component, putative, expressed; Auxin efflux carrier family protein	Auxin efflux carrier family protein	Mem_trans, NapE	Mem_trans, NapE
Gohir.D09G123900.1	NEC	EC	3.29255	0.000516804	0.00232738	PF03760	0	0	0	0	GO:0009793	0	NA	NA	Late Embryogenesis Abundant 4-5	LEA_1	LEA_1
Gohir.D13G099000.1	NEC	EC	3.29072	1.41968e-05	9.7271e-05	PF04145	KOG3386	0	0	K14686	GO:0005375,GO:0016021,GO:0035434	0	NA	NA	copper transporter 1	Ctr	Ctr
Gohir.D10G014600.1	NEC	EC	3.28941	6.42283e-05	0.00037117	PF01852,PF00046	KOG0484	0	0	0	GO:0008289,GO:0003677	0	AT4G04890	homeobox and START domains containing protein, putative, expressed; protodermal factor 2	protodermal factor 2	START, Homeodomain, Homeobox_KN, MRP-L20, zf-Mss51, YabA, HTH_47, NRBF2, NAM-associated, CDC45, DivIC	START, Homeodomain, Homeobox_KN, MRP-L20, zf-Mss51, YabA, HTH_47, NRBF2, NAM-associated, C
Gohir.A05G334900.1	NEC	EC	3.28835	1.0145e-07	1.15821e-06	PF06203,PF00643	0	0	0	0	GO:0008270,GO:0005622,GO:0005515	0	NA	NA	B-box type zinc finger protein with CCT domain	CCT, zf-B_box	CCT, zf-B_box
Gohir.A05G157600.1	NEC	EC	3.28705	5.53319e-10	1.04552e-08	PF00847	0	0	0	0	GO:0003700,GO:0006355	0	AT3G23240	AP2 domain containing protein, expressed; ethylene response factor 1	ethylene responsive element binding factor 2	AP2	AP2
Gohir.A01G111400.1	NEC	EC	3.287	6.87409e-21	8.55577e-19	0	0	0	0	0	0	0	AT1G75710	ZOS4-01 - C2H2 zinc finger protein, expressed; C2H2-like zinc finger protein	C2H2-like zinc finger protein	zf-C2H2	zf-C2H2
Gohir.D04G096532.1	NEC	EC	3.28623	0.0226011	0.0580755	PF00146	0	1.6.5.3	0	K03878	GO:0055114,GO:0016020	0	ATMG01120	NADPH-dependent oxidoreductase, putative, expressed; NADH dehydrogenase 1B	NA	NADHdh	NADHdh
Gohir.A05G351200.1	NEC	EC	3.28615	3.97791e-14	1.67576e-12	PF13417,PF13410	KOG1422	1.8.5.1	0	0	GO:0005515	0	AT1G75270	glutathione S-transferase, N-terminal domain containing protein, expressed; dehydroascorbate reductase 2	dehydroascorbate reductase 2	GST_N_3, GST_N_2, GST_C_2, GST_N, GST_C, Glutaredoxin, GST_C_3, GST_N_4, Tom37	GST_N_3, GST_N_2, GST_C_2, GST_N, GST_C, Glutaredoxin, GST_C_3, GST_N_4, Tom37
Gohir.A11G153200.1	NEC	EC	3.28237	1.20728e-07	1.35882e-06	PF00860	KOG1292	0	0	K14611	GO:0006810,GO:0055085,GO:0005215,GO:0016020	0	AT2G05760	nucleobase-ascorbate transporter, putative, expressed; Xanthine/uracil permease family protein	Xanthine/uracil permease family protein	Xan_ur_permease	Xan_ur_permease
Gohir.D06G211600.2	NEC	EC	3.28228	4.90059e-05	0.00029234	PF05212	0	0	0	0	0	0	AT1G61240	lysine ketoglutarate reductase trans-splicing related 1, putative, expressed; Protein of unknown function (DUF707)	Protein of unknown function (DUF707)	DUF707	DUF707
Gohir.A02G033700.1	NEC	EC	3.28089	2.23601e-05	0.000145453	PF07714	KOG0192	2.7.12.1	0	0	GO:0004672,GO:0006468	0	AT3G22750	protein kinase domain containing protein, expressed; Protein kinase superfamily protein	Protein kinase superfamily protein	Pkinase_Tyr, Pkinase, Kinase-like, Pkinase_fungal, Haspin_kinase, APH	Pkinase_Tyr, Pkinase, Kinase-like, Pkinase_fungal, Haspin_kinase, APH
Gohir.A11G299900.1	NEC	EC	3.27842	1.41866e-08	1.96235e-07	PF00091,PF03953	KOG1376	0	0	K07374	GO:0005874,GO:0003924,GO:0007017	0	AT5G19780	tubulin/FtsZ domain containing protein, putative, expressed; tubulin alpha-5	tubulin alpha-3	Tubulin, Tubulin_C, Tubulin_3	Tubulin, Tubulin_C, Tubulin_3
Gohir.A08G141500.1	NEC	EC	3.27681	9.25175e-05	0.000514327	PF00319,PF01486	KOG0014	0	0	0	GO:0005634,GO:0006355,GO:0003677,GO:0046983,GO:0003700	0	AT5G13790	OsMADS27 - MADS-box family gene with MIKCc type-box, expressed; AGAMOUS-like 15	AGAMOUS-like 15	SRF-TF, K-box	SRF-TF, K-box
Gohir.A09G040400.1	NEC	EC	3.27671	4.13134e-16	2.45722e-14	PF00046,PF01852	KOG0483	0	0	0	GO:0008289,GO:0003677	0	AT3G61150	homeobox and START domains containing protein, putative, expressed; homeodomain GLABROUS 1	Homeobox-leucine zipper family protein / lipid-binding START domain-containing protein	START, Homeodomain, Homeobox_KN, Cep57_CLD_2, DRMBL	START, Homeodomain, Homeobox_KN, Cep57_CLD_2, DRMBL
Gohir.D05G120500.1	NEC	EC	3.27642	1.719e-10	3.6308e-09	PF03106	0	0	0	0	GO:0003700,GO:0043565,GO:0006355	0	AT1G80840	WRKY71, expressed; WRKY DNA-binding protein 40	WRKY DNA-binding protein 40	WRKY, OAD_gamma, FPP, Leu_zip, ZapB, RP-C_C, APG6_N, AATF-Che1, SKA1, Virul_Fac, ERM	WRKY, OAD_gamma, FPP, Leu_zip, ZapB, RP-C_C, APG6_N, AATF-Che1, SKA1, Virul_Fac, ERM
Gohir.A01G059700.1	NEC	EC	3.27491	9.58815e-10	1.72014e-08	PF00201	KOG1192	2.4.2.51	0	0	GO:0008152,GO:0016758	0	AT4G27560	UDP-glucoronosyl and UDP-glucosyl transferase domain containing protein, expressed; UDP-Glycosyltransferase superfamily protein	UDP-Glycosyltransferase superfamily protein	UDPGT, DUF2642, Glyco_transf_28, ASL_C, Glyco_tran_28_C	UDPGT, DUF2642, Glyco_transf_28, ASL_C, Glyco_tran_28_C
Gohir.A06G123800.1	NEC	EC	3.27437	2.66426e-20	3.02521e-18	PF00459	KOG1528	3.1.3.7	0	0	GO:0046854	0	AT5G54390	inositol-1-monophosphatase, putative, expressed; HAL2-like	HAL2-like	Inositol_P	Inositol_P
Gohir.D06G019090.1	NEC	EC	3.2733	0.189487	0.316707	0	0	0	0	0	0	0	NA	NA	0	#N/A	#N/A
Gohir.A02G168800.1	NEC	EC	3.27274	3.40151e-11	8.25184e-10	PF00171	KOG2456	1.2.1.3	0	K00128	GO:0016491,GO:0055114,GO:0008152	0	AT4G36250	aldehyde dehydrogenase, putative, expressed; aldehyde dehydrogenase 3F1	aldehyde dehydrogenase 3F1	Aldedh	Aldedh
Gohir.A10G126400.4	NEC	EC	3.272	1.87828e-06	1.60599e-05	PF00862,PF00534,PF05116	KOG0853	2.4.1.14	0	K00696	GO:0016157,GO:0005985	0	AT1G04920	sucrose-phosphate synthase, putative, expressed; sucrose phosphate synthase 3F	sucrose phosphate synthase 3F	Glycos_transf_1, Glyco_trans_1_4, S6PP, Sucrose_synth, Glyco_transf_4, Glyco_trans_4_4, DUF1752, Glyco_trans_1_2, SAP	Glycos_transf_1, Glyco_trans_1_4, S6PP, Sucrose_synth, Glyco_transf_4, Glyco_trans_4_4, DU
Gohir.D07G089500.1	NEC	EC	3.27102	2.05609e-08	2.75101e-07	PF00759	0	3.2.1.4	SignalP-noTM	0	GO:0004553,GO:0005975	0	AT2G32990	endoglucanase, putative, expressed; glycosyl hydrolase 9B8	glycosyl hydrolase 9B8	Glyco_hydro_9, TraD_N	Glyco_hydro_9, TraD_N
Gohir.A03G050650.1	NEC	EC	3.27087	1.13181e-06	1.01485e-05	PF00201	KOG1192	2.4.1.91	0	0	GO:0016758,GO:0008152	0	AT2G29730	UDP-glucoronosyl and UDP-glucosyl transferase domain containing protein, expressed; UDP-glucosyl transferase 71D1	UDP-glucosyl transferase 71D1	UDPGT, Glyco_tran_28_C, Trm5_N	UDPGT, Glyco_tran_28_C, Trm5_N
Gohir.A09G230600.1	NEC	EC	3.26913	0.00305249	0.0108756	PF05512	0	0	0	0	0	0	AT1G04560	AWPM-19-like membrane family protein, putative, expressed; AWPM-19-like family protein	AWPM-19-like family protein	AWPM-19	AWPM-19
Gohir.D12G159500.1	NEC	EC	3.26857	6.49816e-07	6.17152e-06	PF01852,PF00046	KOG2251	0	0	K09338	GO:0003677,GO:0008289	0	AT1G05230	homeobox and START domains containing protein, putative, expressed; homeodomain GLABROUS 2	homeodomain GLABROUS 2	START, Homeodomain, YabA, Homeobox_KN, zf-Mss51, zf_Rg, DivIC, ZapB, PikAIV_N	START, Homeodomain, YabA, Homeobox_KN, zf-Mss51, zf_Rg, DivIC, ZapB, PikAIV_N
Gohir.D11G193300.1	NEC	EC	3.26819	2.16112e-08	2.87822e-07	PF00348	KOG0776	2.5.1.29	0	K13789	GO:0008299	0	AT4G36810	polyprenyl synthetase, putative, expressed; geranylgeranyl pyrophosphate synthase 1	geranylgeranyl pyrophosphate synthase 1	polyprenyl_synt, UbiA	polyprenyl_synt, UbiA
Gohir.D12G104700.1	NEC	EC	3.26782	9.74115e-08	1.11762e-06	PF07279	0	0	0	0	0	0	AT5G62280	expressed protein; Protein of unknown function (DUF1442)	Protein of unknown function (DUF1442)	DUF1442	DUF1442
Gohir.D02G017400.1	NEC	EC	3.2676	5.00431e-05	0.000297529	PF12643	0	3.6.1.12	0	0	GO:0009143,GO:0047429	K16904	AT3G25400	MazG nucleotide pyrophosphohydrolase domain containing protein, expressed	0	MazG-like, MazG	MazG-like, MazG
Gohir.A10G175600.1	NEC	EC	3.26759	2.28851e-05	0.000148354	PF00069	KOG1187	2.7.11.1	0	0	GO:0006468,GO:0004672,GO:0005524	0	AT4G32300	lectin protein kinase family protein, putative, expressed; S-domain-2 5	S-domain-2 5	Pkinase, Pkinase_Tyr, Kinase-like, PIP49_C, Pkinase_fungal, YukC, APH	Pkinase, Pkinase_Tyr, Kinase-like, PIP49_C, Pkinase_fungal, YukC, APH
Gohir.A01G201800.2	NEC	EC	3.26736	0.00916541	0.02746	0	0	0	0	0	0	0	NA	NA	embryo sac development arrest 12	#N/A	#N/A
Gohir.D05G067300.1	NEC	EC	3.26662	4.80862e-09	7.35846e-08	PF00702,PF00122	KOG0205	3.6.3.6	SignalP-noTM	K01535	0	0	AT2G24520	plasma membrane ATPase, putative, expressed; H(+)-ATPase 5	H(+)-ATPase 5	E1-E2_ATPase, Hydrolase, Hydrolase_3, Cation_ATPase	E1-E2_ATPase, Hydrolase, Hydrolase_3, Cation_ATPase
Gohir.A06G087100.1	NEC	EC	3.26482	4.00552e-14	1.6813e-12	PF00069,PF08263	KOG1187	2.7.11.1	SignalP-noTM	0	GO:0004672,GO:0006468,GO:0005524	0	AT1G68400	inactive receptor kinase At2g26730 precursor, putative, expressed; leucine-rich repeat transmembrane protein kinase family protein	leucine-rich repeat transmembrane protein kinase family protein	Pkinase, Pkinase_Tyr, LRRNT_2, LRR_8, APH, LRR_4	Pkinase, Pkinase_Tyr, LRRNT_2, LRR_8, APH, LRR_4
Gohir.D11G192800.1	NEC	EC	3.26442	1.25633e-06	1.11483e-05	PF07714	KOG0192	2.7.12.1	0	0	GO:0004672,GO:0006468	0	AT5G66710	protein kinase domain containing protein, expressed; Protein kinase superfamily protein	Protein kinase superfamily protein	Pkinase_Tyr, Pkinase, Kinase-like, Pkinase_fungal, APH, Kdo	Pkinase_Tyr, Pkinase, Kinase-like, Pkinase_fungal, APH, Kdo
Gohir.D12G261800.1	NEC	EC	3.26418	0.00641451	0.0203153	PF00847	0	0	0	0	GO:0003700,GO:0006355	0	AT5G51990	dehydration-responsive element-binding protein, putative, expressed; C-repeat-binding factor 4	C-repeat-binding factor 4	AP2	AP2
Gohir.D07G058700.1	NEC	EC	3.26411	1.60952e-07	1.76303e-06	PF13177	KOG0989	2.7.7.7	0	0	0	0	AT4G24790	ATP binding protein, putative, expressed; AAA-type ATPase family protein	AAA-type ATPase family protein	DNA_pol3_delta2, AAA, DNA_pol3_gamma3, AAA_33, AAA_22, AAA_16, RuvB_N, AAA_30	DNA_pol3_delta2, AAA, DNA_pol3_gamma3, AAA_33, AAA_22, AAA_16, RuvB_N, AAA_30
Gohir.D08G199000.1	NEC	EC	3.26212	3.87974e-15	1.94046e-13	0	0	0	0	0	0	0	NA	NA	0	PP2C_C	PP2C_C
Gohir.D04G144300.1	NEC	EC	3.26205	1.39619e-06	1.22715e-05	PF00561	KOG4178	3.3.2.10	0	0	0	0	NA	NA	alpha/beta-Hydrolases superfamily protein	Abhydrolase_1, Abhydrolase_6, Hydrolase_4, Ndr, FSH1	Abhydrolase_1, Abhydrolase_6, Hydrolase_4, Ndr, FSH1
Gohir.D03G020200.1	NEC	EC	3.26161	1.27624e-06	1.1314e-05	PF00160,PF00515	KOG0546	5.2.1.8	0	K05864	GO:0005515,GO:0003755,GO:0000413	0	AT2G15790	peptidyl-prolyl cis-trans isomerase CYP40, putative, expressed; peptidyl-prolyl cis-trans isomerase / cyclophilin-40 (CYP40) / rotamase	peptidyl-prolyl cis-trans isomerase / cyclophilin-40 (CYP40) / rotamase	Pro_isomerase, TPR_1, TPR_2, TPR_8, TPR_11, TPR_14, TPR_6, TPR_7, TPR_19, TPR_16	Pro_isomerase, TPR_1, TPR_2, TPR_8, TPR_11, TPR_14, TPR_6, TPR_7, TPR_19, TPR_16
Gohir.A12G076600.1	NEC	EC	3.26087	9.04609e-16	5.05509e-14	PF00651,PF03000	0	0	0	0	GO:0005515	0	AT3G49900	expressed protein; Phototropic-responsive NPH3 family protein	Phototropic-responsive NPH3 family protein	BTB, NPH3, Cep57_CLD, DUF3342, APC_N_CC, Sec2p	BTB, NPH3, Cep57_CLD, DUF3342, APC_N_CC, Sec2p
Gohir.D13G145132.1	NEC	EC	3.26069	0.000159202	0.000825742	PF08387	0	0	0	0	0	0	NA	NA	F-box/RNI-like superfamily protein	FBD	FBD
Gohir.A07G191400.1	NEC	EC	3.25865	6.75406e-11	1.53835e-09	0	0	0	0	0	0	0	AT5G35770	Transducin/WD40 repeat-like superfamily protein	Transducin/WD40 repeat-like superfamily protein	F-box-like, WD40, ANAPC4_WD40, SARS_X4	F-box-like, WD40, ANAPC4_WD40, SARS_X4
Gohir.A06G146300.1	NEC	EC	3.25658	0.000341017	0.00160962	PF00046,PF01852	0	0	0	K09338	GO:0003677,GO:0008289	0	AT4G04890	homeobox and START domains containing protein, putative, expressed; protodermal factor 2	protodermal factor 2	START, Homeodomain, Homeobox_KN, DivIC, DUF2031, HALZ, NRBF2	START, Homeodomain, Homeobox_KN, DivIC, DUF2031, HALZ, NRBF2
Gohir.A02G080900.1	NEC	EC	3.25541	4.1058e-08	5.10893e-07	0	0	0	0	0	0	0	NA	NA	ZCF37	Pex24p	Pex24p
Gohir.D02G175700.2	NEC	EC	3.25468	4.93511e-07	4.8269e-06	PF00854	KOG1237	0	0	0	GO:0005215,GO:0006810,GO:0016020	0	AT5G13400	peptide transporter PTR2, putative, expressed; Major facilitator superfamily protein	Major facilitator superfamily protein	PTR2, MFS_1, DUF2207	PTR2, MFS_1, DUF2207
Gohir.A03G095800.1	NEC	EC	3.25453	1.3433e-05	9.27248e-05	PF16845	0	0	SignalP-noTM	K13899	GO:0004869	0	NA	NA	PHYTOCYSTATIN 2	SQAPI, Cystatin	SQAPI, Cystatin
Gohir.D02G166900.1	NEC	EC	3.2543	4.28801e-07	4.26255e-06	PF02181	KOG1922	0	SignalP-noTM	0	0	0	AT1G70140	formin-like protein 3 precursor, putative, expressed; formin 8	formin 8	FH2	FH2
Gohir.A09G145050.1	NEC	EC	3.25414	3.55806e-05	0.000220035	PF07786	KOG4683	2.3.1.78	0	0	0	0	AT5G27730	heparan-alpha-glucosaminide N-acetyltransferase, putative, expressed; Protein of unknown function (DUF1624)	Protein of unknown function (DUF1624)	DUF1624, DUF5009, DMT_YdcZ	DUF1624, DUF5009, DMT_YdcZ
Gohir.A03G011150.1	NEC	EC	3.25376	6.16944e-07	5.89445e-06	PF01554	KOG1347	0	0	K03327	GO:0015238,GO:0055085,GO:0006855,GO:0016020,GO:0015297	0	AT4G22790	MATE efflux family protein, putative, expressed; MATE efflux family protein	MATE efflux family protein	MatE, Polysacc_synt_C	MatE, Polysacc_synt_C
Gohir.A05G322100.1	NEC	EC	3.25328	5.15323e-07	5.01688e-06	PF13855,PF08263,PF00560,PF00069	KOG0594	2.7.11.1	SignalP-noTM	0	GO:0005524,GO:0005515,GO:0006468,GO:0004672	0	AT2G01210	expressed protein; Leucine-rich repeat protein kinase family protein	Leucine-rich repeat protein kinase family protein	Pkinase, Pkinase_Tyr, LRR_8, LRRNT_2, LRR_4, LRR_1, LRR_6	Pkinase, Pkinase_Tyr, LRR_8, LRRNT_2, LRR_4, LRR_1, LRR_6
Gohir.D10G233600.1	NEC	EC	3.25291	1.32186e-05	9.13676e-05	PF14226,PF03171	KOG0143	4.2.1.78	0	0	GO:0016491,GO:0055114	0	AT3G21420	leucoanthocyanidin dioxygenase, putative, expressed; 2-oxoglutarate (2OG) and Fe(II)-dependent oxygenase superfamily protein	2-oxoglutarate (2OG) and Fe(II)-dependent oxygenase superfamily protein	DIOX_N, 2OG-FeII_Oxy	DIOX_N, 2OG-FeII_Oxy
Gohir.A11G037800.1	NEC	EC	3.25049	2.3475e-07	2.4871e-06	PF04535	0	0	0	0	0	0	NA	NA	Uncharacterised protein family (UPF0497)	DUF588, YitT_membrane, PGG	DUF588, YitT_membrane, PGG
Gohir.A07G184700.1	NEC	EC	3.2503	3.86453e-14	1.63101e-12	PF00201	KOG1192	0	0	0	GO:0008152,GO:0016758	0	AT3G21760	UDP-glucoronosyl and UDP-glucosyl transferase domain containing protein, expressed; UDP-Glycosyltransferase superfamily protein	UDP-glucosyl transferase 71B6	UDPGT, Glyco_tran_28_C	UDPGT, Glyco_tran_28_C
Gohir.D07G195400.1	NEC	EC	3.24927	7.59246e-16	4.31054e-14	PF07172	0	0	SignalP-noTM	0	0	0	NA	NA	Glycine-rich protein family	GRP, Sar8_2, Keratin_2_head	GRP, Sar8_2, Keratin_2_head
Gohir.D10G014200.1	NEC	EC	3.2488	1.76346e-09	2.96243e-08	PF00067	KOG0156	0	0	0	GO:0016705,GO:0055114,GO:0020037,GO:0005506	0	AT1G11600	cytochrome P450, putative, expressed; cytochrome P450, family 77, subfamily B, polypeptide 1	cytochrome P450, family 77, subfamily B, polypeptide 1	p450	p450
Gohir.D07G150900.1	NEC	EC	3.24838	1.51997e-10	3.23855e-09	PF03171,PF14226	KOG0143	0	0	K05282	GO:0016491,GO:0055114	0	AT4G25420	gibberellin 20 oxidase 1, putative, expressed; 2-oxoglutarate (2OG) and Fe(II)-dependent oxygenase superfamily protein	2-oxoglutarate (2OG) and Fe(II)-dependent oxygenase superfamily protein	2OG-FeII_Oxy, DIOX_N, SATase_N	2OG-FeII_Oxy, DIOX_N, SATase_N
Gohir.A12G184400.1	NEC	EC	3.2465	3.06565e-08	3.94311e-07	PF00170	0	0	0	0	GO:0003700,GO:0006355	0	AT5G15830	bZIP transcription factor domain containing protein, expressed; basic leucine-zipper 3	basic leucine-zipper 70	bZIP_1, bZIP_2, bZIP_Maf, CENP-F_leu_zip, Jnk-SapK_ap_N, YabA, TSC22, ZapB, CtIP_N, DUF1664, DivIC, DUF3573, TEX13, YojJ, DivIVA, GIT_CC	bZIP_1, bZIP_2, bZIP_Maf, CENP-F_leu_zip, Jnk-SapK_ap_N, YabA, TSC22, ZapB, CtIP_N, DUF166
Gohir.D03G019600.1	NEC	EC	3.24444	2.35745e-05	0.000152215	PF02362	0	0	0	0	GO:0003677	0	NA	NA	AP2/B3-like transcriptional factor family protein	B3	B3
Gohir.A10G150100.1	NEC	EC	3.24368	7.1941e-12	1.99083e-10	PF00234	0	0	SignalP-noTM	0	0	0	AT2G38540	LTPL7 - Protease inhibitor/seed storage/LTP family protein precursor, expressed; lipid transfer protein 1	lipid transfer protein 1	Tryp_alpha_amyl, LTP_2, DUF4516	Tryp_alpha_amyl, LTP_2, DUF4516
Gohir.D01G046100.1	NEC	EC	3.24334	1.1019e-06	9.89954e-06	PF00201	KOG1192	2.4.1.297	0	0	GO:0016758,GO:0008152	0	AT5G54010	UDP-glucoronosyl and UDP-glucosyl transferase domain containing protein, expressed; UDP-Glycosyltransferase superfamily protein	UDP-Glycosyltransferase superfamily protein	UDPGT, Glyco_tran_28_C, PLC-beta_C, Glyco_transf_28, ASL_C, DUF2642	UDPGT, Glyco_tran_28_C, PLC-beta_C, Glyco_transf_28, ASL_C, DUF2642
Gohir.A02G156500.1	NEC	EC	3.24166	4.6642e-12	1.33551e-10	PF05911	0	0	0	0	0	0	AT2G23360	plant protein of unknown function DUF869 domain containing protein, expressed; Plant protein of unknown function (DUF869)	Plant protein of unknown function (DUF869)	FPP	FPP
Gohir.D05G109800.1	NEC	EC	3.24152	0.00190873	0.00726366	PF00067	KOG0156	1.14.13.117	0	K12153	GO:0005506,GO:0020037,GO:0016705,GO:0055114	0	AT4G39950	cytochrome P450, putative, expressed; cytochrome P450, family 79, subfamily B, polypeptide 2	cytochrome P450, family 79, subfamily B, polypeptide 2	p450, Thrombin_light	p450, Thrombin_light
Gohir.A07G002800.1	NEC	EC	3.23994	8.53024e-09	1.23478e-07	PF01061,PF00005,PF08370	KOG0065	3.6.3.17	0	0	GO:0016887,GO:0016020,GO:0005524	0	AT3G30842	pleiotropic drug resistance protein, putative, expressed; pleiotropic drug resistance 10	pleiotropic drug resistance 10	ABC2_membrane, ABC_tran, PDR_assoc, AAA_21, AAA_29, AAA_16, RsgA_GTPase, AAA_25, AAA_22, AAA_18, Rad17, AAA, AAA_30, AAA_33, SMC_N, AAA_23, NACHT, Zeta_toxin, cobW, MMR_HSR1, TsaE, AAA_28, PduV-EutP, AAA_17, AAA_5, NTPase_1, Roc, RuvB_N, FeoB_N, T2SSE, AAA_15, AAA_24, AAA_7, MobB, Ploopntkinase3, Viral_helicase1, RNA_helicase, AAA_19, AAA_14, NB-ARC, SRPRB, Mg_chelatase, SRP54, PDR_CDR	ABC2_membrane, ABC_tran, PDR_assoc, AAA_21, AAA_29, AAA_16, RsgA_GTPase, AAA_25, AAA_22, A
Gohir.A09G086566.1	NEC	EC	3.23796	8.74933e-05	0.000488985	PF16488,PF16487	0	0	0	0	0	0	AT2G27880	PAZ domain containing protein, putative, expressed; Argonaute family protein	Argonaute family protein	ArgoL2, ArgoMid	ArgoL2, ArgoMid
Gohir.D04G000005.1	NEC	EC	3.23771	3.99776e-06	3.14276e-05	PF00892	0	0	0	0	GO:0022857,GO:0016021,GO:0016020	0	NA	NA	nodulin MtN21 /EamA-like transporter family protein	EamA, YtpI, Trp_oprn_chp, DUF4231	EamA, YtpI, Trp_oprn_chp, DUF4231
Gohir.D13G063300.1	NEC	EC	3.23671	1.08634e-14	5.08139e-13	PF02298	0	0	SignalP-noTM	0	GO:0009055	0	NA	NA	uclacyanin 1	Cu_bind_like, Trypan_PARP	Cu_bind_like, Trypan_PARP
Gohir.D08G197000.1	NEC	EC	3.23619	5.51963e-07	5.33314e-06	0	0	0	0	0	0	0	NA	NA	0	DUF4378	DUF4378
Gohir.A05G168100.1	NEC	EC	3.23372	0.00735635	0.0228365	PF01946	KOG2960	0	0	K03146	0	0	AT5G54770	FAD dependent oxidoreductase domain containing protein, expressed; thiazole biosynthetic enzyme, chloroplast (ARA6) (THI1) (THI4)	thiazole biosynthetic enzyme, chloroplast (ARA6) (THI1) (THI4)	Thi4, FAD_binding_2, DAO, NAD_binding_8, Pyr_redox_2, FAD_oxidored, HI0933_like, Lycopene_cycl, GIDA, GMC_oxred_N, Pyr_redox_3, NAD_binding_9, FAD_binding_3, RNA_pol_Rpb1_3	Thi4, FAD_binding_2, DAO, NAD_binding_8, Pyr_redox_2, FAD_oxidored, HI0933_like, Lycopene_
Gohir.A02G102501.1	NEC	EC	3.23255	0.00195449	0.00740672	PF00847	0	0	0	0	GO:0006355,GO:0003700	0	AT4G23750	AP2 domain containing protein, expressed; cytokinin response factor 2	cytokinin response factor 2	AP2	AP2
Gohir.D11G191100.1	NEC	EC	3.23231	5.47511e-10	1.03657e-08	PF00067	KOG0157	0	0	K09587	GO:0055114,GO:0020037,GO:0016705,GO:0005506	0	AT3G50660	cytochrome P450, putative, expressed; Cytochrome P450 superfamily protein	Cytochrome P450 superfamily protein	p450	p450
Gohir.D06G172800.3	NEC	EC	3.22976	1.89923e-05	0.000125495	0	0	0	0	0	0	0	NA	NA	0	MBD, PAP1	MBD, PAP1
Gohir.D09G041200.1	NEC	EC	3.22768	1.57109e-09	2.66543e-08	PF00046,PF01852	KOG0483	0	0	0	GO:0003677,GO:0008289	0	AT3G61150	homeobox and START domains containing protein, putative, expressed; homeodomain GLABROUS 1	Homeobox-leucine zipper family protein / lipid-binding START domain-containing protein	START, Homeodomain, Homeobox_KN, Cep57_CLD_2	START, Homeodomain, Homeobox_KN, Cep57_CLD_2
Gohir.D09G043276.1	NEC	EC	3.22744	4.88265e-06	3.76078e-05	PF01554	KOG1347	0	0	K03327	GO:0015238,GO:0006855,GO:0055085,GO:0016020,GO:0015297	0	AT4G25640	MATE efflux family protein, putative, expressed; detoxifying efflux carrier 35	detoxifying efflux carrier 35	MatE, Polysacc_synt_C	MatE, Polysacc_synt_C
Gohir.D09G121100.1	NEC	EC	3.22744	3.52444e-12	1.03415e-10	0	0	0	0	0	0	0	AT3G57670	ZOS6-05 - C2H2 zinc finger protein, expressed; C2H2-type zinc finger family protein	C2H2-type zinc finger family protein	zf-H2C2_2, zf-C2H2_6, zf-C2H2, zf-C2H2_4, zf-met, zf-C2H2_2, Elf1, zf-C2H2_jaz	zf-H2C2_2, zf-C2H2_6, zf-C2H2, zf-C2H2_4, zf-met, zf-C2H2_2, Elf1, zf-C2H2_jaz
Gohir.A13G147400.1	NEC	EC	3.22608	1.13647e-13	4.39872e-12	0	0	0	0	0	0	0	AT3G15095	expressed protein	0	#N/A	#N/A
Gohir.D08G123900.3	NEC	EC	3.22564	1.53989e-05	0.000104424	PF14215	0	0	0	0	0	0	NA	NA	Serine/threonine-protein kinase WNK (With No Lysine)-related	bHLH-MYC_N, HLH, GAF_2	bHLH-MYC_N, HLH, GAF_2
Gohir.A06G023200.1	NEC	EC	3.22533	0.01997	0.0524789	0	0	0	0	0	0	0	NA	NA	Glycosyl hydrolase family 35 protein	#N/A	#N/A
Gohir.A07G132900.1	NEC	EC	3.22316	4.38801e-06	3.41221e-05	0	0	0	0	0	GO:0031011	0	AT1G02290	expressed protein	0	#N/A	#N/A
Gohir.A12G136500.1	NEC	EC	3.22182	1.34136e-11	3.51813e-10	PF00781,PF00609	0	2.7.1.107	0	0	GO:0004143,GO:0016301,GO:0007205	0	AT2G20900	diacylglycerol kinase, putative, expressed; diacylglycerol kinase 5	diacylglycerol kinase 5	DAGK_acc, DAGK_cat, NAD_kinase, FAM176	DAGK_acc, DAGK_cat, NAD_kinase, FAM176
Gohir.A01G181500.2	NEC	EC	3.21996	1.87294e-10	3.92011e-09	PF00501,PF13193	KOG1256	6.2.1.3	0	K01897	GO:0003824,GO:0008152	0	AT1G49430	AMP-binding enzyme, putative, expressed; long-chain acyl-CoA synthetase 2	long-chain acyl-CoA synthetase 2	AMP-binding, AMP-binding_C	AMP-binding, AMP-binding_C
Gohir.A12G091288.1	NEC	EC	3.2199	0.000337821	0.00159616	PF13534,PF13085	0	1.3.5.1	0	0	GO:0009055,GO:0051536	0	AT5G65165	succinate dehydrogenase and fumarate reductase iron-sulfur protein, expressed; succinate dehydrogenase 2-3	succinate dehydrogenase 2-3	Fer2_3, Fer4_17, Fer4_8, Fer4_10, Fer4_7, Fer2, Fer4_16, Fer4_9	Fer2_3, Fer4_17, Fer4_8, Fer4_10, Fer4_7, Fer2, Fer4_16, Fer4_9
Gohir.A13G223400.1	NEC	EC	3.21857	0.000303581	0.00145476	PF02450	0	2.3.1.20	0	0	GO:0008374,GO:0006629	0	AT3G44830	lecithine cholesterol acyltransferase, putative, expressed; Lecithin:cholesterol acyltransferase family protein	Lecithin:cholesterol acyltransferase family protein	LCAT, Lipase_2, DUF4708	LCAT, Lipase_2, DUF4708
Gohir.D08G256000.1	NEC	EC	3.21837	1.96333e-15	1.03933e-13	PF12076,PF04116	0	0	0	0	GO:0008610,GO:0055114,GO:0016491,GO:0005506	0	AT5G57800	WAX2, putative, expressed; Fatty acid hydroxylase superfamily	Fatty acid hydroxylase superfamily	Wax2_C, FA_hydroxylase, adh_short, DUF2782, Fumarate_red_D	Wax2_C, FA_hydroxylase, adh_short, DUF2782, Fumarate_red_D
Gohir.A03G169400.2	NEC	EC	3.21069	3.36731e-08	4.26933e-07	PF03479	0	0	0	0	0	0	AT4G35390	DNA binding protein, putative, expressed; AT-hook protein of GA feedback 1	AT-hook protein of GA feedback 1	DUF296	DUF296
Gohir.D10G141000.1	NEC	EC	3.20848	9.63124e-10	1.72556e-08	PF07983	0	0	SignalP-noTM	0	0	0	AT4G13600	X8 domain containing protein, expressed; Carbohydrate-binding X8 domain superfamily protein	Carbohydrate-binding X8 domain superfamily protein	X8	X8
Gohir.A12G221200.1	NEC	EC	3.20843	9.86158e-19	8.78118e-17	0	0	0	0	0	0	0	AT1G12330	expressed protein	0	Dor1, DUF489, Flu_NS2	Dor1, DUF489, Flu_NS2
Gohir.D13G211952.1	NEC	EC	3.20842	9.47099e-10	1.70208e-08	PF12076,PF04116	0	0	0	0	GO:0055114,GO:0008610,GO:0016491,GO:0005506	0	AT5G57800	WAX2, putative, expressed; Fatty acid hydroxylase superfamily	Fatty acid hydroxylase superfamily	Wax2_C, FA_hydroxylase, adh_short, KR	Wax2_C, FA_hydroxylase, adh_short, KR
Gohir.D06G035150.1	NEC	EC	3.20652	2.78134e-19	2.73483e-17	PF13516	0	0	0	0	GO:0005515	0	AT4G08980	OsFBX192 - F-box domain containing protein, expressed; F-BOX WITH WD-40 2	F-BOX WITH WD-40 2	LRR_6, F-box-like, F-box	LRR_6, F-box-like, F-box
Gohir.D02G029100.1	NEC	EC	3.2049	7.77948e-17	5.16553e-15	PF00067	KOG0157	1.14.13.173	0	0	GO:0055114,GO:0005506,GO:0020037,GO:0016705	0	NA	NA	cytochrome P450, family 709, subfamily B, polypeptide 1	p450	p450
Gohir.A01G079600.1	NEC	EC	3.20477	3.80047e-17	2.65922e-15	PF13639	0	0	0	0	0	0	AT3G20395	RING-H2 finger protein ATL2B, putative, expressed; RING/U-box superfamily protein	RING/U-box superfamily protein	zf-RING_2, zf-rbx1, zf-RING_11, zf-C3HC4_2, zf-C3HC4, zf-RING_UBOX, zf-RING_5, zf-ANAPC11, zf-C3HC4_3, Gly-zipper_YMGG, DUF5518, zf-RING_4, Prok-RING_4, Gly-zipper_Omp, FANCL_C, Zn_ribbon_17, zf-Nse, RINGv, DUF1404, zf-C3HC4_4, zf-RING-like, Prok-RING_1, DUF1269, Transgly_assoc, Gly-zipper_OmpA, Rick_17kDa_Anti	zf-RING_2, zf-rbx1, zf-RING_11, zf-C3HC4_2, zf-C3HC4, zf-RING_UBOX, zf-RING_5, zf-ANAPC11,
Gohir.A07G159900.1	NEC	EC	3.20455	1.23242e-05	8.59051e-05	PF04526	0	0	SignalP-noTM	0	0	0	AT3G07390	AIR12, putative, expressed; auxin-responsive family protein	auxin-responsive family protein	DUF568	DUF568
Gohir.D12G203800.1	NEC	EC	3.20237	0.000216631	0.00108524	PF06749	0	0	0	0	0	0	AT1G31720	expressed protein; Protein of unknown function (DUF1218)	Protein of unknown function (DUF1218)	DUF1218, DUF2583, TMEM37	DUF1218, DUF2583, TMEM37
Gohir.A04G125100.1	NEC	EC	3.20164	5.99208e-10	1.12294e-08	PF10250	0	0	0	0	0	0	AT1G76270	growth regulator related protein, putative, expressed; O-fucosyltransferase family protein	root hair specific 17	O-FucT	O-FucT
Gohir.D10G129101.1	NEC	EC	3.20157	6.08658e-16	3.51606e-14	PF13540,PF00020	0	2.7.11.1	0	0	GO:0005515	0	AT3G59420	TKL_IRAK_CR4L.1 - The CR4L subfamily has homology with Crinkly4, expressed; crinkly4	crinkly4	RCC1_2, TNFR_c6, RCC1	RCC1_2, TNFR_c6, RCC1
Gohir.D09G039700.1	NEC	EC	3.20104	7.54152e-15	3.65712e-13	PF00069	KOG1187	2.7.11.1	0	K13430	GO:0006468,GO:0004672,GO:0005524	0	AT5G13160	protein kinase domain containing protein, expressed; Protein kinase superfamily protein	Protein kinase superfamily protein	Pkinase, Pkinase_Tyr, SBF	Pkinase, Pkinase_Tyr, SBF
Gohir.D02G042800.1	NEC	EC	3.19983	0.000345802	0.00163021	PF03552	0	2.4.1.12	0	0	GO:0016020,GO:0016760,GO:0030244	0	NA	NA	cellulose synthase like G2	Cellulose_synt, Glyco_trans_2_3	Cellulose_synt, Glyco_trans_2_3
Gohir.A05G204700.1	NEC	EC	3.19969	1.6337e-05	0.000109994	PF00179	KOG0424	6.3.2.19	0	0	GO:0019789	0	AT3G57870	ubiquitin-conjugating enzyme, putative, expressed; sumo conjugation enzyme 1	sumo conjugation enzyme 1	UQ_con, Prok-E2_B	UQ_con, Prok-E2_B
Gohir.D05G175200.1	NEC	EC	3.19932	0.0228331	0.0585771	PF04885	0	0	SignalP-noTM	0	0	0	NA	NA	Stigma-specific Stig1 family protein	Stig1	Stig1
Gohir.A12G141700.1	NEC	EC	3.19856	4.32167e-29	1.62375e-26	0	0	0	0	0	0	0	NA	NA	0	#N/A	#N/A
Gohir.D12G209800.1	NEC	EC	3.19581	1.36301e-13	5.22739e-12	PF00664,PF00005	KOG0055	3.6.3.44	0	K05658	GO:0055085,GO:0005524,GO:0006810,GO:0042626,GO:0016021,GO:0016887	0	AT4G25960	multidrug resistance protein, putative, expressed; P-glycoprotein 2	P-glycoprotein 2	ABC_membrane, ABC_tran, SMC_N, ABC_ATPase, AAA_29, AAA_16, AAA_22, Zeta_toxin, AAA_15, RsgA_GTPase, AAA_30, SbcCD_C, DUF87, AAA, AAA_21, APS_kinase, G-alpha, AAA_7, Pox_A32, AAA_23, AAA_24, AAA_19, AAA_5, AAA_25	ABC_membrane, ABC_tran, SMC_N, ABC_ATPase, AAA_29, AAA_16, AAA_22, Zeta_toxin, AAA_15, Rsg
Gohir.D01G125800.1	NEC	EC	3.19579	6.93355e-08	8.20766e-07	PF11960,PF00487	0	1.14.19.6	0	0	GO:0055114,GO:0006629,GO:0016717	0	AT3G12120	fatty acid desaturase, putative, expressed; fatty acid desaturase 2	fatty acid desaturase 2	FA_desaturase, DUF3474	FA_desaturase, DUF3474
Gohir.A02G022000.1	NEC	EC	3.19303	3.77164e-11	9.06077e-10	PF00067	KOG0157	1.14.13.173	0	0	GO:0055114,GO:0005506,GO:0016705,GO:0020037	0	AT3G14630	cytochrome P450 72A1, putative, expressed; cytochrome P450, family 72, subfamily A, polypeptide 9	cytochrome P450, family 72, subfamily A, polypeptide 9	p450, Flu_NS2	p450, Flu_NS2
Gohir.A13G048000.1	NEC	EC	3.19098	1.55927e-10	3.31769e-09	PF01490	KOG1303	0	0	0	0	0	AT5G49630	amino acid transporter, putative, expressed; amino acid permease 6	amino acid permease 1	Aa_trans	Aa_trans
Gohir.D05G077600.1	NEC	EC	3.1903	0.000299036	0.00143571	PF02121	KOG3668	0	0	0	GO:0005622,GO:0006810	0	NA	NA	0	IP_trans, PRELI	IP_trans, PRELI
Gohir.D01G216500.3	NEC	EC	3.19009	6.80562e-07	6.43443e-06	PF11960,PF00487	0	0	0	0	GO:0055114,GO:0016717,GO:0006629	0	AT3G11170	omega-3 fatty acid desaturase, chloroplast precursor, putative, expressed; fatty acid desaturase 7	fatty acid desaturase 8	DUF3474, FA_desaturase	DUF3474, FA_desaturase
Gohir.A01G126300.2	NEC	EC	3.18758	1.40252e-14	6.43018e-13	PF00175,PF00258,PF00667	KOG1158	1.6.2.4	0	0	GO:0016491,GO:0010181,GO:0055114	0	AT4G24520	NADPH reductase, putative, expressed; P450 reductase 1	P450 reductase 1	FAD_binding_1, Flavodoxin_1, NAD_binding_1, Flavodoxin_5	FAD_binding_1, Flavodoxin_1, NAD_binding_1, Flavodoxin_5
Gohir.D08G269300.1	NEC	EC	3.18681	3.79685e-05	0.000232994	0	0	0	0	0	0	0	NA	NA	0	MSA-2c, DUF2457	MSA-2c, DUF2457
Gohir.A10G092300.1	NEC	EC	3.18345	5.96827e-06	4.51494e-05	PF00685	0	0	0	0	GO:0008146	0	AT3G50620	nodulation protein-related, putative, expressed; P-loop containing nucleoside triphosphate hydrolases superfamily protein	P-loop containing nucleoside triphosphate hydrolases superfamily protein	Sulfotransfer_1, Sulfotransfer_3	Sulfotransfer_1, Sulfotransfer_3
Gohir.D03G090000.1	NEC	EC	3.17941	0.048948	0.109624	0	0	0	0	0	0	0	AT3G03790	regulator of chromosome condensation/beta-lactamase-inhibitor protein II, putative, expressed; ankyrin repeat family protein / regulator of chromosome condensation (RCC1) family protein	ankyrin repeat family protein / regulator of chromosome condensation (RCC1) family protein	RCC1_2	RCC1_2
Gohir.A10G064500.1	NEC	EC	3.17848	1.406e-10	3.01517e-09	PF00657	0	3.1.1.3	SignalP-noTM	0	GO:0016788	0	AT3G16370	GDSL-like lipase/acylhydrolase, putative, expressed; GDSL-like Lipase/Acylhydrolase superfamily protein	GDSL-like Lipase/Acylhydrolase superfamily protein	Lipase_GDSL, DUF4404, Lipase_GDSL_3	Lipase_GDSL, DUF4404, Lipase_GDSL_3
Gohir.A07G203700.1	NEC	EC	3.17774	2.86796e-13	1.03871e-11	PF02141,PF03456	0	0	0	0	0	0	AT2G20320	DENN domain containing protein, expressed; DENN (AEX-3) domain-containing protein	DENN (AEX-3) domain-containing protein	DENN, uDENN, dDENN	DENN, uDENN, dDENN
Gohir.D01G147000.1	NEC	EC	3.17738	0.00011401	0.000617326	PF14368	0	0	SignalP-noTM	0	0	0	AT1G27950	LTPL80 - Protease inhibitor/seed storage/LTP family protein precursor, expressed; glycosylphosphatidylinositol-anchored lipid protein transfer 1	glycosylphosphatidylinositol-anchored lipid protein transfer 1	LTP_2, Tryp_alpha_amyl, Hydrophob_seed	LTP_2, Tryp_alpha_amyl, Hydrophob_seed
Gohir.D01G077850.1	NEC	EC	3.17732	8.26241e-06	6.02365e-05	PF03151	KOG1441	0	0	0	0	0	AT5G55950	transporter-related, putative, expressed; Nucleotide/sugar transporter family protein	Nucleotide/sugar transporter family protein	TPT, EamA, FA_desaturase	TPT, EamA, FA_desaturase
Gohir.A09G018150.1	NEC	EC	3.17687	4.34995e-12	1.25251e-10	PF08167	0	0	0	0	0	0	AT1G30240	expressed protein	0	RIX1	RIX1
Gohir.D05G102100.1	NEC	EC	3.17623	5.23393e-22	7.65446e-20	PF12906	KOG1609	6.3.2.19	0	0	GO:0008270	0	AT5G60580	zinc finger, C3HC4 type, domain containing protein, expressed; RING/U-box superfamily protein	RING/U-box superfamily protein	RINGv, zf-RING_2, zf-RING-like	RINGv, zf-RING_2, zf-RING-like
Gohir.D10G091700.1	NEC	EC	3.17567	4.54972e-07	4.49659e-06	PF03765,PF00650	KOG1471	0	0	0	0	0	AT4G36490	phosphatidylinositol transfer, putative, expressed; SEC14-like 12	Sec14p-like phosphatidylinositol transfer family protein	CRAL_TRIO, CRAL_TRIO_N, GlcNAc	CRAL_TRIO, CRAL_TRIO_N, GlcNAc
Gohir.A07G222700.1	NEC	EC	3.17401	4.50741e-08	5.55926e-07	PF01277	0	0	0	0	GO:0012511,GO:0016021	0	AT3G01570	oleosin, putative, expressed; Oleosin family protein	Oleosin family protein	Oleosin, DUF1640, DUF1206, DUF3487	Oleosin, DUF1640, DUF1206, DUF3487
Gohir.D11G320100.1	NEC	EC	3.17225	4.05154e-06	3.18122e-05	PF03195	0	0	0	0	0	0	AT1G65620	DUF260 domain containing protein, putative, expressed; Lateral organ boundaries (LOB) domain family protein	Lateral organ boundaries (LOB) domain family protein	LOB, K_channel_TID	LOB, K_channel_TID
Gohir.A07G160000.1	NEC	EC	3.1719	0.00241807	0.00890428	PF00069	0	2.7.11.1	0	0	GO:0005524,GO:0006468,GO:0004672	0	AT4G13000	protein kinase, putative, expressed; AGC (cAMP-dependent, cGMP-dependent and protein kinase C) kinase family protein	AGC (cAMP-dependent, cGMP-dependent and protein kinase C) kinase family protein	Pkinase, Pkinase_Tyr, YrbL-PhoP_reg, FTA2, Kinase-like	Pkinase, Pkinase_Tyr, YrbL-PhoP_reg, FTA2, Kinase-like
Gohir.D02G121900.2	NEC	EC	3.1718	8.88962e-07	8.2001e-06	PF12799	0	0	0	0	0	0	AT1G48540	leucine-rich repeat family protein, putative, expressed; Outer arm dynein light chain 1 protein	Outer arm dynein light chain 1 protein	LRR_4, LRR_9, LRR_8, LRR_6, LRR_1, JIP_LZII	LRR_4, LRR_9, LRR_8, LRR_6, LRR_1, JIP_LZII
Gohir.D10G102700.1	NEC	EC	3.17158	1.58871e-05	0.00010734	PF00916,PF01740	KOG0236	0	0	K17469	GO:0008272,GO:0015116,GO:0008271,GO:0055085,GO:0016021,GO:0016020	0	AT5G10180	sulfate transporter, putative, expressed; slufate transporter 2;1	slufate transporter 2;1	Sulfate_transp, STAS	Sulfate_transp, STAS
Gohir.D09G220000.1	NEC	EC	3.16966	0.00414731	0.0140619	PF00190,PF04702	0	0	SignalP-noTM	0	GO:0045735	0	NA	NA	cupin family protein	Vicilin_N, Cupin_1, Cupin_2, AraC_binding, DUF3506, Cupin_6, CENP-C_C, Cupin_3, OATP	Vicilin_N, Cupin_1, Cupin_2, AraC_binding, DUF3506, Cupin_6, CENP-C_C, Cupin_3, OATP
Gohir.D06G219600.1	NEC	EC	3.16884	1.82795e-07	1.98322e-06	PF12146	KOG1455	2.3.1.22	0	0	0	0	AT5G14980	esterase/lipase/thioesterase family protein, putative, expressed; alpha/beta-Hydrolases superfamily protein	alpha/beta-Hydrolases superfamily protein	Hydrolase_4, Abhydrolase_6, Abhydrolase_1, Peptidase_S9, Abhydrolase_2, FSH1, Peptidase_S15	Hydrolase_4, Abhydrolase_6, Abhydrolase_1, Peptidase_S9, Abhydrolase_2, FSH1, Peptidase_S1
Gohir.D09G094200.1	NEC	EC	3.16842	1.2304e-21	1.70244e-19	PF00069	KOG0610	2.7.11.1	0	0	GO:0005524,GO:0006468,GO:0004672	0	AT3G44610	AGC_PVPK_like_kin82y.1 - ACG kinases include homologs to PKA, PKG and PKC, expressed; Protein kinase superfamily protein	Protein kinase superfamily protein	Pkinase, Pkinase_Tyr, Kinase-like, Kdo, Secretin_N_2	Pkinase, Pkinase_Tyr, Kinase-like, Kdo, Secretin_N_2
Gohir.A02G137700.1	NEC	EC	3.16795	7.50166e-08	8.81917e-07	PF00107,PF08240	KOG0023	0	0	K00083	GO:0055114	0	AT4G39330	dehydrogenase, putative, expressed; cinnamyl alcohol dehydrogenase 9	cinnamyl alcohol dehydrogenase 9	ADH_N, ADH_zinc_N, 2-Hacid_dh_C, ADH_zinc_N_2	ADH_N, ADH_zinc_N, 2-Hacid_dh_C, ADH_zinc_N_2
Gohir.A11G107100.1	NEC	EC	3.16617	5.2902e-05	0.000312756	PF15699	0	0	0	0	GO:0010112	0	NA	NA	NIM1-interacting 1	NPR1_interact, MscS_TM	NPR1_interact, MscS_TM
Gohir.A05G028700.1	NEC	EC	3.16579	1.51238e-06	1.31824e-05	PF00155	KOG0256	4.4.1.14	0	K01762	GO:0009058,GO:0030170	0	AT4G26200	aminotransferase, classes I and II, domain containing protein, expressed; 1-amino-cyclopropane-1-carboxylate synthase 7	1-amino-cyclopropane-1-carboxylate synthase 7	Aminotran_1_2, Beta_elim_lyase, PBP_like_2	Aminotran_1_2, Beta_elim_lyase, PBP_like_2
Gohir.A11G270300.1	NEC	EC	3.16531	3.03563e-08	3.91212e-07	0	0	0	0	0	0	0	AT3G05625	TPR repeat, putative, expressed; Tetratricopeptide repeat (TPR)-like superfamily protein	Tetratricopeptide repeat (TPR)-like superfamily protein	TPR_2, TPR_1, TPR_16, TPR_11, TPR_6, TPR_9, TPR_8, TPR_14, TPR_17, TPR_12	TPR_2, TPR_1, TPR_16, TPR_11, TPR_6, TPR_9, TPR_8, TPR_14, TPR_17, TPR_12
Gohir.A05G195600.1	NEC	EC	3.16521	1.97186e-23	3.51844e-21	PF00067	KOG0157	0	0	0	GO:0020037,GO:0016705,GO:0005506,GO:0055114	0	AT1G75130	cytochrome P450 72A1, putative, expressed; cytochrome P450, family 721, subfamily A, polypeptide 1	cytochrome P450, family 721, subfamily A, polypeptide 1	p450	p450
Gohir.D12G221500.1	NEC	EC	3.16461	0.000521297	0.00234487	0	0	0	0	0	0	0	AT1G62520	zinc finger family protein, putative, expressed	0	#N/A	#N/A
Gohir.A08G156100.1	NEC	EC	3.1642	3.44303e-06	2.74386e-05	0	0	0	0	0	0	0	NA	NA	0	DUF740	DUF740
Gohir.D13G206800.1	NEC	EC	3.16313	2.38573e-12	7.21088e-11	PF03006	KOG0748	0	0	0	GO:0016021	0	AT5G20270	haemolysin-III, putative, expressed; heptahelical transmembrane protein1	heptahelical transmembrane protein1	HlyIII, LrgA, Oxidored_q3	HlyIII, LrgA, Oxidored_q3
Gohir.D11G232300.1	NEC	EC	3.16239	4.37369e-10	8.44301e-09	PF03765,PF00650	KOG1471	0	0	0	0	0	AT1G72160	patellin protein, putative, expressed; Sec14p-like phosphatidylinositol transfer family protein	SEC14 cytosolic factor family protein / phosphoglyceride transfer family protein	CRAL_TRIO, CRAL_TRIO_N, IFT57	CRAL_TRIO, CRAL_TRIO_N, IFT57
Gohir.A12G125900.1	NEC	EC	3.16229	1.80632e-05	0.00012018	PF14009	0	0	0	0	0	0	NA	NA	0	DUF4228, RP1-2	DUF4228, RP1-2
Gohir.A11G090900.1	NEC	EC	3.1622	3.40963e-08	4.31824e-07	PF08030,PF01794,PF08022	KOG0039	1.16.1.7	0	0	GO:0016491,GO:0055114	0	AT1G01580	ferric-chelate reductase, putative, expressed; ferric reduction oxidase 2	ferric reduction oxidase 2	NAD_binding_6, FAD_binding_8, Ferric_reduct, NAD_binding_1, DUF3112, Abhydrolase_9_N	NAD_binding_6, FAD_binding_8, Ferric_reduct, NAD_binding_1, DUF3112, Abhydrolase_9_N
Gohir.D01G096600.1	NEC	EC	3.16139	5.0348e-07	4.91504e-06	PF13920	KOG1100	0	0	K19042	0	0	NA	NA	SBP (S-ribonuclease binding protein) family protein	zf-C3HC4_3, Prok-RING_4	zf-C3HC4_3, Prok-RING_4
Gohir.A09G169600.2	NEC	EC	3.16067	4.67366e-05	0.000280214	PF00520	KOG0498	0	0	K05391	GO:0005216,GO:0055085,GO:0016020,GO:0006811	0	AT3G48010	cyclic nucleotide-gated ion channel, putative, expressed; cyclic nucleotide-gated channel 16	cyclic nucleotide-gated channel 16	Ion_trans, cNMP_binding	Ion_trans, cNMP_binding
Gohir.D11G090701.1	NEC	EC	3.15954	1.457e-15	7.82952e-14	0	0	0	0	0	0	0	NA	NA	NA	#N/A	#N/A
Gohir.A04G134200.1	NEC	EC	3.15914	6.31028e-06	4.75034e-05	PF03126,PF02201	KOG1946	0	0	0	GO:0005515,GO:0003677	0	NA	NA	zinc ion binding;DNA binding	Plus-3, SWIB, zf-HC5HC2H, zf-HC5HC2H_2, GYF	Plus-3, SWIB, zf-HC5HC2H, zf-HC5HC2H_2, GYF
Gohir.A13G230933.1	NEC	EC	3.15557	6.77479e-06	5.06045e-05	PF00320	0	0	0	0	GO:0006355,GO:0003700,GO:0008270,GO:0043565	0	AT1G08010	GATA zinc finger domain containing protein, expressed; GATA transcription factor 11	GATA transcription factor 11	GATA	GATA
Gohir.D12G049700.1	NEC	EC	3.15531	2.9107e-06	2.36905e-05	PF00854	KOG1237	0	0	0	GO:0006810,GO:0005215,GO:0016020	0	AT1G69860	ligA, putative, expressed; Major facilitator superfamily protein	nitrate transporter 1.7	PTR2	PTR2
Gohir.D11G234600.1	NEC	EC	3.15355	3.07303e-06	2.48629e-05	0	0	0	0	0	0	0	AT5G17520	maltose excess protein 1-like, chloroplast precursor, putative, expressed; root cap 1 (RCP1)	root cap 1 (RCP1)	#N/A	#N/A
Gohir.A10G180200.1	NEC	EC	3.15285	0.00927322	0.0277255	PF00072	0	0	0	K14492	GO:0000160	0	AT3G56380	OsRR10 type-A response regulator, expressed; response regulator 17	response regulator 17	Response_reg, NACHT, P66_CC	Response_reg, NACHT, P66_CC
Gohir.A05G211500.1	NEC	EC	3.15227	0.250397	0.391087	PF06404	0	0	SignalP-noTM	0	GO:0008283,GO:0005576,GO:0008083	0	AT3G49780	phytosulfokines precursor, putative, expressed; phytosulfokine 4 precursor	phytosulfokine 4 precursor	PSK	PSK
Gohir.A07G060100.1	NEC	EC	3.15148	1.96169e-09	3.26107e-08	PF00005,PF01061	KOG0061	3.6.3.25	0	0	GO:0016020,GO:0016887,GO:0005524	0	AT1G17840	white-brown complex homolog protein 11, putative, expressed; white-brown complex homolog protein 11	white-brown complex homolog protein 11	ABC2_membrane, ABC_tran, AAA_21, AAA_29, SMC_N, RsgA_GTPase, AAA_16, AAA_23, AAA_25, AAA_22, AAA_18, Cytidylate_kin, AAA_5, AAA_33, NACHT, AAA_30	ABC2_membrane, ABC_tran, AAA_21, AAA_29, SMC_N, RsgA_GTPase, AAA_16, AAA_23, AAA_25, AAA_2
Gohir.A01G155800.1	NEC	EC	3.14917	6.91979e-05	0.000396665	PF03763	0	0	0	0	0	0	AT1G67590	remorin family protein, putative, expressed; Remorin family protein	Remorin family protein	Remorin_C	Remorin_C
Gohir.A01G004700.1	NEC	EC	3.14583	2.07972e-12	6.33985e-11	PF08541,PF08392	0	2.3.1.199	0	0	GO:0016747,GO:0006633,GO:0016020	0	AT1G19440	3-ketoacyl-CoA synthase, putative, expressed; 3-ketoacyl-CoA synthase 4	3-ketoacyl-CoA synthase 4	FAE1_CUT1_RppA, ACP_syn_III_C, Chal_sti_synt_C, ACP_syn_III, Chal_sti_synt_N	FAE1_CUT1_RppA, ACP_syn_III_C, Chal_sti_synt_C, ACP_syn_III, Chal_sti_synt_N
Gohir.A09G221400.1	NEC	EC	3.1434	1.58346e-10	3.36296e-09	PF08541,PF08392	0	2.3.1.199	0	0	GO:0006633,GO:0016747,GO:0016020	K15397	AT5G43760	3-ketoacyl-CoA synthase, putative, expressed; 3-ketoacyl-CoA synthase 20	3-ketoacyl-CoA synthase 2	FAE1_CUT1_RppA, ACP_syn_III_C, Chal_sti_synt_C, ACP_syn_III, Chal_sti_synt_N, DUF423	FAE1_CUT1_RppA, ACP_syn_III_C, Chal_sti_synt_C, ACP_syn_III, Chal_sti_synt_N, DUF423
Gohir.A11G121700.1	NEC	EC	3.1432	1.54979e-05	0.000104972	0	0	0	0	0	0	0	NA	NA	0	HLH	HLH
Gohir.A03G162400.1	NEC	EC	3.14229	7.89032e-09	1.15029e-07	PF03321	0	0	0	K14487	0	0	AT5G54510	OsGH3.1 - Probable indole-3-acetic acid-amido synthetase, expressed; Auxin-responsive GH3 family protein	Auxin-responsive GH3 family protein	GH3, Imm63, GNAT_acetyltr_2	GH3, Imm63, GNAT_acetyltr_2
Gohir.D06G020400.1	NEC	EC	3.14228	8.38888e-07	7.78951e-06	0	0	0	0	0	0	0	NA	NA	Glycosyl hydrolase family 35 protein	#N/A	#N/A
Gohir.A05G276500.1	NEC	EC	3.1419	3.14108e-08	4.0211e-07	PF00153	KOG0769	0	0	K13354	0	0	AT2G39970	mitochondrial carrier protein, putative, expressed; Mitochondrial substrate carrier family protein	Mitochondrial substrate carrier family protein	Mito_carr	Mito_carr
Gohir.A07G116400.1	NEC	EC	3.14086	1.26779e-06	1.12437e-05	PF00190	0	0	SignalP-noTM	0	GO:0045735	0	AT2G28490	cupin domain containing protein, expressed; RmlC-like cupins superfamily protein	RmlC-like cupins superfamily protein	Cupin_1, Cupin_2, TMEM51	Cupin_1, Cupin_2, TMEM51
Gohir.A06G170100.1	NEC	EC	3.14009	0.000218412	0.00109298	PF00855	0	2.7.11.1	0	0	0	0	NA	NA	ataxia-telangiectasia mutated	PWWP	PWWP
Gohir.D10G105600.1	NEC	EC	3.1394	5.53727e-05	0.00032553	0	0	0	0	0	0	0	AT3G18800	expressed protein	0	#N/A	#N/A
Gohir.A03G161200.1	NEC	EC	3.13925	2.99835e-13	1.08424e-11	PF00249	KOG0048	0	0	K09422	0	0	NA	NA	myb domain protein 15	Myb_DNA-binding, Myb_DNA-bind_6, SLIDE, Ser_hydrolase	Myb_DNA-binding, Myb_DNA-bind_6, SLIDE, Ser_hydrolase
Gohir.D11G347100.1	NEC	EC	3.13855	2.10736e-32	1.00402e-29	0	0	0	0	0	0	0	NA	NA	0	#N/A	#N/A
Gohir.D05G088400.1	NEC	EC	3.13831	0.0103275	0.0303629	PF00504	0	0	0	K08907	GO:0016020,GO:0009765	0	AT3G54890	chlorophyll A-B binding protein, putative, expressed; photosystem I light harvesting complex gene 1	photosystem I light harvesting complex gene 1	Chloroa_b-bind	Chloroa_b-bind
Gohir.D01G113900.1	NEC	EC	3.13778	4.6443e-10	8.89812e-09	PF00175,PF00258,PF00667	KOG1158	1.6.2.4	0	0	GO:0016491,GO:0010181,GO:0055114	0	AT4G24520	NADPH reductase, putative, expressed; P450 reductase 1	P450 reductase 1	FAD_binding_1, Flavodoxin_1, NAD_binding_1, Flavodoxin_5, Flavodoxin_NdrI	FAD_binding_1, Flavodoxin_1, NAD_binding_1, Flavodoxin_5, Flavodoxin_NdrI
Gohir.A09G247200.1	NEC	EC	3.13671	9.76091e-10	1.74571e-08	PF00403	KOG1603	0	0	0	GO:0046872,GO:0030001	0	NA	NA	Heavy metal transport/detoxification superfamily protein	HMA, HMw1_D2	HMA, HMw1_D2
Gohir.A11G267400.1	NEC	EC	3.13432	3.11215e-11	7.59773e-10	PF00403	KOG1603	0	0	0	GO:0046872,GO:0030001	0	AT1G56210	pro-resilin precursor, putative, expressed; Heavy metal transport/detoxification superfamily protein	Heavy metal transport/detoxification superfamily protein	HMA, DUF2034, Pab87_oct	HMA, DUF2034, Pab87_oct
Gohir.A05G318800.1	NEC	EC	3.13421	6.78583e-28	2.25612e-25	PF14009	0	0	0	0	0	0	AT1G60010	expressed protein	0	DUF4228, Ribos_L4_asso_C, DNApol_Exo	DUF4228, Ribos_L4_asso_C, DNApol_Exo
Gohir.D08G188400.1	NEC	EC	3.13333	2.32297e-10	4.73703e-09	PF13912	0	0	0	0	0	0	NA	NA	C2H2-like zinc finger protein	zf-C2H2_6, zf-C2H2_jaz, zf-C2H2_4, zf-C2H2, zf-C2H2_2, RIG-I_C-RD, zf-Di19, FYVE, zf-3CxxC_2, zf-H2C2_2, zf-C2HC_2	zf-C2H2_6, zf-C2H2_jaz, zf-C2H2_4, zf-C2H2, zf-C2H2_2, RIG-I_C-RD, zf-Di19, FYVE, zf-3CxxC
Gohir.D05G221750.1	NEC	EC	3.1314	2.51615e-07	2.63617e-06	0	0	0	0	0	0	0	NA	NA	Tetratricopeptide repeat (TPR)-like superfamily protein	#N/A	#N/A
Gohir.D10G247600.1	NEC	EC	3.12988	0.00134926	0.00538052	PF00067	KOG0157	0	0	K09588	GO:0020037,GO:0016705,GO:0055114,GO:0005506	0	AT5G05690	cytochrome P450, putative, expressed; Cytochrome P450 superfamily protein	Cytochrome P450 superfamily protein	p450	p450
Gohir.A06G136802.1	NEC	EC	3.12882	3.77665e-11	9.06201e-10	PF00109,PF02801	KOG1394	2.3.1.41	0	K09458	0	0	AT5G46290	3-oxoacyl-synthase, putative, expressed; 3-ketoacyl-acyl carrier protein synthase I	3-ketoacyl-acyl carrier protein synthase I	ketoacyl-synt, Ketoacyl-synt_C, Thiolase_N, Thiolase_C	ketoacyl-synt, Ketoacyl-synt_C, Thiolase_N, Thiolase_C
Gohir.A13G065500.1	NEC	EC	3.12802	2.7794e-12	8.29762e-11	PF02365	0	0	0	0	GO:0006355,GO:0003677	0	AT5G64530	no apical meristem protein, putative, expressed; xylem NAC domain 1	xylem NAC domain 1	NAM	NAM
Gohir.A10G014200.1	NEC	EC	3.12765	1.45593e-07	1.60737e-06	PF00067	KOG0156	0	0	K00517	GO:0005506,GO:0016705,GO:0020037,GO:0055114	0	AT1G11600	cytochrome P450, putative, expressed; cytochrome P450, family 77, subfamily B, polypeptide 1	cytochrome P450, family 77, subfamily B, polypeptide 1	p450, TIMP	p450, TIMP
Gohir.D08G100200.1	NEC	EC	3.1263	6.18353e-07	5.90669e-06	PF03016	KOG1021	2.4.2.41	SignalP-noTM	K18789	GO:0006486,GO:0016757	0	AT5G33290	exostosin family protein, putative, expressed; xylogalacturonan deficient 1	Exostosin family protein	Exostosin, Prp18, MotB_plug	Exostosin, Prp18, MotB_plug
Gohir.D13G090600.1	NEC	EC	3.12516	0.137561	0.247943	PF05680	0	0	0	0	GO:0015986,GO:0000276,GO:0015078	0	AT3G01130	expressed protein	0	ATP-synt_E	ATP-synt_E
Gohir.A03G092980.1	NEC	EC	3.12476	0.000261999	0.00128129	0	0	0	0	0	0	0	AT3G17920	leucine-rich repeat family protein, putative, expressed; Outer arm dynein light chain 1 protein	Outer arm dynein light chain 1 protein	LRR_6, LRR_9, LRR_1, LRR_8, LRR_4	LRR_6, LRR_9, LRR_1, LRR_8, LRR_4
Gohir.D02G169600.1	NEC	EC	3.12457	1.13943e-09	1.99687e-08	PF08541,PF08392	0	2.3.1.199	0	0	GO:0016747,GO:0006633,GO:0016020	K15397	AT1G68530	3-ketoacyl-CoA synthase, putative, expressed; 3-ketoacyl-CoA synthase 6	3-ketoacyl-CoA synthase 6	FAE1_CUT1_RppA, ACP_syn_III_C, Chal_sti_synt_C, Chal_sti_synt_N, ACP_syn_III	FAE1_CUT1_RppA, ACP_syn_III_C, Chal_sti_synt_C, Chal_sti_synt_N, ACP_syn_III
Gohir.D02G113100.1	NEC	EC	3.1235	4.9968e-09	7.62372e-08	PF16845	0	0	SignalP-noTM	K13899	GO:0004869	0	NA	NA	PHYTOCYSTATIN 2	SQAPI, Cystatin	SQAPI, Cystatin
Gohir.A04G136300.1	NEC	EC	3.12222	2.36917e-12	7.1721e-11	PF04864	0	2.6.1.99	0	0	GO:0016846	0	AT1G70560	alliin lyase precursor, putative, expressed; tryptophan aminotransferase of Arabidopsis 1	tryptophan aminotransferase of Arabidopsis 1	Alliinase_C, Aminotran_1_2	Alliinase_C, Aminotran_1_2
Gohir.D10G145301.1	NEC	EC	3.12162	0.059873	0.128831	0	0	0	0	0	0	0	NA	NA	NA	#N/A	#N/A
Gohir.D01G069600.1	NEC	EC	3.1216	5.63772e-07	5.43134e-06	PF04577	KOG4698	2.4.1.255	0	K18134	GO:0016757	0	NA	NA	Glycosyltransferase family 61 protein	DUF563	DUF563
Gohir.D03G016600.1	NEC	EC	3.12113	0.000787906	0.00335876	PF00201	KOG1192	0	0	K12356	GO:0008152,GO:0016758	0	AT3G50740	UDP-glucoronosyl/UDP-glucosyl transferase, putative, expressed; UDP-glucosyl transferase 72E1	UDP-glucosyl transferase 72E1	UDPGT, Cerato-platanin, Glyco_tran_28_C	UDPGT, Cerato-platanin, Glyco_tran_28_C
Gohir.D04G179300.1	NEC	EC	3.12059	8.99939e-05	0.000501565	PF04864	0	2.6.1.99	0	0	GO:0016846	0	AT1G70560	alliin lyase precursor, putative, expressed; tryptophan aminotransferase of Arabidopsis 1	tryptophan aminotransferase of Arabidopsis 1	Alliinase_C, Aminotran_1_2	Alliinase_C, Aminotran_1_2
Gohir.D05G082600.1	NEC	EC	3.11896	4.72991e-12	1.35349e-10	PF01190	0	0	SignalP-noTM	0	0	0	AT2G27385	POEI29 - Pollen Ole e I allergen and extensin family protein precursor, putative, expressed; Pollen Ole e 1 allergen and extensin family protein	Pollen Ole e 1 allergen and extensin family protein	Pollen_Ole_e_I, Big_6	Pollen_Ole_e_I, Big_6
Gohir.D04G004900.1	NEC	EC	3.11823	1.00602e-10	2.21813e-09	0	0	0	0	0	0	0	AT4G23440	AP003256-AK101847 - NBS/LRR genes that are S-rich,divergent TIR, divergent NBS, expressed; Disease resistance protein (TIR-NBS class)	Disease resistance protein (TIR-NBS class)	TIR_2, AAA_22, AAA_16, Hpr_kinase_C, TIR	TIR_2, AAA_22, AAA_16, Hpr_kinase_C, TIR
Gohir.A07G192600.1	NEC	EC	3.11735	0.0312355	0.0758347	0	0	0	0	0	0	0	NA	NA	0	DUF1122	DUF1122
Gohir.A11G107300.1	NEC	EC	3.11706	1.23476e-05	8.60425e-05	PF00657	0	3.2.1.51	0	0	GO:0016788	0	AT1G09390	GDSL-like lipase/acylhydrolase, putative, expressed; GDSL-like Lipase/Acylhydrolase superfamily protein	GDSL-like Lipase/Acylhydrolase superfamily protein	Lipase_GDSL	Lipase_GDSL
Gohir.A08G039900.1	NEC	EC	3.11631	1.20486e-07	1.35675e-06	PF15699	0	0	0	0	GO:0010112	0	NA	NA	systemic acquired resistance (SAR) regulator protein NIMIN-1-related	NPR1_interact, FAM76	NPR1_interact, FAM76
Gohir.D10G116300.1	NEC	EC	3.11558	5.46727e-06	4.16663e-05	PF00234	0	0	SignalP-noTM	0	0	0	AT5G59320	LTPL8 - Protease inhibitor/seed storage/LTP family protein precursor, expressed; lipid transfer protein 3	lipid transfer protein 3	Tryp_alpha_amyl, LTP_2	Tryp_alpha_amyl, LTP_2
Gohir.D02G178800.1	NEC	EC	3.11498	1.87439e-06	1.60445e-05	PF02298	0	0	SignalP-noTM	0	GO:0009055	0	AT4G32490	plastocyanin-like domain containing protein, putative, expressed; early nodulin-like protein 4	early nodulin-like protein 3	Cu_bind_like	Cu_bind_like
Gohir.D04G072300.1	NEC	EC	3.11441	5.46712e-11	1.269e-09	PF04116,PF12076	0	0	0	0	GO:0005506,GO:0016491,GO:0008610,GO:0055114	0	AT1G02205	WAX2, putative, expressed; Fatty acid hydroxylase superfamily	Fatty acid hydroxylase superfamily	Wax2_C, FA_hydroxylase	Wax2_C, FA_hydroxylase
Gohir.D13G195400.1	NEC	EC	3.11361	1.3944e-15	7.52815e-14	PF08392,PF08541	0	2.3.1.199	0	0	GO:0016020,GO:0016747,GO:0006633	K15397	AT2G26250	3-ketoacyl-CoA synthase 10, putative, expressed; 3-ketoacyl-CoA synthase 10	3-ketoacyl-CoA synthase 10	FAE1_CUT1_RppA, ACP_syn_III_C, Chal_sti_synt_C, ACP_syn_III, Chal_sti_synt_N	FAE1_CUT1_RppA, ACP_syn_III_C, Chal_sti_synt_C, ACP_syn_III, Chal_sti_synt_N
Gohir.D01G129300.1	NEC	EC	3.11293	6.23495e-08	7.45517e-07	PF03479	0	0	0	0	0	0	AT4G12080	AT hook motif domain containing protein, expressed; AT-hook motif nuclear-localized protein 1	AT-hook motif nuclear-localized protein 1	DUF296, AT_hook	DUF296, AT_hook
Gohir.A13G188400.1	NEC	EC	3.11239	1.5732e-15	8.42455e-14	PF08392,PF08541	0	2.3.1.199	0	0	GO:0016747,GO:0006633,GO:0016020	K15397	AT2G26250	3-ketoacyl-CoA synthase 10, putative, expressed; 3-ketoacyl-CoA synthase 10	3-ketoacyl-CoA synthase 10	FAE1_CUT1_RppA, ACP_syn_III_C, Chal_sti_synt_C, ACP_syn_III, Chal_sti_synt_N	FAE1_CUT1_RppA, ACP_syn_III_C, Chal_sti_synt_C, ACP_syn_III, Chal_sti_synt_N
Gohir.D02G099801.1	NEC	EC	3.11227	0.00239682	0.00883659	PF00293	0	5.3.3.2	0	0	GO:0016787	0	AT1G79690	hydrolase, NUDIX family, domain containing protein, expressed; nudix hydrolase homolog 3	nudix hydrolase homolog 3	NUDIX	NUDIX
Gohir.A06G110802.1	NEC	EC	3.11156	2.03072e-13	7.54744e-12	PF00657	0	3.1.1.49	SignalP-noTM	0	GO:0016788	0	AT5G45910	GDSL-like lipase/acylhydrolase, putative, expressed; GDSL-like Lipase/Acylhydrolase superfamily protein	GDSL-like Lipase/Acylhydrolase superfamily protein	Lipase_GDSL, Lipase_GDSL_2, YpsA	Lipase_GDSL, Lipase_GDSL_2, YpsA
Gohir.D02G189500.1	NEC	EC	3.11146	3.53463e-07	3.58852e-06	PF05705	KOG2521	0	0	0	0	0	AT3G19970	expressed protein; alpha/beta-Hydrolases superfamily protein	alpha/beta-Hydrolases superfamily protein	DUF829	DUF829
Gohir.D03G169433.1	NEC	EC	3.11139	0.000433314	0.00199196	PF04043	0	0	SignalP-noTM	0	GO:0004857	0	AT5G46970	invertase/pectin methylesterase inhibitor family protein, putative, expressed; Plant invertase/pectin methylesterase inhibitor superfamily protein	Plant invertase/pectin methylesterase inhibitor superfamily protein	PMEI	PMEI
Gohir.D01G080400.1	NEC	EC	3.11125	6.6368e-16	3.80538e-14	PF13639	0	0	0	0	0	0	NA	NA	RING/U-box superfamily protein	zf-RING_2, zf-C3HC4, zf-rbx1, zf-RING_11, zf-C3HC4_2, zf-RING_5, FANCL_C, zf-RING_UBOX, Prok-RING_4, zf-C3HC4_3, RINGv, zf-ANAPC11, Zn_ribbon_17, Rad50_zn_hook, zf-RING_4, Baculo_RING, zf-RING-like	zf-RING_2, zf-C3HC4, zf-rbx1, zf-RING_11, zf-C3HC4_2, zf-RING_5, FANCL_C, zf-RING_UBOX, Pr
Gohir.D01G153700.1	NEC	EC	3.10955	1.55073e-09	2.63394e-08	0	0	3.1.1.49	0	0	0	0	NA	NA	NA	#N/A	#N/A
Gohir.A10G176400.1	NEC	EC	3.10914	9.34264e-21	1.13323e-18	PF10436,PF02518	KOG0787	2.7.11.2	0	K00898	0	0	AT3G06483	kinase, putative, expressed; pyruvate dehydrogenase kinase	pyruvate dehydrogenase kinase	BCDHK_Adom3, HATPase_c, HATPase_c_3, DUF677	BCDHK_Adom3, HATPase_c, HATPase_c_3, DUF677
Gohir.A09G094000.1	NEC	EC	3.10895	7.92059e-26	2.03357e-23	PF04525	0	0	0	0	0	0	AT2G38640	DUF567 domain containing protein, putative, expressed; Protein of unknown function (DUF567)	Protein of unknown function (DUF567)	LOR	LOR
Gohir.D12G223500.1	NEC	EC	3.10822	7.77867e-18	6.17669e-16	0	0	0	0	0	0	0	AT1G12330	expressed protein	0	Dor1, DUF489, CENP-H	Dor1, DUF489, CENP-H
Gohir.A01G000301.1	NEC	EC	3.1075	9.82397e-11	2.17123e-09	PF03062	0	2.3.1.23	0	0	0	0	AT1G12640	O-acyltransferase, putative, expressed; MBOAT (membrane bound O-acyl transferase) family protein	MBOAT (membrane bound O-acyl transferase) family protein	MBOAT	MBOAT
Gohir.D11G205900.1	NEC	EC	3.1075	1.19276e-08	1.6724e-07	PF10714	0	0	0	0	0	0	NA	NA	Late embryogenesis abundant protein, group 6	LEA_6	LEA_6
Gohir.D03G165600.1	NEC	EC	3.10663	3.53483e-11	8.53941e-10	PF00249	0	0	0	0	0	0	AT5G47390	MYB family transcription factor, putative, expressed; myb-like transcription factor family protein	myb-like transcription factor family protein	Myb_DNA-binding	Myb_DNA-binding
Gohir.A03G146400.1	NEC	EC	3.10633	1.22591e-08	1.71575e-07	PF08541,PF08392	0	2.3.1.199	0	0	GO:0016747,GO:0006633,GO:0016020	K15397	AT1G68530	3-ketoacyl-CoA synthase, putative, expressed; 3-ketoacyl-CoA synthase 6	3-ketoacyl-CoA synthase 6	FAE1_CUT1_RppA, ACP_syn_III_C, Chal_sti_synt_C, Chal_sti_synt_N, ACP_syn_III	FAE1_CUT1_RppA, ACP_syn_III_C, Chal_sti_synt_C, Chal_sti_synt_N, ACP_syn_III
Gohir.A01G137617.1	NEC	EC	3.10591	1.38003e-17	1.04723e-15	PF11960,PF00487	0	1.14.19.6	0	0	GO:0055114,GO:0006629,GO:0016717	0	AT3G12120	fatty acid desaturase, putative, expressed; fatty acid desaturase 2	fatty acid desaturase 2	FA_desaturase, DUF3474	FA_desaturase, DUF3474
Gohir.A10G124901.1	NEC	EC	3.10514	4.60947e-06	3.56641e-05	PF01388,PF00505	KOG0381	0	0	0	GO:0003677	0	AT1G04880	high mobility group, putative, expressed; HMG (high mobility group) box protein with ARID/BRIGHT DNA-binding domain	HMG (high mobility group) box protein with ARID/BRIGHT DNA-binding domain	ARID, HMG_box, HMG_box_2, HMG_box_5	ARID, HMG_box, HMG_box_2, HMG_box_5
Gohir.A01G004600.1	NEC	EC	3.1037	9.10986e-17	6.00575e-15	PF08541,PF08392	0	2.3.1.199	0	0	GO:0016020,GO:0006633,GO:0016747	0	AT2G16280	3-ketoacyl-CoA synthase, putative, expressed; 3-ketoacyl-CoA synthase 9	3-ketoacyl-CoA synthase 9	FAE1_CUT1_RppA, ACP_syn_III_C, Chal_sti_synt_C, ACP_syn_III, Chal_sti_synt_N	FAE1_CUT1_RppA, ACP_syn_III_C, Chal_sti_synt_C, ACP_syn_III, Chal_sti_synt_N
Gohir.A07G121800.1	NEC	EC	3.10332	0.00557956	0.0180836	PF14368	0	0	0	0	0	0	AT4G30880	LTPL35 - Protease inhibitor/seed storage/LTP family protein precursor, putative; Bifunctional inhibitor/lipid-transfer protein/seed storage 2S albumin superfamily protein	Bifunctional inhibitor/lipid-transfer protein/seed storage 2S albumin superfamily protein	LTP_2, Tryp_alpha_amyl, Hydrophob_seed	LTP_2, Tryp_alpha_amyl, Hydrophob_seed
Gohir.A12G219200.1	NEC	EC	3.10229	0.000325065	0.00154299	0	0	0	0	0	0	0	AT1G62520	zinc finger family protein, putative, expressed	0	#N/A	#N/A
Gohir.D05G137600.1	NEC	EC	3.1019	8.4192e-13	2.75166e-11	PF00732,PF05199	KOG1238	0	SignalP-noTM	0	GO:0050660,GO:0055114,GO:0016614	K15403	AT1G72970	HOTHEAD precursor, putative, expressed; Glucose-methanol-choline (GMC) oxidoreductase family protein	Glucose-methanol-choline (GMC) oxidoreductase family protein	GMC_oxred_N, GMC_oxred_C, NAD_binding_8, DAO, FAD_binding_2, Lycopene_cycl, Pyr_redox_2, RNase_J_C	GMC_oxred_N, GMC_oxred_C, NAD_binding_8, DAO, FAD_binding_2, Lycopene_cycl, Pyr_redox_2, R
Gohir.D01G217300.1	NEC	EC	3.10132	4.32702e-12	1.24669e-10	PF01699	KOG1397	0	0	K07300	GO:0016021,GO:0055085	0	AT3G51860	sodium/calcium exchanger protein, putative, expressed; cation exchanger 3	cation exchanger 3	Na_Ca_ex	Na_Ca_ex
Gohir.A09G029100.1	NEC	EC	3.10089	0.00864092	0.0261418	0	0	0	0	0	0	0	AT5G40460	expressed protein	0	#N/A	#N/A
Gohir.D01G190900.1	NEC	EC	3.10055	0.000156545	0.000813785	PF02701	0	0	0	0	GO:0003677,GO:0006355	0	AT3G52440	dof zinc finger domain containing protein, putative, expressed; Dof-type zinc finger DNA-binding family protein	Dof-type zinc finger DNA-binding family protein	zf-Dof, Zn_Tnp_IS1595, OrfB_Zn_ribbon	zf-Dof, Zn_Tnp_IS1595, OrfB_Zn_ribbon
Gohir.A06G196900.1	NEC	EC	3.10024	3.81542e-10	7.46826e-09	PF14226,PF03171	KOG0143	1.14.11.13	0	0	GO:0016491,GO:0055114	0	AT1G30040	gibberellin 2-beta-dioxygenase, putative, expressed; gibberellin 2-oxidase	gibberellin 2-oxidase	2OG-FeII_Oxy, DIOX_N	2OG-FeII_Oxy, DIOX_N
Gohir.D04G148666.1	NEC	EC	3.10004	4.08099e-07	4.07958e-06	0	0	0	0	0	0	0	NA	NA	0	#N/A	#N/A
Gohir.D13G102000.1	NEC	EC	3.09896	3.99561e-05	0.000243638	PF01554	KOG1347	0	0	0	GO:0015297,GO:0016020,GO:0055085,GO:0006855,GO:0015238	0	AT1G33110	MATE efflux family protein, putative, expressed; MATE efflux family protein	MATE efflux family protein	MatE, Polysacc_synt_C, PEN-2	MatE, Polysacc_synt_C, PEN-2
Gohir.A02G156900.2	NEC	EC	3.09894	5.12719e-13	1.75908e-11	0	KOG3366	0	0	0	0	0	AT3G52300	expressed protein; ATP synthase D chain, mitochondrial	0	Mt_ATP-synt_D, CHD5, Band_7	Mt_ATP-synt_D, CHD5, Band_7
Gohir.A10G235200.1	NEC	EC	3.09873	0.00796656	0.024411	PF00067	KOG0157	0	0	K09588	GO:0055114,GO:0005506,GO:0016705,GO:0020037	0	AT5G05690	cytochrome P450, putative, expressed; Cytochrome P450 superfamily protein	Cytochrome P450 superfamily protein	p450	p450
Gohir.A13G058900.1	NEC	EC	3.09745	6.78823e-06	5.06803e-05	PF00249	KOG0048	0	0	0	0	0	AT2G31180	MYB family transcription factor, putative, expressed; myb domain protein 14	myb domain protein 14	Myb_DNA-binding, Myb_DNA-bind_6, SLIDE, Myb_DNA-bind_7	Myb_DNA-binding, Myb_DNA-bind_6, SLIDE, Myb_DNA-bind_7
Gohir.D02G142800.1	NEC	EC	3.09615	1.06344e-05	7.53076e-05	PF00759	0	3.2.1.4	SignalP-TM	0	GO:0005975,GO:0004553	0	AT1G70710	endoglucanase, putative, expressed; glycosyl hydrolase 9B1	glycosyl hydrolase 9B1	Glyco_hydro_9, US2	Glyco_hydro_9, US2
Gohir.A09G041900.1	NEC	EC	3.09609	0.022843	0.0585959	PF00403	KOG1603	0	0	0	GO:0046872,GO:0030001	0	AT5G23760	heavy-metal-associated domain-containing protein, putative, expressed; Copper transport protein family	Copper transport protein family	HMA, Staphopain_pro, Syja_N, Cytomega_UL84, U1snRNP70_N, Peptidase_S49_N	HMA, Staphopain_pro, Syja_N, Cytomega_UL84, U1snRNP70_N, Peptidase_S49_N
Gohir.D10G066000.1	NEC	EC	3.09601	2.91912e-09	4.69395e-08	PF00657	0	3.1.1.3	SignalP-noTM	0	GO:0016788	0	AT3G16370	GDSL-like lipase/acylhydrolase, putative, expressed; GDSL-like Lipase/Acylhydrolase superfamily protein	GDSL-like Lipase/Acylhydrolase superfamily protein	Lipase_GDSL, DUF4404	Lipase_GDSL, DUF4404
Gohir.D05G139266.1	NEC	EC	3.09568	2.38165e-06	1.98746e-05	PF13637,PF13962	0	2.7.11.1	0	0	0	0	AT3G13950	cadmium tolerance factor, putative, expressed	NA	PGG, Ank_2, Ank_4, Ank, Ank_3, Ank_5, Synaptobrevin	PGG, Ank_2, Ank_4, Ank, Ank_3, Ank_5, Synaptobrevin
Gohir.D03G110900.1	NEC	EC	3.0938	1.40865e-13	5.39306e-12	PF00106	KOG1208	1.1.1.208	0	0	0	0	AT5G51030	oxidoreductase, short chain dehydrogenase/reductase family domain containing protein, expressed; NAD(P)-binding Rossmann-fold superfamily protein	NAD(P)-binding Rossmann-fold superfamily protein	adh_short, adh_short_C2, KR, Epimerase, CDPS, NAD_binding_10	adh_short, adh_short_C2, KR, Epimerase, CDPS, NAD_binding_10
Gohir.A13G114000.1	NEC	EC	3.09364	7.19049e-06	5.33389e-05	PF03283	KOG4287	0	SignalP-noTM	0	GO:0016787	0	AT3G05910	pectinacetylesterase domain containing protein, expressed; Pectinacetylesterase family protein	Pectinacetylesterase family protein	PAE	PAE
Gohir.A09G181700.1	NEC	EC	3.09356	1.07281e-10	2.35529e-09	0	0	0	0	0	0	0	AT5G52430	expressed protein; hydroxyproline-rich glycoprotein family protein	hydroxyproline-rich glycoprotein family protein	Auts2	Auts2
Gohir.D07G152800.1	NEC	EC	3.09326	3.07215e-08	3.94927e-07	PF04640	0	0	0	0	0	0	AT3G60670	zinc-binding protein, putative, expressed; PLATZ transcription factor family protein	PLATZ transcription factor family protein	PLATZ, zf-B_box	PLATZ, zf-B_box
Gohir.D12G219400.1	NEC	EC	3.09119	2.52274e-09	4.10455e-08	PF13912	0	0	0	0	0	0	NA	NA	C2H2-like zinc finger protein	zf-C2H2_6, zf-C2H2_jaz, zf-C2H2_4, zf-met, zf-C2H2_2, zf-C2H2, zf-3CxxC_2, Zn-C2H2_12, zf-H2C2_2, zf-C2H2_8, FYVE	zf-C2H2_6, zf-C2H2_jaz, zf-C2H2_4, zf-met, zf-C2H2_2, zf-C2H2, zf-3CxxC_2, Zn-C2H2_12, zf-
Gohir.A01G180500.1	NEC	EC	3.08989	0.000635934	0.00279151	0	0	0	0	0	0	0	NA	NA	0	DUF4598, CDC45	DUF4598, CDC45
Gohir.D01G004500.1	NEC	EC	3.08654	2.42529e-13	8.86726e-12	PF08541,PF08392	0	2.3.1.199	0	0	GO:0006633,GO:0016747,GO:0016020	0	AT2G16280	3-ketoacyl-CoA synthase, putative, expressed; 3-ketoacyl-CoA synthase 9	3-ketoacyl-CoA synthase 9	FAE1_CUT1_RppA, ACP_syn_III_C, Chal_sti_synt_C, ACP_syn_III	FAE1_CUT1_RppA, ACP_syn_III_C, Chal_sti_synt_C, ACP_syn_III
Gohir.A06G163300.1	NEC	EC	3.08349	1.95764e-06	1.66705e-05	PF00069	KOG1187	2.7.11.1	SignalP-TM	0	GO:0005524,GO:0006468,GO:0004672	0	AT3G55950	TKL_IRAK_CR4L.4 - The CR4L subfamily has homology with Crinkly4, expressed; CRINKLY4 related 3	CRINKLY4 related 3	Pkinase, Pkinase_Tyr, RCC1_2, PIP49_C, ABC1, APH	Pkinase, Pkinase_Tyr, RCC1_2, PIP49_C, ABC1, APH
Gohir.D09G109300.1	NEC	EC	3.08324	0.000438162	0.00201145	PF00005,PF01061	KOG0061	3.6.3.44	0	0	GO:0005524,GO:0016020,GO:0016887	0	AT1G51460	white-brown complex homolog protein 12, putative, expressed; ABC-2 type transporter family protein	ABC-2 type transporter family protein	ABC2_membrane, ABC_tran, AAA_29, AAA_21, SMC_N, AAA_16, RsgA_GTPase, AAA_23, Cytidylate_kin, AAA_22, AAA_33, AAA_18, AAA_5, AAA_25, Rad17, AAA_17, MMR_HSR1, AAA_28, NACHT, ABC_ATPase, AAA_30	ABC2_membrane, ABC_tran, AAA_29, AAA_21, SMC_N, AAA_16, RsgA_GTPase, AAA_23, Cytidylate_ki
Gohir.A05G234900.1	NEC	EC	3.08138	1.03097e-06	9.34401e-06	PF00501	KOG1180	6.2.1.3	0	0	GO:0003824,GO:0008152	0	AT1G77590	acyl-CoA synthetase protein, putative, expressed; long chain acyl-CoA synthetase 9	long chain acyl-CoA synthetase 9	AMP-binding, AMP-binding_C, CcmD	AMP-binding, AMP-binding_C, CcmD
Gohir.D02G023600.1	NEC	EC	3.0799	5.14533e-14	2.11742e-12	0	0	0	0	0	0	0	NA	NA	0	MBD	MBD
Gohir.D10G024000.1	NEC	EC	3.07867	1.0853e-09	1.91216e-08	PF16499	KOG2366	3.2.1.22	0	K07407	GO:0004553,GO:0005975	0	AT5G08370	alpha-galactosidase precursor, putative, expressed; alpha-galactosidase 2	alpha-galactosidase 2	Melibiase_2, Melibiase_C, Melibiase, Melibiase_2_C, Glyco_hydro_97, DsbD, Raffinose_syn	Melibiase_2, Melibiase_C, Melibiase, Melibiase_2_C, Glyco_hydro_97, DsbD, Raffinose_syn
Gohir.A08G150600.1	NEC	EC	3.07812	0.00821943	0.0250728	PF00179	KOG0424	6.3.2.19	0	K10577	GO:0019789	0	AT3G57870	ubiquitin-conjugating enzyme, putative, expressed; sumo conjugation enzyme 1	sumo conjugation enzyme 1	UQ_con, Prok-E2_B	UQ_con, Prok-E2_B
Gohir.D06G112600.2	NEC	EC	3.0748	6.64508e-05	0.000382397	PF08372,PF00168	0	0	0	0	0	0	AT5G12970	anthranilate phosphoribosyltransferase, putative, expressed; Calcium-dependent lipid-binding (CaLB domain) plant phosphoribosyltransferase family protein	Calcium-dependent lipid-binding (CaLB domain) plant phosphoribosyltransferase family protein	PRT_C, C2, Pex24p, DUF3292, DUF639, Reticulon	PRT_C, C2, Pex24p, DUF3292, DUF639, Reticulon
Gohir.D06G076050.1	NEC	EC	3.07373	0.000125422	0.000670396	0	0	0	0	0	0	0	NA	NA	0	zf-NPL4	zf-NPL4
Gohir.A09G218800.1	NEC	EC	3.0737	0.000704776	0.00304597	PF17181	0	0	SignalP-noTM	0	0	0	AT4G14723	expressed protein	0	EPF, DAP10	EPF, DAP10
Gohir.D08G162600.1	NEC	EC	3.06933	2.31539e-10	4.72629e-09	PF01486,PF00319	KOG0014	0	0	0	GO:0006355,GO:0003700,GO:0046983,GO:0003677,GO:0005634	0	AT5G13790	OsMADS27 - MADS-box family gene with MIKCc type-box, expressed; AGAMOUS-like 15	AGAMOUS-like 15	SRF-TF, K-box	SRF-TF, K-box
Gohir.A09G137100.1	NEC	EC	3.0693	0.00914446	0.0274132	0	0	0	0	0	0	0	AT5G06270	expressed protein	0	zf-ribbon_3, DUF2367, PhnA_Zn_Ribbon, Zn_Tnp_IS1	zf-ribbon_3, DUF2367, PhnA_Zn_Ribbon, Zn_Tnp_IS1
Gohir.A01G180000.1	NEC	EC	3.06725	5.88457e-10	1.10594e-08	PF01063	KOG0975	2.6.1.42	0	K00826	GO:0008152,GO:0003824	0	AT1G50090	aminotransferase domain containing protein, putative, expressed; D-aminoacid aminotransferase-like PLP-dependent enzymes superfamily protein	D-aminoacid aminotransferase-like PLP-dependent enzymes superfamily protein	Aminotran_4	Aminotran_4
Gohir.D11G083700.1	NEC	EC	3.06639	6.93656e-05	0.000397429	PF15054	0	0	SignalP-noTM	0	0	0	AT2G35736	expressed protein	0	DUF4535, Soyouz_module	DUF4535, Soyouz_module
Gohir.D01G176925.1	NEC	EC	3.06501	3.83892e-06	3.02699e-05	PF14310,PF00933,PF01915	0	3.2.1.55	SignalP-noTM	0	GO:0005975,GO:0004553	0	AT1G78060	glycosyl hydrolase family 3 protein, putative, expressed; Glycosyl hydrolase family protein	Glycosyl hydrolase family protein	Glyco_hydro_3_C, Glyco_hydro_3, Fn3-like	Glyco_hydro_3_C, Glyco_hydro_3, Fn3-like
Gohir.A01G068500.3	NEC	EC	3.06413	3.53969e-10	6.96989e-09	PF02362	0	0	0	0	GO:0003677	0	NA	NA	high-level expression of sugar-inducible gene 2	B3, DUF4011, DUF313, DUF3665, Med3	B3, DUF4011, DUF313, DUF3665, Med3
Gohir.A01G172300.1	NEC	EC	3.06284	0.000567171	0.00252258	PF01490	KOG1303	0	0	0	0	0	AT4G35180	transmembrane amino acid transporter protein, putative, expressed; LYS/HIS transporter 7	LYS/HIS transporter 7	Aa_trans, ATP-synt_8, DUF1129	Aa_trans, ATP-synt_8, DUF1129
Gohir.A11G261100.1	NEC	EC	3.06167	1.03046e-17	8.00366e-16	PF07714	KOG1187	2.7.11.1	0	0	GO:0006468,GO:0004672	0	AT3G05140	protein kinase domain containing protein, expressed; ROP binding protein kinases 2	ROP binding protein kinases 2	Pkinase_Tyr, Pkinase, APH, Pkinase_fungal	Pkinase_Tyr, Pkinase, APH, Pkinase_fungal
Gohir.D12G119900.2	NEC	EC	3.06153	1.0133e-21	1.43207e-19	0	0	0	0	0	0	0	NA	NA	0	Poty_PP	Poty_PP
Gohir.D11G230780.1	NEC	EC	3.05992	0.00748169	0.0231587	0	0	0	0	0	0	0	AT1G30300	phosphonate metabolism protein-related, putative, expressed; Metallo-hydrolase/oxidoreductase superfamily protein	Metallo-hydrolase/oxidoreductase superfamily protein	Lactamase_B_2	Lactamase_B_2
Gohir.A08G247900.1	NEC	EC	3.05967	1.06506e-05	7.54059e-05	PF00612,PF13178	0	0	0	0	GO:0005515	0	AT2G26180	IQ calmodulin-binding motif domain containing protein, expressed; IQ-domain 6	IQ-domain 6	IQ, DUF4005	IQ, DUF4005
Gohir.A10G112551.1	NEC	EC	3.05935	0.0463998	0.104923	0	0	3.5.3.9	0	0	0	0	AT4G20070	hydrolase, putative, expressed; allantoate amidohydrolase	allantoate amidohydrolase	#N/A	#N/A
Gohir.D11G071400.1	NEC	EC	3.05917	3.29956e-20	3.70112e-18	PF07714	KOG0192	2.7.12.1	0	0	GO:0004672,GO:0006468	0	AT3G01490	protein kinase domain containing protein, expressed; Protein kinase superfamily protein	Protein kinase superfamily protein	Pkinase_Tyr, Pkinase, Pkinase_fungal, Kinase-like, Haspin_kinase, APH	Pkinase_Tyr, Pkinase, Pkinase_fungal, Kinase-like, Haspin_kinase, APH
Gohir.A08G048000.1	NEC	EC	3.05848	4.58521e-06	3.55003e-05	PF01758	KOG2718	0	0	0	GO:0016020	0	AT3G25410	bile acid sodium symporter family protein, putative, expressed; Sodium Bile acid symporter family	Sodium Bile acid symporter family	SBF, HKR_ArcB_TM, ATPase_gene1	SBF, HKR_ArcB_TM, ATPase_gene1
Gohir.D11G007000.1	NEC	EC	3.05594	1.59043e-12	4.94616e-11	PF07279	0	0	0	0	0	0	AT5G62280	expressed protein; Protein of unknown function (DUF1442)	Protein of unknown function (DUF1442)	DUF1442	DUF1442
Gohir.A01G005400.1	NEC	EC	3.05285	0.0011693	0.00474724	PF02362	0	0	0	0	GO:0003677	0	NA	NA	0	B3	B3
Gohir.D12G152100.2	NEC	EC	3.0527	1.34744e-06	1.18792e-05	PF10358	0	0	0	0	0	0	NA	NA	0	NT-C2, Rbx_binding, KLRAQ	NT-C2, Rbx_binding, KLRAQ
Gohir.A09G227400.1	NEC	EC	3.05187	1.60126e-07	1.75481e-06	PF01657	0	0	SignalP-noTM	0	0	0	AT1G04520	cysteine-rich repeat secretory protein precursor, putative, expressed; plasmodesmata-located protein 2	plasmodesmata-located protein 2	Stress-antifung	Stress-antifung
Gohir.A08G235600.1	NEC	EC	3.05182	6.86902e-13	2.28542e-11	PF12076,PF04116	0	0	0	0	GO:0008610,GO:0055114,GO:0005506,GO:0016491	0	AT5G57800	WAX2, putative, expressed; Fatty acid hydroxylase superfamily	Fatty acid hydroxylase superfamily	Wax2_C, FA_hydroxylase, adh_short, KR, THF_DHG_CYH_C	Wax2_C, FA_hydroxylase, adh_short, KR, THF_DHG_CYH_C
Gohir.D02G160000.1	NEC	EC	3.05076	0.0106884	0.0312568	PF04864	0	2.6.1.99	0	0	GO:0016846	K16903	AT1G70560	alliin lyase precursor, putative, expressed; tryptophan aminotransferase of Arabidopsis 1	tryptophan aminotransferase of Arabidopsis 1	Alliinase_C, Aminotran_1_2	Alliinase_C, Aminotran_1_2
Gohir.D09G038020.1	NEC	EC	3.04956	0.000378999	0.00176693	0	0	0	0	0	0	0	NA	NA	0	zf-MYST	zf-MYST
Gohir.1Z014800.1	NEC	EC	3.04629	1.77045e-09	2.9731e-08	PF13768	0	0	0	0	0	0	AT1G19110	von Willebrand factor type A domain containing protein, expressed; inter-alpha-trypsin inhibitor heavy chain-related	inter-alpha-trypsin inhibitor heavy chain-related	#N/A	#N/A
Gohir.A07G221300.1	NEC	EC	3.04566	2.42887e-11	6.03807e-10	PF00582	0	0	0	0	GO:0006950	0	AT5G14680	universal stress protein domain containing protein, putative, expressed; Adenine nucleotide alpha hydrolases-like superfamily protein	Adenine nucleotide alpha hydrolases-like superfamily protein	Usp	Usp
Gohir.D05G105000.1	NEC	EC	3.04411	3.46051e-09	5.45988e-08	PF00194	KOG0382	4.2.1.1	SignalP-noTM	K01674	0	0	AT1G08080	bifunctional monodehydroascorbate reductase and carbonic anhydrasenectarin-3 precursor, putative, expressed; alpha carbonic anhydrase 7	alpha carbonic anhydrase 7	Carb_anhydrase	Carb_anhydrase
Gohir.A05G251800.2	NEC	EC	3.04329	1.54199e-05	0.00010455	PF01301	KOG0496	3.2.1.23	0	0	GO:0004553,GO:0005975	0	AT1G77410	beta-galactosidase 7 precursor, putative, expressed; beta-galactosidase 16	Glycosyl hydrolase family 35 protein	Glyco_hydro_35, GHD, Glyco_hydro_42, BetaGal_dom4_5	Glyco_hydro_35, GHD, Glyco_hydro_42, BetaGal_dom4_5
Gohir.A03G215000.1	NEC	EC	3.03881	0.000857637	0.00362028	0	0	0	SignalP-noTM	0	0	0	NA	NA	armadillo repeat only 4	HEAT_2, Arm, RasGEF_N_2, V-ATPase_H_C	HEAT_2, Arm, RasGEF_N_2, V-ATPase_H_C
Gohir.D01G210400.2	NEC	EC	3.03871	0.000189334	0.000962582	PF11891	0	0	0	0	0	0	AT2G37860	expressed protein; Protein of unknown function (DUF3411)	Protein of unknown function (DUF3411)	RETICULATA-like	RETICULATA-like
Gohir.D11G026700.1	NEC	EC	3.03871	3.39337e-16	2.04995e-14	PF00046,PF04618,PF02183	KOG0483	0	0	0	GO:0003700,GO:0003677,GO:0006355,GO:0043565,GO:0005634	0	AT4G16780	homeobox associated leucine zipper, putative, expressed; homeobox protein 2	Homeobox-leucine zipper protein 4 (HB-4) / HD-ZIP protein	HD-ZIP_N, Homeodomain, HALZ, Homeobox_KN, NRBF2, YabA, Homez, GIT_CC	HD-ZIP_N, Homeodomain, HALZ, Homeobox_KN, NRBF2, YabA, Homez, GIT_CC
Gohir.D13G092650.1	NEC	EC	3.03765	1.93655e-08	2.60453e-07	0	0	0	0	0	0	0	NA	NA	NA	#N/A	#N/A
Gohir.A05G065800.1	NEC	EC	3.03639	9.31314e-10	1.67796e-08	PF02485	0	0	0	0	GO:0016020,GO:0008375	0	AT4G31350	DNA binding protein, putative, expressed; Core-2/I-branching beta-1,6-N-acetylglucosaminyltransferase family protein	Core-2/I-branching beta-1,6-N-acetylglucosaminyltransferase family protein	Branch, DUF4492, LptF_LptG	Branch, DUF4492, LptF_LptG
Gohir.A07G221900.1	NEC	EC	3.03579	6.91833e-10	1.2865e-08	PF13921	KOG0048	0	0	K09422	0	0	NA	NA	myb domain protein 118	Myb_DNA-binding, Myb_DNA-bind_6, SLIDE, Myb_DNA-bind_7, Rap1_C, SANT_DAMP1_like, PRIMA1, Mito_fiss_reg	Myb_DNA-binding, Myb_DNA-bind_6, SLIDE, Myb_DNA-bind_7, Rap1_C, SANT_DAMP1_like, PRIMA1, M
Gohir.A07G002500.1	NEC	EC	3.03561	2.26884e-10	4.65183e-09	PF11834,PF00027,PF12796,PF00520	KOG0498	0	0	0	GO:0055085,GO:0005216,GO:0006811,GO:0016020	0	AT2G26650	potassium channel AKT1, putative, expressed; K+ transporter 1	K+ transporter 1	Ion_trans, Ank_2, Ank, Ank_5, KHA, Ank_4, Ank_3, cNMP_binding, Ion_trans_2	Ion_trans, Ank_2, Ank, Ank_5, KHA, Ank_4, Ank_3, cNMP_binding, Ion_trans_2
Gohir.A05G087000.1	NEC	EC	3.03339	4.94054e-11	1.15665e-09	PF00010	0	0	0	0	GO:0046983	0	AT2G28160	helix-loop-helix DNA-binding domain containing protein, expressed; FER-like regulator of iron uptake	FER-like regulator of iron uptake	HLH, DUF1040, NAM-associated	HLH, DUF1040, NAM-associated
Gohir.D11G151600.1	NEC	EC	3.03111	1.83511e-23	3.3128e-21	0	0	2.7.11.1	0	0	0	0	NA	NA	0	FeoB_associated, DUF4064, DUF5472, Insulin_TMD, ATP_synt_H, TM_helix, TPPK_C, RIFIN	FeoB_associated, DUF4064, DUF5472, Insulin_TMD, ATP_synt_H, TM_helix, TPPK_C, RIFIN
Gohir.D08G110100.1	NEC	EC	3.03103	2.10878e-23	3.74827e-21	PF02458	0	2.3.1.133	0	0	GO:0016747	0	AT5G23940	transferase family protein, putative, expressed; HXXXD-type acyl-transferase family protein	HXXXD-type acyl-transferase family protein	Transferase	Transferase
Gohir.A08G191450.1	NEC	EC	3.03065	3.14034e-16	1.90706e-14	PF05899	0	0	0	0	0	0	AT4G28703	enzyme of the cupin superfamily protein, putative, expressed; RmlC-like cupins superfamily protein	RmlC-like cupins superfamily protein	Cupin_3, Cupin_2, Cupin_1	Cupin_3, Cupin_2, Cupin_1
Gohir.D05G040450.1	NEC	EC	3.02723	6.29616e-05	0.000364716	PF00249	0	0	0	0	0	0	AT3G13540	MYB family transcription factor, putative, expressed; myb domain protein 5	myb domain protein 5	Myb_DNA-binding, Myb_DNA-bind_6, Rap1_C, Myb_DNA-bind_7, EF-hand_4	Myb_DNA-binding, Myb_DNA-bind_6, Rap1_C, Myb_DNA-bind_7, EF-hand_4
Gohir.A03G155700.1	NEC	EC	3.02654	4.20698e-06	3.28747e-05	PF02298	0	0	SignalP-noTM	0	GO:0009055	0	AT4G32490	plastocyanin-like domain containing protein, putative, expressed; early nodulin-like protein 4	early nodulin-like protein 3	Cu_bind_like	Cu_bind_like
Gohir.A12G038000.1	NEC	EC	3.0257	5.86497e-21	7.46677e-19	PF00241	KOG1735	0	0	K05765	GO:0003779,GO:0015629,GO:0005622,GO:0030042	0	AT2G16700	actin-depolymerizing factor, putative, expressed; actin depolymerizing factor 5	actin depolymerizing factor 5	Cofilin_ADF, DUF3011	Cofilin_ADF, DUF3011
Gohir.D12G121200.1	NEC	EC	3.02563	0.00174192	0.00671515	PF13947,PF07714	KOG1187	2.7.11.1	SignalP-noTM	0	GO:0004672,GO:0006468,GO:0030247	0	AT2G46850	ATP binding protein, putative, expressed; Protein kinase superfamily protein	Protein kinase superfamily protein	Pkinase_Tyr, GUB_WAK_bind, Pkinase	Pkinase_Tyr, GUB_WAK_bind, Pkinase
Gohir.D09G204400.1	NEC	EC	3.0241	4.12472e-09	6.40954e-08	PF05419	0	0	0	0	0	0	NA	NA	enzyme binding;tetrapyrrole binding	GUN4, UPF0167	GUN4, UPF0167
Gohir.D05G266100.1	NEC	EC	3.02406	1.3719e-07	1.52663e-06	PF00644,PF12174,PF02825	0	2.4.2.30	0	0	GO:0003950	0	NA	NA	WWE protein-protein interaction domain protein family	RST, PARP, WWE	RST, PARP, WWE
Gohir.D11G341700.5	NEC	EC	3.02318	1.07826e-06	9.71735e-06	PF00076,PF00658	KOG0123	0	0	0	GO:0003676,GO:0003723	0	AT2G36660	polyadenylate-binding protein, putative, expressed; poly(A) binding protein 7	poly(A) binding protein 7	RRM_1, PABP, RRM_3, RRM_7, RRM_occluded, Nup35_RRM_2, SET_assoc, TC1, Limkain-b1, OB_RNB, DUF5526, PHM7_cyt	RRM_1, PABP, RRM_3, RRM_7, RRM_occluded, Nup35_RRM_2, SET_assoc, TC1, Limkain-b1, OB_RNB,
Gohir.D07G205100.1	NEC	EC	3.02016	5.35106e-14	2.19427e-12	PF00810	KOG3106	0	0	0	GO:0016021,GO:0046923,GO:0006621	0	AT3G25160	ER lumen protein retaining receptor containing protein, expressed; ER lumen protein retaining receptor family protein	ER lumen protein retaining receptor family protein	ER_lumen_recept, YafQ_toxin	ER_lumen_recept, YafQ_toxin
Gohir.A10G020700.1	NEC	EC	3.01998	1.95965e-12	6.02549e-11	PF07887	0	0	0	0	GO:0005516,GO:0006950	0	AT5G57580	calmodulin binding protein, putative, expressed; Calmodulin-binding protein	Calmodulin-binding protein	Calmodulin_bind	Calmodulin_bind
Gohir.A06G001300.1	NEC	EC	3.01938	1.67405e-19	1.73076e-17	PF13639	0	0	0	K19037	0	0	AT5G42200	zinc finger, C3HC4 type domain containing protein, expressed; RING/U-box superfamily protein	RING/U-box superfamily protein	zf-RING_2, zf-RING_11, zf-C3HC4_2, zf-rbx1, zf-C3HC4, zf-C3HC4_3, zf-RING_5, zf-RING_UBOX, Zn_ribbon_17, zf-ANAPC11, Prok-RING_4, Prok-RING_1, zinc_ribbon_16, DUF1272, zf-RING_4, Tmpp129, PHD, zf-C3H2C3, RINGv, Vps39_2, zf-Di19, FANCL_C, zf-RING-like	zf-RING_2, zf-RING_11, zf-C3HC4_2, zf-rbx1, zf-C3HC4, zf-C3HC4_3, zf-RING_5, zf-RING_UBOX,
Gohir.A09G094500.1	NEC	EC	3.01896	6.57047e-12	1.83473e-10	PF00069	KOG0610	2.7.11.1	0	0	GO:0004672,GO:0006468,GO:0005524	0	AT3G44610	AGC_PVPK_like_kin82y.1 - ACG kinases include homologs to PKA, PKG and PKC, expressed; Protein kinase superfamily protein	Protein kinase superfamily protein	Pkinase, Pkinase_Tyr, Kinase-like, Kdo, Secretin_N_2	Pkinase, Pkinase_Tyr, Kinase-like, Kdo, Secretin_N_2
Gohir.A13G127100.1	NEC	EC	3.0177	8.6471e-07	7.99874e-06	PF08879,PF02373	0	0	0	K15601	0	0	AT1G11950	jmjC domain containing protein, expressed; Transcription factor jumonji (jmjC) domain-containing protein	transcription factor jumonji (jmjC) domain-containing protein	JmjC, WRC, zf-4CXXC_R1, Cupin_8, Cupin_2	JmjC, WRC, zf-4CXXC_R1, Cupin_8, Cupin_2
Gohir.A03G161300.1	NEC	EC	3.01742	2.65636e-14	1.16251e-12	0	0	0	0	0	0	0	NA	NA	0	DUF1673, TMEM154	DUF1673, TMEM154
Gohir.D10G028500.1	NEC	EC	3.01708	2.21714e-06	1.86636e-05	PF05078	0	0	0	0	0	0	AT4G18425	expressed protein; Protein of unknown function (DUF679)	Protein of unknown function (DUF679)	DUF679	DUF679
Gohir.A05G135600.1	NEC	EC	3.01708	6.98859e-23	1.17018e-20	PF00732,PF05199	KOG1238	0	SignalP-noTM	0	GO:0055114,GO:0050660,GO:0016614	K15403	AT1G72970	HOTHEAD precursor, putative, expressed; Glucose-methanol-choline (GMC) oxidoreductase family protein	Glucose-methanol-choline (GMC) oxidoreductase family protein	GMC_oxred_N, GMC_oxred_C, NAD_binding_8, FAD_binding_2, DAO, Lycopene_cycl, Pyr_redox_2, Thi4	GMC_oxred_N, GMC_oxred_C, NAD_binding_8, FAD_binding_2, DAO, Lycopene_cycl, Pyr_redox_2, T
Gohir.A10G183000.1	NEC	EC	3.01615	7.32229e-07	6.87929e-06	PF00191	KOG0819	0	0	K17099	GO:0005544,GO:0005509	0	AT5G12380	annexin, putative, expressed; annexin 8	annexin 8	Annexin	Annexin
Gohir.D11G116200.1	NEC	EC	3.0161	1.11946e-17	8.64786e-16	PF07816	0	0	0	0	0	0	AT3G62630	expressed protein; Protein of unknown function (DUF1645)	Protein of unknown function (DUF1645)	DUF1645	DUF1645
Gohir.A12G045300.3	NEC	EC	3.01554	8.25283e-07	7.6786e-06	PF00069	KOG0600	2.7.11.22	0	0	GO:0004672,GO:0006468,GO:0005524	0	AT1G09600	protein kinase family protein, putative, expressed; Protein kinase superfamily protein	Protein kinase superfamily protein	Pkinase, Pkinase_Tyr, Kinase-like, FTA2, APH, Seadorna_VP7	Pkinase, Pkinase_Tyr, Kinase-like, FTA2, APH, Seadorna_VP7
Gohir.D08G092866.1	NEC	EC	3.01483	1.2037e-12	3.82059e-11	PF00122,PF00702	KOG0207	3.6.3.5	0	K01534	0	0	AT4G30110	cadmium/zinc-transporting ATPase, putative, expressed; heavy metal atpase 2	heavy metal atpase 2	E1-E2_ATPase, Hydrolase, HMA, CRF-BP	E1-E2_ATPase, Hydrolase, HMA, CRF-BP
Gohir.D11G115100.1	NEC	EC	3.01115	0.00943606	0.028145	PF14009	0	0	0	0	0	0	NA	NA	0	DUF4228	DUF4228
Gohir.A01G178300.1	NEC	EC	3.0106	8.60429e-05	0.000482016	PF02182	0	0	0	0	0	0	AT5G47160	histone-lysine N-methyltransferase, H3 lysine-9 specific SUVH1, putative, expressed; YDG/SRA domain-containing protein	YDG/SRA domain-containing protein	SAD_SRA	SAD_SRA
Gohir.D08G253300.1	NEC	EC	3.0105	1.87693e-10	3.92668e-09	PF02365	0	0	0	0	GO:0006355,GO:0003677	0	AT2G43000	no apical meristem protein, putative, expressed; NAC domain containing protein 42	NAC domain containing protein 42	NAM	NAM
Gohir.D12G245700.1	NEC	EC	3.01034	9.7557e-07	8.90831e-06	PF04654	0	0	0	0	0	0	AT5G24600	expressed protein; Protein of unknown function, DUF599	Protein of unknown function, DUF599	DUF599, DUF373	DUF599, DUF373
Gohir.A08G098500.2	NEC	EC	3.01022	9.31491e-23	1.54294e-20	PF02458	0	2.3.1.133	0	0	GO:0016747	0	AT5G23940	transferase family protein, putative, expressed; HXXXD-type acyl-transferase family protein	HXXXD-type acyl-transferase family protein	Transferase	Transferase
Gohir.A04G145100.1	NEC	EC	3.00973	2.04811e-12	6.26416e-11	PF00201	KOG1192	0	0	0	GO:0008152,GO:0016758	0	AT5G03490	indole-3-acetate beta-glucosyltransferase, putative, expressed; UDP-Glycosyltransferase superfamily protein	UDP-Glycosyltransferase superfamily protein	UDPGT	UDPGT
Gohir.D03G020000.1	NEC	EC	3.00928	0.000223955	0.00111685	PF00249	KOG0048	0	0	K09422	0	0	AT2G47460	MYB family transcription factor, putative, expressed; myb domain protein 12	myb domain protein 12	Myb_DNA-binding, Myb_DNA-bind_6	Myb_DNA-binding, Myb_DNA-bind_6
Gohir.A05G225250.1	NEC	EC	3.00921	0.0380574	0.0893782	PF04674	0	0	0	0	0	0	NA	NA	EXORDIUM like 2	Phi_1	Phi_1
Gohir.D08G238900.2	NEC	EC	3.0076	0.00207154	0.00779449	PF14543,PF14541	KOG1339	3.4.23.12	0	0	GO:0004190,GO:0006508	0	AT1G64830	aspartic proteinase nepenthesin-1 precursor, putative, expressed; Eukaryotic aspartyl protease family protein	Eukaryotic aspartyl protease family protein	TAXi_N, TAXi_C, Asp	TAXi_N, TAXi_C, Asp
Gohir.A07G117900.1	NEC	EC	3.00675	1.82631e-10	3.83466e-09	PF00069	KOG0583	2.7.11.1	0	0	GO:0006468,GO:0004672,GO:0005524	0	AT5G60550	CAMK_KIN1/SNF1/Nim1_like.18 - CAMK includes calcium/calmodulin depedent protein kinases, expressed; geminivirus rep interacting kinase 2	geminivirus rep interacting kinase 2	Pkinase, Pkinase_Tyr, Kinase-like, Pkinase_fungal, Seadorna_VP7, APH, WaaY, FTA2, RIO1	Pkinase, Pkinase_Tyr, Kinase-like, Pkinase_fungal, Seadorna_VP7, APH, WaaY, FTA2, RIO1
Gohir.D07G098300.1	NEC	EC	3.00588	9.83948e-34	5.98318e-31	0	0	0	0	0	0	0	NA	NA	0	EF-hand_9	EF-hand_9
Gohir.A05G377550.1	NEC	EC	3.00587	0.0380089	0.0892733	0	0	0	0	0	0	0	NA	NA	NA	#N/A	#N/A
Gohir.A02G135200.1	NEC	EC	3.00574	4.76679e-06	3.67767e-05	PF00067	KOG0156	0	0	0	GO:0020037,GO:0016705,GO:0005506,GO:0055114	0	AT5G09970	cytochrome P450, putative, expressed; cytochrome P450, family 78, subfamily A, polypeptide 7	cytochrome P450, family 78, subfamily A, polypeptide 7	p450	p450
Gohir.A13G220700.1	NEC	EC	3.00357	9.05247e-26	2.28607e-23	0	0	0	0	0	0	0	NA	NA	0	#N/A	#N/A
Gohir.D13G003500.1	NEC	EC	3.00316	5.61628e-05	0.000329672	PF00847	0	0	0	0	GO:0007275,GO:0006355,GO:0003700	0	AT3G54320	AP2 domain containing protein, expressed; Integrase-type DNA-binding superfamily protein	Integrase-type DNA-binding superfamily protein	AP2, NAM-associated	AP2, NAM-associated
Gohir.A06G180000.2	NEC	EC	3.00312	4.02614e-06	3.16274e-05	PF03106	0	0	0	0	GO:0003700,GO:0006355,GO:0043565	0	AT3G56400	WRKY45, expressed; WRKY DNA-binding protein 70	WRKY DNA-binding protein 70	WRKY, ICAM_N, MCCD1	WRKY, ICAM_N, MCCD1
Gohir.A10G162100.1	NEC	EC	3.00281	1.19506e-12	3.79578e-11	PF07714	KOG1187	2.7.11.1	0	K04730	GO:0004672,GO:0006468	0	AT3G26700	protein kinase, putative, expressed; Protein kinase superfamily protein	Protein kinase superfamily protein	Pkinase_Tyr, Pkinase, EphA2_TM, DUF4245	Pkinase_Tyr, Pkinase, EphA2_TM, DUF4245
Gohir.A13G169000.1	NEC	EC	3.00272	2.19378e-09	3.6118e-08	PF05030	KOG3227	0	0	0	GO:0003713	0	NA	NA	SSXT family protein	SSXT, Elf4	SSXT, Elf4
Gohir.A05G059800.1	NEC	EC	3.00249	0.00240884	0.00887808	0	0	0	0	0	0	0	AT4G31830	expressed protein	0	Gram_pos_anchor, DNA_pol3_alpha	Gram_pos_anchor, DNA_pol3_alpha
Gohir.A13G220600.1	NEC	EC	3.00214	3.55386e-08	4.48492e-07	PF02778	0	4.6.1.16	0	0	GO:0000213,GO:0006388	0	AT3G45590	tRNA-splicing endonuclease subunit Sen2, putative, expressed; splicing endonuclease 1	splicing endonuclease 1	tRNA_int_endo_N	tRNA_int_endo_N
Gohir.A09G135100.1	NEC	EC	3.00117	2.928e-12	8.70749e-11	0	0	0	0	0	0	0	NA	NA	0	DUF3328	DUF3328
Gohir.A05G280450.1	NEC	EC	2.99985	0.000645881	0.00283024	PF02714,PF13967,PF14703	KOG1134	0	0	0	GO:0016020	0	AT3G54510	early-responsive to dehydration protein-related, putative, expressed; Early-responsive to dehydration stress protein (ERD4)	Early-responsive to dehydration stress protein (ERD4)	RSN1_7TM, RSN1_TM, PHM7_cyt, RRM_1, Taxilin	RSN1_7TM, RSN1_TM, PHM7_cyt, RRM_1, Taxilin
Gohir.A10G102500.1	NEC	EC	2.99911	0.00226428	0.00841101	PF01277	0	0	0	0	GO:0012511,GO:0016021	0	AT3G01570	oleosin, putative, expressed; Oleosin family protein	Oleosin family protein	Oleosin, DUF3487	Oleosin, DUF3487
Gohir.D11G131801.1	NEC	EC	2.99835	2.04721e-10	4.2502e-09	PF14309,PF14383	0	0	0	0	GO:0051513	0	NA	NA	0	DUF4378, VARLMGL	DUF4378, VARLMGL
Gohir.D11G263900.3	NEC	EC	2.99765	9.9108e-14	3.8848e-12	PF00069	KOG0589	2.7.11.1	0	K08857	GO:0005524,GO:0006468,GO:0004672	0	AT1G54510	LSTK-1-like kinase, putative, expressed; NIMA-related serine/threonine kinase 1	NIMA-related serine/threonine kinase 1	Pkinase, Pkinase_Tyr, Kinase-like, Pkinase_fungal	Pkinase, Pkinase_Tyr, Kinase-like, Pkinase_fungal
Gohir.D13G118400.1	NEC	EC	2.99553	9.65781e-10	1.72927e-08	PF03007,PF06974	0	2.3.1.75	0	0	GO:0004144,GO:0045017	0	AT3G49200	wax synthase, putative, expressed; O-acyltransferase (WSD1-like) family protein	O-acyltransferase (WSD1-like) family protein	DUF1298, WES_acyltransf, Condensation, Glyco_hydro38C2, CotH, PsaX	DUF1298, WES_acyltransf, Condensation, Glyco_hydro38C2, CotH, PsaX
Gohir.D07G000900.2	NEC	EC	2.99506	0.000176851	0.000905998	PF02485	0	0	0	0	GO:0008375,GO:0016020	0	AT4G31350	DNA binding protein, putative, expressed; Core-2/I-branching beta-1,6-N-acetylglucosaminyltransferase family protein	Core-2/I-branching beta-1,6-N-acetylglucosaminyltransferase family protein	Branch, DUF4492, SNARE_assoc, Smim3	Branch, DUF4492, SNARE_assoc, Smim3
Gohir.D01G175500.1	NEC	EC	2.99475	3.11034e-08	3.98838e-07	PF03195	0	0	0	0	0	0	AT1G68510	DUF260 domain containing protein, putative, expressed; LOB domain-containing protein 42	LOB domain-containing protein 42	LOB	LOB
Gohir.A13G201000.1	NEC	EC	2.99459	9.57874e-11	2.11805e-09	PF03006	KOG0748	0	0	0	GO:0016021	0	AT5G20270	haemolysin-III, putative, expressed; heptahelical transmembrane protein1	heptahelical transmembrane protein1	HlyIII, Oxidored_q3	HlyIII, Oxidored_q3
Gohir.D07G120800.1	NEC	EC	2.99397	2.95757e-06	2.40297e-05	PF00190	0	0	0	0	GO:0045735	0	AT2G28490	cupin domain containing protein, expressed; RmlC-like cupins superfamily protein	RmlC-like cupins superfamily protein	Cupin_1, Cupin_2, DUF2371	Cupin_1, Cupin_2, DUF2371
Gohir.D04G117100.1	NEC	EC	2.99298	6.91021e-20	7.49644e-18	PF03649	0	0	0	K02069	0	0	AT2G37330	ABC transporter, membrane-spanning/permease subunit, putative, expressed; aluminum sensitive 3	aluminum sensitive 3	UPF0014, FtsH_ext, YtpI	UPF0014, FtsH_ext, YtpI
Gohir.A07G054400.1	NEC	EC	2.99283	5.47192e-07	5.2948e-06	PF13177	KOG0989	2.7.7.7	0	0	0	0	AT4G24790	ATP binding protein, putative, expressed; AAA-type ATPase family protein	AAA-type ATPase family protein	DNA_pol3_delta2, AAA, DNA_pol3_gamma3, AAA_22, AAA_33, AAA_16, RuvB_N, AAA_14, AAA_30, DNA_pol3_delta, ResIII	DNA_pol3_delta2, AAA, DNA_pol3_gamma3, AAA_22, AAA_33, AAA_16, RuvB_N, AAA_14, AAA_30, DNA
Gohir.D04G082000.1	NEC	EC	2.98938	5.55623e-09	8.3804e-08	PF00072,PF06203	0	0	0	0	GO:0005515,GO:0000160	0	AT5G02810	response regulator receiver domain containing protein, expressed; pseudo-response regulator 7	pseudo-response regulator 7	CCT, Response_reg, CCT_2, RAP1, Peptidase_M23	CCT, Response_reg, CCT_2, RAP1, Peptidase_M23
Gohir.A10G145500.1	NEC	EC	2.98811	0.000164547	0.000850029	0	0	0	0	0	0	0	NA	NA	0	#N/A	#N/A
Gohir.D02G020600.1	NEC	EC	2.98645	2.10989e-09	3.48945e-08	PF00201	KOG1192	2.4.1.271	0	K12338	GO:0008152,GO:0016758	0	AT4G15550	UDP-glucoronosyl and UDP-glucosyl transferase domain containing protein, expressed; indole-3-acetate beta-D-glucosyltransferase	UDP-glucosyltransferase 75B1	UDPGT, Glyco_trans_1_4, Glyco_tran_28_C, Glyco_transf_28	UDPGT, Glyco_trans_1_4, Glyco_tran_28_C, Glyco_transf_28
Gohir.D04G013500.1	NEC	EC	2.98598	4.13688e-10	8.0261e-09	0	0	0	0	0	0	0	NA	NA	0	DUF688	DUF688
Gohir.D13G182600.1	NEC	EC	2.98595	2.45788e-10	4.9951e-09	PF04398	0	0	0	0	0	0	AT1G56580	DUF538 domain containing protein, putative, expressed; Protein of unknown function, DUF538	Protein of unknown function, DUF538	DUF538	DUF538
Gohir.A02G054701.1	NEC	EC	2.98409	8.41126e-19	7.63689e-17	PF00989,PF07714	KOG0192	2.7.11.1	0	0	GO:0006355,GO:0006468,GO:0004672	0	AT3G06620	protein kinase family protein, putative, expressed; PAS domain-containing protein tyrosine kinase family protein	PAS domain-containing protein tyrosine kinase family protein	Pkinase_Tyr, Pkinase, PAS, PAS_3, PAS_9, PAS_8, PAS_4, APH, Haspin_kinase, Kinase-like, PAS_7, PAS_10, RIO1	Pkinase_Tyr, Pkinase, PAS, PAS_3, PAS_9, PAS_8, PAS_4, APH, Haspin_kinase, Kinase-like, PA
Gohir.A13G071500.1	NEC	EC	2.98366	0.0109774	0.0319224	0	0	0	0	K02986	0	0	AT2G07734	chloroplast 30S ribosomal protein S4, putative, expressed; Alpha-L RNA-binding motif/Ribosomal protein S4 family protein	Alpha-L RNA-binding motif/Ribosomal protein S4 family protein	#N/A	#N/A
Gohir.A11G265601.1	NEC	EC	2.98139	0.000126085	0.000673706	0	0	0	0	0	0	0	NA	NA	0	DUF3099, DUF1129, DUF2070, DUF5090	DUF3099, DUF1129, DUF2070, DUF5090
Gohir.D13G197925.1	NEC	EC	2.98092	2.71385e-16	1.67447e-14	PF01843	0	0	0	K10357	0	0	AT5G20490	myosin, putative, expressed; Myosin family protein with Dil domain	Myosin family protein with Dil domain	DIL, Flp1_like	DIL, Flp1_like
Gohir.D09G030000.1	NEC	EC	2.9781	7.85926e-15	3.79925e-13	0	0	0	0	0	0	0	NA	NA	0	#N/A	#N/A
Gohir.D05G306600.1	NEC	EC	2.97614	1.06909e-14	5.00575e-13	PF07983	0	0	SignalP-noTM	0	0	0	AT1G13830	X8 domain containing protein, expressed; Carbohydrate-binding X8 domain superfamily protein	plasmodesmata callose-binding protein 3	X8	X8
Gohir.A05G338300.4	NEC	EC	2.976	2.7909e-08	3.63295e-07	0	0	0	0	0	0	0	NA	NA	0	zf-FLZ	zf-FLZ
Gohir.D08G147400.1	NEC	EC	2.97598	2.78442e-13	1.01083e-11	PF03168	0	0	0	0	0	0	AT2G46300	harpin-induced protein 1 domain containing protein, expressed; Late embryogenesis abundant (LEA) hydroxyproline-rich glycoprotein family	Late embryogenesis abundant (LEA) hydroxyproline-rich glycoprotein family	LEA_2	LEA_2
Gohir.D02G125000.1	NEC	EC	2.97539	1.97092e-08	2.64702e-07	PF04116	KOG0874	1.14.13.169	0	0	GO:0008610,GO:0055114,GO:0005506,GO:0016491	0	AT1G69640	sphingolipid C4-hydroxylase SUR2, putative, expressed; sphingoid base hydroxylase 1	sphingoid base hydroxylase 2	FA_hydroxylase, Cation_ATPase_C, DUF1673	FA_hydroxylase, Cation_ATPase_C, DUF1673
Gohir.D11G077200.3	NEC	EC	2.97452	2.15054e-08	2.86764e-07	PF00128,PF07821	KOG0471	3.2.1.1	0	K01176	GO:0003824,GO:0005975,GO:0004556,GO:0005509	0	NA	NA	alpha-amylase-like 3	Alpha-amylase, Alpha-amyl_C2, BING4CT	Alpha-amylase, Alpha-amyl_C2, BING4CT
Gohir.D05G046400.1	NEC	EC	2.97401	1.69949e-06	1.46612e-05	PF01277	0	0	0	0	GO:0012511,GO:0016021	0	AT2G25890	oleosin, putative, expressed; Oleosin family protein	Oleosin family protein	Oleosin, PrgI	Oleosin, PrgI
Gohir.D09G084101.1	NEC	EC	2.97399	0.00651727	0.0206026	0	0	0	0	0	0	0	NA	NA	NA	#N/A	#N/A
Gohir.1Z049482.1	NEC	EC	2.9739	0.0338177	0.0809815	PF10839	0	0	0	0	0	0	NA	NA	0	#N/A	#N/A
Gohir.D09G052978.1	NEC	EC	2.97362	1.64774e-09	2.78118e-08	PF03140	0	0	0	0	0	0	NA	NA	Plant protein of unknown function (DUF247)	DUF247, TMEM18	DUF247, TMEM18
Gohir.D13G117000.1	NEC	EC	2.97062	5.02897e-05	0.000298841	PF03283	KOG4287	0	SignalP-TM	0	GO:0016787	0	AT5G26670	pectinacetylesterase domain containing protein, expressed; Pectinacetylesterase family protein	Pectinacetylesterase family protein	PAE	PAE
Gohir.D01G055801.1	NEC	EC	2.97044	3.48788e-08	4.40648e-07	PF02362	0	0	0	0	GO:0003677	0	NA	NA	high-level expression of sugar-inducible gene 2	B3, Med3, DUF313	B3, Med3, DUF313
Gohir.D12G119700.1	NEC	EC	2.97043	0.000542794	0.0024321	PF13178,PF00612	0	0	0	0	GO:0005515	0	AT4G00820	IQ calmodulin-binding motif domain containing protein, expressed; IQ-domain 17	IQ-domain 17	DUF4005, IQ, DUF4758	DUF4005, IQ, DUF4758
Gohir.D13G217900.1	NEC	EC	2.96919	1.34452e-05	9.27816e-05	PF03492	0	0	0	0	GO:0008168	0	AT5G66430	SAM dependent carboxyl methyltransferase, putative, expressed; S-adenosyl-L-methionine-dependent methyltransferases superfamily protein	S-adenosyl-L-methionine-dependent methyltransferases superfamily protein	Methyltransf_7	Methyltransf_7
Gohir.D08G117600.1	NEC	EC	2.96469	0.0290472	0.0714341	0	0	0	0	0	0	0	NA	NA	0	#N/A	#N/A
Gohir.1Z049433.1	NEC	EC	2.96343	0.0795698	0.16168	PF00515	0	0	0	0	GO:0005515	0	NA	NA	peroxin 5	#N/A	#N/A
Gohir.D13G220600.1	NEC	EC	2.96327	3.51452e-14	1.49283e-12	PF11891	0	0	0	0	0	0	AT5G12470	expressed protein; Protein of unknown function (DUF3411)	Protein of unknown function (DUF3411)	RETICULATA-like	RETICULATA-like
Gohir.A09G090000.1	NEC	EC	2.96316	4.09818e-14	1.71552e-12	PF00387,PF09279,PF00168,PF00388	KOG0169	3.1.4.11	0	K05857	GO:0006629,GO:0035556,GO:0007165,GO:0004435	0	AT5G58700	phospholipase C, putative, expressed; phosphatidylinositol-speciwc phospholipase C4	phosphatidylinositol-speciwc phospholipase C4	PI-PLC-X, PI-PLC-Y, C2, EF-hand_like, GDPD	PI-PLC-X, PI-PLC-Y, C2, EF-hand_like, GDPD
Gohir.D05G232500.1	NEC	EC	2.96243	5.99446e-05	0.000349298	0	0	0	0	0	0	0	NA	NA	0	#N/A	#N/A
Gohir.D10G201000.1	NEC	EC	2.96104	1.06416e-10	2.33742e-09	PF00847	0	0	0	0	GO:0006355,GO:0003700,GO:0007275	0	AT3G54320	AP2 domain containing protein, expressed; Integrase-type DNA-binding superfamily protein	Integrase-type DNA-binding superfamily protein	AP2, DUF719, Kin17_mid, Suf	AP2, DUF719, Kin17_mid, Suf
Gohir.D07G103900.1	NEC	EC	2.96079	3.66835e-08	4.61053e-07	PF06547,PF13639,PF14369	KOG1493	6.3.2.19	0	0	0	0	AT3G46620	zinc finger, RING-type, putative, expressed; zinc finger (C3HC4-type RING finger) family protein	zinc finger (C3HC4-type RING finger) family protein	DUF1117, zinc_ribbon_9, zf-RING_2, zf-C3HC4_2, zf-RING_11, zf-rbx1, zf-RING_UBOX, zf-C3HC4, zf-RING_5, zf-C3HC4_3, Prok-RING_4, zf-ANAPC11, zf-RING-like, DUF1272, zf-RING_10, C1_1, zf-ribbon_3	DUF1117, zinc_ribbon_9, zf-RING_2, zf-C3HC4_2, zf-RING_11, zf-rbx1, zf-RING_UBOX, zf-C3HC4
Gohir.D05G134200.1	NEC	EC	2.96066	3.35352e-07	3.42043e-06	PF00612,PF13178	0	0	0	0	GO:0005515	0	AT3G16490	IQ calmodulin-binding motif family protein, expressed; IQ-domain 26	IQ-domain 26	DUF4005, IQ, Ribosomal_60s	DUF4005, IQ, Ribosomal_60s
Gohir.D02G202857.1	NEC	EC	2.9599	0.0439071	0.100278	PF11568	0	0	0	0	GO:0009631,GO:0010150,GO:0006355,GO:0016592,GO:0048364	0	AT1G11760	expressed protein	0	Med29, Cullin, Cdh1_DBD_1, FlaF	Med29, Cullin, Cdh1_DBD_1, FlaF
Gohir.D11G041000.1	NEC	EC	2.95943	0.0593601	0.127933	PF04535	0	0	0	0	0	0	NA	NA	Uncharacterised protein family (UPF0497)	DUF588, YitT_membrane	DUF588, YitT_membrane
Gohir.D11G271333.1	NEC	EC	2.95812	3.09882e-12	9.15658e-11	PF07714	KOG1187	2.7.11.1	0	0	GO:0004672,GO:0006468	0	AT3G05140	protein kinase domain containing protein, expressed; ROP binding protein kinases 2	homolog of yeast autophagy 18 (ATG18) H	Pkinase_Tyr, Pkinase, APH, Pkinase_fungal, Thyroglob_assoc	Pkinase_Tyr, Pkinase, APH, Pkinase_fungal, Thyroglob_assoc
Gohir.A11G086500.1	NEC	EC	2.95771	1.90056e-09	3.16855e-08	0	0	0	0	0	0	0	NA	NA	0	zf-CCHC_2, zinc-ribbons_6, zinc_ribbon_4, zf-CCHC_4, C1_1, zf-CCHC, zf_UBZ, Zn_ribbon_recom	zf-CCHC_2, zinc-ribbons_6, zinc_ribbon_4, zf-CCHC_4, C1_1, zf-CCHC, zf_UBZ, Zn_ribbon_reco
Gohir.D08G157200.1	NEC	EC	2.95658	2.64838e-07	2.75907e-06	PF04640	0	0	0	0	0	0	AT3G60670	zinc-binding protein, putative, expressed; PLATZ transcription factor family protein	PLATZ transcription factor family protein	PLATZ, zf-B_box, Ecl1	PLATZ, zf-B_box, Ecl1
Gohir.D06G134400.1	NEC	EC	2.95656	1.89235e-08	2.55338e-07	PF00657	0	3.1.1.49	SignalP-noTM	0	GO:0016788	0	AT5G45910	GDSL-like lipase/acylhydrolase, putative, expressed; GDSL-like Lipase/Acylhydrolase superfamily protein	GDSL-like Lipase/Acylhydrolase superfamily protein	Lipase_GDSL, Lipase_GDSL_2	Lipase_GDSL, Lipase_GDSL_2
Gohir.A07G146800.1	NEC	EC	2.95597	1.19278e-09	2.07777e-08	PF04640	0	0	0	0	0	0	AT3G60670	zinc-binding protein, putative, expressed; PLATZ transcription factor family protein	PLATZ transcription factor family protein	PLATZ, zf-B_box	PLATZ, zf-B_box
Gohir.D06G055300.1	NEC	EC	2.95555	7.04998e-13	2.33669e-11	PF01633	KOG4720	2.7.1.82	0	0	0	0	AT2G26830	choline/ethanolamine kinase, putative, expressed; Protein kinase superfamily protein	Protein kinase superfamily protein	Choline_kinase, APH	Choline_kinase, APH
Gohir.D05G098200.1	NEC	EC	2.95271	9.80922e-18	7.68345e-16	PF03939,PF00276	KOG1751	0	0	K02893	GO:0003735,GO:0005840,GO:0006412	0	AT3G55280	60S ribosomal protein L23A, putative, expressed; ribosomal protein L23AB	ribosomal protein L23AB	Ribosomal_L23eN, Ribosomal_L23	Ribosomal_L23eN, Ribosomal_L23
Gohir.D13G070900.3	NEC	EC	2.9506	1.8349e-06	1.57237e-05	PF07716,PF14144	0	0	0	0	GO:0006355,GO:0003700,GO:0006351,GO:0043565	0	AT1G68640	transcription factor, putative, expressed; bZIP transcription factor family protein	bZIP transcription factor family protein	DOG1, bZIP_2, bZIP_1	DOG1, bZIP_2, bZIP_1
Gohir.D07G061900.1	NEC	EC	2.95037	4.71183e-07	4.63304e-06	PF03088	KOG1520	4.3.3.2	SignalP-noTM	0	GO:0016844,GO:0009058	0	NA	NA	strictosidine synthase 3	Str_synth, NHL	Str_synth, NHL
Gohir.D09G247800.1	NEC	EC	2.94987	7.32612e-08	8.63477e-07	PF00403	KOG1603	0	0	0	GO:0046872,GO:0030001	0	AT5G63530	heavy metal-associated domain containing protein, expressed; farnesylated protein 3	Heavy metal transport/detoxification superfamily protein	HMA, HMw1_D2, PTPRCAP	HMA, HMw1_D2, PTPRCAP
Gohir.D01G218600.1	NEC	EC	2.94823	2.17526e-08	2.89538e-07	PF00170	0	0	0	0	GO:0006355,GO:0003700	0	NA	NA	Basic-leucine zipper (bZIP) transcription factor family protein	bZIP_1, bZIP_2, bZIP_Maf	bZIP_1, bZIP_2, bZIP_Maf
Gohir.D02G117150.1	NEC	EC	2.94788	0.0467897	0.105614	0	0	0	0	0	0	0	NA	NA	NA	#N/A	#N/A
Gohir.A02G145800.1	NEC	EC	2.94769	5.41427e-06	4.13169e-05	PF06045,PF14686,PF14683	0	4.2.2.23	0	K18195	0	0	AT2G22620	rhamnogalacturonate lyase, putative, expressed; Rhamnogalacturonate lyase family protein	Rhamnogalacturonate lyase family protein	Rhamnogal_lyase, CBM-like, fn3_3, CarboxypepD_reg, CarbopepD_reg_2, DUF2012, DUF2761, RhgB_N	Rhamnogal_lyase, CBM-like, fn3_3, CarboxypepD_reg, CarbopepD_reg_2, DUF2012, DUF2761, RhgB
Gohir.D05G264600.1	NEC	EC	2.94568	3.70645e-07	3.74486e-06	PF00249	KOG0048	0	0	K09422	0	0	AT4G37260	MYB family transcription factor, putative, expressed; myb domain protein 73	myb domain protein 73	Myb_DNA-binding, Myb_DNA-bind_6, Myb_DNA-bind_7, SLIDE	Myb_DNA-binding, Myb_DNA-bind_6, Myb_DNA-bind_7, SLIDE
Gohir.D05G359200.1	NEC	EC	2.94552	5.88566e-05	0.000343695	PF00106	KOG1208	1.3.1.33	0	K00218	GO:0016630,GO:0055114	0	AT5G54190	oxidoreductase, short chain dehydrogenase/reductase family domain containing family, expressed; protochlorophyllide oxidoreductase A	protochlorophyllide oxidoreductase A	adh_short, adh_short_C2, KR, Eno-Rase_NADH_b	adh_short, adh_short_C2, KR, Eno-Rase_NADH_b
Gohir.A07G075600.1	NEC	EC	2.94413	1.01641e-08	1.44575e-07	PF14368	0	0	SignalP-TM	0	0	0	NA	NA	Bifunctional inhibitor/lipid-transfer protein/seed storage 2S albumin superfamily protein	LTP_2, Tryp_alpha_amyl	LTP_2, Tryp_alpha_amyl
Gohir.A01G033600.2	NEC	EC	2.94389	0.0339881	0.0813299	PF00072	0	0	0	0	GO:0000160	0	AT4G16110	two-component response regulator, putative, expressed; response regulator 2	response regulator 2	Response_reg	Response_reg
Gohir.A03G132100.1	NEC	EC	2.94244	1.22674e-12	3.88571e-11	PF04059,PF00076	KOG4660	0	0	0	GO:0003676	0	AT3G26120	AML1, putative, expressed; terminal EAR1-like 1	terminal EAR1-like 1	RRM_2, RRM_1, RRM_5, RRM_occluded, EF-hand_12	RRM_2, RRM_1, RRM_5, RRM_occluded, EF-hand_12
Gohir.D03G113600.1	NEC	EC	2.94236	7.44629e-08	8.763e-07	PF00646	0	0	0	0	GO:0005515	0	AT5G63520	0	0	F-box, F-box-like	F-box, F-box-like
Gohir.A01G003400.1	NEC	EC	2.94201	8.07499e-05	0.000455817	PF00160	KOG0865	5.2.1.8	0	K01802	GO:0000413,GO:0003755	0	AT2G16600	peptidyl-prolyl cis-trans isomerase, putative, expressed; rotamase CYP 3	rotamase CYP 3	Pro_isomerase	Pro_isomerase
Gohir.D12G027100.1	NEC	EC	2.94068	0.000743461	0.00319523	PF00111	0	0	0	K02639	GO:0051536,GO:0009055	0	AT1G10960	2Fe-2S iron-sulfur cluster binding domain containing protein, expressed; ferredoxin 1	2Fe-2S ferredoxin-like superfamily protein	Fer2	Fer2
Gohir.D05G132200.1	NEC	EC	2.9399	2.63388e-16	1.62948e-14	PF02309	0	0	0	K14484	GO:0005634,GO:0006355	0	AT4G29080	OsIAA21 - Auxin-responsive Aux/IAA gene family member, expressed; phytochrome-associated protein 2	phytochrome-associated protein 2	AUX_IAA	AUX_IAA
Gohir.A01G022475.1	NEC	EC	2.9398	3.4616e-09	5.45988e-08	PF00902	0	0	0	0	GO:0016021	0	ATMG00570	uncharacterized tatC-like protein ymf16, putative, expressed; Sec-independent periplasmic protein translocase	NA	TatC	TatC
Gohir.A03G092940.1	NEC	EC	2.93893	3.26675e-08	4.15779e-07	0	0	0	0	0	0	0	AT1G48540	leucine-rich repeat family protein, putative, expressed; Outer arm dynein light chain 1 protein	Outer arm dynein light chain 1 protein	LRR_4, LRR_8, LRR_9, TSC22	LRR_4, LRR_8, LRR_9, TSC22
Gohir.A09G196400.1	NEC	EC	2.9369	7.69737e-19	7.13927e-17	PF00892	0	0	0	0	GO:0022857,GO:0016021,GO:0016020	0	AT5G47470	integral membrane protein DUF6 domain containing protein, expressed; Nodulin MtN21 /EamA-like transporter family protein	Nodulin MtN21 /EamA-like transporter family protein	EamA	EamA
Gohir.A13G018500.1	NEC	EC	2.93377	0.0142697	0.0397312	PF08137	0	0	0	0	0	0	AT2G39705	expressed protein; ROTUNDIFOLIA like 8	ROTUNDIFOLIA like 8	DVL	DVL
Gohir.A11G240300.2	NEC	EC	2.9333	9.94822e-06	7.11132e-05	PF03222	0	0	0	0	GO:0005887,GO:0003333,GO:0015801,GO:0015173	0	AT2G33260	tryptophan/tyrosine permease family protein, putative, expressed; Tryptophan/tyrosine permease	Tryptophan/tyrosine permease	Trp_Tyr_perm, Aa_trans	Trp_Tyr_perm, Aa_trans
Gohir.A06G030350.1	NEC	EC	2.93301	0.0243909	0.0617781	0	0	0	0	0	0	0	NA	NA	0	#N/A	#N/A
Gohir.A10G217575.1	NEC	EC	2.93298	0.00357574	0.0124229	PF03107	0	0	0	0	0	0	NA	NA	Cysteine/Histidine-rich C1 domain family protein	C1_2, zf-HC5HC2H_2, Zn_ribbon_17, zf-HC5HC2H, RP854, ESAG1, DUF2304, Lipase	C1_2, zf-HC5HC2H_2, Zn_ribbon_17, zf-HC5HC2H, RP854, ESAG1, DUF2304, Lipase
Gohir.D05G080800.1	NEC	EC	2.93029	2.43076e-05	0.000156412	PF04564	0	6.3.2.19	0	0	GO:0016567,GO:0004842	0	AT2G35930	U-box domain-containing protein, putative, expressed; plant U-box 23	plant U-box 23	U-box, zf-Nse, MOR2-PAG1_C, Rcd1, zf-NOSIP, zf-C3HC4_4, zf-RING_UBOX	U-box, zf-Nse, MOR2-PAG1_C, Rcd1, zf-NOSIP, zf-C3HC4_4, zf-RING_UBOX
Gohir.D05G317400.1	NEC	EC	2.92858	0.000185786	0.00094629	0	0	0	SignalP-noTM	0	0	0	NA	NA	0	#N/A	#N/A
Gohir.D07G080100.1	NEC	EC	2.92826	3.01979e-11	7.38785e-10	PF14368	0	0	SignalP-TM	0	0	0	NA	NA	Bifunctional inhibitor/lipid-transfer protein/seed storage 2S albumin superfamily protein	Tryp_alpha_amyl, LTP_2	Tryp_alpha_amyl, LTP_2
Gohir.D13G083600.1	NEC	EC	2.92798	4.13079e-05	0.000251053	PF00067	KOG0157	0	0	K12640	GO:0005506,GO:0055114,GO:0016705,GO:0020037	0	AT3G30180	cytochrome P450, putative, expressed; brassinosteroid-6-oxidase 2	brassinosteroid-6-oxidase 2	p450	p450
Gohir.D07G145500.1	NEC	EC	2.92779	1.02146e-14	4.82182e-13	PF13639	KOG2930	0	0	0	0	0	AT2G46160	RING-H2 finger protein ATL2M, putative, expressed; RING/U-box superfamily protein	RING/U-box superfamily protein	zf-RING_2, zf-rbx1, zf-RING_11, zf-C3HC4_2, zf-C3HC4, zf-RING_5, zf-ANAPC11, zf-C3HC4_3, zf-RING_UBOX, RINGv, Zn_ribbon_17, Prok-RING_4, zf-P11, FANCL_C, zf-RING_4	zf-RING_2, zf-rbx1, zf-RING_11, zf-C3HC4_2, zf-C3HC4, zf-RING_5, zf-ANAPC11, zf-C3HC4_3, z
Gohir.D12G202300.1	NEC	EC	2.92522	0.00010515	0.000575009	PF00168,PF02893,PF16016	KOG1032	0	0	0	0	0	AT5G50170	GRAM and C2 domains containing protein, putative, expressed; C2 calcium/lipid-binding and GRAM domain containing protein	C2 calcium/lipid-binding and GRAM domain containing protein	VASt, C2, GRAM	VASt, C2, GRAM
Gohir.A10G242500.1	NEC	EC	2.92398	8.37871e-16	4.72788e-14	PF12515,PF00689,PF00122,PF00690,PF00702	KOG0204	3.6.3.8	0	K01537	GO:0005516	0	AT3G57330	calcium-transporting ATPase, plasma membrane-type, putative, expressed; autoinhibited Ca2+-ATPase 11	autoinhibited Ca2+-ATPase 11	Cation_ATPase_C, E1-E2_ATPase, Hydrolase, Cation_ATPase, CaATP_NAI, Cation_ATPase_N, Hydrolase_3, HAD, OAD_gamma	Cation_ATPase_C, E1-E2_ATPase, Hydrolase, Cation_ATPase, CaATP_NAI, Cation_ATPase_N, Hydro
Gohir.D07G036600.1	NEC	EC	2.9237	1.00047e-08	1.42747e-07	PF02298	0	0	SignalP-noTM	0	GO:0009055	0	AT2G25060	plastocyanin-like domain containing protein, putative, expressed; early nodulin-like protein 14	early nodulin-like protein 14	Cu_bind_like	Cu_bind_like
Gohir.A11G283300.1	NEC	EC	2.92258	4.46304e-07	4.41564e-06	PF01221	KOG3430	3.6.4.2	0	K10418	GO:0007017,GO:0030286	0	AT5G20110	dynein light chain type 1 domain containing protein, expressed; Dynein light chain type 1 family protein	Dynein light chain type 1 family protein	Dynein_light	Dynein_light
Gohir.D09G159100.2	NEC	EC	2.9223	6.64097e-06	4.97416e-05	PF03083	KOG1623	0	0	0	GO:0016021	0	AT5G53190	nodulin MtN3 family protein, putative, expressed; Nodulin MtN3 family protein	Nodulin MtN3 family protein	MtN3_slv, DUF3464, PalH, EamA, DUF4293, SLATT_5	MtN3_slv, DUF3464, PalH, EamA, DUF4293, SLATT_5
Gohir.D10G148500.1	NEC	EC	2.922	1.16587e-11	3.08765e-10	PF03092	0	0	0	0	GO:0006810,GO:0016021	0	AT2G32040	BT1 family protein, putative, expressed; Major facilitator superfamily protein	Major facilitator superfamily protein	BT1, MFS_1, ATG22, ThrE_2	BT1, MFS_1, ATG22, ThrE_2
Gohir.D06G111700.1	NEC	EC	2.9211	6.16108e-15	3.01619e-13	PF14368	0	0	SignalP-noTM	0	0	0	AT1G55260	LTPL82 - Protease inhibitor/seed storage/LTP family protein precursor, expressed; Bifunctional inhibitor/lipid-transfer protein/seed storage 2S albumin superfamily protein	Bifunctional inhibitor/lipid-transfer protein/seed storage 2S albumin superfamily protein	LTP_2, Tryp_alpha_amyl	LTP_2, Tryp_alpha_amyl
Gohir.A09G217800.1	NEC	EC	2.91939	9.99541e-09	1.42658e-07	PF03372	KOG0565	0	0	0	0	0	AT2G32010	type I inositol-1,4,5-trisphosphate 5-phosphatase, putative, expressed; CVP2 like 1	CVP2 like 1	Exo_endo_phos	Exo_endo_phos
Gohir.D06G103600.2	NEC	EC	2.91793	2.12759e-10	4.39733e-09	0	0	0	0	0	0	0	NA	NA	WRKY family transcription factor	MCR_C, IL15	MCR_C, IL15
Gohir.D07G196700.1	NEC	EC	2.91792	1.93702e-08	2.60453e-07	PF00651,PF03000	0	0	0	0	GO:0005515	0	AT5G48130	BTBN16 - Bric-a-Brac, Tramtrack, Broad Complex BTB domain with non-phototropic hypocotyl 3 NPH3 domain, expressed; Phototropic-responsive NPH3 family protein	Phototropic-responsive NPH3 family protein	NPH3, BTB, DUF3342	NPH3, BTB, DUF3342
Gohir.A09G220066.1	NEC	EC	2.91789	5.33035e-09	8.0634e-08	PF00689,PF00702	0	3.6.3.8	0	0	0	0	AT3G22910	calcium-transporting ATPase, plasma membrane-type, putative, expressed; ATPase E1-E2 type family protein / haloacid dehalogenase-like hydrolase family protein	ATPase E1-E2 type family protein / haloacid dehalogenase-like hydrolase family protein	Cation_ATPase_C, Hydrolase, Hydrolase_3, DUF2976	Cation_ATPase_C, Hydrolase, Hydrolase_3, DUF2976
Gohir.D10G231700.1	NEC	EC	2.91778	2.706e-05	0.000172228	PF02535	KOG1558	0	SignalP-TM	K14709	GO:0046873,GO:0016020,GO:0030001,GO:0055085	0	AT2G04032	metal cation transporter, putative, expressed; zinc transporter 7 precursor	zinc transporter 7 precursor	Zip, MIG-14_Wnt-bd, GCSF	Zip, MIG-14_Wnt-bd, GCSF
Gohir.D08G154600.1	NEC	EC	2.91749	5.18609e-13	1.77665e-11	PF03479	0	0	0	0	0	0	AT2G45430	DNA binding protein, putative, expressed; AT-hook motif nuclear-localized protein 22	AT-hook motif nuclear-localized protein 22	DUF296	DUF296
Gohir.D05G134600.1	NEC	EC	2.91658	1.01166e-06	9.18885e-06	PF00657	0	3.1.1.3	SignalP-noTM	0	GO:0016788	0	AT3G16370	GDSL-like lipase/acylhydrolase, putative, expressed; GDSL-like Lipase/Acylhydrolase superfamily protein	GDSL-like Lipase/Acylhydrolase superfamily protein	Lipase_GDSL, DUF4404	Lipase_GDSL, DUF4404
Gohir.A06G081500.1	NEC	EC	2.9165	6.88054e-11	1.56562e-09	0	0	0	SignalP-noTM	0	0	0	AT1G02180	expressed protein; ferredoxin-related	ferredoxin-related	#N/A	#N/A
Gohir.A10G096400.1	NEC	EC	2.91627	1.05111e-06	9.49861e-06	PF03765,PF00650	KOG1471	0	0	0	0	0	AT4G36490	phosphatidylinositol transfer, putative, expressed; SEC14-like 12	SEC14-like 12	CRAL_TRIO, CRAL_TRIO_N	CRAL_TRIO, CRAL_TRIO_N
Gohir.A02G104300.4	NEC	EC	2.91492	0.0434093	0.0993767	PF01595	0	0	0	0	0	0	AT2G14520	CBS domain containing protein, expressed; CBS domain-containing protein with a domain of unknown function (DUF21)	CBS domain-containing protein with a domain of unknown function (DUF21)	DUF21	DUF21
Gohir.D06G186900.1	NEC	EC	2.91427	1.37133e-05	9.43074e-05	PF03106	0	0	0	0	GO:0006355,GO:0003700,GO:0043565	0	AT3G56400	WRKY45, expressed; WRKY DNA-binding protein 70	WRKY DNA-binding protein 70	WRKY, DUF2252, ICAM_N, DUF3958, MCCD1	WRKY, DUF2252, ICAM_N, DUF3958, MCCD1
Gohir.D05G378800.1	NEC	EC	2.91424	0.000773281	0.00330464	0	0	0	0	0	0	0	AT4G05030	heavy metal associated domain containing protein, expressed; Copper transport protein family	Copper transport protein family	#N/A	#N/A
Gohir.D07G229400.1	NEC	EC	2.91177	4.37062e-06	3.40097e-05	PF01277	0	0	0	0	GO:0016021,GO:0012511	0	AT3G01570	oleosin, putative, expressed; Oleosin family protein	Oleosin family protein	Oleosin, DUF1640, DUF3487	Oleosin, DUF1640, DUF3487
Gohir.D09G076100.1	NEC	EC	2.9082	0.0656758	0.138873	0	0	0	0	0	0	0	AT1G79660	expressed protein	0	DUF3285	DUF3285
Gohir.D08G179832.1	NEC	EC	2.90738	2.1751e-14	9.69334e-13	PF00072,PF00249	0	0	0	0	GO:0000160	0	AT4G18020	two-component response regulator, putative, expressed; CheY-like two-component responsive regulator family protein	CheY-like two-component responsive regulator family protein	Myb_DNA-binding, Response_reg	Myb_DNA-binding, Response_reg
Gohir.D02G169800.2	NEC	EC	2.90653	6.39416e-17	4.29505e-15	PF03195	0	0	0	0	0	0	AT1G68510	DUF260 domain containing protein, putative, expressed; LOB domain-containing protein 42	LOB domain-containing protein 42	LOB	LOB
Gohir.A13G163100.2	NEC	EC	2.90585	3.62311e-12	1.05974e-10	PF02365	0	0	0	0	GO:0006355,GO:0003677	0	AT3G04070	No apical meristem protein, putative, expressed; NAC domain containing protein 47	NAC domain containing protein 47	NAM	NAM
Gohir.A10G212900.1	NEC	EC	2.90584	6.6012e-06	4.94531e-05	PF08541,PF08392	0	2.3.1.199	SignalP-noTM	0	GO:0016020,GO:0016747,GO:0006633	K15397	AT5G04530	3-ketoacyl-CoA synthase precursor, putative, expressed; 3-ketoacyl-CoA synthase 19	3-ketoacyl-CoA synthase 19	FAE1_CUT1_RppA, ACP_syn_III_C, Chal_sti_synt_C, ACP_syn_III	FAE1_CUT1_RppA, ACP_syn_III_C, Chal_sti_synt_C, ACP_syn_III
Gohir.A07G205200.3	NEC	EC	2.90419	2.06919e-13	7.6746e-12	PF00076,PF12872,PF12796	KOG4214	0	0	0	GO:0003676	0	NA	NA	Ankyrin repeat family protein	Ank_2, Ank_4, Ank_5, RRM_1, OST-HTH, Ank, Ank_3, zf-C3HC4_3, zf-CCCH_4, zf-CCCH, zf_CCCH_4, RRM_7, Torus, zf-CCCH_2	Ank_2, Ank_4, Ank_5, RRM_1, OST-HTH, Ank, Ank_3, zf-C3HC4_3, zf-CCCH_4, zf-CCCH, zf_CCCH_4
Gohir.A11G030071.1	NEC	EC	2.90417	0.125197	0.231202	0	0	0	0	0	0	0	NA	NA	NA	#N/A	#N/A
Gohir.D03G140001.1	NEC	EC	2.90397	0.000104377	0.000571389	0	0	0	0	0	0	0	AT1G07120	chloroplast unusual positioning protein, putative, expressed	0	NRBF2, HALZ, GIT_CC, DUF29, DivIC, Rootletin, ZapB, HMMR_C, Mod_r, Med10, CENP-F_leu_zip, DUF4600, Lebercilin, Ax_dynein_light, APG6_N, JIP_LZII, Dynactin_p22, YabA, Cnn_1N, Mito_fiss_reg, WXG100, DivIVA, TMPIT, Wbp11, Spc7, FlaC_arch, PRKG1_interact, K-box	NRBF2, HALZ, GIT_CC, DUF29, DivIC, Rootletin, ZapB, HMMR_C, Mod_r, Med10, CENP-F_leu_zip,
Gohir.D11G212700.2	NEC	EC	2.90168	2.24218e-05	0.000145718	0	0	0	0	0	0	0	NA	NA	0	#N/A	#N/A
Gohir.A10G049200.1	NEC	EC	2.9003	0.000489967	0.0022195	PF00069	KOG0201	2.7.11.1	0	K08835	GO:0004672,GO:0006468,GO:0005524	0	AT1G79640	STE_PAK_Ste20_STLK.2 - STE kinases include homologs to sterile 7, sterile 11 and sterile 20 from yeast, expressed; Protein kinase superfamily protein	Protein kinase superfamily protein	Pkinase, Pkinase_Tyr, Pkinase_fungal, Kinase-like, RILP, Haspin_kinase, APH, Seadorna_VP7	Pkinase, Pkinase_Tyr, Pkinase_fungal, Kinase-like, RILP, Haspin_kinase, APH, Seadorna_VP7
Gohir.A11G274700.1	NEC	EC	2.90009	2.15288e-18	1.82222e-16	PF01370	KOG1429	0	0	0	GO:0050662,GO:0003824	0	AT1G09340	3-beta hydroxysteroid dehydrogenase/isomerase family protein, putative, expressed; chloroplast RNA binding	chloroplast RNA binding	Epimerase, GDP_Man_Dehyd, NAD_binding_10, RmlD_sub_bind, adh_short, Glyco_trans_4_4	Epimerase, GDP_Man_Dehyd, NAD_binding_10, RmlD_sub_bind, adh_short, Glyco_trans_4_4
Gohir.A06G069700.1	NEC	EC	2.89846	1.23866e-15	6.75839e-14	PF00249	KOG0048	0	0	K09422	0	0	AT5G57620	MYB family transcription factor, putative, expressed; myb domain protein 36	myb domain protein 36	Myb_DNA-binding, Myb_DNA-bind_6, Myb_DNA-bind_7	Myb_DNA-binding, Myb_DNA-bind_6, Myb_DNA-bind_7
Gohir.D09G131700.1	NEC	EC	2.8977	6.19808e-13	2.08774e-11	0	0	0	0	0	0	0	NA	NA	0	DUF3328, CcmD	DUF3328, CcmD
Gohir.A12G071000.1	NEC	EC	2.89651	2.35763e-05	0.000152215	PF07939	0	0	0	0	0	0	AT4G33985	expressed protein; Protein of unknown function (DUF1685)	Protein of unknown function (DUF1685)	DUF1685	DUF1685
Gohir.A13G042700.1	NEC	EC	2.89636	2.2184e-10	4.56665e-09	PF00201	KOG1192	2.4.1.128	0	0	GO:0016758,GO:0008152	0	AT4G34131	anthocyanin 3-O-beta-glucosyltransferase, putative, expressed; UDP-glucosyl transferase 73B3	UDP-glucosyl transferase 73B3	UDPGT, QueF, Cerato-platanin	UDPGT, QueF, Cerato-platanin
Gohir.D01G081200.1	NEC	EC	2.8959	6.19577e-21	7.8447e-19	0	0	0	0	0	0	0	AT1G79160	expressed protein	0	DUF755, Dehydrin	DUF755, Dehydrin
Gohir.D05G267950.1	NEC	EC	2.89584	0.0308172	0.0749966	0	0	0	0	0	0	0	NA	NA	0	Gag_spuma	Gag_spuma
Gohir.D08G183650.1	NEC	EC	2.8951	0.102029	0.197106	0	0	0	0	0	0	0	NA	NA	NA	#N/A	#N/A
Gohir.A12G135700.2	NEC	EC	2.89407	3.97112e-05	0.000242208	PF00582	0	0	0	0	GO:0006950	0	AT1G11360	universal stress protein domain containing protein, putative, expressed; Adenine nucleotide alpha hydrolases-like superfamily protein	Adenine nucleotide alpha hydrolases-like superfamily protein	Usp	Usp
Gohir.D13G165100.2	NEC	EC	2.89352	1.05883e-15	5.84622e-14	PF03765,PF00650	KOG1470	0	0	0	0	0	AT4G08690	CRAL/TRIO domain containing protein, expressed; Sec14p-like phosphatidylinositol transfer family protein	Sec14p-like phosphatidylinositol transfer family protein	CRAL_TRIO, CRAL_TRIO_N, CRAL_TRIO_2	CRAL_TRIO, CRAL_TRIO_N, CRAL_TRIO_2
Gohir.A10G025000.2	NEC	EC	2.89253	3.47178e-08	4.38973e-07	PF12481	0	0	0	0	0	0	AT4G27450	stem-specific protein TSJT1, putative, expressed; Aluminium induced protein with YGL and LRDR motifs	Aluminium induced protein with YGL and LRDR motifs	DUF3700, GATase_7, GATase_6	DUF3700, GATase_7, GATase_6
Gohir.D06G037700.2	NEC	EC	2.89236	1.4463e-22	2.30481e-20	PF02358	0	3.1.3.12	0	0	GO:0005992,GO:0003824	0	AT1G35910	uncharacterized glycosyl hydrolase Rv2006/MT2062, putative, expressed; Haloacid dehalogenase-like hydrolase (HAD) superfamily protein	Haloacid dehalogenase-like hydrolase (HAD) superfamily protein	Trehalose_PPase	Trehalose_PPase
Gohir.A11G291900.1	NEC	EC	2.89185	6.57694e-08	7.8236e-07	PF04043	0	0	SignalP-noTM	0	GO:0004857	0	AT4G00872	Plant invertase/pectin methylesterase inhibitor superfamily protein	Plant invertase/pectin methylesterase inhibitor superfamily protein	PMEI, Pro-rich_19, DUF4446	PMEI, Pro-rich_19, DUF4446
Gohir.A11G181500.1	NEC	EC	2.89183	0.0210777	0.0548286	PF00257	0	0	0	0	GO:0006950,GO:0009415	0	NA	NA	dehydrin xero 1	Dehydrin	Dehydrin
Gohir.D03G028201.1	NEC	EC	2.89088	0.00038814	0.00180512	PF02984,PF00134	KOG0656	0	0	0	GO:0005634	0	NA	NA	cyclin d5;1	Cyclin_N, Cyclin_C	Cyclin_N, Cyclin_C
Gohir.A11G027500.1	NEC	EC	2.89013	1.62476e-08	2.2215e-07	PF00046,PF04618,PF02183	KOG0483	0	0	0	GO:0006355,GO:0003700,GO:0003677,GO:0043565,GO:0005634	0	AT4G16780	homeobox associated leucine zipper, putative, expressed; homeobox protein 2	Homeobox-leucine zipper protein 4 (HB-4) / HD-ZIP protein	HD-ZIP_N, Homeodomain, HALZ, Homeobox_KN, Homez, NRBF2, Rpr2	HD-ZIP_N, Homeodomain, HALZ, Homeobox_KN, Homez, NRBF2, Rpr2
Gohir.D04G042600.2	NEC	EC	2.88922	1.03645e-09	1.8373e-08	PF07786	0	2.3.1.78	0	0	0	0	AT5G47900	heparan-alpha-glucosaminide N-acetyltransferase, putative, expressed; Protein of unknown function (DUF1624)	Protein of unknown function (DUF1624)	DUF1624, DUF5009, DUF418, Acyl_transf_3	DUF1624, DUF5009, DUF418, Acyl_transf_3
Gohir.A11G023500.1	NEC	EC	2.8892	1.07788e-15	5.9443e-14	PF13499,PF00069	KOG0032	2.7.11.1	0	0	GO:0005524,GO:0005509,GO:0006468,GO:0004672	0	AT4G23650	CAMK_CAMK_like.9 - CAMK includes calcium/calmodulin depedent protein kinases, expressed; calcium-dependent protein kinase 6	calcium-dependent protein kinase 6	Pkinase, EF-hand_1, Pkinase_Tyr, EF-hand_7, EF-hand_6, EF-hand_8, EF-hand_5, Kinase-like, EF-hand_4, EF-hand_9, SPARC_Ca_bdg, Kdo, EFhand_Ca_insen, Gp-FAR-1, APH, DUF2087, PHB_acc_N	Pkinase, EF-hand_1, Pkinase_Tyr, EF-hand_7, EF-hand_6, EF-hand_8, EF-hand_5, Kinase-like,
Gohir.A13G036700.1	NEC	EC	2.88866	4.76996e-15	2.37031e-13	PF02362	0	0	0	0	GO:0003677	0	NA	NA	AP2/B3-like transcriptional factor family protein	B3	B3
Gohir.A11G245500.1	NEC	EC	2.88785	2.89613e-05	0.000182898	PF04770	0	0	0	0	0	0	NA	NA	homeobox protein 31	ZF-HD_dimer, DUF866, WVELL	ZF-HD_dimer, DUF866, WVELL
Gohir.D13G040200.1	NEC	EC	2.88708	7.49032e-05	0.000425778	PF00010	0	0	0	0	GO:0046983	0	AT1G49770	helix-loop-helix DNA-binding domain containing protein, expressed; basic helix-loop-helix (bHLH) DNA-binding superfamily protein	basic helix-loop-helix (bHLH) DNA-binding superfamily protein	HLH, Mitofilin	HLH, Mitofilin
Gohir.A13G029250.1	NEC	EC	2.88575	0.0393328	0.0918275	0	0	0	SignalP-noTM	0	0	0	NA	NA	0	ESF1	ESF1
Gohir.A05G322900.1	NEC	EC	2.88507	0.000414647	0.00191491	PF02458	0	0	0	0	GO:0016747	0	AT3G23840	transferase family protein, putative, expressed; HXXXD-type acyl-transferase family protein	HXXXD-type acyl-transferase family protein	Transferase	Transferase
Gohir.D05G043700.1	NEC	EC	2.88497	0.000544542	0.00243851	PF02535	KOG1558	0	0	K14709	GO:0030001,GO:0046873,GO:0016020,GO:0055085	0	AT1G60960	metal cation transporter, putative, expressed; iron regulated transporter 3	zinc transporter 4 precursor	Zip	Zip
Gohir.A08G208900.2	NEC	EC	2.88454	0.00166845	0.00646427	PF00403	KOG1603	0	0	0	GO:0030001,GO:0046872	0	AT1G56210	pro-resilin precursor, putative, expressed; Heavy metal transport/detoxification superfamily protein	Heavy metal transport/detoxification superfamily protein	HMA, PI3K_rbd	HMA, PI3K_rbd
Gohir.A07G016900.1	NEC	EC	2.88381	2.20598e-09	3.63059e-08	PF02519	0	0	0	K14488	GO:0009733	0	AT3G43120	OsSAUR38 - Auxin-responsive SAUR gene family member, expressed; SAUR-like auxin-responsive protein family	SAUR-like auxin-responsive protein family	Auxin_inducible	Auxin_inducible
Gohir.A07G155500.1	NEC	EC	2.88258	5.48555e-07	5.30465e-06	PF00108,PF02803	KOG1389	2.3.1.16	0	K07513	GO:0016747,GO:0008152	0	AT2G33150	3-ketoacyl-CoA thiolase, peroxisomal precursor, putative, expressed; peroxisomal 3-ketoacyl-CoA thiolase 3	peroxisomal 3-ketoacyl-CoA thiolase 3	Thiolase_N, Thiolase_C, ACP_syn_III_C, zf-CCCH_3	Thiolase_N, Thiolase_C, ACP_syn_III_C, zf-CCCH_3
Gohir.A10G098400.1	NEC	EC	2.88138	3.66715e-12	1.07126e-10	0	0	0	0	0	0	0	NA	NA	0	#N/A	#N/A
Gohir.A10G220600.2	NEC	EC	2.87957	2.31616e-08	3.06351e-07	PF03514	0	0	0	0	0	0	AT2G37650	SCARECROW, putative, expressed; GRAS family transcription factor	GRAS family transcription factor	GRAS	GRAS
Gohir.A11G123000.1	NEC	EC	2.87876	2.76421e-05	0.000175595	PF02298	0	0	SignalP-noTM	0	GO:0009055	0	AT5G26330	plastocyanin-like domain containing protein, putative, expressed; Cupredoxin superfamily protein	Cupredoxin superfamily protein	Cu_bind_like, SoxE	Cu_bind_like, SoxE
Gohir.A02G016000.2	NEC	EC	2.87859	0.00746769	0.0231215	PF12643	0	3.6.1.12	0	0	GO:0047429,GO:0009143	K16904	AT3G25400	MazG nucleotide pyrophosphohydrolase domain containing protein, expressed	0	MazG-like, MazG, Peptidase_S78_2	MazG-like, MazG, Peptidase_S78_2
Gohir.D12G191066.1	NEC	EC	2.87833	3.81032e-08	4.77339e-07	PF05191,PF00406	KOG3078	2.7.4.3	0	0	GO:0019205,GO:0006139,GO:0004017,GO:0005524	0	AT5G63400	adenylate kinase, putative, expressed; adenylate kinase 1	adenylate kinase 1	ADK, AAA_17, ADK_lid, AAA_33, Hydin_ADK, AAA_18, RuvB_N, Zeta_toxin	ADK, AAA_17, ADK_lid, AAA_33, Hydin_ADK, AAA_18, RuvB_N, Zeta_toxin
Gohir.A12G164800.1	NEC	EC	2.87744	4.24977e-05	0.000257538	PF00445	KOG1642	3.1.27.1	SignalP-noTM	K01166	GO:0033897,GO:0003723	0	AT2G02990	ribonuclease T2 family domain containing protein, expressed; ribonuclease 1	ribonuclease 1	Ribonuclease_T2	Ribonuclease_T2
Gohir.A10G100900.1	NEC	EC	2.87732	2.5353e-09	4.12268e-08	PF01145	KOG2620	0	0	0	0	0	AT5G62740	hypersensitive-induced response protein, putative, expressed; SPFH/Band 7/PHB domain-containing membrane-associated protein family	SPFH/Band 7/PHB domain-containing membrane-associated protein family	Band_7, Band_7_1, DUF3662	Band_7, Band_7_1, DUF3662
Gohir.D06G048400.1	NEC	EC	2.87684	9.70871e-09	1.39039e-07	PF16983	0	0	0	0	GO:0015689,GO:0015098	0	AT2G25680	sulfate transporter, putative, expressed; molybdate transporter 1	molybdate transporter 1	MFS_MOT1, BenE	MFS_MOT1, BenE
Gohir.D08G087800.1	NEC	EC	2.87674	0.0455401	0.103318	0	0	0	0	0	0	0	NA	NA	0	#N/A	#N/A
Gohir.A10G197600.1	NEC	EC	2.87475	7.8262e-09	1.14167e-07	PF13906,PF13520	KOG1286	0	0	0	GO:0003333,GO:0016020,GO:0015171	0	AT3G10600	amino acid permease family protein, putative, expressed; cationic amino acid transporter 7	cationic amino acid transporter 7	AA_permease_2, AA_permease, AA_permease_C	AA_permease_2, AA_permease, AA_permease_C
Gohir.D08G173600.1	NEC	EC	2.87462	0.0222826	0.0574134	0	0	0	SignalP-noTM	0	0	0	NA	NA	0	#N/A	#N/A
Gohir.A10G032900.1	NEC	EC	2.87272	6.74057e-09	9.97146e-08	PF00657	0	3.1.1.3	SignalP-noTM	0	GO:0016788	0	AT1G29660	GDSL-like lipase/acylhydrolase, putative, expressed; GDSL-like Lipase/Acylhydrolase superfamily protein	GDSL-like Lipase/Acylhydrolase superfamily protein	Lipase_GDSL	Lipase_GDSL
Gohir.D05G094900.2	NEC	EC	2.87244	1.19149e-06	1.06362e-05	PF03514	0	0	0	0	0	0	AT1G07530	SCARECROW, putative, expressed; SCARECROW-like 14	SCARECROW-like 14	GRAS	GRAS
Gohir.A13G071600.1	NEC	EC	2.86896	2.73811e-06	2.24519e-05	PF00571	KOG1764	0	0	0	0	0	AT1G69800	CBS domain containing membrane protein, putative, expressed; Cystathionine beta-synthase (CBS) protein	Cystathionine beta-synthase (CBS) protein	CBS	CBS
Gohir.A08G086086.1	NEC	EC	2.86793	0.000706214	0.00305075	0	0	0	0	0	0	0	NA	NA	NA	#N/A	#N/A
Gohir.D09G142300.1	NEC	EC	2.86788	1.91292e-07	2.06406e-06	PF00708	KOG3360	3.6.1.7	0	K01512	0	0	AT5G03370	acylphosphatase, putative, expressed; acylphosphatase family	acylphosphatase family	Acylphosphatase	Acylphosphatase
Gohir.A06G167100.1	NEC	EC	2.86608	4.86727e-10	9.27188e-09	PF03470,PF03469,PF03468	0	0	0	0	GO:0031047	0	AT3G48670	transcription factor X1, putative, expressed; XH/XS domain-containing protein	XH/XS domain-containing protein	XH, XS, zf-XS, Octopine_DH	XH, XS, zf-XS, Octopine_DH
Gohir.D02G203199.1	NEC	EC	2.86529	0.0187264	0.0497798	0	0	0	0	0	0	0	AT3G19660	0	0	Chordopox_A30L	Chordopox_A30L
Gohir.A13G078200.2	NEC	EC	2.86354	5.68912e-06	4.31578e-05	PF02171,PF08699,PF02170,PF16486	KOG1041	0	0	0	GO:0003676,GO:0005515	0	AT1G69440	AGO7, putative, expressed; Argonaute family protein	Argonaute family protein	Piwi, ArgoN, PAZ, ArgoL1, ArgoL2, ArgoMid, TBCC_N, DUF3734	Piwi, ArgoN, PAZ, ArgoL1, ArgoL2, ArgoMid, TBCC_N, DUF3734
Gohir.A05G061800.1	NEC	EC	2.86128	9.43032e-05	0.000522871	PF14541,PF14543	KOG1339	3.4.23.12	SignalP-TM	0	GO:0006508,GO:0004190	0	AT5G10770	aspartic proteinase nepenthesin-2 precursor, putative, expressed; Eukaryotic aspartyl protease family protein	Eukaryotic aspartyl protease family protein	TAXi_N, TAXi_C, Asp	TAXi_N, TAXi_C, Asp
Gohir.A09G173700.1	NEC	EC	2.86097	2.80064e-07	2.90655e-06	PF00249	0	0	0	0	0	0	AT5G16560	KANADI1, putative, expressed; Homeodomain-like superfamily protein	Homeodomain-like superfamily protein	Myb_DNA-binding	Myb_DNA-binding
Gohir.A11G296100.1	NEC	EC	2.86091	3.62067e-09	5.68361e-08	PF00011	0	0	0	0	0	0	AT1G54850	HSP20-like chaperones superfamily protein	HSP20-like chaperones superfamily protein	HSP20, CS	HSP20, CS
Gohir.A05G382100.1	NEC	EC	2.85932	2.74276e-14	1.19579e-12	PF00171	KOG2456	1.2.1.3	0	K00128	GO:0055114,GO:0008152,GO:0016491	0	AT4G34240	aldehyde dehydrogenase, putative, expressed; aldehyde dehydrogenase 3I1	aldehyde dehydrogenase 3I1	Aldedh, DUF1133, RRM_Rrp7, TFIIE_alpha, DUF3978	Aldedh, DUF1133, RRM_Rrp7, TFIIE_alpha, DUF3978
Gohir.D11G155100.1	NEC	EC	2.85884	1.65192e-07	1.8052e-06	PF16719	0	0	0	0	GO:0003682	0	NA	NA	0	SAWADEE	SAWADEE
Gohir.A03G000400.2	NEC	EC	2.85812	1.57522e-09	2.67054e-08	PF00443	KOG1868	3.4.19.12	0	0	GO:0016579,GO:0036459	0	AT4G17895	ubiquitin carboxyl-terminal hydrolase domain containing protein, expressed; ubiquitin-specific protease 20	ubiquitin-specific protease 20	UCH, UCH_1, Peptidase_C98	UCH, UCH_1, Peptidase_C98
Gohir.D05G192500.1	NEC	EC	2.85619	2.58854e-06	2.13886e-05	PF14008,PF16656,PF00149	KOG1378	3.1.3.41	SignalP-noTM	0	GO:0016787,GO:0003993,GO:0046872	0	AT2G16430	purple acid phosphatase precursor, putative, expressed; purple acid phosphatase 10	purple acid phosphatase 10	Metallophos, Pur_ac_phosph_N, Metallophos_C, DUF1481	Metallophos, Pur_ac_phosph_N, Metallophos_C, DUF1481
Gohir.A03G152700.4	NEC	EC	2.85566	0.00799906	0.0244927	PF00854	KOG1237	0	0	0	GO:0016020,GO:0005215,GO:0006810	0	AT5G13400	peptide transporter PTR2, putative, expressed; Major facilitator superfamily protein	Major facilitator superfamily protein	PTR2, MerE, DUF2207	PTR2, MerE, DUF2207
Gohir.D05G061366.1	NEC	EC	2.85531	8.32696e-05	0.00046821	PF02181	0	0	0	0	0	0	AT2G25050	formin, putative, expressed; Actin-binding FH2 (Formin Homology) protein	Actin-binding FH2 (Formin Homology) protein	FH2	FH2
Gohir.A03G051100.1	NEC	EC	2.85472	4.19819e-05	0.00025468	PF05030	0	0	0	0	GO:0003713	0	AT4G00850	SSXT protein, putative, expressed; GRF1-interacting factor 3	GRF1-interacting factor 3	SSXT, Elf4, GreA_GreB_N, LemA	SSXT, Elf4, GreA_GreB_N, LemA
Gohir.A11G094700.1	NEC	EC	2.85351	4.93188e-16	2.89977e-14	PF06376	0	0	SignalP-TM	0	0	0	NA	NA	arabinogalactan protein 20	AGP, DUF4220, DUF4044	AGP, DUF4220, DUF4044
Gohir.D07G126100.1	NEC	EC	2.85266	9.95364e-11	2.19778e-09	PF14368	0	0	SignalP-noTM	0	0	0	AT4G30880	LTPL35 - Protease inhibitor/seed storage/LTP family protein precursor, putative; Bifunctional inhibitor/lipid-transfer protein/seed storage 2S albumin superfamily protein	Bifunctional inhibitor/lipid-transfer protein/seed storage 2S albumin superfamily protein	LTP_2, Tryp_alpha_amyl	LTP_2, Tryp_alpha_amyl
Gohir.A05G059200.1	NEC	EC	2.85254	0.00017552	0.000899974	PF03106	0	0	0	0	GO:0043565,GO:0003700,GO:0006355	0	AT1G80840	WRKY71, expressed; WRKY DNA-binding protein 40	WRKY DNA-binding protein 40	WRKY, CENP-F_leu_zip	WRKY, CENP-F_leu_zip
Gohir.D05G158950.1	NEC	EC	2.85186	7.30608e-07	6.86546e-06	PF00657	0	3.1.1.49	SignalP-TM	0	GO:0016788	0	AT1G28600	GDSL-like lipase/acylhydrolase, putative, expressed; GDSL-like Lipase/Acylhydrolase superfamily protein	GDSL-like Lipase/Acylhydrolase superfamily protein	Lipase_GDSL	Lipase_GDSL
Gohir.A11G063500.1	NEC	EC	2.85169	3.79907e-14	1.60779e-12	PF00010	0	0	0	0	GO:0046983	0	AT3G26744	inducer of CBF expression 1, putative, expressed; basic helix-loop-helix (bHLH) DNA-binding superfamily protein	basic helix-loop-helix (bHLH) DNA-binding superfamily protein	HLH	HLH
Gohir.A05G207300.1	NEC	EC	2.85076	4.9266e-06	3.78895e-05	PF00806	KOG2049	0	0	0	GO:0003723	0	NA	NA	pumilio 12	PUF, CPL, HrpB1_HrpK	PUF, CPL, HrpB1_HrpK
Gohir.D08G121700.1	NEC	EC	2.84901	0.000582176	0.00258177	PF03171,PF14226	KOG0143	1.14.11.9	0	0	GO:0055114,GO:0016491	0	AT4G10490	naringenin,2-oxoglutarate 3-dioxygenase, putative, expressed; 2-oxoglutarate (2OG) and Fe(II)-dependent oxygenase superfamily protein	2-oxoglutarate (2OG) and Fe(II)-dependent oxygenase superfamily protein	2OG-FeII_Oxy, DIOX_N	2OG-FeII_Oxy, DIOX_N
Gohir.A09G163500.1	NEC	EC	2.84892	2.68704e-10	5.40848e-09	PF00854	KOG1237	3.6.3.43	0	K14638	GO:0016020,GO:0006810,GO:0005215	0	AT3G54140	peptide transporter PTR2, putative, expressed; peptide transporter 1	peptide transporter 1	PTR2, MFS_1	PTR2, MFS_1
Gohir.D11G232100.1	NEC	EC	2.84746	2.74395e-08	3.57813e-07	PF13417,PF00043	KOG0406	2.5.1.18	0	K00799	GO:0005515	0	AT1G10370	glutathione S-transferase, putative, expressed; Glutathione S-transferase family protein	Glutathione S-transferase family protein	GST_N_3, GST_N, GST_N_2, GST_C_2, GST_C, GST_N_4	GST_N_3, GST_N, GST_N_2, GST_C_2, GST_C, GST_N_4
Gohir.D12G047766.1	NEC	EC	2.84729	1.32876e-08	1.84905e-07	PF13639	0	0	0	0	0	0	NA	NA	RING/U-box superfamily protein	zf-RING_2, zf-RING_11, zf-C3HC4_2, zf-rbx1, zf-C3HC4, zf-ANAPC11, zf-RING_5, Prok-RING_1, zf-C3HC4_3, FANCL_C, zf-RING_UBOX, Prok-RING_4, zf-RING_4, Zn_ribbon_17, zf-RING-like, SR-25, RINGv, zf-C3H2C3	zf-RING_2, zf-RING_11, zf-C3HC4_2, zf-rbx1, zf-C3HC4, zf-ANAPC11, zf-RING_5, Prok-RING_1,
Gohir.A06G002200.1	NEC	EC	2.84596	4.74201e-11	1.11445e-09	PF13920	KOG1100	0	0	K19042	0	0	NA	NA	SBP (S-ribonuclease binding protein) family protein	zf-C3HC4_3, MatP_C, Jas, ADIP, Connexin40_C	zf-C3HC4_3, MatP_C, Jas, ADIP, Connexin40_C
Gohir.D10G137832.1	NEC	EC	2.84594	3.70325e-06	2.93252e-05	0	0	2.1.1.56	0	0	0	0	NA	NA	S-adenosyl-L-methionine-dependent methyltransferases superfamily protein	Pox_MCEL	Pox_MCEL
Gohir.D05G160350.1	NEC	EC	2.84548	2.08361e-13	7.71568e-12	PF00847	0	0	0	0	GO:0003700,GO:0006355	0	AT3G23240	AP2 domain containing protein, expressed; ethylene response factor 1	ethylene responsive element binding factor 2	AP2, CAML	AP2, CAML
Gohir.D05G173600.2	NEC	EC	2.84483	0.0431975	0.0989998	PF04520	0	0	0	0	0	0	AT4G21970	DUF584 domain containing protein, putative, expressed; Protein of unknown function, DUF584	Protein of unknown function, DUF584	Senescence_reg, PBP1_TM	Senescence_reg, PBP1_TM
Gohir.A03G009600.1	NEC	EC	2.84448	2.10905e-06	1.78251e-05	PF04640	0	0	0	0	0	0	AT3G60670	zinc-binding protein, putative, expressed; PLATZ transcription factor family protein	PLATZ transcription factor family protein	PLATZ, Ecl1, zf-B_box	PLATZ, Ecl1, zf-B_box
Gohir.A03G213500.1	NEC	EC	2.84355	1.06605e-05	7.54579e-05	PF00319	KOG0014	0	0	0	GO:0003677,GO:0046983	0	AT5G60440	OsMADS75 - MADS-box family gene with M-alpha type-box, expressed; AGAMOUS-like 62	AGAMOUS-like 62	SRF-TF, TMPIT, LD_cluster3, Iron_permease, KIP1	SRF-TF, TMPIT, LD_cluster3, Iron_permease, KIP1
Gohir.A03G159100.1	NEC	EC	2.84316	0.0219902	0.0567677	0	0	0	0	0	0	0	AT1G52855	expressed protein	0	zf-NADH-PPase, zinc_ribbon_2, zf-ribbon_3, zf-LITAF-like	zf-NADH-PPase, zinc_ribbon_2, zf-ribbon_3, zf-LITAF-like
Gohir.A07G203500.1	NEC	EC	2.84297	0.0206038	0.0538321	0	0	0	0	0	0	0	NA	NA	0	SKA2, HTH_Tnp_Mu_1, Baculo_VP1054	SKA2, HTH_Tnp_Mu_1, Baculo_VP1054
Gohir.A09G235200.1	NEC	EC	2.8428	0.0334206	0.0802172	PF02466	0	0	0	0	0	0	AT4G16160	mitochondrial import inner membrane translocase subunit Tim17, putative, expressed; Mitochondrial import inner membrane translocase subunit Tim17/Tim22/Tim23 family protein	Mitochondrial import inner membrane translocase subunit Tim17/Tim22/Tim23 family protein	Tim17	Tim17
Gohir.A01G222600.1	NEC	EC	2.84172	0.000114236	0.000618329	PF00022	KOG0676	0	0	K10355	0	0	AT2G37620	actin, putative, expressed; actin 1	actin 1	Actin, Methyltransf_29	Actin, Methyltransf_29
Gohir.A03G055700.1	NEC	EC	2.84068	4.62156e-20	5.0974e-18	PF00106	KOG1208	1.1.1.208	0	0	0	0	AT5G51030	oxidoreductase, short chain dehydrogenase/reductase family domain containing protein, expressed; NAD(P)-binding Rossmann-fold superfamily protein	NAD(P)-binding Rossmann-fold superfamily protein	adh_short, adh_short_C2, KR, Epimerase, CDPS, NAD_binding_10	adh_short, adh_short_C2, KR, Epimerase, CDPS, NAD_binding_10
Gohir.D09G228400.1	NEC	EC	2.84047	1.13051e-05	7.94728e-05	PF01657	0	0	SignalP-noTM	0	0	0	AT1G04520	cysteine-rich repeat secretory protein precursor, putative, expressed; plasmodesmata-located protein 2	plasmodesmata-located protein 2	Stress-antifung	Stress-antifung
Gohir.D10G089800.1	NEC	EC	2.84002	1.49966e-10	3.1997e-09	0	0	0	0	0	0	0	NA	NA	0	#N/A	#N/A
Gohir.A11G035600.1	NEC	EC	2.83976	4.05147e-11	9.67121e-10	PF01490	KOG1303	0	0	0	0	0	AT1G24400	amino acid transporter, putative, expressed; lysine histidine transporter 2	lysine histidine transporter 1	Aa_trans, Trp_Tyr_perm	Aa_trans, Trp_Tyr_perm
Gohir.D01G172400.1	NEC	EC	2.83718	0.000231231	0.00114892	PF04535	0	0	0	0	0	0	AT1G49405	membrane associated DUF588 domain containing protein, putative, expressed; Uncharacterised protein family (UPF0497)	Uncharacterised protein family (UPF0497)	DUF588, MARVEL	DUF588, MARVEL
Gohir.D11G081000.1	NEC	EC	2.83715	1.16101e-20	1.3793e-18	PF04618,PF02183,PF00046	KOG0483	0	0	K09338	GO:0043565,GO:0005634,GO:0006355,GO:0003700,GO:0003677	0	AT3G60390	homeobox associated leucine zipper, putative, expressed; homeobox-leucine zipper protein 3	homeobox-leucine zipper protein 3	HD-ZIP_N, Homeodomain, HALZ, Homeobox_KN, NRBF2, YabA, CHDCT2	HD-ZIP_N, Homeodomain, HALZ, Homeobox_KN, NRBF2, YabA, CHDCT2
Gohir.A05G177600.1	NEC	EC	2.83593	7.63007e-15	3.69232e-13	PF02365	0	0	0	0	GO:0003677,GO:0006355	0	AT1G76420	CUP-SHAPED COTYLEDON3, putative, expressed; NAC (No Apical Meristem) domain transcriptional regulator superfamily protein	NAC (No Apical Meristem) domain transcriptional regulator superfamily protein	NAM	NAM
Gohir.D09G156600.2	NEC	EC	2.83528	1.52933e-11	3.96168e-10	0	0	0	0	0	0	0	AT5G02020	expressed protein	0	Nucleoporin_FG	Nucleoporin_FG
Gohir.D09G028000.1	NEC	EC	2.83497	9.85043e-13	3.18787e-11	PF00067	KOG0157	0	0	0	GO:0020037,GO:0016705,GO:0005506,GO:0055114	0	AT4G39490	cytochrome P450 protein, putative, expressed; cytochrome P450, family 96, subfamily A, polypeptide 10	cytochrome P450, family 96, subfamily A, polypeptide 10	p450	p450
Gohir.D07G025500.1	NEC	EC	2.83281	2.48345e-07	2.60723e-06	PF08246,PF00112	KOG1542	3.4.22.15	SignalP-noTM	0	GO:0006508,GO:0008234	0	AT4G39090	cysteine proteinase 1 precursor, putative, expressed; Papain family cysteine protease	Papain family cysteine protease	Peptidase_C1, Inhibitor_I29, Peptidase_C1_2	Peptidase_C1, Inhibitor_I29, Peptidase_C1_2
Gohir.D10G058200.1	NEC	EC	2.83155	0.000525698	0.0023626	PF00642,PF02037	0	3.6.4.12	0	0	GO:0046872	0	NA	NA	SAP domain-containing protein	SAP, zf-CCCH_4, zf-CCCH, Torus, zf_CCCH_4, zf-CCCH_2	SAP, zf-CCCH_4, zf-CCCH, Torus, zf_CCCH_4, zf-CCCH_2
Gohir.A04G067900.1	NEC	EC	2.83053	7.94004e-10	1.45785e-08	PF00658,PF00076	KOG0123	0	0	K13126	GO:0003723,GO:0003676	0	AT2G36660	polyadenylate-binding protein, putative, expressed; poly(A) binding protein 7	poly(A) binding protein 7	RRM_1, PABP, RRM_occluded, RRM_3, Nup35_RRM_2, RRM_7, SET_assoc, PHM7_cyt, DUF5526, DUF4651, OB_RNB, GNAT_acetyltran, TC1	RRM_1, PABP, RRM_occluded, RRM_3, Nup35_RRM_2, RRM_7, SET_assoc, PHM7_cyt, DUF5526, DUF465
Gohir.A08G100400.1	NEC	EC	2.82991	0.0492519	0.110187	0	0	0	0	0	0	0	NA	NA	0	#N/A	#N/A
Gohir.D02G185600.2	NEC	EC	2.82947	2.02191e-16	1.26785e-14	PF03321	0	0	0	K14487	0	0	AT5G54510	OsGH3.1 - Probable indole-3-acetic acid-amido synthetase, expressed; Auxin-responsive GH3 family protein	Auxin-responsive GH3 family protein	GH3, Imm63, GNAT_acetyltr_2	GH3, Imm63, GNAT_acetyltr_2
Gohir.A09G127200.1	NEC	EC	2.82885	1.49819e-06	1.30637e-05	PF14379,PF00249	0	0	0	0	0	0	NA	NA	myb-like HTH transcriptional regulator family protein	Myb_CC_LHEQLE, Myb_DNA-binding	Myb_CC_LHEQLE, Myb_DNA-binding
Gohir.A09G152500.1	NEC	EC	2.82848	0.00683111	0.0214451	0	0	0	SignalP-noTM	0	0	0	NA	NA	0	Zip, PP_M1	Zip, PP_M1
Gohir.A10G068500.3	NEC	EC	2.82725	7.80103e-05	0.000441756	PF03094	0	0	SignalP-noTM	0	GO:0016021,GO:0006952	0	AT4G24250	MLO domain containing protein, putative, expressed; Seven transmembrane MLO family protein	Seven transmembrane MLO family protein	Mlo, FAM165, Comm	Mlo, FAM165, Comm
Gohir.D07G192800.1	NEC	EC	2.82617	1.74823e-13	6.56852e-12	PF00636	0	3.1.26.3	0	0	GO:0006396,GO:0004525	0	AT4G15417	endoribonuclease Dicer, putative, expressed; RNAse II-like 1	RNAse II-like 1	Ribonuclease_3, Ribonucleas_3_3, dsrm	Ribonuclease_3, Ribonucleas_3_3, dsrm
Gohir.D09G042800.2	NEC	EC	2.82578	0.0636811	0.135489	PF00403	KOG1603	0	0	0	GO:0046872,GO:0030001	0	AT5G23760	heavy-metal-associated domain-containing protein, putative, expressed; Copper transport protein family	Copper transport protein family	HMA, Staphopain_pro, Syja_N, Cytomega_UL84, U1snRNP70_N	HMA, Staphopain_pro, Syja_N, Cytomega_UL84, U1snRNP70_N
Gohir.D09G231850.1	NEC	EC	2.8236	0.0190361	0.0504435	0	0	0	0	0	0	0	NA	NA	NA	#N/A	#N/A
Gohir.A06G034575.1	NEC	EC	2.82342	3.04951e-08	3.92454e-07	PF12937	0	0	0	0	GO:0005515	0	AT4G08980	OsFBX192 - F-box domain containing protein, expressed; F-BOX WITH WD-40 2	F-BOX WITH WD-40 2	F-box-like, F-box, Dimerisation	F-box-like, F-box, Dimerisation
Gohir.D04G169900.1	NEC	EC	2.82224	1.43962e-06	1.26089e-05	PF10250	0	0	0	0	0	0	AT1G20550	growth regulator related protein, putative, expressed; O-fucosyltransferase family protein	O-fucosyltransferase family protein	O-FucT	O-FucT
Gohir.D01G117100.4	NEC	EC	2.82146	1.75065e-19	1.80152e-17	PF14389,PF00169,PF00620	KOG2710	0	0	0	GO:0007165	0	AT4G24580	pleckstrin homology domain-containing protein, putative, expressed; Rho GTPase activation protein (RhoGAP) with PH domain	Rho GTPase activation protein (RhoGAP) with PH domain	RhoGAP, Lzipper-MIP1, PH, PH_11, Unstab_antitox	RhoGAP, Lzipper-MIP1, PH, PH_11, Unstab_antitox
Gohir.D07G159900.1	NEC	EC	2.82129	0.000912618	0.00382269	PF00168,PF08372	0	0	0	0	0	0	AT1G04150	anthranilate phosphoribosyltransferase, putative, expressed; C2 calcium/lipid-binding plant phosphoribosyltransferase family protein	C2 calcium/lipid-binding plant phosphoribosyltransferase family protein	PRT_C, C2, DUF639, UPF0014, DUF3292	PRT_C, C2, DUF639, UPF0014, DUF3292
Gohir.D06G125400.1	NEC	EC	2.82103	9.10374e-14	3.61133e-12	PF07714,PF01657	KOG1187	2.7.11.1	SignalP-noTM	0	GO:0006468,GO:0004672	0	AT4G38830	TKL_IRAK_DUF26-lc.12 - DUF26 kinases have homology to DUF26 containing loci, expressed; cysteine-rich RLK (RECEPTOR-like protein kinase) 26	cysteine-rich RLK (RECEPTOR-like protein kinase) 26	Pkinase_Tyr, Pkinase, Stress-antifung, DUF3403, APH, TMEM154, Haspin_kinase, Pkinase_fungal, TssO	Pkinase_Tyr, Pkinase, Stress-antifung, DUF3403, APH, TMEM154, Haspin_kinase, Pkinase_funga
Gohir.D06G100700.1	NEC	EC	2.82088	1.11767e-09	1.96395e-08	PF00156	KOG1712	2.4.2.7	0	K00759	GO:0009116	0	AT5G11160	phosphoribosyl transferase, putative, expressed; adenine phosphoribosyltransferase 5	adenine phosphoribosyltransferase 5	Pribosyltran, UPRTase	Pribosyltran, UPRTase
Gohir.A02G147800.1	NEC	EC	2.81967	1.07714e-05	7.61728e-05	PF08263,PF00069,PF13855	KOG1187	2.7.11.1	SignalP-noTM	0	GO:0006468,GO:0004672,GO:0005524,GO:0005515	0	NA	NA	HAESA-like 2	LRR_8, Pkinase, Pkinase_Tyr, LRR_4, LRR_1, LRRNT_2, LRR_6, APH, Pkinase_fungal, DUF5612	LRR_8, Pkinase, Pkinase_Tyr, LRR_4, LRR_1, LRRNT_2, LRR_6, APH, Pkinase_fungal, DUF5612
Gohir.A09G074100.1	NEC	EC	2.81963	2.17043e-05	0.000141553	0	0	0	0	0	0	0	AT4G18570	chloroplast unusual positioning protein, putative, expressed; Tetratricopeptide repeat (TPR)-like superfamily protein	Tetratricopeptide repeat (TPR)-like superfamily protein	HALZ, PikAIV_N, 5_nucleotid, Spc42p, FlaC_arch, PRKG1_interact, pRN1_helical, Spore_III_AB, YscO, Cnn_1N	HALZ, PikAIV_N, 5_nucleotid, Spc42p, FlaC_arch, PRKG1_interact, pRN1_helical, Spore_III_AB
Gohir.D09G223500.1	NEC	EC	2.81956	1.50425e-08	2.07268e-07	PF08392,PF08541	0	2.3.1.199	0	0	GO:0016747,GO:0006633,GO:0016020	K15397	AT5G43760	3-ketoacyl-CoA synthase, putative, expressed; 3-ketoacyl-CoA synthase 20	3-ketoacyl-CoA synthase 2	FAE1_CUT1_RppA, ACP_syn_III_C, Chal_sti_synt_C, ACP_syn_III, Chal_sti_synt_N, DUF423	FAE1_CUT1_RppA, ACP_syn_III_C, Chal_sti_synt_C, ACP_syn_III, Chal_sti_synt_N, DUF423
Gohir.D08G189200.1	NEC	EC	2.81915	0.00371495	0.0128284	PF00011	KOG0710	0	0	K13993	0	0	AT4G25200	heat shock 22 kDa protein, mitochondrial precursor, putative, expressed; mitochondrion-localized small heat shock protein 23.6	mitochondrion-localized small heat shock protein 23.6	HSP20, ArsA_HSP20, NPIP, DUF2807	HSP20, ArsA_HSP20, NPIP, DUF2807
Gohir.A12G175160.1	NEC	EC	2.81841	1.06859e-17	8.27198e-16	PF00854	KOG1237	0	0	K14638	GO:0005215,GO:0006810,GO:0016020	0	AT5G62680	peptide transporter PTR2, putative, expressed; Major facilitator superfamily protein	Major facilitator superfamily protein	PTR2, Peptidase_U4	PTR2, Peptidase_U4
Gohir.D06G197200.1	NEC	EC	2.81304	6.0576e-13	2.04489e-11	0	0	0	0	0	0	0	NA	NA	0	#N/A	#N/A
Gohir.A13G157400.1	NEC	EC	2.81292	3.20127e-06	2.57818e-05	PF08879,PF08880	0	0	0	0	GO:0006355,GO:0006351,GO:0005634,GO:0005524,GO:0032502	0	NA	NA	growth-regulating factor 5	WRC, QLQ, K_channel_TID	WRC, QLQ, K_channel_TID
Gohir.A01G186201.1	NEC	EC	2.81281	7.6742e-05	0.000435481	PF01915,PF14310,PF00933	0	3.2.1.37	SignalP-noTM	0	GO:0004553,GO:0005975	0	AT1G78060	glycosyl hydrolase family 3 protein, putative, expressed; Glycosyl hydrolase family protein	Glycosyl hydrolase family protein	Glyco_hydro_3_C, Glyco_hydro_3, Fn3-like	Glyco_hydro_3_C, Glyco_hydro_3, Fn3-like
Gohir.A13G016300.1	NEC	EC	2.8127	0.00136368	0.00543146	PF00230	KOG0223	0	0	K09872	GO:0016020,GO:0005215,GO:0006810	0	AT4G00430	aquaporin protein, putative, expressed; plasma membrane intrinsic protein 1;4	plasma membrane intrinsic protein 1;4	MIP, DUF3522	MIP, DUF3522
Gohir.A06G100002.1	NEC	EC	2.81018	0.00854372	0.0259132	0	0	0	0	0	0	0	AT1G08220	ATP10 protein, expressed	0	ATP-synt_10	ATP-synt_10
Gohir.D06G170000.2	NEC	EC	2.81002	4.86613e-07	4.76548e-06	PF00153	0	0	0	0	0	0	AT2G39970	mitochondrial carrier protein, putative, expressed; Mitochondrial substrate carrier family protein	Mitochondrial substrate carrier family protein	Mito_carr, MASE4, MAPEG	Mito_carr, MASE4, MAPEG
Gohir.A09G026800.1	NEC	EC	2.8093	0.000751013	0.00322379	PF01073	KOG1502	0	0	0	GO:0016616,GO:0003854,GO:0006694,GO:0055114	0	AT5G14700	cinnamoyl-CoA reductase-related, putative, expressed; NAD(P)-binding Rossmann-fold superfamily protein	NAD(P)-binding Rossmann-fold superfamily protein	3Beta_HSD, Epimerase	3Beta_HSD, Epimerase
Gohir.D13G151700.1	NEC	EC	2.80865	6.21298e-17	4.19163e-15	PF01554	KOG1347	0	0	K03327	GO:0015238,GO:0055085,GO:0006855,GO:0016020,GO:0015297	0	AT3G23560	MATE efflux family protein, putative, expressed; MATE efflux family protein	MATE efflux family protein	MatE	MatE
Gohir.D06G053900.1	NEC	EC	2.8084	2.31321e-10	4.72394e-09	PF02874,PF00306,PF00006	KOG1353	3.6.3.14	0	K02132	GO:0046034,GO:0005524,GO:0015986,GO:0015992	0	ATMG01190	ATP synthase, putative, expressed; ATP synthase subunit 1	ATP synthase subunit 1	ATP-synt_ab, ATP-synt_ab_C, ATP-synt_ab_N, HAS-barrel, TniB	ATP-synt_ab, ATP-synt_ab_C, ATP-synt_ab_N, HAS-barrel, TniB
Gohir.D01G062900.1	NEC	EC	2.80831	0.0414658	0.0957247	PF01253	KOG1770	0	0	K03113	GO:0003743,GO:0006413	0	AT1G54290	translation initiation factor SUI1, putative, expressed; Translation initiation factor SUI1 family protein	Translation initiation factor SUI1 family protein	SUI1	SUI1
Gohir.D10G246200.1	NEC	EC	2.80783	0.0131479	0.0370793	PF01490	KOG1303	0	0	K13946	0	0	AT2G38120	transmembrane amino acid transporter protein, putative, expressed; Transmembrane amino acid transporter family protein	Transmembrane amino acid transporter family protein	Aa_trans, DUF2516	Aa_trans, DUF2516
Gohir.A12G156700.1	NEC	EC	2.80694	6.64182e-09	9.84429e-08	PF00046,PF01852	KOG2251	0	0	K09338	GO:0008289,GO:0003677	0	AT1G05230	homeobox and START domains containing protein, putative, expressed; homeodomain GLABROUS 2	homeodomain GLABROUS 2	START, Homeodomain, Homeobox_KN, YabA, zf_Rg, DivIC, NRBF2, ZapB, PikAIV_N	START, Homeodomain, Homeobox_KN, YabA, zf_Rg, DivIC, NRBF2, ZapB, PikAIV_N
Gohir.D06G141500.1	NEC	EC	2.80662	1.84785e-05	0.000122661	PF00504	0	0	0	K08912	GO:0009765,GO:0016020	0	AT1G29930	chlorophyll A-B binding protein, putative, expressed; chlorophyll A/B binding protein 1	chlorophyll A/B binding protein 1	Chloroa_b-bind	Chloroa_b-bind
Gohir.A05G096000.1	NEC	EC	2.80559	2.36468e-06	1.975e-05	0	0	0	0	0	0	0	NA	NA	0	#N/A	#N/A
Gohir.D13G141300.1	NEC	EC	2.80144	5.38082e-06	4.1082e-05	PF12056	0	0	0	0	0	0	AT3G20300	extracellular ligand-gated ion channel, putative, expressed; Protein of unknown function (DUF3537)	Protein of unknown function (DUF3537)	DUF3537	DUF3537
Gohir.A02G167901.1	NEC	EC	2.80077	8.25932e-06	6.02234e-05	PF00153	KOG0764	0	0	0	0	0	AT5G66380	mitochondrial carrier protein, putative, expressed; folate transporter 1	folate transporter 1	Mito_carr	Mito_carr
Gohir.D05G093301.1	NEC	EC	2.80036	0.000884072	0.00372065	0	0	0	SignalP-noTM	0	0	0	NA	NA	NA	#N/A	#N/A
Gohir.D05G254700.1	NEC	EC	2.79963	3.32521e-06	2.66374e-05	PF00847	0	0	0	0	GO:0006355,GO:0003700	0	AT1G71520	AP2 domain containing protein, expressed; Integrase-type DNA-binding superfamily protein	Integrase-type DNA-binding superfamily protein	AP2	AP2
Gohir.A02G119500.2	NEC	EC	2.79722	1.31631e-05	9.10655e-05	PF02309	0	0	0	0	GO:0005634,GO:0006355	0	AT4G29080	OsIAA21 - Auxin-responsive Aux/IAA gene family member, expressed; phytochrome-associated protein 2	phytochrome-associated protein 2	AUX_IAA	AUX_IAA
Gohir.D12G234501.1	NEC	EC	2.79683	2.38967e-06	1.99272e-05	0	0	0	0	0	0	0	AT1G64080	expressed protein	0	TFIIF_alpha	TFIIF_alpha
Gohir.D13G142800.1	NEC	EC	2.79644	1.22343e-05	8.53297e-05	PF13639	0	0	0	0	0	0	AT3G20395	RING-H2 finger protein ATL2B, putative, expressed; RING/U-box superfamily protein	RING/U-box superfamily protein	zf-RING_2, zf-rbx1, zf-C3HC4_2, zf-RING_11, zf-C3HC4, zf-RING_UBOX, zf-RING_5, zf-C3HC4_3, zf-ANAPC11, Prok-RING_4, Zn_ribbon_17, FANCL_C, Gly-zipper_YMGG, DUF5518, Gly-zipper_Omp, RINGv, Prok-RING_1, zf-RING_4, zf-C3HC4_4, Zn_ribbon_2, Tmpp129, zf-C3H2C3, zf-Di19, zf-HC5HC2H, LrgB, zf-RING-like, PHD, Gly-zipper_OmpA, DUF1269	zf-RING_2, zf-rbx1, zf-C3HC4_2, zf-RING_11, zf-C3HC4, zf-RING_UBOX, zf-RING_5, zf-C3HC4_3,
Gohir.D12G108200.1	NEC	EC	2.79603	2.93111e-29	1.11949e-26	PF01852,PF00046	0	0	0	K09338	GO:0008289,GO:0003677	0	AT4G00730	homeobox and START domains containing protein, putative, expressed; Homeobox-leucine zipper family protein / lipid-binding START domain-containing protein	Homeobox-leucine zipper family protein / lipid-binding START domain-containing protein	START, Homeodomain, Homeobox_KN	START, Homeodomain, Homeobox_KN
Gohir.D04G118000.1	NEC	EC	2.7959	0.001025	0.00423696	PF00403	KOG1603	0	0	0	GO:0030001,GO:0046872	0	AT2G37390	heavy metal-associated domain containing protein, expressed; Chloroplast-targeted copper chaperone protein	Chloroplast-targeted copper chaperone protein	HMA	HMA
Gohir.D10G140200.1	NEC	EC	2.79359	8.47296e-06	6.15772e-05	PF00534,PF00862,PF05116	KOG0853	2.4.1.14	0	K00696	GO:0016157,GO:0005985	0	AT1G04920	sucrose-phosphate synthase, putative, expressed; sucrose phosphate synthase 3F	sucrose phosphate synthase 3F	Glycos_transf_1, Glyco_trans_1_4, S6PP, Sucrose_synth, Glyco_transf_4, Glyco_trans_4_4, DUF1752, Glyco_trans_1_2, SAP	Glycos_transf_1, Glyco_trans_1_4, S6PP, Sucrose_synth, Glyco_transf_4, Glyco_trans_4_4, DU
Gohir.A11G067500.1	NEC	EC	2.79286	2.0725e-10	4.29694e-09	PF07714	KOG0192	2.7.12.1	0	0	GO:0004672,GO:0006468	0	AT3G01490	protein kinase domain containing protein, expressed; Protein kinase superfamily protein	Protein kinase superfamily protein	Pkinase_Tyr, Pkinase, Pkinase_fungal, Kinase-like, Haspin_kinase, ABC1, APH	Pkinase_Tyr, Pkinase, Pkinase_fungal, Kinase-like, Haspin_kinase, ABC1, APH
Gohir.A01G164300.1	NEC	EC	2.79189	9.256e-07	8.49567e-06	PF01190	0	0	0	0	0	0	AT2G16630	POEI25 - Pollen Ole e I allergen and extensin family protein precursor, expressed; Pollen Ole e 1 allergen and extensin family protein	Pollen Ole e 1 allergen and extensin family protein	Pollen_Ole_e_I	Pollen_Ole_e_I
Gohir.D07G064800.1	NEC	EC	2.79091	1.98884e-08	2.66799e-07	PF00005,PF01061	KOG0061	3.6.3.25	0	0	GO:0005524,GO:0016020,GO:0016887	0	AT1G17840	white-brown complex homolog protein 11, putative, expressed; white-brown complex homolog protein 11	white-brown complex homolog protein 11	ABC2_membrane, ABC_tran, AAA_21, AAA_29, SMC_N, RsgA_GTPase, AAA_16, AAA_23, AAA_25, Cytidylate_kin, AAA_22, AAA_5, AAA_18, AAA_33, NACHT, AAA_30	ABC2_membrane, ABC_tran, AAA_21, AAA_29, SMC_N, RsgA_GTPase, AAA_16, AAA_23, AAA_25, Cytid
Gohir.D08G200100.1	NEC	EC	2.79038	4.53878e-06	3.51997e-05	PF08372,PF00168	KOG1028	0	0	0	0	0	AT4G11610	anthranilate phosphoribosyltransferase, putative, expressed; C2 calcium/lipid-binding plant phosphoribosyltransferase family protein	C2 calcium/lipid-binding plant phosphoribosyltransferase family protein	C2, PRT_C, Pex24p, Reticulon, SelP_N	C2, PRT_C, Pex24p, Reticulon, SelP_N
Gohir.D10G200450.1	NEC	EC	2.78924	0.0182958	0.0488543	PF13249	0	5.4.99.8	0	0	0	0	AT2G07050	cycloartenol synthase, putative, expressed; cycloartenol synthase 1	cycloartenol synthase 1	SQHop_cyclase_N, Prenyltrans, SQHop_cyclase_C, US10	SQHop_cyclase_N, Prenyltrans, SQHop_cyclase_C, US10
Gohir.A02G121401.1	NEC	EC	2.78881	0.000131096	0.000696296	PF04844	0	0	0	0	0	0	NA	NA	ovate family protein 14	Ovate, M20_dimer	Ovate, M20_dimer
Gohir.D08G186400.1	NEC	EC	2.78822	3.51276e-11	8.49495e-10	PF02183,PF04618,PF00046	KOG0483	0	0	K09338	GO:0005634,GO:0043565,GO:0003677,GO:0003700,GO:0006355	0	AT4G16780	homeobox associated leucine zipper, putative, expressed; homeobox protein 2	Homeobox-leucine zipper protein 4 (HB-4) / HD-ZIP protein	HD-ZIP_N, Homeodomain, HALZ, Homeobox_KN, NRBF2	HD-ZIP_N, Homeodomain, HALZ, Homeobox_KN, NRBF2
Gohir.A05G097100.1	NEC	EC	2.7882	0.00743678	0.0230488	PF12681	0	0	0	0	0	0	AT1G07645	glyoxalase family protein, putative, expressed; dessication-induced 1VOC superfamily protein	dessication-induced 1VOC superfamily protein	Glyoxalase_2, Glyoxalase_6, Glyoxalase, Glyoxalase_4	Glyoxalase_2, Glyoxalase_6, Glyoxalase, Glyoxalase_4
Gohir.D13G227800.1	NEC	EC	2.78817	4.94821e-14	2.04358e-12	PF00170	0	0	0	0	GO:0006355,GO:0003700	0	AT3G44460	bZIP transcription factor, putative, expressed; Basic-leucine zipper (bZIP) transcription factor family protein	Basic-leucine zipper (bZIP) transcription factor family protein	bZIP_1, bZIP_2, HAUS6_N, TMEM247, bZIP_Maf	bZIP_1, bZIP_2, HAUS6_N, TMEM247, bZIP_Maf
Gohir.A10G176000.1	NEC	EC	2.78638	4.95888e-09	7.57836e-08	PF00578,PF10417	KOG0854	1.11.1.15	0	K11188	GO:0016209,GO:0051920,GO:0055114,GO:0016491	0	AT1G48130	peroxiredoxin, putative, expressed; 1-cysteine peroxiredoxin 1	1-cysteine peroxiredoxin 1	AhpC-TSA, Redoxin, 1-cysPrx_C, AhpC-TSA_2	AhpC-TSA, Redoxin, 1-cysPrx_C, AhpC-TSA_2
Gohir.D01G142066.1	NEC	EC	2.78621	0.00645835	0.0204415	0	0	0	0	0	0	0	NA	NA	NA	#N/A	#N/A
Gohir.A01G126800.2	NEC	EC	2.78536	0.000167376	0.000862803	PF00253	0	0	0	K02954	GO:0005840,GO:0003735,GO:0005622,GO:0006412	0	AT2G34520	succinate dehydrogenase iron-sulfur subunit 2,mitochondrial precursor, putative, expressed; mitochondrial ribosomal protein S14	mitochondrial ribosomal protein S14	Ribosomal_S14	Ribosomal_S14
Gohir.D12G213200.1	NEC	EC	2.78328	5.27027e-12	1.49515e-10	PF00072,PF00249	0	0	0	0	GO:0000160	0	AT4G18020	two-component response regulator, putative, expressed; CheY-like two-component responsive regulator family protein	CheY-like two-component responsive regulator family protein	Response_reg, Myb_DNA-binding	Response_reg, Myb_DNA-binding
Gohir.A08G179001.1	NEC	EC	2.78265	1.35627e-05	9.34105e-05	PF00612	0	0	0	0	GO:0005515	0	AT4G23060	IQ calmodulin-binding motif family protein, putative, expressed; IQ-domain 22	IQ-domain 22	IQ	IQ
Gohir.D01G175600.1	NEC	EC	2.78238	0.085371	0.170934	0	0	0	0	0	0	0	NA	NA	0	#N/A	#N/A
Gohir.D05G207900.1	NEC	EC	2.78182	0.000284534	0.00137535	PF00179	KOG0424	6.3.2.19	0	K10577	GO:0019789	0	AT3G57870	ubiquitin-conjugating enzyme, putative, expressed; sumo conjugation enzyme 1	sumo conjugation enzyme 1	UQ_con, Prok-E2_B	UQ_con, Prok-E2_B
Gohir.D02G206100.1	NEC	EC	2.78107	0.00122366	0.00494235	0	0	0	SignalP-noTM	0	0	0	NA	NA	arabinogalactan protein 18	#N/A	#N/A
Gohir.A13G046650.1	NEC	EC	2.78043	0.108034	0.205969	0	0	0	0	0	0	0	NA	NA	NA	#N/A	#N/A
Gohir.D06G204400.1	NEC	EC	2.78038	3.53211e-13	1.25275e-11	PF14226,PF03171	KOG0143	1.14.11.13	0	0	GO:0055114,GO:0016491	0	AT1G30040	gibberellin 2-beta-dioxygenase, putative, expressed; gibberellin 2-oxidase	gibberellin 2-oxidase	2OG-FeII_Oxy, DIOX_N	2OG-FeII_Oxy, DIOX_N
Gohir.A05G194400.1	NEC	EC	2.77965	8.56697e-17	5.67212e-15	PF08030,PF01794,PF08414,PF08022	KOG0039	1.6.3.1	0	K13447	GO:0016491,GO:0055114,GO:0004601,GO:0050664	0	AT5G47910	respiratory burst oxidase, putative, expressed; respiratory burst oxidase homologue D	respiratory burst oxidase homologue D	NAD_binding_6, NADPH_Ox, FAD_binding_8, Ferric_reduct, EF-hand_7, EF-hand_1, EF-hand_6, EF-hand_5, DUF3037, DUF1430	NAD_binding_6, NADPH_Ox, FAD_binding_8, Ferric_reduct, EF-hand_7, EF-hand_1, EF-hand_6, EF
Gohir.A02G142800.1	NEC	EC	2.77949	0.0442616	0.100963	PF00249	KOG0048	0	0	0	0	0	AT1G34670	MYB family transcription factor, putative, expressed; myb domain protein 93	myb domain protein 93	Myb_DNA-binding, Myb_DNA-bind_6, SLIDE, Myb_DNA-bind_7	Myb_DNA-binding, Myb_DNA-bind_6, SLIDE, Myb_DNA-bind_7
Gohir.A01G053500.1	NEC	EC	2.77945	3.72019e-19	3.59676e-17	0	0	0	0	0	0	0	AT1G78780	pathogen-related protein, putative, expressed; pathogenesis-related family protein	pathogenesis-related family protein	SnoaL, SnoaL_2	SnoaL, SnoaL_2
Gohir.A10G227500.1	NEC	EC	2.7787	1.49209e-07	1.64493e-06	PF00646,PF08268	0	0	0	0	GO:0005515	0	NA	NA	F-box and associated interaction domains-containing protein	FBA_3, F-box-like, F-box, Kelch_6, Kelch_1	FBA_3, F-box-like, F-box, Kelch_6, Kelch_1
Gohir.A05G239150.1	NEC	EC	2.77699	0.0109402	0.0318262	0	0	0	0	0	0	0	NA	NA	NA	#N/A	#N/A
Gohir.D06G035100.1	NEC	EC	2.77687	1.19196e-11	3.15314e-10	PF12937	0	0	0	0	GO:0005515	0	AT4G08980	OsFBX192 - F-box domain containing protein, expressed; F-BOX WITH WD-40 2	F-BOX WITH WD-40 2	F-box-like, F-box, LRR_8, LRR_6	F-box-like, F-box, LRR_8, LRR_6
Gohir.A09G027666.1	NEC	EC	2.77458	0.000248681	0.00122535	PF00067	0	0	0	0	GO:0055114,GO:0005506,GO:0016705,GO:0020037	0	AT4G39490	cytochrome P450 protein, putative, expressed; cytochrome P450, family 96, subfamily A, polypeptide 10	cytochrome P450, family 96, subfamily A, polypeptide 10	p450	p450
Gohir.A04G062200.1	NEC	EC	2.77396	0.000905813	0.00379969	0	0	0	0	0	0	0	NA	NA	F-box family protein	YafQ_toxin, Tmemb_18A, DUF1247, Cyclophil_like2	YafQ_toxin, Tmemb_18A, DUF1247, Cyclophil_like2
Gohir.A03G076000.1	NEC	EC	2.77372	1.38482e-07	1.53916e-06	PF00249	0	0	0	0	0	0	AT1G74840	myb-related transcription activator, putative, expressed; Homeodomain-like superfamily protein	myb-like transcription factor family protein	Myb_DNA-binding, Myb_DNA-bind_6	Myb_DNA-binding, Myb_DNA-bind_6
Gohir.A05G087400.1	NEC	EC	2.77327	0.0036714	0.0127075	PF00504	0	0	0	K08907	GO:0016020,GO:0009765	0	AT3G54890	chlorophyll A-B binding protein, putative, expressed; photosystem I light harvesting complex gene 1	photosystem I light harvesting complex gene 1	Chloroa_b-bind	Chloroa_b-bind
Gohir.A10G100200.2	NEC	EC	2.77287	0.230793	0.367788	0	0	0	SignalP-noTM	0	0	0	NA	NA	0	#N/A	#N/A
Gohir.D05G181000.1	NEC	EC	2.7724	0.000187045	0.0009521	PF02365	0	0	0	0	GO:0003677,GO:0006355	0	AT1G76420	CUP-SHAPED COTYLEDON3, putative, expressed; NAC (No Apical Meristem) domain transcriptional regulator superfamily protein	NAC (No Apical Meristem) domain transcriptional regulator superfamily protein	NAM	NAM
Gohir.D05G072800.1	NEC	EC	2.77179	3.07384e-12	9.08858e-11	PF01061,PF00005	KOG0061	3.6.3.44	0	0	GO:0016887,GO:0016020,GO:0005524	0	AT3G21090	white-brown complex homolog protein 12, putative, expressed; ABC-2 type transporter family protein	ABC-2 type transporter family protein	ABC2_membrane, ABC_tran, AAA_29, SMC_N, AAA_16, AAA_21, AAA_25, RsgA_GTPase, AAA_22, Cytidylate_kin, AAA_33, NACHT, AAA_23, NB-ARC, Rad17, AAA_18, AAA_17, MMR_HSR1, AAA_5, RNA_helicase, ATPase_2, AAA_28, AAA_24, ABC2_membrane_3	ABC2_membrane, ABC_tran, AAA_29, SMC_N, AAA_16, AAA_21, AAA_25, RsgA_GTPase, AAA_22, Cytid
Gohir.A06G128000.1	NEC	EC	2.76996	7.64255e-10	1.40826e-08	PF00230	KOG0223	0	0	K09874	GO:0005215,GO:0006810,GO:0016020	0	AT4G18910	aquaporin protein, putative, expressed; NOD26-like intrinsic protein 1;2	NOD26-like intrinsic protein 1;2	MIP, Phage_holin_3_5	MIP, Phage_holin_3_5
Gohir.A07G003100.1	NEC	EC	2.76963	0.0959993	0.187733	0	0	0	SignalP-noTM	0	0	0	NA	NA	0	Toxin_2, PIF3, EB, Nodulin_late, MLANA	Toxin_2, PIF3, EB, Nodulin_late, MLANA
Gohir.A07G014700.1	NEC	EC	2.76674	0.000533458	0.00239421	PF00249	KOG0048	0	0	K09422	0	0	AT5G35550	myb-like DNA-binding domain containing protein, putative, expressed; Duplicated homeodomain-like superfamily protein	Duplicated homeodomain-like superfamily protein	Myb_DNA-binding, Myb_DNA-bind_6, Rap1_C, EVI2A	Myb_DNA-binding, Myb_DNA-bind_6, Rap1_C, EVI2A
Gohir.D06G130650.1	NEC	EC	2.76623	5.09091e-05	0.000302134	0	0	0	0	0	0	0	NA	NA	NA	#N/A	#N/A
Gohir.D06G041600.1	NEC	EC	2.76454	2.41237e-11	6.0003e-10	0	0	0	0	0	0	0	AT1G36940	expressed protein	0	#N/A	#N/A
Gohir.D11G046700.1	NEC	EC	2.76425	3.01276e-07	3.10855e-06	PF00804	KOG0810	0	0	K08486	GO:0016020	0	AT2G18260	syntaxin-related protein, putative, expressed; syntaxin of plants 112	syntaxin of plants 112	Syntaxin, SNARE, PSCyt2, Enkurin, Syntaxin_2, DUF2207, IL2	Syntaxin, SNARE, PSCyt2, Enkurin, Syntaxin_2, DUF2207, IL2
Gohir.A01G123000.1	NEC	EC	2.76404	0.0037159	0.0128298	PF10237	0	0	0	0	GO:0008168	0	AT3G58470	N2, N2-dimethylguanosine tRNA methyltransferase, putative, expressed; nucleic acid binding;methyltransferases	nucleic acid binding;methyltransferases	N6-adenineMlase, hGDE_N	N6-adenineMlase, hGDE_N
Gohir.D11G259301.1	NEC	EC	2.76404	0.0037159	0.0128298	PF10237	0	0	0	0	GO:0008168	0	AT3G58470	N2, N2-dimethylguanosine tRNA methyltransferase, putative, expressed; nucleic acid binding;methyltransferases	nucleic acid binding;methyltransferases	N6-adenineMlase, hGDE_N	N6-adenineMlase, hGDE_N
Gohir.1Z049542.1	NEC	EC	2.7638	5.50404e-05	0.000323989	PF08392,PF08541	0	2.3.1.199	0	0	GO:0006633,GO:0016747,GO:0016020	K15397	AT5G04530	3-ketoacyl-CoA synthase precursor, putative, expressed; 3-ketoacyl-CoA synthase 19	3-ketoacyl-CoA synthase 19	#N/A	#N/A
Gohir.A05G292950.1	NEC	EC	2.7638	5.50404e-05	0.000323989	PF08541,PF08392	0	2.3.1.199	0	0	GO:0006633,GO:0016747,GO:0016020	K15397	AT5G04530	3-ketoacyl-CoA synthase precursor, putative, expressed; 3-ketoacyl-CoA synthase 19	3-ketoacyl-CoA synthase 19	FAE1_CUT1_RppA, ACP_syn_III_C, Chal_sti_synt_C	FAE1_CUT1_RppA, ACP_syn_III_C, Chal_sti_synt_C
Gohir.D04G179400.2	NEC	EC	2.76246	2.76726e-05	0.000175741	PF04864	0	2.6.1.99	0	0	GO:0016846	0	AT1G70560	alliin lyase precursor, putative, expressed; tryptophan aminotransferase of Arabidopsis 1	tryptophan aminotransferase of Arabidopsis 1	Alliinase_C, Aminotran_1_2	Alliinase_C, Aminotran_1_2
Gohir.D12G122966.1	NEC	EC	2.76014	0.00157715	0.00615594	0	0	0	0	0	0	0	NA	NA	NA	#N/A	#N/A
Gohir.A07G173200.1	NEC	EC	2.76012	8.30381e-07	7.71982e-06	PF00538,PF02178	0	0	0	0	GO:0003677,GO:0000786,GO:0006334,GO:0005634	0	NA	NA	high mobility group A	Linker_histone, AT_hook	Linker_histone, AT_hook
Gohir.A11G267800.2	NEC	EC	2.75801	9.17237e-12	2.4789e-10	PF05498	0	0	0	0	0	0	NA	NA	ralf-like 33	RALF	RALF
Gohir.D11G277700.2	NEC	EC	2.75762	2.11898e-19	2.13347e-17	PF05498	0	0	0	0	0	0	NA	NA	NA	RALF, MMtag	RALF, MMtag
Gohir.D10G105900.1	NEC	EC	2.75395	1.31099e-05	9.07794e-05	PF04564	0	6.3.2.19	0	0	GO:0004842,GO:0016567	0	AT5G64660	U-box domain containing protein, expressed; CYS, MET, PRO, and GLY protein 2	ARM repeat superfamily protein	U-box, DUF3361, zf-Nse, Cnd1, zf-C3HC4_2	U-box, DUF3361, zf-Nse, Cnd1, zf-C3HC4_2
Gohir.D06G092966.1	NEC	EC	2.75361	0.000680633	0.00295683	0	0	0	0	0	0	0	NA	NA	NA	#N/A	#N/A
Gohir.A05G127700.1	NEC	EC	2.75226	5.73303e-37	4.81721e-34	PF02309	0	0	0	K14484	GO:0006355,GO:0005634	0	AT4G29080	OsIAA21 - Auxin-responsive Aux/IAA gene family member, expressed; phytochrome-associated protein 2	phytochrome-associated protein 2	AUX_IAA	AUX_IAA
Gohir.D02G020000.1	NEC	EC	2.75197	6.20567e-06	4.6838e-05	0	0	0	0	0	0	0	NA	NA	0	#N/A	#N/A
Gohir.A01G211000.4	NEC	EC	2.75152	2.40123e-06	2.00091e-05	PF03016	KOG1021	2.4.2.41	0	0	GO:0006486,GO:0016757	0	AT5G03795	exostosin family protein, putative, expressed; Exostosin family protein	Exostosin family protein	Exostosin	Exostosin
Gohir.A07G173280.1	NEC	EC	2.75038	0.0212005	0.0550674	0	0	0	0	0	0	0	NA	NA	0	#N/A	#N/A
Gohir.D06G156300.1	NEC	EC	2.74846	1.83083e-05	0.000121636	PF00544	0	4.2.2.2	SignalP-noTM	K01728	0	0	AT4G22080	pectate lyase precursor, putative, expressed; root hair specific 14	root hair specific 14	Pec_lyase_C, Beta_helix	Pec_lyase_C, Beta_helix
Gohir.A09G157800.1	NEC	EC	2.74643	0.0125918	0.0357861	PF00106	KOG1208	1.1.1.330	0	0	0	0	AT5G02540	oxidoreductase, short chain dehydrogenase/reductase family domain containing family, expressed; NAD(P)-binding Rossmann-fold superfamily protein	NAD(P)-binding Rossmann-fold superfamily protein	adh_short, adh_short_C2, KR, Epimerase	adh_short, adh_short_C2, KR, Epimerase
Gohir.A04G141400.1	NEC	EC	2.74636	6.70704e-09	9.92505e-08	0	0	0	0	0	0	0	AT1G27990	expressed protein	0	#N/A	#N/A
Gohir.D06G074500.1	NEC	EC	2.74616	0.128226	0.235349	0	0	0	0	0	0	0	NA	NA	0	#N/A	#N/A
Gohir.A12G122200.1	NEC	EC	2.74615	0.0023898	0.00881494	PF15699	0	0	0	0	GO:0010112	0	NA	NA	NIM1-interacting 1	NPR1_interact, Sipho_Gp157, Peptidase_C37	NPR1_interact, Sipho_Gp157, Peptidase_C37
Gohir.A07G032400.1	NEC	EC	2.74506	5.18452e-13	1.77665e-11	PF03822,PF00069	KOG0583	2.7.11.1	0	K07198	GO:0005524,GO:0007165,GO:0006468,GO:0004672	0	AT5G25110	CAMK_KIN1/SNF1/Nim1_like.34 - CAMK includes calcium/calmodulin depedent protein kinases, expressed; CBL-interacting protein kinase 25	CBL-interacting protein kinase 5	Pkinase, Pkinase_Tyr, NAF, Kinase-like, Kdo, Choline_kinase, ABC1, APH	Pkinase, Pkinase_Tyr, NAF, Kinase-like, Kdo, Choline_kinase, ABC1, APH
Gohir.D12G178000.1	NEC	EC	2.74497	2.36186e-07	2.49774e-06	PF00854	KOG1237	0	0	K14638	GO:0016020,GO:0006810,GO:0005215	0	AT5G62680	peptide transporter PTR2, putative, expressed; Major facilitator superfamily protein	Major facilitator superfamily protein	PTR2, Peptidase_U4	PTR2, Peptidase_U4
Gohir.D05G171200.1	NEC	EC	2.74414	0.0179345	0.0480563	PF01946	KOG2960	0	0	K03146	0	0	AT5G54770	FAD dependent oxidoreductase domain containing protein, expressed; thiazole biosynthetic enzyme, chloroplast (ARA6) (THI1) (THI4)	thiazole biosynthetic enzyme, chloroplast (ARA6) (THI1) (THI4)	Thi4, FAD_binding_2, DAO, NAD_binding_8, Pyr_redox_2, FAD_oxidored, Lycopene_cycl, HI0933_like, GIDA, GMC_oxred_N, Pyr_redox_3, NAD_binding_9, FAD_binding_3	Thi4, FAD_binding_2, DAO, NAD_binding_8, Pyr_redox_2, FAD_oxidored, Lycopene_cycl, HI0933_
Gohir.A03G209200.1	NEC	EC	2.74396	1.05097e-09	1.85876e-08	PF01553	KOG2898	2.3.1.15	0	K13506	GO:0008152,GO:0016746	0	AT5G60620	acyltransferase, putative, expressed; glycerol-3-phosphate acyltransferase 9	glycerol-3-phosphate acyltransferase 9	Acyltransferase	Acyltransferase
Gohir.A05G048700.1	NEC	EC	2.74291	3.26092e-05	0.000203319	PF03181	0	0	SignalP-noTM	0	0	0	AT5G25610	BURP domain containing protein, expressed; BURP domain-containing protein	BURP domain-containing protein	BURP, ID	BURP, ID
Gohir.A09G088800.1	NEC	EC	2.74291	3.77834e-05	0.00023195	PF00010	0	0	0	0	GO:0046983	0	AT2G28160	helix-loop-helix DNA-binding domain containing protein, expressed; FER-like regulator of iron uptake	FER-like regulator of iron uptake	HLH, ACT_4	HLH, ACT_4
Gohir.A06G176600.1	NEC	EC	2.74166	8.94153e-07	8.23976e-06	PF01627	KOG4747	0	0	0	GO:0004871,GO:0000160	0	AT3G16360	histidine-containing phosphotransfer protein, putative, expressed; HPT phosphotransmitter 4	HPT phosphotransmitter 4	Hpt	Hpt
Gohir.D06G177300.1	NEC	EC	2.74121	1.10508e-05	7.7922e-05	PF04844	0	0	0	0	0	0	AT5G04820	DUF623 domain containing protein, expressed; ovate family protein 13	ovate family protein 13	Ovate	Ovate
Gohir.D13G021200.1	NEC	EC	2.73953	3.14436e-07	3.22203e-06	PF13710,PF10369	KOG2663	2.2.1.6	0	K01653	GO:0009082,GO:0003984	0	AT5G16290	ACT domain containing protein, expressed; VALINE-TOLERANT 1	VALINE-TOLERANT 1	ALS_ss_C, ACT_5, ACT, ACT_4, ACT_6, Acylphosphatase	ALS_ss_C, ACT_5, ACT, ACT_4, ACT_6, Acylphosphatase
Gohir.D11G300503.1	NEC	EC	2.73856	0.0063709	0.0201974	PF04043	0	0	0	0	GO:0004857	0	NA	NA	Plant invertase/pectin methylesterase inhibitor superfamily protein	PMEI, Rad21_Rec8_N, DMAP1	PMEI, Rad21_Rec8_N, DMAP1
Gohir.D05G050600.1	NEC	EC	2.73768	8.67654e-07	8.02276e-06	PF03181	0	0	SignalP-noTM	0	0	0	AT5G25610	BURP domain containing protein, expressed; BURP domain-containing protein	BURP domain-containing protein	BURP, DUF4236	BURP, DUF4236
Gohir.D07G003400.1	NEC	EC	2.73766	0.0206066	0.0538365	0	0	0	SignalP-noTM	0	0	0	NA	NA	0	Toxin_2, PIF3, EB, Nodulin_late, HRXXH	Toxin_2, PIF3, EB, Nodulin_late, HRXXH
Gohir.1Z049729.1	NEC	EC	2.7369	0.072851	0.150759	0	0	0	0	0	0	0	AT5G06240	expressed protein; embryo defective 2735	embryo defective 2735	#N/A	#N/A
Gohir.A12G207400.1	NEC	EC	2.73662	1.32035e-09	2.28107e-08	PF00005,PF00664	KOG0055	3.6.3.44	0	K05658	GO:0016021,GO:0016887,GO:0042626,GO:0055085,GO:0006810,GO:0005524	0	AT4G25960	multidrug resistance protein, putative, expressed; P-glycoprotein 2	P-glycoprotein 2	ABC_membrane, ABC_tran, SMC_N, ABC_ATPase, AAA_29, AAA_16, Zeta_toxin, AAA_22, AAA_15, RsgA_GTPase, AAA_30, APS_kinase, SbcCD_C, DUF87, AAA_21, AAA, G-alpha, AAA_7, AAA_5, AAA_19, AAA_23, Pox_A32, AAA_24, PRK, DUF815, MMR_HSR1, AAA_25, AAA_33, PspC	ABC_membrane, ABC_tran, SMC_N, ABC_ATPase, AAA_29, AAA_16, Zeta_toxin, AAA_22, AAA_15, Rsg
Gohir.D01G099000.1	NEC	EC	2.73652	0.00303293	0.0108226	PF02519	0	0	0	K14488	GO:0009733	0	AT1G75590	OsSAUR22 - Auxin-responsive SAUR gene family member, expressed; SAUR-like auxin-responsive protein family	SAUR-like auxin-responsive protein family	Auxin_inducible	Auxin_inducible
Gohir.A09G143600.1	NEC	EC	2.73618	5.63323e-09	8.48547e-08	PF03171,PF14226	KOG0143	1.14.11.9	0	0	GO:0055114,GO:0016491	0	AT2G36690	gibberellin 20 oxidase 2, putative, expressed; 2-oxoglutarate (2OG) and Fe(II)-dependent oxygenase superfamily protein	2-oxoglutarate (2OG) and Fe(II)-dependent oxygenase superfamily protein	2OG-FeII_Oxy, DIOX_N	2OG-FeII_Oxy, DIOX_N
Gohir.D06G078350.1	NEC	EC	2.73477	0.053829	0.118386	PF02801	0	2.3.1.179	0	0	0	0	AT1G74960	3-oxoacyl-synthase, putative, expressed; fatty acid biosynthesis 1	fatty acid biosynthesis 1	Ketoacyl-synt_C, KAsynt_C_assoc	Ketoacyl-synt_C, KAsynt_C_assoc
Gohir.A07G004600.1	NEC	EC	2.7332	0.000167897	0.000864919	0	0	0	0	0	0	0	AT4G28840	expressed protein	0	#N/A	#N/A
Gohir.A06G084600.1	NEC	EC	2.73301	7.71007e-10	1.41788e-08	PF01095,PF04043	0	3.1.1.11	SignalP-noTM	K01051	GO:0042545,GO:0030599,GO:0005618,GO:0004857	0	AT4G33220	pectinesterase, putative, expressed; pectin methylesterase 44	pectin methylesterase 44	Pectinesterase, PMEI	Pectinesterase, PMEI
Gohir.A10G220850.1	NEC	EC	2.73238	1.46179e-09	2.49742e-08	0	0	0	0	0	0	0	NA	NA	NA	#N/A	#N/A
Gohir.D05G277900.1	NEC	EC	2.73181	1.09917e-32	5.46204e-30	PF01370	KOG1502	0	0	0	GO:0050662,GO:0003824	0	AT2G33590	reductase, putative, expressed; NAD(P)-binding Rossmann-fold superfamily protein	NAD(P)-binding Rossmann-fold superfamily protein	Epimerase, 3Beta_HSD, NAD_binding_10, GDP_Man_Dehyd, Polysacc_synt_2, NAD_binding_4, KR, NmrA, adh_short	Epimerase, 3Beta_HSD, NAD_binding_10, GDP_Man_Dehyd, Polysacc_synt_2, NAD_binding_4, KR, N
Gohir.A04G088075.1	NEC	EC	2.73136	0.0537848	0.118306	0	0	2.8.1.9	0	0	0	0	AT4G22980	expressed protein	Pyridoxal phosphate (PLP)-dependent transferases superfamily protein	RPAP1_N	RPAP1_N
Gohir.A02G046200.2	NEC	EC	2.7303	1.18255e-09	2.06306e-08	PF00646,PF01167	KOG2502	0	0	0	GO:0005515	0	AT2G47900	OsFBT5 - F-box and tubby domain containing protein, expressed; tubby like protein 3	tubby like protein 3	Tub, F-box, F-box-like, DUF3527	Tub, F-box, F-box-like, DUF3527
Gohir.A04G129742.1	NEC	EC	2.72996	0.191197	0.318976	0	0	0	0	0	0	0	NA	NA	NA	B3	B3
Gohir.D13G027100.1	NEC	EC	2.7297	0.00290143	0.0104113	0	0	0	SignalP-noTM	0	0	0	NA	NA	0	ESF1, FAM35_C	ESF1, FAM35_C
Gohir.A08G210200.1	NEC	EC	2.72904	3.70226e-08	4.64809e-07	PF01477,PF00305	0	1.13.11.58	0	0	GO:0016702,GO:0005515,GO:0055114,GO:0046872	K15718	AT1G55020	lipoxygenase, putative, expressed; lipoxygenase 1	lipoxygenase 1	Lipoxygenase, PLAT, rhaM, PDGF_N	Lipoxygenase, PLAT, rhaM, PDGF_N
Gohir.D01G194900.1	NEC	EC	2.72864	2.02093e-05	0.000132701	PF00786,PF00620	KOG4270	0	0	0	GO:0007165	0	AT5G22400	rhoGAP domain containing protein, expressed; Rho GTPase activating protein with PAK-box/P21-Rho-binding domain	Rho GTPase activating protein with PAK-box/P21-Rho-binding domain	RhoGAP, PBD, Myosin_head	RhoGAP, PBD, Myosin_head
Gohir.D08G035600.1	NEC	EC	2.72752	9.56578e-11	2.11619e-09	PF00808	KOG0869	0	0	0	0	0	AT1G21970	histone-like transcription factor and archaeal histone, putative, expressed; Histone superfamily protein	Histone superfamily protein	CBFD_NFYB_HMF, Histone, Bromo_TP, TFIID-18kDa, CENP-T_C, ChaC	CBFD_NFYB_HMF, Histone, Bromo_TP, TFIID-18kDa, CENP-T_C, ChaC
Gohir.A09G129900.1	NEC	EC	2.72609	3.11485e-07	3.19888e-06	PF04788	0	0	0	0	0	0	AT5G06610	expressed protein; Protein of unknown function (DUF620)	Protein of unknown function (DUF620)	DUF620	DUF620
Gohir.A05G079700.3	NEC	EC	2.72494	1.93911e-16	1.2209e-14	PF01190	0	0	0	0	0	0	AT2G27385	POEI29 - Pollen Ole e I allergen and extensin family protein precursor, putative, expressed; Pollen Ole e 1 allergen and extensin family protein	Pollen Ole e 1 allergen and extensin family protein	Pollen_Ole_e_I, Big_6	Pollen_Ole_e_I, Big_6
Gohir.D02G099000.2	NEC	EC	2.72174	4.11087e-17	2.85255e-15	0	0	0	0	0	0	0	NA	NA	0	RTA1	RTA1
Gohir.A12G213300.3	NEC	EC	2.7216	7.16521e-07	6.7468e-06	PF05033,PF00856,PF02182	KOG1082	2.1.1.43	0	K11420	GO:0005515,GO:0018024,GO:0005634,GO:0008270,GO:0034968	0	AT2G22740	histone-lysine N-methyltransferase, putative, expressed; SU(VAR)3-9 homolog 6	SU(VAR)3-9 homolog 6	SAD_SRA, SET, Pre-SET, CSN8_PSD8_EIF3K	SAD_SRA, SET, Pre-SET, CSN8_PSD8_EIF3K
Gohir.D11G200500.1	NEC	EC	2.72033	1.289e-09	2.23108e-08	PF00010	0	0	0	0	GO:0046983	0	AT4G36930	helix-loop-helix DNA-binding domain containing protein, expressed; basic helix-loop-helix (bHLH) DNA-binding superfamily protein	basic helix-loop-helix (bHLH) DNA-binding superfamily protein	HLH, Ribosomal_S20p	HLH, Ribosomal_S20p
Gohir.D08G160900.1	NEC	EC	2.7203	1.68813e-10	3.57213e-09	PF00071	KOG0393	0	0	K04392	GO:0005525,GO:0003924	0	AT2G44690	ras-related protein, putative, expressed; Arabidopsis RAC-like 9	Arabidopsis RAC-like 9	Ras, Roc, Arf, SUA5, AAA_7	Ras, Roc, Arf, SUA5, AAA_7
Gohir.D01G205200.1	NEC	EC	2.72021	0.118264	0.221104	0	0	0	SignalP-noTM	0	0	0	NA	NA	0	SecIII_SopE_N	SecIII_SopE_N
Gohir.A06G006000.2	NEC	EC	2.71727	7.34638e-10	1.35911e-08	PF13855,PF00069	KOG1187	2.7.11.1	0	0	GO:0005524,GO:0005515,GO:0004672,GO:0006468	0	AT1G75640	leucine-rich repeat family protein, putative, expressed; Leucine-rich receptor-like protein kinase family protein	Leucine-rich receptor-like protein kinase family protein	Pkinase, Pkinase_Tyr, LRR_8, LRR_4, LRR_1, LRR_6, Kinase-like, APH, Kdo	Pkinase, Pkinase_Tyr, LRR_8, LRR_4, LRR_1, LRR_6, Kinase-like, APH, Kdo
Gohir.A13G194900.1	NEC	EC	2.71719	0.000932064	0.00389532	PF13855,PF08263	0	0	SignalP-noTM	0	GO:0005515	0	AT4G29240	uncharacterized protein At4g06744 precursor, putative, expressed; Leucine-rich repeat (LRR) family protein	Leucine-rich repeat (LRR) family protein	LRR_8, LRRNT_2, LRR_4, LRR_6, LRR_1	LRR_8, LRRNT_2, LRR_4, LRR_6, LRR_1
Gohir.A10G227401.1	NEC	EC	2.71592	6.62629e-18	5.30723e-16	PF08268	0	0	0	0	0	0	NA	NA	F-box and associated interaction domains-containing protein	FBA_3, FBA_1, Kelch_6, Kelch_1	FBA_3, FBA_1, Kelch_6, Kelch_1
Gohir.D02G210000.1	NEC	EC	2.71542	0.0111369	0.0323029	PF00847	0	0	0	0	GO:0006355,GO:0003700	0	AT4G34410	AP2 domain containing protein, expressed; redox responsive transcription factor 1	redox responsive transcription factor 1	AP2	AP2
Gohir.A10G107000.2	NEC	EC	2.71437	1.70539e-05	0.000114221	PF11443	0	0	0	0	0	0	AT5G43400	gp176, putative, expressed; Uncharacterised conserved protein UCP015417, vWA	Uncharacterised conserved protein UCP015417, vWA	DUF2828, LUC7, RIFIN, VWA_3	DUF2828, LUC7, RIFIN, VWA_3
Gohir.D07G228600.1	NEC	EC	2.71345	3.13741e-11	7.6513e-10	PF13921	KOG0048	0	0	K09422	0	0	NA	NA	myb domain protein 118	Myb_DNA-binding, Myb_DNA-bind_6, SLIDE, Myb_DNA-bind_7, Rap1_C, SANT_DAMP1_like, PRIMA1	Myb_DNA-binding, Myb_DNA-bind_6, SLIDE, Myb_DNA-bind_7, Rap1_C, SANT_DAMP1_like, PRIMA1
Gohir.A06G068800.1	NEC	EC	2.71164	2.87541e-14	1.24891e-12	PF02365	0	0	0	0	GO:0003677,GO:0006355	0	AT4G29230	no apical meristem protein, putative, expressed; NAC domain containing protein 75	NAC domain containing protein 75	NAM, Med3, PAT1, ANAPC_CDC26, Spt20, DUF4175, DUF2722, Suf, Presenilin	NAM, Med3, PAT1, ANAPC_CDC26, Spt20, DUF4175, DUF2722, Suf, Presenilin
Gohir.A12G056600.1	NEC	EC	2.71026	0.000281186	0.00136142	PF00067	KOG0156	0	0	K00517	GO:0055114,GO:0005506,GO:0016705,GO:0020037	0	AT4G37370	cytochrome P450, putative, expressed; cytochrome P450, family 81, subfamily D, polypeptide 8	cytochrome P450, family 81, subfamily D, polypeptide 8	p450	p450
Gohir.A05G109400.1	NEC	EC	2.70996	0.00625283	0.0198772	PF00067	KOG0156	1.14.13.117	0	K12153	GO:0055114,GO:0005506,GO:0020037,GO:0016705	0	AT5G05260	cytochrome P450, putative, expressed; cytochrome p450 79a2	cytochrome P450, family 79, subfamily B, polypeptide 2	p450, Thrombin_light, FEZ	p450, Thrombin_light, FEZ
Gohir.D05G323200.2	NEC	EC	2.70828	4.56915e-05	0.000274517	PF00854	KOG1237	0	0	0	GO:0016020,GO:0005215,GO:0006810	0	AT1G69860	ligA, putative, expressed; Major facilitator superfamily protein	Major facilitator superfamily protein	PTR2	PTR2
Gohir.A12G150800.1	NEC	EC	2.70791	0.0112854	0.0326535	0	0	0	0	0	GO:0048731	0	NA	NA	CLAVATA3/ESR-RELATED 17	#N/A	#N/A
Gohir.D08G143900.2	NEC	EC	2.70746	6.46835e-05	0.000373473	PF00149	KOG1432	0	0	0	GO:0016787	0	AT5G63140	Ser/Thr protein phosphatase family protein, putative, expressed; purple acid phosphatase 29	purple acid phosphatase 29	Metallophos, Metallophos_2, HGTP_anticodon	Metallophos, Metallophos_2, HGTP_anticodon
Gohir.D12G153200.1	NEC	EC	2.70598	1.02774e-09	1.82397e-08	PF11820	0	0	SignalP-TM	0	0	0	AT5G08391	expressed protein; Protein of unknown function (DUF 3339)	Protein of unknown function (DUF 3339)	DUF3339	DUF3339
Gohir.D09G222800.1	NEC	EC	2.70381	6.95758e-08	8.23189e-07	0	0	0	0	0	0	0	NA	NA	0	#N/A	#N/A
Gohir.A05G416701.1	NEC	EC	2.70374	5.00767e-07	4.8896e-06	0	0	6.2.1.20	0	0	0	0	AT3G23790	AMP-binding enzyme, putative, expressed; AMP-dependent synthetase and ligase family protein	AMP-dependent synthetase and ligase family protein	AMP-binding	AMP-binding
Gohir.A10G220300.1	NEC	EC	2.70357	0.00610845	0.019505	PF01357,PF03330	0	0	SignalP-noTM	0	0	0	AT2G39700	expansin precursor, putative, expressed; expansin A4	expansin A4	Pollen_allerg_1, DPBB_1, DUF5417	Pollen_allerg_1, DPBB_1, DUF5417
Gohir.D12G190700.1	NEC	EC	2.70017	1.58057e-12	4.92212e-11	PF00657	0	3.1.1.1	SignalP-noTM	0	GO:0016788	0	AT3G48460	GDSL-like lipase/acylhydrolase, putative, expressed; GDSL-like Lipase/Acylhydrolase superfamily protein	GDSL-like Lipase/Acylhydrolase superfamily protein	Lipase_GDSL	Lipase_GDSL
Gohir.A11G097700.6	NEC	EC	2.70015	6.04149e-14	2.45776e-12	PF06507,PF02309,PF02362	0	0	0	0	GO:0003677,GO:0006355,GO:0009725,GO:0005634	0	AT4G23980	auxin response factor 7, putative, expressed; auxin response factor 9	auxin response factor 11	Auxin_resp, B3, AUX_IAA	Auxin_resp, B3, AUX_IAA
Gohir.D13G106700.1	NEC	EC	2.6992	3.7931e-06	2.99648e-05	PF14226,PF03171	KOG0143	0	0	0	GO:0016491,GO:0055114	0	AT1G06620	1-aminocyclopropane-1-carboxylate oxidase homolog 2, putative, expressed; 2-oxoglutarate (2OG) and Fe(II)-dependent oxygenase superfamily protein	2-oxoglutarate (2OG) and Fe(II)-dependent oxygenase superfamily protein	2OG-FeII_Oxy, DIOX_N	2OG-FeII_Oxy, DIOX_N
Gohir.D12G125800.1	NEC	EC	2.69784	9.0902e-14	3.60906e-12	PF15699	0	0	0	0	GO:0010112	0	NA	NA	NIM1-interacting 1	NPR1_interact, Sipho_Gp157, Peptidase_C37	NPR1_interact, Sipho_Gp157, Peptidase_C37
Gohir.A11G038400.1	NEC	EC	2.69765	9.94434e-10	1.77334e-08	PF00010	0	0	0	0	GO:0046983	0	AT3G26744	inducer of CBF expression 1, putative, expressed; basic helix-loop-helix (bHLH) DNA-binding superfamily protein	basic helix-loop-helix (bHLH) DNA-binding superfamily protein	HLH	HLH
Gohir.A08G178100.1	NEC	EC	2.6949	1.87504e-06	1.60469e-05	PF00732,PF05199	KOG1238	0	SignalP-TM	0	GO:0055114,GO:0050660,GO:0016614	0	AT1G12570	HOTHEAD precursor, putative, expressed; Glucose-methanol-choline (GMC) oxidoreductase family protein	Glucose-methanol-choline (GMC) oxidoreductase family protein	GMC_oxred_N, GMC_oxred_C, DAO, Pyr_redox_2, NAD_binding_8, FAD_binding_2, Lycopene_cycl	GMC_oxred_N, GMC_oxred_C, DAO, Pyr_redox_2, NAD_binding_8, FAD_binding_2, Lycopene_cycl
Gohir.D05G167700.3	NEC	EC	2.69408	5.33843e-05	0.000315244	PF14364	0	0	0	0	0	0	AT1G11220	fiber expressed protein, putative, expressed; Protein of unknown function (DUF761)	Protein of unknown function (DUF761)	DUF4408	DUF4408
Gohir.D04G089800.1	NEC	EC	2.69405	0.00134184	0.00535599	PF04618,PF02183,PF00046	KOG0483	0	0	K09338	GO:0005634,GO:0043565,GO:0003700,GO:0003677,GO:0006355	0	AT5G06710	homeobox associated leucine zipper, putative, expressed; homeobox from Arabidopsis thaliana	homeobox from Arabidopsis thaliana	Homeodomain, HALZ, HD-ZIP_N, Homeobox_KN, YabA, NRBF2, bZIP_1	Homeodomain, HALZ, HD-ZIP_N, Homeobox_KN, YabA, NRBF2, bZIP_1
Gohir.D07G224000.1	NEC	EC	2.69266	1.53853e-21	2.1036e-19	PF00664,PF00005	KOG0055	3.6.3.44	0	K05658	GO:0055085,GO:0005524,GO:0006810,GO:0016887,GO:0016021,GO:0042626	0	AT3G28345	multidrug resistance protein, putative, expressed; ABC transporter family protein	ABC transporter family protein	ABC_membrane, ABC_tran, SMC_N, AAA_29, AAA_15, AAA_16, Zeta_toxin, AAA_30, RsgA_GTPase, AAA_22, AAA_21, SbcCD_C, G-alpha, AAA_25, ABC_ATPase, AAA_7, DLIC, AAA_23, AAA_24, AAA_18, AAA_5, Ploopntkinase3, APS_kinase, MMR_HSR1, AAA_33, DUF815, AAA_17, AAA_19, AAA_28, DUF87	ABC_membrane, ABC_tran, SMC_N, AAA_29, AAA_15, AAA_16, Zeta_toxin, AAA_30, RsgA_GTPase, AA
Gohir.D04G067600.1	NEC	EC	2.69197	4.45395e-05	0.000268364	PF10457	0	0	0	0	0	0	AT2G40095	hydrolase, alpha/beta fold family protein, putative, expressed; Alpha/beta hydrolase related protein	Alpha/beta hydrolase related protein	MENTAL, 7TMR-DISM_7TM	MENTAL, 7TMR-DISM_7TM
Gohir.A10G202300.1	NEC	EC	2.6904	1.20127e-05	8.3987e-05	PF00847	0	0	0	0	GO:0006355,GO:0003700	0	AT5G05410	AP2 domain containing protein, expressed; DRE-binding protein 2A	Integrase-type DNA-binding superfamily protein	AP2, DUF4136	AP2, DUF4136
Gohir.A09G007900.2	NEC	EC	2.69039	0.000294096	0.00141474	PF00010	0	0	0	0	GO:0046983	K16189	NA	NA	phytochrome interacting factor 4	HLH, NAP	HLH, NAP
Gohir.A05G351800.1	NEC	EC	2.6895	8.31423e-10	1.51751e-08	PF08541,PF08392	0	2.3.1.199	0	0	GO:0016020,GO:0006633,GO:0016747	K15397	AT5G04530	3-ketoacyl-CoA synthase precursor, putative, expressed; 3-ketoacyl-CoA synthase 19	3-ketoacyl-CoA synthase 19	FAE1_CUT1_RppA, ACP_syn_III_C, Chal_sti_synt_C, ABC_trans_aux	FAE1_CUT1_RppA, ACP_syn_III_C, Chal_sti_synt_C, ABC_trans_aux
Gohir.D02G132800.1	NEC	EC	2.68835	0.0210422	0.054761	PF06404	0	0	SignalP-noTM	0	GO:0008083,GO:0008283,GO:0005576	0	NA	NA	phytosulfokine 2 precursor	PSK	PSK
Gohir.D11G212100.1	NEC	EC	2.68829	4.06291e-07	4.0659e-06	PF02183,PF00046	KOG0483	0	0	K09338	GO:0043565,GO:0006355,GO:0003700,GO:0003677	0	AT4G37790	homeobox associated leucine zipper, putative, expressed; Homeobox-leucine zipper protein family	Homeobox-leucine zipper protein family	Homeodomain, HALZ, Homeobox_KN, HD-ZIP_N, Homez, Cluap1, MHC2-interact, PIP5K, NRBF2, Exonuc_VII_L	Homeodomain, HALZ, Homeobox_KN, HD-ZIP_N, Homez, Cluap1, MHC2-interact, PIP5K, NRBF2, Exon
Gohir.D05G052900.1	NEC	EC	2.68775	2.25702e-09	3.70668e-08	PF03009	KOG2258	3.1.4.46	SignalP-noTM	0	GO:0008081,GO:0006629	0	AT5G58170	glycerophosphoryl diester phosphodiesterase family protein, putative, expressed; SHV3-like 5	SHV3-like 5	GDPD	GDPD
Gohir.A06G060800.1	NEC	EC	2.68759	2.10228e-10	4.35086e-09	PF12697	KOG4178	0	0	0	0	0	AT3G24420	hydrolase, alpha/beta fold family domain containing protein, expressed; alpha/beta-Hydrolases superfamily protein	alpha/beta-Hydrolases superfamily protein	Abhydrolase_1, Abhydrolase_6, Hydrolase_4, Esterase, Abhydrolase_4, Ndr	Abhydrolase_1, Abhydrolase_6, Hydrolase_4, Esterase, Abhydrolase_4, Ndr
Gohir.A13G032300.1	NEC	EC	2.68736	0.00164885	0.00639746	0	0	0	0	0	0	0	NA	NA	0	#N/A	#N/A
Gohir.A09G066700.1	NEC	EC	2.68691	0.00516634	0.0169463	0	0	0	0	0	0	0	NA	NA	0	#N/A	#N/A
Gohir.A05G359700.1	NEC	EC	2.68333	3.13318e-05	0.000196282	PF03083	KOG1623	0	0	K15382	GO:0016021	0	AT4G10850	nodulin MtN3 family protein, putative, expressed; Nodulin MtN3 family protein	Nodulin MtN3 family protein	MtN3_slv, PQ-loop, ABC_export, CBAH	MtN3_slv, PQ-loop, ABC_export, CBAH
Gohir.A10G095101.1	NEC	EC	2.68279	9.85389e-06	7.0548e-05	PF04367	0	0	0	0	0	0	AT2G18460	protein of unknown function DUF502 domain containing protein, expressed; like COV 3	like COV 3	DUF502	DUF502
[truncated: 44,606 more rows]
