# Supplementary material for: Transcriptomic profiles of non-embryogenic and embryogenic callus cells in a highly regenerative upland cotton line (Gossypium hirsutum L.)
Source: BMC Dev Biol. 2020 Dec 2;20:25. doi: 10.1186/s12861-020-00230-4 (PMC7713314; doi:10.1186/s12861-020-00230-4)
Supplement: Supplementary file 2 — Additional file 2. Genes uniquely expressed in either NEC or EC cells. Genes with unique expression profiles in embryogenic or nonembryogenic callus with functional annotation from the definition line of Gossypium hirsutum v2.0 and Arabidopsis thaliana. [file 12861_2020_230_MOESM2_ESM.xlsx]

## Sheet: Sheet1
Table S2. Genes uniquely expressed in either NEC or EC cells
Gene	Gene	NEC (exp)	EC (exp)	Callus Type	Ghirsutum_Defline	A. thaliana defline
Gohir.D11G247300.1	Gohir.D11G247300	0	38.053	EC	0	NA
Gohir.A03G181200.1	Gohir.A03G181200	0	15.072	EC	0	0
Gohir.A09G068700.1	Gohir.A09G068700	0	13.897	EC	NA	NA
Gohir.A05G291150.1	Gohir.A05G291150	0	13.185	EC	NA	NA
Gohir.A08G165050.1	Gohir.A08G165050	0	12.04	EC	NA	NA
Gohir.A09G187300.1	Gohir.A09G187300	0	11.549	EC	0	NA
Gohir.A07G162000.3	Gohir.A07G162000	0	10.973	EC	0	NA
Gohir.D03G098901.1	Gohir.D03G098901	0	7.941	EC	0	NA
Gohir.A05G370200.2	Gohir.A05G370200	0	7.82	EC	0	NA
Gohir.A06G023466.1	Gohir.A06G023466	0	7.73	EC	NA	NA
Gohir.A06G051201.1	Gohir.A06G051201	0	7.572	EC	NA	NA
Gohir.D12G136400.1	Gohir.D12G136400	0	6.389	EC	0	NA
Gohir.A11G045350.1	Gohir.A11G045350	0	5.866	EC	NA	NA
Gohir.D11G067750.1	Gohir.D11G067750	0	5.57	EC	NA	NA
Gohir.D09G250166.1	Gohir.D09G250166	0	5.303	EC	0	NA
Gohir.A02G066401.1	Gohir.A02G066401	0	4.992	EC	0	NA
Gohir.D04G167100.1	Gohir.D04G167100	0	4.724	EC	RAD-like 6	MYB family transcription factor, putative, expressed; RAD-like 1
Gohir.D01G117000.1	Gohir.D01G117000	0	4.603	EC	cytochrome C biogenesis 452	cytochrome C biogenesis 452
Gohir.D10G050300.1	Gohir.D10G050300	0	4.369	EC	ROTUNDIFOLIA like 9	expressed protein; ROTUNDIFOLIA like 10
Gohir.D11G074000.1	Gohir.D11G074000	0	4.201	EC	0	NA
Gohir.A07G119800.1	Gohir.A07G119800	0	3.89	EC	0	NA
Gohir.A11G009050.1	Gohir.A11G009050	0	3.85	EC	NA	NA
Gohir.A10G043150.1	Gohir.A10G043150	0	3.849	EC	NA	NA
Gohir.D04G112833.1	Gohir.D04G112833	0	3.755	EC	Ypt/Rab-GAP domain of gyp1p superfamily protein	NA
Gohir.A04G010100.1	Gohir.A04G010100	0	3.615	EC	0	expressed protein
Gohir.D13G154766.1	Gohir.D13G154766	0	3.528	EC	binding	expressed protein; binding
Gohir.D10G142900.1	Gohir.D10G142900	0	3.375	EC	0	NA
Gohir.D04G162700.1	Gohir.D04G162700	0	3.359	EC	0	NA
Gohir.D08G250250.1	Gohir.D08G250250	0	3.325	EC	carbon-sulfur lyases	proline-rich protein 6, putative, expressed; carbon-sulfur lyases
Gohir.D10G199350.1	Gohir.D10G199350	0	3.304	EC	NA	NA
Gohir.D06G153925.1	Gohir.D06G153925	0	3.299	EC	NA	NA
Gohir.D11G223400.1	Gohir.D11G223400	0	3.289	EC	heat shock factor binding protein	heat shock factor-binding protein 1, putative, expressed; heat shock factor binding protein
Gohir.D03G023232.1	Gohir.D03G023232	0	3.284	EC	nucleic acid binding;methyltransferases	N2, N2-dimethylguanosine tRNA methyltransferase, putative, expressed; nucleic acid binding;methyltransferases
Gohir.D05G078500.1	Gohir.D05G078500	0	3.276	EC	0	NA
Gohir.D06G068500.1	Gohir.D06G068500	0	3.276	EC	arabinogalactan protein 20	expressed protein; arabinogalactan protein 41
Gohir.D05G183866.1	Gohir.D05G183866	0	3.249	EC	NA	NA
Gohir.D06G144201.1	Gohir.D06G144201	0	3.154	EC	NA	NA
Gohir.A05G100200.1	Gohir.A05G100200	0	3.063	EC	0	NA
Gohir.A09G059050.1	Gohir.A09G059050	0	3.06	EC	Nucleotide-sugar transporter family protein	UAA transporter family domain containing protein, expressed; Nucleotide-sugar transporter family protein
Gohir.A04G129200.1	Gohir.A04G129200	0	3.009	EC	translocase of the outer mitochondrial membrane 6	expressed protein; translocase of the outer mitochondrial membrane 6
Gohir.D02G124850.1	Gohir.D02G124850	0	2.99	EC	dehydratase family	NA
Gohir.A10G117532.1	Gohir.A10G117532	0	2.909	EC	Small nuclear ribonucleoprotein family protein	NA
Gohir.A07G187732.1	Gohir.A07G187732	0	2.804	EC	0	NA
Gohir.D13G064100.1	Gohir.D13G064100	0	2.773	EC	Adenine nucleotide alpha hydrolases-like superfamily protein	universal stress protein domain containing protein, putative, expressed; Adenine nucleotide alpha hydrolases-like superfamily protein
Gohir.A03G146800.1	Gohir.A03G146800	0	2.745	EC	CLAVATA3/ESR-RELATED 27	NA
Gohir.D06G134101.1	Gohir.D06G134101	0	2.683	EC	NA	NA
Gohir.D05G210050.1	Gohir.D05G210050	0	2.657	EC	NA	NA
Gohir.D05G177000.1	Gohir.D05G177000	0	2.581	EC	RING/U-box superfamily protein	zinc finger, C3HC4 type family protein, expressed; RING/U-box superfamily protein
Gohir.A05G297050.1	Gohir.A05G297050	0	2.579	EC	NA	NA
Gohir.A10G156200.1	Gohir.A10G156200	0	2.524	EC	Signal recognition particle, SRP9/SRP14 subunit	signal recognition particle 9 kDa protein, putative, expressed; Signal recognition particle, SRP9/SRP14 subunit
Gohir.A10G232150.1	Gohir.A10G232150	0	2.508	EC	NA	NA
Gohir.A12G052750.1	Gohir.A12G052750	0	2.477	EC	NA	NA
Gohir.A03G175650.1	Gohir.A03G175650	0	2.404	EC	NA	NA
Gohir.D13G021800.1	Gohir.D13G021800	0	2.379	EC	Ypt/Rab-GAP domain of gyp1p superfamily protein	TBC domain containing protein, expressed; Ypt/Rab-GAP domain of gyp1p superfamily protein
Gohir.D02G236100.1	Gohir.D02G236100	0	2.343	EC	0	NA
Gohir.D07G000522.1	Gohir.D07G000522	0	2.306	EC	AMP-dependent synthetase and ligase family protein	NA
Gohir.D12G071001.1	Gohir.D12G071001	0	2.306	EC	NA	NA
Gohir.D03G022151.1	Gohir.D03G022151	0	2.251	EC	Alba DNA/RNA-binding protein	protein of unknown function domain containing protein, expressed; Alba DNA/RNA-binding protein
Gohir.D04G039800.2	Gohir.D04G039800	0	2.199	EC	DEA(D/H)-box RNA helicase family protein	NA
Gohir.D12G024850.1	Gohir.D12G024850	0	2.152	EC	plasma membrane intrinsic protein 2;4	NA
Gohir.A06G101502.1	Gohir.A06G101502	0	2.144	EC	0	0
Gohir.A13G026350.1	Gohir.A13G026350	0	2.144	EC	0	NA
Gohir.D06G129150.1	Gohir.D06G129150	0	2.064	EC	NA	NA
Gohir.A12G055750.1	Gohir.A12G055750	0	2	EC	NA	NA
Gohir.D05G260150.1	Gohir.D05G260150	0	1.985	EC	Arabidopsis defensin-like protein	NA
Gohir.A03G014000.1	Gohir.A03G014000	0	1.975	EC	Bifunctional inhibitor/lipid-transfer protein/seed storage 2S albumin superfamily protein	NA
Gohir.D06G180150.1	Gohir.D06G180150	0	1.956	EC	Serine protease inhibitor (SERPIN) family protein	serpin domain containing protein, putative, expressed; Serine protease inhibitor (SERPIN) family protein
Gohir.A07G184600.1	Gohir.A07G184600	0	1.953	EC	P-loop containing nucleoside triphosphate hydrolases superfamily protein	expressed protein; P-loop containing nucleoside triphosphate hydrolases superfamily protein
Gohir.A01G183400.1	Gohir.A01G183400	0	1.945	EC	tubulin alpha-5	tubulin/FtsZ domain containing protein, putative, expressed; alpha-1 tubulin
Gohir.D11G224300.1	Gohir.D11G224300	0	1.918	EC	0	NA
Gohir.A07G129550.1	Gohir.A07G129550	0	1.916	EC	NA	NA
Gohir.D10G088300.1	Gohir.D10G088300	0	1.914	EC	0	NA
Gohir.D05G054800.2	Gohir.D05G054800	0	1.908	EC	0	NA
Gohir.A12G100300.1	Gohir.A12G100300	0	1.905	EC	Lactoylglutathione lyase / glyoxalase I family protein	glyoxalase family protein, putative, expressed; Lactoylglutathione lyase / glyoxalase I family protein
Gohir.D02G109100.1	Gohir.D02G109100	0	1.854	EC	0	NA
Gohir.D12G154600.1	Gohir.D12G154600	0	1.854	EC	CLAVATA3/ESR-RELATED 17	NA
Gohir.A10G184900.2	Gohir.A10G184900	0	1.851	EC	0	NA
Gohir.A02G009116.1	Gohir.A02G009116	0	1.838	EC	NA	NA
Gohir.A12G061600.2	Gohir.A12G061600	0	1.823	EC	0	NA
Gohir.D12G006350.1	Gohir.D12G006350	0	1.814	EC	NA	NA
Gohir.D13G042751.1	Gohir.D13G042751	0	1.814	EC	0	NA
Gohir.D01G116666.1	Gohir.D01G116666	0	1.802	EC	NA	ATP synthase protein MI25, putative, expressed; hydrogen ion transporting ATP synthases, rotational mechanism;zinc ion binding
Gohir.D11G214500.1	Gohir.D11G214500	0	1.802	EC	0	NA
Gohir.D12G019100.1	Gohir.D12G019100	0	1.785	EC	phytosulfokine 5 precursor	NA
Gohir.A04G127300.2	Gohir.A04G127300	0	1.774	EC	0	NA
Gohir.D02G146500.2	Gohir.D02G146500	0	1.748	EC	0	NA
Gohir.A07G104400.1	Gohir.A07G104400	0	1.732	EC	Heavy metal transport/detoxification superfamily protein	heavy metal-associated domain containing protein, expressed; Heavy metal transport/detoxification superfamily protein
Gohir.D04G118400.1	Gohir.D04G118400	0	1.689	EC	Plant protein 1589 of unknown function	plant-specific domain TIGR01589 family protein, expressed; Plant protein 1589 of unknown function
Gohir.D07G022650.1	Gohir.D07G022650	0	1.682	EC	NA	NA
Gohir.A03G000003.1	Gohir.A03G000003	0	1.657	EC	0	NA
Gohir.D11G220000.1	Gohir.D11G220000	0	1.642	EC	0	expressed protein
Gohir.D02G239250.1	Gohir.D02G239250	0	1.617	EC	Plant protein of unknown function (DUF247)	NA
Gohir.D08G106300.3	Gohir.D08G106300	0	1.612	EC	AGAMOUS-like 20	NA
Gohir.A08G110300.1	Gohir.A08G110300	0	1.582	EC	0	NA
Gohir.D07G139975.1	Gohir.D07G139975	0	1.571	EC	0	NA
Gohir.D06G088900.4	Gohir.D06G088900	0	1.565	EC	0	NA
Gohir.A03G210001.1	Gohir.A03G210001	0	1.564	EC	Plant self-incompatibility protein S1 family	NA
Gohir.A06G137802.1	Gohir.A06G137802	0	1.562	EC	bromodomain and extraterminal domain protein 10	NA
Gohir.D04G101120.1	Gohir.D04G101120	0	1.562	EC	Cytochrome b561/ferric reductase transmembrane protein family	NA
Gohir.D10G114350.1	Gohir.D10G114350	0	1.562	EC	NA	NA
Gohir.A01G157400.1	Gohir.A01G157400	0	1.54	EC	NA	NA
Gohir.A10G094900.1	Gohir.A10G094900	0	1.532	EC	0	expressed protein
Gohir.D06G220400.1	Gohir.D06G220400	0	1.522	EC	NA	NA
Gohir.A04G133050.1	Gohir.A04G133050	0	1.518	EC	Sodium Bile acid symporter family	bile acid sodium symporter family protein, putative, expressed; Sodium Bile acid symporter family
Gohir.D05G272266.1	Gohir.D05G272266	0	1.514	EC	0	NA
Gohir.D10G250250.1	Gohir.D10G250250	0	1.514	EC	Photosystem I, PsaA/PsaB protein	photosystem I P700 chlorophyll a apoprotein A1, putative, expressed; Photosystem I, PsaA/PsaB protein
Gohir.D11G198200.2	Gohir.D11G198200	0	1.504	EC	0	expressed protein
Gohir.D07G151750.1	Gohir.D07G151750	0	1.503	EC	NAD(P)-binding Rossmann-fold superfamily protein	dihydroflavonol-4-reductase, putative, expressed; NAD(P)-binding Rossmann-fold superfamily protein
Gohir.D01G129200.2	Gohir.D01G129200	0	1.498	EC	Protein of unknown function (DUF1639)	expressed protein; Protein of unknown function (DUF1639)
Gohir.A07G079700.1	Gohir.A07G079700	0	1.486	EC	ralf-like 27	NA
Gohir.D02G177660.1	Gohir.D02G177660	0	1.484	EC	NA	NA
Gohir.D03G114000.1	Gohir.D03G114000	0	1.48	EC	Protein of unknown function (DUF 3339)	expressed protein; Protein of unknown function (DUF 3339)
Gohir.A13G096500.1	Gohir.A13G096500	0	1.475	EC	Plant protein 1589 of unknown function	plant-specific domain TIGR01589 family protein, expressed; Plant protein 1589 of unknown function
Gohir.A12G140900.3	Gohir.A12G140900	0	1.468	EC	Histidine kinase-, DNA gyrase B-, and HSP90-like ATPase family protein	NA
Gohir.D09G120100.1	Gohir.D09G120100	0	1.415	EC	0	expressed protein
Gohir.D02G159400.1	Gohir.D02G159400	0	1.408	EC	0	expressed protein
Gohir.A02G017001.1	Gohir.A02G017001	0	1.406	EC	0	NA
Gohir.D09G132401.1	Gohir.D09G132401	0	1.404	EC	NA	NA
Gohir.A13G229700.1	Gohir.A13G229700	0	1.39	EC	0	NA
Gohir.D04G178050.1	Gohir.D04G178050	0	1.387	EC	NA	NA
Gohir.1Z049609.1	Gohir.1Z049609	0	1.375	EC	nuclear factor Y, subunit C1	core histone H2A/H2B/H3/H4, putative, expressed; nuclear factor Y, subunit C1
Gohir.D01G153650.1	Gohir.D01G153650	0	1.367	EC	NA	NA
Gohir.A05G258500.1	Gohir.A05G258500	0	1.366	EC	Arabidopsis defensin-like protein	Arabidopsis defensin-like protein
Gohir.A03G106750.1	Gohir.A03G106750	0	1.365	EC	0	NA
Gohir.D02G110901.1	Gohir.D02G110901	0	1.365	EC	glutathione S-transferase PHI 9	glutathione S-transferase, putative, expressed; glutathione S-transferase PHI 9
Gohir.D09G175650.1	Gohir.D09G175650	0	1.365	EC	NA	NA
Gohir.D12G173750.1	Gohir.D12G173750	0	1.365	EC	NA	NA
Gohir.A03G125100.1	Gohir.A03G125100	0	1.324	EC	Protein of unknown function (DUF 3339)	expressed protein; Protein of unknown function (DUF 3339)
Gohir.A12G093400.1	Gohir.A12G093400	0	1.322	EC	Pollen Ole e 1 allergen and extensin family protein	POEI24 - Pollen Ole e I allergen and extensin family protein precursor, expressed; Pollen Ole e 1 allergen and extensin family protein
Gohir.D04G090816.1	Gohir.D04G090816	0	1.301	EC	photosystem II reaction center protein E	cytochrome b559 subunit alpha, putative, expressed; photosystem II reaction center protein E
Gohir.D04G017480.1	Gohir.D04G017480	0	1.281	EC	NA	NA
Gohir.D12G128100.5	Gohir.D12G128100	0	1.279	EC	WRKY DNA-binding protein 65	WRKY37, expressed; WRKY DNA-binding protein 35
Gohir.D08G178533.1	Gohir.D08G178533	0	1.266	EC	NA	NA
Gohir.A11G123800.1	Gohir.A11G123800	0	1.251	EC	Seed maturation protein	late embryogenesis abundant protein D-34, putative, expressed; Seed maturation protein
Gohir.A03G053100.1	Gohir.A03G053100	0	1.241	EC	Protein of unknown function (DUF 3339)	expressed protein; Protein of unknown function (DUF 3339)
Gohir.D05G021220.1	Gohir.D05G021220	0	1.232	EC	NA	NA
Gohir.A07G165178.1	Gohir.A07G165178	0	1.229	EC	TCP-1/cpn60 chaperonin family protein	T-complex protein, putative, expressed; TCP-1/cpn60 chaperonin family protein
Gohir.A11G222402.1	Gohir.A11G222402	0	1.226	EC	Actin-like ATPase superfamily protein	actin, putative, expressed; Actin-like ATPase superfamily protein
Gohir.D05G349250.1	Gohir.D05G349250	0	1.226	EC	NA	NA
Gohir.A09G104150.1	Gohir.A09G104150	0	1.206	EC	NA	NA
Gohir.A01G019300.1	Gohir.A01G019300	0	1.205	EC	Zinc finger C-x8-C-x5-C-x3-H type family protein	zinc finger/CCCH transcription factor, putative, expressed; Zinc finger C-x8-C-x5-C-x3-H type family protein
Gohir.A10G201450.1	Gohir.A10G201450	0	1.205	EC	ATPase, F0 complex, subunit B/B\', bacterial/chloroplast	ATP synthase B chain, putative, expressed; ATPase, F0 complex, subunit B/B\', bacterial/chloroplast
Gohir.D02G206400.1	Gohir.D02G206400	0	1.195	EC	Gibberellin-regulated family protein	GASR3 - Gibberellin-regulated GASA/GAST/Snakin family protein precursor, expressed; Gibberellin-regulated family protein
Gohir.D07G089401.1	Gohir.D07G089401	0	1.194	EC	NA	NA
Gohir.D01G126900.1	Gohir.D01G126900	0	1.192	EC	0	expressed protein
Gohir.D07G021800.2	Gohir.D07G021800	0	1.18	EC	Protein of unknown function (DUF803)	expressed protein; Protein of unknown function (DUF803)
Gohir.D10G005200.1	Gohir.D10G005200	0	1.174	EC	Terpenoid cyclases/Protein prenyltransferases superfamily protein	terpene synthase, putative, expressed; Terpenoid cyclases/Protein prenyltransferases superfamily protein
Gohir.A06G107402.1	Gohir.A06G107402	0	1.167	EC	NA	NA
Gohir.D10G145801.1	Gohir.D10G145801	0	1.16	EC	peptidase M1 family protein	NA
Gohir.D02G081750.1	Gohir.D02G081750	0	1.154	EC	NA	NA
Gohir.A09G101340.1	Gohir.A09G101340	0	1.149	EC	DNA-directed RNA polymerase family protein	DNA-directed RNA polymerase subunit beta, putative, expressed; DNA-directed RNA polymerase family protein
Gohir.D03G154600.1	Gohir.D03G154600	0	1.14	EC	C-repeat-binding factor 4	dehydration-responsive element-binding protein, putative, expressed; C-repeat-binding factor 4
Gohir.A04G036401.1	Gohir.A04G036401	0	1.132	EC	NA	NA
Gohir.A11G182900.1	Gohir.A11G182900	0	1.132	EC	0	NA
Gohir.D10G059650.1	Gohir.D10G059650	0	1.132	EC	ATPase E1-E2 type family protein / haloacid dehalogenase-like hydrolase family protein	phospholipid-transporting ATPase 4, putative, expressed; ATPase E1-E2 type family protein / haloacid dehalogenase-like hydrolase family protein
Gohir.D13G056650.1	Gohir.D13G056650	0	1.132	EC	CTC-interacting domain 9	NA
Gohir.D09G182300.1	Gohir.D09G182300	0	1.127	EC	RING/U-box superfamily protein	NA
Gohir.D10G215733.1	Gohir.D10G215733	0	1.126	EC	0	protein kinase PKN/PRK1, effector, putative, expressed
Gohir.D09G221100.2	Gohir.D09G221100	0	1.118	EC	0	expressed protein
Gohir.D06G077950.1	Gohir.D06G077950	0	1.112	EC	NA	NA
Gohir.D11G296784.1	Gohir.D11G296784	0	1.112	EC	NA	NA
Gohir.D05G260250.1	Gohir.D05G260250	0	1.104	EC	Arabidopsis defensin-like protein	Arabidopsis defensin-like protein
Gohir.A11G107150.1	Gohir.A11G107150	0	1.103	EC	0	NA
Gohir.D01G185301.1	Gohir.D01G185301	0	1.09	EC	Major facilitator superfamily protein	transporter family protein, putative, expressed; Major facilitator superfamily protein
Gohir.A08G137033.1	Gohir.A08G137033	0	1.085	EC	NA	NA
Gohir.A08G117900.1	Gohir.A08G117900	0	1.084	EC	senescence-associated gene 21	late embryogenesis abundant protein, putative, expressed; senescence-associated gene 21
Gohir.D10G114800.2	Gohir.D10G114800	0	1.075	EC	0	NA
Gohir.D10G134466.1	Gohir.D10G134466	0	1.075	EC	NA	NA
Gohir.D10G211700.1	Gohir.D10G211700	0	1.073	EC	DVL family protein	expressed protein; DVL family protein
Gohir.D04G043150.1	Gohir.D04G043150	0	1.057	EC	NA	NA
Gohir.D06G126233.1	Gohir.D06G126233	0	1.052	EC	ATPase, F0 complex, subunit B/B\', bacterial/chloroplast	ATP synthase B chain, putative, expressed; ATPase, F0 complex, subunit B/B\', bacterial/chloroplast
Gohir.D12G112466.1	Gohir.D12G112466	0	1.031	EC	basic helix-loop-helix (bHLH) DNA-binding superfamily protein	helix-loop-helix DNA-binding domain containing protein, expressed; basic helix-loop-helix (bHLH) DNA-binding superfamily protein
Gohir.A05G126700.3	Gohir.A05G126700	0	1.025	EC	0	NA
Gohir.D13G085600.1	Gohir.D13G085600	0	1.022	EC	0	NA
Gohir.D08G229750.1	Gohir.D08G229750	52.429	0	NEC	Ribosomal protein L18ae/LX family protein	60S ribosomal protein L18a, putative, expressed; Ribosomal protein L18ae/LX family protein
Gohir.D07G179500.2	Gohir.D07G179500	10.763	0	NEC	ROTUNDIFOLIA like 21	expressed protein; ROTUNDIFOLIA like 21
Gohir.D05G008300.1	Gohir.D05G008300	10.452	0	NEC	conserved peptide upstream open reading frame 9	S-adenosyl-l-methionine decarboxylase leader peptide, putative, expressed; conserved peptide upstream open reading frame 9
Gohir.D10G179800.1	Gohir.D10G179800	10.093	0	NEC	0	NA
Gohir.D06G144900.2	Gohir.D06G144900	8.163	0	NEC	0	NA
Gohir.A11G280900.1	Gohir.A11G280900	6.565	0	NEC	0	NA
Gohir.D04G048900.1	Gohir.D04G048900	6.482	0	NEC	GAST1 protein homolog 4	GASR7 - Gibberellin-regulated GASA/GAST/Snakin family protein precursor, expressed; GAST1 protein homolog 4
Gohir.D11G295000.1	Gohir.D11G295000	5.939	0	NEC	0	NA
Gohir.D07G064250.1	Gohir.D07G064250	5.533	0	NEC	UDP-Glycosyltransferase superfamily protein	UDP-N-acetylglucosamine--N-acetylmuramyl-pyrophosphor yl-undecaprenol N-acetylglucosamine transferase, putative, expressed; UDP-Glycosyltransferase superfamily protein
Gohir.D05G156101.1	Gohir.D05G156101	5.396	0	NEC	0	NA
Gohir.A11G098200.1	Gohir.A11G098200	4.744	0	NEC	LOB domain-containing protein 11	DUF260 domain containing protein, putative, expressed; Lateral organ boundaries (LOB) domain family protein
Gohir.D05G002150.1	Gohir.D05G002150	4.731	0	NEC	NA	NA
Gohir.A09G040900.1	Gohir.A09G040900	4.574	0	NEC	0	NA
Gohir.D08G061401.1	Gohir.D08G061401	4.373	0	NEC	zinc ion binding	NA
Gohir.D01G122100.1	Gohir.D01G122100	4.204	0	NEC	0	NA
Gohir.D08G188832.1	Gohir.D08G188832	4.173	0	NEC	0	NA
Gohir.A11G265900.1	Gohir.A11G265900	4.096	0	NEC	nuclear factor Y, subunit B5	histone-like transcription factor and archaeal histone, putative, expressed; nuclear factor Y, subunit B5
Gohir.A05G206300.1	Gohir.A05G206300	4.071	0	NEC	0	NA
Gohir.D02G237000.1	Gohir.D02G237000	3.917	0	NEC	0	expressed protein
Gohir.D09G053440.1	Gohir.D09G053440	3.625	0	NEC	methyl esterase 12	esterase, putative, expressed; methyl esterase 14
Gohir.A07G194266.1	Gohir.A07G194266	3.475	0	NEC	0	NA
Gohir.A05G007400.1	Gohir.A05G007400	3.46	0	NEC	conserved peptide upstream open reading frame 9	S-adenosyl-l-methionine decarboxylase leader peptide, putative, expressed; conserved peptide upstream open reading frame 9
Gohir.A10G084407.1	Gohir.A10G084407	3.388	0	NEC	0	0
Gohir.D11G086150.1	Gohir.D11G086150	3.127	0	NEC	NA	NA
Gohir.A06G131100.1	Gohir.A06G131100	3.045	0	NEC	0	expressed protein
Gohir.D11G159600.1	Gohir.D11G159600	3.014	0	NEC	RING/U-box superfamily protein	NA
Gohir.A06G156300.1	Gohir.A06G156300	2.868	0	NEC	0	expressed protein
Gohir.D11G019401.1	Gohir.D11G019401	2.698	0	NEC	0	NA
Gohir.D04G022372.1	Gohir.D04G022372	2.676	0	NEC	Protein of unknown function (DUF1664)	expressed protein; Protein of unknown function (DUF1664)
Gohir.A10G192450.1	Gohir.A10G192450	2.649	0	NEC	NA	NA
Gohir.D09G144800.1	Gohir.D09G144800	2.644	0	NEC	0	NA
Gohir.D08G077700.1	Gohir.D08G077700	2.615	0	NEC	isopentenyltransferase 3	IPP transferase, putative, expressed; isopentenyltransferase 3
Gohir.D02G199750.1	Gohir.D02G199750	2.608	0	NEC	sequence-specific DNA binding transcription factors;transcription regulators	conserved peptide upstream open reading frame 37
Gohir.A07G050100.1	Gohir.A07G050100	2.542	0	NEC	WRKY DNA-binding protein 75	WRKY72, expressed; WRKY DNA-binding protein 75
Gohir.A07G083901.1	Gohir.A07G083901	2.519	0	NEC	VQ motif-containing protein	NA
Gohir.A06G022300.1	Gohir.A06G022300	2.496	0	NEC	0	NA
Gohir.A06G141100.1	Gohir.A06G141100	2.491	0	NEC	0	NA
Gohir.A06G143500.1	Gohir.A06G143500	2.381	0	NEC	0	expressed protein
Gohir.A10G175150.1	Gohir.A10G175150	2.318	0	NEC	0	NA
Gohir.D13G094300.1	Gohir.D13G094300	2.246	0	NEC	SAUR-like auxin-responsive protein family	OsSAUR31 - Auxin-responsive SAUR gene family member, expressed; SAUR-like auxin-responsive protein family
Gohir.A07G107866.1	Gohir.A07G107866	2.174	0	NEC	Enoyl-CoA hydratase/isomerase family	NA
Gohir.D05G361300.1	Gohir.D05G361300	2.151	0	NEC	0	NA
Gohir.A10G132575.1	Gohir.A10G132575	2.144	0	NEC	NA	NA
Gohir.A13G058500.1	Gohir.A13G058500	2.078	0	NEC	Protein of unknown function (DUF1218)	expressed protein; Protein of unknown function (DUF1218)
Gohir.D13G062600.1	Gohir.D13G062600	2.042	0	NEC	0	NA
Gohir.A11G207600.1	Gohir.A11G207600	1.985	0	NEC	0	NA
Gohir.D07G175466.1	Gohir.D07G175466	1.963	0	NEC	NA	NA
Gohir.D10G000266.1	Gohir.D10G000266	1.941	0	NEC	0	NA
Gohir.A09G033580.1	Gohir.A09G033580	1.888	0	NEC	0	expressed protein
Gohir.A07G168701.1	Gohir.A07G168701	1.884	0	NEC	ROTUNDIFOLIA like 21	expressed protein; ROTUNDIFOLIA like 21
Gohir.A08G216600.1	Gohir.A08G216600	1.884	0	NEC	0	NA
Gohir.A12G078200.1	Gohir.A12G078200	1.884	0	NEC	0	expressed protein
Gohir.A13G123900.1	Gohir.A13G123900	1.884	0	NEC	0	NA
Gohir.D01G136250.1	Gohir.D01G136250	1.884	0	NEC	NA	NA
Gohir.D07G212050.1	Gohir.D07G212050	1.884	0	NEC	0	0
Gohir.D11G124850.1	Gohir.D11G124850	1.859	0	NEC	Ankyrin repeat family protein	NA
Gohir.D05G246200.1	Gohir.D05G246200	1.853	0	NEC	0	NA
Gohir.A06G029700.1	Gohir.A06G029700	1.835	0	NEC	hydroxyproline-rich glycoprotein family protein	hydroxyproline-rich glycoprotein family protein
Gohir.D02G143100.1	Gohir.D02G143100	1.83	0	NEC	MLP-like protein 31	pathogenesis-related Bet v I family protein, putative, expressed; MLP-like protein 31
Gohir.A01G061100.1	Gohir.A01G061100	1.824	0	NEC	homeobox protein 52	homeobox associated leucine zipper, putative, expressed; homeobox protein 52
Gohir.A10G043000.1	Gohir.A10G043000	1.762	0	NEC	0	NA
Gohir.D06G020000.1	Gohir.D06G020000	1.742	0	NEC	ARM-repeat/Tetratricopeptide repeat (TPR)-like protein	expressed protein; ARM-repeat/Tetratricopeptide repeat (TPR)-like protein
Gohir.D11G181700.1	Gohir.D11G181700	1.727	0	NEC	Pathogenesis-related thaumatin superfamily protein	thaumatin, putative, expressed; Pathogenesis-related thaumatin superfamily protein
Gohir.A03G215500.6	Gohir.A03G215500	1.714	0	NEC	0	expressed protein
Gohir.A04G094500.1	Gohir.A04G094500	1.708	0	NEC	0	NA
Gohir.A12G101100.1	Gohir.A12G101100	1.686	0	NEC	SAUR-like auxin-responsive protein family	OsSAUR11 - Auxin-responsive SAUR gene family member, expressed; SAUR-like auxin-responsive protein family
Gohir.D13G103100.1	Gohir.D13G103100	1.666	0	NEC	arabinogalactan protein 14	NA
Gohir.D01G074600.1	Gohir.D01G074600	1.657	0	NEC	0	NA
Gohir.D01G112300.1	Gohir.D01G112300	1.657	0	NEC	0	NA
Gohir.D05G323333.1	Gohir.D05G323333	1.655	0	NEC	NA	NA
Gohir.D02G231601.1	Gohir.D02G231601	1.623	0	NEC	Plant self-incompatibility protein S1 family	NA
Gohir.D05G276000.1	Gohir.D05G276000	1.609	0	NEC	TCP family transcription factor	TCP family transcription factor, putative, expressed; TCP family transcription factor
Gohir.D11G274500.1	Gohir.D11G274500	1.608	0	NEC	0	NA
Gohir.D08G139220.1	Gohir.D08G139220	1.587	0	NEC	0	NA
Gohir.D11G089000.1	Gohir.D11G089000	1.587	0	NEC	0	NA
Gohir.D11G222600.1	Gohir.D11G222600	1.574	0	NEC	glutathione S-transferase phi 8	glutathione S-transferase, putative, expressed; glutathione S-transferase phi 8
Gohir.D01G123700.1	Gohir.D01G123700	1.571	0	NEC	0	NA
Gohir.A07G024600.1	Gohir.A07G024600	1.538	0	NEC	0	NA
Gohir.A12G117000.1	Gohir.A12G117000	1.502	0	NEC	brassinosteroid-responsive RING-H2	NA
Gohir.D02G047150.1	Gohir.D02G047150	1.494	0	NEC	NA	NA
Gohir.A08G091300.1	Gohir.A08G091300	1.485	0	NEC	0	NA
Gohir.D09G201550.1	Gohir.D09G201550	1.475	0	NEC	NA	NA
Gohir.A08G114450.1	Gohir.A08G114450	1.473	0	NEC	isoprenoid F	2-C-methyl-D-erythritol 2,4-cyclodiphosphate synthase, chloroplast precursor, putative, expressed; isoprenoid F
Gohir.A01G179100.1	Gohir.A01G179100	1.465	0	NEC	basic helix-loop-helix (bHLH) DNA-binding superfamily protein	helix-loop-helix DNA-binding domain containing protein, expressed; basic helix-loop-helix (bHLH) DNA-binding superfamily protein
Gohir.D10G048100.1	Gohir.D10G048100	1.464	0	NEC	LOB domain-containing protein 4	DUF260 domain containing protein, putative, expressed; LOB domain-containing protein 4
Gohir.D11G330275.1	Gohir.D11G330275	1.462	0	NEC	LRR and NB-ARC domains-containing disease resistance protein	NA
Gohir.D04G111266.1	Gohir.D04G111266	1.461	0	NEC	PapD-like superfamily protein	MSP domain containing protein, putative, expressed; PapD-like superfamily protein
Gohir.D01G219300.1	Gohir.D01G219300	1.445	0	NEC	Protein of unknown function, DUF538	DUF538 domain containing protein, putative, expressed; Protein of unknown function, DUF538
Gohir.D11G157400.1	Gohir.D11G157400	1.444	0	NEC	0	0
Gohir.D03G159600.1	Gohir.D03G159600	1.414	0	NEC	protein binding	NA
Gohir.A08G170632.1	Gohir.A08G170632	1.412	0	NEC	0	NA
Gohir.A10G203600.1	Gohir.A10G203600	1.383	0	NEC	DVL family protein	expressed protein; DVL family protein
Gohir.A11G001300.1	Gohir.A11G001300	1.36	0	NEC	myb domain protein 66	MYB family transcription factor, putative, expressed; myb domain protein 66
Gohir.A11G128300.1	Gohir.A11G128300	1.322	0	NEC	Serine protease inhibitor, potato inhibitor I-type family protein	NA
Gohir.D01G069200.1	Gohir.D01G069200	1.318	0	NEC	Stigma-specific Stig1 family protein	NA
Gohir.D05G230200.1	Gohir.D05G230200	1.312	0	NEC	0	expressed protein
Gohir.D07G088000.1	Gohir.D07G088000	1.312	0	NEC	0	NA
Gohir.D13G014600.1	Gohir.D13G014600	1.31	0	NEC	Heavy metal transport/detoxification superfamily protein	heavy metal-associated domain containing protein, expressed; Heavy metal transport/detoxification superfamily protein
Gohir.A09G099501.1	Gohir.A09G099501	1.304	0	NEC	pathogenesis-related gene 1	SCP-like extracellular protein, expressed; pathogenesis-related gene 1
Gohir.D08G098466.1	Gohir.D08G098466	1.281	0	NEC	alpha/beta-Hydrolases superfamily protein	lecithine cholesterol acyltransferase, putative, expressed; alpha/beta-Hydrolases superfamily protein
Gohir.A05G305100.1	Gohir.A05G305100	1.241	0	NEC	basic helix-loop-helix (bHLH) DNA-binding superfamily protein	bHLH family protein, putative, expressed; basic helix-loop-helix (bHLH) DNA-binding superfamily protein
Gohir.A11G183500.1	Gohir.A11G183500	1.223	0	NEC	RAD-like 6	MYB family transcription factor, putative, expressed; RAD-like 4
Gohir.A07G014066.1	Gohir.A07G014066	1.207	0	NEC	photosystem II subunit X	ultraviolet-B-repressible protein, putative, expressed; photosystem II subunit X
Gohir.A12G227000.1	Gohir.A12G227000	1.203	0	NEC	Protein of unknown function (DUF567)	DUF567 domain containing protein, putative, expressed; Protein of unknown function (DUF567)
Gohir.A12G070000.2	Gohir.A12G070000	1.202	0	NEC	CDPK-related kinase	CAMK_CAMK_like.36 - CAMK includes calcium/calmodulin depedent protein kinases, expressed; CDPK-related kinase
Gohir.A03G067200.1	Gohir.A03G067200	1.197	0	NEC	0	NA
Gohir.A10G049600.1	Gohir.A10G049600	1.196	0	NEC	ROTUNDIFOLIA like 9	expressed protein; ROTUNDIFOLIA like 10
Gohir.D11G290350.1	Gohir.D11G290350	1.193	0	NEC	disease resistance protein (TIR-NBS-LRR class), putative	NA
Gohir.A01G190300.1	Gohir.A01G190300	1.188	0	NEC	K-box region and MADS-box transcription factor family protein	OsMADS4 - MADS-box family gene with MIKCc type-box, expressed; K-box region and MADS-box transcription factor family protein
Gohir.A10G169550.1	Gohir.A10G169550	1.183	0	NEC	0	NA
Gohir.D04G037650.1	Gohir.D04G037650	1.175	0	NEC	Ribosomal protein L14	ribosomal protein L14, putative, expressed; Ribosomal protein L14
Gohir.A02G052202.1	Gohir.A02G052202	1.155	0	NEC	NA	NA
Gohir.D12G073900.2	Gohir.D12G073900	1.148	0	NEC	K+ uptake transporter 3	potassium transporter, putative, expressed; K+ uptake transporter 3
Gohir.A09G105550.1	Gohir.A09G105550	1.135	0	NEC	NA	NA
Gohir.D12G258600.1	Gohir.D12G258600	1.122	0	NEC	actin depolymerizing factor 7	actin-depolymerizing factor, putative, expressed; actin depolymerizing factor 7
Gohir.D08G085850.1	Gohir.D08G085850	1.119	0	NEC	NA	NA
Gohir.A03G017180.1	Gohir.A03G017180	1.11	0	NEC	NA	NA
Gohir.D05G156400.1	Gohir.D05G156400	1.097	0	NEC	0	NA
Gohir.A05G094000.1	Gohir.A05G094000	1.096	0	NEC	0	NA
Gohir.D06G019200.1	Gohir.D06G019200	1.094	0	NEC	Domain of unknown function (DUF303)	receptor protein kinase, putative, expressed; Domain of unknown function (DUF303)
Gohir.A06G191701.1	Gohir.A06G191701	1.093	0	NEC	beta-ureidopropionase	NA
Gohir.A07G137450.1	Gohir.A07G137450	1.093	0	NEC	beta-ureidopropionase	NA
Gohir.D01G110733.1	Gohir.D01G110733	1.093	0	NEC	beta-ureidopropionase	NA
Gohir.D01G130550.1	Gohir.D01G130550	1.093	0	NEC	beta-ureidopropionase	NA
Gohir.D02G092980.1	Gohir.D02G092980	1.093	0	NEC	beta-ureidopropionase	NA
Gohir.D13G120332.1	Gohir.D13G120332	1.093	0	NEC	beta-ureidopropionase	NA
Gohir.A05G352200.1	Gohir.A05G352200	1.091	0	NEC	0	NA
Gohir.A05G336900.3	Gohir.A05G336900	1.081	0	NEC	NAD(P)-binding Rossmann-fold superfamily protein	oxidoreductase, short chain dehydrogenase/reductase family protein, putative, expressed; NAD(P)-binding Rossmann-fold superfamily protein
Gohir.D12G023400.1	Gohir.D12G023400	1.081	0	NEC	S-adenosyl-L-methionine-dependent methyltransferases superfamily protein	caffeoyl-CoA O-methyltransferase, putative, expressed; S-adenosyl-L-methionine-dependent methyltransferases superfamily protein
Gohir.A01G088733.1	Gohir.A01G088733	1.072	0	NEC	ytochrome p450, family 71, subfamily B, polypeptide 11	cytochrome P450, putative, expressed; cytochrome P450, family 71, subfamily B, polypeptide 4
Gohir.D10G033200.1	Gohir.D10G033200	1.068	0	NEC	Nodulin MtN3 family protein	nodulin MtN3 family protein, putative, expressed; Nodulin MtN3 family protein
Gohir.D12G119050.1	Gohir.D12G119050	1.067	0	NEC	Basic helix-loop-helix (bHLH) DNA-binding family protein	transcription factor MYC7E, putative, expressed; Basic helix-loop-helix (bHLH) DNA-binding family protein
Gohir.D04G023200.1	Gohir.D04G023200	1.059	0	NEC	0	NA
Gohir.A11G286000.1	Gohir.A11G286000	1.057	0	NEC	NAC (No Apical Meristem) domain transcriptional regulator superfamily protein	no apical meristem protein, putative, expressed; NAC (No Apical Meristem) domain transcriptional regulator superfamily protein
Gohir.A06G053951.1	Gohir.A06G053951	1.054	0	NEC	NA	NA
Gohir.D08G175550.1	Gohir.D08G175550	1.047	0	NEC	XS domain-containing protein / XS zinc finger domain-containing protein-related	NA
Gohir.D03G122800.1	Gohir.D03G122800	1.042	0	NEC	0	NA
Gohir.A05G140400.1	Gohir.A05G140400	1.034	0	NEC	Duplicated homeodomain-like superfamily protein	myb-like DNA-binding domain containing protein, putative, expressed; Duplicated homeodomain-like superfamily protein
Gohir.D02G217900.1	Gohir.D02G217900	1.033	0	NEC	0	expressed protein
Gohir.D05G158100.1	Gohir.D05G158100	1.028	0	NEC	0	NA
Gohir.D08G175500.2	Gohir.D08G175500	1.028	0	NEC	BLISTER	NA
Gohir.D03G091900.1	Gohir.D03G091900	1.015	0	NEC	RNA 2\'-phosphotransferase, Tpt1 / KptA family	tRNA 2-phosphotransferase 1, putative, expressed; RNA 2\'-phosphotransferase, Tpt1 / KptA family
Gohir.D10G020250.1	Gohir.D10G020250	1.007	0	NEC	0	NA
Gohir.A03G202500.1	Gohir.A03G202500	1.004	0	NEC	SAUR-like auxin-responsive protein family	OsSAUR9 - Auxin-responsive SAUR gene family member, expressed; SAUR-like auxin-responsive protein family
