# Supplementary material for: Transcriptomic profiles of non-embryogenic and embryogenic callus cells in a highly regenerative upland cotton line (Gossypium hirsutum L.)
Source: BMC Dev Biol. 2020 Dec 2;20:25. doi: 10.1186/s12861-020-00230-4 (PMC7713314; doi:10.1186/s12861-020-00230-4)
Supplement: Supplementary file 4 — Additional file 4. Gene Ontology enrichment of genes downregulated EC (>=1 fold change). Gene ontology classification results of genes that are downregulated at least 1FC in embryogenic callus when compared to nonembryogenic callus. [file 12861_2020_230_MOESM4_ESM.xlsx]

## Sheet: Sheet1
Table S4. Gene Ontology enrichment of genes downregulated EC (>=1 fold change).
category	over_represented_pvalue	under_represented_pvalue	numDEInCat	numInCat	term	ontology	over_represented_FDR	go_term	gene_ids
GO:0055114	1.31667e-27	1	524	3378	oxidation-reduction process	BP	2.9546e-24	BP oxidation-reduction process	Gohir.A05G191700.1, Gohir.A05G191700.1, Gohir.A05G191700.1, Gohir.D12G065000.1, Gohir.D12G065000.1, Gohir.D12G065000.1, Gohir.D13G036850.1, Gohir.D13G036850.1, Gohir.D13G036850.1, Gohir.D08G079150.1, Gohir.D12G144500.1, Gohir.D12G144500.1, Gohir.D12G144500.1, Gohir.D01G119500.1, Gohir.D01G119500.1, Gohir.D01G119500.1, Gohir.D01G119500.1, Gohir.D12G176500.2, Gohir.A08G055400.1, Gohir.A13G152700.1,…
GO:0003677	2.86903e-05	0.999977	413	3711	DNA binding	MF	0.00207681	MF DNA binding	Gohir.D01G085625.1, Gohir.A10G125000.1, Gohir.A09G240166.1, Gohir.D05G116900.2, Gohir.D03G040600.1, Gohir.D05G190900.1, Gohir.D05G190900.1, Gohir.A07G138700.1, Gohir.A07G019900.1, Gohir.D01G053900.2, Gohir.D09G240950.1, Gohir.A03G033200.2, Gohir.D11G074500.1, Gohir.A08G102900.1, Gohir.D06G034300.1, Gohir.A03G098800.1, Gohir.D10G245300.1, Gohir.A09G160800.1, Gohir.A06G037400.1, Gohir.D12G105900.1,…
GO:0006355	3.05719e-11	1	362	2761	regulation of transcription, DNA-templated	BP	8.57541e-09	BP regulation of transcription, DNA-templated	Gohir.D01G085625.1, Gohir.A10G125000.1, Gohir.A09G240166.1, Gohir.D07G088100.1, Gohir.D03G040600.1, Gohir.D03G040600.1, Gohir.D05G190900.1, Gohir.A11G096100.1, Gohir.D01G053900.2, Gohir.D09G240950.1, Gohir.A05G053500.1, Gohir.D11G074500.1, Gohir.A08G102900.1, Gohir.A08G102900.1, Gohir.D06G034300.1, Gohir.D06G034300.1, Gohir.A06G037400.1, Gohir.D03G022800.1, Gohir.D12G105900.1, Gohir.D08G194200.1,…
GO:0016020	0.000676198	0.999461	299	2570	membrane	CC	0.0257185	CC membrane	Gohir.A05G008500.1, Gohir.A11G271300.1, Gohir.A11G271300.1, Gohir.A11G271300.1, Gohir.D04G086200.1, Gohir.A09G189400.1, Gohir.A05G009200.1, Gohir.D06G033600.1, Gohir.D05G236400.1, Gohir.D09G166200.1, Gohir.D03G161700.1, Gohir.D03G161700.1, Gohir.A05G338200.2, Gohir.A05G338200.2, Gohir.A01G090800.1, Gohir.A05G022200.1, Gohir.D01G186900.1, Gohir.A13G166900.1, Gohir.D05G094300.1, Gohir.D05G000600.1,…
GO:0003824	3.33641e-05	0.999975	285	2268	catalytic activity	MF	0.00213911	MF catalytic activity	Gohir.A03G051000.1, Gohir.D05G211000.2, Gohir.D02G056300.2, Gohir.A11G306500.5, Gohir.D03G085233.1, Gohir.D09G144700.1, Gohir.D10G178901.1, Gohir.A10G127300.1, Gohir.A01G023400.1, Gohir.D02G005800.1, Gohir.D13G216800.1, Gohir.A05G109500.1, Gohir.D07G070700.1, Gohir.D07G027100.1, Gohir.D07G027100.1, Gohir.D08G173400.1, Gohir.D04G144000.1, Gohir.A05G110600.1, Gohir.D02G178100.1, Gohir.D02G178100.1,…
GO:0016491	2.00767e-13	1	265	1751	oxidoreductase activity	MF	6.43603e-11	MF oxidoreductase activity	Gohir.D12G065000.1, Gohir.D12G176500.2, Gohir.A08G055400.1, Gohir.A13G152700.1, Gohir.D06G130000.1, Gohir.D12G212800.1, Gohir.A03G110400.2, Gohir.D07G070700.1, Gohir.A12G246300.2, Gohir.A07G183700.1, Gohir.A11G068700.1, Gohir.A04G091100.1, Gohir.A04G091100.1, Gohir.A08G222400.1, Gohir.A06G007700.1, Gohir.A06G007700.1, Gohir.D05G327800.1, Gohir.D05G327800.1, Gohir.A05G013300.2, Gohir.D02G019401.1,…
GO:0055085	4.69033e-08	1	233	1651	transmembrane transport	BP	6.57819e-06	BP transmembrane transport	Gohir.A05G108800.2, Gohir.D03G117400.1, Gohir.D06G033600.1, Gohir.D03G161700.1, Gohir.A05G022200.1, Gohir.D01G186900.1, Gohir.A13G166900.1, Gohir.D05G094300.1, Gohir.D05G000600.1, Gohir.D09G159600.1, Gohir.D05G023700.1, Gohir.D09G139500.3, Gohir.A03G038500.1, Gohir.A05G188800.1, Gohir.D10G032600.1, Gohir.D12G170100.1, Gohir.D01G145100.1, Gohir.D13G068800.1, Gohir.D05G132000.1, Gohir.D01G203800.2,…
GO:0008152	7.15215e-06	0.999995	217	1637	metabolic process	BP	0.000729519	BP metabolic process	Gohir.D13G178200.1, Gohir.A13G224766.1, Gohir.A05G225300.1, Gohir.A03G051000.1, Gohir.A13G042800.1, Gohir.D10G178901.1, Gohir.A01G023400.1, Gohir.A12G049600.2, Gohir.D11G308720.1, Gohir.D13G216800.1, Gohir.D06G130000.1, Gohir.A01G200900.1, Gohir.D05G204400.1, Gohir.D04G054766.1, Gohir.D08G173400.1, Gohir.A05G110600.1, Gohir.A04G091100.1, Gohir.A04G091100.1, Gohir.D06G155400.2, Gohir.A01G079200.1,…
GO:0003700	1.81732e-09	1	212	1536	DNA-binding transcription factor activity	MF	3.13697e-07	MF DNA-binding transcription factor activity	Gohir.A10G125000.1, Gohir.A09G240166.1, Gohir.D07G088100.1, Gohir.D03G040600.1, Gohir.A11G096100.1, Gohir.D09G240950.1, Gohir.A08G102900.1, Gohir.D06G034300.1, Gohir.A06G037400.1, Gohir.D03G022800.1, Gohir.D12G105900.1, Gohir.A12G215000.1, Gohir.D07G029400.1, Gohir.A06G092900.1, Gohir.A08G097550.1, Gohir.A08G097550.1, Gohir.A13G099300.1, Gohir.D06G103300.1, Gohir.D11G014200.1, Gohir.A03G188600.1,…
GO:0020037	3.85595e-14	1	189	1133	heme binding	MF	1.44212e-11	MF heme binding	Gohir.D13G036850.1, Gohir.D13G036850.1, Gohir.D12G144500.1, Gohir.D12G144500.1, Gohir.A02G004850.1, Gohir.D06G100300.1, Gohir.A11G134700.1, Gohir.A10G193100.1, Gohir.D09G048100.1, Gohir.D02G029600.1, Gohir.D13G085000.1, Gohir.A11G302400.1, Gohir.A05G198400.2, Gohir.D08G178700.1, Gohir.D08G194740.1, Gohir.D12G161200.1, Gohir.D03G157200.2, Gohir.A12G185666.1, Gohir.D06G011700.1, Gohir.D04G013800.1,…
GO:0005506	2.85968e-10	1	153	938	iron ion binding	MF	5.83375e-08	MF iron ion binding	Gohir.D13G036850.1, Gohir.D13G036850.1, Gohir.D12G144500.1, Gohir.D12G144500.1, Gohir.A02G004850.1, Gohir.A11G134700.1, Gohir.A11G068700.1, Gohir.A10G193100.1, Gohir.D09G048100.1, Gohir.D02G029600.1, Gohir.D13G085000.1, Gohir.A11G302400.1, Gohir.A05G198400.2, Gohir.D08G178700.1, Gohir.D08G194740.1, Gohir.D03G157200.2, Gohir.A12G185666.1, Gohir.D06G011700.1, Gohir.A06G014800.1, Gohir.D12G222900.1,…
GO:0005975	4.36444e-05	0.999971	152	1114	carbohydrate metabolic process	BP	0.0027205	BP carbohydrate metabolic process	Gohir.D10G004700.1, Gohir.D04G033400.1, Gohir.D03G085233.1, Gohir.A06G145900.1, Gohir.D10G124200.1, Gohir.D07G070700.1, Gohir.A05G074300.1, Gohir.D12G254400.1, Gohir.D12G254400.1, Gohir.D09G116400.1, Gohir.D04G179000.1, Gohir.A09G065800.1, Gohir.A05G187200.1, Gohir.A05G394400.1, Gohir.D07G228400.2, Gohir.A07G025400.1, Gohir.D02G161400.1, Gohir.A09G241700.1, Gohir.A03G029600.1, Gohir.A12G111500.1,…
GO:0046983	1.76555e-10	1	142	921	protein dimerization activity	MF	4.40212e-08	MF protein dimerization activity	Gohir.D11G093000.1, Gohir.A11G034400.3, Gohir.D12G105900.1, Gohir.A05G222800.2, Gohir.D08G222300.1, Gohir.D01G113100.1, Gohir.D02G084200.1, Gohir.A05G167100.1, Gohir.A03G158000.1, Gohir.A12G242200.1, Gohir.D06G031800.1, Gohir.A09G201500.1, Gohir.D02G011866.1, Gohir.D05G334900.1, Gohir.D06G097200.2, Gohir.D10G199000.2, Gohir.D04G080300.1, Gohir.D12G041598.1, Gohir.A10G143800.4, Gohir.D06G028900.1,…
GO:0016705	2.19211e-10	1	138	809	oxidoreductase activity, acting on paired donors, with incorporation or reduction of molecular oxygen	MF	4.9191e-08	MF oxidoreductase activity, acting on paired donors, with incorporation or reduction of molecular oxygen	Gohir.D13G036850.1, Gohir.D13G036850.1, Gohir.D13G036850.1, Gohir.D12G144500.1, Gohir.D12G144500.1, Gohir.D12G144500.1, Gohir.A02G004850.1, Gohir.A02G004850.1, Gohir.A11G134700.1, Gohir.A11G134700.1, Gohir.A11G068700.1, Gohir.A10G193100.1, Gohir.A10G193100.1, Gohir.D09G048100.1, Gohir.D09G048100.1, Gohir.D02G029600.1, Gohir.D02G029600.1, Gohir.D13G085000.1, Gohir.D13G085000.1, Gohir.A11G302400.1,…
GO:0006508	0.00641081	0.995222	117	942	proteolysis	BP	0.141038	BP proteolysis	Gohir.A11G142900.1, Gohir.A03G120900.1, Gohir.A11G196400.1, Gohir.A09G180000.1, Gohir.D05G118300.1, Gohir.A12G012800.1, Gohir.D07G031200.1, Gohir.D10G193000.1, Gohir.A09G066500.1, Gohir.D05G211500.1, Gohir.A05G400100.1, Gohir.A05G139700.1, Gohir.D02G011866.1, Gohir.D12G005200.1, Gohir.D04G134000.2, Gohir.A11G029700.2, Gohir.A11G029700.2, Gohir.A01G204200.1, Gohir.D05G283300.1, Gohir.A11G217500.1,…
GO:0043565	8.47336e-07	1	106	693	sequence-specific DNA binding	MF	0.000100075	MF sequence-specific DNA binding	Gohir.D07G088100.1, Gohir.D03G040600.1, Gohir.D03G040600.1, Gohir.A11G096100.1, Gohir.A08G102900.1, Gohir.A08G102900.1, Gohir.D06G034300.1, Gohir.D06G034300.1, Gohir.D03G022800.1, Gohir.A12G215000.1, Gohir.A12G215000.1, Gohir.D06G103300.1, Gohir.D11G014200.1, Gohir.A11G148900.1, Gohir.A13G072133.1, Gohir.A03G146100.1, Gohir.A03G146100.1, Gohir.A12G175190.1, Gohir.A12G175190.1, Gohir.D06G049200.1,…
GO:0043531	1.48479e-05	0.999991	106	679	ADP binding	MF	0.00123403	MF ADP binding	Gohir.D11G299100.1, Gohir.D13G203300.1, Gohir.A04G045960.1, Gohir.D11G335400.2, Gohir.A08G142200.1, Gohir.D11G042500.2, Gohir.D11G270500.1, Gohir.A02G008000.3, Gohir.D11G165000.1, Gohir.D01G106500.1, Gohir.D11G299600.1, Gohir.D11G335900.3, Gohir.D05G371750.1, Gohir.A11G317300.1, Gohir.A11G284400.2, Gohir.D11G316500.5, Gohir.D11G299250.1, Gohir.D02G168100.1, Gohir.D11G295500.3, Gohir.A01G018380.1,…
GO:0016787	0.00165737	0.998889	86	641	hydrolase activity	MF	0.0531304	MF hydrolase activity	Gohir.D13G178200.1, Gohir.D13G029700.1, Gohir.D05G204400.1, Gohir.A10G094400.1, Gohir.A08G147500.1, Gohir.D08G186000.1, Gohir.D04G181700.3, Gohir.A06G073500.1, Gohir.D11G278800.1, Gohir.D09G056800.1, Gohir.A13G116750.1, Gohir.D03G039100.1, Gohir.D11G346200.1, Gohir.D08G229900.1, Gohir.D05G237901.1, Gohir.D05G237901.1, Gohir.A06G006600.1, Gohir.A03G044000.2, Gohir.A12G118200.2, Gohir.A08G167200.1,…
GO:0022857	0.00524949	0.996317	86	651	transmembrane transporter activity	MF	0.124866	MF transmembrane transporter activity	Gohir.D04G086200.1, Gohir.D05G236400.1, Gohir.D09G166200.1, Gohir.D03G161700.1, Gohir.D05G000600.1, Gohir.D09G139500.3, Gohir.D13G068800.1, Gohir.D05G132000.1, Gohir.A04G111900.1, Gohir.A04G111900.1, Gohir.A12G006900.1, Gohir.A12G006900.1, Gohir.A05G131900.1, Gohir.A13G054300.1, Gohir.A12G225100.1, Gohir.A12G225100.1, Gohir.D10G138900.1, Gohir.A02G041600.1, Gohir.A10G131900.1, Gohir.D02G051100.1,…
GO:0004553	0.00377936	0.997402	83	621	hydrolase activity, hydrolyzing O-glycosyl compounds	MF	0.0974814	MF hydrolase activity, hydrolyzing O-glycosyl compounds	Gohir.D04G033400.1, Gohir.D03G085233.1, Gohir.A06G145900.1, Gohir.A05G074300.1, Gohir.D12G254400.1, Gohir.D09G116400.1, Gohir.A09G065800.1, Gohir.A05G187200.1, Gohir.A03G029600.1, Gohir.D05G111200.1, Gohir.A12G241500.1, Gohir.A13G171700.1, Gohir.D05G277800.1, Gohir.D06G002480.1, Gohir.A01G103200.1, Gohir.D01G088500.1, Gohir.D09G236400.1, Gohir.A09G120200.1, Gohir.D05G174100.1, Gohir.A06G086600.1,…
GO:0008168	1.6058e-05	0.999991	71	438	methyltransferase activity	MF	0.00128694	MF methyltransferase activity	Gohir.A05G109500.1, Gohir.A06G161900.1, Gohir.D06G070400.1, Gohir.A05G266700.4, Gohir.A03G158000.1, Gohir.A12G242200.1, Gohir.A05G267400.1, Gohir.A03G093100.1, Gohir.D01G071300.1, Gohir.A12G202900.1, Gohir.A10G117300.1, Gohir.D10G199000.2, Gohir.D05G109900.2, Gohir.D13G074300.1, Gohir.A02G114300.2, Gohir.A02G114300.2, Gohir.D13G081400.1, Gohir.A06G035200.1, Gohir.A04G027700.1, Gohir.A13G164700.2,…
GO:0007165	0.0273995	0.980328	63	492	signal transduction	BP	0.401054	BP signal transduction	Gohir.D07G029400.1, Gohir.D11G316566.1, Gohir.D02G041900.2, Gohir.A05G217600.1, Gohir.A11G284400.2, Gohir.D02G168100.1, Gohir.D09G214000.1, Gohir.D11G295500.3, Gohir.A11G323700.1, Gohir.A05G006300.1, Gohir.A01G064400.2, Gohir.A13G172900.2, Gohir.A10G231849.1, Gohir.A11G286320.1, Gohir.D11G156200.1, Gohir.A11G283826.1, Gohir.A06G132100.1, Gohir.A10G149400.1, Gohir.D06G097300.1, Gohir.A03G112400.2,…
GO:0006979	2.22109e-08	1	55	270	response to oxidative stress	BP	3.56009e-06	BP response to oxidative stress	Gohir.D06G100300.1, Gohir.D08G253600.1, Gohir.D12G161200.1, Gohir.D12G230200.1, Gohir.D04G013800.1, Gohir.D08G083200.1, Gohir.D02G068700.1, Gohir.D04G154100.1, Gohir.D07G225000.1, Gohir.D10G065800.1, Gohir.D08G213000.1, Gohir.A08G074000.4, Gohir.A12G227900.1, Gohir.D05G337500.1, Gohir.D06G115300.1, Gohir.D03G027300.1, Gohir.A05G401800.1, Gohir.A10G148700.1, Gohir.D08G237300.1, Gohir.A08G220700.1,…
GO:0016747	6.38834e-05	0.999967	54	318	transferase activity, transferring acyl groups other than amino-acyl groups	MF	0.00358386	MF transferase activity, transferring acyl groups other than amino-acyl groups	Gohir.D02G211400.2, Gohir.D05G060000.1, Gohir.D05G182700.1, Gohir.D03G143900.1, Gohir.D02G094700.1, Gohir.A05G331100.1, Gohir.D09G000401.1, Gohir.A11G055700.1, Gohir.A05G052701.1, Gohir.A03G130100.1, Gohir.D13G108800.1, Gohir.D03G112825.1, Gohir.A10G232900.1, Gohir.A06G020300.1, Gohir.A05G179500.1, Gohir.D08G179000.1, Gohir.A03G190500.2, Gohir.A06G193100.1, Gohir.D02G154000.1, Gohir.D10G118900.2,…
GO:0004601	2.07266e-07	1	51	257	peroxidase activity	MF	2.73591e-05	MF peroxidase activity	Gohir.D06G100300.1, Gohir.D06G100300.1, Gohir.D12G161200.1, Gohir.D12G161200.1, Gohir.D12G161200.1, Gohir.D04G013800.1, Gohir.D04G013800.1, Gohir.D04G013800.1, Gohir.D02G068700.1, Gohir.D02G068700.1, Gohir.D02G068700.1, Gohir.D04G154100.1, Gohir.D04G154100.1, Gohir.D04G154100.1, Gohir.D07G225000.1, Gohir.D07G225000.1, Gohir.D07G225000.1, Gohir.A11G267300.1, Gohir.D10G065800.1, Gohir.D10G065800.1,…
GO:0016758	0.00219457	0.998692	51	339	transferase activity, transferring hexosyl groups	MF	0.0647976	MF transferase activity, transferring hexosyl groups	Gohir.A13G224766.1, Gohir.A05G225300.1, Gohir.A13G042800.1, Gohir.A12G049600.2, Gohir.D11G308720.1, Gohir.D10G239400.2, Gohir.A11G323200.1, Gohir.D03G038900.1, Gohir.A12G049700.1, Gohir.A04G069300.1, Gohir.D03G150600.1, Gohir.D02G038600.1, Gohir.D13G041200.1, Gohir.A13G155800.1, Gohir.D13G240200.1, Gohir.D10G239500.3, Gohir.D03G079400.1, Gohir.A03G026300.1, Gohir.A07G195300.1, Gohir.A07G101600.1,…
GO:0009055	0.0281879	0.981003	44	414	electron transfer activity	MF	0.405473	MF electron transfer activity	Gohir.A13G200000.1, Gohir.D13G034500.2, Gohir.D13G034500.2, Gohir.A04G055500.2, Gohir.D11G025050.1, Gohir.D05G016200.1, Gohir.A05G182400.1, Gohir.A07G225100.1, Gohir.A09G084800.1, Gohir.D02G214000.1, Gohir.D02G214000.1, Gohir.A08G058000.1, Gohir.A13G146400.1, Gohir.A13G038800.1, Gohir.A05G015200.1, Gohir.A03G193000.1, Gohir.A03G193000.1, Gohir.D13G119600.1, Gohir.D05G043000.1, Gohir.D07G209100.1,…
GO:0015267	1.60107e-16	1	43	116	channel activity	MF	1.1976e-13	MF channel activity	Gohir.A13G166900.1, Gohir.D09G159600.1, Gohir.A03G038500.1, Gohir.D01G203800.2, Gohir.D06G093500.1, Gohir.D13G017400.1, Gohir.A04G074500.1, Gohir.A09G164100.1, Gohir.D04G113366.1, Gohir.D01G203900.1, Gohir.A05G103200.1, Gohir.A10G233200.1, Gohir.A03G033800.1, Gohir.A10G205800.1, Gohir.D03G129900.1, Gohir.A09G149800.1, Gohir.D05G102900.1, Gohir.D08G008200.1, Gohir.D08G215400.1, Gohir.D08G118100.2,…
GO:0042744	4.14515e-08	1	43	189	hydrogen peroxide catabolic process	BP	6.20115e-06	BP hydrogen peroxide catabolic process	Gohir.D12G161200.1, Gohir.D04G013800.1, Gohir.D02G068700.1, Gohir.D04G154100.1, Gohir.D07G225000.1, Gohir.D10G065800.1, Gohir.D05G337500.1, Gohir.D06G115300.1, Gohir.D03G027300.1, Gohir.A05G401800.1, Gohir.A10G148700.1, Gohir.D08G237300.1, Gohir.A08G220700.1, Gohir.A07G217900.1, Gohir.A03G024000.1, Gohir.D08G088600.1, Gohir.D10G118000.1, Gohir.D01G010900.1, Gohir.D02G111300.1, Gohir.A03G173000.1,…
GO:0050660	0.0227734	0.985051	43	309	flavin adenine dinucleotide binding	MF	0.347643	MF flavin adenine dinucleotide binding	Gohir.D12G065000.1, Gohir.D12G065000.1, Gohir.A06G007700.1, Gohir.A06G007700.1, Gohir.A06G007700.1, Gohir.A06G007700.1, Gohir.A06G007700.1, Gohir.D02G019401.1, Gohir.D02G019401.1, Gohir.D02G019401.1, Gohir.D10G110500.1, Gohir.D10G110500.1, Gohir.D10G110500.1, Gohir.D04G172800.1, Gohir.D10G006600.1, Gohir.D10G006600.1, Gohir.D10G006600.1, Gohir.A10G130300.1, Gohir.A10G130300.1, Gohir.A10G130300.1,…
GO:0008171	6.05082e-19	1	41	91	O-methyltransferase activity	MF	6.78901e-16	MF O-methyltransferase activity	Gohir.D13G040400.1, Gohir.A03G158000.1, Gohir.A12G242200.1, Gohir.A13G041700.1, Gohir.D10G199000.2, Gohir.D04G182050.1, Gohir.A12G022900.2, Gohir.D12G023500.1, Gohir.A13G164700.2, Gohir.D06G069400.1, Gohir.A08G105100.1, Gohir.A03G158100.1, Gohir.A12G242300.1, Gohir.A10G191400.2, Gohir.A03G188300.1, Gohir.D02G181200.1, Gohir.A04G132400.1, Gohir.D10G198900.1, Gohir.D12G243400.1, Gohir.D10G206000.1,…
GO:0005215	0.00165165	0.999104	40	242	transporter activity	MF	0.0531304	MF transporter activity	Gohir.A05G051200.1, Gohir.D03G161700.1, Gohir.A04G111900.1, Gohir.A12G006900.1, Gohir.A05G150400.1, Gohir.A12G225100.1, Gohir.D02G051100.1, Gohir.D13G123200.1, Gohir.D03G161800.1, Gohir.A05G090400.1, Gohir.A09G198000.1, Gohir.D01G009300.1, Gohir.D06G098000.2, Gohir.D05G100600.1, Gohir.A03G009200.1, Gohir.D09G111300.1, Gohir.D03G118300.1, Gohir.A09G020500.1, Gohir.D01G059200.1, Gohir.D10G132200.1,…
GO:0004190	5.58026e-05	0.999975	39	202	aspartic-type endopeptidase activity	MF	0.00321079	MF aspartic-type endopeptidase activity	Gohir.D12G231300.1, Gohir.D05G118300.1, Gohir.D10G193000.1, Gohir.A05G400100.1, Gohir.D12G005200.1, Gohir.A11G089100.1, Gohir.D05G283300.1, Gohir.D05G386600.1, Gohir.D04G149400.1, Gohir.A02G078500.1, Gohir.A05G117400.1, Gohir.D13G127050.1, Gohir.D10G011500.1, Gohir.A05G061900.1, Gohir.A04G003100.1, Gohir.A07G137300.2, Gohir.A07G142100.1, Gohir.D09G132001.1, Gohir.D07G148000.1, Gohir.D05G064400.2,…
GO:0005618	0.00325286	0.998187	38	245	cell wall	CC	0.0879449	CC cell wall	Gohir.A06G145900.1, Gohir.A03G195200.1, Gohir.D06G066300.1, Gohir.D06G081600.1, Gohir.A03G029600.1, Gohir.A05G037100.1, Gohir.A11G014800.1, Gohir.D12G250800.1, Gohir.D08G028200.1, Gohir.A08G017600.1, Gohir.A12G129000.1, Gohir.D05G144000.1, Gohir.D12G219600.1, Gohir.A06G067700.1, Gohir.A05G141600.1, Gohir.D02G142600.1, Gohir.A07G008900.1, Gohir.D06G151900.1, Gohir.D13G063700.1, Gohir.A07G125900.2,…
GO:0030170	0.00347178	0.998077	37	230	pyridoxal phosphate binding	MF	0.0924668	MF pyridoxal phosphate binding	Gohir.A10G127300.1, Gohir.A10G127300.1, Gohir.D02G005800.1, Gohir.D07G027100.1, Gohir.D07G027100.1, Gohir.D02G178100.1, Gohir.D02G178100.1, Gohir.D02G178100.1, Gohir.D07G159400.1, Gohir.D05G265900.1, Gohir.D05G265900.1, Gohir.D05G109900.2, Gohir.D05G233500.1, Gohir.D05G233500.1, Gohir.D02G178200.2, Gohir.D02G178200.2, Gohir.A03G155100.1, Gohir.A03G155100.1, Gohir.A03G155100.1, Gohir.A07G153200.1,…
GO:0015979	4.84838e-05	0.999979	36	282	photosynthesis	BP	0.0028631	BP photosynthesis	Gohir.A04G050200.1, Gohir.A08G188400.1, Gohir.D13G197200.1, Gohir.D08G206800.1, Gohir.D02G038100.1, Gohir.D05G300200.1, Gohir.A03G161000.1, Gohir.D11G133100.1, Gohir.D11G276600.1, Gohir.D05G170500.1, Gohir.A11G248900.1, Gohir.A07G202600.2, Gohir.A13G151300.1, Gohir.D07G158900.1, Gohir.A01G188600.1, Gohir.A11G266300.1, Gohir.A03G160900.1, Gohir.D02G184350.1, Gohir.D08G056700.1, Gohir.D06G146300.1,…
GO:0030001	0.0389425	0.974348	36	297	metal ion transport	BP	0.517083	BP metal ion transport	Gohir.D06G162900.1, Gohir.D05G094300.1, Gohir.D08G134800.1, Gohir.A10G008100.1, Gohir.D08G228300.1, Gohir.A11G263600.1, Gohir.A01G090400.1, Gohir.D03G026100.1, Gohir.A05G093800.1, Gohir.D03G130500.1, Gohir.A03G037900.1, Gohir.A13G013500.1, Gohir.A07G076500.1, Gohir.D10G007900.1, Gohir.A09G191400.1, Gohir.A12G227100.1, Gohir.D13G014600.1, Gohir.A03G028200.1, Gohir.A12G107200.1, Gohir.A07G003700.1,…
GO:0071949	0.000140009	0.999938	35	179	FAD binding	MF	0.0066847	MF FAD binding	Gohir.A06G007700.1, Gohir.D03G064400.1, Gohir.D02G019401.1, Gohir.D10G110500.1, Gohir.D10G006600.1, Gohir.A10G130300.1, Gohir.A03G005400.1, Gohir.D07G011600.1, Gohir.A04G131600.2, Gohir.D11G223300.1, Gohir.D05G113100.1, Gohir.A10G085600.1, Gohir.A11G200400.1, Gohir.A07G011800.1, Gohir.A12G259500.1, Gohir.A10G006400.1, Gohir.D10G102900.1, Gohir.D10G006300.1, Gohir.D10G007000.1, Gohir.D10G117800.1,…
GO:0004857	0.00665079	0.996192	35	263	enzyme inhibitor activity	MF	0.144897	MF enzyme inhibitor activity	Gohir.D06G218900.1, Gohir.D11G230300.1, Gohir.D01G023565.1, Gohir.D01G023565.1, Gohir.D06G081600.1, Gohir.A05G037100.1, Gohir.A11G014800.1, Gohir.D01G142600.1, Gohir.A03G057500.1, Gohir.A12G220300.1, Gohir.D12G250800.1, Gohir.D09G189400.1, Gohir.A12G129000.1, Gohir.D05G144000.1, Gohir.D12G133000.1, Gohir.A05G141600.1, Gohir.D03G108200.1, Gohir.D02G142600.1, Gohir.D08G191400.1, Gohir.A07G125900.2,…
GO:0009733	6.57903e-05	0.999972	34	263	response to auxin	BP	0.00360082	BP response to auxin	Gohir.D06G000900.1, Gohir.D07G016800.1, Gohir.D05G258800.1, Gohir.A03G202500.1, Gohir.D06G202000.1, Gohir.D08G157000.1, Gohir.A01G096800.2, Gohir.A08G232500.1, Gohir.A05G257400.1, Gohir.D04G165201.1, Gohir.A03G202600.1, Gohir.A12G101100.1, Gohir.D13G094500.1, Gohir.A06G005100.1, Gohir.A11G079600.1, Gohir.D12G104000.1, Gohir.D12G031800.1, Gohir.D13G090400.1, Gohir.A08G034800.1, Gohir.A13G086900.1,…
GO:0005576	1.00473e-05	0.999996	33	176	extracellular region	CC	0.000980272	CC extracellular region	Gohir.D08G095500.1, Gohir.D12G095200.1, Gohir.A09G099501.1, Gohir.A08G163500.1, Gohir.A08G163500.1, Gohir.D11G111100.1, Gohir.A07G098800.1, Gohir.D08G213900.1, Gohir.D05G186900.1, Gohir.A10G179500.1, Gohir.D12G142300.1, Gohir.D12G142300.1, Gohir.D03G030200.1, Gohir.D13G076200.1, Gohir.A08G086400.1, Gohir.D02G019700.1, Gohir.A05G278300.1, Gohir.A08G164800.1, Gohir.A08G164800.1, Gohir.D08G183200.1,…
GO:0006952	0.000506635	0.999773	29	190	defense response	BP	0.0210535	BP defense response	Gohir.D10G177000.1, Gohir.A10G169466.1, Gohir.D05G077200.1, Gohir.D02G057500.2, Gohir.A10G207100.1, Gohir.D10G175700.1, Gohir.A10G169900.1, Gohir.D10G176400.1, Gohir.D02G066000.1, Gohir.A02G060600.1, Gohir.D10G177100.1, Gohir.D02G057100.1, Gohir.A02G051700.1, Gohir.A10G169550.1, Gohir.D10G176000.1, Gohir.A02G051800.1, Gohir.A04G103900.1, Gohir.A10G169600.1, Gohir.A05G074401.1, Gohir.A02G052100.1,…
GO:0051287	0.0101759	0.994431	28	181	NAD binding	MF	0.189922	MF NAD binding	Gohir.D09G200200.1, Gohir.A12G022400.1, Gohir.A12G022400.1, Gohir.A11G082400.2, Gohir.D02G129000.1, Gohir.D03G156500.1, Gohir.D03G156500.1, Gohir.A06G091800.1, Gohir.A10G069600.1, Gohir.A05G131500.1, Gohir.A05G131500.1, Gohir.A01G169100.1, Gohir.A01G169100.1, Gohir.D08G232000.1, Gohir.A07G008400.1, Gohir.D05G131000.1, Gohir.D05G131000.1, Gohir.D12G152000.1, Gohir.D01G160100.1, Gohir.D01G160100.1,…
GO:0006520	4.31346e-06	0.999999	26	99	cellular amino acid metabolic process	BP	0.00048397	BP cellular amino acid metabolic process	Gohir.D07G027100.1, Gohir.D02G178100.1, Gohir.D07G159400.1, Gohir.D07G038800.1, Gohir.D02G178200.2, Gohir.A03G155100.1, Gohir.A07G153200.1, Gohir.D13G057700.1, Gohir.D11G314300.2, Gohir.A05G032400.1, Gohir.A10G149066.1, Gohir.D09G139200.1, Gohir.A13G147200.1, Gohir.D04G151700.1, Gohir.D13G066700.4, Gohir.A13G167800.1, Gohir.D07G015900.3, Gohir.D10G117701.1, Gohir.A01G188200.1, Gohir.D13G173200.1,…
GO:0030599	0.0225952	0.987051	26	173	pectinesterase activity	MF	0.347285	MF pectinesterase activity	Gohir.A03G195200.1, Gohir.D06G066300.1, Gohir.D06G081600.1, Gohir.A05G037100.1, Gohir.A11G014800.1, Gohir.D12G250800.1, Gohir.A12G129000.1, Gohir.D05G144000.1, Gohir.D12G219600.1, Gohir.A06G067700.1, Gohir.A05G141600.1, Gohir.D02G142600.1, Gohir.A07G008900.1, Gohir.A07G125900.2, Gohir.A05G141700.1, Gohir.D11G014900.2, Gohir.A12G217100.1, Gohir.D05G143900.1, Gohir.A06G084500.1, Gohir.A03G119200.1,…
GO:0042545	0.0225952	0.987051	26	173	cell wall modification	BP	0.347285	BP cell wall modification	Gohir.A03G195200.1, Gohir.D06G066300.1, Gohir.D06G081600.1, Gohir.A05G037100.1, Gohir.A11G014800.1, Gohir.D12G250800.1, Gohir.A12G129000.1, Gohir.D05G144000.1, Gohir.D12G219600.1, Gohir.A06G067700.1, Gohir.A05G141600.1, Gohir.D02G142600.1, Gohir.A07G008900.1, Gohir.A07G125900.2, Gohir.A05G141700.1, Gohir.D11G014900.2, Gohir.A12G217100.1, Gohir.D05G143900.1, Gohir.A06G084500.1, Gohir.A03G119200.1,…
GO:0051537	1.61272e-09	1	25	70	2 iron, 2 sulfur cluster binding	MF	3.01578e-07	MF 2 iron, 2 sulfur cluster binding	Gohir.D13G034500.2, Gohir.D13G034500.2, Gohir.A08G011100.1, Gohir.A07G225100.1, Gohir.D08G021500.1, Gohir.D02G214000.1, Gohir.D02G214000.1, Gohir.A03G161000.1, Gohir.A03G161000.1, Gohir.A03G193000.1, Gohir.A03G193000.1, Gohir.D04G006800.1, Gohir.D04G006800.1, Gohir.D04G006800.1, Gohir.D05G254800.1, Gohir.D02G213900.1, Gohir.D02G213900.1, Gohir.A13G222600.1, Gohir.A13G222600.1, Gohir.A03G160900.1,…
GO:0009607	2.31579e-07	1	24	103	response to biotic stimulus	BP	2.88702e-05	BP response to biotic stimulus	Gohir.D10G177000.1, Gohir.A10G169466.1, Gohir.D02G057500.2, Gohir.D10G175700.1, Gohir.A10G169900.1, Gohir.D10G176400.1, Gohir.D10G177100.1, Gohir.D02G057100.1, Gohir.A02G051700.1, Gohir.A10G169550.1, Gohir.D10G176000.1, Gohir.A02G051800.1, Gohir.A04G103900.1, Gohir.A10G169600.1, Gohir.A02G052100.1, Gohir.D10G175900.1, Gohir.D02G056600.1, Gohir.D04G143600.1, Gohir.A01G065800.1, Gohir.A01G150800.1,…
GO:0048544	0.0280022	0.984271	23	145	recognition of pollen	BP	0.405399	BP recognition of pollen	Gohir.D01G057600.2, Gohir.D01G026300.2, Gohir.D12G111400.1, Gohir.D02G185200.2, Gohir.A03G162100.1, Gohir.A05G166900.1, Gohir.A09G153132.1, Gohir.A12G108200.1, Gohir.D01G025700.2, Gohir.D01G026060.1, Gohir.D01G058000.1, Gohir.A01G037800.1, Gohir.D02G185400.2, Gohir.A03G162300.1, Gohir.A01G071200.2, Gohir.D01G026100.1, Gohir.D01G058100.4, Gohir.D06G008600.2, Gohir.D02G184800.1, Gohir.A01G038200.2,…
GO:0008146	1.78879e-05	0.999995	22	92	sulfotransferase activity	MF	0.00138415	MF sulfotransferase activity	Gohir.D05G373000.1, Gohir.A04G012300.1, Gohir.A12G184000.1, Gohir.D11G240900.1, Gohir.D04G109200.1, Gohir.D03G041500.1, Gohir.A02G130400.1, Gohir.D01G202400.1, Gohir.D05G284600.2, Gohir.A07G059000.1, Gohir.D03G041600.1, Gohir.A01G213800.1, Gohir.D05G284700.1, Gohir.A07G059100.1, Gohir.D03G041200.1, Gohir.D05G374100.1, Gohir.D03G041700.1, Gohir.A04G012442.1, Gohir.A02G130600.2, Gohir.D11G243300.1,…
GO:0005504	1.85142e-15	1	21	37	fatty acid binding	MF	8.30918e-13	MF fatty acid binding	Gohir.A10G226000.1, Gohir.D01G071850.1, Gohir.D10G238316.1, Gohir.D10G238300.1, Gohir.D13G046900.1, Gohir.A10G139300.1, Gohir.A10G227700.1, Gohir.A10G225966.1, Gohir.A10G225900.1, Gohir.A04G010600.1, Gohir.A13G048500.1, Gohir.D10G241800.1, Gohir.A10G227800.1, Gohir.A10G139400.1, Gohir.A07G159300.1, Gohir.D05G377400.1, Gohir.D10G127500.1, Gohir.D11G148700.1, Gohir.A01G085500.1, Gohir.A11G142400.1,…
GO:0009627	1.85142e-15	1	21	37	systemic acquired resistance	BP	8.30918e-13	BP systemic acquired resistance	Gohir.A10G226000.1, Gohir.D01G071850.1, Gohir.D10G238316.1, Gohir.D10G238300.1, Gohir.D13G046900.1, Gohir.A10G139300.1, Gohir.A10G227700.1, Gohir.A10G225966.1, Gohir.A10G225900.1, Gohir.A04G010600.1, Gohir.A13G048500.1, Gohir.D10G241800.1, Gohir.A10G227800.1, Gohir.A10G139400.1, Gohir.A07G159300.1, Gohir.D05G377400.1, Gohir.D10G127500.1, Gohir.D11G148700.1, Gohir.A01G085500.1, Gohir.A11G142400.1,…
GO:0050662	0.00295506	0.998716	21	111	coenzyme binding	MF	0.0828894	MF coenzyme binding	Gohir.D05G211000.2, Gohir.D01G119500.1, Gohir.D01G119500.1, Gohir.D01G119500.1, Gohir.A01G198000.1, Gohir.D08G220000.1, Gohir.D05G043400.1, Gohir.A03G199400.1, Gohir.A05G201600.2, Gohir.A07G123550.1, Gohir.A05G084000.1, Gohir.A11G080200.1, Gohir.D08G232000.1, Gohir.A08G202950.1, Gohir.A07G138900.1, Gohir.A05G007600.1, Gohir.A05G119800.1, Gohir.D05G120800.1, Gohir.A10G127600.1, Gohir.A03G184300.1,…
GO:0030244	0.00123985	0.999517	20	94	cellulose biosynthetic process	BP	0.0434721	BP cellulose biosynthetic process	Gohir.A05G008500.1, Gohir.A09G189400.1, Gohir.A05G009200.1, Gohir.A05G244300.1, Gohir.A11G218600.1, Gohir.D12G239200.1, Gohir.D05G009200.1, Gohir.A09G200000.1, Gohir.D09G226000.1, Gohir.D09G184200.1, Gohir.D01G077000.1, Gohir.A09G189501.1, Gohir.A08G144300.1, Gohir.D09G184300.1, Gohir.A12G238132.1, Gohir.A12G238066.1, Gohir.D05G009900.1, Gohir.D11G226600.1, Gohir.A01G092600.1, Gohir.A11G025550.1
GO:0051536	0.023097	0.987813	20	139	iron-sulfur cluster binding	MF	0.3502	MF iron-sulfur cluster binding	Gohir.D13G034500.2, Gohir.A07G225100.1, Gohir.A07G225100.1, Gohir.A10G120700.1, Gohir.D02G214000.1, Gohir.D08G247300.1, Gohir.A03G193000.1, Gohir.A05G003800.3, Gohir.D10G145600.1, Gohir.D02G213900.1, Gohir.A13G222600.1, Gohir.A03G192900.1, Gohir.D05G083800.2, Gohir.D07G232300.1, Gohir.D07G232300.1, Gohir.D09G218400.1, Gohir.A05G035600.1, Gohir.A07G196200.1, Gohir.D05G004200.1, Gohir.D03G117800.6,…
GO:0016760	0.00202496	0.999197	19	91	cellulose synthase (UDP-forming) activity	MF	0.0614709	MF cellulose synthase (UDP-forming) activity	Gohir.A05G008500.1, Gohir.A09G189400.1, Gohir.A05G009200.1, Gohir.A05G244300.1, Gohir.A11G218600.1, Gohir.D12G239200.1, Gohir.D05G009200.1, Gohir.D09G226000.1, Gohir.D09G184200.1, Gohir.D01G077000.1, Gohir.A09G189501.1, Gohir.A08G144300.1, Gohir.D09G184300.1, Gohir.A12G238132.1, Gohir.A12G238066.1, Gohir.D05G009900.1, Gohir.D11G226600.1, Gohir.A01G092600.1, Gohir.A11G025550.1
GO:0009523	0.00251319	0.998946	19	163	photosystem II	CC	0.0732416	CC photosystem II	Gohir.A04G050200.1, Gohir.A08G188400.1, Gohir.D13G197200.1, Gohir.D08G206800.1, Gohir.D05G300200.1, Gohir.D11G133100.1, Gohir.D11G276600.1, Gohir.D05G170500.1, Gohir.A11G248900.1, Gohir.D07G158900.1, Gohir.A01G188600.1, Gohir.A11G266300.1, Gohir.A05G300500.1, Gohir.D07G013766.1, Gohir.A07G152700.1, Gohir.D04G034900.2, Gohir.A13G191700.1, Gohir.D01G024400.1, Gohir.D05G330700.1
GO:0004185	0.0114238	0.994563	19	110	serine-type carboxypeptidase activity	MF	0.194204	MF serine-type carboxypeptidase activity	Gohir.A11G142900.1, Gohir.A03G120900.1, Gohir.D07G031200.1, Gohir.A09G066500.1, Gohir.D09G087300.1, Gohir.D04G088200.1, Gohir.A03G098500.2, Gohir.D09G066100.1, Gohir.A09G087500.1, Gohir.A09G115600.1, Gohir.D08G162900.1, Gohir.D05G214300.1, Gohir.A03G029900.1, Gohir.D04G147800.1, Gohir.D03G138600.1, Gohir.D09G112501.1, Gohir.D02G144200.1, Gohir.A08G200400.1, Gohir.A04G108000.1
GO:0009664	0.000284034	0.999909	18	78	plant-type cell wall organization	BP	0.0132786	BP plant-type cell wall organization	Gohir.D11G111100.1, Gohir.A07G098800.1, Gohir.D05G186900.1, Gohir.A10G179500.1, Gohir.D13G076200.1, Gohir.A05G278300.1, Gohir.D02G014550.1, Gohir.D05G280000.1, Gohir.A02G065100.1, Gohir.D09G203900.1, Gohir.A12G012600.1, Gohir.A02G013500.1, Gohir.A11G106200.1, Gohir.D10G186200.1, Gohir.A13G076500.1, Gohir.D12G180900.1, Gohir.A06G001600.1, Gohir.A05G184100.1
GO:0016791	0.0473177	0.973893	18	122	phosphatase activity	MF	0.594458	MF phosphatase activity	Gohir.D05G136100.1, Gohir.D02G071200.1, Gohir.A02G065400.1, Gohir.D07G195100.1, Gohir.A07G084200.1, Gohir.A05G393800.1, Gohir.A05G026900.1, Gohir.D10G062900.2, Gohir.D07G175100.1, Gohir.A07G168600.1, Gohir.A04G125800.1, Gohir.D10G063200.1, Gohir.A07G187600.1, Gohir.A05G134200.1, Gohir.A10G236800.1, Gohir.D10G248600.1, Gohir.D04G021000.1, Gohir.D07G090300.1
GO:0009654	2.23076e-05	0.999996	14	46	photosystem II oxygen evolving complex	CC	0.00166861	CC photosystem II oxygen evolving complex	Gohir.A04G050200.1, Gohir.D05G300200.1, Gohir.D11G276600.1, Gohir.D11G194600.1, Gohir.D05G170500.1, Gohir.D07G158900.1, Gohir.A01G188600.1, Gohir.A11G266300.1, Gohir.A05G300500.1, Gohir.A07G152700.1, Gohir.D04G034900.2, Gohir.A11G188100.1, Gohir.D01G024400.1, Gohir.D05G330700.1
GO:0010181	0.00471872	0.998274	14	67	FMN binding	MF	0.11636	MF FMN binding	Gohir.A10G017900.1, Gohir.A10G017900.1, Gohir.D02G202971.1, Gohir.D02G202971.1, Gohir.D03G016500.1, Gohir.D03G016500.1, Gohir.D05G363500.1, Gohir.D05G363500.1, Gohir.A10G056200.2, Gohir.A05G147600.3, Gohir.D12G152000.1, Gohir.D12G152000.1, Gohir.D03G116900.4, Gohir.D03G116900.4, Gohir.A03G179900.3, Gohir.A03G179900.3, Gohir.A04G024000.1, Gohir.A04G024000.1, Gohir.D05G150100.2, Gohir.D10G058100.1,…
GO:0009725	0.0190015	0.991671	14	74	response to hormone	BP	0.30898	BP response to hormone	Gohir.D05G190900.1, Gohir.D08G147701.1, Gohir.D10G045300.1, Gohir.A05G158300.1, Gohir.D05G160900.2, Gohir.D05G103600.1, Gohir.D05G077400.2, Gohir.A05G187900.1, Gohir.A05G103800.1, Gohir.D11G025200.1, Gohir.D09G039851.1, Gohir.D06G041200.1, Gohir.D07G016200.1, Gohir.A06G127202.1
GO:0009073	1.24781e-05	0.999998	13	34	aromatic amino acid family biosynthetic process	BP	0.00112004	BP aromatic amino acid family biosynthetic process	Gohir.D05G061600.1, Gohir.D11G075200.1, Gohir.A11G071200.1, Gohir.A05G297100.1, Gohir.D05G297000.1, Gohir.D12G058900.1, Gohir.A12G101500.1, Gohir.A05G224800.1, Gohir.D12G104500.1, Gohir.A07G146300.1, Gohir.D11G074800.1, Gohir.A12G058900.1, Gohir.A11G070900.1
GO:0008061	0.00143111	0.999599	12	48	chitin binding	MF	0.0479316	MF chitin binding	Gohir.D10G124200.1, Gohir.A07G025400.1, Gohir.A12G111500.1, Gohir.D07G029100.1, Gohir.D10G124400.1, Gohir.D09G206400.1, Gohir.A10G142400.1, Gohir.D11G262600.1, Gohir.A07G025360.1, Gohir.A11G252700.1, Gohir.D01G164000.2, Gohir.A01G172800.1
GO:0006857	0.00267633	0.999192	12	47	oligopeptide transport	BP	0.0769961	BP oligopeptide transport	Gohir.D03G161700.1, Gohir.D13G123200.1, Gohir.D03G161800.1, Gohir.A05G090400.1, Gohir.D05G100600.1, Gohir.A03G009200.1, Gohir.D03G118300.1, Gohir.A09G020500.1, Gohir.D09G020050.1, Gohir.A03G048800.2, Gohir.D13G189800.1, Gohir.A13G183500.1
GO:0005543	0.00383574	0.998774	12	51	phospholipid binding	MF	0.0978114	MF phospholipid binding	Gohir.A07G028400.2, Gohir.D06G033700.1, Gohir.A05G053600.1, Gohir.D07G032500.3, Gohir.A07G037000.2, Gohir.A06G032800.1, Gohir.A04G142100.2, Gohir.D06G052400.1, Gohir.D05G250400.1, Gohir.A05G222700.1, Gohir.D10G100800.1, Gohir.A11G051000.1
GO:0006631	0.00577922	0.998042	12	53	fatty acid metabolic process	BP	0.130996	BP fatty acid metabolic process	Gohir.D05G327800.1, Gohir.D11G223300.1, Gohir.D06G062700.2, Gohir.D07G165678.1, Gohir.A10G085600.1, Gohir.D01G048800.1, Gohir.D01G048800.1, Gohir.A11G200400.1, Gohir.D12G092450.1, Gohir.D10G102900.1, Gohir.A01G062201.1, Gohir.A01G062201.1, Gohir.A05G327800.1, Gohir.A02G089100.1
GO:0008483	0.00755678	0.997341	12	54	transaminase activity	MF	0.163052	MF transaminase activity	Gohir.D02G005800.1, Gohir.D07G027100.1, Gohir.D02G178100.1, Gohir.D02G178200.2, Gohir.A03G155100.1, Gohir.A10G149066.1, Gohir.A13G147200.1, Gohir.D13G066700.4, Gohir.D10G117701.1, Gohir.A02G005300.1, Gohir.A07G023400.1, Gohir.D07G027000.1
GO:0000155	0.0362372	0.983769	12	65	phosphorelay sensor kinase activity	MF	0.492826	MF phosphorelay sensor kinase activity	Gohir.A13G172900.2, Gohir.A05G099800.1, Gohir.D11G156200.1, Gohir.A03G112400.2, Gohir.D03G132400.1, Gohir.A12G149200.1, Gohir.A07G166800.3, Gohir.D02G043500.1, Gohir.D02G043500.1, Gohir.D11G271900.1, Gohir.A01G041500.2, Gohir.A03G098200.1, Gohir.A05G063000.1
GO:0003993	0.0478599	0.977383	12	76	acid phosphatase activity	MF	0.594458	MF acid phosphatase activity	Gohir.D13G029700.1, Gohir.D13G029700.1, Gohir.A06G006600.1, Gohir.A06G006600.1, Gohir.A13G031700.1, Gohir.A13G031700.1, Gohir.A13G082700.1, Gohir.A13G082700.1, Gohir.D10G113600.2, Gohir.A02G002200.2, Gohir.A07G150800.2, Gohir.A09G205400.1, Gohir.A09G205400.1, Gohir.D13G143500.1, Gohir.D13G143500.1, Gohir.D07G157400.1, Gohir.A12G161200.1, Gohir.A12G161200.1, Gohir.D01G134700.1
GO:0009522	0.031403	0.986481	11	89	photosystem I	CC	0.440427	CC photosystem I	Gohir.D02G038100.1, Gohir.A07G202600.2, Gohir.D08G056700.1, Gohir.D06G146300.1, Gohir.A05G131700.1, Gohir.A05G143600.1, Gohir.1Z049558.1, Gohir.D05G131200.1, Gohir.A02G031301.1, Gohir.D13G132000.1, Gohir.D13G132000.1, Gohir.D05G145900.1
GO:0009538	6.16379e-06	0.999999	10	23	photosystem I reaction center	CC	0.000658645	CC photosystem I reaction center	Gohir.D02G038100.1, Gohir.A07G202600.2, Gohir.D08G056700.1, Gohir.D06G146300.1, Gohir.A05G131700.1, Gohir.A05G143600.1, Gohir.1Z049558.1, Gohir.D05G131200.1, Gohir.A02G031301.1, Gohir.D05G145900.1
GO:0004568	0.00205451	0.999479	10	39	chitinase activity	MF	0.0614709	MF chitinase activity	Gohir.D10G004700.1, Gohir.D10G004700.1, Gohir.D10G124200.1, Gohir.D10G124200.1, Gohir.D09G064100.1, Gohir.D09G064100.1, Gohir.D06G050800.1, Gohir.D06G050800.1, Gohir.D10G124400.1, Gohir.D10G124400.1, Gohir.D09G206400.1, Gohir.D09G206400.1, Gohir.A10G142400.1, Gohir.A10G142400.1, Gohir.A06G051900.1, Gohir.A06G051900.1, Gohir.D01G164000.2, Gohir.D01G164000.2, Gohir.A01G172800.1, Gohir.A01G172800.1
GO:0006032	0.00205451	0.999479	10	39	chitin catabolic process	BP	0.0614709	BP chitin catabolic process	Gohir.D10G004700.1, Gohir.D10G124200.1, Gohir.D09G064100.1, Gohir.D06G050800.1, Gohir.D10G124400.1, Gohir.D09G206400.1, Gohir.A10G142400.1, Gohir.A06G051900.1, Gohir.D01G164000.2, Gohir.A01G172800.1
GO:0016998	0.00205451	0.999479	10	39	cell wall macromolecule catabolic process	BP	0.0614709	BP cell wall macromolecule catabolic process	Gohir.D10G004700.1, Gohir.D10G124200.1, Gohir.D09G064100.1, Gohir.D06G050800.1, Gohir.D10G124400.1, Gohir.D09G206400.1, Gohir.A10G142400.1, Gohir.A06G051900.1, Gohir.D01G164000.2, Gohir.A01G172800.1
GO:0000272	0.00921707	0.99728	9	36	polysaccharide catabolic process	BP	0.181993	BP polysaccharide catabolic process	Gohir.D10G161401.1, Gohir.D10G166400.3, Gohir.A03G015100.1, Gohir.D10G161266.1, Gohir.D10G161200.2, Gohir.A10G101605.1, Gohir.D10G161700.2, Gohir.D10G161101.1, Gohir.A11G029500.1
GO:0016161	0.00921707	0.99728	9	36	beta-amylase activity	MF	0.181993	MF beta-amylase activity	Gohir.D10G161401.1, Gohir.D10G166400.3, Gohir.A03G015100.1, Gohir.D10G161266.1, Gohir.D10G161200.2, Gohir.A10G101605.1, Gohir.D10G161700.2, Gohir.D10G161101.1, Gohir.A11G029500.1
GO:0016841	1.14901e-05	0.999999	8	13	ammonia-lyase activity	MF	0.00107433	MF ammonia-lyase activity	Gohir.D09G144700.1, Gohir.D09G144700.1, Gohir.A04G073300.1, Gohir.A04G073300.1, Gohir.D04G112140.1, Gohir.D04G112140.1, Gohir.D10G212700.1, Gohir.D10G212700.1, Gohir.A10G204700.1, Gohir.A10G204700.1, Gohir.D11G343500.1, Gohir.D11G343500.1, Gohir.A09G148900.1, Gohir.A09G148900.1, Gohir.A11G324340.1, Gohir.A11G324340.1
GO:0003955	3.2637e-05	0.999997	8	16	NAD(P)H dehydrogenase (quinone) activity	MF	0.00213911	MF NAD(P)H dehydrogenase (quinone) activity	Gohir.A10G017900.1, Gohir.D02G202971.1, Gohir.D03G016500.1, Gohir.D05G363500.1, Gohir.D03G116900.4, Gohir.A03G179900.3, Gohir.A04G024000.1, Gohir.A02G163700.1
GO:0006559	4.69976e-05	0.999996	8	15	L-phenylalanine catabolic process	BP	0.00285034	BP L-phenylalanine catabolic process	Gohir.D09G144700.1, Gohir.A04G073300.1, Gohir.D04G112140.1, Gohir.D10G212700.1, Gohir.A10G204700.1, Gohir.D11G343500.1, Gohir.A09G148900.1, Gohir.A11G324340.1
GO:0047617	0.00371399	0.99914	8	33	acyl-CoA hydrolase activity	MF	0.0969092	MF acyl-CoA hydrolase activity	Gohir.A11G088400.2, Gohir.A11G058700.1, Gohir.D10G069533.1, Gohir.D08G151100.1, Gohir.D11G090600.1, Gohir.D09G081800.1, Gohir.A11G086400.1, Gohir.D11G092700.2
GO:0022900	0.00812823	0.997797	8	39	electron transport chain	BP	0.172073	BP electron transport chain	Gohir.D12G065000.1, Gohir.D13G034500.2, Gohir.D02G214000.1, Gohir.A03G193000.1, Gohir.D02G213900.1, Gohir.A13G222600.1, Gohir.A03G192900.1, Gohir.D09G218400.1
GO:0016857	0.0191923	0.993997	8	35	racemase and epimerase activity, acting on carbohydrates and derivatives	MF	0.309839	MF racemase and epimerase activity, acting on carbohydrates and derivatives	Gohir.A05G394400.1, Gohir.A11G080200.1, Gohir.D12G228500.2, Gohir.A09G190200.2, Gohir.A01G211400.1, Gohir.A07G226900.1, Gohir.A12G226000.1, Gohir.A10G127600.1
GO:0045893	0.0233584	0.992365	8	37	positive regulation of transcription, DNA-templated	BP	0.351787	BP positive regulation of transcription, DNA-templated	Gohir.D01G196300.2, Gohir.D05G048000.1, Gohir.A05G046300.1, Gohir.A05G403900.1, Gohir.A03G198600.1, Gohir.A05G296800.1, Gohir.D04G011900.1, Gohir.D05G296700.2
GO:0004602	0.00030335	0.999966	7	16	glutathione peroxidase activity	MF	0.0138922	MF glutathione peroxidase activity	Gohir.D12G230200.1, Gohir.D08G083200.1, Gohir.A08G074000.4, Gohir.A12G227900.1, Gohir.D12G230400.2, Gohir.D07G037000.1, Gohir.A12G227700.1
GO:0004478	0.000383486	0.999957	7	15	methionine adenosyltransferase activity	MF	0.0168734	MF methionine adenosyltransferase activity	Gohir.A11G106400.1, Gohir.A11G106400.1, Gohir.A12G121100.1, Gohir.A12G121100.1, Gohir.D12G124900.1, Gohir.D12G124900.1, Gohir.D11G111300.1, Gohir.D11G111300.1, Gohir.D11G343000.1, Gohir.D11G343000.1, Gohir.D08G142400.1, Gohir.D08G142400.1, Gohir.D07G135100.1, Gohir.D07G135100.1
GO:0006556	0.000383486	0.999957	7	15	S-adenosylmethionine biosynthetic process	BP	0.0168734	BP S-adenosylmethionine biosynthetic process	Gohir.A11G106400.1, Gohir.A11G106400.1, Gohir.A12G121100.1, Gohir.A12G121100.1, Gohir.D12G124900.1, Gohir.D12G124900.1, Gohir.D11G111300.1, Gohir.D11G111300.1, Gohir.D11G343000.1, Gohir.D11G343000.1, Gohir.D08G142400.1, Gohir.D08G142400.1, Gohir.D07G135100.1, Gohir.D07G135100.1
GO:0042651	0.000434077	0.999941	7	24	thylakoid membrane	CC	0.0187321	CC thylakoid membrane	Gohir.A04G050200.1, Gohir.A03G161000.1, Gohir.A03G160900.1, Gohir.D02G184350.1, Gohir.D02G184300.1, Gohir.D01G024400.1, Gohir.D05G330700.1
GO:0008131	0.000587123	0.999927	7	16	primary amine oxidase activity	MF	0.0227156	MF primary amine oxidase activity	Gohir.A02G031500.1, Gohir.D01G150800.1, Gohir.A12G144700.1, Gohir.D02G038200.1, Gohir.D08G192100.1, Gohir.A08G173400.1, Gohir.D12G149300.1
GO:0009308	0.000587123	0.999927	7	16	amine metabolic process	BP	0.0227156	BP amine metabolic process	Gohir.A02G031500.1, Gohir.D01G150800.1, Gohir.A12G144700.1, Gohir.D02G038200.1, Gohir.D08G192100.1, Gohir.A08G173400.1, Gohir.D12G149300.1
GO:0019953	0.00120766	0.999814	7	20	sexual reproduction	BP	0.0430159	BP sexual reproduction	Gohir.A08G163500.1, Gohir.D12G142300.1, Gohir.A08G164800.1, Gohir.D08G183200.1, Gohir.D08G183300.1, Gohir.A08G163400.2, Gohir.A12G138200.1
GO:0050832	0.00132138	0.999786	7	23	defense response to fungus	BP	0.0456181	BP defense response to fungus	Gohir.A13G169600.1, Gohir.A05G066764.1, Gohir.D11G262600.1, Gohir.D13G175100.1, Gohir.A11G252700.1, Gohir.A13G169800.1, Gohir.D13G175200.1
GO:0016717	0.00350253	0.999336	7	21	oxidoreductase activity, acting on paired donors, with oxidation of a pair of donors resulting in the reduction of molecular oxygen to two molecules of water	MF	0.0924668	MF oxidoreductase activity, acting on paired donors, with oxidation of a pair of donors resulting in the reduction of molecular oxygen to two molecules of water	Gohir.D01G125900.1, Gohir.A01G137630.1, Gohir.D05G124400.1, Gohir.A05G123400.1, Gohir.D11G331500.2, Gohir.D10G249300.1, Gohir.A10G237600.1
GO:0006694	0.0107696	0.997347	7	26	steroid biosynthetic process	BP	0.189922	BP steroid biosynthetic process	Gohir.D04G055400.1, Gohir.A06G080600.1, Gohir.A05G182600.1, Gohir.D05G257100.1, Gohir.D12G236500.1, Gohir.D05G185600.1, Gohir.A05G358700.1
GO:0008083	0.0252867	0.992121	7	43	growth factor activity	MF	0.375784	MF growth factor activity	Gohir.D03G030200.1, Gohir.D12G076500.1, Gohir.A06G051301.1, Gohir.D05G013100.1, Gohir.A05G012100.1, Gohir.D13G086100.1, Gohir.D01G198300.1
GO:0006635	0.0324637	0.989647	7	32	fatty acid beta-oxidation	BP	0.445048	BP fatty acid beta-oxidation	Gohir.D11G223300.1, Gohir.D06G062700.2, Gohir.D07G165678.1, Gohir.A10G085600.1, Gohir.A11G200400.1, Gohir.D12G092450.1, Gohir.D10G102900.1
GO:0048038	0.0399619	0.986458	7	37	quinone binding	MF	0.527498	MF quinone binding	Gohir.A02G031500.1, Gohir.D01G150800.1, Gohir.A12G144700.1, Gohir.D02G038200.1, Gohir.D08G192100.1, Gohir.A08G173400.1, Gohir.D12G149300.1
GO:0019898	0.0455514	0.984073	7	38	extrinsic component of membrane	CC	0.584099	CC extrinsic component of membrane	Gohir.D05G300200.1, Gohir.D11G276600.1, Gohir.D05G170500.1, Gohir.A01G188600.1, Gohir.A11G266300.1, Gohir.A05G300500.1, Gohir.D04G034900.2
GO:0042742	1.29828e-05	1	6	9	defense response to bacterium	BP	0.00112051	BP defense response to bacterium	Gohir.A13G169600.1, Gohir.D11G262600.1, Gohir.D13G175100.1, Gohir.A11G252700.1, Gohir.A13G169800.1, Gohir.D13G175200.1
GO:0009785	3.0743e-05	0.999999	6	8	blue light signaling pathway	BP	0.00209052	BP blue light signaling pathway	Gohir.D05G268400.1, Gohir.A05G226100.1, Gohir.A05G266800.1, Gohir.D05G228900.1, Gohir.D09G231000.1, Gohir.A09G230000.1
GO:0009882	3.0743e-05	0.999999	6	8	blue light photoreceptor activity	MF	0.00209052	MF blue light photoreceptor activity	Gohir.D05G268400.1, Gohir.A05G226100.1, Gohir.A05G266800.1, Gohir.D05G228900.1, Gohir.D09G231000.1, Gohir.A09G230000.1
GO:0010277	0.00179444	0.99977	6	14	chlorophyllide a oxygenase [overall] activity	MF	0.0567144	MF chlorophyllide a oxygenase [overall] activity	Gohir.A08G011100.1, Gohir.D08G021500.1, Gohir.A05G060800.1, Gohir.A07G105000.1, Gohir.A08G011000.1, Gohir.D08G021400.2
GO:0007166	0.00282627	0.999591	6	15	cell surface receptor signaling pathway	BP	0.0802803	BP cell surface receptor signaling pathway	Gohir.D10G211500.1, Gohir.D02G231100.1, Gohir.A05G096300.1, Gohir.A07G097101.1, Gohir.D07G101600.1, Gohir.D05G096500.1
GO:0004869	0.00783031	0.998401	6	25	cysteine-type endopeptidase inhibitor activity	MF	0.167345	MF cysteine-type endopeptidase inhibitor activity	Gohir.A01G231300.1, Gohir.A09G109500.1, Gohir.A06G153800.1, Gohir.A02G016600.1, Gohir.D01G221401.1, Gohir.D06G160600.1
GO:0042753	0.00916867	0.99809	6	23	positive regulation of circadian rhythm	BP	0.181993	BP positive regulation of circadian rhythm	Gohir.D06G074600.1, Gohir.A10G236200.1, Gohir.A13G191500.1, Gohir.A05G140500.2, Gohir.A06G075600.1, Gohir.A06G163700.1
GO:0004372	0.0171449	0.995963	6	21	glycine hydroxymethyltransferase activity	MF	0.282891	MF glycine hydroxymethyltransferase activity	Gohir.A10G127300.1, Gohir.D05G233500.1, Gohir.D10G138600.1, Gohir.A09G206500.1, Gohir.A02G078902.1, Gohir.D02G086400.1
GO:0019264	0.0171449	0.995963	6	21	glycine biosynthetic process from serine	BP	0.282891	BP glycine biosynthetic process from serine	Gohir.A10G127300.1, Gohir.D05G233500.1, Gohir.D10G138600.1, Gohir.A09G206500.1, Gohir.A02G078902.1, Gohir.D02G086400.1
GO:0035999	0.0171449	0.995963	6	21	tetrahydrofolate interconversion	BP	0.282891	BP tetrahydrofolate interconversion	Gohir.A10G127300.1, Gohir.D05G233500.1, Gohir.D10G138600.1, Gohir.A09G206500.1, Gohir.A02G078902.1, Gohir.D02G086400.1
GO:0050664	0.0225278	0.9943	6	22	oxidoreductase activity, acting on NAD(P)H, oxygen as acceptor	MF	0.347285	MF oxidoreductase activity, acting on NAD(P)H, oxygen as acceptor	Gohir.A11G267300.1, Gohir.D11G277300.1, Gohir.D03G079000.1, Gohir.D07G016600.1, Gohir.A12G233100.1, Gohir.D12G234200.1
GO:0005452	0.0325258	0.99089	6	24	inorganic anion exchanger activity	MF	0.445048	MF inorganic anion exchanger activity	Gohir.A02G086200.1, Gohir.A12G122300.1, Gohir.A09G241800.1, Gohir.A11G001000.1, Gohir.D12G126000.1, Gohir.D09G242500.1
GO:0006820	0.0325258	0.99089	6	24	anion transport	BP	0.445048	BP anion transport	Gohir.A02G086200.1, Gohir.A02G086200.1, Gohir.A12G122300.1, Gohir.A12G122300.1, Gohir.A09G241800.1, Gohir.A09G241800.1, Gohir.A11G001000.1, Gohir.A11G001000.1, Gohir.D12G126000.1, Gohir.D12G126000.1, Gohir.D09G242500.1, Gohir.D09G242500.1
GO:0005199	0.000467522	0.999974	5	8	structural constituent of cell wall	MF	0.0197947	MF structural constituent of cell wall	Gohir.A13G146400.1, Gohir.D02G014550.1, Gohir.A02G065100.1, Gohir.D09G203900.1, Gohir.A02G013500.1
GO:0046417	0.000864298	0.999938	5	9	chorismate metabolic process	BP	0.0323247	BP chorismate metabolic process	Gohir.D05G061600.1, Gohir.D11G075200.1, Gohir.A11G071200.1, Gohir.D11G074800.1, Gohir.A11G070900.1
GO:0006826	0.0010941	0.999911	5	10	iron ion transport	BP	0.0395995	BP iron ion transport	Gohir.A10G238500.1, Gohir.A09G167200.1, Gohir.D10G250400.2, Gohir.D09G163100.1, Gohir.D05G303500.1
GO:0006879	0.0010941	0.999911	5	10	cellular iron ion homeostasis	BP	0.0395995	BP cellular iron ion homeostasis	Gohir.A10G238500.1, Gohir.A10G238500.1, Gohir.A09G167200.1, Gohir.A09G167200.1, Gohir.D10G250400.2, Gohir.D10G250400.2, Gohir.D09G163100.1, Gohir.D09G163100.1, Gohir.D05G303500.1, Gohir.D05G303500.1
GO:0004106	0.00162632	0.999854	5	10	chorismate mutase activity	MF	0.0531304	MF chorismate mutase activity	Gohir.D05G061600.1, Gohir.D11G075200.1, Gohir.A11G071200.1, Gohir.D11G074800.1, Gohir.A11G070900.1
GO:0008199	0.00315419	0.999635	5	12	ferric iron binding	MF	0.0873828	MF ferric iron binding	Gohir.A10G238500.1, Gohir.A10G238500.1, Gohir.A09G167200.1, Gohir.A09G167200.1, Gohir.D10G250400.2, Gohir.D10G250400.2, Gohir.D09G163100.1, Gohir.D09G163100.1, Gohir.D05G303500.1, Gohir.D05G303500.1
GO:0005615	0.00421943	0.999459	5	13	extracellular space	CC	0.105623	CC extracellular space	Gohir.D02G082800.1, Gohir.A02G075700.1, Gohir.A11G151700.1, Gohir.D05G202500.1, Gohir.A05G199500.1
GO:0004664	0.00513465	0.999331	5	12	prephenate dehydratase activity	MF	0.123894	MF prephenate dehydratase activity	Gohir.D09G093100.1, Gohir.A09G093300.1, Gohir.D08G013900.1, Gohir.A08G003600.1, Gohir.D06G154600.2
GO:0009094	0.00513465	0.999331	5	12	L-phenylalanine biosynthetic process	BP	0.123894	BP L-phenylalanine biosynthetic process	Gohir.D09G093100.1, Gohir.A09G093300.1, Gohir.D08G013900.1, Gohir.A08G003600.1, Gohir.D06G154600.2
GO:0003857	0.0108899	0.99815	5	15	3-hydroxyacyl-CoA dehydrogenase activity	MF	0.189922	MF 3-hydroxyacyl-CoA dehydrogenase activity	Gohir.D06G062700.2, Gohir.D07G165678.1, Gohir.D01G048800.1, Gohir.D01G048800.1, Gohir.D12G092450.1, Gohir.A01G062201.1, Gohir.A01G062201.1
GO:0004559	0.0110873	0.998146	5	14	alpha-mannosidase activity	MF	0.189922	MF alpha-mannosidase activity	Gohir.A02G171700.1, Gohir.D03G008400.1, Gohir.A03G056250.1, Gohir.D03G110200.1, Gohir.D09G000500.1
GO:0006013	0.0110873	0.998146	5	14	mannose metabolic process	BP	0.189922	BP mannose metabolic process	Gohir.A02G171700.1, Gohir.D03G008400.1, Gohir.A03G056250.1, Gohir.D03G110200.1, Gohir.D09G000500.1
GO:0004143	0.0204314	0.995845	5	16	diacylglycerol kinase activity	MF	0.325164	MF diacylglycerol kinase activity	Gohir.A05G006300.1, Gohir.A05G006300.1, Gohir.A05G006300.1, Gohir.D13G215400.1, Gohir.D13G215400.1, Gohir.D13G215400.1, Gohir.D01G056850.1, Gohir.D01G056850.1, Gohir.A01G069500.3, Gohir.A01G069500.3, Gohir.D08G255400.1, Gohir.D08G255400.1, Gohir.D08G255400.1
GO:0007205	0.0204314	0.995845	5	16	protein kinase C-activating G protein-coupled receptor signaling pathway	BP	0.325164	BP protein kinase C-activating G protein-coupled receptor signaling pathway	Gohir.A05G006300.1, Gohir.D13G215400.1, Gohir.D01G056850.1, Gohir.A01G069500.3, Gohir.D08G255400.1
GO:0004046	0.0216098	0.995476	5	17	aminoacylase activity	MF	0.339487	MF aminoacylase activity	Gohir.D13G057700.1, Gohir.D04G151700.1, Gohir.D07G015900.3, Gohir.A01G188200.1, Gohir.A04G111400.1
GO:0003978	0.0382181	0.990458	5	19	UDP-glucose 4-epimerase activity	MF	0.513541	MF UDP-glucose 4-epimerase activity	Gohir.A05G394400.1, Gohir.D12G228500.2, Gohir.A09G190200.2, Gohir.A01G211400.1, Gohir.A12G226000.1
GO:0009496	7.13231e-05	1	4	4	plastoquinol--plastocyanin reductase activity	MF	0.00381069	MF plastoquinol--plastocyanin reductase activity	Gohir.A03G161000.1, Gohir.A03G161000.1, Gohir.A03G160900.1, Gohir.A03G160900.1, Gohir.D02G184350.1, Gohir.D02G184350.1, Gohir.D02G184300.1, Gohir.D02G184300.1
GO:0004489	0.000120158	1	4	4	methylenetetrahydrofolate reductase (NAD(P)H) activity	MF	0.00588801	MF methylenetetrahydrofolate reductase (NAD(P)H) activity	Gohir.A09G206300.1, Gohir.D09G199900.1, Gohir.D10G138300.2, Gohir.A10G127700.1
GO:0006555	0.000120158	1	4	4	methionine metabolic process	BP	0.00588801	BP methionine metabolic process	Gohir.A09G206300.1, Gohir.D09G199900.1, Gohir.D10G138300.2, Gohir.A10G127700.1
GO:0046373	0.000120699	1	4	4	L-arabinose metabolic process	BP	0.00588801	BP L-arabinose metabolic process	Gohir.A01G192500.1, Gohir.D07G129800.1, Gohir.D01G177400.4, Gohir.A07G125600.1
GO:0046556	0.000120699	1	4	4	alpha-L-arabinofuranosidase activity	MF	0.00588801	MF alpha-L-arabinofuranosidase activity	Gohir.A01G192500.1, Gohir.D07G129800.1, Gohir.D01G177400.4, Gohir.A07G125600.1
GO:0004126	0.000552234	0.999981	4	6	cytidine deaminase activity	MF	0.0221288	MF cytidine deaminase activity	Gohir.A05G029400.1, Gohir.D05G030900.1, Gohir.D13G199300.1, Gohir.A13G193500.1
GO:0009972	0.000552234	0.999981	4	6	cytidine deamination	BP	0.0221288	BP cytidine deamination	Gohir.A05G029400.1, Gohir.D05G030900.1, Gohir.D13G199300.1, Gohir.A13G193500.1
GO:0070403	0.00137612	0.999939	4	6	NAD+ binding	MF	0.0467882	MF NAD+ binding	Gohir.D04G033900.1, Gohir.A05G381400.2, Gohir.D01G048800.1, Gohir.A01G062201.1
GO:0019510	0.0032135	0.999782	4	7	S-adenosylhomocysteine catabolic process	BP	0.0879402	BP S-adenosylhomocysteine catabolic process	Gohir.D09G200200.1, Gohir.D10G138700.1, Gohir.A09G206600.1, Gohir.A10G127200.1
GO:0080048	0.00545313	0.99952	4	8	GDP-D-glucose phosphorylase activity	MF	0.124866	MF GDP-D-glucose phosphorylase activity	Gohir.A01G083300.1, Gohir.D05G373300.1, Gohir.D01G069800.2, Gohir.1Z049737.1
GO:0004013	0.00589064	0.99947	4	8	adenosylhomocysteinase activity	MF	0.132014	MF adenosylhomocysteinase activity	Gohir.D09G200200.1, Gohir.D09G200200.1, Gohir.D10G138700.1, Gohir.D10G138700.1, Gohir.A09G206600.1, Gohir.A09G206600.1, Gohir.A10G127200.1, Gohir.A10G127200.1
GO:0006546	0.00594179	0.999464	4	8	glycine catabolic process	BP	0.132014	BP glycine catabolic process	Gohir.D06G087600.1, Gohir.A06G149200.1, Gohir.D05G174600.3, Gohir.A06G089300.1
GO:0016679	0.00850641	0.999039	4	10	oxidoreductase activity, acting on diphenols and related substances as donors	MF	0.178396	MF oxidoreductase activity, acting on diphenols and related substances as donors	Gohir.A03G161000.1, Gohir.A03G160900.1, Gohir.D02G184350.1, Gohir.D02G184300.1
GO:0045158	0.0251684	0.995388	4	18	electron transporter, transferring electrons within cytochrome b6/f complex of photosystem II activity	MF	0.375784	MF electron transporter, transferring electrons within cytochrome b6/f complex of photosystem II activity	Gohir.A03G161000.1, Gohir.A03G160900.1, Gohir.D02G184350.1, Gohir.D02G184300.1
GO:0003871	0.0299586	0.994686	4	12	5-methyltetrahydropteroyltriglutamate-homocysteine S-methyltransferase activity	MF	0.422812	MF 5-methyltetrahydropteroyltriglutamate-homocysteine S-methyltransferase activity	Gohir.A13G164600.1, Gohir.A13G164600.1, Gohir.D11G314900.1, Gohir.D11G314900.1, Gohir.D08G236300.1, Gohir.D08G236300.1, Gohir.D13G167400.1, Gohir.D13G167400.1
GO:0010089	0.0321027	0.993777	4	16	xylem development	BP	0.445048	BP xylem development	Gohir.A12G156600.1, Gohir.D13G145200.1, Gohir.A07G156400.2, Gohir.D07G162700.1
GO:0003866	0.00423624	0.99988	3	4	3-phosphoshikimate 1-carboxyvinyltransferase activity	MF	0.105623	MF 3-phosphoshikimate 1-carboxyvinyltransferase activity	Gohir.A12G101500.1, Gohir.D12G104500.1, Gohir.A07G146300.1
GO:0009644	0.00529695	0.999719	3	6	response to high light intensity	BP	0.124866	BP response to high light intensity	Gohir.D10G159300.1, Gohir.D09G228900.1, Gohir.A09G227900.1
GO:0051091	0.0138809	0.998766	3	8	positive regulation of DNA-binding transcription factor activity	BP	0.234201	BP positive regulation of DNA-binding transcription factor activity	Gohir.D11G322600.1, Gohir.A11G307100.1, Gohir.A10G187100.1
GO:0004781	0.0180279	0.998482	3	6	sulfate adenylyltransferase (ATP) activity	MF	0.295289	MF sulfate adenylyltransferase (ATP) activity	Gohir.A09G220000.1, Gohir.A09G220000.1, Gohir.A05G187500.1, Gohir.A05G187500.1, Gohir.D02G041400.1, Gohir.D02G041400.1
GO:0061929	0.0258659	0.997076	3	8	gamma-glutamylaminecyclotransferase activity	MF	0.381863	MF gamma-glutamylaminecyclotransferase activity	Gohir.A03G000100.1, Gohir.A08G221652.1, Gohir.D08G240800.1
GO:0005534	0.0377254	0.995045	3	8	galactose binding	MF	0.509975	MF galactose binding	Gohir.D01G023559.1, Gohir.A05G001832.1, Gohir.A06G107500.1
GO:0003855	0.0422083	0.994198	3	8	3-dehydroquinate dehydratase activity	MF	0.550672	MF 3-dehydroquinate dehydratase activity	Gohir.D09G060500.1, Gohir.D13G103600.1, Gohir.D08G235700.1
GO:0004764	0.0422083	0.994198	3	8	shikimate 3-dehydrogenase (NADP+) activity	MF	0.550672	MF shikimate 3-dehydrogenase (NADP+) activity	Gohir.D09G060500.1, Gohir.D13G103600.1, Gohir.D08G235700.1, Gohir.D08G235700.1
GO:0032981	0.0452028	0.993133	3	10	mitochondrial respiratory chain complex I assembly	BP	0.582961	BP mitochondrial respiratory chain complex I assembly	Gohir.D06G138800.1, Gohir.A06G133700.1, Gohir.A05G138000.1
GO:0003865	0.00544202	1	2	2	3-oxo-5-alpha-steroid 4-dehydrogenase activity	MF	0.124866	MF 3-oxo-5-alpha-steroid 4-dehydrogenase activity	Gohir.A04G088000.1, Gohir.D04G128400.1
GO:0008202	0.00544202	1	2	2	steroid metabolic process	BP	0.124866	BP steroid metabolic process	Gohir.A04G088000.1, Gohir.D04G128400.1
GO:0004452	0.00885089	1	2	2	isopentenyl-diphosphate delta-isomerase activity	MF	0.180776	MF isopentenyl-diphosphate delta-isomerase activity	Gohir.A08G225900.1, Gohir.D08G246300.1
GO:0008115	0.00886155	1	2	2	sarcosine oxidase activity	MF	0.180776	MF sarcosine oxidase activity	Gohir.D06G107000.1, Gohir.A06G104800.1
GO:0046653	0.00886155	1	2	2	tetrahydrofolate metabolic process	BP	0.180776	BP tetrahydrofolate metabolic process	Gohir.D06G107000.1, Gohir.A06G104800.1
GO:0010242	0.00924563	1	2	2	oxygen evolving activity	MF	0.181993	MF oxygen evolving activity	Gohir.D11G194600.1, Gohir.A11G188100.1
GO:0004846	0.00947814	1	2	2	urate oxidase activity	MF	0.183449	MF urate oxidase activity	Gohir.D04G017100.1, Gohir.A05G398800.1
GO:0008942	0.00948308	1	2	2	nitrite reductase [NAD(P)H] activity	MF	0.183449	MF nitrite reductase [NAD(P)H] activity	Gohir.D05G254800.1, Gohir.A05G252900.1
GO:0006637	0.00983249	1	2	2	acyl-CoA metabolic process	BP	0.188582	BP acyl-CoA metabolic process	Gohir.A11G088400.2, Gohir.D11G092700.2
GO:0005982	0.0102481	1	2	2	starch metabolic process	BP	0.189922	BP starch metabolic process	Gohir.A05G393800.1, Gohir.D04G021000.1
GO:0007623	0.0102481	1	2	2	circadian rhythm	BP	0.189922	BP circadian rhythm	Gohir.A05G393800.1, Gohir.D04G021000.1
GO:0019203	0.0102481	1	2	2	carbohydrate phosphatase activity	MF	0.189922	MF carbohydrate phosphatase activity	Gohir.A05G393800.1, Gohir.D04G021000.1
GO:0046422	0.0108696	1	2	2	violaxanthin de-epoxidase activity	MF	0.189922	MF violaxanthin de-epoxidase activity	Gohir.D11G250400.4, Gohir.A11G241000.2
GO:0003904	0.0108765	1	2	2	deoxyribodipyrimidine photo-lyase activity	MF	0.189922	MF deoxyribodipyrimidine photo-lyase activity	Gohir.D03G158300.1, Gohir.A03G011600.1
GO:0003913	0.0109368	1	2	2	DNA photolyase activity	MF	0.189922	MF DNA photolyase activity	Gohir.A06G107000.1, Gohir.D06G109200.1
GO:0015204	0.0109379	1	2	2	urea transmembrane transporter activity	MF	0.189922	MF urea transmembrane transporter activity	Gohir.A03G179800.2, Gohir.D02G202952.1
GO:0071918	0.0109379	1	2	2	urea transmembrane transport	BP	0.189922	BP urea transmembrane transport	Gohir.A03G179800.2, Gohir.D02G202952.1
GO:0009638	0.0109852	1	2	2	phototropism	BP	0.189922	BP phototropism	Gohir.D08G221400.1, Gohir.A08G204100.1
GO:0033617	0.0216339	0.999062	2	4	mitochondrial respiratory chain complex IV assembly	BP	0.339487	BP mitochondrial respiratory chain complex IV assembly	Gohir.A02G035000.1, Gohir.D02G041800.1
GO:0006144	0.0275233	0.999027	2	3	purine nucleobase metabolic process	BP	0.401054	BP purine nucleobase metabolic process	Gohir.D04G017100.1, Gohir.A05G398800.1
GO:0006069	0.0294395	0.998919	2	3	ethanol oxidation	BP	0.418116	BP ethanol oxidation	Gohir.D07G209500.1, Gohir.A07G203300.2
GO:0051903	0.0294395	0.998919	2	3	S-(hydroxymethyl)glutathione dehydrogenase activity	MF	0.418116	MF S-(hydroxymethyl)glutathione dehydrogenase activity	Gohir.D07G209500.1, Gohir.A07G203300.2
GO:0016730	0.0387479	0.997686	2	4	oxidoreductase activity, acting on iron-sulfur proteins as donors	MF	0.517083	MF oxidoreductase activity, acting on iron-sulfur proteins as donors	Gohir.D07G224700.1, Gohir.A07G217600.1
GO:0031083	0.044636	0.997114	2	4	BLOC-1 complex	CC	0.578978	CC BLOC-1 complex	Gohir.D03G144300.1, Gohir.A03G024200.1
GO:0008446	0.0462857	0.996946	2	4	GDP-mannose 4,6-dehydratase activity	MF	0.586809	MF GDP-mannose 4,6-dehydratase activity	Gohir.A12G060200.1, Gohir.A10G097800.1
GO:0019673	0.0462857	0.996946	2	4	GDP-mannose metabolic process	BP	0.586809	BP GDP-mannose metabolic process	Gohir.A12G060200.1, Gohir.A10G097800.1
GO:0004788	0.0484786	0.996716	2	4	thiamine diphosphokinase activity	MF	0.594458	MF thiamine diphosphokinase activity	Gohir.A12G131600.1, Gohir.A12G131600.1, Gohir.D12G135400.1, Gohir.D12G135400.1
GO:0006772	0.0484786	0.996716	2	4	thiamine metabolic process	BP	0.594458	BP thiamine metabolic process	Gohir.A12G131600.1, Gohir.D12G135400.1
GO:0009229	0.0484786	0.996716	2	4	thiamine diphosphate biosynthetic process	BP	0.594458	BP thiamine diphosphate biosynthetic process	Gohir.A12G131600.1, Gohir.A12G131600.1, Gohir.A12G131600.1, Gohir.D12G135400.1, Gohir.D12G135400.1, Gohir.D12G135400.1
GO:0030975	0.0484786	0.996716	2	4	thiamine binding	MF	0.594458	MF thiamine binding	Gohir.A12G131600.1, Gohir.D12G135400.1
