# Supplementary material for: Transcriptomic profiles of non-embryogenic and embryogenic callus cells in a highly regenerative upland cotton line (Gossypium hirsutum L.)
Source: BMC Dev Biol. 2020 Dec 2;20:25. doi: 10.1186/s12861-020-00230-4 (PMC7713314; doi:10.1186/s12861-020-00230-4)
Supplement: Supplementary file 5 — Additional file 5. Centered log2(fpkm+1) gene expression clusters of NEC and EC callus. Gene expression profiles of quantile normalized FPKM values for genes that were clustered by k-means clustering in NEC and EC callus. [file 12861_2020_230_MOESM5_ESM.xlsx]

## Sheet: Sheet1
Table S5. Centered log2(fpkm+1) gene expression clusters of NEC and EC callus.
Cluster 1								Cluster 2								Cluster 3
Geneid	callus_NEC_rep1	callus_NEC_rep2	callus_NEC_rep3	callus_EC_rep1	callus_EC_rep2	callus_EC_rep3		Geneid	callus_NEC_rep1	callus_NEC_rep2	callus_NEC_rep3	callus_EC_rep1	callus_EC_rep2	callus_EC_rep3		Geneid	callus_NEC_rep1	callus_NEC_rep2	callus_NEC_rep3	callus_EC_rep1	callus_EC_rep2	callus_EC_rep3
Gohir.D05G073700.1	0.884067	1.68998	1.53369	-1.27787	-1.02897	-1.80089		Gohir.A08G217700.1	-0.572967	-0.365371	-0.69994	0.218447	0.747375	0.672455		Gohir.D10G245600.1	0.891179	1.97995	1.83359	-1.27298	-1.7318	-1.69994
Gohir.D08G080500.1	1.04805	1.73598	0.510344	-0.947916	-1.10925	-1.23721		Gohir.D11G060400.1	-1.74718	-0.596813	-0.467603	0.327018	1.44599	1.03858		Gohir.A01G137630.1	-0.0533392	2.13427	1.95435	-1.00282	-1.70345	-1.32901
Gohir.A06G165700.1	0.602422	1.42835	1.40967	-0.757496	-1.27802	-1.40493		Gohir.A13G089900.1	-0.65234	-1.05616	-0.997371	0.387632	1.23922	1.07902		Gohir.A10G227700.1	0.90865	2.25221	2.49127	-2.23694	-1.61401	-1.80117
Gohir.D13G156900.1	1.05967	1.65355	1.26449	-0.782442	-1.44566	-1.7496		Gohir.D05G061366.1	-0.239777	-0.756801	-0.664593	0.506835	0.506234	0.648102		Gohir.A06G001600.1	0.000980786	1.9781	1.77719	-0.979979	-1.32572	-1.45057
Gohir.A05G057500.1	0.656631	1.77025	1.87733	-1.27001	-1.55829	-1.47592		Gohir.A07G075600.1	-0.576999	-2.15372	-1.91264	1.18343	1.91569	1.54422		Gohir.A07G084627.1	-0.261384	1.83115	1.58946	-0.682185	-1.17266	-1.30437
Gohir.D01G073600.1	0.641448	0.990249	1.00125	-0.640624	-0.947886	-1.04444		Gohir.A10G035400.1	-0.397495	-0.519745	-1.0783	0.442182	0.593243	0.960116		Gohir.D02G056600.1	0.983837	2.41998	1.92923	-1.7451	-1.54077	-2.04718
Gohir.D11G111700.1	-0.124043	1.50942	1.42718	-0.734333	-1.09042	-0.987803		Gohir.D09G156600.2	-1.23916	-2.19909	-0.781091	1.35244	1.44548	1.42142		Gohir.A10G021300.1	0.840665	1.94964	2.01991	-2.23472	-1.64952	-0.92598
Gohir.D10G245300.1	0.780707	0.685084	0.636868	-0.675379	-0.854956	-0.572325		Gohir.D04G107700.1	-1.44191	-1.04534	-0.616149	0.23053	1.5245	1.34837		Gohir.D09G146800.1	0.0769721	2.52347	2.25633	-0.744716	-2.15434	-1.95771
Gohir.D13G042400.1	0.207558	1.4759	1.51025	-0.90196	-1.15118	-1.14056		Gohir.A07G211800.1	-0.407713	-1.06791	-0.866412	0.633479	0.759386	0.949171		Gohir.A11G265900.1	-0.648603	2.07796	2.09466	-1.17467	-1.17467	-1.17467
Gohir.A12G016100.1	0.330705	1.18525	1.32134	-0.763503	-0.895354	-1.17843		Gohir.D06G077950.1	-0.539335	-0.539335	-0.539335	0.243074	0.782016	0.592913		Gohir.A05G242500.2	1.21489	1.97021	2.14567	-2.14716	-1.85917	-1.32443
Gohir.A05G267600.1	0.580977	0.735879	0.378813	-0.633438	-0.551624	-0.510608		Gohir.D05G357500.1	-0.208056	-1.60027	-2.29744	1.5983	1.4371	1.07037		Gohir.D10G206000.1	0.581223	2.24734	2.21026	-1.76758	-1.73689	-1.53434
Gohir.D04G107100.1	-0.0223822	0.74163	0.915967	-0.604832	-0.505081	-0.525302		Gohir.D02G091300.1	-0.349538	-1.06943	-0.81009	0.495406	0.792743	0.94091		Gohir.A12G003300.1	-0.788304	3.16989	2.84169	-1.75145	-1.71244	-1.75939
Gohir.A06G024400.1	0.696945	0.538533	0.402182	-0.548587	-0.535814	-0.553259		Gohir.A12G187200.1	-1.12651	-0.697621	-0.76303	0.732293	0.939139	0.915727		Gohir.A05G117400.1	0.503348	2.5746	2.21075	-1.49472	-1.90814	-1.88584
Gohir.A01G068400.1	0.743671	0.878602	1.42688	-1.08816	-1.00113	-0.959867		Gohir.A05G115900.1	-0.356612	-0.81582	-0.553605	0.794721	0.5066	0.424716		Gohir.D11G025575.1	0.453389	2.21661	2.12484	-1.24165	-2.01124	-1.54195
Gohir.D02G087500.1	1.92961	1.82027	1.37996	-1.83442	-1.67186	-1.62356		Gohir.D05G192500.1	-0.437937	-0.486731	-0.658099	0.273362	0.834735	0.47467		Gohir.A05G225000.1	-0.211126	2.34626	2.25946	-1.10292	-1.76585	-1.52582
Gohir.A11G029600.2	1.22994	0.565452	0.290839	-0.793213	-0.858738	-0.434282		Gohir.1Z049609.1	-0.624053	-0.624053	-0.624053	0.0340444	0.40593	1.43218		Gohir.D02G019700.1	0.299947	2.3668	2.17506	-1.68559	-1.77631	-1.3799
Gohir.A13G050500.1	0.303838	1.18779	1.47518	-0.992101	-0.790751	-1.18396		Gohir.D13G184400.2	-0.912681	-0.621869	-1.15338	0.556741	1.40867	0.722512		Gohir.D06G066200.1	0.540343	2.21582	1.9107	-1.09901	-1.82047	-1.74738
Gohir.D07G188200.1	2.09887	1.48278	0.645054	-1.57311	-1.08049	-1.57311		Gohir.A09G094500.1	-0.632285	-1.39681	-1.39771	1.10399	0.950726	1.37209		Gohir.D04G113366.1	1.62485	2.30735	2.16244	-1.95904	-1.90904	-2.22657
Gohir.D08G020200.1	1.99924	1.42723	0.757159	-1.34445	-1.27513	-1.56404		Gohir.D08G274100.1	-0.763673	-0.667611	-0.828987	0.285158	0.66446	1.31065		Gohir.A12G148725.1	0.258589	2.03727	2.19839	-1.23178	-1.86978	-1.39269
Gohir.D02G008001.1	0.720405	0.577002	0.62883	-0.676827	-0.752958	-0.496453		Gohir.D09G044700.1	-0.362465	-1.63215	-1.56802	1.11292	1.254	1.19572		Gohir.D10G117800.1	0.700055	2.1189	1.79618	-1.38419	-1.46465	-1.76629
Gohir.D08G168700.1	-0.282919	1.3588	1.57202	-0.905252	-0.975059	-0.76759		Gohir.D10G140200.1	-0.376979	-0.564606	-0.67654	0.254153	0.760324	0.603648		Gohir.D12G003000.1	0.0727205	2.55216	2.33102	-1.50885	-1.55274	-1.89431
Gohir.A12G122300.1	1.48099	1.91894	1.67715	-1.18304	-1.9534	-1.94064		Gohir.A09G106500.1	-1.91595	-2.99239	-1.81822	2.35413	2.15668	2.21575		Gohir.A11G254700.1	0.524298	2.0459	2.22669	-2.11063	-1.47642	-1.20985
Gohir.A09G177400.1	1.51069	0.87771	0.708319	-0.899021	-1.31955	-0.878145		Gohir.A11G123000.1	-0.318135	-1.56594	-2.2913	1.51908	1.55102	1.10527		Gohir.D05G118300.1	0.428356	2.66299	2.32445	-1.39684	-2.40944	-1.60952
Gohir.D12G072800.1	0.783826	1.12712	1.06784	-0.915355	-1.07179	-0.99164		Gohir.D08G174900.1	-0.611926	-0.638507	-0.864594	1.12379	0.701947	0.289291		Gohir.D03G129900.1	0.370249	2.61008	2.85788	-1.82673	-1.81251	-2.19897
Gohir.A02G167200.1	0.565838	1.22718	1.01357	-0.99218	-1.00437	-0.810039		Gohir.A04G044800.1	-0.688002	-1.47067	-1.75804	1.18599	1.36849	1.36224		Gohir.D01G142600.1	0.0531734	2.19591	2.11468	-0.874226	-1.66575	-1.8238
Gohir.D07G055000.1	0.8487	1.94066	1.90518	-1.53234	-1.67212	-1.49007		Gohir.A01G019300.1	-0.570546	-0.570546	-0.570546	-0.106924	0.750804	1.06776		Gohir.A05G131600.1	-0.184023	1.87081	1.8024	-1.45761	-0.933702	-1.09788
Gohir.D04G054000.1	0.643809	0.465654	0.593605	-0.583622	-0.452294	-0.667151		Gohir.D05G160500.2	-0.801339	-2.09033	-2.55886	1.56806	1.94757	1.9349		Gohir.D12G221700.1	1.77254	2.55507	2.24926	-2.15154	-2.99843	-1.4269
Gohir.D13G049300.1	0.701071	1.12976	1.31713	-1.05406	-1.43029	-0.663618		Gohir.A07G191400.1	-0.711942	-1.02855	-0.759417	0.483366	0.952358	1.06418		Gohir.A10G102211.1	0.619111	1.9235	1.92965	-2.19793	-1.32038	-0.953943
Gohir.D08G183300.1	0.967852	1.43973	1.87188	-1.87525	-1.225	-1.17921		Gohir.A05G126700.3	-0.508852	-0.508852	-0.508852	0.630618	0.674476	0.221462		Gohir.D03G083500.1	0.626832	2.32903	2.19798	-1.04263	-1.96832	-2.1429
Gohir.A07G224300.1	1.50845	0.813767	0.718329	-1.3542	-0.826884	-0.859461		Gohir.A02G053500.4	-0.500971	-0.949053	-1.17911	0.841285	0.962104	0.82574		Gohir.A05G089600.1	0.151686	2.28129	2.07004	-1.87518	-1.8362	-0.791643
Gohir.D05G144800.1	1.99621	1.34571	1.19234	-1.7825	-1.44486	-1.30691		Gohir.A13G099900.1	-0.496628	-1.35778	-0.986367	0.705376	1.08923	1.04617		Gohir.D11G148700.1	0.487037	2.35246	1.99923	-1.55041	-1.75278	-1.53553
Gohir.D04G102600.2	0.391306	1.24179	0.773812	-0.547559	-0.489178	-1.37017		Gohir.D09G030000.1	-0.817946	-1.65919	-1.41532	1.6515	1.14474	1.09621		Gohir.D02G066400.1	0.536554	2.20728	1.8464	-1.37451	-1.53946	-1.67627
Gohir.A13G213800.1	1.97283	0.948246	0.63442	-1.32051	-0.751291	-1.4837		Gohir.A03G135900.1	-1.17792	-1.14613	-0.395561	0.616632	1.22704	0.875934		Gohir.A01G149736.1	-0.140362	1.98184	2.04577	-0.652396	-1.61844	-1.61641
Gohir.D06G087500.1	-0.0948954	1.98268	1.16197	-1.01571	-1.00924	-1.0248		Gohir.D06G180200.2	-0.943048	-1.49056	-0.873169	0.519209	1.40997	1.37759		Gohir.D11G025550.1	0.258589	2.03727	2.19839	-1.23178	-1.86978	-1.39269
Gohir.D07G220200.1	0.384952	1.31696	1.43978	-1.07139	-1.10183	-0.968476		Gohir.A09G088800.1	-0.50059	-0.447009	-0.324612	0.607068	0.544828	0.120314		Gohir.D03G161700.1	0.901416	2.74155	2.25987	-0.886145	-2.56873	-2.44796
Gohir.A10G214300.2	0.515911	1.67741	1.16317	-1.00881	-1.38284	-0.964847		Gohir.D08G101000.1	-0.524051	-0.582171	-0.622703	0.479041	0.621871	0.628014		Gohir.D06G093500.1	1.55817	2.59917	2.69015	-2.10494	-2.496	-2.24655
Gohir.A06G187700.2	1.78613	0.640241	0.083613	-0.829053	-0.78562	-0.895315		Gohir.D10G232000.1	-0.829218	-1.69711	-1.35798	1.54412	1.33798	1.00221		Gohir.D08G072500.1	0.132207	2.02174	2.27548	-0.988286	-1.72665	-1.71449
Gohir.D03G130500.1	1.76949	1.43265	1.21347	-1.38501	-1.29509	-1.73551		Gohir.A05G221600.2	-0.481259	-0.679124	-0.679124	0.662292	0.315817	0.861399		Gohir.A10G225900.1	1.75656	2.20025	2.43039	-2.27192	-2.12239	-1.99289
Gohir.A13G136501.1	0.422589	1.49942	0.491607	-0.997115	-0.65336	-0.763144		Gohir.A05G225400.1	-0.962097	-0.993408	-0.544084	0.251761	0.771768	1.47606		Gohir.A05G161100.1	1.33639	2.84733	2.59468	-1.42558	-3.22995	-2.12286
Gohir.A10G226000.1	0.7345	1.26649	1.2286	-0.914976	-1.38115	-0.933464		Gohir.A07G016900.1	-0.810266	-0.693098	-0.652118	0.987001	0.418553	0.749927		Gohir.D10G022100.2	1.11678	2.8846	2.60232	-2.60783	-1.96094	-2.03494
Gohir.A05G346600.1	0.255836	1.26672	1.07852	-0.769569	-0.943045	-0.888462		Gohir.D03G127350.1	-0.590604	-0.80152	-2.60824	1.64414	1.57757	0.778658		Gohir.A05G090900.2	-0.16209	1.80592	2.21179	-1.56322	-1.17549	-1.11691
Gohir.A06G193100.1	0.217664	0.594557	0.535043	-0.520704	-0.424353	-0.402207		Gohir.D07G061900.1	-0.706162	-1.83882	-1.52493	0.295192	2.08869	1.68603		Gohir.D08G189600.1	-0.457858	2.56517	2.43412	-1.45732	-1.77229	-1.31182
Gohir.D02G075300.1	0.145587	1.282	0.770003	-0.523468	-0.75457	-0.919551		Gohir.D09G015200.1	-0.521298	-0.57783	-0.683508	0.516243	0.448081	0.818313		Gohir.D13G046900.1	0.345342	2.65934	2.30272	-0.843668	-2.21232	-2.25142
Gohir.D03G060613.1	1.53144	2.41961	1.71918	-0.738186	-2.68756	-2.24448		Gohir.D06G035100.1	-0.683836	-0.823179	-0.676701	0.859317	0.666822	0.657578		Gohir.A01G114900.1	-0.209927	1.54062	1.98728	-1.72475	-1.01351	-0.579714
Gohir.D13G018900.1	1.60468	0.612294	0.617977	-1.12214	-0.959818	-0.752991		Gohir.D12G020500.1	-1.05389	-0.861131	-1.08108	0.920037	1.20639	0.869672		Gohir.D05G071750.1	-0.570466	1.70512	2.15155	-1.11701	-1.3171	-0.852084
Gohir.D02G061300.1	0.57603	1.48053	1.31674	-0.99629	-1.23583	-1.14118		Gohir.D02G029100.1	-0.761951	-0.923303	-1.04989	0.919591	0.979718	0.835833		Gohir.D09G070100.1	-0.297571	1.99921	1.47692	-1.06765	-1.15444	-0.956474
Gohir.D07G088000.1	-0.033226	1.3939	0.45331	-0.60466	-0.60466	-0.60466		Gohir.A02G055700.1	-0.332167	-0.502365	-0.369785	0.227456	0.547159	0.429702		Gohir.D13G059200.1	0.369603	2.14559	1.99184	-1.28481	-1.62495	-1.59727
Gohir.D05G195300.1	0.473149	0.768161	0.0751769	-0.416211	-0.474887	-0.425388		Gohir.A08G227600.1	-0.696286	-0.68026	-1.20648	1.10426	0.820051	0.658719		Gohir.D05G376600.1	-0.202075	1.79144	2.03002	-1.26498	-1.25907	-1.09533
Gohir.D01G125900.1	0.262175	1.9272	1.92388	-0.749378	-1.56126	-1.80261		Gohir.D07G237500.1	-0.367372	-0.632809	-0.632809	0.423081	0.809206	0.400702		Gohir.A11G159900.1	0.584101	2.08291	2.00078	-1.23531	-2.15864	-1.27385
Gohir.D05G212100.1	0.25027	1.5642	1.63933	-1.10749	-1.0657	-1.28061		Gohir.D05G177400.1	-0.814955	-1.27095	-0.535874	1.27499	0.188024	1.15877		Gohir.D04G123100.1	-0.29401	1.89194	2.37301	-1.04754	-1.43034	-1.49306
Gohir.D04G048900.1	2.6503	0.881161	0.823615	-1.45169	-1.45169	-1.45169		Gohir.D10G024050.1	-0.832052	-1.32413	-1.30735	1.11298	1.10806	1.24249		Gohir.A03G192900.1	0.0255416	2.38057	1.89076	-1.32686	-1.65415	-1.31586
Gohir.A03G093300.1	1.44287	1.15888	0.94521	-1.23396	-1.04721	-1.26578		Gohir.A11G126200.2	-0.856707	-1.32808	-1.50091	1.16808	1.26559	1.25203		Gohir.A07G190800.1	0.495385	1.96013	1.99867	-2.2678	-1.04053	-1.14586
Gohir.D09G031400.1	0.619568	0.782674	0.876931	-0.919262	-0.630513	-0.729399		Gohir.A06G061400.1	-1.29591	-1.36425	-0.671399	-0.0139304	1.76656	1.57893		Gohir.A05G199300.1	-0.464219	2.54845	2.87937	-0.991292	-1.67216	-2.30015
Gohir.A11G134000.1	0.575381	0.433585	0.388846	-0.541369	-0.413506	-0.442937		Gohir.D13G183600.1	-1.58357	-1.32341	-0.864701	0.968494	1.48018	1.32301		Gohir.D09G242400.1	-0.480992	2.71504	2.33775	-1.66422	-1.33667	-1.5709
Gohir.A09G097700.1	1.38132	0.422478	0.397977	-0.655582	-0.909045	-0.637148		Gohir.D08G163500.1	-0.664891	-1.03897	-0.935975	1.16135	0.630604	0.847885		Gohir.D03G138900.1	1.98489	2.99159	2.83144	-1.67488	-3.04337	-3.08968
Gohir.A09G240800.1	1.17887	1.13963	1.10623	-0.998703	-1.21807	-1.20795		Gohir.D13G225300.1	-0.660633	-1.73139	-1.25312	1.46058	1.07105	1.11351		Gohir.D01G203800.2	1.87351	2.48131	2.09006	-1.94373	-2.25057	-2.25057
Gohir.A08G010100.2	1.75479	1.34067	0.866543	-1.06524	-1.32425	-1.57252		Gohir.A10G118720.1	-0.78379	-2.03233	-1.22201	1.26586	1.33762	1.43464		Gohir.A03G008200.1	1.32706	2.15468	2.3203	-1.54749	-1.97327	-2.28128
Gohir.A10G232800.1	3.61175	0.319796	0.302453	-1.40181	-1.4137	-1.41849		Gohir.D04G179400.2	-0.428364	-0.857882	-1.41626	0.550545	1.02861	1.12335		Gohir.D08G025500.1	0.194355	2.28785	2.56461	-1.77241	-1.76595	-1.50845
Gohir.A01G082400.1	1.97185	0.882576	0.996091	-1.35849	-1.19905	-1.29298		Gohir.A06G205500.1	-0.754238	-1.2042	-1.2042	0.758168	1.32563	1.07884		Gohir.A10G205800.1	0.369619	2.73388	2.63042	-1.5524	-2.23054	-1.95099
Gohir.D05G268300.1	0.884016	1.02836	0.520834	-0.875407	-0.656522	-0.90128		Gohir.D01G210400.2	-0.328797	-1.26083	-1.3805	1.21116	0.981422	0.777536		Gohir.D11G025500.1	-1.16332	3.99796	4.18279	-2.23097	-2.38661	-2.39984
Gohir.D08G207600.1	1.02706	0.141388	0.545507	-0.38523	-0.551723	-0.776998		Gohir.A09G099900.1	-1.2036	-1.22163	-0.491934	0.22853	1.34694	1.34169		Gohir.A01G085500.1	0.251865	2.07638	1.94136	-1.51884	-1.46012	-1.29064
Gohir.A07G008800.1	0.293853	1.14809	1.23841	-0.816658	-0.817698	-1.046		Gohir.D05G100000.1	-1.30499	-1.02812	-0.203154	0.548458	1.49673	0.491076		Gohir.A02G039000.1	0.968587	2.57215	2.29551	-1.08495	-2.47118	-2.28012
Gohir.A11G025550.1	0.598642	0.618645	0.144472	-0.505758	-0.501704	-0.354296		Gohir.A11G089500.1	-0.762676	-1.80751	-2.26491	1.38019	1.68875	1.76616		Gohir.A08G190300.1	-0.398525	1.94227	2.09614	-1.25638	-1.10896	-1.27454
Gohir.D07G124300.2	0.724159	1.447	1.40544	-0.846602	-1.23067	-1.49933		Gohir.D12G106900.1	-0.940896	-0.947048	-1.03367	0.915602	0.975229	1.03078		Gohir.A04G119900.1	0.695506	1.9494	1.8579	-1.31391	-1.3826	-1.80629
Gohir.D10G250800.1	0.570252	0.465747	0.260871	-0.469003	-0.398734	-0.429133		Gohir.A04G078800.1	-0.305477	-0.623938	-0.623938	0.545987	0.296736	0.71063		Gohir.A09G241700.1	0.196526	2.42632	1.99271	-1.73242	-1.26885	-1.6143
Gohir.A12G252200.1	0.761569	0.676264	0.340106	-0.349792	-0.406884	-1.02126		Gohir.D13G117000.1	-0.243093	-0.47523	-0.551104	0.222892	0.465392	0.581143		Gohir.A02G078500.1	1.00464	2.80273	2.38659	-1.45914	-2.57446	-2.16036
Gohir.D11G168732.1	0.146328	1.03034	1.32672	-0.768436	-0.786374	-0.948584		Gohir.A10G109650.1	-0.536986	-0.779436	-0.687229	1.08529	0.807929	0.110427		Gohir.A10G143500.1	-0.0982802	3.29566	3.13762	-2.28155	-1.7311	-2.32236
Gohir.A05G352200.1	0.420191	0.891166	0.285071	-0.532143	-0.532143	-0.532143		Gohir.A11G205800.1	-0.608026	-1.9027	-1.55273	1.10364	1.40399	1.55582		Gohir.D02G161400.1	0.437941	2.06792	1.96985	-1.28623	-1.60483	-1.58465
Gohir.D05G121600.1	2.29343	1.24698	1.12938	-1.54838	-1.64384	-1.47757		Gohir.A06G082700.1	-0.901052	-1.23711	-0.997878	0.406306	1.43323	1.2965		Gohir.A05G081100.1	0.684482	1.93909	1.99772	-1.66746	-1.26398	-1.68984
Gohir.D13G173200.1	0.409312	1.9189	1.68288	-1.46055	-1.35076	-1.19978		Gohir.D08G240600.1	-0.904649	-1.67059	-1.17888	0.837914	1.50389	1.41232		Gohir.D13G127900.1	-0.881492	2.13205	2.3446	-1.39794	-1.0699	-1.12732
Gohir.A09G046700.1	0.862703	1.09621	0.818687	-0.842333	-0.912786	-1.02248		Gohir.A13G005600.1	-0.565813	-1.41452	-1.22683	0.870424	1.12043	1.21631		Gohir.D11G086200.1	0.668571	2.06205	2.41643	-2.7235	-0.818596	-1.60495
Gohir.D10G243600.1	0.699954	1.0357	0.666579	-0.703446	-0.908219	-0.790568		Gohir.D07G145500.1	-1.0109	-0.718423	-0.826732	0.975301	0.781894	0.798864		Gohir.A05G271700.1	1.07251	1.90907	2.24803	-1.54842	-1.94309	-1.73809
Gohir.D09G014900.1	2.4606	0.55313	0.969127	-1.17546	-1.5179	-1.28949		Gohir.A12G223200.1	-0.881332	-1.7411	-1.8024	1.004	1.7305	1.69034		Gohir.D11G025651.1	0.291557	2.97496	2.91354	-1.82871	-2.0151	-2.33625
Gohir.D08G116900.1	0.443731	1.11488	1.24067	-1.39875	-0.769375	-0.631152		Gohir.A04G046720.1	-0.50201	-1.09081	-1.09081	1.33034	0.566368	0.78693		Gohir.D02G213900.1	0.247351	2.17455	2.00751	-2.24187	-0.469571	-1.71797
Gohir.D12G269000.1	0.720981	0.583957	0.825066	-0.686481	-0.810134	-0.633389		Gohir.D08G077000.1	-0.3197	-0.54003	-0.54003	0.0284889	0.734977	0.636293		Gohir.A10G139300.1	1.05759	3.81449	3.51346	-2.91785	-3.54704	-1.92066
Gohir.D03G143300.1	0.228044	1.89204	1.65847	-0.865875	-1.3241	-1.58858		Gohir.A09G081400.2	-0.42106	-0.801789	-0.724546	0.539627	0.603114	0.804653		Gohir.A07G124401.1	0.588295	2.03075	2.0837	-1.56598	-1.8989	-1.23787
Gohir.D05G108400.1	0.640927	0.672064	0.817985	-0.797634	-0.526768	-0.806575		Gohir.D05G252700.1	-0.724694	-2.23207	-2.30791	1.17582	2.03671	2.05214		Gohir.D13G189828.1	0.861853	2.51044	1.59249	-1.83663	-1.2454	-1.88275
Gohir.A06G075600.1	1.21349	0.88009	1.38928	-0.888958	-0.940728	-1.65318		Gohir.A13G147400.1	-0.604002	-1.04879	-0.888915	0.767842	0.869745	0.904116		Gohir.A10G035000.1	0.184254	1.48966	1.60263	-1.59955	-1.06702	-0.609977
Gohir.D03G027300.1	1.85112	1.65004	1.15854	-1.79692	-1.40839	-1.45438		Gohir.A12G038000.1	-1.76094	-1.75169	-1.02196	1.22877	1.61299	1.69283		Gohir.D01G052800.1	-0.492266	2.41661	2.30525	-1.35636	-1.25279	-1.62045
Gohir.D06G003600.2	0.110745	0.692022	0.706097	-0.432503	-0.538181	-0.538181		Gohir.A01G126800.2	-0.633431	-1.2573	-0.4045	0.86438	0.917108	0.513742		Gohir.A13G182300.1	0.820323	2.18346	2.36588	-1.42888	-1.95032	-1.99046
Gohir.D01G169700.1	0.803772	0.970142	0.157152	-0.89953	-0.543828	-0.487708		Gohir.A11G326200.1	-0.514824	-1.07616	-0.997821	0.944189	0.812615	0.831996		Gohir.D01G007500.1	0.195018	2.91664	2.57294	-1.40279	-2.12322	-2.15859
Gohir.D11G309100.1	0.821144	1.08757	1.35037	-0.662807	-1.09744	-1.49884		Gohir.D11G185100.2	-0.341923	-0.947678	-0.830469	0.688905	0.735793	0.695372		Gohir.A05G184100.1	0.900412	2.21972	1.84648	-1.42954	-1.70984	-1.82723
Gohir.D02G045100.1	0.904257	1.4221	1.2399	-1.03976	-1.37203	-1.15447		Gohir.D04G114700.1	-0.586422	-0.905008	-0.841661	0.643446	0.853954	0.835691		Gohir.A10G132366.1	0.881589	1.79444	2.26885	-1.8379	-1.06858	-2.0384
Gohir.D12G261000.1	-0.0191524	1.127	0.948697	-0.594608	-0.582811	-0.879122		Gohir.A07G230400.1	-0.714641	-1.93703	-2.168	1.41768	1.56765	1.83435		Gohir.A05G377000.1	-0.545248	2.6821	2.13292	-1.03168	-1.97579	-1.26231
Gohir.A05G148800.1	2.13825	0.516872	0.166688	-1.08942	-0.861121	-0.871265		Gohir.D13G021200.1	-0.582718	-0.923084	-1.10615	0.222583	1.17875	1.21061		Gohir.D07G123800.1	-0.508402	2.12381	1.63576	-1.04769	-1.1724	-1.03108
Gohir.A08G010200.1	0.918494	0.914691	0.595405	-0.788819	-0.784691	-0.85508		Gohir.D05G316700.2	-0.39165	-0.699661	-0.699661	0.998113	0.418699	0.374159		Gohir.D07G128701.1	0.679249	2.6827	2.36837	-1.98905	-2.3674	-1.37387
Gohir.D12G122000.1	0.348587	1.67075	1.42392	-1.00294	-1.36201	-1.0783		Gohir.D10G204800.1	-1.21416	-2.08008	-2.64927	1.45796	2.24318	2.24236		Gohir.A01G213800.1	0.709736	2.11958	2.12506	-1.62361	-1.61435	-1.71641
Gohir.D06G010000.1	1.63488	0.512567	1.00398	-0.998179	-1.03692	-1.11633		Gohir.D08G054100.1	-0.394136	-1.93981	-0.941473	0.571157	1.41585	1.28842		Gohir.D13G234600.1	-0.429829	1.8556	2.07044	-1.13971	-1.05301	-1.30349
Gohir.D09G124500.1	2.30465	1.42299	1.02244	-1.49525	-1.59222	-1.66261		Gohir.A10G242500.1	-1.00592	-1.45118	-0.734129	0.993725	1.18802	1.00949		Gohir.A11G226200.1	0.129898	1.96129	2.02749	-1.49555	-1.40378	-1.21935
Gohir.A09G065800.1	3.71177	0.194647	-0.265715	-1.29257	-1.19711	-1.15102		Gohir.A13G117900.1	-0.56084	-2.13087	-3.54591	2.48784	1.99115	1.75862		Gohir.A10G139400.1	0.950842	3.63257	3.20952	-2.07177	-2.61942	-3.10175
Gohir.A03G126400.1	-0.472891	1.63858	1.36779	-0.829422	-0.805601	-0.898456		Gohir.A08G132700.1	-0.59092	-0.84206	-0.872943	0.544299	0.895702	0.865922		Gohir.A03G137200.1	-0.0690291	3.0031	2.56291	-1.0209	-2.04019	-2.43589
Gohir.A01G009700.1	2.69893	1.6943	1.46525	-1.88224	-2.01433	-1.96191		Gohir.D13G096525.1	-0.544929	-1.15383	-1.2595	0.862174	0.914902	1.18118		Gohir.A05G001700.1	0.335427	2.1469	1.91278	-1.13289	-1.54414	-1.71807
Gohir.D08G231900.1	1.22994	1.13947	1.46544	-1.51104	-1.12884	-1.19497		Gohir.D12G045300.1	-0.502377	-0.482503	-0.79148	0.124423	0.776713	0.875224		Gohir.A05G393300.1	-1.15682	2.49475	2.44368	-1.49156	-1.06516	-1.22489
Gohir.A11G106400.1	-0.059502	1.38456	1.40016	-0.708921	-1.12737	-0.888925		Gohir.A05G042000.2	-0.451637	-0.914123	-0.810816	0.308143	0.925737	0.942697		Gohir.D12G144700.1	1.8945	1.96033	2.54351	-1.81006	-2.01973	-2.56854
Gohir.D06G019081.1	0.283193	1.46594	1.39057	-0.79216	-1.10668	-1.24086		Gohir.D13G005100.1	-0.946184	-1.69433	-0.648939	0.257071	1.30904	1.72334		Gohir.D02G160300.1	-0.672672	2.71482	2.31145	-0.65457	-1.7884	-1.91062
Gohir.A03G026300.1	0.256026	0.513935	0.589571	-0.574732	-0.454328	-0.330472		Gohir.D11G018400.1	-0.404166	-0.836683	-0.957035	0.896162	0.817805	0.483917		Gohir.D12G211800.2	0.476272	1.91194	1.99228	-1.5573	-1.57303	-1.25016
Gohir.A03G217100.1	1.01792	0.880578	0.934077	-1.15714	-0.839778	-0.835655		Gohir.D10G214466.1	-1.10515	-1.36832	-0.444534	1.25303	0.646046	1.01892		Gohir.A11G025950.1	0.483322	2.37227	2.22647	-1.14538	-2.13766	-1.79902
Gohir.D02G217800.1	1.40295	1.76958	1.28529	-1.31312	-1.77193	-1.37277		Gohir.A06G176600.1	-1.0507	-1.33967	-0.67895	0.192731	1.73696	1.13963		Gohir.D10G222000.1	1.91298	2.42792	2.24454	-1.54203	-2.65579	-2.38762
Gohir.A07G065100.1	0.88609	0.778685	0.724817	-0.758848	-0.601526	-1.02922		Gohir.A11G089400.1	-0.890424	-1.78885	-0.927426	1.62083	1.01093	0.974945		Gohir.A05G014300.1	-1.04111	4.05588	3.69788	-1.96338	-2.58096	-2.16831
Gohir.D12G141600.1	-0.333628	1.20221	1.97752	-0.964273	-1.11177	-0.770057		Gohir.D05G183866.1	-1.04359	-1.04359	-1.04359	0.0958779	1.8014	1.2335		Gohir.D09G000401.1	-0.0744833	2.52225	2.41003	-2.39435	-1.10655	-1.3569
Gohir.D09G109200.1	2.10121	0.628273	0.464886	-1.11605	-0.856594	-1.22173		Gohir.D03G089800.1	-0.845404	-0.845404	-0.531577	0.644653	0.887083	0.690649		Gohir.D01G074500.1	-0.170323	1.95843	1.69695	-1.33152	-1.0776	-1.07594
Gohir.D05G266401.1	0.666748	0.823879	0.261769	-0.431707	-0.639316	-0.681372		Gohir.D05G120500.1	-1.13917	-1.19499	-0.940566	0.408818	1.61443	1.25149		Gohir.D05G373000.1	1.11515	2.33905	2.07763	-1.52433	-2.00858	-1.99892
Gohir.A04G063100.2	0.790497	0.79363	0.781916	-0.831145	-0.665517	-0.869382		Gohir.D11G033000.2	-0.695798	-1.28168	-1.43691	1.22423	1.12539	1.06477		Gohir.A07G159300.1	0.287221	2.50403	2.30404	-1.16083	-1.95964	-1.97482
Gohir.D12G133000.1	-0.240805	0.711947	1.08548	-0.41504	-0.57079	-0.57079		Gohir.A13G042700.1	-0.614262	-1.71295	-1.97188	1.35138	1.5887	1.35901		Gohir.A11G025800.1	1.11093	4.03391	4.18465	-3.04087	-2.97636	-3.31226
Gohir.D06G107000.1	0.771927	1.20623	0.895622	-0.802704	-1.11144	-0.95963		Gohir.D07G025500.1	-0.587056	-0.975433	-0.452754	0.882315	0.687746	0.445182		Gohir.D07G128600.1	0.292771	2.74971	2.87142	-1.49674	-2.39637	-2.0208
Gohir.A12G093600.1	2.25538	1.33584	1.5702	-2.24883	-1.27935	-1.63323		Gohir.D05G178100.1	-1.5108	-1.20813	-0.508772	0.540371	1.32447	1.36285		Gohir.A11G101600.1	1.01056	2.1408	2.54806	-1.63342	-1.9036	-2.1624
Gohir.A13G012400.3	1.53205	0.690562	0.203125	-0.804346	-0.884786	-0.736602		Gohir.A07G083300.1	-0.830543	-1.65505	-1.14127	1.46002	1.03113	1.13572		Gohir.A07G228900.1	-0.648651	1.79716	1.95144	-1.20005	-0.846018	-1.05388
Gohir.A06G067600.1	0.452171	1.52977	0.641223	-0.825083	-0.891192	-0.906888		Gohir.A11G207300.1	-0.239345	-0.956297	-0.994493	0.92803	0.776207	0.485898		Gohir.A05G061700.1	-0.0937907	2.17285	1.95457	-1.30347	-1.17693	-1.55322
Gohir.D03G045800.1	0.844931	0.93398	1.09291	-0.522012	-1.49371	-0.85609		Gohir.A03G188200.1	-0.485229	-1.05502	-0.663584	0.7892	0.526853	0.88778		Gohir.D08G271000.1	-0.640945	1.97152	2.78606	-1.31998	-1.56861	-1.22805
Gohir.A05G239700.1	1.30025	1.61002	1.5361	-1.14871	-1.64733	-1.65033		Gohir.D13G211952.1	-0.602408	-1.11179	-1.33937	1.26609	0.904201	0.883279		Gohir.D11G164501.1	-0.1393	2.94928	3.2397	-2.35411	-2.25664	-1.43893
Gohir.D04G059800.1	0.0676447	1.6705	1.24965	-0.676502	-1.17463	-1.13666		Gohir.D11G026700.1	-0.906032	-1.54427	-1.49	0.856511	1.55943	1.52437		Gohir.A01G145318.1	0.697218	2.55371	2.27732	-1.78803	-1.93978	-1.80044
Gohir.A07G028500.1	0.348764	1.49328	1.51157	-0.740732	-1.17464	-1.43824		Gohir.D09G039700.1	-1.26708	-1.78966	-1.07813	0.773278	1.68653	1.67506		Gohir.D05G223200.1	0.190167	3.29186	2.48156	-1.38587	-2.38932	-2.1884
Gohir.A09G114300.1	0.0473627	0.786342	0.876808	-0.445993	-0.611152	-0.653368		Gohir.D07G048200.1	-1.24188	-2.86532	-1.82094	1.33167	2.3012	2.29527		Gohir.A09G000148.1	-0.209657	2.34117	2.51748	-2.09862	-1.25124	-1.29913
Gohir.D02G173200.1	0.0264567	1.76704	1.50249	-1.03913	-0.913346	-1.3435		Gohir.A11G123800.1	-0.58517	-0.58517	-0.58517	-0.00792252	1.07658	0.686853		Gohir.A05G098000.1	-0.497187	3.01234	3.08064	-2.0388	-1.52782	-2.02916
Gohir.D04G054600.2	1.79104	1.51878	1.21269	-0.929186	-1.69956	-1.89376		Gohir.D11G071900.1	-0.610071	-0.471642	-0.802848	0.602505	0.625088	0.656968		Gohir.D02G195100.1	0.974393	2.4664	1.93606	-1.41673	-1.95648	-2.00365
Gohir.D03G144400.1	0.604014	0.537288	0.248848	-0.54731	-0.269267	-0.573573		Gohir.A02G159100.2	-0.755377	-1.87562	-2.12051	1.79137	1.27866	1.68148		Gohir.D05G015400.1	-0.157747	3.02197	3.0817	-1.51158	-2.17651	-2.25784
Gohir.A13G093000.1	1.32157	1.29428	0.74063	-1.0449	-1.28369	-1.02789		Gohir.D06G130650.1	-0.562043	-0.414543	-1.05978	0.599685	0.474278	0.962407		Gohir.D11G025400.1	1.24475	2.39219	2.3131	-1.80145	-2.36393	-1.78465
Gohir.D13G096400.2	0.946798	0.821304	1.05558	-0.951755	-0.951755	-0.920168		Gohir.A13G196250.1	-0.670925	-0.735121	-0.675262	-0.0680316	1.11158	1.03776		Gohir.D03G041000.2	0.573512	1.82389	2.04759	-1.72798	-1.59708	-1.11993
Gohir.A07G050500.1	0.871272	1.88846	1.64367	-1.63975	-1.18949	-1.57416		Gohir.A10G100900.1	-0.563954	-1.291	-1.56395	1.32258	1.22158	0.87474		Gohir.D05G001000.1	0.572017	2.07798	1.89587	-1.09881	-1.79609	-1.65096
Gohir.A03G008700.1	0.906025	0.952374	0.769548	-0.774788	-1.044	-0.809158		Gohir.A02G016100.1	-0.827175	-1.51911	-1.61623	0.943504	1.37183	1.64719		Gohir.A05G220400.1	0.593646	2.85587	2.10665	-1.13212	-2.36671	-2.05734
Gohir.D03G117400.1	1.52419	0.28364	0.16032	-0.496851	-0.769471	-0.701832		Gohir.D04G117100.1	-1.03679	-0.851804	-1.41074	1.15866	0.924593	1.21608		Gohir.A03G131700.2	-0.0981099	2.1648	1.54451	-1.18155	-1.27686	-1.15279
Gohir.A07G059100.1	0.749632	0.558736	0.0413639	-0.432901	-0.430124	-0.486707		Gohir.D12G099200.1	-0.444168	-1.18113	-1.22702	1.31549	0.86044	0.676389		Gohir.D04G182700.1	0.70864	2.08913	2.17622	-1.67134	-1.48043	-1.82223
Gohir.D04G186600.1	0.207772	1.41059	1.08893	-0.667372	-1.22949	-0.810433		Gohir.A12G244900.1	-0.658059	-1.48773	-1.2126	1.25443	1.05231	1.05164		Gohir.A05G000700.1	0.646049	2.41748	2.21951	-1.18571	-2.55577	-1.54156
Gohir.D07G236100.1	0.878456	0.818736	0.848211	-0.801911	-0.84298	-0.900512		Gohir.D08G125500.1	-0.512703	-1.04287	-0.721994	0.910623	0.485477	0.881469		Gohir.A06G074600.1	-0.18587	1.79538	1.81558	-1.11752	-1.01426	-1.29331
Gohir.D09G214000.1	0.624631	0.830621	0.474933	-0.952052	-0.484574	-0.493559		Gohir.D01G035001.1	-0.980128	-1.12661	-0.720369	0.958767	0.881103	0.987232		Gohir.D06G066300.1	0.00562434	2.69183	2.28243	-1.48839	-1.7321	-1.75939
Gohir.D10G250600.1	0.143591	0.854882	0.797346	-0.7176	-0.556678	-0.521542		Gohir.D04G166400.1	-0.492332	-0.492332	-0.492332	-0.100564	0.863248	0.714311		Gohir.D10G241800.1	1.61476	2.14556	2.22068	-1.77373	-2.35573	-1.85155
Gohir.D07G021200.1	0.823314	1.25307	0.149641	-0.829287	-0.567455	-0.829287		Gohir.A12G112900.1	-0.594935	-0.817505	-0.800241	0.535107	1.21621	0.461362		Gohir.A03G150400.1	-0.128362	2.02509	1.73587	-1.95442	-0.946376	-0.73181
Gohir.A06G170500.1	1.19193	1.35224	0.594789	-1.09273	-1.01355	-1.03268		Gohir.D11G347100.1	-1.13386	-1.8195	-1.42726	1.43821	1.4514	1.491		Gohir.D08G134800.1	-0.299431	1.91466	1.49637	-0.805052	-1.28034	-1.02622
Gohir.D04G070200.1	0.238091	1.31262	0.905679	-0.845178	-0.750021	-0.861192		Gohir.D02G134200.1	-0.856382	-1.55071	-1.40835	1.20094	1.26933	1.34517		Gohir.A13G229000.1	-0.641241	1.74188	1.95313	-1.14758	-0.858204	-1.04799
Gohir.A04G012300.1	0.974063	0.791067	0.696638	-0.650092	-1.17981	-0.631871		Gohir.D11G224200.1	-0.627964	-0.775337	-0.887453	0.499165	0.38612	1.40547		Gohir.D01G139000.2	-0.800292	2.33263	2.25361	-1.38748	-1.12148	-1.27699
Gohir.D13G056700.1	0.804276	1.23057	0.622425	-0.863131	-0.776685	-1.01746		Gohir.D12G019100.1	-0.738823	-0.738823	-0.738823	0.368865	1.03602	0.811586		Gohir.D08G237300.1	0.037584	2.03067	2.14489	-2.41509	-1.11808	-0.679973
Gohir.D03G131100.1	1.41759	1.46959	1.18813	-1.31354	-1.42091	-1.34084		Gohir.A07G222100.2	-0.259164	-0.609662	-0.416836	0.344162	0.273177	0.668323		Gohir.D10G035700.1	-0.125658	1.96517	1.7772	-1.68061	-0.879689	-1.05641
Gohir.A07G053100.1	0.478111	1.16877	0.719271	-0.764758	-0.893256	-0.708139		Gohir.A10G070500.1	-0.452291	-1.25351	-1.28697	0.750951	1.21902	1.02281		Gohir.A05G004000.1	0.241797	2.29271	1.81432	-1.19121	-1.61691	-1.5407
Gohir.D03G060605.1	1.49674	0.981463	0.284077	-0.709767	-0.845867	-1.20665		Gohir.A12G070600.1	-0.623228	-1.22113	-1.67425	0.809112	1.30924	1.40025		Gohir.A05G021300.1	0.945708	2.09532	2.01389	-1.57619	-1.60223	-1.87651
Gohir.D03G064400.1	0.437167	0.778447	0.316397	-0.579645	-0.466413	-0.485953		Gohir.A09G181700.1	-0.622424	-0.942414	-0.566992	0.715373	0.690166	0.726291		Gohir.A11G025701.1	0.366057	2.11947	1.95549	-1.27173	-1.67803	-1.49125
Gohir.A03G056250.1	0.466817	1.22748	0.368798	-0.646651	-0.71276	-0.703682		Gohir.D07G003300.1	-1.00144	-1.07725	-0.720403	0.571625	1.08973	1.13774		Gohir.A01G007400.1	-0.328798	2.13837	1.94548	-1.33279	-1.27099	-1.15128
Gohir.A06G004500.1	0.852334	1.16051	0.985351	-1.14275	-0.935714	-0.919731		Gohir.A13G058400.1	-0.516396	-0.413905	-0.618046	0.404855	0.506944	0.636548		Gohir.D13G063700.1	1.35909	2.5793	2.14293	-1.81194	-2.22641	-2.04296
Gohir.D03G152800.1	2.43419	1.44606	0.522467	-1.86725	-1.54763	-0.987839		Gohir.A10G126400.4	-0.378599	-0.759328	-0.667121	0.373578	0.818403	0.613067		Gohir.A10G084407.1	-0.726528	2.04272	1.88422	-1.06681	-1.06681	-1.06681
Gohir.A03G179800.2	0.574845	0.489282	0.177252	-0.54718	-0.234706	-0.459493		Gohir.D06G185900.1	-0.787461	-0.899305	-0.486188	1.07747	0.274151	0.821332		Gohir.A05G134900.1	0.0265366	2.18778	2.31742	-1.1982	-1.62298	-1.71056
Gohir.A09G049300.2	0.203826	0.929528	1.03475	-0.583051	-0.673506	-0.911542		Gohir.A13G132600.1	-0.863095	-2.68327	-2.46069	1.52136	2.15618	2.32952		Gohir.A04G050200.1	1.10158	1.95697	1.85878	-1.41676	-1.69016	-1.81041
Gohir.D11G335700.1	0.91236	0.749534	0.723759	-0.651551	-0.890392	-0.843709		Gohir.A05G251200.1	-0.24623	-1.07045	-0.838599	0.509141	0.793283	0.852851		Gohir.A04G135900.1	0.0508833	2.13478	1.69642	-1.20295	-1.31874	-1.3604
Gohir.A12G266250.1	0.612611	0.916108	1.20785	-0.711816	-0.837596	-1.18715		Gohir.A06G087100.1	-0.967044	-1.1495	-0.704178	0.752271	0.896938	1.17151		Gohir.D04G127600.1	0.432163	1.89622	1.95422	-1.71173	-1.59442	-0.976451
Gohir.D04G064200.1	0.573389	1.32688	0.844088	-0.655391	-1.07477	-1.0142		Gohir.D10G237200.1	-0.35519	-0.699887	-0.461559	0.337654	0.564437	0.614544		Gohir.D09G116400.1	1.29741	2.2039	2.39781	-1.81519	-1.78669	-2.29724
Gohir.D01G034280.1	0.172428	1.13171	1.00145	-0.733572	-0.912932	-0.659087		Gohir.A08G227000.1	-1.37876	-0.808632	-1.17182	1.1627	1.09665	1.09986		Gohir.D07G196100.1	-0.644929	2.0887	1.90955	-0.953151	-0.902726	-1.49744
Gohir.D02G018200.1	1.10621	1.5263	1.28277	-1.06512	-1.49063	-1.35954		Gohir.D07G038300.2	-0.701542	-1.50043	-1.97655	1.41796	1.33452	1.42604		Gohir.D04G179000.1	0.880331	2.52948	2.45754	-1.96006	-2.01256	-1.89473
Gohir.D10G179400.1	1.95613	1.08633	1.06022	-1.31664	-1.48656	-1.29948		Gohir.D10G118600.1	-0.833121	-1.15369	-1.19771	0.660803	1.21147	1.31225		Gohir.D01G071850.1	0.109145	2.25213	2.07856	-1.57006	-1.47535	-1.39442
Gohir.D07G117500.1	0.356026	1.00979	0.610325	-0.90821	-0.720442	-0.347495		Gohir.A08G203000.1	-0.904143	-0.659256	-0.904143	1.24544	0.837	0.385101		Gohir.D07G167100.1	0.464289	2.12876	1.78527	-1.07414	-1.95679	-1.3474
Gohir.D01G025980.1	0.294995	0.381571	0.929536	-0.540517	-0.502297	-0.563288		Gohir.D12G032200.1	-0.762689	-0.77627	-0.654984	0.325496	0.759911	1.10854		Gohir.A05G103200.1	0.3067	2.46319	2.29332	-1.83899	-1.51487	-1.70934
Gohir.D11G189500.1	1.16407	0.4408	1.00117	-0.960309	-1.11269	-0.533034		Gohir.A01G061200.1	-0.736682	-0.772802	-0.863655	0.58683	0.655384	1.13092		Gohir.A12G254900.1	0.673114	1.78872	2.16792	-1.66658	-1.00746	-1.95571
Gohir.D04G100100.2	1.61565	0.748011	0.940773	-0.960509	-1.31623	-1.0277		Gohir.D13G153600.1	-0.672434	-1.3056	-0.766203	0.97906	0.968065	0.797112		Gohir.D07G136500.1	-0.198944	1.83189	1.67589	-0.905873	-1.15001	-1.25296
Gohir.D07G179500.2	3.77582	-1.77806	3.33643	-1.77806	-1.77806	-1.77806		Gohir.A05G163300.1	-1.49623	-1.13214	-1.06918	1.28009	1.06442	1.35305		Gohir.A02G017600.1	0.0987609	1.52689	1.57539	-1.57776	-0.950099	-0.673175
Gohir.D13G223300.1	0.739952	1.39973	0.904345	-1.31903	-0.939958	-0.785037		Gohir.D10G033600.1	-1.04112	-2.29215	-1.28439	1.29158	1.65876	1.66732		Gohir.A05G366100.1	1.93008	2.39225	2.11712	-2.10517	-2.32768	-2.00661
Gohir.D11G145866.1	1.79707	0.470466	0.167806	-1.0251	-0.955592	-0.454655		Gohir.D13G199100.1	-0.931262	-1.66409	-1.43707	0.539423	1.77771	1.71529		Gohir.D05G360400.1	-0.388625	1.73372	2.21621	-1.49366	-1.23958	-0.828068
Gohir.A07G013933.1	0.488612	0.863754	0.555338	-0.554716	-0.650173	-0.702814		Gohir.A13G059900.1	-0.710873	-0.88775	-0.873	0.384993	1.02074	1.06589		Gohir.A05G222900.1	-0.144308	1.73926	1.55555	-0.764062	-1.12935	-1.2571
Gohir.D02G144700.1	0.878021	1.03756	0.78529	-0.557416	-1.37342	-0.770035		Gohir.A08G110400.1	-0.402796	-0.453796	-0.422744	0.178277	0.731208	0.369851		Gohir.D06G161000.1	0.371874	2.33365	1.81401	-1.06554	-1.75515	-1.69884
Gohir.A04G124700.1	0.301195	0.963317	1.00695	-0.544507	-1.00346	-0.723488		Gohir.D12G191066.1	-0.764004	-0.889916	-0.580167	0.506699	1.15652	0.570867		Gohir.D03G060200.1	1.16797	2.22091	2.24374	-2.3749	-1.80132	-1.45639
Gohir.D11G345500.1	1.40533	1.37128	0.906105	-1.26285	-1.54257	-0.877304		Gohir.D13G197925.1	-0.900915	-0.957751	-0.929053	0.706936	0.99979	1.08099		Gohir.A12G219500.1	2.21848	2.37702	2.13844	-2.07214	-2.9668	-1.69501
Gohir.A05G222800.2	0.199108	1.91237	1.75314	-1.018	-1.57866	-1.26796		Gohir.A08G134000.3	-0.909293	-1.32261	-0.541363	0.871533	1.03654	0.86519		Gohir.D11G166000.1	0.485074	1.93591	1.96761	-1.3092	-1.80856	-1.27084
Gohir.A09G226800.1	0.810159	1.27308	1.05208	-0.716134	-1.168	-1.25119		Gohir.D05G132200.1	-0.8348	-1.10895	-1.644	1.38006	1.15164	1.05606		Gohir.D10G206150.1	0.770282	2.30854	2.29491	-1.58839	-1.57355	-2.21179
Gohir.D10G050200.1	1.49908	1.03717	0.884649	-1.14193	-1.17615	-1.10281		Gohir.D13G143950.1	-0.517471	-0.465986	-0.656285	0.613346	0.968985	0.0574106		Gohir.D10G053800.1	0.809257	2.34762	2.108	-1.67118	-1.9685	-1.6252
Gohir.A13G189300.1	1.14946	0.460062	0.391617	-0.787654	-0.366351	-0.847134		Gohir.A11G245500.1	-0.229332	-1.96949	-2.50689	1.14851	2.08109	1.47611		Gohir.A09G068900.1	0.970075	1.79658	1.73738	-1.3865	-1.46533	-1.6522
Gohir.A09G241900.3	0.904332	0.885223	0.377188	-0.601921	-0.781001	-0.783821		Gohir.A13G078200.2	-0.275506	-0.810449	-0.854005	0.717072	0.612945	0.609942		Gohir.D10G127500.1	0.833	2.75545	2.50758	-1.44498	-2.4513	-2.19975
Gohir.D05G230200.1	0.952189	0.370655	0.490979	-0.604608	-0.604608	-0.604608		Gohir.A12G135700.2	-0.405282	-0.786011	-0.485009	0.243972	0.829876	0.602454		Gohir.A05G090400.1	-0.0946813	2.09013	2.38296	-1.52755	-1.46857	-1.38228
Gohir.A03G108200.1	1.00065	0.258498	0.469892	-0.46684	-0.632777	-0.62942		Gohir.D11G232300.1	-0.748851	-1.50993	-0.9196	0.772768	1.16033	1.24528
Gohir.D05G341300.1	1.46755	1.08051	1.09767	-0.880014	-1.38285	-1.38285		Gohir.A13G071900.1	-0.615345	-0.527349	-0.638722	0.465043	0.770669	0.545703
Gohir.D02G173500.1	0.714073	0.835953	1.17921	-0.974154	-0.69233	-1.06275		Gohir.D11G040400.1	-0.519253	-0.57673	-0.620536	0.742541	0.599084	0.374895
Gohir.D12G077200.1	1.04937	1.75824	1.24436	-1.13998	-1.47516	-1.43683		Gohir.A10G155500.1	-0.555007	-1.28759	-1.15024	0.819263	1.14899	1.02459
Gohir.D03G114500.1	1.88662	0.931449	0.773815	-1.13374	-1.25382	-1.20432		Gohir.A05G064700.1	-1.09237	-1.15129	-0.704231	1.05453	0.84573	1.04764
Gohir.A07G012100.1	0.950427	1.52503	1.38216	-1.00719	-1.61506	-1.23536		Gohir.D03G029500.1	-0.493538	-2.09331	-0.967902	1.21397	1.30362	1.03716
Gohir.D12G272100.1	0.60103	0.970699	0.927658	-0.717622	-1.02067	-0.761099		Gohir.A03G146800.1	-0.952572	-0.952572	-0.952572	1.58845	0.745202	0.524069
Gohir.D04G069300.1	0.948366	0.685107	0.69544	-0.759091	-0.685247	-0.884574		Gohir.A07G022168.1	-0.925157	-0.799715	-0.88408	0.989099	0.841697	0.778156
Gohir.D05G275600.2	0.625196	1.76937	1.57686	-1.05729	-1.07819	-1.83595		Gohir.A10G228900.1	-0.279272	-0.750436	-1.04668	0.587386	0.791043	0.697958
Gohir.D01G191900.1	1.3057	1.17907	1.45407	-1.72969	-1.19626	-1.01289		Gohir.A01G107000.2	-0.608519	-1.30628	-1.37628	0.889908	1.22973	1.17144
Gohir.A01G018600.1	0.373563	0.469628	0.31019	-0.316828	-0.432126	-0.404426		Gohir.D12G225800.1	-1.57913	-2.52189	-1.6124	1.40554	2.27569	2.0322
Gohir.D12G019900.1	0.526991	0.364277	0.657667	-0.731725	-0.402835	-0.414376		Gohir.A06G167100.1	-0.533284	-1.23604	-1.43945	1.0414	0.992373	1.175
Gohir.A09G104100.1	0.24599	0.563978	0.57707	-0.426845	-0.485521	-0.474673		Gohir.A09G032000.1	-1.05245	-1.27486	-0.772855	0.376132	1.41568	1.30836
Gohir.A13G204100.1	0.0739389	1.00259	1.19664	-0.769697	-1.03813	-0.465348		Gohir.D07G191600.1	-0.780303	-0.662571	-0.757812	0.5109	0.610363	1.07942
Gohir.A06G026300.1	1.50882	1.6148	1.30509	-0.956003	-1.84915	-1.62356		Gohir.D02G020000.1	-0.484329	-1.20815	-1.16885	0.177064	1.24965	1.43461
Gohir.A03G167700.1	1.1838	0.98721	0.821155	-1.11997	-1.18836	-0.683832		Gohir.D05G147600.1	-1.12419	-0.9398	-0.336703	0.42277	0.629513	1.34841
Gohir.A10G173250.1	0.817749	0.979367	0.130586	-0.431031	-0.748335	-0.748335		Gohir.D05G332700.1	-0.193336	-1.57369	-1.50686	0.963662	1.32113	0.989096
Gohir.D09G000301.1	0.00139193	1.1261	0.577154	-0.665375	-0.596091	-0.443178		Gohir.D04G067100.1	-0.832106	-1.53444	-1.32225	1.23045	1.38227	1.07607
Gohir.A04G072100.1	1.86348	0.69492	0.726189	-1.13975	-0.834298	-1.31054		Gohir.A03G064000.2	-0.627154	-0.68592	-0.554955	0.941954	0.316221	0.609854
Gohir.D13G179300.1	0.891157	1.98354	1.67604	-1.06674	-1.89474	-1.58926		Gohir.D12G125800.1	-0.861251	-1.59339	-0.796274	1.07711	1.13061	1.04321
Gohir.D09G228900.1	1.31205	1.45351	1.32712	-1.28446	-1.36195	-1.44626		Gohir.D05G317400.1	-0.39359	-0.61392	-0.300094	0.143957	0.785524	0.378123
Gohir.A06G051800.1	2.16656	1.2069	0.427448	-0.843546	-1.37224	-1.58512		Gohir.A02G088800.1	-0.631101	-2.84053	-3.83332	2.81215	2.29802	2.19478
Gohir.D10G057400.1	1.16265	0.846856	1.28153	-1.42469	-0.768056	-1.09829		Gohir.D07G155100.1	-0.367159	-1.03932	-1.14199	1.0133	0.7278	0.807365
Gohir.A11G263000.1	0.216922	1.64919	0.854728	-0.846463	-0.897483	-0.976893		Gohir.D11G067750.1	-1.358	-1.358	-1.358	2.71754	2.71445	-1.358
Gohir.A12G022400.1	0.760934	0.86477	0.784014	-0.564463	-0.801923	-1.04333		Gohir.D12G059900.1	-0.912017	-1.44009	-1.14632	0.533524	1.63106	1.33384
Gohir.D12G062900.1	0.195121	0.732922	0.75964	-0.63029	-0.455093	-0.6023		Gohir.D13G145132.1	-0.349173	-1.79334	-1.90545	1.32711	1.1256	1.59526
Gohir.D08G249300.1	2.78129	1.5035	1.71271	-2.14575	-1.7132	-2.13854		Gohir.A03G162400.1	-0.565964	-0.866662	-0.664293	0.660797	0.493014	0.943107
Gohir.D01G025700.2	0.846793	1.02751	1.00805	-0.756792	-1.07984	-1.04572		Gohir.D03G067300.1	-0.913695	-0.913695	-0.705802	0.576362	0.784079	1.17275
Gohir.A11G013100.1	1.34932	0.552085	0.348994	-0.669186	-0.769282	-0.811927		Gohir.A10G097700.1	-0.466948	-1.94048	-1.59126	0.609653	1.84678	1.54225
Gohir.D10G211850.1	0.572718	0.415574	0.728666	-0.367756	-0.674602	-0.674602		Gohir.A13G176200.1	-0.688792	-2.17917	-1.20468	1.70928	1.29583	1.06752
Gohir.D10G239400.2	-0.405656	1.61446	1.58584	-0.87739	-0.897126	-1.02013		Gohir.A01G126200.1	-0.33603	-0.55764	-0.633515	0.505954	0.787641	0.233591
Gohir.A13G041700.1	2.40366	1.22391	1.21135	-1.58945	-1.3589	-1.89057		Gohir.A03G192400.1	-0.282058	-0.579543	-0.579543	0.429804	0.318859	0.69248
Gohir.A13G073600.1	1.79119	1.00492	1.13555	-1.64488	-0.964237	-1.32254		Gohir.A01G211000.4	-0.341348	-0.68224	-0.550153	0.582408	0.667362	0.323971
Gohir.D10G244500.2	0.695481	0.960494	1.054	-0.958029	-0.92555	-0.826393		Gohir.A08G235600.1	-0.771948	-1.96619	-1.84942	1.68402	1.62869	1.27485
Gohir.D03G070200.1	0.37277	1.71404	1.79064	-1.67008	-1.21727	-0.990096		Gohir.D13G034900.1	-0.737551	-1.1197	-0.940749	0.949566	0.996993	0.851438
Gohir.A06G161600.1	-0.0844243	1.40571	0.904775	-0.661615	-0.973063	-0.591384		Gohir.A05G065800.1	-0.596064	-1.10362	-0.852716	0.62398	1.14444	0.783976
Gohir.D06G007100.1	0.53854	1.72347	1.43904	-0.894869	-1.25521	-1.55097		Gohir.D02G142800.1	-0.342764	-1.00062	-1.04373	0.686382	0.823511	0.877223
Gohir.D04G184100.1	1.42174	0.448132	0.050082	-0.654845	-0.628128	-0.636979		Gohir.A07G116400.1	-0.463866	-1.86693	-2.23643	1.07562	1.70819	1.78342
Gohir.A02G060900.1	0.933168	1.32616	0.868405	-1.29713	-0.913883	-0.916722		Gohir.A06G123200.1	-1.08456	-1.11181	-1.23148	0.303225	1.70966	1.41497
Gohir.A10G241440.1	0.593159	0.786824	0.544265	-0.632715	-0.583699	-0.707833		Gohir.D12G013400.2	-0.532939	-0.985196	-0.773002	0.999068	0.88409	0.407979
Gohir.A07G083901.1	1.21765	0.706809	0.798533	-0.907666	-0.907666	-0.907666		Gohir.D11G047200.1	-0.611596	-0.968332	-0.69734	0.624139	0.833203	0.819926
Gohir.D11G086600.2	0.988237	1.33178	0.223096	-1.03531	-0.74883	-0.758975		Gohir.A05G224900.5	-0.945542	-1.01275	-1.19461	1.10003	1.03082	1.02205
Gohir.A12G185900.1	0.310427	0.737082	0.354538	-0.344319	-0.410454	-0.647273		Gohir.A12G055300.1	-0.394571	-1.33334	-0.762628	0.453052	1.03427	1.00321
Gohir.A06G202800.1	0.838802	1.21698	0.757104	-0.998318	-0.958623	-0.855945		Gohir.D13G141300.1	-0.346892	-1.03735	-1.13681	0.777664	0.961503	0.781885
Gohir.A10G031800.2	0.644793	1.68778	1.39836	-1.04932	-1.52827	-1.15335		Gohir.D08G221700.1	-1.07676	-1.57974	-0.681855	0.629011	1.76391	0.945441
Gohir.A01G215200.1	2.20401	1.70655	1.89809	-2.08493	-1.86695	-1.85677		Gohir.D13G129200.1	-0.592083	-1.1254	-1.03954	0.952777	0.784353	1.01989
Gohir.A02G167400.1	1.81787	1.39825	1.12103	-1.23245	-1.55533	-1.54937		Gohir.A11G254100.1	-0.369201	-0.658939	-1.04393	0.556139	0.659068	0.856867
Gohir.A10G169466.1	2.84601	-0.142352	1.01954	-1.08322	-1.47536	-1.1646		Gohir.A13G221300.1	-0.663444	-1.85202	-1.09505	1.51328	1.14266	0.954573
Gohir.D07G208900.4	0.451928	1.28972	1.44684	-0.786366	-1.11924	-1.28288		Gohir.D01G200400.1	-1.03906	-2.22245	-2.57784	1.82918	1.97675	2.03341
Gohir.A01G158000.1	-0.0818006	0.811035	1.15147	-0.73471	-0.459341	-0.686649		Gohir.D07G169400.1	-0.613011	-1.17614	-1.17476	1.32969	0.646743	0.987471
Gohir.D07G054400.1	2.91929	0.853644	0.51846	-1.43685	-1.25032	-1.60421		Gohir.D05G044700.1	-0.395195	-0.477936	-0.342939	0.146555	0.550584	0.51893
Gohir.A10G241200.1	0.752502	1.47671	1.34665	-1.22259	-1.22314	-1.13013		Gohir.D05G194000.1	-0.766712	-1.53959	-0.285888	0.838564	0.848776	0.90485
Gohir.D01G023559.1	0.6399	1.20935	1.05489	-1.26896	-0.975782	-0.659411		Gohir.D04G076700.1	-0.572917	-1.42986	-1.43796	1.03669	1.19886	1.20519
Gohir.D05G185600.1	0.9685	1.09585	0.905188	-1.01238	-0.92566	-1.0315		Gohir.D12G070300.1	-0.822504	-1.34771	-1.38995	0.462063	1.96862	1.12947
Gohir.A09G222400.1	0.64667	1.40177	1.23265	-0.859496	-1.22636	-1.19524		Gohir.D06G059200.2	-0.645897	-1.33386	-1.38251	1.3373	1.13403	0.890936
Gohir.A13G218900.1	0.854759	0.834533	0.82987	-0.773898	-0.922029	-0.823236		Gohir.A12G140900.3	-0.651693	-0.651693	-0.651693	0.493658	0.525268	0.936152
Gohir.D03G039000.1	1.37463	0.915326	-0.146055	-0.667379	-0.716942	-0.759586		Gohir.D11G250000.3	-0.549063	-1.03221	-1.2168	0.966872	0.750003	1.08119
Gohir.A09G066000.1	1.24388	1.34126	0.852937	-1.16335	-1.23445	-1.04028		Gohir.A10G025000.2	-0.688284	-1.89172	-1.32535	0.556914	1.64475	1.70369
Gohir.A12G225100.1	0.16458	1.02094	0.926354	-0.657848	-0.677367	-0.776655		Gohir.D13G206700.1	-0.968722	-2.41116	-1.70008	1.88394	1.57659	1.61943
Gohir.D01G183600.1	0.912293	1.28683	0.670719	-0.514063	-1.16105	-1.19473		Gohir.A09G114500.2	-0.513442	-0.607871	-0.567201	0.169569	0.720482	0.798463
Gohir.A12G260600.1	-0.187002	1.35424	1.63399	-0.583755	-0.937077	-1.2804		Gohir.A06G098102.1	-0.49596	-0.49596	-0.49596	0.179404	0.609718	0.698757
Gohir.A12G119100.1	0.873485	0.272659	0.663182	-0.858343	-0.564788	-0.386196		Gohir.D02G113100.1	-0.89021	-2.51174	-1.12948	1.24393	1.70358	1.58393
Gohir.A04G065200.3	0.634929	1.86046	1.16399	-0.658057	-1.20278	-1.79854		Gohir.D02G189600.1	-0.810738	-0.628128	-0.924438	0.118906	1.0892	1.1552
Gohir.A10G191200.1	0.758546	1.56644	1.51281	-1.11541	-1.389	-1.33338		Gohir.A03G217600.1	-1.2768	-2.74016	-1.69019	1.5969	2.07095	2.0393
Gohir.D11G031900.1	0.444604	0.685019	0.912588	-0.580487	-0.772508	-0.689216		Gohir.A13G056200.1	-1.50441	-1.42092	-0.112503	0.434104	1.32081	1.28293
Gohir.D08G158600.1	0.556304	0.515258	0.477087	-0.32654	-0.611054	-0.611054		Gohir.D08G227300.1	-1.07569	-1.68237	-1.73049	0.165627	2.11431	2.20861
Gohir.D02G152800.1	0.134756	0.904791	0.649082	-0.493276	-0.61684	-0.578512		Gohir.D13G106700.1	-0.404637	-1.14524	-1.32825	0.439719	1.15517	1.28324
Gohir.A06G006400.1	0.855157	0.638943	0.573468	-0.431107	-0.933947	-0.702514		Gohir.D07G031800.1	-0.725944	-1.26748	-1.42886	1.09997	1.39694	0.925372
Gohir.D03G066100.2	1.28749	0.744047	0.444899	-1.02515	-0.877029	-0.574256		Gohir.D11G074000.1	-1.18945	-1.18945	-1.18945	0.880937	2.02607	0.661347
Gohir.D10G057300.1	0.224546	1.06234	0.648364	-0.666592	-0.689965	-0.578695		Gohir.D11G341700.5	-0.42331	-0.694932	-0.37776	0.544518	0.619435	0.332048
Gohir.D11G086150.1	1.02147	1.72116	0.325092	-1.02257	-1.02257	-1.02257		Gohir.D11G223600.1	-0.458069	-0.755769	-0.677827	0.201856	0.835662	0.854147
Gohir.A05G353800.1	0.490822	0.804152	0.601616	-0.616044	-0.598241	-0.682305		Gohir.D01G117100.4	-0.876015	-1.6667	-1.07038	1.24176	1.28019	1.09114
Gohir.D09G156400.1	0.600573	0.877887	0.870162	-0.812478	-0.624328	-0.911816		Gohir.D09G117300.1	-0.348363	-1.53565	-1.05687	1.60861	0.887407	0.44487
Gohir.D06G086100.1	0.812052	1.17031	1.36299	-0.877657	-1.2689	-1.19879		Gohir.A11G153200.1	-0.428958	-0.897411	-0.955641	0.510309	0.889128	0.882573
Gohir.A07G125900.2	0.676069	0.441939	0.425074	-0.596807	-0.526877	-0.419399		Gohir.A11G286200.1	-2.07921	-0.663346	-0.566866	0.8815	0.702014	1.72591
Gohir.A01G188600.1	0.681191	0.656877	0.959416	-0.869977	-0.941073	-0.486434		Gohir.A08G205000.1	-0.956481	-0.515848	-0.381885	0.274739	0.796237	0.783237
Gohir.A10G112100.2	2.38464	1.66524	1.21939	-1.55945	-1.57919	-2.13062		Gohir.D03G154600.1	-0.5487	-0.5487	-0.5487	-0.115741	1.12214	0.639701
Gohir.A04G129706.1	1.01061	0.346384	0.62616	-0.683599	-0.683599	-0.61596		Gohir.D04G105100.1	-0.244573	-0.579316	-0.577975	0.466216	0.601296	0.334352
Gohir.A10G058400.1	0.963059	1.17458	1.19946	-1.70355	-0.976549	-0.657		Gohir.D11G194200.1	-1.06326	-0.421423	-1.11632	0.661517	1.01895	0.920537
Gohir.D05G318000.1	3.43248	1.15931	1.55605	-2.55965	-1.72454	-1.86366		Gohir.A05G402100.1	-0.822777	-2.08326	-1.47499	1.7679	1.29895	1.31419
Gohir.D10G025300.1	1.25011	0.831921	0.147439	-0.729808	-0.847503	-0.652156		Gohir.A05G289700.1	-0.491207	-1.12348	-0.822473	1.12718	0.621977	0.687996
Gohir.D10G141800.1	0.678612	0.413943	0.543992	-0.477087	-0.603832	-0.555629		Gohir.D11G083700.1	-0.750255	-3.47235	-0.836691	1.1281	2.14238	1.78881
Gohir.D05G163801.1	-0.138376	1.47821	1.35313	-0.663608	-0.873349	-1.156		Gohir.D08G044300.1	-0.571445	-2.11878	-2.75941	1.42184	1.98375	2.04404
Gohir.A08G151000.2	0.851407	1.76702	1.61242	-1.5692	-1.39643	-1.26522		Gohir.A06G060800.1	-0.640263	-1.77408	-1.53581	1.67389	1.36637	0.909886
Gohir.D09G064800.1	2.66128	2.13322	2.41291	-3.00179	-2.36415	-1.84147		Gohir.D10G001900.1	-0.341454	-1.179	-1.00734	1.03182	0.827499	0.66847
Gohir.D05G219100.1	1.12649	1.04842	1.23093	-1.35403	-0.697766	-1.35403		Gohir.A06G209400.1	-0.633107	-1.39418	-1.51983	0.8542	1.36066	1.33226
Gohir.D05G357356.1	1.16648	0.186312	0.459864	-0.572442	-0.658598	-0.581618		Gohir.A07G060100.1	-0.72362	-2.17258	-1.69205	2.05499	1.34664	1.18662
Gohir.D05G263250.1	0.725883	0.427311	0.650166	-0.730013	-0.594728	-0.478618		Gohir.A05G009600.2	-0.425766	-0.73483	-0.64626	0.66732	0.670523	0.469013
Gohir.A02G016600.1	0.905799	1.4092	1.03881	-1.30628	-0.915115	-1.13242		Gohir.D11G284900.1	-1.22664	-1.53607	-0.697473	0.606676	1.47399	1.37953
Gohir.D05G034100.5	1.36541	1.38576	1.03539	-1.3594	-1.40488	-1.02229		Gohir.D03G161200.1	-0.69222	-0.53001	-0.513346	0.50753	0.295464	0.932582
Gohir.D06G170900.1	0.553578	0.86579	0.998986	-0.469787	-1.1331	-0.815465		Gohir.D04G058300.1	-0.244442	-1.07161	-0.676553	0.620175	0.7283	0.644126
Gohir.D11G265000.1	0.663983	1.69932	1.79377	-1.241	-1.72052	-1.19556		Gohir.A05G159400.1	-0.838754	-2.45115	-1.24902	1.30005	1.5518	1.68707
Gohir.A06G166200.1	0.0138332	1.29924	1.26466	-0.891694	-0.64961	-1.03642		Gohir.D03G023900.1	-0.496002	-1.06123	-1.09672	1.20397	0.795032	0.65495
Gohir.D07G064250.1	0.563004	2.50333	0.995228	-1.35385	-1.35385	-1.35385		Gohir.D11G277700.2	-0.98635	-1.63617	-0.999764	1.08118	1.1019	1.43921
Gohir.A07G213820.1	0.532849	1.33742	1.48727	-1.24722	-0.982599	-1.12771		Gohir.A05G106500.1	-0.378916	-0.569346	-0.524531	0.18746	0.485242	0.800091
Gohir.D13G071100.1	0.46123	0.948666	1.04572	-1.05321	-0.491834	-0.91057		Gohir.A05G005300.1	-0.839817	-1.21517	-1.38455	1.53089	1.11923	0.789414
Gohir.D06G054500.2	0.588598	0.613725	0.341528	-0.622573	-0.280249	-0.64103		Gohir.D06G100700.1	-0.92511	-0.821944	-0.605701	0.55213	1.14673	0.653899
Gohir.D07G171900.1	1.11724	1.09593	1.41376	-1.21472	-1.03144	-1.38077		Gohir.A09G173700.1	-0.383663	-0.742767	-0.640795	0.722687	0.447336	0.597201
Gohir.A05G374600.1	0.245734	1.08234	1.10455	-0.873237	-0.619881	-0.939498		Gohir.D05G282000.1	-1.08409	-0.733091	-1.39465	0.290483	1.11786	1.80348
Gohir.D05G244700.1	0.287529	0.835379	0.631522	-0.333479	-0.836299	-0.584652		Gohir.D04G118400.1	-0.713504	-0.713504	-0.713504	0.183349	0.99711	0.960053
Gohir.1Z049558.1	-0.0388329	0.978189	1.05769	-0.729198	-0.511348	-0.756498		Gohir.A09G100000.1	-0.922208	-1.17558	-0.756698	0.824235	1.08752	0.942727
Gohir.D09G063700.1	1.37254	1.72794	1.51731	-1.70798	-1.38902	-1.5208		Gohir.D06G144201.1	-1.02717	-1.02717	-1.02717	0.818423	1.3205	0.942582
Gohir.D11G049000.1	0.520133	1.1153	0.751135	-0.839623	-0.552456	-0.994486		Gohir.D10G005200.1	-0.560247	-0.560247	-0.560247	1.12053	-0.140169	0.700381
Gohir.A09G120300.1	-0.206603	1.44294	1.52097	-1.21853	-0.867663	-0.671112		Gohir.D04G017480.1	-0.594966	-0.594966	-0.594966	-0.0450504	0.385425	1.44452
Gohir.A12G226400.1	2.17542	1.89624	2.0794	-2.14747	-2.06688	-1.93671		Gohir.A07G017800.1	-1.13749	-2.09861	-1.75439	1.01065	1.97372	2.00613
Gohir.D05G374100.1	-0.075902	1.12284	0.639795	-0.5199	-0.637595	-0.529238		Gohir.D01G046700.1	-0.66416	-0.732457	-1.5471	0.938833	1.10984	0.895048
Gohir.A04G112012.1	1.29323	1.2711	0.983238	-1.18246	-1.36899	-0.996124		Gohir.A11G011400.1	-0.849898	-0.835338	-0.884455	0.302166	1.36892	0.898607
Gohir.D12G073700.1	0.886125	1.30867	1.24367	-1.31926	-1.01654	-1.10267		Gohir.D10G215733.1	-0.544196	-0.544196	-0.544196	0.807998	0.314979	0.509611
Gohir.D05G188900.1	1.1277	0.751542	0.63794	-0.628527	-0.757086	-1.13157		Gohir.D13G083600.1	-0.219232	-0.466505	-0.527244	0.495657	0.489253	0.228071
Gohir.D12G178100.1	0.747998	1.05229	0.995263	-0.374847	-1.20617	-1.21453		Gohir.A12G071000.1	-0.551195	-0.7329	-0.940834	-0.0477487	1.3296	0.943079
Gohir.A03G190500.2	0.867151	0.984118	0.787991	-0.823963	-0.87491	-0.940386		Gohir.D02G158500.1	-0.490747	-0.845692	-0.844324	0.91678	0.780647	0.483336
Gohir.A07G173600.1	1.21855	0.920161	0.482075	-0.918599	-0.824126	-0.878064		Gohir.A07G200600.1	-0.49998	-1.2808	-1.18283	0.957708	1.00923	0.996677
Gohir.A02G019800.1	0.788362	0.9432	0.676286	-0.999824	-0.589695	-0.81833		Gohir.A13G138000.1	-0.241289	-1.37253	-1.0284	0.774751	0.931355	0.936117
Gohir.D03G159600.1	0.644727	1.27395	-0.0117682	-0.635635	-0.635635	-0.635635		Gohir.D01G218600.1	-0.567265	-1.7149	-1.89838	0.914058	1.74304	1.52345
Gohir.D06G074600.1	0.668865	0.9502	1.32324	-1.14731	-0.851483	-0.943512		Gohir.D12G139600.1	-0.181541	-1.90489	-1.45466	0.663115	1.71945	1.15852
Gohir.D04G124000.1	1.84424	0.936637	0.670869	-1.17334	-1.5346	-0.743803		Gohir.A10G218300.1	-0.46207	-2.06598	-0.922513	1.0219	1.34839	1.08027
Gohir.D05G307400.2	1.70954	0.729679	0.59595	-0.938372	-1.08301	-1.01379		Gohir.A01G047900.1	-0.618793	-0.689863	-0.76188	0.544927	0.800109	0.725499
Gohir.A04G030500.1	1.47387	1.32611	0.263138	-1.14013	-1.14013	-0.782859		Gohir.A06G051201.1	-1.5498	-1.5498	-1.5498	1.37068	1.37658	1.90214
Gohir.A02G172600.1	0.474864	1.48688	1.04741	-1.09398	-0.58358	-1.33159		Gohir.D06G141500.1	-0.377685	-1.33501	-2.36567	1.59486	1.20153	1.28198
Gohir.D12G155400.1	0.328731	0.984992	0.32939	-0.647109	-0.471726	-0.524279		Gohir.D12G103400.3	-0.708075	-2.16816	-1.6585	1.12391	1.56521	1.84561
Gohir.A09G061900.1	0.238797	0.521103	0.639655	-0.520684	-0.496993	-0.381878		Gohir.A01G097700.3	-1.01826	-1.88619	-2.29327	0.776262	2.33358	2.08788
Gohir.A09G007400.1	2.33691	1.06606	1.00893	-1.10311	-1.7365	-1.57229		Gohir.A07G164600.1	-0.798485	-0.600895	-1.01882	0.565185	1.34576	0.507254
Gohir.A03G122400.1	0.658004	1.19557	1.3842	-1.4558	-1.01088	-0.771085		Gohir.D13G045800.1	-0.799809	-1.51797	-1.66848	1.04049	1.34226	1.60351
Gohir.A07G196600.1	0.98602	0.961409	0.899245	-0.827748	-0.983359	-1.03557		Gohir.A10G005800.1	-0.663563	-0.675121	-0.745123	0.737498	0.773842	0.572468
Gohir.A11G025600.1	0.271647	1.89036	1.77491	-1.00017	-1.75212	-1.18464		Gohir.A03G181400.1	-0.415419	-1.03988	-0.709965	0.829693	0.78744	0.548131
Gohir.D07G008200.3	0.57933	0.632392	0.12516	-0.520884	-0.4392	-0.376798		Gohir.A13G181850.1	-0.500455	-0.558575	-0.555998	0.107847	1.03325	0.473933
Gohir.A13G146400.1	1.72328	1.17746	1.11558	-1.15212	-1.46023	-1.40396		Gohir.A08G089000.2	-0.33796	-0.603397	-0.603397	0.705197	0.362295	0.477261
Gohir.A05G187700.1	1.96696	0.811302	0.713837	-1.26983	-1.135	-1.08726		Gohir.D11G245700.1	-0.891899	-1.43348	-0.376309	0.0438909	1.30799	1.34981
Gohir.D10G074366.1	1.13042	0.593422	1.34455	-0.900521	-1.06948	-1.0984		Gohir.D05G196766.1	-1.49694	-1.31264	-0.887117	0.802612	1.33913	1.55495
Gohir.D11G025525.1	0.283086	1.77089	2.07612	-1.1556	-1.78068	-1.19382		Gohir.D11G192800.1	-0.334385	-0.511518	-0.63187	0.363795	0.594638	0.519339
Gohir.A10G197200.1	1.04998	1.03492	0.788565	-0.83734	-1.18187	-0.854258		Gohir.D11G092300.3	-0.603733	-2.27074	-2.24093	1.56486	1.72493	1.82562
Gohir.D06G012601.1	0.253864	0.762783	0.795138	-0.647306	-0.642045	-0.522434		Gohir.A05G258500.1	-0.621197	-0.621197	-0.621197	0.192738	1.12855	0.542302
Gohir.D05G070900.1	1.29297	1.15643	0.96645	-1.06159	-1.23996	-1.1143		Gohir.A09G052800.1	-0.739676	-1.08496	-0.736447	0.78065	0.722789	1.05764
Gohir.A03G112400.2	0.691181	0.734768	0.815357	-0.604657	-0.77527	-0.861379		Gohir.D08G110100.1	-1.01268	-1.7505	-1.27851	1.40126	1.48023	1.1602
Gohir.A05G043800.1	0.159863	1.58888	1.72037	-1.16232	-0.959848	-1.34694		Gohir.A11G076300.1	-0.91392	-1.23399	-0.838326	0.78611	1.07808	1.12204
Gohir.A10G191400.2	1.53886	2.11122	1.96145	-1.30258	-2.05841	-2.25054		Gohir.A04G119100.1	-0.929123	-2.26599	-2.21245	0.765189	2.15524	2.48714
Gohir.A05G194500.1	2.08128	0.471563	0.350122	-0.905555	-0.855077	-1.14233		Gohir.A05G282900.1	-0.501878	-0.922657	-0.810315	0.654317	1.59265	-0.0121129
Gohir.D07G064200.1	1.23856	1.12292	0.773503	-0.923302	-1.18758	-1.0241		Gohir.D06G219600.1	-0.644509	-0.689391	-0.394531	0.422782	0.598896	0.706752
Gohir.D07G155016.1	1.59528	1.94251	1.86586	-1.83631	-1.59546	-1.97189		Gohir.D13G098000.1	-0.777272	-0.370191	-0.777272	0.368079	0.86196	0.694696
Gohir.D01G005800.1	1.15754	1.19827	1.21534	-0.698111	-1.3769	-1.49614		Gohir.A11G252800.1	-0.702029	-1.24646	-0.683348	-0.140387	1.48102	1.2912
Gohir.A10G112200.1	1.94898	1.30831	1.58677	-1.96423	-0.824735	-2.05509		Gohir.A09G178400.1	-0.71598	-1.12794	-0.590669	0.70409	0.840942	0.889552
Gohir.A02G051700.1	0.512701	2.09389	1.19849	-1.33317	-1.45377	-1.01814		Gohir.A12G100400.3	-0.649925	-1.78115	-1.48874	1.16939	1.45285	1.29757
Gohir.A11G316884.1	1.68407	1.72313	1.53684	-1.07694	-1.58398	-2.28312		Gohir.D04G121700.1	-0.540654	-0.931779	-1.15455	1.09062	0.830762	0.705597
Gohir.D03G055300.1	0.105803	0.698517	0.751174	-0.562393	-0.654422	-0.338678		Gohir.A01G040500.1	-0.789604	-1.84319	-2.51028	1.65425	1.67889	1.80995
Gohir.A13G211600.1	0.679512	1.22211	0.730138	-0.579883	-1.03336	-1.01851		Gohir.A08G246500.3	-0.623069	-0.7711	-0.572357	0.601225	0.653018	0.712283
Gohir.A12G253800.1	1.71884	0.839865	0.922072	-2.09429	-0.397691	-0.988795		Gohir.A06G110802.1	-0.619917	-0.817118	-1.02119	0.921616	0.784709	0.751898
Gohir.D04G089600.1	0.809606	0.550896	0.540227	-0.793799	-0.911528	-0.195401		Gohir.D09G223500.1	-0.502112	-1.65735	-1.80986	1.60559	1.2654	1.09835
Gohir.D07G011175.1	0.300725	0.79761	0.669701	-0.457085	-0.576205	-0.734745		Gohir.A02G084900.1	-0.324375	-0.550256	-0.5976	0.545471	0.567101	0.359659
Gohir.A01G204000.1	1.99546	2.10359	1.93622	-1.40767	-2.46624	-2.16135		Gohir.D04G131050.1	-0.632196	-0.806779	-0.790614	-0.0836974	1.27357	1.03971
Gohir.D05G008300.1	3.79515	3.23978	-1.75873	-1.75873	-1.75873	-1.75873		Gohir.D13G121601.1	-0.487238	-2.52698	-3.71669	2.53499	2.37953	1.81639
Gohir.D01G041100.1	2.03445	0.852295	0.0361313	-0.61355	-1.10214	-1.20719		Gohir.D13G121100.1	-0.487238	-2.52698	-3.71669	2.53499	2.37953	1.81639
Gohir.D08G010300.1	0.654172	0.709506	0.54945	-0.579194	-0.799532	-0.534403		Gohir.D11G312900.2	-0.544385	-0.311149	-0.411805	0.267527	0.56275	0.437063
Gohir.D12G124000.1	0.362095	0.587529	0.652477	-0.481098	-0.584603	-0.5364		Gohir.A03G175650.1	-0.883587	-0.883587	-0.883587	0.653958	1.32555	0.671248
Gohir.A09G070100.1	1.76306	0.886269	0.908856	-1.13841	-1.15941	-1.26037		Gohir.A07G154500.1	-0.409569	-0.583336	-0.583336	0.821567	0.502088	0.252588
Gohir.A03G013900.1	1.25343	0.954472	0.665136	-0.616758	-1.32988	-0.926399		Gohir.A04G067400.1	-0.694809	-1.61317	-0.707146	1.04692	1.00083	0.967374
Gohir.D03G159800.1	0.367784	1.0013	0.346557	-0.413309	-0.538531	-0.763806		Gohir.D13G035000.1	-0.85319	-1.69257	-1.77267	1.501	1.30054	1.5169
Gohir.A05G186000.1	1.46106	0.424004	0.976328	-1.08652	-0.894347	-0.880523		Gohir.A09G208700.1	-0.693725	-1.35091	-1.18612	-0.0812762	1.54109	1.77094
Gohir.A10G222000.1	-0.0216992	1.41784	1.69944	-0.757622	-1.15858	-1.17938		Gohir.A09G009600.1	-0.689304	-0.978349	-0.919339	0.461689	1.30191	0.823397
Gohir.D05G160900.2	0.723606	0.676508	0.551563	-0.442093	-0.812299	-0.697285		Gohir.D07G064800.1	-0.592348	-2.08701	-1.49105	1.88687	1.19106	1.09248
Gohir.D05G265900.1	2.22873	0.595187	-0.0638985	-0.994912	-0.950688	-0.814422		Gohir.D07G208750.1	-0.458899	-0.721743	-0.729774	0.585697	0.609991	0.714729
Gohir.A13G027600.1	1.65992	0.615945	0.69717	-1.30895	-0.889831	-0.774249		Gohir.A07G057150.1	-0.481267	-0.798073	-0.654495	0.716622	0.663239	0.553975
Gohir.A05G212500.1	1.16709	0.922571	0.817716	-1.00645	-1.10036	-0.800571		Gohir.D05G181000.1	-0.27707	-0.976942	-1.04359	0.862015	0.659917	0.775668
Gohir.A03G180100.1	0.597247	1.03272	0.915148	-0.712791	-0.918403	-0.913919		Gohir.D02G226500.1	-0.382787	-0.636172	-0.636172	0.432843	0.71376	0.508527
Gohir.D03G132400.1	0.644582	1.2774	0.880392	-0.973564	-0.894312	-0.934495		Gohir.D08G210300.1	-0.822733	-1.17414	-1.14473	1.19119	1.00184	0.94857
Gohir.A01G055300.1	1.2875	0.2476	0.961887	-1.20514	-0.908544	-0.383306		Gohir.A05G045000.1	-0.700791	-1.02752	-0.785331	0.57466	0.90827	1.03072
Gohir.D13G080500.3	1.27278	1.5686	1.57854	-1.63643	-1.57522	-1.20828		Gohir.A01G172600.1	-1.78602	-1.16047	-0.469807	0.059694	1.71811	1.6385
Gohir.A09G144800.1	0.158344	1.40226	0.975384	-0.582179	-0.738808	-1.215		Gohir.D13G155800.1	-0.845173	-1.33882	-1.26021	0.76793	1.18825	1.48802
Gohir.D01G214800.1	1.14178	0.864122	1.20275	-0.946205	-1.11093	-1.15151		Gohir.A07G049400.1	-0.966518	-1.6977	-1.3967	0.606518	1.73499	1.71941
Gohir.D10G135300.1	1.11757	0.332368	0.341749	-0.657701	-0.516404	-0.617579		Gohir.A07G159400.1	-1.07037	-0.926921	-1.47344	1.13233	0.778761	1.55964
Gohir.D12G120540.1	1.40852	0.944061	-0.0674691	-0.719451	-0.805096	-0.760568		Gohir.A12G216200.1	-0.418296	-0.51027	-0.51027	0.176678	0.792821	0.469336
Gohir.D05G190700.1	0.815655	1.50019	1.3554	-1.22406	-1.09152	-1.35567		Gohir.D13G093400.1	-0.592587	-1.19237	-1.23639	0.512124	1.10606	1.40316
Gohir.A06G029800.1	1.08262	1.58417	1.3019	-1.11746	-1.32134	-1.52989		Gohir.D03G036500.2	-1.29039	-0.863242	-0.446792	-0.14105	1.54194	1.19954
Gohir.D02G209300.1	1.02284	1.35068	1.24014	-1.15672	-1.09526	-1.36168		Gohir.D13G168600.1	-0.227995	-1.45495	-1.24844	1.22006	0.804565	0.906757
Gohir.A05G110800.1	0.497704	1.4631	1.0065	-0.680491	-1.23079	-1.05603		Gohir.D01G053200.1	-0.537903	-1.42922	-1.94197	0.537199	1.8104	1.5615
Gohir.A11G323500.1	0.847102	1.40478	1.11129	-1.0172	-1.15827	-1.1877		Gohir.D05G040450.1	-0.587668	-1.03245	-0.633471	1.03124	1.4121	-0.189753
Gohir.D05G302500.1	1.29202	1.987	1.23956	-1.35021	-1.71676	-1.45162		Gohir.A09G220500.1	-0.957953	-2.17462	-2.07501	1.21688	1.90168	2.08902
Gohir.A06G114602.1	1.028	1.09155	1.20934	-0.656789	-1.35682	-1.31527		Gohir.A10G045400.1	-0.631836	-1.39538	-1.24024	0.819211	1.24976	1.19849
Gohir.D06G008600.2	0.700413	0.436055	0.354894	-0.397368	-0.636721	-0.457273		Gohir.D10G143300.1	-0.793405	-1.2125	-0.942321	0.834213	1.05693	1.05708
Gohir.A09G074200.1	0.141154	1.72395	1.55228	-1.28622	-1.05007	-1.08109		Gohir.D05G232500.1	-0.476105	-1.29213	-2.33123	0.300907	2.15933	1.63922
Gohir.A11G082700.1	1.13788	0.782846	0.415245	-0.833338	-0.746902	-0.755729		Gohir.D11G112050.1	-1.78593	-1.85984	-0.754293	1.01771	2.04008	1.34228
Gohir.D02G190800.1	1.3766	1.07414	0.739717	-1.15836	-0.884953	-1.14715		Gohir.D07G059500.1	-1.18202	-1.02956	-1.14905	1.25278	0.987746	1.12011
Gohir.A08G220700.1	0.594785	1.74255	1.70563	-1.65813	-1.25113	-1.1337		Gohir.D06G067400.3	-0.718283	-1.22556	-0.852164	0.99524	0.85127	0.949495
Gohir.A02G141800.1	0.366655	1.66636	1.47207	-1.29007	-0.924938	-1.29007		Gohir.A07G075000.1	-0.757812	-1.21241	-1.65389	1.25933	1.08358	1.28119
Gohir.A03G150800.1	0.916117	1.19821	0.409487	-0.966824	-0.739413	-0.817572		Gohir.A13G032200.1	-0.511242	-1.16925	-1.02267	0.991106	0.877741	0.83432
Gohir.D13G129800.1	0.137325	0.648427	0.627696	-0.561338	-0.399128	-0.452981		Gohir.A05G382000.1	-1.01947	-1.63241	-1.14793	0.550239	1.73876	1.51081
Gohir.D13G173100.1	0.885524	0.855888	0.787669	-0.692021	-0.91853	-0.91853		Gohir.D13G190000.2	-0.574844	-0.330341	-0.398866	0.141702	0.531607	0.63074
Gohir.D03G171500.1	1.52853	1.11761	1.0269	-1.34237	-1.35608	-0.974591		Gohir.D12G068500.1	-0.977802	-1.07319	-1.31808	1.1944	1.02391	1.15076
Gohir.D02G179000.2	-0.0742452	1.12322	1.53754	-0.99713	-0.910172	-0.679212		Gohir.A06G032652.1	-0.4643	-0.343948	-0.328109	0.538582	0.579744	0.0180317
Gohir.D12G274600.2	2.02965	0.478784	0.267328	-1.21049	-0.903391	-0.661879		Gohir.D12G188000.1	-0.868248	-1.36982	-1.25729	0.195121	1.61135	1.68889
Gohir.D13G127050.1	0.184221	0.59981	1.31254	-0.708129	-0.600336	-0.788104		Gohir.A05G276500.1	-0.625157	-0.731009	-0.790571	0.291693	0.979516	0.875529
Gohir.D05G074200.2	1.12731	0.561107	0.89908	-0.741159	-1.14727	-0.69906		Gohir.A09G001700.1	-0.505802	-0.771239	-0.771239	0.914029	0.7478	0.386452
Gohir.A06G093600.1	-0.0378935	1.02977	1.11209	-0.850131	-0.586078	-0.667762		Gohir.D12G039600.1	-0.74778	-1.49527	-1.58613	1.18026	1.25484	1.39408
Gohir.A10G228300.1	1.86132	0.873831	0.219029	-0.788022	-1.10132	-1.06484		Gohir.A12G207900.1	-0.481838	-0.986964	-0.365053	0.957032	0.551793	0.32503
Gohir.D03G044000.1	0.0338516	0.59257	0.959921	-0.648193	-0.444715	-0.493434		Gohir.A07G094100.1	-0.291081	-0.679769	-1.0083	0.516167	0.506334	0.95665
Gohir.D09G098700.1	2.23412	0.938574	0.70484	-1.14997	-1.36911	-1.35845		Gohir.D05G221750.1	-0.641582	-0.523168	-1.04321	0.764142	0.941559	0.502262
Gohir.D04G130700.1	0.313306	1.78817	1.82074	-1.48512	-1.28909	-1.148		Gohir.A11G240300.2	-0.243072	-0.613153	-0.673893	0.408129	0.483798	0.638192
Gohir.A06G022800.2	1.09206	0.554637	0.208293	-0.531042	-0.661973	-0.661973		Gohir.D04G098600.1	-0.929345	-1.58818	-2.04654	1.67266	1.50914	1.38226
Gohir.A10G230800.2	0.405042	0.586793	0.298812	-0.386628	-0.483597	-0.420422		Gohir.D07G003100.2	-0.698874	-2.13533	-1.94251	1.52254	1.66188	1.59229
Gohir.D03G085600.3	0.534672	1.80578	0.58786	-0.658959	-1.1111	-1.15825		Gohir.A03G146400.1	-0.747264	-2.02465	-1.65129	2.22512	1.03841	1.15968
Gohir.A09G095000.1	1.66236	0.818439	0.72334	-0.863007	-1.21301	-1.12812		Gohir.D08G154600.1	-0.662303	-1.29287	-1.25467	1.33229	0.923606	0.953948
Gohir.D08G228800.1	1.42817	1.24163	0.823309	-0.726336	-1.18153	-1.58524		Gohir.D04G072425.1	-0.332248	-0.712978	-0.712978	0.660531	0.556056	0.541616
Gohir.A01G078700.1	0.0500916	0.764783	0.640024	-0.484966	-0.484966	-0.484966		Gohir.D05G328000.1	-0.477353	-0.243251	-0.537911	0.20208	0.550219	0.506215
Gohir.A05G034500.1	0.745622	1.31797	1.02767	-1.07874	-1.07054	-0.941979		Gohir.D07G079675.1	-1.30075	-1.51131	-0.892289	0.108328	1.78844	1.80758
Gohir.A03G038500.1	-0.195513	1.50119	1.64012	-1.0789	-0.89167	-0.975223		Gohir.A11G065600.1	-1.14942	-1.30122	-0.756526	0.111215	1.66504	1.43091
Gohir.A04G094500.1	1.06625	0.511532	0.578227	-0.718671	-0.718671	-0.718671		Gohir.A10G084300.1	-1.65607	-1.82373	-1.78255	1.2832	1.91452	2.06462
Gohir.D11G341900.1	-0.301593	1.27259	1.3083	-0.758956	-0.80126	-0.719087		Gohir.A09G226300.1	-0.873493	-1.31554	-1.059	0.372551	1.43662	1.43886
Gohir.A02G015300.1	1.64778	0.593162	-0.0446837	-0.519667	-0.935379	-0.741216		Gohir.A10G192700.1	-0.954328	-1.69819	-0.776274	1.29785	1.00334	1.12761
Gohir.A11G270500.2	0.547367	1.43404	1.27522	-1.01662	-0.953036	-1.28697		Gohir.A05G365800.1	-0.951487	-1.44903	-0.963346	0.820114	1.35763	1.18612
Gohir.D01G058100.4	0.580716	0.755307	0.762743	-0.700949	-0.66647	-0.731348		Gohir.D08G261900.1	-0.387243	-0.538169	-0.481862	0.443774	0.552808	0.410692
Gohir.D06G218900.1	0.295188	1.31278	1.06989	-1.11026	-0.701005	-0.866591		Gohir.D09G103200.1	-1.40001	-2.39413	-1.23041	2.03025	1.5388	1.4555
Gohir.D02G144200.1	0.657103	1.56496	1.20859	-0.919587	-1.31692	-1.19414		Gohir.A05G204000.1	-0.93539	-1.36995	-0.82147	0.551525	1.18341	1.39188
Gohir.A13G205800.1	1.41718	2.11025	1.49072	-1.70468	-1.81711	-1.49635		Gohir.A12G003800.1	-1.39953	-1.70313	-1.86308	0.511559	2.26476	2.18942
Gohir.D03G130200.3	0.18591	0.912912	1.24762	-0.803209	-0.652685	-0.890549		Gohir.A01G201000.1	-0.375292	-0.854099	-0.587513	0.760587	0.537936	0.518381
Gohir.D04G184200.1	1.1099	1.47151	1.00212	-0.87428	-1.35269	-1.35656		Gohir.A06G182900.1	-1.48651	-0.908738	-0.592118	0.304773	1.4911	1.1915
Gohir.A13G126300.1	0.564504	0.355698	1.17909	-0.865744	-0.596077	-0.637475		Gohir.A08G181600.3	-0.482491	-1.18466	-1.37578	1.23688	0.985394	0.820662
Gohir.A11G018800.1	0.287474	1.25444	0.891874	-0.873854	-0.978498	-0.581441		Gohir.D12G018600.1	-0.425178	-0.526828	-0.526828	0.593524	0.742205	0.143106
Gohir.A11G217500.1	1.05558	1.07079	0.59141	-0.603278	-1.0846	-1.0299		Gohir.A13G163100.2	-0.783591	-1.82216	-1.40126	0.88781	1.63875	1.48046
Gohir.A05G394400.1	1.5953	0.77942	0.536542	-1.5498	-0.670963	-0.690506		Gohir.D09G041050.1	-0.76657	-1.78275	-1.99261	1.43854	1.57651	1.52688
Gohir.D08G134700.1	0.979477	0.779478	0.209025	-0.797728	-0.737133	-0.433118		Gohir.A07G027500.1	-0.730153	-0.503577	-0.57815	0.148575	0.929413	0.733892
Gohir.D10G128100.1	-0.477976	1.97892	1.3222	-1.23157	-0.708488	-0.883096		Gohir.D12G209800.1	-0.800802	-1.41125	-0.821656	0.854734	1.13159	1.04738
Gohir.A10G061400.2	1.30628	1.86923	1.5442	-1.5043	-1.52046	-1.69496		Gohir.A10G078150.1	-0.586906	-0.86511	-0.306041	0.979847	0.190701	0.58751
Gohir.A08G137300.7	1.38635	0.573837	0.160306	-0.777792	-0.564911	-0.777792		Gohir.D08G178000.1	-0.814271	-1.18499	-0.656922	0.290092	1.36935	0.996745
Gohir.A07G013100.1	0.721551	0.940566	0.925612	-0.937288	-0.776365	-0.874076		Gohir.A07G222300.1	-0.527674	-0.589125	-0.768892	0.787063	0.457791	0.640836
Gohir.A01G130500.1	1.61654	0.870368	0.542099	-0.551435	-1.03652	-1.44105		Gohir.D12G159500.1	-0.531363	-1.33307	-1.66854	1.10778	1.341	1.08419
Gohir.D04G174800.1	0.178651	0.721387	0.395015	-0.323419	-0.574161	-0.397474		Gohir.D06G048400.1	-0.512844	-0.989427	-0.922313	0.708951	1.13649	0.579141
Gohir.A02G150500.1	1.35681	1.00611	0.816881	-0.59821	-1.22782	-1.35377		Gohir.A10G175600.1	-0.436602	-0.641672	-0.886559	0.295498	1.08393	0.585409
Gohir.D01G044000.7	1.35229	1.1537	0.865219	-0.655117	-1.22381	-1.49228		Gohir.A02G168800.1	-0.760911	-1.58816	-1.84073	1.80324	1.26685	1.11972
Gohir.A13G157500.2	1.33683	1.50006	1.44602	-1.66594	-1.31714	-1.29983		Gohir.D10G029500.1	-0.618707	-1.99696	-2.19127	2.00444	1.29078	1.51172
Gohir.A03G150600.1	0.454961	0.472202	0.731457	-0.525963	-0.551869	-0.580787		Gohir.D03G145600.1	-0.664956	-1.30377	-1.30578	1.00176	1.15977	1.11298
Gohir.A03G103000.1	0.292833	1.32346	1.30541	-0.573039	-1.21801	-1.13065		Gohir.A03G100000.1	-0.671873	-1.10956	-1.20389	1.24177	0.950357	0.793186
Gohir.D10G016500.1	1.65637	2.16885	1.68061	-1.18124	-2.22895	-2.09564		Gohir.D11G247300.1	-2.64367	-2.64367	-2.64367	2.7846	2.17707	2.96936
Gohir.D01G188100.1	0.427849	0.892312	0.878337	-0.734456	-0.937363	-0.52668		Gohir.A06G196900.1	-0.612059	-1.29526	-1.58772	1.22547	1.22741	1.04217
Gohir.D06G002480.1	0.686665	1.2416	0.639933	-0.9427	-1.01152	-0.613981		Gohir.D01G176925.1	-0.315623	-0.645608	-0.568365	0.436414	0.472752	0.620429
Gohir.A11G170100.1	1.37825	0.523648	0.460828	-0.859126	-0.910589	-0.593012		Gohir.D07G151800.1	-0.216939	-0.791075	-0.953905	0.621869	0.682588	0.657462
Gohir.A12G173933.1	1.45636	0.996002	0.884834	-0.917444	-1.14774	-1.27201		Gohir.D05G310400.1	-0.845315	-1.14134	-0.873542	0.879017	0.985585	0.99559
Gohir.A01G044600.1	1.048	1.27001	1.12096	-0.880114	-1.36171	-1.19714		Gohir.D02G124850.1	-0.99821	-0.99821	-0.99821	1.98583	2.00701	-0.99821
Gohir.A10G056200.2	0.956794	1.11773	0.867619	-0.704178	-1.15096	-1.08701		Gohir.A05G112101.1	-0.472342	-0.618644	-0.588828	0.32504	0.489347	0.865427
Gohir.D11G328600.1	1.9338	0.76424	0.337746	-0.916769	-1.05951	-1.05951		Gohir.A05G096000.1	-0.433029	-0.513269	-0.496605	0.482211	0.375545	0.585148
Gohir.D07G012800.1	1.4679	0.745778	0.487667	-0.538613	-1.26806	-0.894679		Gohir.A09G228700.1	-0.500071	-0.559953	-0.544426	0.746016	0.441997	0.416438
Gohir.D11G322200.1	2.41442	1.60727	1.54265	-1.69651	-2.10185	-1.76598		Gohir.D12G160100.1	-0.746596	-0.800011	-0.438031	0.530122	0.628567	0.82595
Gohir.D06G011100.1	0.582517	1.27582	0.767932	-0.931789	-0.816722	-0.877761		Gohir.D12G225100.1	-0.375068	-1.10391	-0.756594	0.958067	0.608646	0.668861
Gohir.A05G307100.1	1.3635	0.549923	0.70596	-0.794187	-0.794187	-1.03101		Gohir.A07G231000.1	-0.539491	-1.12901	-1.0401	0.98731	0.732084	0.989203
Gohir.A07G101300.2	1.79473	0.237566	0.302175	-0.674324	-0.830073	-0.830073		Gohir.D10G099700.1	-0.574518	-2.37583	-2.2128	1.64611	1.7572	1.75984
Gohir.D04G033900.1	0.379704	1.28709	1.061	-0.774664	-0.956589	-0.996544		Gohir.A11G023500.1	-0.92356	-1.42459	-0.752773	1.20219	0.901126	0.997605
Gohir.D11G081450.1	0.548083	0.300119	0.357972	-0.420311	-0.372482	-0.41338		Gohir.A09G074100.1	-0.445115	-0.236603	-0.560485	0.422657	0.373065	0.446481
Gohir.A05G116800.1	0.02713	1.48419	1.29104	-1.06101	-0.887772	-0.853588		Gohir.A08G244300.1	-0.557247	-1.25844	-1.23211	1.19041	0.994935	0.862447
Gohir.D06G217200.1	0.627334	0.942615	0.770451	-0.666413	-0.916162	-0.757825		Gohir.D09G093700.1	-0.592923	-0.348036	-0.592923	0.339894	0.387468	0.806521
Gohir.D07G188000.1	1.54513	0.248431	0.57256	-0.906671	-0.552783	-0.906671		Gohir.A09G213648.1	-0.531705	-1.13991	-0.82795	0.642257	0.826651	1.03066
Gohir.A11G026000.1	0.570168	1.83022	1.59319	-1.09704	-1.53699	-1.35955		Gohir.D10G027300.1	-0.95443	-1.7775	-1.92675	0.873368	1.89025	1.89506
Gohir.D12G061800.1	1.15515	1.14495	0.984621	-1.55638	-0.983332	-0.745003		Gohir.D12G231900.1	-0.854167	-0.422866	-0.509691	0.296113	0.680183	0.810428
Gohir.A05G056800.1	0.891015	1.35404	1.41156	-1.25053	-1.27529	-1.13079		Gohir.A10G009400.1	-0.563819	-0.790523	-0.741888	0.997997	0.728532	0.369701
Gohir.D01G122100.1	1.78177	0.847215	0.940457	-1.18982	-1.18982	-1.18982		Gohir.A11G267400.1	-0.712281	-1.16405	-1.55502	0.845317	1.36003	1.22601
Gohir.D08G144700.1	-0.125421	0.96649	0.777991	-0.451781	-0.635645	-0.531634		Gohir.A07G132800.1	-0.760059	-0.957924	-0.696093	0.936602	0.676669	0.800805
Gohir.D09G236400.1	1.89496	1.40251	0.88599	-1.24049	-1.45586	-1.48712		Gohir.D02G185600.2	-0.872497	-1.23077	-1.22446	1.46299	1.06563	0.799116
Gohir.D10G113600.2	0.980816	0.973294	0.948862	-1.03875	-0.785742	-1.07848		Gohir.D03G110900.1	-1.20886	-1.76258	-0.847953	1.61167	0.919248	1.28847
Gohir.D10G238316.1	0.653958	1.26984	1.48747	-1.2271	-1.03748	-1.14669		Gohir.A07G059700.1	-0.723901	-0.722998	-0.694375	0.510451	0.5758	1.05502
Gohir.D11G289800.1	0.302141	0.638113	0.715142	-0.233993	-0.625868	-0.795535		Gohir.A05G073200.1	-0.604546	-0.811939	-0.43913	0.294976	0.736665	0.823974
Gohir.D11G137432.1	0.280988	1.37664	1.91141	-1.62552	-0.996977	-0.946544		Gohir.D12G259100.1	-0.664952	-0.738526	-0.761846	-0.185156	1.31847	1.03201
Gohir.D05G061600.1	-0.19348	1.61136	1.62074	-0.764725	-0.932125	-1.34177		Gohir.A10G207300.4	-0.429752	-0.507265	-0.627617	0.388879	0.658673	0.517082
Gohir.D11G039000.1	0.145534	0.603977	0.977611	-0.430585	-0.55062	-0.745917		Gohir.D03G088500.1	-0.301768	-1.02202	-1.03343	0.662877	0.735474	0.958857
Gohir.D07G157400.1	1.33205	1.17401	0.909633	-1.37363	-1.09322	-0.948835		Gohir.D12G154900.1	-1.02549	-1.14227	-1.23167	0.937267	1.08054	1.38162
Gohir.D10G028200.1	2.03829	0.567594	0.601464	-1.93849	-0.735742	-0.533112		Gohir.A08G041000.1	-0.511609	-0.491734	-0.764491	0.447333	0.520772	0.799729
Gohir.D11G222600.1	0.576812	0.997416	0.471797	-0.682008	-0.682008	-0.682008		Gohir.D09G182300.1	-0.544412	-0.544412	-0.544412	0.237997	0.78844	0.606798
Gohir.A11G281700.1	1.1053	1.17901	0.444148	-1.10074	-0.511918	-1.11581		Gohir.A02G156500.1	-0.712666	-1.51073	-1.65715	1.11175	1.39365	1.37515
Gohir.D01G157400.1	1.64226	1.01496	0.434464	-0.675864	-1.2145	-1.20133		Gohir.A01G164100.1	-0.753642	-0.759611	-0.794727	0.420644	1.29238	0.594961
Gohir.D02G140900.1	0.603325	0.381429	0.772985	-0.591707	-0.561988	-0.604044		Gohir.D01G077850.1	-0.411419	-0.797973	-0.796647	0.239365	0.901752	0.864922
Gohir.A01G215300.1	3.20396	1.32434	1.49817	-1.96819	-1.86357	-2.1947		Gohir.D11G010500.1	-0.64664	-1.28456	-1.08347	1.05769	0.974026	0.982959
Gohir.D03G023700.1	0.932751	0.560672	1.00983	-0.91137	-0.851937	-0.739948		Gohir.D04G060150.1	-0.419867	-2.3949	-1.13122	1.79828	0.966665	1.18104
Gohir.A11G177500.1	0.878987	0.428162	0.606364	-0.848627	-0.738077	-0.326809		Gohir.D02G199300.1	-0.460327	-1.54117	-1.37515	0.665213	1.36344	1.34799
Gohir.A02G157200.1	0.510646	1.70851	1.08265	-1.01684	-1.05256	-1.23241		Gohir.A03G053300.1	-0.806636	-1.66412	-0.826481	0.668241	1.32758	1.30142
Gohir.D05G102900.1	0.499446	1.72542	1.39548	-1.40217	-1.02289	-1.19528		Gohir.D11G081000.1	-1.23807	-1.41204	-1.01261	0.821588	1.40791	1.43322
Gohir.D05G237901.1	1.55117	1.39412	1.41755	-1.49618	-1.41794	-1.44873		Gohir.A13G088845.1	-0.34327	-0.596654	-0.596654	0.853831	0.636007	0.0467403
Gohir.D12G152400.2	0.150097	1.7317	1.29745	-0.697351	-1.25055	-1.23135		Gohir.D05G154900.1	-0.67868	-1.5018	-0.734055	0.817746	0.956007	1.14078
Gohir.D12G165000.1	0.618152	1.12094	1.34783	-0.85381	-1.07048	-1.16263		Gohir.A07G103400.1	-0.771228	-1.43662	-0.90855	0.486718	0.976973	1.65271
Gohir.A05G208700.1	0.672088	2.05372	2.07648	-1.08326	-1.51807	-2.20097		Gohir.A02G083501.1	-0.728067	-1.51866	-0.594107	0.830704	0.774143	1.23598
Gohir.A04G110500.2	0.481731	0.597006	1.24786	-0.907739	-0.464334	-0.954523		Gohir.A08G025100.1	-0.74494	-1.78894	-1.4078	0.994954	1.4186	1.52812
Gohir.A01G139000.1	1.30324	0.666763	0.242157	-0.688237	-0.760588	-0.763339		Gohir.D04G106100.1	-0.490918	-1.03982	-0.792606	0.897377	0.744681	0.68129
Gohir.D02G076900.1	0.734078	0.675723	1.21823	-1.0934	-0.743376	-0.791253		Gohir.D11G254400.1	-0.598594	-1.82309	-2.05465	1.72198	1.53577	1.21858
Gohir.A05G359500.1	1.99171	1.93277	1.43454	-1.64469	-1.76612	-1.94822		Gohir.A12G023200.1	-0.594971	-1.09253	-0.859961	0.482517	1.0645	1.00045
Gohir.A13G209000.1	1.24815	0.586568	0.823038	-1.04553	-0.893271	-0.71895		Gohir.D09G191000.1	-1.07868	-0.966242	-1.05976	1.40074	0.903213	0.800732
Gohir.A06G084500.1	0.623182	0.814029	0.548139	-0.57065	-0.825671	-0.589028		Gohir.A01G070400.1	-0.32773	-0.48994	-0.48994	0.463883	0.497744	0.345984
Gohir.A08G189900.1	1.8288	0.416294	0.671562	-0.973411	-1.00089	-0.942354		Gohir.A11G042500.1	-0.381067	-0.769444	-0.860298	0.686658	0.638974	0.685177
Gohir.D08G172800.1	0.257509	1.16027	0.846871	-0.601223	-0.731119	-0.932306		Gohir.D12G152100.2	-0.391311	-0.611236	-0.581029	0.324301	0.554701	0.704573
Gohir.A10G049400.1	0.927431	0.975247	1.06711	-1.69505	-0.352771	-0.92197		Gohir.A11G274700.1	-0.880689	-1.56527	-1.34657	0.949212	1.49689	1.34643
Gohir.D03G156100.1	1.32295	1.78435	1.88143	-1.70779	-1.81834	-1.4626		Gohir.A08G078250.1	-0.316182	-0.843121	-0.711125	0.295266	0.675927	0.899234
Gohir.A05G408600.2	0.53434	0.452796	0.494144	-0.445382	-0.387341	-0.648557		Gohir.A02G109800.1	-0.870771	-1.38269	-1.36685	1.16803	1.03674	1.41554
Gohir.A11G001300.1	0.830696	0.478349	0.548739	-0.619261	-0.619261	-0.619261		Gohir.A11G057300.1	-1.27859	-1.89306	-0.669024	0.778002	1.63338	1.4293
Gohir.D12G088200.1	-0.121827	1.34869	1.63541	-1.25167	-0.952855	-0.657737		Gohir.D11G007500.1	-0.356621	-0.946949	-0.764262	0.515974	0.816322	0.735536
Gohir.A07G044200.2	0.359927	1.56871	1.19016	-1.17229	-0.441499	-1.505		Gohir.A02G156900.2	-0.600071	-0.996686	-0.992117	0.919404	0.76163	0.907839
Gohir.A01G088733.1	0.440184	0.384457	0.751882	-0.525508	-0.525508	-0.525508		Gohir.D01G090000.1	-0.640422	-1.50005	-0.892145	1.13407	0.941796	0.956748
Gohir.A04G087200.2	-0.131281	1.51731	1.43538	-1.09969	-0.897545	-0.824165		Gohir.A03G046700.1	-0.768906	-0.785095	-0.767668	0.639771	0.962725	0.719172
Gohir.D03G085266.1	-0.213865	1.49935	1.42036	-1.26298	-0.623287	-0.819586		Gohir.D09G028000.1	-0.656255	-1.52156	-1.34953	1.34712	1.19121	0.98902
Gohir.D12G263866.1	0.688365	0.631372	0.696326	-0.628145	-0.751797	-0.63612		Gohir.D07G161900.1	-0.56608	-1.63371	-0.900279	0.357967	1.33901	1.40309
Gohir.A12G022300.3	0.853332	0.571005	0.240261	-0.510692	-0.576953	-0.576953		Gohir.D10G210100.1	-0.516389	-2.18059	-2.52581	1.18665	2.08747	1.94868
Gohir.D08G208300.1	1.04951	1.29706	0.532759	-0.73072	-1.09329	-1.05532		Gohir.D01G163900.1	-0.35474	-1.25098	-0.990409	0.958329	1.07347	0.56433
Gohir.D11G147000.1	0.331353	1.26925	1.44923	-1.01874	-1.01351	-1.01759		Gohir.A06G001300.1	-1.22103	-2.05992	-1.1675	1.26471	1.53478	1.64897
Gohir.D01G103400.1	0.870948	0.741934	0.165837	-0.565939	-0.572429	-0.640349		Gohir.A11G043700.1	-0.456138	-0.441735	-0.576852	0.408914	0.665931	0.399879
Gohir.A03G034300.1	0.252168	1.26684	1.56719	-1.19587	-0.997311	-0.89302		Gohir.A01G204300.1	-0.333596	-0.909606	-0.77864	0.528936	0.891155	0.601751
Gohir.A07G091700.2	0.653098	1.42045	1.62684	-1.10282	-1.38137	-1.2162		Gohir.D12G058800.1	-0.891027	-0.437494	-0.936413	0.609262	0.527083	1.12859
Gohir.D05G225500.1	0.340403	1.71414	1.38826	-0.979245	-1.33812	-1.12545		Gohir.A02G025700.1	-0.415335	-0.774732	-0.74541	0.149823	0.885748	0.899907
Gohir.A02G080400.1	1.18087	1.25161	0.59384	-0.89834	-1.1599	-0.968085		Gohir.D04G067600.1	-0.271184	-0.672814	-0.451246	0.521273	0.322128	0.551844
Gohir.D02G019601.1	1.79528	0.343911	0.2132	-0.670693	-0.871992	-0.809707		Gohir.A12G261650.1	-0.82096	-1.96049	-1.93039	1.31141	1.69697	1.70346
Gohir.D10G081900.1	-0.00433469	0.929182	0.878308	-0.618768	-0.473412	-0.710976		Gohir.A07G093100.1	-0.769907	-0.705106	-1.04633	0.619053	1.17589	0.7264
Gohir.A02G161200.1	0.473643	0.391372	0.334514	-0.34743	-0.488499	-0.363601		Gohir.A09G143600.1	-0.99194	-0.945978	-0.527993	0.442635	1.04341	0.979866
Gohir.D01G058000.1	1.99465	0.457902	0.539581	-0.911997	-1.03874	-1.04139		Gohir.D06G041600.1	-0.884913	-1.79796	-0.795818	1.0067	1.19108	1.28091
Gohir.A08G171100.1	0.848844	1.40358	0.815205	-0.661091	-1.02326	-1.38328		Gohir.A12G177800.1	-0.56426	-0.766594	-0.872272	0.992459	0.944123	0.266543
Gohir.A10G233000.1	1.69222	1.34271	0.757746	-1.14413	-1.32427	-1.32427		Gohir.D06G053851.1	-1.81289	-2.02559	-1.93678	1.08668	2.66657	2.022
Gohir.D02G178200.2	0.528212	0.272657	0.804808	-0.418092	-0.618542	-0.569043		Gohir.D13G019500.1	-1.03792	-1.73658	-0.790226	0.381777	1.55987	1.62308
Gohir.D05G008400.1	1.75311	1.30814	1.25226	-1.14289	-1.64309	-1.52753		Gohir.D12G116400.1	-0.844645	-0.745576	-0.716495	0.606925	1.25551	0.444279
Gohir.A11G247700.1	2.3103	1.27272	0.838586	-1.2521	-1.57029	-1.59921		Gohir.D11G158100.1	-1.50284	-1.80792	-2.38564	1.67893	1.71531	2.30216
Gohir.D01G070300.1	0.08751	1.23879	0.866325	-0.683455	-0.811505	-0.697663		Gohir.D10G153600.1	-0.450331	-0.703715	-0.703715	0.907457	0.600212	0.350091
Gohir.A02G137601.1	1.50704	1.88762	1.70044	-1.69965	-1.56621	-1.82924		Gohir.A03G078600.1	-1.00545	-2.12473	-2.39343	1.27978	2.13298	2.11084
Gohir.D05G228000.1	0.927224	0.948617	1.02933	-1.02461	-1.05396	-0.826602		Gohir.A03G051100.1	-0.383909	-1.1984	-0.978158	0.498952	0.653	1.40852
Gohir.D10G063600.1	0.813644	0.418106	0.273031	-0.562494	-0.63359	-0.308696		Gohir.D07G145000.2	-0.727347	-0.793089	-0.861066	0.183	1.37002	0.828486
Gohir.A13G197900.1	0.333629	0.604948	0.417059	-0.427767	-0.479594	-0.448275		Gohir.D12G088000.1	-0.228458	-1.065	-1.11674	0.574243	0.803705	1.03225
Gohir.D08G114000.1	0.801408	0.344339	0.332484	-0.718397	-0.421845	-0.337989		Gohir.D07G017200.1	-0.817814	-1.23093	-1.4898	0.842851	1.41788	1.27782
Gohir.A09G240166.1	1.02158	1.31592	0.981835	-1.20032	-0.972286	-1.14673		Gohir.D13G003500.1	-0.299188	-1.69451	-1.82179	1.21134	1.24098	1.36317
Gohir.D11G312452.1	1.09614	0.658895	0.428248	-0.961222	-0.584142	-0.637923		Gohir.A07G205900.1	-0.430291	-0.801013	-0.801013	0.287807	0.554567	1.18994
Gohir.D10G238300.1	1.47292	1.10598	1.34038	-1.45423	-1.21108	-1.25397		Gohir.D01G153700.1	-0.439796	-0.766101	-0.777751	0.700696	0.72429	0.558661
Gohir.D07G009500.1	0.699363	0.92477	0.535019	-0.885599	-0.713605	-0.559948		Gohir.D09G005700.1	-0.569631	-1.44338	-1.7121	1.08919	1.41699	1.21893
Gohir.A10G101770.1	0.985295	2.24147	1.68131	-1.97815	-1.72049	-1.20943		Gohir.D05G012400.1	-0.695436	-1.50913	-0.736767	1.08535	0.874071	0.98192
Gohir.D03G143900.1	1.31372	1.19664	1.22482	-1.30874	-1.19905	-1.2274		Gohir.D05G177000.1	-0.920242	-0.920242	-0.920242	0.959463	1.07904	0.722228
Gohir.A03G161000.1	-0.204756	1.21782	1.20991	-0.549606	-0.923504	-0.74987		Gohir.A06G163300.1	-0.394019	-0.541725	-0.57016	0.278596	0.591383	0.635926
Gohir.D01G196000.1	0.811041	0.903369	0.133617	-0.59033	-0.829117	-0.428579		Gohir.D06G018400.1	-1.12261	-0.873012	-1.01762	0.361643	1.31571	1.33589
Gohir.D07G044100.1	1.03349	0.614554	0.187328	-0.453709	-0.732897	-0.648764		Gohir.A08G129000.1	-0.601267	-1.97992	-2.49475	1.44071	1.92236	1.71287
Gohir.A02G148600.1	1.10942	1.21158	1.79192	-1.62088	-0.989451	-1.5026		Gohir.A04G067900.1	-0.74031	-2.19691	-1.14497	1.24089	1.4345	1.40681
Gohir.D12G007400.1	0.180565	1.80639	1.54967	-0.724075	-1.45754	-1.35501		Gohir.A08G039900.1	-1.51386	-1.84185	-0.813463	0.347507	2.20749	1.61418
Gohir.A01G103200.1	1.90059	1.72048	1.74056	-1.72344	-2.01955	-1.61864		Gohir.D04G169900.1	-0.467333	-0.497364	-0.412656	0.432689	0.443926	0.500738
Gohir.D12G252400.1	0.353915	1.41597	1.43474	-1.39292	-0.87639	-0.93532		Gohir.D13G043300.5	-1.09156	-2.48158	-1.92896	1.65782	1.91759	1.92669
Gohir.A05G403900.1	0.577926	1.76745	1.84085	-1.31469	-1.3435	-1.52804		Gohir.D01G058700.1	-0.357501	-0.70071	-0.901951	0.226686	0.842683	0.890794
Gohir.D12G253800.2	-0.0405208	1.03908	1.15979	-0.560342	-0.887087	-0.710921		Gohir.A03G006260.1	-0.474674	-0.329143	-0.580548	0.267076	0.432842	0.684447
Gohir.D11G295500.3	0.337592	0.704682	1.30085	-0.748058	-0.782824	-0.812243		Gohir.D08G247950.1	-0.517074	-0.615626	-0.847059	0.79495	0.439231	0.745578
Gohir.D11G194600.1	0.854145	1.2944	0.287379	-0.98886	-0.6878	-0.759267		Gohir.D07G120800.1	-0.402347	-1.70268	-2.19881	1.086	1.65813	1.55971
Gohir.A10G091100.1	0.236289	0.843487	0.709423	-0.479654	-0.580143	-0.729402		Gohir.A07G095600.1	-1.18087	-1.25472	-0.547298	0.502315	1.21637	1.26421
Gohir.A02G132800.1	2.51791	1.10039	0.819082	-0.984781	-1.45156	-2.00104		Gohir.D02G186600.2	-0.258315	-0.699656	-0.531945	0.75482	0.318151	0.416944
Gohir.D11G014900.2	0.261838	1.53838	1.55237	-1.28737	-1.15368	-0.911544		Gohir.D02G161740.1	-0.653323	-0.449512	-0.764777	0.608465	0.476487	0.782661
Gohir.A04G004600.1	0.979012	0.988324	0.591656	-0.779839	-0.939488	-0.839665		Gohir.D05G197600.1	-1.2417	-1.12109	-0.448386	1.00882	0.937802	0.864553
Gohir.A02G100200.1	0.626266	1.59782	1.23027	-1.03475	-0.885131	-1.53447		Gohir.D06G076050.1	-0.505115	-0.8026	-0.366438	0.58145	0.0958018	0.996902
Gohir.D05G229575.1	0.545359	1.16349	1.19193	-0.802003	-0.973275	-1.1255		Gohir.D04G148666.1	-0.752879	-0.579798	-1.35885	0.874427	0.954688	0.862411
Gohir.A05G187900.1	3.01896	0.540376	0.644583	-1.56562	-1.26591	-1.3724		Gohir.A01G164300.1	-0.398152	-2.02113	-1.53514	1.26243	1.42507	1.26692
Gohir.A07G161800.1	1.19081	1.05766	1.31883	-1.01508	-1.11566	-1.43656		Gohir.D05G369500.5	-1.15999	-1.69505	-1.27067	1.20006	1.37293	1.55272
Gohir.A13G090700.1	0.792993	0.214342	0.709896	-0.478476	-0.710935	-0.52782		Gohir.D04G014000.3	-0.350199	-0.472297	-0.592649	0.636939	0.558561	0.219644
Gohir.D05G377400.1	0.144795	1.71974	1.70676	-1.31302	-1.54493	-0.713342		Gohir.D13G115000.1	-0.422478	-1.69108	-1.3646	1.03656	1.37606	1.06553
Gohir.A05G187300.1	2.02771	0.509439	0.469169	-0.751048	-1.15122	-1.10405		Gohir.A07G228500.2	-0.719618	-1.02126	-0.896675	0.85748	1.02711	0.752964
Gohir.A10G065200.1	1.35062	1.40197	0.954319	-0.33023	-1.72154	-1.65514		Gohir.A02G160700.1	-0.440243	-0.466019	-0.464651	0.419359	0.348748	0.602806
Gohir.D13G217600.1	1.51566	0.457728	0.72882	-1.05417	-0.959307	-0.688727		Gohir.A10G115600.1	-0.51474	-1.03019	-0.742001	0.0118565	1.10992	1.16515
Gohir.D05G225800.1	1.32058	1.1946	0.955357	-0.80601	-1.2487	-1.41583		Gohir.D01G062500.1	-2.10682	-1.92623	-2.36709	1.244	2.58442	2.57172
Gohir.D04G188100.1	0.702649	0.345985	0.848485	-0.735052	-0.26189	-0.900176		Gohir.A05G105100.1	-0.538933	-0.549729	-0.640583	0.571053	0.622452	0.53574
Gohir.A03G130100.1	0.69537	0.392626	0.796549	-0.546495	-0.493446	-0.844605		Gohir.1Z049542.1	-0.349845	-0.669835	-0.5517	0.889543	0.242486	0.439351
Gohir.A03G155100.1	0.966796	0.695538	0.530339	-0.326315	-1.00117	-0.865193		Gohir.D03G113300.1	-0.930923	-1.57915	-1.60789	1.01198	1.58511	1.52089
Gohir.A07G225000.1	1.61175	1.55485	1.32859	-1.07812	-1.49575	-1.92132		Gohir.A03G100700.1	-0.612198	-1.4486	-2.27827	1.91807	1.2525	1.16849
Gohir.A13G058500.1	1.15385	0.322464	0.956979	-0.811099	-0.811099	-0.811099		Gohir.A07G154900.2	-1.08296	-1.51234	-1.12437	0.392764	1.45512	1.87178
Gohir.D07G167800.1	0.720495	1.14711	0.982929	-0.733057	-1.16672	-0.95076		Gohir.D13G121500.1	-0.487238	-2.52698	-3.71669	2.53499	2.37953	1.81639
Gohir.D07G005400.1	1.13569	0.828411	1.9006	-1.82714	-0.760388	-1.27717		Gohir.A13G058900.1	-0.60276	-0.569532	-0.280025	0.647784	0.332621	0.471913
Gohir.A08G002700.2	-0.0602094	0.901659	0.860707	-0.44899	-0.568995	-0.684172		Gohir.A07G033200.1	-0.270924	-1.77694	-1.98144	1.68647	1.18613	1.1567
Gohir.A04G139200.1	2.98286	1.67332	1.08068	-1.7654	-2.0377	-1.93376		Gohir.A10G068500.3	-0.44965	-0.736531	-0.360241	0.231375	0.58482	0.730227
Gohir.A08G069700.1	0.576684	0.603507	1.22615	-1.10973	-0.629058	-0.66755		Gohir.D02G169600.1	-0.8498	-2.27175	-1.4614	2.16039	1.16735	1.25521
Gohir.D05G016300.1	1.52237	1.35689	1.66806	-1.32512	-1.43658	-1.78562		Gohir.D11G077200.3	-0.427625	-0.860142	-0.80162	0.750689	0.672107	0.66659
Gohir.D01G081100.1	0.722004	1.66949	0.816521	-1.01615	-0.969454	-1.22242		Gohir.D08G137300.1	-0.252538	-0.643226	-0.888264	0.734744	0.330889	0.718394
Gohir.D10G176000.1	4.26671	1.06507	1.08653	-2.77001	-2.35218	-1.29612		Gohir.A03G038100.1	-0.654975	-0.856277	-0.853227	0.883434	0.789471	0.691573
Gohir.A01G172800.1	1.61788	1.41218	1.07662	-1.38825	-1.49535	-1.22308		Gohir.A01G003400.1	-0.944852	-0.49173	-0.451205	0.369554	0.946567	0.571667
Gohir.A12G082165.1	0.172053	1.12409	1.37388	-0.63747	-0.792288	-1.24026		Gohir.D11G041700.1	-0.713402	-0.925608	-0.840145	0.921144	0.754008	0.804002
Gohir.D04G109200.1	1.03477	2.17265	1.60038	-1.17717	-1.75763	-1.873		Gohir.D08G100200.1	-0.550549	-0.45759	-0.815986	0.804131	0.410522	0.609473
Gohir.D03G038700.1	0.88518	0.641613	0.224453	-0.691587	-0.621646	-0.438013		Gohir.A05G164700.1	-0.427458	-0.905107	-0.590956	1.14234	0.432251	0.348931
Gohir.D13G175100.1	1.46668	1.46549	1.22889	-1.47364	-1.46532	-1.22211		Gohir.A05G001400.1	-0.89515	-1.76973	-1.84787	1.4425	1.54978	1.52046
Gohir.D05G277400.1	-0.0513487	1.88454	1.22709	-0.656817	-1.47096	-0.932506		Gohir.D04G167100.1	-1.25853	-1.25853	-1.25853	0.88192	1.54387	1.3498
Gohir.A05G208000.1	1.20714	0.60631	-0.0176088	-0.62391	-0.553975	-0.617951		Gohir.D06G083200.1	-0.406531	-0.597502	-0.817664	0.827127	0.595422	0.399147
Gohir.A09G167200.1	1.78252	1.04183	1.00348	-1.93855	-0.770851	-1.11843		Gohir.D11G007000.1	-0.579047	-0.983462	-0.954019	0.775191	0.966483	0.774853
Gohir.A04G111400.1	0.729157	1.16642	0.963638	-0.771058	-1.00561	-1.08254		Gohir.A13G096500.1	-0.653638	-0.653638	-0.653638	-0.0307081	0.767518	1.22411
Gohir.D05G047100.1	0.556537	0.806192	0.356173	-0.557495	-0.60659	-0.554816		Gohir.D05G205900.3	-0.502502	-0.589531	-0.820963	0.509595	0.144729	1.25867
Gohir.D05G087300.2	1.2232	0.469498	0.759796	-0.870442	-0.824639	-0.757417		Gohir.D07G052900.2	-0.916954	-1.67216	-1.98306	1.53893	1.49596	1.53729
Gohir.D07G213500.1	0.854194	1.98005	1.58052	-0.862131	-1.76514	-1.78749		Gohir.D12G006700.2	-0.856258	-0.572929	-0.856258	0.390454	0.963818	0.931174
Gohir.D13G169600.1	2.34494	1.36041	0.526915	-1.52522	-1.27872	-1.42834		Gohir.D06G179800.1	-0.375198	-0.489519	-0.514785	0.0962786	0.470483	0.81274
Gohir.D04G182200.2	1.83663	0.516091	0.114031	-0.913123	-0.640502	-0.913123		Gohir.D02G034700.1	-0.944916	-1.51635	-0.727247	1.00796	1.27171	0.90884
Gohir.A13G017700.2	0.20326	1.33774	1.15417	-1.02782	-0.866022	-0.801321		Gohir.A02G080900.1	-2.00466	-1.66826	-0.805121	0.459379	2.05539	1.96327
Gohir.A04G084400.2	0.862395	0.445494	0.720569	-0.662151	-0.649062	-0.717245		Gohir.A04G077700.1	-0.613488	-1.21946	-0.843166	0.863927	0.849902	0.962282
Gohir.D05G035500.1	0.424534	1.20268	1.67789	-1.50825	-0.988623	-0.808218		Gohir.D05G232900.1	-0.432499	-0.643505	-0.71938	0.101922	0.891792	0.801671
Gohir.A04G070500.1	1.25548	1.67595	1.41784	-1.45201	-1.49058	-1.40669		Gohir.A10G190200.2	-0.666811	-1.44972	-1.07412	0.963397	1.14333	1.08391
Gohir.A05G296800.1	0.497782	1.42302	1.12751	-0.804	-1.16002	-1.08429		Gohir.A02G064000.1	-0.927632	-0.690197	-0.623502	1.09948	0.303949	0.837903
Gohir.A01G214200.1	0.0713695	1.01449	1.0813	-0.689194	-0.736359	-0.741599		Gohir.A12G184100.1	-0.44276	-0.60497	-0.369856	0.909026	0.0328721	0.475688
Gohir.D11G331300.1	0.930959	0.413288	0.184835	-0.38546	-0.545745	-0.597876		Gohir.D12G003500.1	-0.905893	-1.58698	-1.56898	0.232911	1.95562	1.87333
Gohir.A01G111100.1	0.106959	1.57088	1.38703	-1.01729	-1.0096	-1.03799		Gohir.A03G062500.1	-0.431807	-1.31845	-1.12324	1.03462	0.921869	0.917003
Gohir.A06G005100.1	1.7632	1.35535	0.705913	-0.334729	-1.71187	-1.77787		Gohir.D11G123500.1	-0.743649	-1.31476	-0.700407	1.17713	0.818653	0.763034
Gohir.A07G013000.1	1.21006	1.01449	0.520392	-0.789494	-1.03683	-0.918617		Gohir.A13G193300.1	-0.818362	-1.1055	-1.97845	0.977514	1.44609	1.4787
Gohir.A01G174100.2	1.60667	0.827909	0.796072	-1.01928	-0.939418	-1.27196		Gohir.A05G369300.1	-0.839346	-2.41289	-0.642049	1.18888	1.20493	1.50047
Gohir.A02G152500.2	0.50053	1.71036	1.21657	-0.965387	-1.18159	-1.28048		Gohir.A12G169200.1	-0.368721	-1.16521	-1.39887	1.0742	0.909125	0.949472
Gohir.D04G125600.1	0.147438	1.13543	1.10767	-0.769834	-0.854477	-0.766225		Gohir.A13G201100.1	-0.792665	-2.3931	-1.39669	1.73362	1.52802	1.32081
Gohir.A12G082000.2	0.0847803	0.811778	1.633	-0.743848	-0.922135	-0.863574		Gohir.A11G259600.1	-1.02832	-1.79461	-2.09918	0.877765	2.03431	2.01004
Gohir.D08G053700.2	0.450723	0.533263	0.179589	-0.420153	-0.338469	-0.404953		Gohir.D09G094900.1	-0.936627	-2.10787	-1.92811	1.34989	1.73898	1.88374
Gohir.D12G057000.2	0.470443	0.836863	0.947545	-1.05964	-0.843701	-0.351512		Gohir.D11G221900.1	-0.636068	-1.22487	-0.848582	0.298689	1.30744	1.10339
Gohir.D06G154700.1	0.772332	1.36993	1.15594	-0.950124	-1.19927	-1.14881		Gohir.D10G065700.1	-0.424149	-2.41915	-1.02577	1.32172	1.54523	1.00213
Gohir.A07G023400.1	1.1806	1.24786	1.16882	-0.88799	-1.47474	-1.23455		Gohir.A10G212300.1	-0.597221	-0.937922	-0.921419	0.633358	1.2419	0.581304
Gohir.D01G035500.1	0.734176	1.30666	1.04567	-0.861369	-1.16635	-1.05879		Gohir.A06G183400.1	-0.505002	-0.939258	-0.876297	1.0146	0.603549	0.702413
Gohir.D11G159600.1	1.68923	0.864582	0.453757	-1.00252	-1.00252	-1.00252		Gohir.D09G121100.1	-0.719939	-1.33948	-1.69378	1.3568	1.12529	1.2711
Gohir.D09G093100.1	0.897942	0.863338	0.784385	-0.926343	-0.835847	-0.783474		Gohir.A12G221200.1	-0.794698	-1.27925	-1.42052	1.30221	1.13048	1.06177
Gohir.D08G229750.1	3.2586	3.10601	2.24472	-2.86978	-2.86978	-2.86978		Gohir.A02G046200.2	-0.855779	-0.670313	-0.701798	0.485395	0.677218	1.06528
Gohir.D09G047301.1	0.527446	1.22494	1.20451	-0.777961	-1.11469	-1.06425		Gohir.A12G055000.1	-0.663178	-0.518587	-0.700625	0.281379	0.723193	0.877819
Gohir.D12G086300.1	0.544056	0.682903	0.735182	-0.610766	-0.76971	-0.581667		Gohir.A04G052400.1	-0.291698	-0.510295	-0.557135	0.479192	0.445027	0.434908
Gohir.D02G147000.2	1.53421	0.596695	0.635526	-0.799144	-0.952323	-1.01496		Gohir.D07G199000.1	-0.837171	-0.914414	-0.852292	1.16249	0.868833	0.572558
Gohir.D05G330700.1	0.465882	1.55193	1.43517	-0.984807	-1.1475	-1.32067		Gohir.A07G015200.2	-0.433411	-0.459488	-0.60123	0.671135	0.504016	0.318978
Gohir.D05G136400.1	1.11006	0.781617	0.389565	-0.70997	-0.743601	-0.827666		Gohir.D13G148000.1	-0.446347	-0.737422	-0.721582	1.13934	0.213989	0.552025
Gohir.A07G059000.1	0.379023	1.16129	1.13414	-0.746791	-1.03084	-0.896816		Gohir.A04G097700.1	-0.638673	-0.832248	-0.943081	0.681084	0.916701	0.816216
Gohir.A01G203000.1	0.573385	1.37205	1.13258	-0.499462	-1.23151	-1.34705		Gohir.D06G157300.1	-0.484577	-0.61155	-0.61155	0.570506	0.494128	0.643044
Gohir.D02G038200.1	0.759257	0.191357	0.492115	-0.412899	-0.626943	-0.402887		Gohir.A08G136400.1	-0.749666	-1.72776	-1.61449	1.24101	1.36246	1.48845
Gohir.A13G120300.1	0.498178	1.28022	0.701996	-0.441607	-0.846054	-1.19273		Gohir.A04G125100.1	-0.481281	-0.910661	-0.808446	0.840846	0.73341	0.626132
Gohir.A13G069400.1	1.16101	0.452588	0.539784	-0.559903	-0.789346	-0.804129		Gohir.D02G166900.1	-0.653634	-0.710166	-0.403333	0.323625	0.757531	0.685977
Gohir.A05G261900.2	0.365283	0.802547	0.617104	-0.600557	-0.517559	-0.666818		Gohir.A02G119500.2	-0.303032	-0.725206	-0.709679	0.570731	0.394567	0.772619
Gohir.A10G075400.1	0.432168	1.76627	1.71415	-1.35474	-1.11584	-1.44201		Gohir.A05G372900.2	-0.958283	-1.15917	-0.821167	1.30742	0.781211	0.849985
Gohir.A01G204200.1	0.361392	0.974761	1.06375	-0.832224	-0.787595	-0.780081		Gohir.D12G172700.1	-0.511035	-0.98537	-0.984529	1.02008	0.63311	0.827739
Gohir.A04G017300.1	1.44107	0.948645	0.690491	-0.836096	-1.20501	-1.03909		Gohir.A10G212900.1	-0.353601	-1.4794	-1.62988	1.20951	1.219	1.03437
Gohir.D07G054300.1	1.76704	0.938377	0.605867	-0.978819	-0.933897	-1.39857		Gohir.D06G035150.1	-0.924768	-1.08705	-1.55826	1.36296	1.09811	1.10901
Gohir.A12G145500.1	2.04933	0.44352	0.0957522	-0.863909	-0.774451	-0.950245		Gohir.D05G207200.1	-0.848887	-1.43628	-0.995462	0.855225	1.15297	1.27243
Gohir.A02G120500.1	0.76092	0.572905	0.66776	-0.415531	-0.620539	-0.965515		Gohir.D09G174000.1	-0.597062	-0.723212	-0.766562	0.553452	0.720095	0.813289
Gohir.D06G152101.1	1.13838	0.412426	0.969873	-0.498909	-1.01088	-1.01088		Gohir.A02G156400.1	-0.269411	-1.1197	-1.40178	0.780112	1.05127	0.959519
Gohir.D10G205900.1	1.28799	1.35136	0.994433	-1.20059	-1.36879	-1.0644		Gohir.D08G123900.3	-0.322631	-0.48916	-0.609512	0.219119	0.635375	0.56681
Gohir.D10G010500.1	1.21634	0.29811	0.506245	-0.842708	-0.668307	-0.50968		Gohir.D05G272266.1	-0.665056	-0.665056	-0.665056	0.33061	0.946117	0.718441
Gohir.A06G153800.1	-0.0172137	1.23281	1.82616	-1.16469	-1.01234	-0.864717		Gohir.D13G092650.1	-1.9153	-0.762863	-1.08676	0.801911	1.26131	1.70171
Gohir.D08G208400.1	1.61451	0.89172	0.299499	-0.627889	-1.03339	-1.14446		Gohir.D03G011200.1	-1.06314	-1.92993	-1.87237	2.15537	1.36741	1.34267
Gohir.A05G007500.1	1.55444	2.43432	1.80818	-1.436	-2.18057	-2.18038		Gohir.A05G176400.1	-0.751403	-2.84678	-2.10573	1.28784	2.13068	2.28539
Gohir.A09G134901.1	0.853849	0.481783	0.8898	-0.870816	-0.750262	-0.604354		Gohir.A09G072400.1	-0.538716	-1.39599	-0.846815	0.889481	1.18198	0.710066
Gohir.A08G119500.1	1.61335	0.836496	0.330816	-0.803599	-0.822964	-1.1541		Gohir.A11G094500.1	-0.609046	-0.463516	-0.666422	0.541185	0.518003	0.679797
Gohir.A11G297700.1	1.0288	0.678326	0.674079	-0.674317	-0.852084	-0.854809		Gohir.A09G101340.1	-0.551844	-0.551844	-0.551844	0.510969	0.740349	0.404213
Gohir.D02G084200.1	-0.104435	1.61285	1.4165	-0.838607	-1.01395	-1.07236		Gohir.D05G084400.1	-0.668937	-1.06556	-1.07552	0.0738595	1.46032	1.27584
Gohir.D10G069500.1	0.511114	1.71116	1.33383	-0.805848	-1.34366	-1.4066		Gohir.D10G233600.1	-0.419647	-1.13422	-0.941397	0.84909	0.857821	0.788356
Gohir.A01G044400.1	3.54996	1.24855	1.28242	-2.0844	-2.06172	-1.93481		Gohir.A10G162100.1	-0.712829	-1.7387	-1.47379	1.10382	1.53231	1.2892
Gohir.A07G036300.1	1.64182	1.02528	0.927759	-0.966848	-1.28299	-1.34502		Gohir.D08G197660.1	-0.518846	-0.750279	-0.6286	0.407412	1.0579	0.432413
Gohir.D10G223100.1	0.30971	1.65447	1.26319	-0.875315	-1.25594	-1.09611		Gohir.A12G204500.4	-0.3779	-1.1534	-1.29183	1.00472	0.934239	0.884169
Gohir.D06G169900.1	1.22338	1.2284	0.965685	-0.899821	-1.55712	-0.960532		Gohir.D11G309500.1	-0.866763	-1.64966	-0.962602	1.41718	1.00945	1.0524
Gohir.D05G190900.1	0.96177	0.743849	0.755563	-0.890036	-0.826616	-0.74453		Gohir.D07G235600.1	-0.645593	-1.84626	-1.26315	1.16329	1.37348	1.21824
Gohir.A05G040800.2	1.38487	1.10046	1.36176	-1.20866	-0.993553	-1.64488		Gohir.A08G169200.1	-0.521179	-0.492858	-0.972851	0.856361	0.53694	0.593586
Gohir.D07G190200.1	0.751008	0.828938	0.689547	-0.721792	-0.739891	-0.80781		Gohir.D03G166200.1	-0.917184	-1.56504	-1.52451	0.5668	1.74078	1.69916
Gohir.D12G026600.3	-0.0146683	0.9801	1.1701	-0.65185	-0.487543	-0.996139		Gohir.A11G180662.1	-0.562736	-0.618403	-0.403652	0.737847	0.488229	0.358715
Gohir.A05G051200.1	0.544265	1.42062	1.46468	-1.18084	-1.04243	-1.20629		Gohir.A11G018700.1	-0.353884	-0.487151	-0.625222	0.481292	0.356552	0.628414
Gohir.D04G091400.2	1.18551	0.946004	0.720869	-0.485204	-1.26337	-1.10381		Gohir.D07G002800.1	-0.42814	-1.086	-1.12911	0.676881	1.08967	0.876694
Gohir.A03G163300.1	0.559661	1.32828	0.611462	-1.52075	-0.478954	-0.499701		Gohir.D01G004500.1	-0.892472	-1.82974	-1.42594	1.85799	1.26767	1.02249
Gohir.A05G226100.1	0.817459	0.982306	0.749093	-0.746507	-0.856931	-0.945419		Gohir.A10G193800.1	-0.601479	-2.09089	-2.36546	1.32743	1.90894	1.82146
Gohir.A12G187100.1	1.82323	1.33029	1.31784	-1.52544	-1.45129	-1.49463		Gohir.A03G092940.1	-0.491186	-1.23538	-1.45885	1.06542	1.2748	0.84519
Gohir.D09G159600.1	0.678381	1.74388	1.3686	-1.32507	-1.42374	-1.04205		Gohir.A10G046600.2	-0.448326	-1.16058	-1.31983	0.847962	1.00248	1.0783
Gohir.D11G326300.1	0.945134	0.687085	0.727198	-0.668332	-0.640914	-1.05017		Gohir.A11G042675.1	-0.736728	-1.68121	-1.59139	1.78679	1.06949	1.15305
Gohir.A12G267200.1	2.88924	1.6535	1.90845	-1.72626	-2.14114	-2.5838		Gohir.A04G133050.1	-0.666237	-0.666237	-0.666237	0.415784	1.30056	0.282364
Gohir.D04G185100.1	1.27673	1.28439	0.523512	-0.559185	-1.27589	-1.24955		Gohir.D01G156200.1	-0.310996	-1.69012	-1.36898	1.27265	1.16566	0.931787
Gohir.D11G299100.1	0.168244	1.20555	0.909017	-0.230888	-1.09887	-0.953051		Gohir.D04G115700.1	-0.28486	-1.0216	-1.02826	0.837597	0.773051	0.724075
Gohir.D05G209300.1	1.36872	1.20813	0.947534	-0.9659	-1.23035	-1.32813		Gohir.D07G228600.1	-0.774195	-2.02838	-1.12382	1.07645	1.38005	1.4699
Gohir.A05G022200.1	2.08742	0.930013	-0.0512764	-1.15268	-1.1822	-0.631273		Gohir.A11G243200.1	-0.461537	-0.601532	-0.803769	0.726309	0.665155	0.475373
Gohir.A10G014700.1	1.01922	0.576511	0.683313	-0.832255	-0.616946	-0.829845		Gohir.D12G146100.1	-0.269303	-0.749233	-0.792668	0.191416	0.890272	0.729517
Gohir.A08G107100.2	0.618565	1.35142	1.29762	-0.687703	-1.31461	-1.2653		Gohir.D04G187500.1	-0.315911	-0.959315	-0.757517	1.02363	0.395755	0.613353
Gohir.A09G201000.1	2.63575	1.69122	1.08132	-1.86387	-1.7524	-1.79202		Gohir.A04G140000.1	-0.546409	-1.71565	-1.81646	1.29403	1.31319	1.47129
Gohir.D01G009300.1	1.2899	0.491873	-0.0100125	-0.613134	-0.613134	-0.545496		Gohir.D07G139975.1	-0.681094	-0.681094	-0.681094	-0.112575	0.646019	1.50984
Gohir.D10G072900.1	0.800147	0.512685	0.291541	-0.464339	-0.570017	-0.570017		Gohir.A08G050200.1	-0.263832	-1.83343	-0.843443	0.400464	1.45218	1.08807
Gohir.D02G158350.1	1.45635	1.2076	0.796651	-1.11814	-1.25373	-1.08874		Gohir.D05G006100.1	-0.65753	-0.599864	-0.831297	0.979763	0.697775	0.411153
Gohir.D12G230200.1	1.0958	1.59225	1.26811	-1.01076	-1.37078	-1.57462		Gohir.D11G260400.1	-0.682601	-1.72388	-0.854035	1.21334	0.912708	1.13446
Gohir.D07G225600.1	0.112857	1.05315	1.70784	-0.709324	-0.995694	-1.16883		Gohir.A03G155700.1	-0.3344	-2.23919	-2.3363	1.23546	2.02418	1.65025
Gohir.A11G282565.1	0.819343	0.549872	0.705121	-0.726895	-0.511134	-0.836306		Gohir.A08G142500.1	-0.40873	-0.593962	-0.593962	0.569536	0.4082	0.618918
Gohir.A06G096700.1	1.05489	0.855585	0.88843	-1.08747	-0.654018	-1.05742		Gohir.D10G129201.1	-0.643372	-1.50903	-1.5242	1.53676	1.13313	1.00672
Gohir.D10G245500.1	0.63525	1.64577	1.42151	-0.920982	-1.34686	-1.43469		Gohir.A03G095800.1	-0.4094	-1.94313	-1.90454	1.26932	1.83296	1.15478
Gohir.D05G335600.1	0.685345	1.32707	0.875817	-1.02986	-0.914476	-0.943897		Gohir.A08G192300.1	-0.596865	-1.3835	-1.23086	1.24556	0.988004	0.977659
Gohir.D05G186500.3	0.843399	1.85224	1.88589	-1.58838	-1.60379	-1.38935		Gohir.A09G038400.3	-1.49821	-0.778233	-0.559756	0.361576	1.21516	1.25947
Gohir.A12G186500.1	1.6599	0.457349	0.407726	-0.995669	-0.712817	-0.816491		Gohir.A13G223000.1	-0.920803	-2.05907	-0.915324	0.967221	1.51029	1.41769
Gohir.D09G060800.1	0.110441	1.05882	1.46398	-1.06654	-0.662473	-0.904219		Gohir.A11G035600.1	-0.552652	-0.857334	-0.701834	0.69301	0.709812	0.708997
Gohir.A09G171600.1	1.72419	1.50072	1.65334	-1.66596	-1.82969	-1.3826		Gohir.A09G220132.1	-0.918125	-1.20736	-0.509594	-0.0455013	1.38658	1.294
Gohir.A01G013500.1	0.838351	0.580975	0.496991	-0.700726	-0.672816	-0.542774		Gohir.D02G021900.1	-1.80012	-1.52567	-0.608092	0.0309426	2.02599	1.87695
Gohir.D09G134500.1	1.62731	0.571188	0.553472	-0.587277	-1.12955	-1.03514		Gohir.D08G157200.1	-0.633867	-1.02299	-1.91268	1.15104	1.09311	1.32538
Gohir.A10G077000.1	0.550641	0.821059	0.909059	-0.830218	-0.550165	-0.900376		Gohir.D04G004900.1	-0.672036	-0.82878	-0.685202	0.519448	0.813858	0.852712
Gohir.D02G043601.1	1.20261	1.74235	1.24255	-1.02283	-1.69664	-1.46804		Gohir.D10G056700.1	-1.88942	-1.13819	-0.524622	1.06741	1.12501	1.35982
Gohir.D05G267600.2	1.27422	0.258769	0.297356	-0.697438	-0.551267	-0.581641		Gohir.A05G351800.1	-1.09191	-1.31885	-0.929616	1.86078	0.781938	0.697659
Gohir.A06G177200.1	0.479952	-0.0366935	0.920143	-0.512816	-0.33777	-0.512816		Gohir.A01G142900.1	-0.568434	-0.777575	-0.777575	0.600936	0.879607	0.643042
Gohir.D11G299050.1	0.150186	1.09794	0.911304	-0.531826	-0.859953	-0.767647		Gohir.D11G136400.1	-1.05444	-1.21607	-1.26188	1.05939	1.2559	1.2171
Gohir.A05G358700.1	0.806844	1.14714	0.905941	-0.952483	-1.08689	-0.820549		Gohir.A13G230900.1	-0.743603	-1.52337	-1.20333	1.04088	1.20232	1.22711
Gohir.A10G191900.1	0.674962	1.24285	1.15764	-1.035	-0.854068	-1.18639		Gohir.A02G149400.1	-0.37978	-1.03018	-0.915943	0.493485	0.981319	0.851096
Gohir.A11G206933.1	-0.101366	1.47511	1.3201	-0.950301	-0.810262	-0.93328		Gohir.A02G137700.1	-1.123	-2.10143	-0.961829	2.28076	1.04544	0.860047
Gohir.A03G181800.2	0.988817	0.803208	0.904967	-1.01448	-0.883185	-0.799329		Gohir.D10G141000.1	-0.572206	-0.605577	-0.963973	0.721294	0.755429	0.665033
Gohir.A11G034400.3	0.49737	1.2398	1.28733	-0.741015	-1.04545	-1.23804		Gohir.A10G133000.1	-0.517786	-0.548517	-0.553882	0.368265	0.656327	0.595593
Gohir.A06G144800.1	0.568226	0.504517	0.289308	-0.317911	-0.482003	-0.562137		Gohir.D02G121900.2	-0.470342	-1.41795	-1.61737	1.00779	1.2342	1.26369
Gohir.A05G032700.6	1.23312	1.42682	1.23912	-1.38915	-1.10623	-1.40368		Gohir.A02G109703.1	-0.239124	-0.526005	-0.526005	0.625204	0.503978	0.161952
Gohir.D10G163100.1	0.789569	1.14192	1.44662	-1.26748	-1.16591	-0.94472		Gohir.D08G149100.1	-0.823104	-1.12059	-0.885475	1.18626	0.751648	0.891264
Gohir.D09G065900.1	1.2846	1.79867	1.41463	-1.73946	-1.4301	-1.32834		Gohir.A10G197700.2	-1.10772	-2.26688	-2.7611	1.61391	2.25487	2.26692
Gohir.D08G130900.1	0.39845	1.6227	1.01366	-1.09727	-0.971566	-0.965978		Gohir.A12G125900.1	-0.37281	-0.466154	-0.670295	0.166437	0.7823	0.560523
Gohir.D02G125200.1	0.608748	0.861119	0.818635	-0.494137	-0.852854	-0.941511		Gohir.D06G044500.2	-0.697543	-1.07324	-0.866275	0.659176	0.710653	1.26723
Gohir.A01G064400.2	0.430085	1.27158	1.10384	-0.839109	-1.00801	-0.958395		Gohir.D12G034300.1	-0.722717	-1.54413	-1.05225	0.814149	0.883659	1.62129
Gohir.D10G037200.1	1.32494	1.35715	1.08118	-0.995897	-1.1876	-1.57976		Gohir.A09G040400.1	-0.747186	-1.43486	-1.45731	1.1128	1.24733	1.27923
Gohir.A08G155800.1	1.50149	0.803807	0.766517	-1.00908	-0.916853	-1.14588		Gohir.A03G006140.1	-0.555832	-0.928679	-0.912015	0.0107608	1.19066	1.1951
Gohir.D11G110500.1	0.331304	0.956764	0.775998	-0.661991	-0.71421	-0.687864		Gohir.A01G188100.1	-0.348054	-1.01454	-1.4051	0.76157	0.97809	1.02803
Gohir.A03G143400.3	-0.159755	1.38176	1.50223	-0.724971	-1.09298	-0.906279		Gohir.D13G184600.1	-0.859854	-1.9611	-0.738556	0.58802	1.55737	1.41413
Gohir.D10G242008.1	0.653309	0.577595	0.335585	-0.479209	-0.659356	-0.427924		Gohir.A12G066000.1	-0.627031	-1.08125	-1.17985	0.76056	1.14917	0.978399
Gohir.D07G059900.1	2.92675	0.581545	0.385543	-1.20934	-1.39789	-1.28661		Gohir.A07G146800.1	-0.672661	-0.882558	-1.31117	1.11312	1.21798	0.53528
Gohir.A06G078600.1	0.59514	1.2309	0.990659	-1.1978	-0.738486	-0.880408		Gohir.D01G057800.1	-0.32606	-0.602259	-0.602259	0.597492	0.441785	0.491301
Gohir.D13G039200.1	0.0318563	1.38094	1.26294	-0.668765	-0.895888	-1.11108		Gohir.D08G092866.1	-0.677	-0.84806	-0.769639	0.693112	0.689597	0.91199
Gohir.A10G026200.1	0.224998	0.928531	1.07827	-0.717451	-0.638007	-0.876336		Gohir.A12G207400.1	-1.04367	-2.03049	-0.723264	1.54546	1.09963	1.15233
Gohir.A11G290100.1	0.547731	0.651364	0.589004	-0.639448	-0.569934	-0.578717		Gohir.D13G136300.1	-0.445286	-1.64981	-1.20861	1.11399	1.05843	1.13128
Gohir.D12G196500.1	1.14841	1.46263	0.883619	-1.20452	-1.19684	-1.0933		Gohir.D05G098700.1	-0.551483	-1.26238	-0.8733	1.31319	0.918126	0.455854
Gohir.A13G033700.1	2.34545	0.905804	0.327381	-0.781858	-1.31795	-1.47882		Gohir.A06G082880.1	-1.24474	-1.11247	-0.84801	1.2579	1.12021	0.827105
Gohir.A03G020200.1	0.568188	1.23188	1.3085	-0.938636	-1.23616	-0.933763		Gohir.D07G056600.2	-0.674606	-0.924728	-0.950241	0.73817	0.974471	0.836934
Gohir.D05G375700.1	0.376833	0.572706	0.357498	-0.373491	-0.439599	-0.493947		Gohir.D09G203332.1	-0.383706	-0.816223	-0.597438	0.310137	0.71143	0.7758
Gohir.D11G022100.2	1.5957	0.905675	0.71417	-1.19994	-1.05419	-0.961413		Gohir.A04G079900.1	-0.218661	-1.98561	-1.09371	1.29818	1.09683	0.902973
Gohir.A05G223100.1	1.23657	1.31999	1.25951	-1.11727	-1.45618	-1.24263		Gohir.A02G020100.1	-0.663042	-2.02435	-1.41798	1.0303	1.70871	1.36636
Gohir.A10G106700.1	0.699252	0.633127	0.844407	-0.876696	-0.751498	-0.548591		Gohir.A05G039300.1	-0.27609	-0.603647	-0.899957	0.446574	0.802257	0.530863
Gohir.D08G146000.1	1.73223	0.852393	1.32948	-1.19313	-1.36049	-1.36049		Gohir.D07G098300.1	-1.53852	-1.22305	-1.13709	1.16476	1.44132	1.29259
Gohir.D11G295000.1	2.60753	0.746386	0.838087	-1.39733	-1.39733	-1.39733		Gohir.A01G166300.1	-0.620883	-0.724601	-1.35163	0.991352	0.612407	1.09336
Gohir.A04G145200.1	0.744272	0.350419	0.226325	-0.566627	-0.377719	-0.376671		Gohir.D01G192600.1	-0.332351	-0.772023	-0.952269	0.997245	0.636994	0.422403
Gohir.D12G219600.1	0.61545	0.994158	0.83512	-0.510675	-0.90152	-1.03253		Gohir.A05G157600.1	-0.675441	-2.19476	-2.07605	1.48763	1.69809	1.76053
Gohir.D06G196700.1	2.1429	1.20499	-0.0298521	-1.09133	-1.15082	-1.07588		Gohir.D11G034300.1	-0.986566	-2.36857	-1.56989	1.77138	1.69879	1.45486
Gohir.D02G199700.2	1.55957	0.68494	0.510408	-0.68139	-1.13674	-0.936791		Gohir.D08G179832.1	-0.868083	-1.05468	-1.34247	0.663859	1.22588	1.3755
Gohir.D08G032600.1	1.04956	1.45154	1.52521	-1.65199	-1.37941	-0.994899		Gohir.D12G010700.1	-0.503498	-0.54838	-0.532379	0.563793	0.362438	0.658026
Gohir.D05G004400.1	0.386082	1.50983	1.36168	-0.857619	-1.1823	-1.21767		Gohir.D06G152900.1	-0.728024	-1.59293	-1.67918	1.60085	1.31723	1.08205
Gohir.D02G097000.1	1.60346	1.47844	0.840593	-1.01144	-1.64554	-1.2655		Gohir.D09G043276.1	-0.473111	-0.703256	-0.630783	1.08904	0.402901	0.315207
Gohir.A08G173700.1	1.14429	1.07342	0.7909	-1.13673	-0.982215	-0.889664		Gohir.D12G102100.1	-0.37537	-0.807902	-0.778202	0.588696	0.490756	0.882023
Gohir.D05G387000.1	1.51015	1.49953	1.32107	-1.36489	-1.48846	-1.4774		Gohir.D12G002600.1	-0.345735	-0.793336	-1.1278	0.692318	0.506324	1.06823
Gohir.D10G249300.1	0.29014	1.60812	1.49582	-0.754932	-1.21326	-1.42589		Gohir.A07G065600.1	-0.304772	-0.904525	-0.874778	0.569639	0.601393	0.913043
Gohir.A02G038000.3	0.972854	1.58011	1.2617	-0.895805	-1.50407	-1.41479		Gohir.D13G110500.2	-1.0843	-2.41455	-2.21639	1.25621	1.98677	2.47226
Gohir.A06G104800.1	1.32849	1.50878	0.953156	-1.07059	-1.45342	-1.26641		Gohir.D10G012450.1	-0.434903	-0.742914	-0.742914	1.1659	0.315056	0.439778
Gohir.D02G011640.1	0.527442	0.938067	1.01521	-0.939519	-0.702178	-0.839024		Gohir.D11G061200.1	-0.354147	-0.516357	-0.516357	0.458907	0.562253	0.3657
Gohir.D10G234500.1	0.836939	1.22188	0.62624	-0.675795	-1.00463	-1.00463		Gohir.A02G147800.1	-0.301261	-1.86007	-1.88074	1.75539	1.09948	1.1872
Gohir.A04G014200.1	0.418711	1.1783	0.689293	-0.604681	-0.584318	-1.0973		Gohir.A05G399800.2	-0.633244	-0.633244	-0.371412	0.641763	0.915686	0.0804518
Gohir.D12G246900.1	3.17376	2.39402	2.31023	-1.59671	-3.19912	-3.08218		Gohir.A08G137400.1	-0.692385	-0.890251	-0.739691	0.893416	0.572849	0.856062
Gohir.A04G050400.1	0.611264	1.41494	0.907016	-0.903717	-0.606659	-1.42285		Gohir.D10G102700.1	-0.395467	-1.75109	-1.93148	1.56859	1.31949	1.18996
Gohir.D07G087600.4	0.209816	0.365094	0.668982	-0.458381	-0.399394	-0.386118		Gohir.D13G045200.1	-0.204049	-0.87372	-0.724882	0.595449	0.706599	0.500603
Gohir.A10G003800.1	1.76284	0.690616	0.70195	-1.37437	-0.880884	-0.900154		Gohir.A08G234200.1	-1.03675	-1.36306	-1.29015	0.512467	1.32953	1.84796
Gohir.D10G202400.1	0.724992	1.87356	1.42108	-0.739078	-1.50335	-1.7772		Gohir.A13G059700.1	-0.878666	-0.933776	-0.746087	0.460364	0.992895	1.10527
Gohir.A05G261200.1	0.82734	0.640769	0.951144	-0.866855	-0.896764	-0.655634		Gohir.A07G014500.1	-0.703587	-1.77888	-2.13811	1.58072	1.60606	1.4338
Gohir.A08G055500.2	0.210597	0.799783	0.835191	-0.6795	-0.643503	-0.522567		Gohir.D07G192800.1	-1.93286	-1.09185	-0.994499	0.917081	1.46737	1.63477
Gohir.D02G195800.2	0.222038	1.01627	0.738028	-0.507856	-0.706729	-0.761748		Gohir.A10G020700.1	-0.701504	-1.86211	-1.71797	1.36643	1.54199	1.37316
Gohir.A09G219000.2	1.04565	0.602829	0.510084	-0.805754	-0.480131	-0.872679		Gohir.A07G075100.1	-0.865419	-1.44143	-1.62264	0.321015	1.78589	1.82259
Gohir.A12G182000.1	0.092006	1.50368	1.36628	-0.721511	-1.20298	-1.03748		Gohir.D09G222800.1	-0.457109	-1.6934	-1.51869	0.831088	1.37139	1.46672
Gohir.D07G013766.1	0.297118	2.08266	1.3778	-1.32974	-1.59158	-0.836261		Gohir.A06G057000.1	-0.50693	-1.04804	-0.862836	1.08199	0.676456	0.659363
Gohir.D05G201200.1	1.26172	1.40149	1.2355	-1.14315	-1.58269	-1.17288		Gohir.D07G211400.1	-0.698127	-1.27509	-0.851115	1.00611	0.86501	0.953221
Gohir.D12G033400.1	0.0450105	0.817646	1.01235	-0.654411	-0.61425	-0.60635		Gohir.A11G126300.4	-0.835391	-1.41467	-1.33767	0.888227	1.35089	1.34862
Gohir.D02G098500.2	1.30159	1.63939	1.66074	-1.0951	-1.81083	-1.69579		Gohir.D10G059500.1	-0.739826	-1.70552	-1.1448	0.946165	1.14348	1.5005
Gohir.D06G011800.1	0.265479	1.30457	1.42347	-0.954018	-0.993377	-1.04612		Gohir.D11G193300.1	-0.516998	-0.694131	-0.552651	0.787689	0.418178	0.557912
Gohir.A03G057800.1	1.71146	1.60195	1.27484	-0.305945	-2.58321	-1.69908		Gohir.D11G234600.1	-0.402238	-0.5918	-0.590432	0.206532	0.630397	0.747543
Gohir.D02G178600.1	0.17429	0.925021	0.771127	-0.541959	-0.639188	-0.689291		Gohir.A05G127700.1	-1.08362	-1.24202	-1.2565	1.14001	1.24449	1.19764
Gohir.A05G084000.1	0.446255	0.581564	0.789528	-0.88964	-0.45233	-0.475377		Gohir.D04G033250.1	-1.28412	-1.06111	-0.898311	0.474986	1.45935	1.3092
Gohir.D12G275100.1	1.71711	1.17029	1.15229	-1.39805	-1.19169	-1.44995		Gohir.D11G142000.1	-0.114709	-1.44638	-1.29919	0.930227	1.02219	0.907859
Gohir.A05G015200.1	1.81908	1.43624	1.88562	-1.27991	-2.00194	-1.85909		Gohir.A01G053500.1	-1.10331	-1.3959	-0.889006	1.38059	1.14706	0.860557
Gohir.A06G004800.1	0.139416	1.15634	1.02961	-1.10691	-0.647009	-0.571447		Gohir.A03G169400.2	-0.792175	-0.536192	-0.60193	0.364616	0.736272	0.829409
Gohir.D11G317100.1	0.498831	1.2854	0.97716	-0.611445	-1.08839	-1.06156		Gohir.D04G179300.1	-0.311563	-1.74901	-2.22433	1.10985	1.57077	1.60428
Gohir.A10G117300.1	0.967044	1.66628	1.33826	-1.25754	-1.37246	-1.34159		Gohir.A09G217800.1	-0.592739	-0.617421	-0.574213	0.750015	0.44351	0.590847
Gohir.A06G063300.2	0.559561	1.33327	1.02791	-0.868398	-0.886389	-1.16595		Gohir.D09G222300.2	-1.23022	-1.3017	-0.736855	0.309839	1.4381	1.52084
Gohir.A03G152600.4	1.08014	1.13715	0.851436	-0.735931	-1.17842	-1.15437		Gohir.A10G226233.1	-0.550192	-0.730616	-0.178477	0.331259	0.61812	0.509906
Gohir.D08G095400.1	0.864478	0.774039	0.561062	-0.932382	-0.783689	-0.483507		Gohir.A11G270300.1	-0.611051	-0.603152	-0.825357	0.335936	0.830057	0.873567
Gohir.D05G073675.1	1.71272	0.704175	0.44371	-0.954653	-0.859093	-1.04686		Gohir.A05G290400.1	-0.685481	-1.54276	-1.88994	1.09897	1.45967	1.55953
Gohir.D12G111400.1	0.429633	0.384773	0.412108	-0.392102	-0.396507	-0.437905		Gohir.D05G075500.1	-0.425658	-0.561501	-0.324056	0.269487	0.582078	0.459649
Gohir.D13G223600.1	1.64414	1.88477	1.93773	-1.68971	-1.77757	-1.99936		Gohir.A09G018100.2	-0.534585	-1.40921	-1.10356	0.962854	0.978908	1.1056
Gohir.D06G162900.1	0.356623	1.38529	1.21496	-0.683389	-1.12115	-1.15234		Gohir.D10G116300.1	-0.470704	-1.58285	-2.66916	1.3866	1.68234	1.65378
Gohir.D07G088100.1	1.01458	1.32594	1.16297	-1.24194	-1.21403	-1.04753		Gohir.A06G025000.1	-1.15046	-1.76582	-2.37685	0.970776	2.31089	2.01146
Gohir.A04G055500.2	-0.0795754	0.288718	1.8846	-0.681284	-0.659966	-0.752495		Gohir.D07G214500.1	-0.684725	-1.64518	-1.42629	0.677446	1.55711	1.52164
Gohir.D02G181300.1	1.20303	0.568921	0.277671	-0.918218	-0.712247	-0.419154		Gohir.D06G134101.1	-0.940456	-0.940456	-0.940456	0.520024	0.538257	1.76309
Gohir.D13G161700.1	1.03276	0.698973	0.314319	-0.46759	-0.783763	-0.794697		Gohir.D07G209700.1	-0.255236	-0.780637	-0.59919	0.570062	0.546544	0.518458
Gohir.D02G140950.1	0.732246	0.992274	0.663658	-0.686536	-0.880871	-0.820771		Gohir.A05G167900.3	-1.31436	-1.06409	-0.788976	1.15815	1.02911	0.980172
Gohir.A10G232900.1	1.6851	0.991516	0.574556	-1.04939	-1.21295	-0.988828		Gohir.D04G042600.2	-0.536926	-1.38321	-1.28284	1.07105	0.953463	1.17847
Gohir.A12G013000.1	0.674042	0.934888	1.10398	-1.05075	-0.757487	-0.904674		Gohir.D13G064100.1	-0.957908	-0.957908	-0.957908	0.404982	1.51899	0.949751
Gohir.A08G011000.1	0.553156	0.234296	0.453871	-0.42018	-0.429398	-0.391746		Gohir.A13G146566.1	-0.549656	-0.976637	-0.815496	0.776853	0.75096	0.813976
Gohir.A07G089300.1	1.4471	0.718465	0.467139	-0.626325	-1.01864	-0.987737		Gohir.D10G231100.1	-1.20665	-1.96042	-1.12273	1.64306	1.30567	1.34107
Gohir.A05G052701.1	-0.0193174	0.636754	1.29217	-0.804181	-0.504478	-0.60095		Gohir.D01G080400.1	-0.948039	-2.20883	-1.49993	1.44174	1.59521	1.61985
Gohir.A03G047100.1	0.59234	0.268602	0.536408	-0.404649	-0.39386	-0.598842		Gohir.D13G215300.1	-0.483633	-1.06701	-0.93315	1.16676	0.614062	0.702978
Gohir.D13G032000.1	2.56453	1.37452	-0.15835	-0.774444	-1.51243	-1.49383		Gohir.A08G236000.1	-0.470732	-0.771833	-0.6203	0.347074	1.09696	0.418828
Gohir.A09G136500.1	1.44194	0.561288	0.584337	-0.431348	-1.0524	-1.10381		Gohir.D02G007150.1	-0.981941	-1.77121	-1.62506	0.911822	1.71802	1.74837
Gohir.D10G252200.1	1.23404	0.812883	0.384686	-0.851218	-0.69641	-0.883983		Gohir.D11G192900.1	-0.890653	-1.36686	-1.47897	0.567898	1.75502	1.41357
Gohir.D09G180900.1	0.432965	0.944045	0.833787	-0.37593	-0.843086	-0.99178		Gohir.D05G193500.1	-0.621461	-0.704053	-0.309242	0.611106	0.50581	0.517841
Gohir.D02G041200.1	0.721392	1.27708	0.756203	-0.919404	-0.751604	-1.08367		Gohir.D12G095700.2	-0.963803	-0.78748	-0.963803	0.633609	1.1189	0.962576
Gohir.D02G066000.1	0.228722	1.69749	1.34973	-1.26373	-0.97164	-1.04057		Gohir.A07G079700.1	-0.656975	-0.656975	-0.656975	0.742469	0.069856	1.1586
Gohir.D05G273800.1	0.915461	1.1442	1.18881	-0.94078	-1.12342	-1.18427		Gohir.D05G291601.1	-0.520979	-1.05402	-1.10813	0.742637	0.726166	1.21432
Gohir.D13G086100.1	0.625788	0.464415	0.422073	-0.565632	-0.704311	-0.242333		Gohir.A11G125200.1	-0.728217	-0.8248	-0.766564	0.493837	1.03349	0.792257
Gohir.D05G123500.1	0.933366	0.916374	0.885331	-0.592829	-1.25996	-0.882278		Gohir.D05G294400.1	-0.447804	-1.28128	-1.33615	1.07543	1.03124	0.958572
Gohir.A08G177500.1	0.310345	0.638742	0.390479	-0.489432	-0.344146	-0.505987		Gohir.D05G359200.1	-0.269202	-0.986599	-0.970266	0.614245	0.665665	0.946157
Gohir.D01G026100.1	0.48828	0.314723	0.664578	-0.59737	-0.430871	-0.439339		Gohir.A08G022600.1	-1.26152	-1.03983	-0.779253	0.17925	1.30344	1.5979
Gohir.A09G065700.1	0.994405	1.03975	1.0159	-0.864163	-1.25623	-0.929663		Gohir.D05G160350.1	-0.65385	-1.47155	-1.4286	1.08747	1.14693	1.3196
Gohir.D04G145500.1	0.724067	0.474178	0.220925	-0.39398	-0.358589	-0.666601		Gohir.A13G227800.1	-0.487363	-2.072	-1.90294	1.44708	1.66656	1.34866
Gohir.A11G199633.1	1.37854	0.995261	0.971181	-0.907777	-1.25439	-1.18282		Gohir.A01G087200.1	-0.42478	-2.20878	-1.16127	1.60897	1.18176	1.0041
Gohir.A07G008900.1	0.0739325	1.80642	1.73495	-1.34579	-1.13776	-1.13176		Gohir.A01G068500.3	-0.667381	-2.27643	-1.8127	1.37092	1.76349	1.62211
Gohir.A13G191500.1	0.680172	0.529678	0.725058	-0.380257	-1.03835	-0.516298		Gohir.D06G055300.1	-0.651453	-1.11323	-1.2304	1.24441	0.926347	0.824325
Gohir.D07G202900.1	0.19293	0.559742	0.682657	-0.47255	-0.656391	-0.306388		Gohir.D12G128100.5	-0.594111	-0.594111	-0.594111	0.725506	0.449933	0.606895
Gohir.D03G095600.1	1.16554	0.863194	1.37982	-1.39916	-1.0336	-0.975804		Gohir.A05G351200.1	-0.882962	-1.72732	-2.24171	1.7183	1.65196	1.48173
Gohir.A10G036400.1	1.61282	0.694732	0.55606	-0.803101	-0.934301	-1.12621		Gohir.D07G237600.1	-0.676287	-2.12955	-2.24336	1.61792	1.65707	1.77421
Gohir.D13G006200.2	0.953512	0.679913	-0.153562	-0.529852	-0.420158	-0.529852		Gohir.A08G191450.1	-1.06791	-1.1321	-1.07224	0.70322	1.45926	1.10978
Gohir.D01G024400.1	0.837543	0.246404	0.647267	-0.552583	-0.767951	-0.410681		Gohir.A06G041800.1	-0.597359	-1.07435	-1.07299	1.21882	0.775771	0.750107
Gohir.D03G115800.2	1.24449	0.541546	0.52847	-0.675793	-0.926521	-0.712189		Gohir.D02G017500.1	-0.945495	-1.92659	-1.53809	1.14889	1.56226	1.69902
Gohir.D11G048900.1	1.13678	1.81602	1.70298	-1.64566	-1.45283	-1.55728		Gohir.A01G003266.1	-0.415133	-1.35289	-1.05419	0.969807	1.02239	0.83002
Gohir.D11G317000.3	1.15026	0.735436	0.522234	-0.584409	-0.922211	-0.901315		Gohir.A09G145050.1	-0.31869	-0.523388	-0.584127	0.69683	0.617507	0.111867
Gohir.D06G092500.1	1.18421	1.80519	1.24326	-1.53978	-1.44352	-1.24936		Gohir.D01G017800.1	-0.936592	-1.04709	-0.70379	-0.300825	1.70202	1.28627
Gohir.A12G252450.1	0.334753	0.716381	0.966754	-0.57034	-0.930113	-0.517435		Gohir.D06G111700.1	-0.838834	-0.829956	-0.790188	0.932452	0.736863	0.789663
Gohir.D11G250400.4	0.291418	1.11221	1.08611	-1.00688	-0.628074	-0.854782		Gohir.A05G252200.1	-0.304784	-2.38272	-2.53573	1.58182	1.70283	1.93859
Gohir.A05G191700.1	1.71706	0.440415	0.475686	-0.601973	-1.01389	-1.01729		Gohir.A11G240550.1	-0.381779	-0.406378	-0.445355	0.329595	0.461196	0.442721
Gohir.A06G125700.1	0.0535091	0.621217	0.634508	-0.490482	-0.328272	-0.490482		Gohir.A08G053900.1	-0.709314	-0.883081	-0.883081	0.26227	1.10533	1.10787
Gohir.A03G196600.2	1.95073	1.69148	1.37725	-1.67405	-1.63669	-1.70871		Gohir.A11G278000.2	-0.795753	-1.95161	-1.92128	1.13418	1.61862	1.91585
Gohir.A01G150800.1	0.198312	1.12647	1.35232	-1.12618	-0.930185	-0.620732		Gohir.D12G119900.2	-1.59729	-1.00271	-1.47656	1.18068	1.68773	1.20814
Gohir.A06G208100.1	1.07783	1.46982	1.0649	-0.946927	-1.15852	-1.50711		Gohir.D08G269300.1	-0.45616	-0.896965	-1.27991	1.10497	1.05351	0.474551
Gohir.D05G156101.1	1.31791	0.153519	2.54435	-1.33859	-1.33859	-1.33859		Gohir.D04G049200.1	-0.953418	-1.78445	-1.08015	1.12264	1.46651	1.22887
Gohir.A04G108000.1	1.89323	1.71029	1.52707	-1.57648	-1.73497	-1.81913		Gohir.D07G238200.1	-0.448062	-1.47728	-1.58813	1.27218	1.13114	1.11014
Gohir.D02G162600.1	0.366952	1.08194	0.946093	-0.804802	-0.828427	-0.761752		Gohir.D09G248800.1	-0.427509	-0.99862	-0.936358	0.652408	0.932352	0.777728
Gohir.A10G142400.1	2.85753	0.121684	-0.422554	-0.778119	-0.920564	-0.857973		Gohir.D07G089500.1	-0.695289	-1.36222	-1.68887	1.82377	0.986027	0.93658
Gohir.D07G187250.1	0.297893	1.15405	1.06542	-0.982469	-0.820259	-0.714634		Gohir.A10G224200.1	-0.852454	-1.0859	-0.401581	1.00565	0.726993	0.607293
Gohir.A09G135400.1	0.708357	0.551891	0.743186	-0.931737	-0.635536	-0.436161		Gohir.D12G150500.1	-0.378685	-0.781802	-0.828642	0.66603	0.526938	0.796161
Gohir.D04G074200.1	1.00635	1.10495	1.73896	-1.48969	-1.17663	-1.18393		Gohir.A09G208600.1	-0.708813	-0.822513	-0.822513	0.0595426	0.956536	1.33776
Gohir.D10G145600.1	0.727125	1.73617	1.39258	-1.14293	-1.09454	-1.61841		Gohir.D11G212100.1	-0.437392	-1.53606	-1.36536	0.674661	1.25031	1.41385
Gohir.D05G157700.1	0.66895	1.49424	1.74951	-1.01917	-1.39607	-1.49746		Gohir.A13G036600.1	-0.810582	-0.82059	-0.942777	1.02747	0.628765	0.917714
Gohir.D07G069600.1	1.46719	0.950865	0.772961	-0.873838	-1.18102	-1.13615		Gohir.A03G011150.1	-0.509848	-0.576082	-0.388286	0.514388	0.577304	0.382525
Gohir.A09G205400.1	0.962094	1.36647	1.40545	-1.04891	-1.28037	-1.40474		Gohir.A12G104200.1	-0.768266	-1.19625	-1.20916	0.958702	1.11425	1.10073
Gohir.D11G262600.1	3.05914	0.801295	0.681653	-1.70129	-1.3474	-1.4934		Gohir.D11G099400.1	-1.31826	-1.26262	-0.627671	0.103532	1.25895	1.84607
Gohir.A03G119300.1	0.448438	1.82086	1.67902	-1.58738	-1.23695	-1.12399		Gohir.D08G188300.1	-0.768138	-1.06451	-0.844978	1.32322	0.620982	0.733427
Gohir.D02G011501.1	1.16196	1.32622	1.05938	-0.821838	-1.36286	-1.36286		Gohir.D12G256500.2	-0.436068	-0.612729	-0.45511	0.53781	0.455408	0.51069
Gohir.D11G002800.1	2.17242	0.199239	0.511749	-1.02138	-0.830287	-1.03174		Gohir.D01G081200.1	-0.819745	-1.16814	-1.27314	1.25372	0.981587	1.02572
Gohir.D07G048700.2	0.455298	1.61439	1.42791	-0.499186	-0.836764	-2.16165		Gohir.D06G053900.1	-0.908176	-1.17112	-2.05056	0.817529	1.88264	1.42968
Gohir.A12G127900.1	-0.15433	1.13667	1.42058	-0.923531	-0.836781	-0.642602		Gohir.D05G083000.1	-0.484405	-1.48085	-1.04787	1.04822	0.970877	0.994031
Gohir.A07G133650.1	-0.450246	1.30197	1.4062	-0.740293	-0.718643	-0.79898		Gohir.D06G211600.2	-0.416784	-1.41063	-1.38023	0.63414	1.27671	1.29679
Gohir.A03G012300.1	1.22117	0.449135	0.173964	-0.604732	-0.559705	-0.679834		Gohir.D07G014200.2	-0.892519	-1.29269	-1.39914	1.13422	1.41007	1.04006
Gohir.D08G206800.1	0.555928	1.34811	1.48235	-1.03489	-1.00394	-1.34756		Gohir.A07G190400.2	-0.66613	-0.723348	-1.19463	1.41269	0.596656	0.574763
Gohir.A06G007700.1	1.24251	0.232009	0.470488	-0.964634	-0.315932	-0.664441		Gohir.A01G111400.1	-0.828588	-1.20213	-1.34553	1.2579	1.11718	1.00117
Gohir.D04G059200.1	1.76508	0.302948	0.484733	-0.990086	-0.896976	-0.665694		Gohir.A04G136350.1	-0.770361	-2.15029	-2.16856	1.27867	1.91187	1.89866
Gohir.A05G181400.1	0.856371	1.40836	1.44461	-1.22391	-1.17454	-1.3109		Gohir.D12G230500.1	-0.535208	-0.535208	-0.327315	0.540667	0.487692	0.369372
Gohir.D09G163100.1	1.27614	1.1463	1.17598	-1.42483	-0.889812	-1.28378		Gohir.A12G121700.1	-1.29589	-0.86372	-0.538207	1.3492	0.771218	0.577397
Gohir.D12G212800.1	0.689056	1.08912	1.12008	-0.958868	-0.79272	-1.14667		Gohir.D05G227900.1	-0.666158	-1.26103	-0.787062	0.732941	0.699701	1.28161
Gohir.D08G179000.1	1.11116	1.31978	1.14461	-1.22822	-1.12775	-1.21958		Gohir.D01G136800.1	-0.776213	-0.461029	-0.781169	0.73395	0.697005	0.587456
Gohir.A13G123200.1	0.579774	0.453286	0.698757	-0.630191	-0.460567	-0.641059		Gohir.A05G013700.1	-1.60459	-0.691086	-0.702817	0.891566	1.31571	0.791215
Gohir.A11G211400.1	2.06932	0.497611	0.604294	-1.29842	-0.803358	-1.06945		Gohir.D07G028400.1	-0.45892	-1.23923	-1.22918	0.511963	1.17117	1.24419
Gohir.D07G095500.1	1.27419	1.17254	0.670822	-1.18536	-0.956251	-0.975939		Gohir.A05G074900.1	-0.800573	-1.84901	-2.05099	1.46001	1.63482	1.60574
Gohir.A05G026100.1	0.332851	2.28707	1.57968	-0.787483	-1.64214	-1.76998		Gohir.A01G013700.1	-0.947754	-0.778125	-0.625292	0.847359	0.730151	0.773661
Gohir.A13G128700.1	1.08276	0.418095	0.617243	-0.625601	-0.830609	-0.661886		Gohir.D01G194900.1	-0.356523	-0.387624	-0.696801	0.298865	0.499177	0.642907
Gohir.A11G026166.1	0.275949	1.92301	1.81087	-1.10756	-1.73842	-1.16385		Gohir.D12G074700.1	-0.468943	-0.650146	-0.634146	0.530465	0.322785	0.899985
Gohir.D12G253000.1	0.36438	0.89579	1.2855	-0.582257	-1.04054	-0.922872		Gohir.D03G116600.5	-1.12819	-1.20139	-1.7774	1.02325	1.39953	1.68421
Gohir.D13G072700.1	0.775356	1.4605	1.40213	-1.05246	-1.08006	-1.50546		Gohir.A11G086500.1	-0.616555	-1.54643	-2.08274	1.16511	1.56359	1.51703
Gohir.D06G020000.1	1.25432	0.636477	0.291811	-0.727535	-0.727535	-0.727535		Gohir.D11G263900.3	-0.746653	-0.956253	-1.1738	0.668778	1.09622	1.11171
Gohir.A05G189400.1	1.81078	0.484152	0.455971	-0.795404	-0.907656	-1.04785		Gohir.D05G050600.1	-1.01484	-2.32955	-0.753918	2.11155	1.13353	0.85324
Gohir.A11G214200.1	1.23061	1.37375	1.68301	-1.99459	-1.37909	-0.9137		Gohir.D01G004550.1	-0.56951	-0.980856	-0.864966	1.31127	0.812642	0.291423
Gohir.D08G172700.1	1.86115	1.90361	1.79721	-1.47424	-1.96991	-2.11782		Gohir.D06G050500.1	-0.877287	-1.61627	-1.19189	1.16025	1.1882	1.33699
Gohir.A08G163400.2	1.38226	0.868225	1.05468	-1.16779	-1.29661	-0.840764		Gohir.D11G120600.1	-0.648309	-1.1938	-0.92362	0.377619	1.2821	1.10601
Gohir.A03G103100.1	0.540887	0.932925	0.117635	-0.522499	-0.586241	-0.482707		Gohir.A10G145500.1	-0.474402	-0.761283	-0.348773	0.333628	1.01356	0.237273
Gohir.D09G108800.1	1.20848	0.512845	0.513824	-0.600892	-0.717076	-0.917179		Gohir.A05G240700.7	-0.462987	-0.725153	-0.782205	0.461299	0.862408	0.646638
Gohir.A10G049500.1	1.319	0.949957	1.03456	-0.988642	-1.27316	-1.04172		Gohir.A05G028700.1	-0.704557	-0.535977	-0.454579	0.243424	0.698159	0.75353
Gohir.D12G263700.1	0.331913	1.48562	0.884792	-0.916414	-0.945766	-0.840141		Gohir.D11G223400.1	-1.05034	-1.05034	-1.05034	2.35197	1.84941	-1.05034
Gohir.A06G076300.1	0.910581	1.16346	1.13855	-0.908549	-1.39549	-0.908549		Gohir.D12G054200.1	-0.877103	-2.09326	-0.866149	1.6799	1.10477	1.05184
Gohir.D08G184500.1	0.798788	0.850318	0.94747	-0.912688	-0.903872	-0.780016		Gohir.A01G000301.1	-1.02801	-0.608224	-0.697229	0.766781	0.838824	0.727862
Gohir.A12G111400.1	0.771858	1.07016	1.13288	-0.559928	-1.33581	-1.07916		Gohir.D03G103600.1	-0.555918	-1.81604	-1.24114	1.26202	1.0771	1.27397
Gohir.A11G002000.1	0.0699878	1.21579	0.7833	-0.669603	-0.792964	-0.606511		Gohir.D01G125800.1	-0.55079	-2.05292	-2.22663	1.96432	1.54688	1.31914
Gohir.D09G106400.1	1.14267	1.75263	1.43186	-1.14852	-1.61262	-1.56601		Gohir.A11G094400.1	-0.694721	-0.856931	-0.420769	0.263421	1.13511	0.573889
Gohir.D03G148500.1	0.171848	1.06847	1.26885	-0.759203	-0.876883	-0.873089		Gohir.A02G009116.1	-0.752465	-0.752465	-0.752465	-0.129535	0.945309	1.44162
Gohir.A11G070600.1	1.35882	0.568889	0.598054	-1.09556	-0.512869	-0.917336		Gohir.A10G118550.1	-0.599534	-1.26393	-1.62856	1.91541	1.65549	-0.078876
Gohir.A03G018500.1	1.58155	1.22928	0.541185	-1.23033	-1.11677	-1.00492		Gohir.A08G157700.1	-1.15297	-1.74502	-2.22357	0.837663	2.2163	2.0676
Gohir.D04G032100.1	0.93092	1.15301	1.20055	-0.785089	-1.17008	-1.32931		Gohir.D05G053300.1	-0.987351	-1.44528	-1.1787	1.31149	1.22407	1.07576
Gohir.A07G201300.1	0.882167	0.608734	0.352427	-0.631837	-0.754525	-0.456967		Gohir.A06G022400.2	-0.872184	-0.889266	-0.582618	0.64252	0.708854	0.992694
Gohir.A12G226300.1	2.55088	1.32681	1.35172	-2.18535	-1.81842	-1.22564		Gohir.A01G186201.1	-0.460606	-1.22996	-0.668715	0.924833	0.773217	0.661227
Gohir.D12G006500.1	0.767888	0.849716	0.872453	-0.824791	-0.817074	-0.848192		Gohir.A03G213500.1	-0.830415	-1.02739	-0.656366	-0.104208	1.24536	1.37302
Gohir.A03G024000.1	3.2876	2.04733	1.10588	-2.29848	-2.39503	-1.74731		Gohir.A09G026600.1	-0.64111	-0.557562	-0.568674	0.222119	0.781969	0.763258
Gohir.D01G089500.2	0.771044	1.23156	1.3863	-0.935352	-1.37575	-1.0778		Gohir.A03G181200.1	-2.00323	-2.00323	-2.00323	2.14733	2.04867	1.81368
Gohir.A08G147500.1	-0.488516	1.34059	2.17055	-0.987841	-1.07587	-0.958919		Gohir.D12G089500.1	-0.647179	-0.569435	-0.756932	0.413582	0.568704	0.99126
Gohir.D05G241800.7	0.137025	0.880957	0.988831	-0.909886	-0.430585	-0.666341		Gohir.D05G282332.1	-0.578589	-0.899216	-0.971232	0.287237	1.33253	0.829269
Gohir.A12G182200.1	1.8437	0.926207	0.521625	-0.926261	-0.95887	-1.40641		Gohir.D06G212700.1	-0.895054	-1.32839	-1.50885	1.04817	1.43371	1.25042
Gohir.A13G219950.1	1.16178	1.44909	1.02492	-1.06504	-1.28096	-1.28979		Gohir.D03G002200.1	-0.600185	-1.89743	-2.28401	1.28667	1.72316	1.77179
Gohir.D07G069800.1	1.26305	1.49279	1.5523	-0.980432	-1.5663	-1.76142		Gohir.D02G125500.1	-0.861092	-1.46006	-1.84722	1.55547	1.35143	1.26147
Gohir.A08G002200.1	0.6766	1.24363	1.2645	-1.00976	-1.12626	-1.04871		Gohir.A11G266600.1	-1.2241	-1.16478	-1.76094	0.741559	1.76695	1.64132
Gohir.D02G041900.2	0.267664	0.761309	1.10566	-0.639352	-0.501109	-0.99417		Gohir.A08G250100.1	-0.534843	-0.858945	-0.591565	0.87115	0.621499	0.492704
Gohir.D12G126000.1	1.02419	1.89557	1.48576	-1.07695	-1.58631	-1.74226		Gohir.A07G179200.1	-0.246568	-0.55458	-0.55458	0.514435	0.583579	0.257713
Gohir.D12G202900.1	1.63681	0.711203	0.774682	-1.15647	-1.09532	-0.87091		Gohir.D03G043701.1	-1.61315	-1.58303	-0.207264	0.574088	0.886064	1.94329
Gohir.D06G165200.1	0.63805	1.26404	1.17736	-1.27532	-0.879726	-0.924391		Gohir.A05G051400.1	-0.615296	-1.20562	-0.615296	0.958915	0.679519	0.797783
Gohir.A09G122600.1	1.66148	0.817421	0.734113	-1.08382	-1.34191	-0.787292		Gohir.A01G155800.1	-0.408942	-0.765014	-1.09958	1.1192	0.36874	0.785601
Gohir.D05G249800.1	0.209139	0.760173	1.00546	-0.65325	-0.756941	-0.564585		Gohir.D02G125000.1	-0.994045	-1.11996	-0.491792	0.572982	0.867691	1.16512
Gohir.A13G116100.1	0.722816	1.04077	1.22055	-0.317316	-1.32937	-1.33746		Gohir.D01G148700.1	-0.814062	-0.791764	-0.744744	0.79644	0.884371	0.669758
Gohir.A09G137700.1	1.05778	0.534526	0.77631	-0.603482	-0.85674	-0.908391		Gohir.D02G064500.1	-0.439057	-0.838952	-0.486335	0.554162	0.677851	0.532332
Gohir.D12G023300.1	1.37088	1.26405	0.853615	-0.820395	-1.31863	-1.34952		Gohir.D03G113600.1	-0.531996	-1.06867	-0.613393	0.468004	0.99028	0.755775
Gohir.A06G070800.4	1.07434	0.891131	1.26708	-0.790778	-1.35447	-1.0873		Gohir.D03G048300.1	-0.344546	-1.55887	-1.15192	1.65654	0.805046	0.593749
Gohir.A04G103900.1	1.9933	0.607985	0.861531	-0.847871	-1.41427	-1.20067		Gohir.D01G147000.1	-0.204296	-2.0908	-2.91358	1.98529	1.60636	1.61702
Gohir.A11G040800.1	0.892739	0.915616	0.648794	-0.699157	-0.9118	-0.846192		Gohir.D11G205900.1	-2.27838	-0.876244	-1.21801	0.792698	1.91121	1.66873
Gohir.A11G106700.1	1.01994	1.14274	0.861749	-1.07631	-0.902042	-1.04608		Gohir.D07G122200.1	-0.451418	-0.502516	-0.501148	0.303665	0.566308	0.585108
Gohir.A10G147800.1	0.27466	1.18958	0.803462	-0.651051	-0.681908	-0.934742		Gohir.A12G265200.1	-1.21888	-1.14652	-1.12868	0.189696	1.47914	1.82525
Gohir.A13G235200.1	0.761432	1.27484	1.13825	-0.919058	-1.01452	-1.24094		Gohir.D03G140001.1	-0.309576	-0.795394	-0.706483	0.298656	0.494983	1.01781
Gohir.D01G029800.1	1.56037	0.491315	0.372416	-1.04182	-0.565752	-0.816535		Gohir.D10G085300.1	-0.653283	-0.672471	-0.929482	0.530999	0.866285	0.857951
Gohir.D05G052700.1	0.635145	1.04839	1.26749	-1.20175	-0.56546	-1.18382		Gohir.A01G123900.4	-0.491908	-1.33118	-0.66636	0.640743	0.908543	0.940158
Gohir.D05G207600.1	0.429629	0.601209	1.64205	-0.956078	-0.956078	-0.760731		Gohir.A02G038301.1	-1.94466	-1.11029	-0.559732	0.54806	1.5664	1.50022
Gohir.A09G209700.1	1.03648	1.63023	1.13192	-0.63644	-1.61698	-1.54522		Gohir.A09G213654.1	-1.33543	-2.50646	-2.58207	2.54945	2.14585	1.72868
Gohir.A11G072400.2	0.683066	2.45364	1.15441	-1.47824	-1.43672	-1.37616		Gohir.D13G206800.1	-0.880556	-2.37055	-1.5097	1.81823	1.43444	1.50813
Gohir.A05G202200.1	0.773832	0.295921	0.434511	-0.462458	-0.300043	-0.741763		Gohir.A13G188400.1	-0.987117	-2.19748	-1.51532	1.85392	1.48776	1.35824
Gohir.A02G099300.1	1.4469	1.97398	1.18963	-1.06599	-1.64594	-1.89858		Gohir.A02G121401.1	-0.286886	-0.85832	-0.583313	0.341431	0.685671	0.701417
Gohir.D11G322400.1	0.581469	0.392021	0.3267	-0.271689	-0.634404	-0.394097		Gohir.D04G061500.1	-0.345099	-0.495659	-0.495659	0.179705	0.674907	0.481804
Gohir.A09G190200.2	0.049519	0.947936	1.37642	-0.765524	-0.881001	-0.727345		Gohir.D13G182600.1	-0.795945	-2.48234	-1.39299	1.75751	1.54747	1.36629
Gohir.A03G162100.1	0.979449	0.966269	0.710103	-0.958912	-0.907719	-0.78919		Gohir.A11G063500.1	-0.813733	-2.06256	-1.40466	1.4367	1.41054	1.43371
Gohir.D05G192800.1	0.541374	0.799039	0.521752	-0.411179	-0.716699	-0.734286		Gohir.A06G081700.1	-0.898086	-1.2449	-0.587792	1.096	0.720108	0.914674
Gohir.A05G165100.1	0.716667	0.742948	0.616354	-0.745487	-0.758662	-0.57182		Gohir.D12G275600.2	-0.756653	-1.36446	-1.0913	0.835108	1.17042	1.20689
Gohir.D11G106100.1	0.808885	1.46833	1.89808	-1.47427	-1.58074	-1.12028		Gohir.D09G180300.1	-0.508774	-0.750747	-0.755983	0.664291	0.596878	0.754334
Gohir.A05G137600.1	0.695857	1.16867	1.14691	-1.02289	-1.02615	-0.962396		Gohir.D06G083601.1	-0.760373	-0.820107	-0.507015	-0.146446	1.0161	1.21785
Gohir.D02G095000.1	1.04223	0.828413	0.606957	-0.641626	-1.00206	-0.833916		Gohir.A05G267100.1	-1.34906	-1.09806	-0.539872	1.39114	0.840201	0.755644
Gohir.A04G041900.1	1.737	1.07704	0.681097	-0.903866	-1.29563	-1.29563		Gohir.A10G123200.1	-0.472231	-0.704367	-0.780242	0.629556	0.85899	0.468293
Gohir.D08G176500.2	1.56453	0.742654	0.833201	-0.977766	-0.932911	-1.22971		Gohir.A12G100300.1	-0.769321	-0.769321	-0.769321	0.819004	1.14524	0.343713
Gohir.A03G122300.2	0.700111	0.377082	0.526674	-0.440808	-0.580861	-0.582199		Gohir.A06G164500.1	-0.42887	-0.638012	-0.530994	0.585411	0.486978	0.525487
Gohir.D09G188300.1	0.791911	1.21562	1.18729	-1.06014	-1.00496	-1.12972		Gohir.D13G165100.2	-0.982481	-1.73432	-1.08068	0.895089	1.42038	1.482
Gohir.D01G023400.2	1.40745	1.49447	1.53935	-1.48336	-1.57751	-1.3804		Gohir.A06G040600.1	-0.632846	-1.17272	-1.39966	1.03444	1.13976	1.03102
Gohir.A01G072400.1	-0.174814	1.33737	1.33746	-0.77935	-1.05629	-0.664372		Gohir.D05G248250.1	-0.74424	-0.46835	-0.48101	0.43336	0.610877	0.649363
Gohir.D11G157400.1	-0.165436	0.755325	1.34411	-0.644666	-0.644666	-0.644666		Gohir.A12G213300.3	-0.358448	-0.772612	-0.917002	0.620426	0.746437	0.681198
Gohir.D12G207200.1	1.66574	1.04112	0.999163	-0.763738	-1.41601	-1.52628		Gohir.A04G081100.1	-1.12152	-1.3161	-1.04339	1.45906	1.18233	0.839609
Gohir.A07G141100.1	1.01533	0.542486	0.563361	-0.758061	-0.86556	-0.497556		Gohir.A12G114700.1	-0.36268	-0.591728	-0.363729	0.429013	0.592598	0.296527
Gohir.D10G234300.2	1.10055	0.724416	1.00103	-1.02144	-1.15509	-0.649468		Gohir.D03G142500.1	-1.08427	-1.54721	-0.656889	0.535459	1.38869	1.36422
Gohir.D03G159250.1	0.186094	0.74944	0.785504	-0.572048	-0.667505	-0.481484		Gohir.D09G041200.1	-0.610642	-1.7343	-1.76977	1.2525	1.45272	1.4095
Gohir.A02G005300.1	0.105874	1.638	1.58563	-1.34759	-1.03467	-0.947237		Gohir.A07G184700.1	-0.86495	-1.30074	-1.61514	0.820991	1.60779	1.35205
Gohir.D06G189900.1	2.43575	0.327086	0.516287	-1.03972	-1.1197	-1.1197		Gohir.A11G030971.1	-0.837867	-2.37108	-1.9705	1.7322	1.80003	1.64722
Gohir.A02G076700.1	0.800931	1.13096	1.03375	-0.989601	-1.14128	-0.834756		Gohir.D03G060400.1	-0.313318	-1.4857	-1.55767	1.08751	1.26715	1.00203
Gohir.D08G183200.1	1.5236	0.682947	1.11566	-1.45092	-0.923677	-0.947605		Gohir.A07G138200.1	-0.445367	-0.949801	-0.718041	0.580488	0.819805	0.712916
Gohir.D12G231300.1	1.11118	0.621549	0.38955	-0.561991	-0.90636	-0.653928		Gohir.A01G194600.1	-0.721376	-1.33365	-1.09949	0.990854	1.09051	1.07316
Gohir.D11G246500.1	0.74754	1.42584	1.2431	-1.25246	-1.22664	-0.937376		Gohir.D05G072100.1	-1.06199	-2.65888	-1.56871	1.39114	2.0671	1.83134
Gohir.A05G130400.1	0.563155	1.35493	1.13353	-0.617863	-1.23585	-1.1979		Gohir.D08G136000.1	-0.791332	-1.03636	-0.750109	0.846845	0.837297	0.893657
Gohir.D03G136500.1	0.267391	1.23313	0.579285	-0.557533	-0.699314	-0.822956		Gohir.D12G243200.2	-0.538015	-0.906277	-0.525107	0.490655	0.633733	0.845011
Gohir.D07G009100.1	0.0912989	1.2619	1.39452	-0.943715	-0.887826	-0.916181		Gohir.D06G128500.1	-0.726773	-1.0489	-0.392002	0.262964	1.04024	0.864468
Gohir.D07G009400.1	0.266358	1.04201	1.68414	-0.765211	-0.902131	-1.32517		Gohir.A05G322100.1	-0.414916	-0.782584	-0.912066	0.476189	0.764871	0.868506
Gohir.D01G203900.1	2.28747	1.87085	1.46459	-1.89491	-1.96715	-1.76085		Gohir.D06G069900.1	-0.685488	-1.04856	-0.65079	0.734983	0.920393	0.729462
Gohir.D11G003000.1	0.668418	1.28132	0.689326	-0.992742	-1.28333	-0.363		Gohir.A13G048000.1	-0.56518	-0.606501	-0.82347	0.544803	0.723555	0.726793
Gohir.A06G071900.1	0.626296	1.59422	1.13579	-1.24688	-1.17744	-0.931987		Gohir.D11G320100.1	-0.463417	-1.4881	-1.7126	1.29791	1.29777	1.06844
Gohir.A08G091300.1	0.905093	0.932204	0.132503	-0.6566	-0.6566	-0.6566		Gohir.D07G195300.1	-1.2165	-2.15101	-1.7	1.50685	2.16922	1.39144
Gohir.D08G252600.1	0.883789	1.27624	0.494119	-0.91141	-0.952116	-0.790626		Gohir.D10G084600.1	-0.368771	-0.655049	-0.488925	0.535459	0.554333	0.422953
Gohir.D05G107300.1	0.97539	0.719738	0.124543	-0.239054	-0.775305	-0.805312		Gohir.D01G024900.2	-0.527852	-0.9307	-0.534612	0.212557	0.897454	0.883152
Gohir.A09G019400.2	0.545376	0.669307	0.387328	-0.634867	-0.462873	-0.504271		Gohir.D07G058700.1	-0.495939	-1.04711	-1.15356	0.740276	0.983354	0.972974
Gohir.D01G089600.1	-0.164238	1.14526	1.67088	-1.22851	-0.755537	-0.667859		Gohir.A11G107300.1	-0.47936	-0.871128	-0.519499	0.243239	0.891434	0.735314
Gohir.D05G120800.1	2.10526	2.12092	1.79284	-1.65944	-2.1541	-2.20548		Gohir.D04G121400.1	-0.159751	-1.57733	-1.49827	0.894788	1.20832	1.13224
Gohir.A01G086600.1	1.11571	1.1172	0.529857	-0.970114	-0.999467	-0.793188		Gohir.D05G022100.1	-0.612523	-0.953162	-0.906019	0.943153	0.872572	0.655978
Gohir.A12G083765.1	0.371781	0.925432	0.911999	-0.509111	-0.793546	-0.906555		Gohir.A01G022400.1	-0.591775	-0.4927	-1.70429	0.659453	1.35094	0.778368
Gohir.D10G110500.1	2.90156	-0.0352292	0.0895773	-0.967325	-0.920707	-1.06788		Gohir.D02G179400.1	-0.241635	-1.47396	-0.949518	0.582139	0.848267	1.23471
Gohir.D09G170185.1	0.539558	1.02071	0.831072	-0.802062	-0.480367	-1.10891		Gohir.D09G001700.1	-0.864836	-1.54166	-1.49065	1.11852	1.31146	1.46717
Gohir.A03G165200.1	0.684469	0.927256	0.929338	-0.961713	-0.887089	-0.692261		Gohir.D08G184700.1	-1.16408	-1.59366	-1.1152	1.53775	1.22944	1.10575
Gohir.A01G073900.1	0.699539	1.70809	0.985381	-1.28949	-0.851522	-1.252		Gohir.A09G037200.2	-0.372118	-1.24754	-1.80019	0.465313	0.967274	1.98726
Gohir.A13G169800.1	-0.191396	1.8472	0.706663	-0.707773	-0.68509	-0.969604		Gohir.D13G183400.1	-0.717844	-2.12905	-2.67861	1.24617	2.2548	2.02454
Gohir.D05G225300.1	-0.0806984	1.59468	1.4281	-1.0752	-1.06791	-0.798972		Gohir.A02G067400.1	-0.734996	-1.22636	-0.939455	0.313682	1.04608	1.54105
Gohir.A06G027000.1	1.46864	1.09436	1.04761	-1.09353	-1.19704	-1.32004		Gohir.A06G150800.1	-0.561504	-0.602604	-0.636944	0.408022	0.578054	0.814976
Gohir.A05G096900.1	1.2573	1.16882	1.61495	-1.73834	-1.09031	-1.21243		Gohir.A13G181400.1	-0.367905	-0.940785	-0.51704	0.747151	0.42088	0.657699
Gohir.A07G202700.2	0.506202	1.06785	0.912685	-0.93998	-0.938097	-0.608661		Gohir.A02G056800.2	-0.324865	-0.539276	-0.587491	0.587193	0.554796	0.309643
Gohir.A01G197900.1	0.19135	0.886779	0.736978	-0.574265	-0.65424	-0.586602		Gohir.D08G093500.1	-0.312564	-1.0775	-1.45961	0.527665	0.975373	1.34663
Gohir.D09G097500.1	1.19215	1.07902	0.56796	-0.64342	-1.08639	-1.10933		Gohir.A09G094000.1	-1.10593	-1.37291	-1.4776	1.06742	1.62975	1.25927
Gohir.D06G009900.1	0.643102	1.34446	1.38312	-1.19908	-0.747247	-1.42436		Gohir.A07G106400.1	-0.638272	-0.801467	-0.701194	0.863513	0.586182	0.691237
Gohir.A08G128300.2	0.867871	0.691606	0.686206	-0.445475	-1.03975	-0.760462		Gohir.D07G064400.1	-0.810496	-1.00424	-0.98679	0.664892	0.858313	1.27832
Gohir.D11G151700.1	-0.235502	1.26669	1.28867	-0.530215	-0.689422	-1.10023		Gohir.A04G065000.1	-0.465746	-1.1775	-0.979405	0.722089	0.922092	0.978472
Gohir.A03G029600.1	2.99866	2.20171	2.33244	-2.32286	-2.56978	-2.64017		Gohir.A05G157400.1	-0.400449	-0.585681	-0.310674	0.534671	0.519997	0.242138
Gohir.D11G159500.1	2.20972	1.23173	1.22717	-1.67348	-1.65216	-1.34298		Gohir.D05G021220.1	-0.579168	-0.579168	-0.579168	0.891239	0.782039	0.0642264
Gohir.A03G172600.2	0.460892	1.00223	1.10994	-0.808818	-0.854872	-0.909372		Gohir.A10G093100.1	-0.956121	-2.52352	-1.66435	1.23707	2.03311	1.87382
Gohir.D09G112501.1	2.31208	1.2055	0.843446	-1.47954	-1.36999	-1.5115		Gohir.D05G159900.1	-0.553077	-1.1137	-0.770757	0.96159	0.722023	0.753919
Gohir.D09G218400.1	0.708676	1.44048	1.06466	-0.400236	-1.38782	-1.42576		Gohir.D03G085900.1	-0.479323	-0.600861	-0.570089	0.172254	0.70664	0.77138
Gohir.A05G303400.1	1.69048	2.23599	1.57992	-1.55614	-1.93357	-2.01668		Gohir.A03G053700.1	-0.483829	-0.754011	-0.543772	0.273541	0.859744	0.648327
Gohir.A09G219200.1	0.914355	1.41898	1.15313	-1.45007	-0.926686	-1.1097		Gohir.D04G033100.3	-1.03428	-1.26854	-0.73585	0.848624	1.17605	1.014
Gohir.D13G136800.1	1.35445	0.746966	0.85118	-0.241578	-0.978423	-1.73259		Gohir.D08G018300.1	-1.0596	-1.63712	-1.1193	1.22897	1.31294	1.2741
Gohir.D07G142066.1	0.76113	0.802668	0.516639	-0.634685	-0.784804	-0.660948		Gohir.D11G198200.2	-0.662164	-0.662164	-0.662164	0.313099	0.78515	0.888244
Gohir.A12G156600.1	1.18919	1.33595	1.06168	-1.58907	-1.38753	-0.610226		Gohir.D11G093800.1	-0.882107	-1.88522	-2.20403	1.52728	1.68549	1.7586
Gohir.D13G203300.1	0.394531	0.613722	0.480756	-0.421669	-0.481409	-0.585932		Gohir.D02G156200.1	-0.268017	-1.04191	-1.19381	0.582702	0.976328	0.944706
Gohir.D01G135100.1	0.476328	0.823855	0.184294	-0.522011	-0.619333	-0.343133		Gohir.A12G193800.1	-0.422369	-0.421013	-0.375675	-0.0388593	0.587092	0.670825
Gohir.A10G063900.1	0.454562	1.38482	1.1635	-0.878198	-0.98382	-1.14086		Gohir.D07G164700.1	-0.675386	-0.720268	-0.499409	0.547563	0.642377	0.705123
Gohir.D05G097000.1	1.95166	1.0347	1.21005	-1.54637	-1.36702	-1.28302		Gohir.D04G009100.1	-0.824946	-1.09012	-1.32102	0.923116	1.25546	1.05751
Gohir.D10G111900.2	1.22343	0.915087	0.267273	-0.758408	-0.516191	-1.13119		Gohir.A10G098400.1	-1.04507	-0.871991	-0.824848	0.6861	0.762554	1.29326
Gohir.A11G079800.1	1.53893	0.573803	1.49129	-1.16147	-1.34952	-1.09304		Gohir.A08G210500.1	-1.14857	-1.73483	-1.83905	0.189778	2.22376	2.30891
Gohir.D05G084100.1	0.939668	1.55135	1.32766	-1.68128	-1.07739	-1.06001		Gohir.D05G061200.1	-1.70788	-1.32833	-0.744444	0.454787	1.81144	1.51442
Gohir.D11G181700.1	1.43142	0.711414	0.0282107	-0.723681	-0.723681	-0.723681		Gohir.A13G007000.1	-1.60817	-1.76434	-1.58422	0.492063	2.49165	1.97302
Gohir.A10G081100.1	0.77254	0.745804	0.561143	-0.729281	-0.729281	-0.620924		Gohir.A12G238400.1	-0.823199	-1.38027	-1.31373	0.480718	1.36546	1.67102
Gohir.A12G222400.1	0.857219	0.798734	0.889824	-0.828962	-1.02052	-0.69629		Gohir.D07G198200.1	-1.05205	-1.30618	-1.25149	0.283965	1.83374	1.49201
Gohir.D06G160600.1	-0.00717012	1.4134	1.8396	-1.1465	-0.868283	-1.23104		Gohir.A02G107700.1	-0.659274	-0.497064	-0.659274	0.883232	0.504869	0.42751
Gohir.D02G085900.1	1.11247	1.10497	1.36961	-0.889225	-1.49146	-1.20637		Gohir.A10G221400.1	-0.393676	-0.448571	-0.568627	0.693911	0.460293	0.256671
Gohir.D11G346700.1	0.948768	1.15613	0.790083	-0.655615	-1.14652	-1.09284		Gohir.D10G105600.1	-0.318241	-0.60433	-0.710008	0.319974	0.38895	0.923655
Gohir.A07G125950.1	0.63762	1.01332	0.870514	-0.88061	-0.697148	-0.943695		Gohir.D01G129300.1	-0.485623	-1.00129	-1.30415	1.05756	0.899661	0.833847
Gohir.A04G012442.1	1.14325	1.09801	0.401737	-0.852786	-1.20328	-0.586926		Gohir.A09G187300.1	-1.82474	-1.82474	-1.82474	1.33004	1.33425	2.80992
Gohir.A03G190300.1	0.631082	0.420282	0.4357	-0.244345	-0.773787	-0.468933		Gohir.D08G147400.1	-0.893272	-1.55589	-0.760087	1.14354	1.08439	0.981322
Gohir.D07G223400.1	0.906235	0.533962	0.359775	-0.423692	-0.648435	-0.727845		Gohir.A10G043150.1	-1.13888	-1.13888	-1.13888	0.321601	1.53037	1.56466
Gohir.A09G112350.1	0.998747	0.910157	0.693854	-0.821124	-0.989169	-0.792464		Gohir.D05G091700.1	-0.278059	-0.613076	-0.595813	0.573976	0.573976	0.338997
Gohir.D05G360100.1	0.726661	1.49368	1.27742	-0.711668	-1.46064	-1.32545		Gohir.A07G221900.1	-0.735319	-2.42384	-1.43932	1.37239	1.59935	1.62675
Gohir.A10G015800.1	0.4811	1.22713	1.03843	-1.05344	-0.807973	-0.885246		Gohir.D01G175500.1	-0.586096	-0.956181	-1.30977	0.575058	1.19965	1.07733
Gohir.D06G060201.1	0.849495	1.22679	1.07709	-1.51217	-0.842394	-0.79881		Gohir.D02G046600.1	-0.650324	-1.0829	-0.721791	1.3324	0.574922	0.547694
Gohir.A07G098800.1	1.7639	1.00197	0.581942	-0.722606	-1.61353	-1.01168		Gohir.D13G070900.3	-0.468757	-1.19427	-1.58837	0.740333	1.41148	1.09958
Gohir.D07G203100.1	0.547775	1.24085	1.30628	-0.753471	-1.14583	-1.1956		Gohir.D05G019200.1	-0.372184	-1.40939	-0.826147	0.762813	1.19514	0.649773
Gohir.D05G246200.1	0.229352	1.12395	0.915145	-0.756149	-0.756149	-0.756149		Gohir.D09G018400.1	-0.347129	-0.717756	-0.794588	0.701359	0.570265	0.587851
Gohir.A05G003800.3	0.477934	1.46346	1.17267	-1.38273	-1.00892	-0.722418		Gohir.D05G268700.1	-0.949708	-1.45775	-0.716396	1.38406	0.901386	0.838413
Gohir.A05G174100.1	1.06716	1.00359	0.844887	-0.649801	-0.970201	-1.29563		Gohir.A13G165600.1	-0.353099	-1.31544	-1.14691	0.950405	0.875061	0.989983
Gohir.A11G068900.1	0.725425	0.724369	0.925482	-1.01307	-0.689965	-0.672245		Gohir.A05G370200.2	-1.57038	-1.57038	-1.57038	2.85078	0.274009	1.58634
Gohir.A09G238200.1	-0.0402197	1.64806	1.58222	-1.16551	-1.00076	-1.02379		Gohir.D08G188400.1	-0.676155	-0.755789	-0.537478	0.794015	0.570351	0.605057
Gohir.A06G199500.1	0.70636	0.791001	0.346973	-0.547778	-0.544825	-0.75173		Gohir.D07G003200.1	-0.170773	-1.71269	-1.25266	1.33913	0.88088	0.916119
Gohir.A03G177900.1	1.35472	0.978715	0.862846	-0.689714	-1.03494	-1.47163		Gohir.A13G234600.1	-0.633865	-0.444624	-0.632683	0.549661	0.531849	0.629662
Gohir.A05G293300.1	0.329702	0.646545	0.623126	-0.59032	-0.64414	-0.364912		Gohir.D09G204400.1	-0.566178	-0.633192	-0.865576	0.921585	0.580799	0.562561
Gohir.A05G139200.1	0.0847232	1.22817	0.856576	-0.74417	-0.841872	-0.583427		Gohir.A01G194100.1	-0.749042	-1.62669	-0.960894	1.18844	1.22933	0.918858
Gohir.A05G408700.1	0.00358213	1.27793	1.56991	-0.888915	-0.846577	-1.11593		Gohir.A10G232150.1	-0.905222	-0.905222	-0.905222	1.80605	1.81484	-0.905222
Gohir.A13G183500.1	1.23292	1.44673	1.12721	-0.615701	-1.69466	-1.4965		Gohir.D05G046400.1	-0.378256	-2.14925	-2.18673	1.15643	1.92652	1.63128
Gohir.A05G153200.1	1.42693	1.3575	1.15709	-1.50391	-1.22913	-1.20849		Gohir.A05G303100.1	-0.632087	-1.51531	-1.29002	1.02345	1.20696	1.20701
Gohir.A05G235600.1	1.28069	1.27767	1.28611	-1.09102	-1.43225	-1.3212		Gohir.A08G108900.1	-0.671346	-0.976889	-1.00475	0.932627	0.866062	0.854294
Gohir.D08G221400.1	0.501131	1.91489	1.56796	-1.05362	-1.34026	-1.5901		Gohir.D13G047100.2	-0.391222	-0.600363	-0.600363	0.435964	0.394579	0.761405
Gohir.D04G021800.1	0.468097	1.16804	1.62675	-1.21195	-1.01638	-1.03455		Gohir.D07G229400.1	-0.628955	-1.25722	-1.93417	0.219656	1.95438	1.64631
Gohir.A11G019700.1	1.98403	1.41791	-0.0380858	-0.916	-0.891228	-1.55662		Gohir.D09G250166.1	-1.32802	-1.32802	-1.32802	1.71199	0.89014	1.38193
Gohir.A11G155100.1	-0.109532	1.09455	1.22086	-0.389228	-0.811621	-1.00503		Gohir.D09G170400.1	-0.321175	-1.12364	-0.937653	1.03117	0.724141	0.627163
Gohir.A01G036500.1	0.0261446	0.689605	0.750915	-0.356478	-0.515435	-0.594752		Gohir.D05G142000.1	-0.859616	-0.826863	-1.66036	0.997737	1.17657	1.17253
Gohir.A10G001450.1	0.795916	0.845998	0.4408	-0.666337	-0.681326	-0.73505		Gohir.D08G200100.1	-0.35319	-0.578957	-0.534961	0.675181	0.281106	0.510822
Gohir.D09G111000.1	0.364451	1.27077	1.21353	-0.753759	-1.08098	-1.01401		Gohir.A10G176400.1	-0.931034	-1.73448	-1.77996	1.40148	1.58614	1.45785
Gohir.A11G099200.1	0.993446	0.618829	0.272616	-0.874963	-0.441849	-0.56808		Gohir.D10G149700.1	-1.01998	-1.14203	-0.519502	1.00304	0.844038	0.834445
Gohir.D02G044200.1	0.713971	0.553479	0.511855	-0.426657	-0.738252	-0.614396		Gohir.A09G059050.1	-1.01073	-1.01073	-1.01073	1.05656	1.02031	0.955328
Gohir.D02G098300.1	0.125857	0.604439	0.576731	-0.413763	-0.355577	-0.537687		Gohir.D02G143200.1	-1.43176	-1.11644	-0.460587	1.22653	0.986875	0.795386
Gohir.A02G103500.1	2.13289	0.307432	0.241926	-0.975304	-0.975304	-0.731635		Gohir.A11G043200.2	-0.186701	-0.759581	-0.833643	0.519568	0.783641	0.476717
Gohir.A12G236500.1	0.970581	1.6639	1.31942	-0.275877	-0.951712	-2.72631		Gohir.D03G067100.1	-0.532775	-0.926046	-0.378295	0.665164	0.825498	0.346454
Gohir.A07G009200.1	0.633257	0.859862	0.622179	-0.905395	-0.675747	-0.534155		Gohir.A05G194400.1	-0.853021	-1.65739	-1.07776	0.952673	1.31114	1.32436
Gohir.A09G089100.1	1.92377	0.87556	0.363922	-1.46967	-0.679315	-1.01427		Gohir.A02G017001.1	-0.633396	-0.633396	-0.633396	0.210588	1.11635	0.573247
Gohir.D02G051100.1	1.27276	0.98854	1.09127	-1.32251	-1.06429	-0.965777		Gohir.D07G016700.1	-0.435762	-0.644903	-0.644903	0.129093	1.10913	0.487345
Gohir.A05G107200.1	0.502144	0.742849	1.07721	-0.754985	-0.970166	-0.597053		Gohir.A10G233500.1	-0.380117	-0.993181	-0.664685	1.17333	0.521221	0.343428
Gohir.D04G172800.1	0.385324	1.11503	0.835276	-0.588193	-0.852394	-0.895038		Gohir.D11G284000.1	-0.562033	-1.10048	-1.22738	0.837268	0.96966	1.08297
Gohir.A01G091300.1	0.825719	1.28869	0.669295	-0.68539	-1.36766	-0.730653		Gohir.A10G117500.1	-0.610355	-1.41049	-0.786268	0.675789	1.13008	1.00124
Gohir.A03G124700.2	1.67708	0.516528	0.386363	-0.716831	-1.08317	-0.779972		Gohir.D05G185100.1	-0.665033	-1.76176	-1.83758	1.12422	1.52486	1.61529
Gohir.A05G196900.1	0.965338	0.684964	1.3031	-1.21002	-0.84564	-0.897737		Gohir.A05G086066.1	-0.272726	-0.560962	-0.543601	0.29336	0.658933	0.424997
Gohir.D04G038700.1	0.405551	2.03922	1.89973	-0.553738	-1.88071	-1.91006		Gohir.D10G095100.1	-0.928323	-2.90645	-2.00092	1.26263	2.25028	2.32278
Gohir.D13G017400.1	0.554641	1.75087	1.82447	-1.39731	-1.22799	-1.50468		Gohir.A11G094700.1	-1.30592	-1.54884	-1.09238	0.71017	1.60662	1.63035
Gohir.A04G109464.1	1.2751	0.563147	0.603561	-0.678731	-0.788632	-0.974444		Gohir.D07G021800.2	-0.562031	-0.562031	-0.562031	0.690143	0.730162	0.265788
Gohir.A09G064900.1	0.903806	0.992718	1.09995	-0.865223	-0.959188	-1.17207		Gohir.A02G167901.1	-0.302728	-0.494535	-0.478535	0.367693	0.350628	0.557477
Gohir.D07G225300.1	-0.12875	1.66317	1.44137	-1.07738	-1.0294	-0.869013		Gohir.D13G005300.1	-0.617276	-0.901434	-1.07776	0.922965	1.00495	0.668556
Gohir.D07G005800.1	1.28295	1.79119	1.42039	-1.61716	-1.36073	-1.51666		Gohir.A08G247900.1	-0.446002	-0.968562	-1.19884	0.375791	1.06344	1.17417
Gohir.A10G216400.1	0.66978	2.16476	1.37212	-0.933061	-2.07456	-1.19904		Gohir.A08G098500.2	-0.966679	-1.7712	-1.41535	1.42639	1.49383	1.23301
Gohir.A08G203400.1	0.526576	1.56644	1.41939	-1.13176	-1.10072	-1.27993		Gohir.A08G117900.1	-0.529731	-0.529731	-0.529731	-0.0371085	0.907497	0.718804
Gohir.D06G130000.1	1.77025	1.06323	1.39834	-1.12429	-1.5827	-1.52483		Gohir.A05G283000.1	-0.501878	-0.922657	-0.810315	0.654317	1.59265	-0.0121129
Gohir.D05G141900.1	1.37403	0.357092	0.367917	-0.514006	-0.858239	-0.726795		Gohir.A11G210433.1	-0.532352	-0.499124	-0.483443	0.811195	0.573891	0.129834
Gohir.A04G132400.1	0.307897	0.672291	0.794008	-0.50683	-0.593616	-0.67375		Gohir.D01G066801.1	-1.34079	-2.7165	-2.26988	1.36374	2.52557	2.43786
Gohir.A05G162200.1	0.220545	1.24892	1.24821	-1.15836	-0.721378	-0.837944		Gohir.A07G034736.1	-0.627438	-1.73446	-1.45945	1.11013	1.58372	1.1275
Gohir.A11G188100.1	0.602344	1.92817	1.56268	-1.35606	-1.52139	-1.21573		Gohir.A12G045300.3	-0.455966	-0.53348	-0.445939	0.408981	0.510311	0.516093
Gohir.D07G226200.1	1.78615	1.35843	1.16942	-1.23047	-1.57878	-1.50475		Gohir.A05G292900.1	-1.22296	-0.676822	-0.410699	0.143224	1.17537	0.991883
Gohir.D02G220800.2	1.33421	1.2104	0.8039	-0.681072	-1.4471	-1.22034		Gohir.D06G212650.1	-0.392546	-0.450894	-0.489871	0.656641	0.375299	0.301372
Gohir.D09G152300.1	1.00057	0.907853	1.01429	-1.10815	-1.2051	-0.609472		Gohir.D05G306600.1	-0.840744	-1.42606	-0.868401	0.800468	1.11159	1.22314
Gohir.D05G264100.1	0.668327	0.629578	0.696123	-0.646298	-0.759922	-0.587809		Gohir.A04G056300.1	-0.899153	-1.31888	-1.30145	0.212069	1.4239	1.88352
Gohir.A02G114300.2	0.54806	0.87233	0.647648	-0.976478	-0.518273	-0.573287		Gohir.A03G000048.1	-0.239693	-0.542372	-0.52676	0.43751	0.362519	0.508795
Gohir.A06G033400.1	0.637394	1.13406	1.1662	-1.12785	-0.708194	-1.10161		Gohir.D04G175172.1	-0.542958	-1.13176	-1.13176	1.31951	0.61369	0.873278
Gohir.A11G327700.1	0.5995	1.42613	1.17765	-0.463373	-1.46818	-1.27172		Gohir.D08G199000.1	-1.36265	-2.07833	-1.14911	1.12478	2.04082	1.42449
Gohir.A09G133900.1	0.378084	1.10991	0.789546	-0.333679	-0.883459	-1.0604		Gohir.D10G110400.1	-0.388908	-1.67083	-0.854692	0.353212	1.28572	1.2755
Gohir.D06G122600.1	0.836101	1.06109	0.744202	-0.828598	-0.786187	-1.0266		Gohir.D07G126100.1	-0.647576	-2.01235	-1.80228	1.35157	1.71269	1.39794
Gohir.A13G101900.1	0.562299	1.34466	1.059	-0.647512	-0.997876	-1.32057		Gohir.D06G197200.1	-0.997798	-0.989034	-0.733446	0.569473	1.01859	1.13221
Gohir.A13G167800.1	0.429548	1.72755	1.55738	-1.25919	-1.16492	-1.29037		Gohir.A01G178300.1	-0.174726	-0.545448	-0.545448	0.313727	0.491583	0.460311
Gohir.A03G007100.1	0.32322	1.09739	1.18399	-0.811696	-0.659843	-1.13306		Gohir.A09G235000.1	-0.532376	-1.56165	-1.52418	0.92621	1.40446	1.28754
Gohir.A12G212400.1	0.917416	1.58714	1.49054	-0.879265	-1.75526	-1.36058		Gohir.A07G132900.1	-0.501858	-0.699724	-0.411661	0.268183	0.784156	0.560904
Gohir.D08G176400.1	1.50184	0.348773	0.741071	-0.889162	-1.05171	-0.650809		Gohir.A05G291150.1	-1.91315	-1.91315	-1.91315	1.24162	2.71946	1.77838
Gohir.D09G116300.1	1.84087	1.45824	1.40846	-1.75829	-1.61831	-1.33097		Gohir.A12G240900.1	-0.235341	-1.07067	-1.30459	0.746648	0.925273	0.938682
Gohir.A11G266300.1	0.476701	0.897998	0.721564	-0.5336	-0.700226	-0.862436		Gohir.D11G200500.1	-0.530181	-1.66325	-1.26141	1.2736	1.07402	1.10722
Gohir.D10G245100.1	4.55213	2.02825	1.59136	-2.55924	-2.81808	-2.79443		Gohir.D05G321000.1	-0.985672	-1.44722	-0.969411	1.07727	1.31084	1.01419
Gohir.D13G041300.2	0.401413	1.16916	1.23224	-0.777355	-1.00769	-1.01776		Gohir.A04G109200.1	-0.763169	-1.30716	-1.30716	0.937727	1.39106	1.0487
Gohir.D01G072800.1	0.809084	1.08711	0.540755	-0.839012	-0.873237	-0.724701		Gohir.A10G107000.2	-0.444321	-0.518584	-0.339636	0.32839	0.560663	0.413488
Gohir.D02G011150.1	0.92671	1.07756	1.07995	-1.03993	-1.08625	-0.958044		Gohir.D07G108600.2	-0.319227	-0.43694	-0.535031	0.261845	0.536904	0.492449
Gohir.A02G031301.1	-0.0388329	0.978189	1.05769	-0.729198	-0.511348	-0.756498		Gohir.A03G184700.1	-0.575904	-0.297647	-0.434632	0.262559	0.564798	0.480825
Gohir.D11G311680.1	-0.0126465	0.754383	0.988384	-0.649389	-0.549284	-0.531448		Gohir.D07G100400.1	-0.749214	-1.31168	-1.54359	1.07349	1.32856	1.20243
Gohir.D10G218300.1	1.30333	0.824871	0.0474586	-0.773805	-0.769677	-0.632174		Gohir.D03G007900.1	-0.437396	-0.911398	-1.0342	0.739592	0.834479	0.80892
Gohir.D06G065700.1	1.52414	1.00747	0.468425	-1.15731	-1.02112	-0.821601		Gohir.A06G146200.1	-0.65146	-1.25291	-1.31022	0.859367	1.32717	1.02806
Gohir.A03G162300.1	0.180704	0.840214	0.545022	-0.639495	-0.558449	-0.367995		Gohir.D11G346900.3	-1.01415	-1.43864	-0.684032	0.86114	1.10424	1.17144
Gohir.D13G201500.1	0.288044	0.871392	0.798072	-0.53238	-0.715591	-0.709537		Gohir.A08G010750.1	-1.55195	-1.96485	-1.72572	0.946764	2.39892	1.89684
Gohir.D12G212200.1	1.85572	0.381158	0.474077	-0.857989	-0.832941	-1.02003		Gohir.A13G071600.1	-0.591451	-0.599508	-0.633372	0.154439	0.836868	0.833024
Gohir.D13G169400.1	0.668562	1.48949	0.875816	-0.640205	-1.26487	-1.1288		Gohir.A13G218300.1	-0.365826	-0.511628	-0.385774	0.496087	0.470861	0.29628
Gohir.D03G061400.1	1.91715	0.622886	1.00276	-1.56135	-0.957899	-1.02354		Gohir.D11G060100.1	-0.501163	-0.730522	-0.685155	0.7462	0.538204	0.632436
Gohir.D10G175900.1	1.8241	1.06969	1.10921	-1.12685	-1.60418	-1.27197		Gohir.A01G022475.1	-0.712868	-1.01049	-1.51612	0.568207	1.45699	1.21427
Gohir.D05G155800.1	0.311008	1.20126	0.976949	-1.26362	-0.949125	-0.276477		Gohir.D04G152500.1	-1.02934	-1.46976	-1.46976	0.309706	1.68599	1.97318
Gohir.D08G064700.1	0.683748	0.999772	0.710613	-0.534683	-1.04511	-0.814337		Gohir.D01G190900.1	-0.416568	-0.443823	-0.714053	0.962665	0.112953	0.498827
Gohir.D03G012600.1	1.39219	1.03603	0.775893	-0.992585	-1.15994	-1.05159		Gohir.D06G109000.2	-0.431706	-0.775559	-0.745743	0.367715	0.43145	1.15384
Gohir.A05G080000.3	-0.34516	1.42706	1.67229	-0.633648	-1.35874	-0.761807		Gohir.A05G094400.1	-0.690447	-0.929019	-0.919004	0.274265	1.18293	1.08127
Gohir.A07G150800.2	1.39281	1.10136	1.22209	-2.17653	-0.747185	-0.792546		Gohir.D13G228000.1	-0.899518	-2.06142	-1.03715	1.08407	1.50267	1.41134
Gohir.D10G175600.1	1.58186	1.08117	1.13648	-1.19763	-1.28293	-1.31895		Gohir.D12G116600.2	-0.249663	-1.95991	-1.00311	1.04089	1.13177	1.04003
Gohir.D09G024400.1	0.704492	0.38922	0.702312	-0.394111	-0.700956	-0.700956		Gohir.D10G088300.1	-0.771528	-0.771528	-0.771528	1.04732	0.134593	1.13267
Gohir.D01G179700.1	2.50773	2.22617	0.983969	-1.69938	-2.12616	-1.89232		Gohir.A11G037800.1	-0.556741	-1.12432	-1.30713	1.33432	1.16683	0.487035
Gohir.A03G195200.1	2.73046	1.51362	1.40553	-1.3845	-2.2464	-2.01871		Gohir.D04G135100.1	-0.879716	-1.3278	-0.458307	1.11319	0.846928	0.705707
Gohir.D02G006600.1	1.13374	1.67509	1.22237	-0.929154	-1.75848	-1.34357		Gohir.D12G104700.1	-0.744871	-0.937141	-1.15438	0.225555	1.47308	1.13776
Gohir.D10G175700.1	4.45886	1.05299	1.36176	-2.21813	-2.41178	-2.24371		Gohir.D05G152800.1	-0.71243	-1.26379	-0.957835	0.104606	1.32033	1.50912
Gohir.D02G185400.2	0.633705	0.722141	0.564185	-0.500917	-0.789699	-0.629414		Gohir.D11G154350.1	-0.624378	-1.00281	-0.344415	0.231016	0.801025	0.93956
Gohir.D03G144500.1	4.11899	1.11816	0.802663	-2.03641	-2.09423	-1.90918		Gohir.A10G065600.2	-0.403256	-0.553815	-0.553815	0.0951103	0.727141	0.688635
Gohir.A05G061200.1	0.249338	1.53514	1.80947	-1.57506	-0.834754	-1.18413		Gohir.D12G234501.1	-0.376592	-1.61273	-1.2836	1.22541	0.954417	1.09309
Gohir.A03G017240.1	3.84508	1.86636	1.64462	-1.57695	-3.11733	-2.66178		Gohir.A05G018100.1	-1.86611	-0.756324	-0.530783	0.376787	1.17826	1.59817
Gohir.A09G120200.1	3.86787	1.95135	1.66916	-2.84703	-2.23677	-2.40457		Gohir.D05G080100.1	-0.385775	-1.25305	-0.593487	0.721609	0.542639	0.968062
Gohir.A05G021600.1	0.332228	1.61928	1.50113	-0.945351	-1.35079	-1.15649		Gohir.A08G040700.1	-0.489861	-0.743245	-0.743245	0.55424	0.882026	0.540084
Gohir.D04G149400.1	1.07469	0.810425	0.630702	-0.549531	-0.909404	-1.05688		Gohir.D12G219400.1	-0.643857	-0.755837	-0.738476	0.598559	0.508361	1.03125
Gohir.A12G251600.1	0.317338	1.40755	1.58877	-1.4714	-0.862525	-0.979734		Gohir.A11G008300.1	-0.642417	-1.05288	-0.980044	0.623217	1.00249	1.04964
Gohir.A03G013500.1	1.19753	1.89206	1.7329	-1.59479	-1.79617	-1.43154		Gohir.D02G239700.2	-1.15583	-1.71826	-1.81349	1.117	1.64225	1.92833
Gohir.A11G216400.4	1.3267	0.704702	0.493341	-0.848748	-0.986128	-0.689871		Gohir.D09G052978.1	-0.606097	-1.35044	-1.25148	1.50751	0.895537	0.804972
Gohir.A05G204400.1	3.48092	2.23358	2.25825	-2.54727	-3.06365	-2.36182		Gohir.A09G137600.1	-0.507293	-0.91418	-0.840247	0.742569	0.744715	0.774436
Gohir.D09G040600.1	0.710072	0.498301	0.198108	-0.293994	-0.547085	-0.565402		Gohir.D10G231700.1	-0.448601	-1.79283	-1.05612	1.40046	0.87383	1.02326
Gohir.D08G097200.2	0.957967	1.35174	0.893364	-0.595547	-1.00461	-1.60292		Gohir.A07G230300.1	-0.635438	-0.724937	-0.588745	0.171916	0.914296	0.862908
Gohir.D07G034100.1	0.827337	0.509868	0.739299	-0.560695	-0.82446	-0.691349		Gohir.D12G005600.1	-0.729509	-0.948368	-0.891695	0.153527	1.16359	1.25245
Gohir.D08G021400.2	0.524166	1.48949	1.18649	-1.05794	-1.00857	-1.13363		Gohir.D05G134600.1	-0.442179	-2.03883	-1.79057	1.97059	1.20985	1.09113
Gohir.D01G180400.1	0.936519	1.11113	0.909057	-0.962224	-0.978738	-1.01575		Gohir.D05G105000.1	-0.587245	-1.323	-0.956147	1.15594	0.747961	0.962492
Gohir.A12G107700.2	0.278518	1.25268	0.706612	-0.725234	-0.767165	-0.745412		Gohir.A07G043800.1	-0.830826	-2.0475	-2.63118	1.20487	2.16475	2.13988
Gohir.A11G252700.1	2.00376	0.636155	0.236776	-0.779475	-1.11444	-0.982782		Gohir.A07G002800.1	-0.579456	-1.26362	-1.46999	1.01451	1.20044	1.09812
Gohir.A12G017200.2	0.0946944	1.10348	0.879828	-0.477261	-0.880005	-0.720735		Gohir.D05G119100.1	-1.72489	-1.28784	-0.501758	1.03063	1.17208	1.31179
Gohir.D06G171051.1	0.448878	1.42578	1.46627	-0.689749	-1.3885	-1.26268		Gohir.A02G018300.1	-0.499892	-1.57799	-1.42694	1.49263	0.950158	1.06203
Gohir.D12G256100.2	1.35629	0.861623	0.965882	-1.06005	-1.08387	-1.03987		Gohir.D06G073800.1	-0.788699	-0.913697	-0.902329	0.629423	0.965165	1.01014
Gohir.A02G007500.1	0.771215	1.065	1.0275	-0.918145	-0.950155	-0.995417		Gohir.D11G163600.1	-1.40347	-1.65978	-0.431897	0.488821	1.21372	1.79261
Gohir.A05G104400.1	0.0274941	1.32038	1.92221	-1.36534	-0.941211	-0.963531		Gohir.D08G158500.1	-1.00521	-1.09913	-1.75426	1.07583	1.25801	1.52476
Gohir.A05G126300.1	0.359443	1.04023	1.09416	-0.64216	-0.855039	-0.996637		Gohir.D10G201000.1	-0.631122	-1.51116	-1.6505	0.91259	1.48694	1.39324
Gohir.A05G019800.3	0.630077	1.87823	1.59381	-1.06748	-1.5282	-1.50644		Gohir.D02G206300.1	-0.592209	-1.22828	-1.16098	0.89367	0.930271	1.15753
Gohir.D10G124400.1	1.52746	1.15137	1.18628	-1.39488	-1.46364	-1.00659		Gohir.A07G048600.1	-0.534163	-0.739563	-0.767423	0.624831	0.684317	0.732001
Gohir.D06G123500.1	0.824468	1.02007	1.07681	-0.818846	-0.927774	-1.17473		Gohir.D10G198000.1	-0.589311	-1.53449	-1.13612	0.960759	1.20461	1.09455
Gohir.D01G016984.1	0.823943	1.16371	1.19344	-0.794411	-1.15544	-1.23125		Gohir.A02G127600.1	-0.928625	-1.10562	-0.92722	1.10141	1.03395	0.826099
Gohir.D13G037300.1	0.504528	1.4337	0.761573	-1.01525	-1.09516	-0.58939		Gohir.D03G019600.1	-0.403785	-1.21276	-1.28138	0.731158	1.22501	0.941765
Gohir.D01G179500.2	-0.490176	1.26222	1.68138	-0.807916	-0.950657	-0.694854		Gohir.A01G133200.5	-0.179253	-1.42491	-1.09245	0.941461	0.913038	0.842113
Gohir.D01G036600.1	0.596739	0.855598	0.629716	-0.587591	-0.622356	-0.872105		Gohir.D01G217300.1	-0.681424	-1.14541	-1.50616	0.851604	1.14763	1.33377
Gohir.A13G038800.1	0.942428	1.39899	0.80896	-0.670963	-1.51319	-0.966223		Gohir.D05G134500.1	-0.738975	-1.02287	-0.564227	1.06193	0.61129	0.652853
Gohir.A06G145200.1	0.423265	0.344625	1.0559	-0.419193	-0.656386	-0.748215		Gohir.D06G037100.1	-0.473875	-0.839855	-0.489213	0.622479	0.682745	0.497718
Gohir.D05G023700.1	1.82849	1.29995	0.955344	-0.975403	-1.60313	-1.50524		Gohir.D03G064000.1	-0.394812	-0.648197	-0.648197	0.802289	0.470163	0.418754
Gohir.D08G069800.1	1.17043	0.474212	0.288573	-0.520809	-0.615434	-0.796967		Gohir.A05G207300.1	-0.433776	-0.818382	-0.606193	0.256953	0.6883	0.913098
Gohir.A13G160800.1	0.934175	1.13005	0.312586	-1.0258	-0.933328	-0.417681		Gohir.A09G030400.1	-1.08624	-1.61253	-1.54286	1.68171	1.515	1.04493
Gohir.A04G104100.1	0.118527	0.942951	1.58837	-1.10638	-0.818407	-0.725062		Gohir.A11G057350.1	-0.984106	-1.87822	-0.795361	1.4393	1.02262	1.19577
Gohir.A05G108200.1	-0.279288	1.2949	1.05254	-0.748066	-0.563081	-0.757007		Gohir.A09G213658.1	-0.688113	-0.724232	-0.553254	0.201411	1.05321	0.710983
Gohir.A10G226800.2	-0.0330628	0.998793	1.29932	-0.497243	-0.753841	-1.01397		Gohir.D03G081100.2	-0.470741	-1.10281	-0.646129	1.06885	0.699184	0.451646
Gohir.A12G217100.1	1.62162	0.899788	1.29107	-1.17917	-1.40954	-1.22377		Gohir.D04G053700.1	-1.18425	-0.758735	-0.512601	0.335524	0.90874	1.21133
Gohir.D08G224700.1	0.0942691	1.25415	1.01303	-0.581588	-0.939949	-0.839909		Gohir.A09G142900.1	-1.15079	-1.5886	-1.40129	0.722802	1.61009	1.80778
Gohir.1Z049314.1	2.93658	1.57571	1.85065	-2.35166	-1.93154	-2.07974		Gohir.D13G228200.1	-0.375566	-0.606999	-0.560158	0.481821	0.485209	0.575694
Gohir.A13G190400.1	0.970244	1.06913	0.969443	-0.958808	-1.11268	-0.937336		Gohir.D08G160900.1	-1.08397	-0.730913	-0.811019	0.733637	1.29355	0.598713
Gohir.A09G072800.2	1.17694	1.44179	1.64295	-1.797	-1.34772	-1.11695		Gohir.D01G038500.1	-0.970484	-0.897584	-0.823217	0.685286	1.05675	0.949251
Gohir.D11G039300.1	1.29515	1.28834	1.1476	-1.27254	-1.19192	-1.26663		Gohir.A08G071200.1	-0.838014	-0.501124	-0.462264	0.253322	0.67175	0.87633
Gohir.A13G054300.1	1.30818	1.48455	1.03027	-1.28606	-1.24154	-1.2954		Gohir.D12G143800.1	-0.359354	-0.636654	-0.814548	0.745163	0.593996	0.471396
Gohir.D08G208900.1	0.220079	0.276577	1.28296	-0.519105	-0.661549	-0.598958		Gohir.A02G122700.1	-0.476557	-1.3462	-0.755551	1.06756	0.461965	1.04879
Gohir.D05G211500.1	0.846067	0.644752	0.0426878	-0.603503	-0.52256	-0.407444		Gohir.A05G254400.1	-0.86452	-1.08709	-0.857097	0.199426	1.68402	0.925263
Gohir.A05G198600.1	0.854723	1.40935	1.08111	-0.549918	-1.44932	-1.34595		Gohir.A06G098212.1	-0.919605	-0.804128	-0.384172	0.16017	1.25456	0.693177
Gohir.D05G156400.1	-0.183617	1.02317	0.762784	-0.534114	-0.534114	-0.534114		Gohir.D06G037700.2	-1.06205	-1.89145	-1.375	1.29044	1.55245	1.4856
Gohir.D05G020900.1	0.129961	1.24945	1.28507	-0.923251	-0.764177	-0.977058		Gohir.D07G129500.1	-0.41222	-2.25779	-2.42953	1.81753	1.53277	1.74924
Gohir.A05G353900.2	1.1211	0.0317481	0.422051	-0.500083	-0.430858	-0.643958		Gohir.D05G206500.1	-0.348931	-0.638723	-0.828384	0.538617	0.585461	0.69196
Gohir.D09G047100.1	1.22702	1.34137	0.87709	-1.07048	-1.31129	-1.06371		Gohir.A11G021700.1	-0.590465	-1.55873	-1.45173	0.964781	1.31733	1.31881
Gohir.D04G129300.1	0.898786	0.37496	0.307268	-0.441829	-0.532233	-0.606953		Gohir.D01G096600.1	-0.429145	-0.95145	-0.935768	0.789452	0.77006	0.756852
Gohir.A06G146000.1	1.48171	0.748696	0.421857	-0.894119	-0.842975	-0.91517		Gohir.A05G414900.1	-0.649755	-0.922594	-0.951528	0.922458	0.823975	0.777445
Gohir.D07G099400.2	1.03284	0.404774	0.317344	-0.607012	-0.610243	-0.537699		Gohir.D12G202300.1	-0.341905	-0.504206	-0.289215	0.115256	0.593653	0.426417
Gohir.D13G037200.1	0.803953	1.65548	0.882131	-0.939708	-1.11632	-1.28554		Gohir.A04G079200.1	-1.11239	-2.24717	-2.17393	1.24978	2.31583	1.96787
Gohir.D04G161500.1	0.468787	1.86237	1.66793	-1.23802	-1.40343	-1.35763		Gohir.A07G046400.1	-0.301718	-1.47507	-1.01238	1.55377	0.683577	0.551824
Gohir.D03G162200.1	0.930013	1.14894	0.735031	-0.791266	-1.37651	-0.646201		Gohir.A01G222600.1	-0.345758	-0.911575	-1.04188	0.114961	1.19555	0.988702
Gohir.D10G239200.1	-0.360036	1.69214	1.43677	-0.793594	-0.966317	-1.00896		Gohir.D01G063600.1	-0.656023	-1.56117	-2.13572	1.6277	1.28863	1.43659
Gohir.D04G182050.1	1.30642	1.2232	0.99259	-0.7597	-1.59031	-1.17219		Gohir.A03G043600.1	-1.1877	-1.07096	-0.775063	0.543093	1.30025	1.19038
Gohir.D06G207800.2	0.201051	0.73846	0.620835	-0.686704	-0.57132	-0.302324		Gohir.D11G128300.1	-0.410253	-1.79256	-1.67084	1.46859	1.41882	0.986236
Gohir.D02G181400.1	2.94991	1.29095	0.5452	-1.4842	-1.56208	-1.73979		Gohir.D07G195400.1	-1.02675	-2.25286	-1.68408	1.92701	1.69298	1.3437
Gohir.D04G165201.1	1.25159	1.4214	0.921297	-1.218	-1.00409	-1.3722		Gohir.A12G266301.1	-0.287306	-1.39036	-0.911918	0.844788	0.982512	0.762287
Gohir.A08G212900.1	1.13245	1.82113	1.43118	-1.23147	-1.59016	-1.56313		Gohir.D12G213200.1	-0.628359	-0.859364	-0.783637	0.602421	0.798591	0.870348
Gohir.A11G014800.1	0.145006	1.40772	1.2895	-0.958224	-1.02426	-0.859746		Gohir.A05G060700.1	-0.255969	-0.903434	-0.678307	0.69289	0.677873	0.466947
Gohir.A05G379600.1	1.52154	1.37363	1.04128	-1.72009	-1.2205	-0.995873		Gohir.D05G021140.1	-0.681687	-0.681687	-0.330059	0.587944	0.538642	0.566847
Gohir.A08G163500.1	0.893896	1.51927	1.47137	-1.56327	-1.4018	-0.919473		Gohir.A09G227400.1	-0.515327	-0.97051	-1.32495	0.774936	0.906691	1.12916
Gohir.A08G071300.1	0.849903	1.5381	1.6966	-1.28356	-1.41147	-1.38956		Gohir.D09G088101.1	-1.33507	-1.04675	-0.76083	0.290133	1.50739	1.34513
Gohir.A05G119800.1	0.708391	2.12718	1.79329	-1.55936	-1.52069	-1.54882		Gohir.D06G204400.1	-0.594702	-1.03033	-1.05495	0.772551	0.921025	0.986406
Gohir.A02G072700.1	0.63182	1.42199	1.16374	-0.865372	-1.13191	-1.22028		Gohir.A01G044200.1	-0.564198	-0.677755	-0.939322	0.591869	0.714353	0.875053
Gohir.D13G203101.1	0.222715	0.807907	0.585972	-0.344147	-0.609423	-0.663024		Gohir.A06G024500.2	-0.884162	-1.04637	-0.910181	-0.0298758	1.46358	1.40701
Gohir.D06G144900.2	1.89552	1.39634	1.50176	-1.59787	-1.59787	-1.59787		Gohir.A05G358100.2	-0.481272	-0.52351	-0.780285	0.395872	0.831899	0.557296
Gohir.A05G390900.2	1.30911	1.14862	0.63302	-1.06037	-0.743098	-1.28729		Gohir.D13G118400.1	-0.725625	-1.23188	-0.66576	1.09947	0.947946	0.575845
Gohir.A03G212300.1	-0.0191916	1.46707	1.3716	-1.22172	-0.85467	-0.743082		Gohir.D02G178800.1	-0.396197	-2.4083	-2.23826	1.18838	2.02056	1.83381
Gohir.A11G127500.1	1.01065	0.79949	0.661174	-0.959626	-0.633307	-0.878387		Gohir.A03G003400.1	-0.789536	-1.22246	-1.00733	0.338259	1.37387	1.3072
Gohir.D06G115300.1	0.801555	0.844778	0.407508	-0.628022	-0.738796	-0.687023		Gohir.A03G006600.1	-0.540851	-1.15213	-0.718345	0.686436	0.789563	0.93533
Gohir.A09G189501.1	1.34122	0.981832	1.04592	-0.35145	-1.35855	-1.65897		Gohir.A07G222700.1	-0.843967	-1.49847	-1.2216	0.279913	1.87452	1.40961
Gohir.A07G120100.2	0.727313	1.52366	1.17748	-0.693699	-1.49609	-1.23866		Gohir.D13G010300.1	-0.396682	-2.0643	-2.01523	1.18412	1.67417	1.61792
Gohir.A05G127200.1	0.848844	1.41831	1.30778	-1.85875	-0.800085	-0.916101		Gohir.A04G136300.1	-0.774191	-2.06655	-1.9801	1.37676	1.79513	1.64896
Gohir.D05G082800.2	0.334988	1.54578	0.840794	-1.02053	-0.877698	-0.823334		Gohir.A10G036600.1	-0.886936	-2.3812	-0.745475	0.975367	1.53378	1.50446
Gohir.D11G308100.2	2.10313	0.61812	0.282517	-1.05297	-1.00327	-0.947529		Gohir.A06G101600.2	-0.679538	-1.13582	-1.22263	1.16307	1.02407	0.850847
Gohir.A05G074300.1	2.24725	1.4701	1.14188	-1.60497	-1.46739	-1.78687		Gohir.A05G251800.2	-0.361669	-1.2448	-1.26982	1.0233	0.99862	0.854368
Gohir.A12G068500.1	0.896506	1.37137	1.2306	-1.00138	-1.23396	-1.26313		Gohir.D07G000900.2	-0.195589	-0.597219	-0.597219	0.419277	0.467664	0.503086
Gohir.D10G055900.1	1.10607	0.351161	0.321231	-0.73024	-0.579706	-0.468512		Gohir.A10G098900.1	-0.674095	-1.14398	-1.14398	0.863573	1.10759	0.990897
Gohir.A08G011100.1	0.744633	1.47258	1.44268	-1.49292	-1.23385	-0.933125		Gohir.A07G184600.1	-0.78112	-0.78112	-0.78112	0.527474	0.871482	0.944403
Gohir.1Z049612.1	0.16661	0.844843	0.695691	-0.317276	-0.560327	-0.829541		Gohir.A07G095200.1	-0.611409	-0.946961	-0.683698	1.47771	0.521155	0.243201
Gohir.A05G060600.1	0.176092	0.997395	1.3311	-0.668219	-0.937284	-0.899089		Gohir.A02G175400.1	-0.855919	-0.648146	-1.05178	0.776733	1.03778	0.741333
Gohir.D05G178700.2	1.29901	0.399694	0.237523	-0.540927	-0.632823	-0.762477		Gohir.A11G262100.1	-0.783172	-0.893226	-0.349308	0.809107	0.644646	0.571952
Gohir.D08G254400.2	0.798467	1.09917	0.852896	-0.785312	-1.20204	-0.763178		Gohir.D03G112500.1	-0.722522	-1.14368	-1.14368	0.0440895	1.33063	1.63516
Gohir.A08G155900.2	1.34759	0.682963	0.397295	-1.07939	-0.966566	-0.381891		Gohir.A01G079600.1	-1.55023	-1.48881	-1.02924	0.852006	1.79454	1.42173
Gohir.D01G017012.1	0.934805	1.13886	1.20641	-0.752362	-0.911618	-1.61609		Gohir.A13G032800.1	-0.260061	-0.630783	-0.630783	0.704929	0.228391	0.588308
Gohir.D06G102100.1	0.801785	0.560886	0.998248	-0.85132	-0.808584	-0.701015		Gohir.D13G069300.1	-0.987067	-0.987067	-0.574557	0.555439	0.964894	1.02836
Gohir.D05G028700.3	0.509117	0.640843	0.913032	-0.510888	-0.874677	-0.677428		Gohir.A10G021800.1	-0.649337	-0.75928	-0.605646	0.581242	0.929901	0.50312
Gohir.D01G191100.1	1.79196	1.87326	1.51084	-1.46483	-1.69207	-2.01915		Gohir.A01G050300.1	-0.579668	-0.665611	-0.922386	0.527495	0.744691	0.895479
Gohir.A06G003300.1	-0.4333	1.46423	1.59513	-0.786937	-0.825678	-1.01345		Gohir.A10G227401.1	-0.853731	-1.54386	-0.983322	0.982496	1.09131	1.30711
Gohir.A03G158100.1	1.55682	0.959767	0.526185	-0.943817	-0.996974	-1.10198		Gohir.A03G014000.1	-0.786366	-0.786366	-0.786366	0.842641	0.800999	0.715456
Gohir.A07G020200.1	0.71715	1.21174	0.915699	-1.20572	-0.766343	-0.872528		Gohir.A04G086900.1	-0.487428	-0.633231	-0.805633	0.35974	0.809077	0.757475
Gohir.A05G052800.1	0.247342	1.25492	1.94483	-0.934051	-1.03957	-1.47347		Gohir.D07G166500.1	-0.568801	-0.492821	-0.624345	1.17693	0.485876	0.0231615
Gohir.D05G174600.3	0.00944217	0.908636	0.755303	-0.45944	-0.49663	-0.717311		Gohir.A10G137500.1	-0.694928	-1.45546	-1.43662	1.42354	0.991664	1.17181
Gohir.A09G179000.2	0.290766	0.745122	0.879251	-0.741335	-0.579125	-0.59468		Gohir.A10G159200.1	-0.572686	-0.880697	-0.566871	0.0731265	1.2873	0.659826
Gohir.D05G058900.2	1.13828	1.26172	1.07543	-1.24987	-1.22599	-0.999567		Gohir.A12G184400.1	-0.712069	-0.69316	-0.472916	0.377706	0.741931	0.758509
Gohir.D01G215200.1	0.495804	0.581396	0.571214	-0.605051	-0.587563	-0.455799		Gohir.D04G015300.1	-0.353002	-1.97466	-0.827444	1.17177	0.956003	1.02734
Gohir.A04G124500.2	2.77942	1.94291	0.909926	-1.56787	-1.82126	-2.24312		Gohir.D13G142800.1	-0.343811	-1.46493	-1.30077	1.12525	1.22048	0.763778
Gohir.D01G217600.1	0.223764	0.549333	0.804263	-0.620834	-0.593806	-0.362719		Gohir.D04G191700.1	-0.973766	-1.24701	-0.572016	0.782001	1.1075	0.903291
Gohir.D04G032000.1	0.0322725	1.38444	1.32153	-1.05049	-0.935209	-0.752542		Gohir.D11G296784.1	-0.53937	-0.53937	-0.53937	0.758115	0.810561	0.0494344
Gohir.D12G110900.1	0.233468	1.03794	0.802356	-0.371585	-0.831295	-0.870887		Gohir.A12G117600.1	-0.226442	-1.13812	-1.28305	1.00233	0.663572	0.981714
Gohir.A10G237100.1	1.02523	0.672974	0.430957	-0.461128	-0.746759	-0.921271		Gohir.D06G156300.1	-0.259851	-0.772781	-0.683869	0.398056	0.670383	0.648062
Gohir.A05G387000.2	0.88435	0.601523	0.493091	-0.522302	-0.623621	-0.833041		Gohir.A12G113100.2	-0.334522	-2.26498	-1.09038	1.36249	1.42581	0.901584
Gohir.D13G076700.1	1.15735	1.0149	0.721381	-1.08445	-0.878065	-0.931111		Gohir.A09G163500.1	-0.762088	-0.951536	-1.49309	0.663134	1.13687	1.40672
Gohir.A03G024600.1	1.66101	1.21167	1.09676	-1.42139	-1.19335	-1.35471		Gohir.D06G022100.1	-0.70845	-2.26914	-3.2521	1.2356	2.62772	2.36637
Gohir.D04G022850.1	0.69638	0.754555	0.581357	-0.709068	-0.709068	-0.614156		Gohir.A12G141700.1	-1.4475	-1.09603	-1.76124	1.38117	1.60958	1.31401
Gohir.D04G022372.1	0.604436	1.21182	1.00092	-0.93906	-0.93906	-0.93906		Gohir.D10G129101.1	-0.706249	-1.07533	-0.971104	1.0002	0.852707	0.899783
Gohir.A05G206000.1	2.09489	1.47136	1.01626	-1.60637	-1.76347	-1.21267		Gohir.A07G203200.1	-1.757	-1.81671	-0.733521	0.812091	2.11255	1.38259
Gohir.D05G145900.1	0.124599	0.470071	0.73886	-0.447236	-0.480281	-0.406013		Gohir.A09G217700.1	-0.395351	-0.472594	-0.472594	-0.111949	0.585376	0.867113
Gohir.D11G025300.1	0.0963143	1.73323	1.71843	-1.15944	-1.40667	-0.981862		Gohir.D11G099500.1	-0.368958	-0.56616	-0.727536	0.0400355	0.85495	0.767668
Gohir.A01G171000.1	0.17238	0.547981	0.702083	-0.338054	-0.542195	-0.542195		Gohir.D03G098901.1	-1.58018	-1.58018	-1.58018	1.89153	1.21413	1.63488
Gohir.D08G192400.1	1.6156	1.10315	0.855343	-1.23068	-1.1609	-1.18252		Gohir.D05G163600.1	-0.377463	-1.0687	-0.692023	0.770455	0.66432	0.70341
Gohir.A10G236200.1	1.21281	1.38427	0.555879	-1.33612	-0.711601	-1.10524		Gohir.A11G081400.1	-0.498496	-0.81652	-1.22507	0.774927	0.808498	0.956664
Gohir.A09G241800.1	0.873519	0.773272	0.574817	-0.70985	-0.662852	-0.848907		Gohir.A07G017400.1	-0.618599	-0.984578	-0.954179	0.86089	0.790467	0.905999
Gohir.A10G144700.1	0.862436	1.27418	1.06497	-1.18816	-1.01285	-1.00056		Gohir.A04G127300.2	-0.735994	-0.735994	-0.735994	1.22637	0.585357	0.396254
Gohir.D08G208100.1	0.321935	1.54699	1.50276	-0.806912	-1.34942	-1.21536		Gohir.A01G076100.1	-0.336922	-0.590307	-0.590307	0.8801	0.187902	0.449534
Gohir.D03G013800.2	0.953128	1.06397	0.794973	-1.02194	-1.0299	-0.760227		Gohir.D13G061200.1	-0.564756	-0.908368	-0.48114	0.807921	0.754796	0.391546
Gohir.A11G324340.1	0.368502	0.452663	0.586884	-0.618809	-0.390294	-0.398946		Gohir.A03G209200.1	-0.604259	-0.600964	-0.707964	0.517969	0.665723	0.729496
Gohir.D13G089500.1	0.253194	0.563511	0.525228	-0.418888	-0.453113	-0.469931		Gohir.D06G126200.1	-0.349771	-1.05565	-0.754221	0.884779	0.729409	0.545451
Gohir.D13G012900.1	0.793494	1.31839	0.88652	-1.20939	-0.984241	-0.804775		Gohir.A13G044200.1	-0.848521	-2.29179	-2.0198	1.56391	1.76865	1.82756
Gohir.D06G171700.1	0.124872	1.29566	1.17854	-0.827253	-0.864584	-0.907229		Gohir.A11G291900.1	-0.567225	-1.49014	-1.85899	0.779021	1.81893	1.31841
Gohir.D11G312054.1	0.532894	0.266317	0.581478	-0.413811	-0.257933	-0.708946		Gohir.A02G003400.3	-0.814947	-1.24407	-1.51965	0.903559	1.28905	1.38606
Gohir.D12G013800.1	0.90634	0.844043	1.13054	-0.921446	-0.859816	-1.09966		Gohir.A04G091850.1	-0.534752	-0.52307	-0.86133	0.244972	1.06222	0.611964
Gohir.A05G267400.1	0.0437138	1.14278	0.867477	-0.670642	-0.676456	-0.706871		Gohir.A13G093800.2	-0.696055	-1.43677	-1.59407	0.952918	1.3571	1.41688
Gohir.D12G188500.2	0.652511	1.2986	0.8641	-0.700083	-1.09874	-1.01638		Gohir.D01G156000.1	-0.719899	-0.82137	-0.481571	0.014744	1.17343	0.834662
Gohir.A11G283826.1	0.257219	0.714218	1.0456	-0.784779	-0.526932	-0.705328		Gohir.D09G168300.1	-0.820598	-1.07049	-0.82263	0.703538	0.965572	1.04461
Gohir.D04G172750.1	1.02975	1.71655	0.85495	-1.13758	-1.17033	-1.29333		Gohir.D07G151750.1	-0.66181	-0.66181	-0.66181	0.652596	0.5952	0.737634
Gohir.A07G152700.1	1.26693	1.08929	0.852168	-0.533996	-1.02812	-1.64628		Gohir.D08G222000.1	-0.247583	-2.14629	-1.27325	1.82033	1.11416	0.732637
Gohir.D03G079400.1	1.0071	1.37662	1.19787	-0.972939	-1.48978	-1.11887		Gohir.D07G196700.1	-0.656395	-0.881966	-1.36196	1.40844	0.60458	0.8873
Gohir.D01G165300.1	2.49816	2.07845	1.80872	-1.64788	-2.53222	-2.20524		Gohir.D06G117900.1	-0.713925	-1.21739	-1.14079	0.897375	1.20904	0.965687
Gohir.D08G172100.1	0.470271	1.28356	1.0603	-1.03664	-0.874425	-0.903072		Gohir.A05G100200.1	-1.01128	-1.01128	-1.01128	1.27353	0.202842	1.55748
Gohir.D04G185200.1	1.12585	1.28804	0.887543	-0.929366	-1.15544	-1.21662		Gohir.D06G172800.3	-0.31361	-2.20723	-2.72887	1.16652	2.32446	1.75873
Gohir.D12G229400.1	0.552792	1.33779	1.20503	-0.983502	-0.88361	-1.22849		Gohir.A03G000400.2	-0.704288	-1.04055	-0.863555	0.40629	1.18764	1.01447
Gohir.D02G185200.2	0.348288	0.818016	0.901642	-0.629625	-0.911412	-0.52691		Gohir.A03G002500.1	-0.679125	-1.25887	-1.48338	0.718501	1.27762	1.42526
Gohir.A10G179500.1	1.8701	0.685247	0.249474	-0.829062	-1.00712	-0.968636		Gohir.D02G189500.1	-1.25372	-1.62073	-0.897539	0.0341467	1.8805	1.85734
Gohir.D09G072400.1	1.14664	1.6292	1.89908	-1.58233	-1.59555	-1.49704		Gohir.D09G131700.1	-0.705739	-1.24318	-0.951747	0.87262	1.24909	0.778955
Gohir.A11G230200.1	0.68569	2.29793	0.640797	-1.24365	-1.23718	-1.14359		Gohir.A11G056900.1	-0.869655	-1.04323	-0.81147	0.436142	1.01942	1.2688
Gohir.A06G028000.1	1.00861	1.0948	0.990981	-0.661307	-1.16536	-1.26772		Gohir.A09G027732.1	-0.264683	-0.840692	-0.894152	0.900444	0.700044	0.399038
Gohir.A01G198000.1	0.796185	1.44665	1.03946	-1.0928	-1.09862	-1.09087		Gohir.A11G249900.1	-1.29455	-1.29455	-0.846707	0.99026	1.07561	1.36993
Gohir.D07G234700.1	0.76089	1.39553	1.02221	-0.791398	-1.19535	-1.19188		Gohir.D13G095200.3	-0.816916	-1.42647	-1.8208	1.42748	1.31691	1.31981
Gohir.D04G172700.1	0.289296	1.71892	0.420488	-0.555302	-0.915379	-0.958024		Gohir.A03G148700.1	-0.838503	-1.10872	-1.18555	0.572378	1.20729	1.3531
Gohir.D11G137366.1	0.3294	1.53748	1.52845	-1.08864	-1.40457	-0.902128		Gohir.D10G047900.1	-0.419997	-1.17793	-1.42197	0.855852	1.12982	1.03423
Gohir.D05G091900.1	1.75648	1.06388	1.35748	-1.53844	-1.23088	-1.40853		Gohir.A13G148700.2	-0.562494	-0.998628	-1.00593	0.66101	0.937012	0.969033
Gohir.D08G195900.1	0.837211	1.43177	1.18755	-0.884019	-1.38774	-1.18477		Gohir.A04G066600.1	-0.357838	-0.846353	-0.739334	0.714851	0.797042	0.431632
Gohir.A06G204300.2	0.554214	0.884196	0.641461	-0.706619	-0.825766	-0.547486		Gohir.D10G021500.1	-0.0812191	-1.4754	-1.35992	1.117	1.0593	0.740237
Gohir.D11G100800.1	1.62972	0.338324	0.804301	-1.41157	-0.795967	-0.564809		Gohir.D02G050100.1	-0.719685	-0.694367	-0.606428	0.499644	0.634023	0.886813
Gohir.A12G063100.1	1.45979	0.797504	0.340099	-0.685024	-1.03469	-0.877669		Gohir.D07G031500.1	-0.423627	-0.795021	-0.413886	0.356097	0.894386	0.382051
Gohir.D11G164800.1	0.901939	0.988554	0.844913	-1.22228	-0.867056	-0.646066		Gohir.A11G329600.1	-0.62833	-1.54984	-1.6323	1.43426	1.15713	1.21908
Gohir.D05G276000.1	0.668323	0.720208	0.686751	-0.691761	-0.691761	-0.691761		Gohir.A05G157300.1	-0.665938	-1.02226	-0.719037	1.17411	0.661922	0.571205
Gohir.D06G152800.1	0.875268	0.651382	1.12813	-0.93358	-0.888552	-0.832651		Gohir.A13G232450.1	-0.354712	-0.505272	-0.383594	0.483867	0.1782	0.581512
Gohir.A02G171100.1	0.929898	1.33221	0.850666	-0.942431	-1.08517	-1.08517		Gohir.D08G203400.1	-0.603404	-0.790333	-1.00277	0.873278	0.870695	0.652533
Gohir.D13G073800.1	0.502966	0.402425	0.556868	-0.41249	-0.604053	-0.445716		Gohir.D07G152800.1	-0.522039	-0.656988	-1.07491	0.823107	0.79733	0.6335
Gohir.D05G263300.1	0.892241	0.568255	0.645462	-0.802382	-0.589023	-0.714553		Gohir.A10G220600.2	-0.703792	-0.891419	-0.492438	0.422976	0.92876	0.735912
Gohir.D02G062100.2	0.00402456	0.863044	0.796962	-0.555227	-0.473724	-0.63508		Gohir.D03G175800.1	-1.10388	-1.92552	-1.70621	1.33163	1.76049	1.6435
Gohir.D09G157800.1	1.12399	1.04031	0.775081	-1.08679	-1.00585	-0.846745		Gohir.A13G214300.1	-1.15129	-1.82356	-1.95426	1.21087	1.72109	1.99715
Gohir.A03G129000.2	0.260679	1.6265	1.08952	-0.952701	-0.991442	-1.03255		Gohir.D03G095900.1	-0.485805	-0.992859	-1.09489	0.885879	0.797141	0.890538
Gohir.A04G085900.1	0.916394	1.56356	1.38205	-1.12245	-1.38209	-1.35747		Gohir.A10G220850.1	-0.618755	-1.71961	-1.34781	0.727406	1.49079	1.46798
Gohir.A03G154500.1	0.844414	0.760761	0.275526	-0.53688	-0.791908	-0.551912		Gohir.A10G184900.2	-0.75575	-0.75575	-0.75575	0.3459	0.70735	1.214
Gohir.D03G032800.3	1.35139	0.732175	0.453206	-0.725676	-0.949202	-0.861895		Gohir.A07G026600.1	-1.18992	-1.61763	-1.41308	2.01991	1.05319	1.14752
Gohir.A10G124600.1	1.20701	1.65392	1.04103	-0.874575	-1.50221	-1.52517		Gohir.A04G145100.1	-0.892842	-1.40071	-1.59212	0.64077	1.59439	1.65052
Gohir.A02G101000.1	0.360045	0.457863	0.502539	-0.591631	-0.439288	-0.289527		Gohir.A11G058601.1	-1.1108	-1.96736	-1.29626	0.89436	1.96906	1.511
Gohir.A03G075332.1	0.758054	1.42813	1.74989	-0.869607	-1.41445	-1.65202		Gohir.A07G162000.3	-1.79086	-1.79086	-1.79086	1.41813	1.42931	2.52514
Gohir.A05G158300.1	1.37644	0.727884	0.313469	-0.637929	-0.962783	-0.817081		Gohir.A10G088200.1	-0.627533	-2.3513	-2.15835	1.54052	1.78521	1.81146
Gohir.D05G186900.1	0.14139	2.15664	1.47546	-0.47201	-1.81405	-1.48744		Gohir.D01G055801.1	-0.500576	-1.84525	-1.71882	1.19686	1.44767	1.4201
Gohir.A02G041801.1	0.681819	1.30769	1.23416	-1.30983	-1.09566	-0.81818		Gohir.D09G170700.1	-1.27851	-1.57737	-2.10425	0.975133	2.00512	1.97987
Gohir.A02G081500.1	1.48832	0.933167	0.696995	-0.536475	-0.908941	-1.67306		Gohir.D13G011200.1	-0.754884	-0.817382	-0.500125	0.789048	0.465288	0.818055
Gohir.A01G173900.2	1.21166	0.992381	0.578177	-0.890686	-0.937552	-0.953978		Gohir.D13G227800.1	-0.791463	-1.96166	-1.36809	1.20724	1.43433	1.47966
Gohir.A12G072900.1	0.0124363	0.949324	0.758521	-0.527051	-0.548484	-0.644746		Gohir.D05G322600.2	-0.871625	-0.937397	-0.674756	0.688497	0.86844	0.92684
Gohir.A07G004900.1	2.0786	0.62909	-0.00818529	-0.772281	-1.01107	-0.916156		Gohir.A01G180000.1	-0.628721	-2.07473	-1.93124	1.60458	1.67283	1.35728
Gohir.A10G052900.1	1.54613	0.101358	0.334764	-0.6694	-0.723206	-0.589643		Gohir.D02G029200.1	-1.07975	-1.47375	-1.07731	1.32901	1.16792	1.13388
Gohir.A12G242100.1	1.45537	0.668757	0.882453	-0.919299	-1.20792	-0.879356		Gohir.D07G017700.1	-0.519358	-0.985114	-0.291705	0.57278	0.88337	0.340028
Gohir.D11G264400.1	2.58785	1.32878	1.9538	-2.55703	-1.84673	-1.46668		Gohir.A09G107500.2	-0.974732	-1.08339	-1.01909	1.622	0.706145	0.74907
Gohir.A05G070800.1	1.19856	0.9069	1.31099	-1.69999	-0.804966	-0.911491		Gohir.D03G033600.2	-0.891705	-1.35937	-0.965283	1.10791	1.06203	1.04642
Gohir.D02G199600.1	1.53025	1.09904	0.798938	-1.11459	-1.15197	-1.16166		Gohir.A08G179700.4	-0.357439	-0.63565	-0.618986	0.30379	0.359831	0.948453
Gohir.A08G222400.1	1.63649	0.237198	0.784305	-1.36328	-0.713892	-0.580822		Gohir.A05G137400.1	-1.02253	-0.954972	-1.17286	0.696816	1.09329	1.36026
Gohir.A03G063500.1	1.35816	0.648481	1.24609	-1.21683	-1.11746	-0.918444		Gohir.D05G182600.1	-0.494575	-1.52425	-1.34106	1.15872	1.16924	1.03193
Gohir.D09G221400.1	1.26088	1.65885	1.4005	-1.78007	-1.20884	-1.33132		Gohir.A05G048700.1	-0.674412	-1.93173	-0.721465	1.84908	0.847612	0.630923
Gohir.1Z049484.1	0.761234	1.08892	0.695145	-0.487811	-1.11615	-0.94134		Gohir.D03G024200.2	-0.253826	-0.815027	-1.12151	0.817857	0.669717	0.702791
Gohir.A12G194100.1	1.24376	1.25186	0.698204	-1.06063	-0.792383	-1.34081		Gohir.D06G086600.1	-0.483361	-0.626155	-0.396163	0.331678	0.571752	0.60225
Gohir.A05G393000.1	0.883779	1.93317	0.595402	-0.926122	-1.18826	-1.29796		Gohir.A05G406500.1	-0.501757	-1.14978	-1.62717	0.991871	1.16767	1.11916
Gohir.D11G299400.1	-0.0208743	1.04667	0.904459	-0.539586	-0.695335	-0.695335		Gohir.A06G136802.1	-0.703232	-1.65495	-2.0015	1.26507	1.60921	1.4854
Gohir.A12G101100.1	-0.514925	1.25806	1.39523	-0.71279	-0.71279	-0.71279		Gohir.A11G038400.1	-0.646621	-1.60921	-0.938048	1.31115	0.919183	0.963548
Gohir.D01G197800.2	0.879034	0.855685	0.764702	-0.783342	-0.875706	-0.840373		Gohir.D13G021800.1	-0.878364	-0.878364	-0.878364	1.18583	0.186519	1.26274
Gohir.A12G227700.1	0.902748	1.30113	1.04026	-0.874031	-1.3257	-1.0444		Gohir.D11G219200.1	-0.440116	-0.866931	-1.00181	0.478456	0.669032	1.16137
Gohir.D05G247500.1	0.563598	1.07692	1.19007	-1.3095	-0.794797	-0.726286		Gohir.D12G231400.1	-0.251118	-0.756607	-0.852779	0.470739	0.857824	0.531941
Gohir.A05G040900.1	0.812296	1.31862	1.16629	-0.842065	-1.17709	-1.27805		Gohir.D08G247400.2	-1.00544	-1.50702	-1.71485	1.30931	1.44856	1.46944
Gohir.A05G184000.1	0.727855	0.223278	0.503054	-0.626557	-0.452817	-0.374814		Gohir.A07G128000.1	-1.00651	-1.43988	-0.588196	0.026714	1.609	1.39886
Gohir.D06G189100.1	0.242096	0.916974	0.715492	-0.778716	-0.651336	-0.444509		Gohir.A12G218600.1	-0.471058	-0.853203	-0.739547	-0.182376	1.13161	1.11458
Gohir.D10G141701.1	0.90398	1.24542	1.01021	-0.78429	-1.08184	-1.29349		Gohir.D05G158950.1	-0.763655	-1.83107	-0.872451	1.74933	0.577284	1.14055
Gohir.D05G247400.1	1.14357	0.399778	0.207804	-0.478721	-0.63484	-0.63759		Gohir.A02G033700.1	-0.398784	-0.461724	-0.445391	0.0937383	0.56136	0.650802
Gohir.D13G063500.1	1.73908	0.48164	0.523417	-1.46379	-0.73007	-0.550276		Gohir.D13G153200.2	-0.655952	-0.8914	-1.03252	0.648886	1.06216	0.86882
Gohir.A03G057500.1	0.724201	1.24907	1.09464	-1.18944	-0.921904	-0.956567		Gohir.A13G220600.1	-0.598863	-2.33272	-1.60704	1.91446	1.1891	1.43507
Gohir.D06G028900.1	0.165627	1.44575	1.42492	-0.989784	-0.849516	-1.197		Gohir.D11G212700.2	-0.322825	-1.36315	-1.28247	0.933904	0.983922	1.05062
Gohir.A02G016500.1	1.22973	1.43439	1.32	-1.35864	-1.33846	-1.28703		Gohir.D08G269000.1	-0.450022	-0.670352	-0.578145	0.405522	0.668215	0.624783
Gohir.D05G045400.1	1.07899	0.52698	0.833805	-1.20206	-0.661747	-0.575964		Gohir.D07G138900.1	-0.353861	-0.784681	-0.663003	0.705376	0.620222	0.475947
Gohir.D02G107300.1	0.300981	1.18508	1.10359	-0.710711	-0.955317	-0.923624		Gohir.A10G201800.1	-0.789468	-1.94895	-1.77288	0.795352	1.82429	1.89166
Gohir.A10G089200.1	0.596106	1.00493	0.454448	-0.558009	-0.356225	-1.14125		Gohir.A10G094900.1	-0.670052	-0.670052	-0.670052	0.487639	0.903323	0.619193
Gohir.A01G219000.1	0.587644	1.22426	1.29762	-1.14581	-1.01125	-0.952474		Gohir.1Z014800.1	-0.567681	-1.61454	-1.48079	1.16306	1.26155	1.23841
Gohir.D10G187400.1	1.57245	0.693932	0.4849	-0.808023	-0.989136	-0.95412		Gohir.A06G077700.1	-0.424679	-0.889401	-0.730962	0.66843	0.712824	0.663788
Gohir.A05G084500.2	0.155046	1.21097	2.05727	-1.34695	-0.563791	-1.51255		Gohir.D05G085050.1	-0.668178	-1.11085	-0.341589	0.505488	0.685722	0.929407
Gohir.A12G052300.1	0.616583	1.11248	1.11363	-0.950251	-1.08435	-0.808092		Gohir.D02G002300.1	-0.491813	-0.713926	-0.593203	0.87526	0.459249	0.464434
Gohir.D06G081600.1	0.574445	1.46806	1.31918	-1.11389	-1.23759	-1.01021		Gohir.D04G090816.1	-0.601181	-0.601181	-0.601181	0.61667	0.281657	0.905217
Gohir.A07G026000.1	0.967453	1.80691	1.76905	-1.73808	-1.38438	-1.42096		Gohir.D02G117600.1	-0.689165	-1.18512	-1.35709	0.878984	1.23663	1.11576
Gohir.D13G223500.1	1.76584	1.21409	0.862381	-1.10557	-1.37957	-1.35717		Gohir.D10G183100.1	-0.781965	-1.84474	-2.36097	1.46088	1.73114	1.79566
Gohir.D10G155200.2	3.02602	0.469741	0.41782	-1.75415	-1.08082	-1.07861		Gohir.D11G192600.1	-0.903936	-1.66556	-1.18013	0.454554	1.48342	1.81165
Gohir.A06G007000.1	0.847987	0.663218	0.489631	-0.652967	-0.712706	-0.635163		Gohir.A10G026900.1	-0.800544	-0.881978	-1.12427	0.151362	1.431	1.22443
Gohir.D05G211900.1	0.913844	1.09949	1.5446	-0.480387	-0.96185	-2.1157		Gohir.D10G034100.1	-1.10054	-1.14632	-0.692168	1.13817	0.968287	0.832577
Gohir.D02G006200.1	1.80821	0.0638259	0.663912	-0.984571	-0.820926	-0.730451		Gohir.A03G000037.1	-1.06011	-1.55653	-1.67416	1.02214	1.58437	1.68429
Gohir.A01G192300.1	0.619831	0.780674	0.428689	-0.431508	-0.637341	-0.760345		Gohir.D04G082000.1	-0.481886	-0.759789	-0.955193	0.645711	0.648279	0.902877
Gohir.D10G028400.1	0.226921	1.2654	0.584943	-0.73369	-0.540588	-0.802983		Gohir.D09G120100.1	-0.636153	-0.636153	-0.636153	0.992854	0.872783	0.0428207
Gohir.D03G107200.2	0.997722	0.816361	0.668081	-0.806677	-0.802549	-0.872938		Gohir.A02G135200.1	-0.335809	-0.912704	-0.896704	0.800468	0.625012	0.719737
Gohir.A08G000153.1	0.803009	0.848526	1.0076	-0.911434	-0.774687	-0.973015		Gohir.D05G102100.1	-0.811666	-1.3144	-1.15242	1.0963	1.1126	1.06959
Gohir.D13G076200.1	2.8906	1.36564	1.44537	-1.75668	-1.95634	-1.9886		Gohir.D01G125500.1	-0.3384	-1.0675	-1.05029	0.855463	0.944	0.656718
Gohir.A01G167300.1	0.986829	1.3321	0.397787	-0.628431	-1.07544	-1.01285		Gohir.D11G340600.1	-1.08387	-1.07113	-1.61962	0.839074	1.54818	1.38737
Gohir.D06G000400.1	0.364762	0.886753	0.496029	-0.553016	-0.346565	-0.847963		Gohir.A08G011600.1	-1.10599	-1.50262	-1.08634	1.37815	1.084	1.2328
Gohir.A05G074401.1	0.82414	0.419325	1.16846	-0.853163	-0.873817	-0.684948		Gohir.D13G121301.1	-0.487238	-2.52698	-3.71669	2.53499	2.37953	1.81639
Gohir.D05G201820.1	0.232063	1.19663	1.46768	-1.13307	-0.630229	-1.13307		Gohir.A03G109200.2	-1.14931	-1.36018	-1.69772	1.07539	1.51385	1.61797
Gohir.D05G375550.1	0.564535	0.859364	0.630675	-0.598919	-0.706417	-0.749238		Gohir.D05G216200.1	-0.429078	-0.599537	-0.580416	0.0974188	0.522661	0.98895
Gohir.A09G093700.1	1.44302	1.122	0.706121	-1.03388	-1.23231	-1.00495		Gohir.D10G028500.1	-0.386928	-0.640312	-0.447487	0.467376	0.410712	0.59664
Gohir.D05G317300.1	0.556301	0.477439	0.569782	-0.474333	-0.605264	-0.523924		Gohir.D10G250250.1	-0.665066	-0.665066	-0.665066	0.918934	0.357834	0.718431
Gohir.A03G020400.1	0.542454	1.6565	1.25391	-1.05936	-1.19179	-1.20172		Gohir.A13G168950.1	-0.318043	-2.13931	-0.89502	0.802894	1.44992	1.09955
Gohir.A01G087300.1	0.701998	1.37842	1.08884	-1.19941	-1.33303	-0.636813		Gohir.A06G002200.1	-0.755887	-0.635033	-0.800753	0.54586	0.797119	0.848694
Gohir.A09G232700.1	0.421893	0.495608	0.880885	-0.780269	-0.522471	-0.495645		Gohir.A03G139100.1	-1.42033	-1.1411	-0.485933	0.211478	1.42318	1.4127
Gohir.D07G186200.1	-0.229258	1.70754	1.11024	-0.617528	-0.866397	-1.1046		Gohir.D13G153700.2	-1.05434	-0.86932	-0.888533	1.02421	0.847863	0.940119
Gohir.A05G223600.1	0.0488048	1.61573	1.6601	-1.35804	-0.998119	-0.96848		Gohir.A05G209601.1	-0.646037	-1.18035	-0.784569	0.331406	1.29393	0.985615
Gohir.A09G151200.1	0.324693	1.95629	1.68775	-0.679671	-1.7653	-1.52376		Gohir.A05G359700.1	-0.501606	-0.619907	-0.58941	0.0580169	0.909057	0.743848
Gohir.A05G027000.1	0.841799	0.27726	0.696636	-0.622046	-0.654836	-0.538812		Gohir.A09G085000.1	-1.21051	-1.44194	-1.44194	0.426351	1.52153	2.1465
Gohir.A08G202950.1	1.90155	0.982025	0.424064	-0.870501	-0.899385	-1.53776		Gohir.A12G095200.1	-0.95181	-1.01444	-0.476745	0.749404	0.900957	0.792638
Gohir.A05G279000.1	0.111367	1.15501	1.42662	-1.00725	-0.761224	-0.924526		Gohir.A07G095000.1	-0.611435	-0.966572	-1.1215	0.78825	0.977944	0.933317
Gohir.A01G096800.2	0.628776	1.73719	1.54556	-1.08836	-1.54159	-1.28156		Gohir.A03G050650.1	-0.447476	-0.510463	-0.494781	0.329922	0.384642	0.738156
Gohir.A11G280900.1	2.71358	3.12525	-1.45971	-1.45971	-1.45971	-1.45971		Gohir.A05G403500.1	-0.600731	-1.86914	-0.589245	0.977279	1.03602	1.04582
Gohir.A09G219400.1	1.62136	1.03452	0.771992	-1.23493	-1.08266	-1.11029		Gohir.A11G226600.1	-1.02294	-1.36862	-0.510436	0.833872	1.01206	1.05606
Gohir.D09G230900.1	0.333804	1.27731	1.30812	-0.406016	-1.52937	-0.983853		Gohir.A10G241300.1	-1.24961	-0.736651	-0.182634	0.724192	0.566789	0.877914
Gohir.A10G199500.1	0.823146	0.975795	0.748614	-0.654152	-0.878606	-1.0148		Gohir.D10G025700.1	-0.664045	-1.49334	-1.21005	0.357775	1.55197	1.45769
Gohir.A05G205300.1	1.37589	0.609783	0.32482	-0.92481	-0.367488	-1.0182		Gohir.D11G284300.1	-0.44305	-0.990067	-1.11955	1.10981	0.553012	0.889846
Gohir.D09G026700.1	0.603116	0.383037	0.854318	-0.671411	-0.54571	-0.62335		Gohir.A10G227500.1	-0.39274	-0.8883	-0.663172	0.758729	0.524855	0.660628
Gohir.A10G199000.1	-0.172154	1.89868	1.18304	-1.45507	-0.705414	-0.749079		Gohir.A13G215600.1	-0.717938	-1.27165	-1.0459	0.795148	1.07904	1.1613
Gohir.A03G013000.1	0.890357	0.859564	0.753437	-0.898869	-0.806667	-0.797821		Gohir.D13G195400.1	-0.97015	-2.20803	-1.54152	1.80114	1.55221	1.36635
Gohir.D12G175200.1	0.529758	1.03512	0.110969	-0.598159	-0.678134	-0.399555		Gohir.D02G203066.1	-0.773935	-0.973147	-0.718715	0.661416	0.820034	0.984346
Gohir.D04G054800.1	0.871588	1.75618	1.00817	-1.15811	-1.24122	-1.2366		Gohir.D08G021050.1	-1.57683	-1.81033	-1.26215	0.527783	2.14441	1.97712
Gohir.D06G000300.2	0.77717	0.760847	0.757407	-0.81802	-0.576048	-0.901355		Gohir.D11G024100.1	-0.467799	-1.75671	-1.51849	0.916587	1.5193	1.30711
Gohir.A03G203900.1	1.68332	0.863012	0.885676	-1.05654	-1.19004	-1.18543		Gohir.A08G079600.1	-0.80861	-1.25896	-0.843639	1.16892	1.1151	0.627189
Gohir.D07G105700.1	1.02976	1.02939	1.0351	-1.18495	-0.968944	-0.940362		Gohir.A01G230500.1	-1.30335	-1.05975	-0.69103	0.69161	1.22149	1.14103
Gohir.D10G018100.1	-0.0183269	1.15282	1.17194	-0.637836	-0.864526	-0.804075		Gohir.D05G240200.1	-0.722985	-0.667193	-0.884162	0.264861	0.953043	1.05644
Gohir.D02G193300.1	1.63464	0.548883	1.00394	-1.26696	-0.892287	-1.02822		Gohir.D05G080700.2	-0.638556	-0.798147	-0.858886	0.791878	0.583128	0.920584
Gohir.A12G274800.1	0.323703	1.38965	1.64351	-1.11583	-0.904243	-1.33679		Gohir.A05G095200.1	-0.668682	-1.32844	-1.41419	0.9653	1.21829	1.22772
Gohir.A12G185700.1	1.18313	1.33157	0.947194	-0.38228	-1.46173	-1.61789		Gohir.A01G060200.1	-0.859272	-1.69185	-1.66264	1.26768	1.53794	1.40814
Gohir.A11G108200.2	0.669445	1.32543	1.13695	-0.703091	-1.30687	-1.12187		Gohir.A04G076700.1	-0.328011	-0.858329	-0.708115	0.624816	0.608742	0.660896
Gohir.A07G076500.1	1.7582	1.07706	0.629153	-0.657024	-1.24983	-1.55756		Gohir.A11G186200.1	-0.284817	-0.46195	-0.333767	0.413363	0.236548	0.430624
Gohir.D05G051500.1	0.912805	1.16735	0.635673	-0.823424	-0.862595	-1.0298		Gohir.A08G008300.1	-0.567323	-1.68784	-1.41294	0.927684	1.28422	1.4562
Gohir.A05G264050.1	0.814872	0.954961	0.556426	-0.699162	-1.08287	-0.544224		Gohir.D09G159000.2	-0.68859	-0.873661	-1.0403	0.519141	1.02679	1.05662
Gohir.A05G096200.1	1.01147	0.45156	1.98722	-1.20098	-0.868142	-1.38113		Gohir.A08G184100.1	-0.634956	-0.673393	-0.451825	0.496532	0.425566	0.838075
Gohir.D12G275500.1	0.0463822	0.925773	1.38748	-0.552836	-0.726822	-1.07998		Gohir.A02G050300.1	-1.32417	-0.965774	-0.629958	0.743125	0.992265	1.18451
Gohir.A05G166500.1	0.59795	0.93172	0.891296	-0.937224	-0.79961	-0.684133		Gohir.D07G108200.1	-0.555128	-1.87619	-2.24364	2.04409	1.15389	1.47697
Gohir.A07G148600.1	2.26619	1.29665	1.26584	-1.60341	-1.34928	-1.87598		Gohir.A13G230933.1	-0.364296	-0.682758	-0.434223	0.680133	0.586275	0.21487
Gohir.A05G053500.1	2.67895	0.967118	1.91495	-2.22835	-1.58369	-1.74898		Gohir.D13G233400.1	-1.01567	-1.83907	-1.83267	1.33484	1.84163	1.51095
Gohir.D12G244500.1	1.54718	1.1112	1.04077	-0.891833	-1.51222	-1.2951		Gohir.D11G271333.1	-0.834858	-1.811	-1.0404	1.4574	1.22577	1.00309
Gohir.D06G165300.1	0.936294	0.757286	0.626456	-0.754868	-0.787913	-0.777256		Gohir.D05G072800.1	-0.76541	-1.97403	-1.3118	1.63764	1.26815	1.14545
Gohir.D11G075500.1	0.755642	0.333137	0.469101	-0.381862	-0.639776	-0.536242		Gohir.A03G000036.1	-1.18911	-2.15213	-1.97197	1.39253	1.99566	1.92502
Gohir.A02G052100.1	0.0788146	1.73123	1.3221	-0.637923	-1.08542	-1.4088		Gohir.D08G256000.1	-0.90325	-1.7501	-1.85737	1.8502	1.43892	1.2216
Gohir.D06G034300.1	0.777269	1.22109	1.17502	-1.10488	-0.959884	-1.10861		Gohir.D04G025400.1	-0.661675	-0.966774	-1.17142	0.297055	1.19268	1.31014
Gohir.A12G261866.1	-0.542644	1.41749	1.56131	-0.784145	-0.897486	-0.754528		Gohir.D11G160000.1	-0.251125	-0.894686	-0.655191	0.753587	0.531064	0.516352
Gohir.D06G029000.1	1.0493	0.781412	0.966115	-0.950039	-0.775485	-1.0713		Gohir.D12G178000.1	-0.436752	-1.18647	-1.29439	0.673236	1.2859	0.95848
Gohir.D09G118700.2	2.12906	0.220781	0.153289	-0.876632	-0.748804	-0.877693		Gohir.A02G172200.1	-0.589482	-1.10557	-1.46395	0.905032	1.1121	1.14187
Gohir.A10G179700.1	1.46092	1.30453	0.887342	-0.983496	-0.992441	-1.67686		Gohir.A06G081500.1	-0.679663	-0.847325	-0.806148	1.06548	0.625963	0.641693
Gohir.D04G013800.1	4.57489	0.531585	0.92789	-2.79191	-1.54903	-1.69342		Gohir.A05G320400.3	-0.767756	-1.02186	-0.519319	0.572692	0.861112	0.875132
Gohir.A09G227900.1	0.796448	1.39641	1.17969	-1.34734	-0.865133	-1.16008		Gohir.D12G224600.1	-0.421919	-0.324228	-0.784217	0.359181	0.738972	0.43221
Gohir.D03G027700.2	1.32859	0.726512	0.43376	-0.622882	-0.802383	-1.0636		Gohir.A07G107300.1	-1.95705	-1.03866	-1.95705	1.03572	1.75566	2.16139
Gohir.A12G135000.1	-0.0285031	2.00103	1.3798	-1.35533	-1.4472	-0.5498		Gohir.D13G155100.1	-1.19953	-1.26307	-1.46907	0.483577	1.64573	1.80236
Gohir.A02G079600.1	1.13157	1.60483	1.84377	-1.29595	-1.68838	-1.59585		Gohir.D05G163300.1	-0.591539	-0.636421	-0.635081	0.577519	0.602161	0.68336
Gohir.D04G144600.1	0.70961	0.705067	0.51936	-0.409955	-0.772103	-0.751978		Gohir.D04G087700.1	-0.50579	-0.528637	-0.527283	0.369648	0.72477	0.467293
Gohir.D02G039200.1	0.334433	0.770915	0.93148	-0.587894	-0.499366	-0.949568		Gohir.D11G071400.1	-1.00864	-1.84309	-1.28239	1.61123	1.33211	1.19078
Gohir.D10G026801.1	0.099732	1.08643	1.19615	-0.917546	-0.923352	-0.541413		Gohir.D10G028600.1	-0.659288	-0.483782	-0.637437	0.603134	0.663478	0.513895
Gohir.A06G094300.3	0.998642	1.57011	1.48007	-1.10866	-1.40686	-1.53331		Gohir.A08G109100.1	-0.805152	-1.24703	-1.1561	0.467703	1.26138	1.4792
Gohir.D01G026300.2	0.824089	0.995616	1.00503	-0.912276	-0.92495	-0.98751		Gohir.A11G077400.1	-0.360573	-0.569715	-0.569715	0.557258	0.373644	0.5691
Gohir.A05G166300.1	0.759435	1.64915	2.0151	-1.96136	-1.13629	-1.32603		Gohir.D10G191975.1	-0.479161	-0.479161	-0.479161	-0.0462015	0.830597	0.653087
Gohir.A12G209500.1	2.5598	0.554579	0.334956	-1.39817	-1.19786	-0.853312		Gohir.D07G197200.1	-0.873576	-1.39938	-1.37017	0.490051	1.53582	1.61725
Gohir.D05G182700.1	1.20122	0.472213	0.426409	-0.518201	-0.790821	-0.790821		Gohir.A09G006500.1	-0.236329	-0.807987	-0.89212	0.853603	0.616666	0.466166
Gohir.A05G331100.1	0.847411	1.13697	0.952138	-1.2779	-0.813322	-0.845298		Gohir.A09G086566.1	-0.391429	-1.03205	-0.796936	0.538413	1.20765	0.474349
Gohir.D11G345900.1	0.241219	1.42221	1.41548	-0.886142	-0.983219	-1.20955		Gohir.A06G180000.2	-0.434726	-1.69274	-1.98507	0.780404	1.85263	1.47951
Gohir.A01G018300.1	0.76263	1.22386	0.925478	-0.87971	-1.02863	-1.00363		Gohir.D09G215700.1	-0.561042	-0.431045	-0.662628	0.894599	0.170175	0.589943
Gohir.D05G241066.1	1.08266	1.49392	1.23942	-1.09662	-1.30083	-1.41855		Gohir.A02G066401.1	-1.29155	-1.29155	-1.29155	0.539112	0.552836	2.7827
Gohir.D12G258700.1	0.115823	1.06666	0.889632	-0.760896	-0.5698	-0.741421		Gohir.A11G151200.1	-1.69124	-2.59386	-2.38596	2.25752	1.99673	2.41682
Gohir.A01G022900.1	0.902509	1.05267	0.894205	-0.927506	-0.940488	-0.981393		Gohir.A11G076600.1	-1.5483	-2.14938	-1.57254	1.53569	1.85928	1.87526
Gohir.A09G183900.1	1.83504	1.56857	1.06024	-1.35455	-1.46481	-1.64449		Gohir.A04G141400.1	-0.53915	-0.622554	-1.00306	0.776924	0.633808	0.754036
Gohir.A10G132575.1	0.243406	0.500817	1.73466	-0.826296	-0.826296	-0.826296		Gohir.A07G046200.1	-0.334312	-1.53783	-0.995842	0.417696	1.32296	1.12733
Gohir.D05G309100.1	1.5201	1.33216	1.25714	-1.60935	-1.42197	-1.07809		Gohir.D11G212800.1	-0.205824	-0.606659	-0.602977	0.349676	0.483259	0.582525
Gohir.A02G066300.1	1.18756	1.89333	1.47342	-1.41394	-2.06212	-1.07826		Gohir.A01G140100.1	-0.369628	-1.26813	-0.761129	1.01855	0.642404	0.73794
Gohir.A03G057100.2	0.621548	1.19585	0.931703	-0.823538	-0.966604	-0.958961		Gohir.A11G106300.1	-0.510521	-0.831585	-0.585022	0.801519	0.508798	0.61681
Gohir.A03G112300.1	1.30831	0.178632	1.09755	-1.14286	-0.599839	-0.841789		Gohir.A09G175400.1	-0.777952	-2.04811	-2.86112	1.30029	2.11902	2.26787
Gohir.D08G088600.1	1.55613	1.25814	1.13649	-1.80295	-1.10274	-1.04506		Gohir.A12G195200.1	-0.294245	-0.814514	-0.522355	0.77971	0.497025	0.354379
Gohir.D10G070300.1	1.18485	0.613849	0.629936	-0.863463	-0.768393	-0.796783		Gohir.D08G075700.1	-0.674053	-1.84865	-0.806961	1.21048	1.02461	1.09458
Gohir.D12G122100.1	0.321122	1.54363	1.09987	-0.90127	-1.07495	-0.988392		Gohir.A10G124901.1	-0.301726	-0.710872	-0.771612	0.708654	0.485399	0.590157
Gohir.D13G215600.1	0.381395	1.07846	1.49806	-0.765389	-0.987332	-1.20519		Gohir.A06G034600.1	-0.249537	-0.547022	-0.547022	0.462325	0.327972	0.553283
Gohir.A12G075300.1	0.752021	0.522729	0.839268	-0.744831	-0.804318	-0.564868		Gohir.D06G112600.2	-0.322188	-0.799182	-0.828217	0.600028	0.768337	0.581223
Gohir.A04G028404.1	0.848992	0.799455	0.299498	-0.703385	-0.541175	-0.703385		Gohir.D02G236100.1	-0.87067	-0.87067	-0.87067	0.37056	0.945725	1.29572
Gohir.D02G131900.1	0.750937	0.305944	0.532997	-0.509738	-0.661742	-0.418398		Gohir.A05G318800.1	-1.23398	-1.71844	-1.64952	1.19428	1.7022	1.70546
Gohir.A05G191600.1	1.90132	0.104344	0.561986	-0.851431	-0.881253	-0.834967		Gohir.D11G320300.1	-0.743582	-1.10221	-0.562807	1.00685	0.737648	0.664103
Gohir.A12G191900.1	0.38164	0.811398	0.35777	-0.374249	-0.507174	-0.669384		Gohir.A05G214400.1	-0.381527	-1.72458	-1.89808	1.45651	1.27404	1.27363
Gohir.D11G181000.1	1.16058	0.877086	0.720569	-0.819881	-0.914327	-1.02402		Gohir.A13G136900.1	-0.624265	-0.552249	-0.550949	0.437961	0.730382	0.55912
Gohir.D10G103300.1	1.30277	0.638633	0.589759	-0.7329	-1.05987	-0.738396		Gohir.A01G154800.1	-0.237593	-2.37957	-2.72967	1.88948	1.81338	1.64398
Gohir.D05G111000.1	0.566869	1.0367	1.25486	-0.826114	-1.08514	-0.947175		Gohir.D01G153650.1	-0.621647	-0.621647	-0.621647	0.630527	0.755755	0.478658
Gohir.D09G149700.1	-0.0954134	0.905453	1.69013	-0.84375	-1.18665	-0.46977		Gohir.A11G217600.1	-0.873598	-2.14209	-2.92114	1.43014	2.22772	2.27897
Gohir.A09G008400.1	0.991321	1.06953	1.07045	-0.931025	-1.12916	-1.07111		Gohir.D12G153200.1	-1.16797	-2.06932	-0.675934	1.38284	1.04935	1.48102
Gohir.A05G266700.4	1.0976	1.11919	0.774834	-0.916969	-1.07258	-1.00208		Gohir.D01G205700.1	-0.420785	-0.583314	-0.667197	0.489756	0.521912	0.659628
Gohir.A07G207500.1	1.54004	1.90212	1.49667	-1.115	-1.8787	-1.94513		Gohir.D09G159100.2	-0.864165	-2.2793	-0.78571	2.04594	0.887282	0.995951
Gohir.A10G067800.2	1.03841	0.524154	0.524154	-0.502259	-0.815931	-0.768528		Gohir.A02G020000.1	-0.64024	-2.15178	-1.07458	1.32354	1.71035	0.832708
Gohir.A11G306300.1	0.872473	0.919811	0.898666	-0.64829	-0.921584	-1.12108		Gohir.A07G155500.1	-0.455137	-1.75949	-2.01685	0.845835	1.72486	1.66078
Gohir.D08G178900.1	0.63427	1.32697	1.17513	-1.03071	-1.05097	-1.05468		Gohir.A07G159900.1	-0.552793	-0.905408	-0.887893	1.59654	0.622438	0.127118
Gohir.D09G066400.1	1.9611	0.611238	0.627927	-1.53547	-0.929804	-0.73499		Gohir.D05G183200.3	-0.305591	-1.50475	-1.07378	1.13474	0.822944	0.926439
Gohir.A12G246200.1	2.76056	2.45668	2.37939	-1.94981	-2.71137	-2.93544		Gohir.A13G220700.1	-1.11862	-1.87407	-1.44714	1.44842	1.62739	1.36403
Gohir.D12G142300.1	2.30548	0.723039	0.364826	-0.914565	-1.33394	-1.14483		Gohir.D06G034400.1	-1.50824	-0.304703	-0.908054	0.988466	1.21638	0.516147
Gohir.A10G077900.1	0.616689	1.17016	1.40759	-0.977438	-0.991295	-1.2257		Gohir.D11G069800.1	-0.979772	-1.26746	-0.761718	0.0965957	1.54594	1.36642
Gohir.A12G165700.1	1.83186	1.82334	1.52207	-1.1591	-2.09743	-1.92074		Gohir.A05G069900.1	-0.801423	-2.09222	-0.912092	1.71582	1.13119	0.958727
Gohir.A09G110000.1	0.732925	1.72848	1.20783	-0.716291	-1.59276	-1.36018		Gohir.A02G177600.1	-0.870859	-1.118	-1.54205	1.06419	1.31256	1.15416
Gohir.A09G076200.1	0.0845218	1.02499	0.830347	-0.499747	-0.688531	-0.751583		Gohir.A10G202300.1	-0.695918	-0.565333	-0.647912	0.025562	0.83714	1.04646
Gohir.A07G006600.1	1.81307	1.47652	1.34163	-1.38904	-1.69476	-1.54743		Gohir.A11G137400.1	-0.483005	-0.889021	-0.62454	0.852156	0.590902	0.553509
Gohir.A10G043200.1	0.453598	1.71301	1.71395	-0.712077	-1.78276	-1.38571		Gohir.A05G087000.1	-0.697572	-0.895062	-0.605555	0.611411	0.878627	0.708152
Gohir.A02G033000.2	0.758783	1.28497	1.23718	-0.850245	-1.28383	-1.14685		Gohir.D05G294100.1	-0.227732	-0.59194	-0.518744	0.583338	0.282773	0.472307
Gohir.A08G101900.4	0.979204	0.33563	0.684159	-0.694353	-0.610288	-0.694353		Gohir.D12G190700.1	-0.750759	-1.25057	-0.89869	1.25359	0.995508	0.650919
Gohir.A02G098000.2	0.871182	1.44201	0.55215	-0.855212	-1.10508	-0.905051		Gohir.D02G103666.1	-0.551222	-0.848707	-0.848707	-0.0747106	1.37255	0.950795
Gohir.D05G226300.1	0.898354	1.46306	1.53534	-1.23131	-1.55776	-1.1077		Gohir.A05G044300.1	-1.17013	-1.06896	-1.08016	0.885536	1.36445	1.06926
Gohir.A10G234700.2	0.652716	0.825437	0.696565	-0.65712	-0.744444	-0.773155		Gohir.A03G009600.1	-0.386157	-1.2134	-1.32738	1.06336	0.73101	1.13257
Gohir.D10G236700.1	0.492384	0.790624	0.491007	-0.493915	-0.541039	-0.739061		Gohir.A11G242800.1	-0.646733	-0.99101	-0.421713	0.286033	0.94018	0.833244
Gohir.A07G137300.2	1.06084	1.00592	0.94665	-1.02367	-1.12054	-0.869202		Gohir.A09G161750.1	-0.53104	-1.19643	-0.961319	0.772948	0.395725	1.52012
Gohir.A12G241500.1	1.10045	0.985795	0.992318	-0.855873	-1.05187	-1.17082		Gohir.A13G005400.1	-0.64863	-2.24411	-0.736205	0.33147	1.40692	1.89056
Gohir.A09G040900.1	2.27728	2.68017	-1.23936	-1.23936	-1.23936	-1.23936		Gohir.D06G080700.2	-0.634652	-0.634652	-0.542444	0.504818	0.381845	0.925085
Gohir.A11G091200.1	0.871114	1.81426	1.06525	-1.39067	-1.28059	-1.07936		Gohir.D10G254300.3	-0.297105	-0.597803	-0.498528	0.790482	0.289968	0.312985
Gohir.D04G004100.1	0.785251	1.0673	1.12255	-0.811252	-0.989489	-1.17436		Gohir.A06G006000.2	-0.491319	-0.682289	-0.860186	0.734421	0.626862	0.672511
Gohir.D05G064900.1	0.582772	1.06394	1.39477	-1.55197	-0.781686	-0.707832		Gohir.A12G033200.1	-0.827082	-1.75326	-1.94511	1.39607	1.46447	1.66491
Gohir.A05G381400.2	0.311346	1.12441	1.13778	-1.10525	-0.800035	-0.668255		Gohir.A05G177600.1	-0.704145	-1.5193	-1.19287	1.28783	1.12017	1.00832
Gohir.A07G064000.1	1.72516	1.14002	0.432574	-1.03591	-1.07246	-1.18938		Gohir.D05G134200.1	-0.437798	-0.974407	-0.943723	1.03518	0.620035	0.700716
Gohir.D10G161401.1	0.561786	1.28719	1.04045	-0.887244	-0.831555	-1.17063		Gohir.D04G037100.1	-0.657424	-1.88854	-2.40285	1.29555	1.60467	2.0486
Gohir.D06G002300.1	1.62662	1.87916	1.60526	-1.45334	-1.76075	-1.89694		Gohir.A11G219200.1	-1.26747	-1.19328	-1.17561	0.99458	1.52861	1.11316
Gohir.D01G030200.1	0.740708	0.812505	1.15097	-0.871458	-0.921546	-0.911181		Gohir.D12G108200.1	-0.913372	-1.35711	-1.40162	1.23589	1.23377	1.20244
Gohir.D13G210600.1	1.49867	1.02972	0.876415	-0.953377	-1.21794	-1.23349		Gohir.D12G155200.1	-0.741715	-0.393043	-0.352459	0.115136	0.687989	0.684092
Gohir.A11G093100.1	1.52013	0.740272	0.266702	-0.513306	-1.12231	-0.891485		Gohir.A03G132100.1	-0.703668	-0.922607	-0.98322	0.691569	0.784781	1.13314
Gohir.A12G197400.1	0.274741	1.1004	0.790515	-0.677204	-0.653383	-0.835073		Gohir.D08G186400.1	-0.713915	-1.94771	-1.23777	1.04774	1.4101	1.44155
Gohir.D13G209800.1	0.879486	0.516684	0.699689	-0.827324	-0.321607	-0.946927		Gohir.A07G016600.1	-0.825312	-0.963121	-0.973246	0.750451	0.988288	1.02294
Gohir.D05G093700.1	0.541985	1.39552	1.13472	-0.294939	-1.38614	-1.39115		Gohir.D12G114900.1	-0.347916	-0.566513	-0.566513	0.481559	0.606977	0.392406
Gohir.A01G152400.1	1.95229	0.705087	0.312288	-0.706864	-1.42817	-0.834639		Gohir.A13G127100.1	-0.348606	-0.496832	-0.583969	0.40354	0.452867	0.573
Gohir.D12G145400.1	1.46019	0.47438	0.501327	-0.785102	-0.892981	-0.75781		Gohir.D09G109600.1	-0.680165	-0.988147	-0.971202	0.791286	1.02156	0.826668
Gohir.D04G130000.1	0.942434	0.460147	0.44388	-0.435857	-0.75367	-0.656936		Gohir.A12G156700.1	-0.50631	-1.68488	-1.45837	1.36663	1.19262	1.0903
Gohir.D05G059100.3	1.1763	0.763459	0.680325	-0.879739	-0.872443	-0.867902		Gohir.A04G124300.1	-0.766882	-0.905696	-0.905696	-0.513928	1.45045	1.64175
Gohir.A12G021900.1	0.679176	1.52195	1.28562	-0.963164	-1.22348	-1.3001		Gohir.D02G118600.1	-0.946346	-1.91527	-2.11055	1.01424	1.95202	2.0059
Gohir.D11G295266.1	0.613842	0.718762	0.734248	-0.664115	-0.727753	-0.674983		Gohir.A05G074800.1	-0.736484	-1.20494	-0.961276	0.513059	1.10446	1.28518
Gohir.A01G064900.1	1.36488	1.08462	0.860681	-0.728857	-1.49588	-1.08545		Gohir.D10G105900.1	-0.272788	-0.557559	-0.541226	0.313671	0.472244	0.585657
Gohir.A06G143500.1	0.312195	1.29663	1.02738	-0.878736	-0.878736	-0.878736		Gohir.A03G091500.1	-0.845687	-1.88609	-1.02833	1.58231	1.13274	1.04506
Gohir.A08G221652.1	0.434444	1.54042	1.30803	-1.02714	-1.22764	-1.0281		Gohir.D11G269700.2	-0.91012	-1.96148	-2.02127	0.938451	2.06699	1.88743
Gohir.A02G045100.1	2.30942	1.37346	1.39249	-1.55809	-1.75009	-1.76718		Gohir.D13G085600.1	-0.507768	-0.507768	-0.507768	0.15033	0.649923	0.72305
Gohir.A11G098200.1	2.86301	-0.170899	1.09112	-1.26107	-1.26107	-1.26107		Gohir.A09G138300.2	-0.8725	-1.08164	-0.767815	1.31095	0.750641	0.660365
Gohir.D12G089200.1	2.10194	1.56473	0.545063	-1.24472	-1.48351	-1.48351		Gohir.A11G283300.1	-1.04911	-1.08897	-0.615003	0.250367	1.46993	1.03278
Gohir.A08G079100.1	2.80215	1.98134	2.24729	-2.59782	-2.21	-2.22296		Gohir.D07G031700.1	-0.446696	-0.925926	-0.925926	0.982887	0.853123	0.462539
Gohir.D07G084500.1	0.784571	0.947376	0.63886	-0.554635	-0.536611	-1.27956		Gohir.A10G043100.2	-0.298263	-0.612686	-0.481232	0.293802	0.639239	0.45914
Gohir.D09G110500.1	0.0678243	1.8433	0.810275	-1.18168	-0.583122	-0.956597		Gohir.D01G069600.1	-0.501149	-0.377205	-0.609138	0.483544	0.623377	0.380569
Gohir.A05G047100.1	0.233039	1.45106	0.951083	-0.754184	-0.991998	-0.888996		Gohir.A11G058000.3	-0.45864	-0.847792	-0.764037	0.799888	0.621717	0.648863
Gohir.D05G378100.1	1.37419	0.902808	0.416899	-0.530722	-0.792651	-1.37053		Gohir.A06G079500.1	-0.32399	-1.43564	-1.16168	1.16486	0.617829	1.13862
Gohir.A11G134700.1	1.02859	0.507757	0.834805	-0.871373	-0.643594	-0.856183		Gohir.D07G205100.1	-0.69414	-0.939681	-1.01651	0.677586	0.977361	0.995386
Gohir.A05G141600.1	0.0347186	1.28724	1.50203	-1.17434	-0.751103	-0.898544		Gohir.D05G007600.1	-0.773014	-1.00445	-1.00445	0.996274	0.601996	1.18364
Gohir.A12G234000.1	3.09596	0.205542	0.504093	-0.953863	-1.76649	-1.08525		Gohir.D13G121201.1	-0.487238	-2.52698	-3.71669	2.53499	2.37953	1.81639
Gohir.A06G006800.1	0.786214	1.91562	1.65923	-1.30369	-1.54354	-1.51383		Gohir.D01G117000.1	-1.24306	-1.24306	-1.24306	0.416411	1.63724	1.67552
Gohir.A07G197100.1	0.469842	1.20075	1.40599	-0.836386	-1.18688	-1.05332		Gohir.A01G183400.1	-0.779177	-0.779177	-0.779177	0.695908	1.13156	0.510067
Gohir.D12G269750.1	1.74174	0.543808	0.370665	-0.580906	-1.11488	-0.960432		Gohir.D10G215900.1	-1.47204	-0.997643	-0.616053	0.293899	1.45901	1.33283
Gohir.D05G273900.1	1.10636	1.46911	1.7205	-1.25408	-1.69101	-1.35088		Gohir.D04G106500.1	-0.904764	-1.98542	-1.74794	1.27482	1.78083	1.58247
Gohir.D06G019027.1	0.752278	0.302082	0.466288	-0.505824	-0.53699	-0.477834		Gohir.D12G128950.1	-0.984984	-1.18912	-1.04013	0.405042	1.45057	1.35862
Gohir.A03G204600.1	-0.00666692	1.21561	1.5112	-0.72129	-1.05344	-0.945404		Gohir.D11G288100.1	-0.637058	-1.81427	-1.69807	1.00378	1.56568	1.57994
Gohir.A05G169600.1	0.865001	1.40459	0.506746	-0.825275	-0.761976	-1.18909		Gohir.A12G151300.1	-0.804915	-1.33535	-1.36883	1.10168	1.12636	1.28105
Gohir.A03G160900.1	0.0280956	1.6221	1.48629	-0.732226	-1.07676	-1.3275		Gohir.A08G141500.1	-0.370304	-0.835519	-0.984778	0.500133	0.790062	0.900406
Gohir.D05G143200.1	1.77466	1.20593	1.55866	-1.47314	-1.44809	-1.61802		Gohir.D05G290600.1	-1.17629	-1.43716	-0.823716	0.756363	1.39574	1.28506
Gohir.A05G211300.1	0.805489	1.55464	1.77276	-1.78806	-1.04324	-1.30158		Gohir.A03G055700.1	-1.03592	-1.67211	-1.03356	1.47814	1.09069	1.17277
Gohir.A06G006600.1	-0.317959	1.34032	1.23832	-0.64669	-0.818821	-0.79517		Gohir.D13G040200.1	-0.842891	-1.19137	-0.394275	0.265811	0.987343	1.17538
Gohir.A05G165800.1	1.16722	1.29623	0.981877	-0.62037	-1.34597	-1.479		Gohir.A13G153300.1	-0.448567	-0.582531	-0.637635	0.364334	0.656835	0.647565
Gohir.A12G022900.2	1.01668	1.01961	1.05113	-0.902123	-0.995695	-1.18961		Gohir.A04G130800.1	-0.84995	-1.92679	-1.88692	0.981707	1.92677	1.75518
Gohir.D09G139500.3	-0.0619879	1.13154	1.24865	-0.672041	-0.650741	-0.995415		Gohir.D09G200700.1	-0.513371	-1.05508	-1.29179	1.3521	0.77089	0.737255
Gohir.A11G073300.1	2.39925	0.0645691	0.529628	-0.927364	-1.03304	-1.03304		Gohir.A05G135400.1	-0.435199	-1.00973	-0.783394	0.836189	0.488626	0.903506
Gohir.D03G110200.1	1.17061	1.28011	1.101	-1.09635	-1.19062	-1.26474		Gohir.D12G239500.1	-0.993249	-2.19985	-2.08735	1.18609	1.78401	2.31034
Gohir.D10G186200.1	1.96309	1.14221	0.620338	-0.802756	-1.6289	-1.29399		Gohir.A11G121700.1	-0.540207	-0.427151	-0.409557	0.180808	0.674743	0.521364
Gohir.D11G209200.1	0.500856	0.945395	1.42528	-0.864361	-1.01501	-0.992168		Gohir.D01G065300.1	-1.17726	-0.851512	-0.648031	0.172857	1.45425	1.0497
Gohir.A05G049700.1	0.775301	1.73044	1.45301	-1.29276	-1.43026	-1.23573		Gohir.A09G068700.1	-1.94845	-1.94845	-1.94845	3.13736	0.977928	1.73007
Gohir.A12G129000.1	0.309229	0.615563	1.63361	-1.19801	-0.563706	-0.796683		Gohir.A05G135600.1	-0.982124	-1.80937	-1.23348	1.25503	1.37555	1.39439
Gohir.D05G117700.1	0.563422	1.1512	1.04586	-0.878673	-0.999531	-0.882269		Gohir.D05G167700.3	-0.421622	-0.365981	-0.348717	0.504988	0.41111	0.220222
Gohir.D04G166600.2	2.98784	2.02861	1.72089	-1.8924	-2.60531	-2.23963		Gohir.D06G125400.1	-0.9681	-1.278	-0.847257	0.605936	1.28494	1.20248
Gohir.D05G258800.1	0.751787	1.43361	1.18733	-0.928991	-1.7298	-0.71394		Gohir.D07G036600.1	-0.53507	-2.03362	-2.05456	1.80309	1.39251	1.42765
Gohir.A02G062100.1	1.86141	1.31951	1.23748	-1.47151	-1.37138	-1.57551		Gohir.A08G224400.1	-0.628957	-0.959781	-1.11047	0.984937	0.886248	0.828026
Gohir.A05G407900.1	1.45496	1.68189	1.6187	-1.6243	-1.70954	-1.42172		Gohir.D12G136400.1	-1.44271	-1.44271	-1.44271	2.88015	2.89071	-1.44271
Gohir.D10G007100.1	-0.217933	1.36447	1.39428	-0.918053	-0.84806	-0.774703		Gohir.D02G239250.1	-0.693931	-0.693931	-0.693931	0.238886	1.18577	0.657132
Gohir.D13G166100.1	0.958846	0.439924	0.38453	-0.752167	-0.789097	-0.242035		Gohir.A06G034575.1	-0.63247	-1.22981	-1.46601	0.456823	1.40836	1.46311
Gohir.D13G185000.2	-0.410176	1.6408	1.474	-0.980568	-0.970661	-0.75339		Gohir.D12G155000.1	-1.08857	-1.25746	-1.23658	1.01653	1.24222	1.32386
Gohir.A10G069600.1	0.118724	1.6831	1.71331	-1.19862	-0.937396	-1.37912		Gohir.D05G217700.1	-0.660839	-1.37426	-1.63805	1.46345	1.06795	1.14175
Gohir.D01G181300.1	2.15374	1.08496	0.805928	-1.46696	-1.32095	-1.25671		Gohir.A01G184500.1	-0.986181	-0.906702	-1.04976	0.550839	1.17709	1.21471
Gohir.A06G160175.1	1.50073	0.765037	0.485892	-0.84836	-0.872833	-1.03047		Gohir.A08G204800.2	-0.581461	-1.28348	-0.408242	0.654543	0.781727	0.836912
Gohir.A11G238100.1	1.44818	1.08629	0.569146	-1.32977	-0.755736	-1.0181		Gohir.D11G131801.1	-0.693602	-1.17461	-0.864859	1.24528	0.852591	0.635196
Gohir.A03G026700.1	0.767371	0.414979	0.185074	-0.441215	-0.442449	-0.483761		Gohir.D13G062100.1	-0.632316	-1.5152	-2.13023	1.17346	1.57695	1.52734
Gohir.D05G169500.3	0.623018	0.586634	1.21589	-0.732701	-0.804386	-0.888451		Gohir.D02G182800.1	-0.670137	-1.09718	-1.61336	1.07149	1.26766	1.04152
Gohir.D05G143100.1	2.15768	0.686802	1.25022	-1.51347	-1.41121	-1.17003		Gohir.A12G274900.3	-0.69317	-1.31999	-1.3739	0.810029	1.34189	1.23515
Gohir.D02G047600.1	0.0637126	1.61343	1.73903	-1.10427	-1.15628	-1.15561		Gohir.A07G099700.1	-1.1226	-1.06329	-0.72369	-0.358529	1.63112	1.63698
Gohir.D12G118100.1	0.625806	1.40989	1.71884	-1.35934	-1.21151	-1.18368		Gohir.D13G099000.1	-0.504056	-1.11853	-0.779393	0.385836	0.866241	1.1499
Gohir.D10G070750.1	-0.077422	1.49085	1.21166	-0.850192	-1.0767	-0.698189		Gohir.D10G194300.1	-0.548793	-1.27875	-0.81164	0.829539	0.628607	1.18104
Gohir.A11G096100.1	2.48208	0.456784	1.21018	-1.71269	-0.989864	-1.44648		Gohir.D01G170800.1	-0.738703	-2.3869	-2.4706	1.79127	2.12313	1.68181
Gohir.A05G272900.1	1.33882	1.29342	0.94085	-1.29789	-1.09441	-1.18078		Gohir.A11G107100.1	-0.617637	-0.863616	-1.64267	0.757872	1.06442	1.30163
Gohir.A01G184800.1	0.495617	0.559935	0.936093	-0.617506	-0.638939	-0.735201		Gohir.A10G092300.1	-0.41271	-0.587294	-0.571129	0.173851	0.769167	0.628115
Gohir.A12G136800.3	-0.073437	0.917992	1.05979	-0.514824	-0.749516	-0.640003		Gohir.D03G099900.1	-0.755465	-0.929232	-0.680697	0.401326	0.992966	0.971103
Gohir.D01G041200.1	2.03151	0.578393	-0.0741218	-0.589779	-0.964649	-0.981357		Gohir.A10G168400.1	-0.421228	-0.886581	-0.580494	0.653038	0.4788	0.756465
Gohir.D12G073400.1	0.62643	1.08534	1.23148	-0.935723	-1.05663	-0.950889		Gohir.D10G189500.1	-0.810094	-1.86745	-1.79546	0.402951	2.23111	1.83894
Gohir.D11G277300.1	0.684545	1.28583	1.53698	-1.19979	-1.14375	-1.16382		Gohir.D13G102000.1	-0.323726	-0.439903	-0.589163	0.193246	0.535827	0.623718
Gohir.A01G122800.1	0.843642	1.79766	1.91995	-1.67889	-1.44222	-1.44014		Gohir.D07G204000.1	-0.372615	-1.59866	-0.974993	0.345951	1.27633	1.32399
Gohir.A08G200700.1	0.664791	1.24578	1.02035	-0.768432	-1.31405	-0.848448		Gohir.D02G017400.1	-0.497408	-1.19607	-0.807606	0.28884	0.962589	1.24966
Gohir.A05G222300.1	-0.124719	1.3896	1.3878	-0.73332	-0.995767	-0.923588		Gohir.D12G276100.1	-1.72203	-1.19755	-0.364612	0.19045	1.55257	1.54118
Gohir.D09G020100.1	1.5561	1.48072	1.12477	-1.22983	-1.52523	-1.40653		Gohir.A13G122600.1	-0.846127	-1.50038	-1.02817	1.48353	1.07438	0.816758
Gohir.A10G227800.1	1.34377	1.75764	1.94851	-1.87192	-1.52713	-1.65086		Gohir.D07G143200.1	-0.249326	-0.621399	-0.791181	0.66415	0.51756	0.480195
Gohir.A07G175800.1	1.14954	1.31577	0.994223	-0.919076	-1.26729	-1.27317		Gohir.D09G094200.1	-0.919773	-1.62292	-1.12666	1.24202	1.16319	1.26415
Gohir.A09G189400.1	0.545101	0.997662	0.844646	-0.414214	-1.04292	-0.930274		Gohir.A05G338300.4	-0.405576	-0.655946	-0.597424	0.527044	0.573633	0.55827
Gohir.D13G197400.1	0.937319	0.682684	0.0689049	-0.536731	-0.506316	-0.64586		Gohir.D11G132100.1	-0.903372	-2.29594	-2.37481	1.74131	1.98633	1.84647
Gohir.A08G142900.1	0.123042	0.569348	0.575344	-0.424656	-0.341972	-0.501108		Gohir.A03G030200.1	-0.656424	-1.45663	-1.31166	1.28044	1.24002	0.904251
Gohir.A01G196300.1	0.462567	0.495466	0.292816	-0.43896	-0.485015	-0.326874		Gohir.A07G139200.2	-0.657996	-0.561187	-0.767271	0.58368	0.751155	0.651619
Gohir.A09G235700.2	1.50652	1.7035	1.45947	-1.32491	-1.86398	-1.4806		Gohir.D11G039900.1	-0.614739	-0.391681	-0.429103	0.423781	0.23494	0.776801
Gohir.A11G311800.1	0.383744	1.31642	1.2476	-1.26485	-0.878892	-0.804024		Gohir.D05G012500.1	-0.388087	-1.84651	-1.01877	1.05542	1.08804	1.10991
Gohir.A01G011500.1	0.642247	0.463146	0.0625024	-0.385904	-0.457537	-0.324454		Gohir.D04G050100.1	-0.475986	-0.946028	-1.01007	0.634962	0.887313	0.909813
Gohir.D08G136400.1	0.55885	1.53831	0.990528	-0.976006	-0.968319	-1.14336		Gohir.A03G021200.3	-0.146021	-1.63513	-1.28748	0.829056	1.11999	1.11959
Gohir.A03G158000.1	3.02352	1.01208	0.945592	-1.32526	-2.1897	-1.46624		Gohir.D04G040300.1	-1.90198	-1.87376	-2.21253	1.27378	2.80732	1.90718
Gohir.D03G086900.1	0.214889	0.660188	1.32774	-0.86425	-0.754766	-0.583803		Gohir.D01G005500.1	-0.623126	-1.3377	-0.937163	0.898638	0.855755	1.1436
Gohir.A11G248300.1	2.31865	1.90318	0.903944	-1.57696	-1.70425	-1.84456		Gohir.A06G069700.1	-0.83378	-1.22893	-1.09076	1.3228	1.12777	0.702892
Gohir.A03G171800.1	0.724582	2.05537	1.48835	-0.782327	-1.90013	-1.58584		Gohir.D10G024000.1	-0.571266	-1.17971	-1.02946	0.639074	1.20265	0.938717
Gohir.D11G287900.1	0.454982	0.669769	0.4569	-0.575405	-0.555935	-0.45031		Gohir.A05G382100.1	-0.766373	-1.12614	-0.971984	0.671705	1.18019	1.0126
Gohir.D01G106900.1	0.939899	0.630388	0.61708	-0.628318	-0.816852	-0.742195		Gohir.A13G126100.1	-1.1599	-1.49351	-0.770306	0.350303	1.56991	1.50351
Gohir.D06G062000.1	0.591984	1.38778	1.40504	-1.08977	-1.20525	-1.08977		Gohir.A05G401550.1	-1.29262	-1.72218	-2.06095	1.22887	2.00106	1.84582
Gohir.A06G066750.1	0.854477	1.30074	0.358841	-0.920293	-0.761442	-0.832325		Gohir.D12G238700.1	-0.754252	-0.747427	-0.84423	0.952554	0.763908	0.629447
Gohir.D10G048100.1	0.804338	0.657647	0.489106	-0.650364	-0.650364	-0.650364		Gohir.A12G004900.1	-0.431025	-0.339029	-0.867998	0.164454	0.617142	0.856456
Gohir.A10G241480.1	0.815255	0.417391	0.389815	-0.707011	-0.537387	-0.378063		Gohir.D02G020600.1	-0.868529	-1.27811	-1.43314	0.335775	1.69822	1.54579
Gohir.A12G252500.1	0.734908	1.30395	1.46634	-0.905906	-1.56332	-1.03598		Gohir.A07G032400.1	-1.11715	-0.691156	-1.07958	0.660181	1.1785	1.0492
Gohir.D13G044350.1	0.2372	0.66921	0.830674	-0.447718	-0.322902	-0.966463		Gohir.A03G038900.1	-0.905876	-1.10974	-0.902409	-0.0391691	1.44352	1.51367
Gohir.D06G033600.1	0.347583	0.965697	1.14	-0.846236	-0.557726	-1.04932		Gohir.D03G081400.1	-0.557537	-0.554515	-0.370574	0.919295	0.383297	0.180034
Gohir.D01G147500.7	0.683378	0.819689	0.23174	-0.272705	-0.801524	-0.660577		Gohir.A13G234800.1	-0.609	-0.725122	-0.917767	1.04337	0.889587	0.318933
Gohir.D13G094300.1	0.452872	1.27304	0.821992	-0.849301	-0.849301	-0.849301		Gohir.A03G076000.1	-0.857407	-0.427262	-0.955007	0.833825	1.00975	0.396105
Gohir.A03G012200.1	1.08668	0.942484	1.21993	-0.604279	-1.37158	-1.27323		Gohir.D08G185600.2	-0.964633	-1.10398	-0.302744	0.458048	0.617375	1.29593
Gohir.A06G032612.1	1.13963	0.743068	1.08374	-1.39167	-0.717716	-0.857053		Gohir.A02G022000.1	-0.745449	-1.10167	-0.860926	1.28136	0.665033	0.761646
Gohir.D10G245200.2	1.99208	1.73183	1.19336	-1.46054	-1.94834	-1.50839		Gohir.D10G187700.1	-0.475674	-0.505544	-0.326393	0.77051	0.239608	0.297493
Gohir.D06G023600.1	1.73743	1.64985	1.24128	-1.14994	-1.7018	-1.77682		Gohir.D09G122200.1	-0.741616	-0.930788	-0.673712	0.800717	0.54441	1.00099
Gohir.D05G225600.2	0.664384	1.47643	0.951053	-0.697354	-1.45768	-0.936827		Gohir.A13G009300.1	-1.01794	-1.23981	-0.751001	0.864925	0.972583	1.17125
Gohir.D10G202300.1	0.157934	1.24453	0.980228	-0.718418	-0.790103	-0.874167		Gohir.A10G183000.1	-0.785124	-1.62501	-1.17942	0.12683	1.97401	1.48872
Gohir.D03G017100.1	1.8148	1.3815	0.917741	-1.18278	-1.366	-1.56527		Gohir.D09G102800.1	-0.315508	-1.31086	-0.888875	0.682861	0.779768	1.05261
Gohir.D09G203900.1	0.0243801	1.48448	1.53557	-0.622493	-1.47972	-0.942215		Gohir.D06G103600.2	-0.652527	-0.954466	-0.737359	0.68597	1.05703	0.601351
Gohir.D12G022700.2	1.61837	1.02282	0.486127	-1.08038	-1.10628	-0.940653		Gohir.D12G023900.3	-0.468497	-0.728816	-0.700818	0.615553	0.765091	0.517487
Gohir.A13G069300.1	0.90897	1.01358	0.820005	-0.480727	-1.3051	-0.956728		Gohir.A07G054400.1	-0.403066	-1.06461	-1.01892	0.56479	0.972935	0.948869
Gohir.D11G037700.1	0.903013	0.759206	0.700792	-0.759952	-0.900762	-0.702297		Gohir.D12G216500.1	-0.632411	-1.10052	-0.550824	0.377001	0.904365	1.00239
Gohir.A12G261500.1	0.76369	1.5321	1.27927	-0.840074	-1.45884	-1.27613		Gohir.D11G231000.1	-1.21898	-0.447088	-1.02251	0.675873	1.14206	0.870645
Gohir.A07G119600.1	0.33643	1.78612	1.63191	-1.06916	-1.30984	-1.37545		Gohir.A12G151200.1	-0.843732	-1.32403	-1.06262	0.780461	1.15631	1.29361
Gohir.D05G282800.1	1.12282	0.765894	0.4224	-1.05827	-0.502733	-0.750117		Gohir.D02G132532.1	-0.432192	-0.382842	-0.559165	0.4365	0.733028	0.204671
Gohir.A07G002400.1	2.06094	-0.0702328	0.630688	-0.884557	-0.747054	-0.989781		Gohir.D05G216400.2	-0.708459	-0.797957	-0.647397	0.284064	0.981093	0.888656
Gohir.D05G121700.1	0.900303	0.0138766	0.743275	-0.574719	-0.557363	-0.525373		Gohir.A11G207980.1	-0.50996	-0.542554	-0.703418	0.733671	0.541254	0.481007
Gohir.D03G102800.1	2.16956	0.217534	1.14604	-1.25436	-1.00148	-1.2773		Gohir.D03G020050.1	-0.454846	-0.360322	-0.509477	0.389307	0.732055	0.203283
Gohir.A08G217200.1	0.994835	0.812198	0.429251	-0.714039	-0.740674	-0.781572		Gohir.A11G067500.1	-0.883543	-2.0398	-0.989153	1.6753	1.21164	1.02555
Gohir.D01G055700.1	1.45149	0.585574	1.10466	-1.34062	-0.711678	-1.08943		Gohir.A01G004700.1	-1.21188	-2.09488	-0.978369	1.83727	1.37293	1.07492
Gohir.D06G050800.1	2.46948	0.387021	0.583266	-1.7111	-1.21219	-0.51648		Gohir.D05G098200.1	-1.16508	-1.71818	-1.17664	0.847432	1.62877	1.58369
Gohir.1Z049436.1	0.627581	0.470018	0.50395	-0.435335	-0.614694	-0.55152		Gohir.A05G141401.1	-0.352979	-0.71406	-0.476615	0.734819	0.261383	0.547452
Gohir.D08G235300.2	0.386648	1.08014	1.23777	-0.545111	-1.2119	-0.947542		Gohir.A06G147100.1	-0.222586	-1.24531	-1.29962	1.17561	1.05343	0.538475
Gohir.D03G118800.1	1.88235	1.39555	1.2357	-0.565539	-2.04717	-1.9009		Gohir.A12G083366.1	-0.590605	-0.822037	-0.643163	0.668019	0.476035	0.911751
Gohir.A05G336300.4	0.952946	1.5409	1.16514	-1.61616	-1.38357	-0.659261		Gohir.D05G139600.1	-0.349055	-0.85507	-0.807481	0.972253	0.299526	0.739828
Gohir.A13G173300.1	2.00037	1.13733	0.773199	-1.18808	-1.31938	-1.40344		Gohir.A05G103100.1	-0.634307	-0.275911	-0.634307	0.516902	0.316534	0.711089
Gohir.D02G005800.1	1.20429	0.743628	0.161084	-0.849832	-0.693525	-0.565647		Gohir.A06G176800.2	-1.05796	-1.684	-2.62998	1.55691	2.14295	1.67209
Gohir.D06G037400.1	-0.157151	1.37534	1.50346	-1.07142	-0.813196	-0.837035		Gohir.D08G197000.1	-0.348806	-0.628345	-0.689084	0.468607	0.620675	0.576953
Gohir.D06G178300.2	1.11745	0.891689	0.216696	-0.711984	-0.735601	-0.778245		Gohir.A11G058400.1	-0.962037	-1.20439	-0.392671	1.37707	0.64613	0.535893
Gohir.D07G187900.1	1.70663	0.845099	0.472593	-1.03276	-1.11193	-0.879635		Gohir.A11G097700.6	-0.629098	-0.99217	-1.0961	0.758731	1.07404	0.884597
Gohir.D05G077400.2	2.44399	0.390585	0.0531603	-0.741012	-1.07464	-1.07209		Gohir.A11G277600.1	-0.525999	-1.12794	-1.40388	0.598521	1.40796	1.05134
Gohir.A05G330400.1	1.14911	0.811222	0.725355	-0.767702	-0.909698	-1.00828		Gohir.D10G014600.1	-0.366071	-1.90296	-2.01049	1.47337	1.4282	1.37795
Gohir.A02G130400.1	-0.0640777	1.23256	1.28799	-0.842286	-0.771897	-0.842286		Gohir.A12G048900.2	-0.351033	-2.04353	-1.47949	1.24924	1.40199	1.22282
Gohir.A07G042800.1	1.24753	1.22603	0.915216	-1.06006	-1.15614	-1.17257		Gohir.A06G098600.1	-1.17052	-1.65282	-0.851231	1.14992	1.17612	1.34854
Gohir.D13G073900.1	0.697411	0.540745	0.720811	-0.636566	-0.80957	-0.512831		Gohir.D11G154300.1	-0.769203	-1.79472	-1.97873	1.65752	1.43765	1.44748
Gohir.A08G045265.1	0.418909	0.519813	0.293548	-0.371284	-0.498283	-0.362703		Gohir.A05G009300.1	-1.1279	-1.81043	-2.56425	2.09875	1.87414	1.52969
Gohir.A06G159400.1	0.912068	0.556995	0.0849644	-0.459629	-0.482501	-0.611898		Gohir.A11G188800.2	-0.471902	-0.610716	-0.474525	0.465158	0.454166	0.637818
Gohir.D03G102000.1	0.881167	1.06483	0.848352	-0.602866	-1.05743	-1.13405		Gohir.A10G064500.1	-0.689112	-2.13963	-2.11924	1.80329	1.65915	1.48555
Gohir.A07G231800.1	1.18725	1.22539	0.224475	-0.636811	-1.09562	-0.904693		Gohir.D06G149400.2	-0.251057	-0.956972	-0.92765	0.411802	1.07772	0.646161
Gohir.D07G007300.1	1.36695	1.00481	0.819977	-0.830247	-1.18074	-1.18074		Gohir.A11G299900.1	-0.467386	-0.974292	-0.752725	0.667716	0.775456	0.751231
Gohir.A07G010000.1	0.821574	0.265021	0.530904	-0.756812	-0.347285	-0.513401		Gohir.A07G219100.1	-0.428829	-0.33311	-0.641723	0.385421	0.387296	0.630944
Gohir.A05G359400.2	0.987365	1.92255	1.18899	-1.00514	-1.47983	-1.61393		Gohir.A13G089000.2	-0.311244	-0.301814	-0.433339	0.355699	0.452899	0.237799
Gohir.A12G146800.1	0.20155	0.631891	0.658627	-0.274676	-0.60563	-0.611762		Gohir.D03G069900.1	-0.902856	-0.830491	-0.561686	0.272788	1.11434	0.907909
Gohir.A05G213100.1	2.15887	0.83904	0.689374	-1.44441	-1.07836	-1.16451		Gohir.D06G142000.1	-0.536512	-1.58861	-1.45283	0.886209	1.34159	1.35015
Gohir.D08G188832.1	1.95613	0.757146	0.843107	-1.18546	-1.18546	-1.18546		Gohir.D10G036700.1	-0.393915	-1.14944	-0.958528	0.683678	0.8431	0.975108
Gohir.A11G224800.1	0.855572	1.77915	1.33101	-0.964937	-1.82729	-1.17351		Gohir.A09G090000.1	-0.597881	-1.10873	-1.16175	0.947781	0.984594	0.935985
Gohir.A11G105600.1	1.1218	1.35754	1.05148	-0.640977	-1.48962	-1.40022		Gohir.D11G061400.1	-0.973444	-1.46366	-0.570798	1.09206	1.06576	0.850074
Gohir.D02G142700.1	0.175935	1.48666	1.00773	-1.20195	-0.69548	-0.772894		Gohir.A11G113300.1	-0.33154	-1.14268	-0.804911	1.13302	0.716579	0.429537
Gohir.A09G162200.1	1.54015	0.679826	0.652611	-1.36648	-0.696064	-0.810045		Gohir.A12G093625.1	-0.574801	-0.756004	-0.861682	0.583515	0.998685	0.610286
Gohir.A11G273400.1	2.40409	1.85907	-0.0201416	-1.11131	-1.59084	-1.54087		Gohir.D10G066000.1	-0.614115	-2.14543	-2.01886	1.90092	1.51785	1.35964
Gohir.D11G270300.2	0.782166	0.426994	0.309539	-0.308391	-0.627251	-0.583056		Gohir.A13G047500.1	-0.879192	-0.95433	-0.818091	0.712556	0.958365	0.980692
Gohir.D07G027000.1	1.32082	1.36123	1.22953	-1.42781	-1.17471	-1.30906		Gohir.A13G186500.1	-0.619789	-0.343215	-0.571399	0.177587	0.418701	0.938116
Gohir.A10G225966.1	1.98888	2.08893	1.58125	-2.27663	-1.95701	-1.42543		Gohir.A09G095200.1	-0.976657	-1.88715	-2.39681	1.40007	1.88056	1.97999
Gohir.D07G070000.1	0.678115	1.66214	1.42712	-1.14574	-1.64526	-0.976381		Gohir.A11G192960.1	-0.356677	-1.77775	-1.02361	1.42381	0.880962	0.853264
Gohir.A08G143200.1	1.99385	0.47785	0.267964	-0.461456	-1.06373	-1.21447		Gohir.A01G078300.1	-1.32332	-1.03823	-0.790956	-0.0365595	1.8112	1.37787
Gohir.D02G225900.1	0.87067	1.47899	1.5043	-0.743679	-1.49738	-1.6129		Gohir.A05G077950.1	-0.338581	-0.689079	-0.312788	0.431273	0.320269	0.588906
Gohir.A13G116750.1	0.130315	0.854993	0.793696	-0.603693	-0.69954	-0.47577		Gohir.A08G156100.1	-1.07929	-1.7435	-0.582835	0.639399	1.29234	1.47388
Gohir.D12G104000.1	0.600951	1.66345	2.12051	-1.35138	-1.2159	-1.81763		Gohir.A13G057800.1	-0.911618	-1.00148	-0.565321	0.443855	1.15555	0.879015
Gohir.D13G215800.1	0.476386	0.466838	0.600912	-0.517283	-0.585842	-0.441011		Gohir.A04G055600.1	-0.567592	-0.996025	-0.431139	0.419013	0.778839	0.796903
Gohir.A12G102900.1	2.98876	0.750117	0.46329	-1.39455	-1.40248	-1.40513		Gohir.D09G204800.1	-0.868502	-1.94506	-1.86782	1.49177	1.47704	1.71258
Gohir.A07G125600.1	0.400642	1.19012	0.907478	-0.601941	-0.996781	-0.899514		Gohir.D05G094900.2	-0.427756	-1.23591	-1.18225	0.558478	1.25413	1.0333
Gohir.A03G125900.1	1.44359	1.08232	0.13649	-0.904702	-0.763405	-0.994297		Gohir.A05G067700.1	-0.707818	-1.95481	-0.706553	1.04031	1.27563	1.05325
Gohir.D13G128100.1	1.66983	1.16127	1.38241	-2.06238	-1.06326	-1.08787		Gohir.D11G220000.1	-0.700714	-0.700714	-0.700714	-0.150798	1.05332	1.19962
Gohir.A11G071200.1	0.500238	0.806924	0.97916	-0.514303	-0.874286	-0.897733		Gohir.D01G128400.2	-0.621822	-0.448875	-0.855887	-0.0425412	1.09035	0.878776
Gohir.A01G193300.3	0.976979	1.1096	0.814509	-0.540525	-1.28123	-1.07933		Gohir.D01G073500.1	-0.427638	-2.18408	-1.13167	1.49463	1.19064	1.05812
Gohir.A11G248900.1	0.470168	0.714654	0.281758	-0.48886	-0.48886	-0.48886		Gohir.A11G135700.1	-0.150499	-1.4081	-1.10558	0.934152	0.821105	0.908918
Gohir.D07G010300.1	0.858874	0.200382	0.483165	-0.669175	-0.48682	-0.386426		Gohir.A05G157800.2	-1.15496	-2.59749	-2.41777	1.57575	2.26863	2.32585
Gohir.D05G128100.1	2.34981	0.596866	0.697243	-1.2734	-1.22101	-1.14951		Gohir.D12G192700.1	-0.787171	-1.76027	-2.16735	1.29327	1.67784	1.74367
Gohir.D11G021300.1	1.15349	1.07578	1.27073	-1.23521	-1.06786	-1.19693		Gohir.A09G006200.1	-1.07245	-1.16766	-0.844417	0.802208	1.29139	0.990936
Gohir.D05G124400.1	0.261766	1.85735	1.76621	-0.740298	-1.71538	-1.42964		Gohir.D12G154600.1	-0.756609	-0.756609	-0.756609	0.140244	1.59106	0.538526
Gohir.A10G097800.1	0.216159	0.952141	0.685137	-0.618137	-0.413022	-0.822277		Gohir.A03G214100.1	-1.28902	-0.85466	-0.648547	0.00832046	1.68704	1.09687
Gohir.A03G100200.1	1.07043	1.08726	0.00380609	-0.510707	-0.941918	-0.708877		Gohir.A12G084825.1	-1.7444	-1.71941	-0.569891	0.781919	1.80337	1.44842
Gohir.A03G125800.1	0.968637	0.996542	0.882967	-1.17152	-0.600965	-1.07566		Gohir.A10G083300.1	-0.368757	-0.961742	-1.06742	1.05094	0.647594	0.699387
Gohir.A03G075266.1	0.142306	1.0985	1.74149	-0.96119	-0.948417	-1.07269		Gohir.D10G014200.1	-0.694727	-1.62731	-1.28135	1.70731	0.942467	0.953606
Gohir.A05G355900.1	0.597523	1.10328	1.00194	-0.912781	-0.77365	-1.01632		Gohir.A08G016600.2	-0.372979	-0.58212	-0.504877	0.0585007	0.516838	0.884637
Gohir.D01G215900.1	2.26153	1.26364	1.07498	-1.14648	-1.73894	-1.71472		Gohir.A08G210200.1	-0.504277	-1.53702	-2.12619	1.17361	1.67505	1.31882
Gohir.A13G074600.1	0.902632	-0.0507303	0.595583	-0.484002	-0.461319	-0.502164		Gohir.A09G220066.1	-1.06384	-1.51464	-1.06755	0.254516	1.82715	1.56436
Gohir.D01G140400.1	0.419809	0.608812	0.85534	-0.645186	-0.860553	-0.378221		Gohir.A07G188800.1	-1.16942	-1.8322	-0.240912	0.579281	1.49156	1.17169
Gohir.A08G167200.1	0.357507	0.632591	0.803991	-0.621693	-0.570735	-0.601661		Gohir.A06G030325.1	-0.484398	-0.489974	-0.386254	0.112112	0.646514	0.602001
Gohir.D05G375300.2	0.582642	0.798099	0.353726	-0.405689	-0.731108	-0.59767		Gohir.A08G040100.1	-0.317911	-0.958241	-0.685082	0.243098	0.783188	0.934948
Gohir.D01G164000.2	2.04271	1.25779	1.12371	-1.67054	-1.52926	-1.22441		Gohir.A11G248800.1	-1.51634	-2.34861	-2.1654	1.01811	2.50543	2.50681
Gohir.A11G195900.1	0.765355	1.21147	0.868289	-0.73684	-1.02065	-1.08763		Gohir.D13G152264.1	-0.709591	-1.00641	-1.19753	0.825629	1.05225	1.03565
Gohir.D03G031800.1	0.785014	1.30365	1.59515	-1.48643	-1.04207	-1.15532		Gohir.D01G216500.3	-0.498229	-1.41462	-1.7496	1.26786	1.33634	1.05825
Gohir.A12G161600.1	1.69079	0.726131	0.305252	-0.787082	-0.880215	-1.05487		Gohir.D08G253300.1	-0.730288	-0.781116	-1.00562	0.478172	1.05823	0.980624
Gohir.D11G276600.1	0.133585	1.3667	1.15776	-0.519596	-0.826417	-1.31203		Gohir.A01G228700.2	-0.506021	-2.02487	-0.940394	1.05865	1.2847	1.12794
Gohir.D09G242600.1	1.12708	0.217562	0.532583	-0.724121	-0.524424	-0.628682		Gohir.D09G228400.1	-0.387699	-0.936605	-1.29105	0.651465	0.897903	1.06599
Gohir.D06G195366.1	1.28537	0.729956	0.485671	-0.776481	-0.896571	-0.827947		Gohir.A11G186000.1	-0.707227	-1.05891	-1.26114	0.143442	1.26828	1.61556
Gohir.D01G207000.1	0.479874	0.913866	0.635399	-0.572106	-0.482206	-0.974828		Gohir.A07G117900.1	-0.649606	-0.823523	-0.605212	0.533454	0.790909	0.753978
Gohir.A05G331600.2	0.390231	1.37358	0.704024	-0.743408	-0.820549	-0.903873		Gohir.D02G088600.1	-1.42862	-1.3661	-0.681617	0.442344	1.57362	1.46037
Gohir.A10G165300.1	0.984149	1.70334	1.20356	-1.17531	-1.03396	-1.68179		Gohir.D12G085300.2	-0.723472	-1.33456	-0.742255	1.19662	0.661301	0.942358
Gohir.A11G030750.1	1.91323	1.04129	0.49819	-0.875896	-1.28841	-1.28841		Gohir.D05G227400.3	-0.327086	-1.15676	-1.56872	1.42078	0.881376	0.750405
Gohir.A03G017400.1	1.4237	0.881802	0.42773	-0.939495	-0.962305	-0.831435		Gohir.D09G137000.1	-0.334766	-0.621823	-0.918626	0.448651	0.789171	0.637393
Gohir.D02G184350.1	0.334746	0.983071	0.86089	-0.989861	-0.439271	-0.749575		Gohir.A05G018300.1	-0.530449	-1.31129	-1.28363	1.07642	1.08187	0.967076
Gohir.D03G150700.1	0.384016	1.95999	1.86388	-1.37085	-1.35055	-1.48648		Gohir.D11G151600.1	-1.04317	-1.405	-1.3308	1.10399	1.5858	1.08917
Gohir.A05G179500.1	2.33814	1.4588	1.10423	-1.49529	-1.79178	-1.6141		Gohir.A07G232300.1	-0.373328	-0.491121	-0.485552	0.349792	0.596014	0.404194
Gohir.D09G184200.1	0.467975	1.54891	1.25723	-0.775505	-1.32731	-1.17131		Gohir.D04G013500.1	-0.614878	-1.50946	-1.53979	1.54103	1.13802	0.985073
Gohir.A05G180400.1	0.761647	1.54778	1.47818	-1.45454	-1.16773	-1.16534		Gohir.A10G029000.1	-0.369936	-0.688397	-0.688397	0.772083	0.362627	0.61202
Gohir.A04G090700.1	0.342636	1.68356	1.70403	-1.16535	-0.810139	-1.75474		Gohir.A04G134200.1	-0.320411	-0.550556	-0.624068	0.404967	0.700929	0.389139
Gohir.A01G062201.1	0.895941	0.984768	0.757346	-0.638814	-1.09749	-0.901748		Gohir.A06G051400.1	-0.767366	-1.62526	-1.76013	1.51532	1.32478	1.31266
Gohir.A10G240251.1	1.54128	0.623581	0.0710796	-0.939984	-0.887747	-0.408211		Gohir.D07G226100.1	-0.346442	-0.705839	-0.749274	0.690704	0.690704	0.420149
Gohir.D02G148800.1	1.29473	1.2684	1.25302	-1.12205	-1.4252	-1.26889		Gohir.D02G159400.1	-0.633918	-0.633918	-0.633918	0.313188	0.855112	0.733454
Gohir.A07G181600.1	1.45581	0.415023	0.952243	-0.985933	-0.563603	-1.27355		Gohir.D02G035200.1	-0.517782	-1.42444	-3.89266	1.74558	2.2133	1.876
Gohir.A02G139100.1	-0.0180294	1.38942	1.28698	-1.09642	-0.611557	-0.950392		Gohir.A01G181500.2	-0.712978	-1.80844	-1.42517	1.5344	1.48759	0.924585
Gohir.A04G068700.1	0.0327748	1.45782	1.81611	-1.04991	-1.18419	-1.07261		Gohir.A04G016700.2	-1.09831	-1.49347	-1.47564	1.05984	1.49285	1.51473
Gohir.D10G032600.1	0.880516	1.35837	1.21333	-0.969279	-1.36206	-1.12087		Gohir.D10G137832.1	-1.59309	-0.603344	-1.24476	0.893623	0.458778	2.08879
Gohir.D08G229900.1	0.901274	0.925769	0.817614	-0.542246	-1.01554	-1.08687		Gohir.A03G087000.1	-0.515314	-1.2053	-1.23556	0.691661	1.15821	1.10631
Gohir.A03G172900.1	0.740405	1.56242	1.87022	-1.72292	-1.49585	-0.954272		Gohir.A08G067200.1	-0.813575	-1.57109	-0.720002	1.10328	0.776864	1.22452
Gohir.A09G143300.1	0.189265	0.712744	1.05148	-0.614785	-0.74603	-0.592671		Gohir.D13G220600.1	-0.863885	-1.17686	-0.810166	0.6885	1.13183	1.03058
Gohir.A11G173900.1	1.54132	0.932109	0.555599	-0.922562	-0.812068	-1.2944		Gohir.D06G145400.1	-0.43577	-0.513013	-0.513013	0.38384	0.524018	0.553937
Gohir.A11G146100.1	0.395596	1.17841	0.371862	-0.824115	-0.492983	-0.628767		Gohir.A11G201900.1	-1.03338	-1.41411	-1.41411	0.643514	1.26846	1.94962
Gohir.D07G011600.1	4.51415	-0.479168	1.12893	-2.00894	-1.15561	-1.99936		Gohir.A07G027750.1	-0.631833	-0.782393	-0.782393	0.475825	1.09339	0.627406
Gohir.D10G031200.1	1.38657	0.99796	0.76281	-0.680638	-1.3816	-1.0851		Gohir.A01G137617.1	-0.950101	-1.99456	-1.52661	1.70389	1.46105	1.30633
Gohir.A10G230232.1	0.352343	1.53255	1.60379	-1.1113	-0.979259	-1.39813		Gohir.D04G000005.1	-0.478863	-0.911394	-1.23332	0.811072	0.972696	0.839812
Gohir.A04G070300.1	0.691176	0.355467	0.933101	-0.822327	-0.298638	-0.858778		Gohir.A13G077601.1	-0.542967	-0.298838	-0.473889	0.493902	0.526111	0.295681
Gohir.D11G196900.1	1.27179	1.563	1.54234	-1.30325	-1.42597	-1.64791		Gohir.A05G293500.1	-0.512824	-1.10804	-0.941091	1.11354	0.540336	0.908076
Gohir.A03G190600.1	1.45934	0.775812	0.727969	-1.09122	-0.982566	-0.889333		Gohir.D04G132100.15	-0.538732	-0.982696	-0.933973	1.086	0.878538	0.490861
Gohir.D04G109000.1	1.39924	1.77748	1.73645	-1.69094	-1.69662	-1.52562		Gohir.A13G216200.2	-0.760771	-1.12142	-1.12142	1.22114	0.641146	1.14132
Gohir.A11G283001.1	0.571802	1.01355	1.1157	-1.13262	-0.721283	-0.847151		Gohir.A08G204400.1	-1.5831	-2.21132	-1.69823	1.16339	2.51688	1.81239
Gohir.A03G204000.1	0.161287	1.45269	1.47952	-1.17705	-1.16333	-0.753119		Gohir.A11G265601.1	-0.696504	-0.9027	-0.86312	-0.210959	0.757345	1.91594
Gohir.D03G148800.1	0.494286	0.846922	0.684284	-0.706123	-0.543325	-0.776043		Gohir.D07G045366.1	-0.94863	-0.818046	-1.04623	1.14761	0.762617	0.902678
Gohir.D10G253550.1	0.738113	0.508525	0.333632	-0.59876	-0.434892	-0.546617		Gohir.A08G179100.1	-1.14575	-1.33232	-0.631782	0.293269	1.31903	1.49755
Gohir.D13G034500.2	0.287295	1.70316	1.2845	-0.761365	-0.92067	-1.59292		Gohir.D07G035901.1	-0.807197	-1.00506	-0.854503	0.460128	1.17572	1.03091
Gohir.A04G091000.1	1.84079	0.914428	0.626479	-1.09914	-1.23258	-1.04997		Gohir.D09G148800.2	-0.511313	-0.607896	-0.798195	0.316173	0.725869	0.875362
Gohir.A04G085500.1	0.87274	0.428018	0.507212	-0.365327	-0.780365	-0.662279		Gohir.D05G260150.1	-0.78896	-0.78896	-0.78896	0.0249748	1.59481	0.747093
Gohir.D04G008000.1	0.61818	0.566496	0.680691	-0.984233	-0.541836	-0.339298		Gohir.D06G153925.1	-1.05205	-1.05205	-1.05205	2.10127	2.10693	-1.05205
Gohir.A03G119200.1	0.424685	1.4038	1.8618	-0.982059	-1.40132	-1.30691		Gohir.A08G049901.1	-1.10103	-1.82437	-1.60281	0.973883	2.24893	1.3054
Gohir.D09G195200.1	1.41747	1.47405	0.144037	-0.985848	-1.40355	-0.64615		Gohir.A12G136500.1	-0.717186	-0.79088	-1.04009	1.1502	0.797484	0.600464
Gohir.D05G359800.1	0.156541	0.850753	1.34749	-1.08724	-0.805165	-0.462378		Gohir.A07G197700.2	-0.605899	-1.35511	-0.871212	0.318302	1.22729	1.28663
Gohir.A13G112600.1	0.480886	0.989855	0.785005	-0.721332	-0.805377	-0.729037		Gohir.A07G188640.1	-0.336179	-1.50406	-1.28888	0.710254	1.55982	0.859046
Gohir.D09G075300.1	0.631947	0.42838	0.866608	-0.733185	-0.460565	-0.733185		Gohir.A13G086490.1	-0.666579	-0.927993	-0.990873	0.87913	0.787932	0.918383
Gohir.D13G062900.3	0.171508	0.548958	0.988495	-0.700432	-0.619374	-0.389155		Gohir.D13G217900.1	-0.328361	-0.449523	-0.625845	0.597577	0.225354	0.580798
Gohir.D02G010800.2	0.123472	0.820683	0.592778	-0.516038	-0.475424	-0.545471		Gohir.A05G292950.1	-0.349845	-0.669835	-0.5517	0.889543	0.242486	0.439351
Gohir.A01G189100.1	0.242396	1.71478	1.75593	-1.15217	-1.30566	-1.25527		Gohir.D07G167000.1	-0.372518	-1.61587	-0.905527	1.18018	0.545965	1.16777
Gohir.A12G085500.1	0.102652	0.944672	1.61333	-0.966873	-0.791491	-0.902293		Gohir.A13G057100.1	-0.728873	-1.68749	-1.43986	1.47957	1.33484	1.04182
Gohir.D04G164000.1	1.87518	1.77005	1.83334	-1.67912	-1.83776	-1.96169		Gohir.D07G079625.1	-0.482801	-0.604791	-0.680666	0.208418	0.4899	1.06994
Gohir.D10G118200.1	0.314761	1.52039	0.895001	-0.976843	-0.776464	-0.976843		Gohir.D07G036300.1	-0.338389	-1.49746	-1.14549	0.727241	1.15525	1.09884
Gohir.A07G101600.1	1.03533	1.45381	1.10138	-1.17339	-1.29643	-1.1207		Gohir.A04G112024.1	-1.66112	-2.10154	-1.06662	-0.0147522	1.90835	2.93567
Gohir.A11G029700.2	1.54913	1.0079	0.806176	-1.0251	-1.26198	-1.07612		Gohir.D09G247800.1	-0.516404	-2.11635	-1.93032	1.03768	1.86155	1.66385
Gohir.A13G030600.1	0.459555	0.552664	0.386143	-0.412804	-0.492779	-0.492779		Gohir.A03G217550.1	-0.311684	-0.621342	-0.629589	0.577019	0.426608	0.558988
Gohir.D10G208900.1	-0.380154	1.7612	1.55515	-0.845864	-1.13431	-0.956026		Gohir.A06G146601.1	-0.394347	-0.334692	-0.579579	0.178297	0.683455	0.446867
Gohir.A05G045400.1	0.901547	0.984786	0.206235	-0.559087	-0.820919	-0.712562		Gohir.D12G049700.1	-0.460066	-0.64006	-0.706706	0.453894	1.05451	0.298432
Gohir.A12G082100.1	0.263779	0.725236	1.62222	-1.07483	-0.898958	-0.637447		Gohir.A10G176000.1	-0.537431	-1.87752	-1.89929	1.10592	1.65315	1.55516
Gohir.A10G193300.1	1.72205	1.09157	0.557792	-0.905047	-1.24399	-1.22237		Gohir.A09G050400.1	-0.699441	-1.35032	-1.15866	0.706994	1.19962	1.30181
Gohir.A01G018100.1	0.589663	0.974764	0.62303	-0.518495	-0.862541	-0.80642		Gohir.D06G216000.1	-1.08716	-1.92792	-2.88786	1.82202	2.03515	2.04577
Gohir.D03G159400.1	0.014782	1.49776	1.36416	-1.28825	-0.700658	-0.887794		Gohir.D11G093900.1	-0.950929	-1.44952	-1.52172	1.05209	1.58883	1.28125
Gohir.D10G245700.1	0.231509	1.3251	1.36599	-0.970552	-0.992434	-0.959605		Gohir.D03G175700.3	-1.07741	-1.86613	-1.76934	1.19613	1.76175	1.755
Gohir.D10G133200.2	-0.229641	1.58479	1.01906	-0.698419	-0.878567	-0.797227		Gohir.D12G223500.1	-0.734338	-1.28318	-1.29566	1.22409	1.08574	1.00335
Gohir.D01G065800.1	0.523503	0.858628	0.921737	-0.766183	-0.760923	-0.776762		Gohir.A04G147300.2	-0.839487	-0.907477	-0.877795	0.334972	1.11352	1.17626
Gohir.A12G030701.1	0.385205	1.36701	1.04667	-0.41933	-1.11573	-1.26383		Gohir.A05G290900.1	-1.44733	-2.24357	-1.71591	1.37103	2.17527	1.8605
Gohir.A11G104800.1	1.6666	0.275121	0.349729	-0.567571	-0.841633	-0.882247		Gohir.A09G153000.1	-0.691542	-0.8076	-0.961563	0.375414	1.158	0.927287
Gohir.A01G221625.1	0.239812	1.04678	1.1299	-0.451892	-0.78666	-1.17794		Gohir.D10G091700.1	-0.370679	-0.68914	-0.481248	0.443765	0.660791	0.436511
Gohir.D05G338150.1	0.909828	0.43178	0.517578	-0.424119	-0.620687	-0.81438		Gohir.D13G219900.1	-0.826707	-1.38642	-1.4921	1.23778	1.26022	1.20723
Gohir.D10G178700.1	0.552522	0.906839	0.988474	-0.860327	-0.752292	-0.835215		Gohir.D04G000700.1	-0.190029	-1.44678	-1.64678	0.870005	1.37604	1.03754
Gohir.A12G276000.1	0.875791	1.42345	0.930609	-0.769482	-0.937909	-1.52246		Gohir.A11G189100.1	-0.561795	-1.27378	-0.40022	1.26873	0.448386	0.518679
Gohir.D01G113100.1	0.702269	1.49815	1.26353	-1.13411	-1.00067	-1.32917		Gohir.A03G008900.2	-0.541658	-0.839143	-0.717465	0.142709	0.939906	1.01565
Gohir.D03G030200.1	0.863153	1.83416	1.41428	-0.604248	-0.914428	-2.59292		Gohir.D01G130000.1	-0.649782	-2.0019	-0.992083	1.60092	1.00875	1.03409
Gohir.A05G052100.1	1.07264	0.989867	1.67887	-1.49358	-1.05159	-1.1962		Gohir.A09G115000.1	-0.666766	-1.63985	-1.67882	1.56763	1.18617	1.23163
Gohir.D03G118300.1	1.26467	0.958973	1.06069	-1.22843	-0.963032	-1.09287		Gohir.A12G076600.1	-0.763706	-1.56397	-1.2372	1.32447	1.04399	1.19641
Gohir.A06G064800.1	1.34242	0.719206	1.03899	-1.2411	-0.626274	-1.23325		Gohir.D03G018500.2	-0.66088	-1.59595	-0.831727	0.353043	1.20248	1.53303
Gohir.D10G145000.1	1.02967	1.07759	1.0534	-0.570549	-1.2707	-1.31942		Gohir.D11G287100.1	-1.06027	-0.951722	-0.784044	0.290665	1.26655	1.23882
Gohir.D11G340400.4	0.988019	0.697866	1.01549	-0.730234	-1.20112	-0.770021		Gohir.A06G059650.1	-0.490354	-0.490354	-0.490354	0.477552	0.100368	0.893143
Gohir.D02G122500.1	0.691869	1.30368	1.33526	-0.919323	-1.20829	-1.2032		Gohir.A12G040100.1	-0.71019	-0.604512	-0.371053	0.285475	0.705568	0.694713
Gohir.A12G030900.1	-0.187423	1.32451	1.3281	-0.901828	-0.742832	-0.820528		Gohir.D11G090701.1	-1.30672	-1.07667	-1.09246	0.814122	1.02409	1.63764
Gohir.A10G222200.1	1.14656	1.50969	-0.0296134	-0.724541	-0.95105	-0.95105		Gohir.A12G041500.1	-0.387367	-0.636791	-0.727644	1.02382	0.32338	0.404603
Gohir.D09G244900.4	0.480342	0.617659	0.713243	-0.50944	-0.762531	-0.539273		Gohir.A10G152800.2	-0.258074	-0.514964	-0.470968	0.507848	0.366654	0.369504
Gohir.D03G024700.1	0.52309	0.265332	0.461742	-0.297539	-0.479314	-0.47331		Gohir.A05G371900.1	-0.578727	-0.876212	-0.451828	0.119453	1.03452	0.752794
Gohir.D13G017000.1	0.921866	0.496199	0.700677	-0.861322	-0.814859	-0.442562		Gohir.A11G246400.1	-0.508847	-1.15162	-0.934495	0.920096	0.87234	0.802522
Gohir.A12G227900.1	0.633209	0.80049	0.763764	-0.640083	-0.504021	-1.05336		Gohir.D09G157350.1	-0.630937	-1.17522	-1.15796	0.973459	1.12672	0.863938
Gohir.D09G240950.1	1.74415	1.08172	0.788524	-1.16195	-1.01383	-1.43861		Gohir.A01G205400.1	-0.385356	-1.14056	-0.934617	1.0308	0.708153	0.721582
Gohir.D05G225700.1	1.45971	1.41811	1.18988	-0.840486	-1.59454	-1.63267		Gohir.A13G176900.1	-0.690393	-2.36276	-2.35476	1.14154	2.20995	2.05642
Gohir.D03G026800.1	1.02554	1.25564	0.98449	-1.06238	-0.731681	-1.47161		Gohir.D07G224000.1	-1.62281	-0.927101	-1.33533	1.1243	1.49841	1.26253
Gohir.D04G158300.1	0.252208	1.3112	1.32411	-0.83123	-1.10354	-0.952748		Gohir.A12G054800.1	-0.692617	-1.90073	-1.10344	1.67284	1.1589	0.865053
Gohir.A12G226000.1	1.0437	0.468199	0.917283	-0.904976	-0.829665	-0.694542		Gohir.A05G334900.1	-0.884933	-0.901697	-0.861172	0.173252	0.998504	1.47604
Gohir.D12G262400.1	0.474289	1.82049	1.51954	-1.0681	-1.2871	-1.45912		Gohir.D10G020200.1	-0.735962	-1.07581	-1.04484	0.881935	1.12304	0.851637
Gohir.D11G230300.1	0.945041	1.89551	0.972655	-1.03101	-1.34531	-1.43689		Gohir.A02G003000.1	-1.44484	-0.918066	-1.09446	0.84846	1.51783	1.09108
Gohir.A05G182400.1	1.26402	1.67091	1.42952	-0.819599	-1.44429	-2.10056		Gohir.A12G190400.1	-0.846501	-0.968928	-1.18678	0.880516	0.819699	1.30199
Gohir.D11G129400.1	1.49198	1.11009	0.595201	-0.51738	-1.40772	-1.27217		Gohir.A05G003700.1	-0.652866	-0.408323	-0.904813	0.784605	0.494044	0.687353
Gohir.A06G095300.1	-0.134285	1.05042	0.871211	-0.545656	-0.610928	-0.630767		Gohir.A11G002500.1	-0.234924	-1.06326	-1.04567	0.914442	0.570599	0.858808
Gohir.D06G171001.1	0.496485	1.32729	1.34714	-0.651965	-1.37539	-1.14356		Gohir.D12G167900.1	-0.413148	-1.71595	-1.45898	0.406561	1.95534	1.22617
Gohir.A01G083900.1	0.458697	1.57441	1.63664	-1.28755	-1.33799	-1.04421		Gohir.D13G136000.1	-0.723163	-2.3394	-2.84741	1.79403	2.07955	2.0364
Gohir.A10G169550.1	1.25613	-0.241197	0.674439	-0.563125	-0.563125	-0.563125		Gohir.D09G074100.1	-0.792358	-1.49927	-0.443878	0.348641	0.920435	1.46643
Gohir.D06G097200.2	1.01321	0.860006	0.880675	-0.788516	-0.549527	-1.41585		Gohir.A02G125200.1	-0.501839	-0.494708	-0.3775	0.49697	0.448471	0.428606
Gohir.A11G190200.1	1.19183	1.13541	0.564703	-0.889108	-0.857144	-1.14569		Gohir.A06G068800.1	-1.01028	-0.934546	-0.656687	0.937791	0.983528	0.680199
Gohir.D11G332800.3	0.179549	1.29805	2.0883	-1.19242	-1.34254	-1.03094		Gohir.A13G196200.2	-0.723808	-0.647827	-0.944138	-0.177755	1.11487	1.37866
Gohir.D12G146000.2	1.30158	0.857999	0.780051	-1.05407	-0.801498	-1.08405		Gohir.D08G087700.1	-0.793519	-1.03597	-1.03597	0.12753	0.285382	2.45255
Gohir.A07G080000.1	0.103644	0.654982	0.967157	-0.416657	-0.432307	-0.876819		Gohir.D04G102400.1	-0.458744	-0.946309	-0.976572	0.791503	0.837795	0.752327
Gohir.A01G201200.1	1.50493	1.42796	1.06675	-0.933249	-1.53182	-1.53457		Gohir.D11G081800.1	-0.500775	-0.980005	-0.980005	0.921489	0.503875	1.03542
Gohir.D09G167100.1	1.74083	0.942811	0.89048	-1.31524	-0.836963	-1.42193		Gohir.A02G016400.1	-0.599055	-1.06335	-0.360754	0.952519	0.522886	0.547757
Gohir.D12G023500.1	1.31634	0.841864	0.173417	-0.584263	-0.985514	-0.761842		Gohir.D03G020200.1	-0.392352	-0.458479	-0.634802	0.291197	0.628232	0.566204
Gohir.A12G030000.1	0.508561	1.15929	0.969015	-1.01166	-0.977258	-0.647951		Gohir.A11G237000.2	-0.484372	-0.881837	-0.651978	0.892371	0.62128	0.504536
Gohir.D11G102900.1	1.4467	1.32655	1.25205	-1.00957	-1.34805	-1.66767		Gohir.D03G083800.1	-0.686073	-0.68747	-1.42133	0.126462	1.2579	1.41051
Gohir.D10G153200.1	0.225813	1.05942	1.18286	-0.788523	-0.75623	-0.92334		Gohir.A01G186900.1	-0.340198	-0.994413	-0.810742	0.735283	0.647784	0.762287
Gohir.D11G052400.1	1.6056	0.456794	1.16566	-1.42443	-1.10946	-0.694163		Gohir.D09G073800.1	-0.386232	-0.501601	-0.441424	0.481541	0.536983	0.310733
Gohir.D02G165400.1	0.514108	1.8553	1.54008	-1.43403	-0.883565	-1.5919		Gohir.A05G069200.1	-1.20438	-1.31116	-1.00378	1.11925	1.20517	1.19489
Gohir.A05G052900.1	0.893289	0.89938	1.1017	-1.06576	-0.899674	-0.928939		Gohir.D12G026900.1	-0.691633	-1.47504	-1.4737	1.3254	1.08854	1.22643
Gohir.A12G060650.1	0.721868	0.803284	0.773086	-0.738152	-0.71338	-0.846705		Gohir.D02G023600.1	-0.948344	-2.22371	-1.53977	1.22718	1.84511	1.63953
Gohir.D08G107000.1	0.610502	1.16008	0.996361	-0.947776	-0.949693	-0.869471		Gohir.A09G002000.2	-1.15205	-1.54339	-1.32744	1.15311	1.26993	1.59983
Gohir.D05G140350.1	0.342797	1.12526	0.988319	-0.654685	-0.970144	-0.831546		Gohir.D07G053800.1	-0.57201	-1.27067	-1.16365	0.493163	1.14833	1.36485
Gohir.D07G149900.1	0.00679135	1.07933	1.71989	-0.89318	-1.03491	-0.877921		Gohir.D05G122000.2	-0.917203	-2.0487	-2.22336	1.13949	1.9781	2.07166
Gohir.A04G074500.1	2.50911	2.26583	2.07604	-2.06785	-2.12015	-2.66297		Gohir.D05G070700.1	-0.515089	-2.05901	-1.41227	1.49698	1.31577	1.17362
Gohir.A11G081900.2	1.07538	0.829454	0.359603	-0.775821	-0.753138	-0.735479		Gohir.A02G145800.1	-0.496824	-0.585614	-0.404963	0.488121	0.274425	0.724855
Gohir.D03G014500.1	0.915615	0.62158	0.727369	-0.584104	-0.711288	-0.969172		Gohir.D04G046100.1	-0.305952	-1.96937	-0.95413	0.78079	1.29047	1.15819
Gohir.A08G072500.1	1.09234	1.46705	0.999289	-0.88847	-1.30963	-1.36058		Gohir.D13G062300.1	-0.68043	-1.19969	-1.13199	0.287661	1.23496	1.4895
Gohir.A05G160200.2	0.982694	0.761566	0.835166	-1.01921	-0.797221	-0.762999		Gohir.A07G000600.2	-0.69492	-1.73853	-0.929008	1.27798	1.06835	1.01613
Gohir.D13G161400.1	0.557224	0.805631	0.353502	-0.373004	-0.580088	-0.763265		Gohir.D11G137100.1	-0.748902	-0.99253	-1.11574	0.653224	1.12435	1.0796
Gohir.D02G085700.1	0.976887	2.14329	1.71277	-1.08024	-1.94692	-1.80578		Gohir.A11G274100.1	-0.630475	-1.03759	-1.01999	1.12798	0.701525	0.858557
Gohir.A11G103200.1	0.497815	0.780277	0.676304	-0.6804	-0.486438	-0.787558		Gohir.D13G236400.1	-0.798619	-1.01513	-0.946638	1.01613	0.881944	0.862315
Gohir.A10G237600.1	0.659339	1.42517	1.27574	-1.23418	-1.11061	-1.01546		Gohir.A03G025700.1	-0.692978	-1.38463	-1.26098	0.948318	1.26875	1.12152
Gohir.A05G211600.2	1.76305	0.397379	0.478644	-0.879363	-0.664981	-1.09473		Gohir.D11G188100.1	-1.52802	-0.962061	-1.69903	-0.25962	2.27449	2.17423
Gohir.A09G163300.2	0.779107	0.621179	0.958059	-0.836696	-0.714305	-0.807344		Gohir.D13G134800.1	-0.877459	-1.07358	-1.36548	0.853003	1.16381	1.2997
Gohir.D05G136900.1	1.03572	1.36646	1.27141	-1.06523	-1.306	-1.30235		Gohir.A11G090900.1	-0.471746	-0.959963	-0.71874	0.656769	0.673071	0.820609
Gohir.D02G237000.1	2.34571	0.408454	0.692335	-1.14883	-1.14883	-1.14883		Gohir.A03G217700.1	-0.841827	-1.30231	-1.10948	1.13652	1.03398	1.08312
Gohir.A11G297401.1	0.767939	0.882291	1.10509	-1.11301	-0.660878	-0.981434		Gohir.A11G238300.1	-0.578787	-1.09874	-0.759545	0.437483	1.07727	0.92232
Gohir.A08G082200.1	1.47057	1.25827	0.868847	-0.979577	-1.21824	-1.39987		Gohir.D06G080800.1	-0.974215	-0.911216	-0.623111	0.553057	1.25356	0.701921
Gohir.A09G093300.1	1.25619	0.818884	0.853748	-1.11424	-1.00744	-0.807139		Gohir.D05G254000.1	-0.516813	-2.28835	-2.5626	1.80715	1.76702	1.79359
Gohir.A07G013200.1	0.513761	0.869528	1.1523	-0.513742	-1.16082	-0.861028		Gohir.A10G017500.1	-0.650488	-0.544415	-0.682284	-0.32568	1.18853	1.01434
Gohir.A07G080600.1	0.426941	1.59139	1.05341	-0.406623	-1.33466	-1.33046		Gohir.A11G067000.1	-0.570747	-1.29622	-1.47903	1.30752	1.16046	0.878017
Gohir.D05G053600.1	1.74064	1.04357	1.1023	-1.31913	-1.15854	-1.40884		Gohir.D12G030700.1	-0.74746	-1.32761	-1.2354	1.22034	1.14929	0.940829
Gohir.D06G070400.1	0.907386	1.28153	1.01113	-0.977874	-1.25073	-0.971448		Gohir.A05G079700.3	-0.750097	-1.27962	-1.64853	1.25427	1.35772	1.06626
Gohir.D03G036100.1	0.824931	0.492667	0.68847	-0.732076	-0.600571	-0.673421		Gohir.A02G054701.1	-0.817598	-1.05735	-0.986912	0.84691	1.04347	0.971477
Gohir.A08G189800.1	1.67383	1.44133	1.06625	-0.854827	-1.56911	-1.75748		Gohir.A06G072600.1	-1.06852	-0.803157	-1.14142	0.434529	1.00724	1.57132
Gohir.A05G189600.1	0.495474	1.16244	0.782667	-0.756268	-0.773006	-0.911305		Gohir.D06G134400.1	-0.500694	-1.27839	-1.30713	1.19809	1.02508	0.863037
Gohir.A08G019000.1	0.781989	0.543692	0.774082	-0.607093	-0.822251	-0.670419		Gohir.A08G165850.1	-1.02575	-1.67543	-1.16591	1.90614	1.12957	0.831385
Gohir.A06G082000.1	0.747626	1.06381	1.21853	-0.699178	-1.17543	-1.15536		Gohir.A04G010100.1	-1.10316	-1.10316	-1.10316	1.93686	2.47578	-1.10316
Gohir.D09G048100.1	2.45882	0.507276	0.686748	-0.964411	-1.55753	-1.13091		Gohir.D12G110600.1	-0.596751	-1.24984	-1.19731	1.16872	0.898363	0.976826
Gohir.D04G174900.1	2.46808	1.55738	1.69404	-1.98555	-2.10555	-1.6284		Gohir.D12G180200.1	-0.686077	-1.19248	-1.37997	1.02266	1.02316	1.2127
Gohir.D11G315100.1	2.14277	1.34217	0.0230087	-0.772711	-1.44562	-1.2896		Gohir.A03G054400.1	-0.908831	-1.35048	-1.31943	0.257237	1.65057	1.67094
Gohir.A05G075100.1	1.088	0.574071	1.27728	-1.77061	-0.603724	-0.565018		Gohir.D07G211500.1	-0.597592	-0.860938	-0.734784	0.0176896	0.982428	1.1932
Gohir.A13G179900.1	2.28895	1.42646	0.106038	-1.27528	-1.23105	-1.31512		Gohir.A12G103400.1	-1.29797	-1.02012	-1.07935	0.935098	1.17874	1.2836
Gohir.D02G079800.1	0.5136	1.4778	1.1779	-0.901833	-1.1565	-1.11097		Gohir.D13G153400.1	-0.413389	-0.490926	-0.665977	0.440537	0.615159	0.514595
Gohir.D07G072600.1	0.182144	1.8263	1.66267	-1.26656	-0.912924	-1.49163		Gohir.D05G089800.1	-0.758105	-1.63789	-0.920877	0.896641	1.17239	1.24784
Gohir.D08G228300.1	0.908632	1.45853	0.818323	-0.704634	-1.35131	-1.12954		Gohir.A03G180500.2	-0.497299	-0.497299	-0.497299	0.49184	0.783658	0.216397
Gohir.D11G084500.1	0.321585	0.807896	2.37795	-1.03412	-1.23535	-1.23796		Gohir.D12G047766.1	-0.415676	-0.80759	-0.789594	0.612118	0.791787	0.608955
Gohir.A01G077400.1	0.115387	1.39547	1.60555	-0.864725	-0.924793	-1.32689		Gohir.D10G232600.1	-0.412168	-1.58382	-1.0246	0.489313	1.18506	1.34622
Gohir.D01G036700.1	0.960448	0.939836	0.868808	-0.896392	-0.892974	-0.979726		Gohir.A13G151000.1	-0.909949	-1.52184	-1.42579	0.728946	1.55847	1.57017
Gohir.A06G069200.1	0.844955	0.628302	0.896351	-0.432996	-1.15798	-0.778634		Gohir.D01G046100.1	-0.495295	-1.89529	-2.0815	1.12364	1.70497	1.64347
Gohir.A07G204000.1	0.671689	1.20559	0.945373	-0.86984	-1.02893	-0.92388		Gohir.A05G329800.1	-0.715982	-1.59207	-0.674731	1.15546	0.984979	0.842346
Gohir.A03G158200.2	2.08619	0.995333	0.93928	-1.16868	-1.6422	-1.20993		Gohir.A06G191100.1	-0.585767	-0.719033	-0.658279	0.463334	0.756177	0.743568
Gohir.A03G146100.1	1.41265	0.265439	0.687804	-0.822479	-0.513209	-1.03021		Gohir.D05G052300.1	-0.836245	-0.859985	-0.830904	0.379097	1.17601	0.972027
Gohir.D13G132601.1	0.287274	1.13129	0.842773	-0.618779	-0.724268	-0.918293		Gohir.D13G029100.9	-0.353285	-0.573615	-0.573615	0.632403	0.590528	0.277584
Gohir.A11G100600.1	0.271571	0.761675	1.25207	-1.00344	-0.867244	-0.414631		Gohir.D08G143200.1	-1.19763	-1.19763	-1.03284	0.541789	1.14151	1.74479
Gohir.D02G145000.2	0.342309	0.740835	0.710417	-0.542688	-0.650186	-0.600687		Gohir.D10G174000.1	-1.35525	-0.902123	-1.09341	1.05564	1.13943	1.15572
Gohir.A08G115600.1	0.497002	1.50231	0.936298	-0.581237	-1.08966	-1.26471		Gohir.A07G221300.1	-0.766017	-0.650699	-0.996713	0.634458	1.01237	0.766606
Gohir.A05G052500.1	0.682001	0.966137	0.877181	-0.794675	-0.838068	-0.892576		Gohir.D05G052900.1	-0.537371	-1.16593	-0.852279	1.04132	0.579716	0.934538
Gohir.D08G021500.1	0.645618	1.57839	1.6406	-1.46278	-1.303	-1.09881		Gohir.D13G238066.1	-0.56992	-0.73213	-0.483595	0.625141	0.277217	0.883286
Gohir.A12G069200.1	0.661269	0.668523	0.438703	-0.539638	-0.624491	-0.604366		Gohir.D03G129500.1	-0.860115	-2.02062	-0.686798	0.0316344	1.69186	1.84404
Gohir.A11G152700.1	1.77762	0.596677	0.138092	-0.76701	-0.872688	-0.872688		Gohir.D04G120300.1	-1.24762	-0.715295	-1.14029	0.605712	1.22669	1.2708
Gohir.D12G254300.1	0.681244	1.46912	1.6273	-0.533924	-1.61246	-1.63128		Gohir.D11G296792.1	-0.404422	-0.602287	-0.451728	0.486533	0.256887	0.715017
Gohir.D05G111200.1	0.77058	1.47978	0.959075	-0.91571	-1.25115	-1.04258		Gohir.D08G035600.1	-0.658091	-1.78029	-1.13898	1.25228	1.00171	1.32337
Gohir.A05G183725.1	1.31406	1.74787	1.6752	-1.72931	-1.44569	-1.56213		Gohir.A07G004600.1	-0.315429	-0.980591	-1.16181	0.345402	0.78941	1.32301
Gohir.D03G093700.1	0.56162	0.962176	1.36163	-1.04517	-0.635148	-1.20511		Gohir.D05G264600.1	-1.20249	-1.02218	-1.18018	-0.0739897	1.68525	1.79359
Gohir.D02G216200.1	2.53199	1.28907	1.34123	-1.45503	-1.94019	-1.76707		Gohir.D08G162600.1	-0.590544	-1.01728	-1.22696	1.27136	0.7754	0.788026
Gohir.A05G401800.1	4.33169	0.567487	1.1148	-2.24481	-1.89868	-1.87048		Gohir.A03G208800.1	-0.322394	-0.73585	-0.940287	0.544471	0.537013	0.917048
Gohir.D01G060400.1	1.14954	2.25181	1.29769	-1.85484	-1.47418	-1.37002		Gohir.A13G217000.1	-0.83704	-0.821692	-0.777344	0.430808	1.03539	0.969874
Gohir.A06G019400.1	1.27611	0.711283	0.496567	-0.707887	-0.888035	-0.888035		Gohir.A05G174000.1	-0.617919	-0.601703	-0.747292	0.495491	0.948702	0.522721
Gohir.A09G054300.1	0.980604	2.04317	1.44045	-1.49041	-1.41123	-1.56258		Gohir.A13G157400.1	-1.10147	-0.727253	-0.495609	0.31604	1.09989	0.908401
Gohir.D01G201500.1	2.14843	0.563055	-0.00991795	-0.98421	-0.925947	-0.791413		Gohir.D13G121700.1	-0.487238	-2.52698	-3.71669	2.53499	2.37953	1.81639
Gohir.A03G188300.1	1.1003	1.26659	0.238023	-1.02958	-0.488912	-1.08642		Gohir.D01G017900.1	-1.2799	-1.85842	-1.33411	0.591801	1.93787	1.94276
Gohir.D09G006700.1	1.92766	1.65009	1.37472	-1.53418	-1.40757	-2.01071		Gohir.D07G020700.1	-0.558835	-1.85843	-2.71827	1.28996	2.04242	1.80316
Gohir.A02G060600.1	0.332321	1.85558	1.61229	-1.67685	-1.12346	-0.99988		Gohir.D09G028300.1	-1.16307	-1.28061	-2.02304	0.433236	2.27371	1.75978
Gohir.D09G020050.1	0.578634	1.84211	1.46551	-0.900331	-1.2619	-1.72402		Gohir.D05G195600.1	-0.210831	-1.53954	-1.02925	1.26517	0.881664	0.632787
Gohir.D03G001300.1	1.33537	1.0264	0.86674	-1.06673	-1.08563	-1.07615		Gohir.D10G142100.1	-0.582103	-1.27245	-1.13278	1.15344	0.978577	0.855318
Gohir.D11G239200.1	0.489801	1.23693	1.69223	-1.3773	-0.884682	-1.15697		Gohir.D02G023500.1	-0.575681	-2.07449	-1.36443	1.28812	1.55691	1.16957
Gohir.A10G008100.1	0.51888	1.3335	1.4879	-0.994211	-1.06127	-1.2848		Gohir.D12G219832.1	-1.02679	-0.83248	-1.72545	0.454694	1.41254	1.71749
Gohir.D08G077700.1	-0.30314	1.46668	1.61748	-0.927007	-0.927007	-0.927007		Gohir.D11G080800.1	-0.421224	-0.652657	-0.545639	0.22155	0.944278	0.453692
Gohir.A11G145300.1	-0.0823819	1.17698	1.50358	-0.816904	-0.77426	-1.00701		Gohir.D03G022151.1	-0.850544	-0.850544	-0.850544	0.145121	1.1805	1.22601
Gohir.D12G061000.1	0.344217	1.20049	1.33671	-1.35151	-0.753242	-0.776663		Gohir.A01G139500.2	-0.985212	-2.05132	-0.55034	1.68482	1.20538	0.696673
Gohir.A12G114800.1	1.00329	1.40728	1.86657	-1.63716	-1.32502	-1.31494		Gohir.A07G002500.1	-0.511506	-0.946378	-1.00757	0.684449	0.990892	0.790117
Gohir.D02G211400.2	0.0912293	0.785809	0.456031	-0.451963	-0.444343	-0.436763		Gohir.D01G179100.1	-0.463934	-0.804212	-0.310564	0.353479	0.464821	0.76041
Gohir.A05G098400.1	1.15205	1.24301	0.606066	-0.866808	-0.954426	-1.17989		Gohir.A09G093200.3	-0.723478	-1.05346	-1.05346	0.164388	1.12732	1.53869
Gohir.D06G012500.1	0.817004	0.536569	0.6621	-0.708791	-0.769332	-0.537549		Gohir.D11G168000.1	-1.24293	-0.660648	-1.16091	1.27579	0.800937	0.987764
Gohir.A11G327800.1	0.277211	0.704985	0.541645	-0.57415	-0.30928	-0.640412		Gohir.A05G258200.1	-1.33167	-1.40382	-1.13644	0.86875	1.40618	1.597
Gohir.A05G140500.2	0.639618	1.29455	0.945072	-0.683644	-0.79992	-1.39568		Gohir.D11G256600.1	-0.413578	-0.96957	-1.17576	0.634754	1.02184	0.902315
Gohir.A05G002000.2	1.4778	0.552233	0.626513	-0.903519	-0.726641	-1.02639		Gohir.D05G001700.1	-0.840647	-2.09652	-2.43255	1.7011	1.75977	1.90886
Gohir.D04G080300.1	-0.254701	0.71885	0.927376	-0.463842	-0.463842	-0.463842		Gohir.D05G054701.1	-0.639358	-0.734748	-0.717804	0.383255	1.19157	0.517083
Gohir.A10G238400.1	-0.20928	1.45841	1.42922	-0.675598	-1.09755	-0.905199		Gohir.A09G018150.1	-0.607896	-1.21933	-1.02293	0.835952	0.974058	1.04015
Gohir.D05G063700.1	0.915994	0.719452	1.10018	-0.997648	-0.971652	-0.766322		Gohir.D08G039800.3	-0.467277	-1.96686	-0.644654	1.27391	0.893502	0.911389
Gohir.A09G112100.1	1.36598	0.900882	0.362077	-0.634867	-0.840848	-1.15322		Gohir.D13G121400.1	-0.487238	-2.52698	-3.71669	2.53499	2.37953	1.81639
Gohir.D11G270232.1	1.07216	0.564511	0.786727	-0.614389	-0.794713	-1.01429		Gohir.D07G150900.1	-0.573249	-0.686961	-0.765097	0.506514	0.704034	0.814758
Gohir.A05G197100.1	0.647178	1.15983	1.05798	-0.623181	-1.13617	-1.10564		Gohir.A06G138200.1	-0.292415	-0.786537	-0.494378	0.390596	0.525001	0.657733
Gohir.D09G132001.1	1.25389	0.450023	0.554019	-0.793646	-0.670642	-0.793646		Gohir.A10G014600.1	-0.834717	-1.84917	-0.454783	1.56178	0.82987	0.747022
Gohir.A05G131900.1	0.523786	1.24271	1.11875	-0.89654	-0.994483	-0.994218		Gohir.D05G010000.3	-1.58159	-1.54071	-1.51021	0.96235	1.65958	2.01057
Gohir.A07G189900.1	1.64498	1.48632	1.53026	-1.53866	-1.20241	-1.92049		Gohir.D11G093600.1	-1.24432	-2.47898	-2.1399	1.36506	2.03787	2.46028
Gohir.D01G171300.1	0.781573	0.267471	0.5086	-0.516888	-0.472904	-0.567852		Gohir.D02G019001.1	-0.642198	-1.44263	-0.381343	0.924312	0.614788	0.927067
Gohir.D01G061600.1	0.730528	1.02673	0.926841	-0.946346	-1.07745	-0.660302		Gohir.A02G152100.2	-0.421142	-0.671264	-0.473097	0.338188	0.632597	0.594718
Gohir.D01G097000.1	0.21143	0.634197	0.836372	-0.481182	-0.552278	-0.64854		Gohir.D09G139100.1	-0.454744	-1.14981	-1.14847	0.555571	0.944262	1.25319
Gohir.A09G122700.1	1.75698	0.441166	0.25809	-0.776935	-0.786969	-0.892336		Gohir.D02G170900.1	-0.59218	-1.16724	-0.520627	0.110139	1.17458	0.995327
Gohir.D09G224100.1	1.53492	0.267456	0.64268	-0.663083	-0.997371	-0.784601		Gohir.A01G166900.1	-0.569976	-0.988505	-1.29228	0.321937	1.58465	0.944169
Gohir.D01G052100.1	0.42443	0.648272	0.0961443	-0.376776	-0.419079	-0.372991		Gohir.A08G083400.1	-0.573492	-0.616369	-0.462735	0.406836	0.365015	0.880745
Gohir.A05G225300.1	0.847439	1.52382	1.38439	-1.08152	-1.3508	-1.32333		Gohir.A11G122000.1	-0.479634	-0.672279	-0.733018	0.575576	0.616913	0.692441
Gohir.A05G141000.1	0.477852	1.48862	1.62364	-1.12083	-1.28746	-1.18183		Gohir.D05G204100.1	-1.43471	-1.36121	-0.532206	1.20933	1.01627	1.10253
Gohir.D07G117900.1	0.176605	0.832578	0.377977	-0.369725	-0.511744	-0.50569		Gohir.A09G196400.1	-0.908544	-1.24061	-1.14021	1.39262	0.90577	0.990973
Gohir.A04G131600.2	0.989021	0.623777	0.615597	-1.04269	-0.559906	-0.625802		Gohir.D03G014800.1	-0.560773	-0.487535	-0.410414	0.382972	0.650678	0.425072
Gohir.D05G219200.1	1.01276	1.07792	0.824637	-1.26545	-0.747775	-0.902088		Gohir.A10G051100.1	-0.730704	-1.19802	-0.876375	0.312773	1.33629	1.15604
Gohir.D07G116800.2	0.509658	0.432075	0.543869	-0.556018	-0.474068	-0.455516		Gohir.D06G180150.1	-0.781742	-0.781742	-0.781742	0.319908	0.791633	1.23368
Gohir.A01G226300.1	1.88508	0.986066	0.672251	-1.04634	-1.38537	-1.11169		Gohir.D10G004500.1	-0.386539	-1.12082	-1.46534	1.08998	0.821823	1.06089
Gohir.A09G168200.1	0.725555	1.14872	1.11899	-0.977888	-1.10246	-0.912919		Gohir.A01G019200.1	-0.579871	-0.878087	-1.06839	-0.0865336	1.02111	1.59177
Gohir.D12G218600.2	0.354845	1.03077	0.0994605	-0.431668	-0.661111	-0.392294		Gohir.D02G145300.1	-0.62396	-1.36429	-0.996023	0.77924	1.19643	1.0086
Gohir.A04G003100.1	0.616226	0.749999	0.695943	-0.633274	-0.865852	-0.563043		Gohir.A03G072101.1	-1.31592	-1.69665	-1.15761	1.42404	1.4591	1.28703
Gohir.A03G120900.1	0.927004	1.32105	0.817719	-0.857777	-1.21387	-0.994128		Gohir.D02G169800.2	-1.27362	-1.74365	-1.22189	0.822924	1.72879	1.68744
Gohir.A05G140900.1	0.974326	1.25627	1.66888	-1.43192	-1.43251	-1.03505		Gohir.A09G006600.1	-0.561657	-0.93426	-1.37629	0.814512	1.1742	0.883495
Gohir.A05G189500.1	1.2546	0.54927	0.948059	-0.795335	-0.988747	-0.967851		Gohir.A12G175160.1	-0.865764	-1.04851	-1.13675	0.794358	1.26766	0.989008
Gohir.A13G178700.1	1.04699	0.216774	0.376409	-0.583845	-0.513705	-0.542622		Gohir.A11G267800.2	-0.638374	-1.37748	-1.62936	0.977163	1.23041	1.43764
Gohir.D11G216600.3	-0.0849369	1.4406	1.25835	-1.1844	-0.74838	-0.68124		Gohir.D05G277900.1	-1.08476	-1.14673	-1.2457	1.04749	1.15558	1.27411
Gohir.A12G049700.1	0.722075	0.315951	0.399157	-0.300526	-0.626928	-0.509729		Gohir.D04G043400.1	-0.733959	-0.962121	-1.42811	1.202	0.918725	1.00347
Gohir.D11G153500.1	0.701867	1.20537	0.879875	-0.469924	-1.15419	-1.16301		Gohir.A03G123900.1	-0.796228	-0.564796	-0.660037	-0.274173	0.805468	1.48977
Gohir.A05G198000.1	1.25488	0.351766	0.496156	-0.488314	-0.90851	-0.705977		Gohir.D09G231700.2	-0.890313	-1.43867	-1.23954	-0.0183903	1.84002	1.7469
Gohir.A01G203500.1	3.03647	0.541363	0.144063	-1.05713	-1.32499	-1.33978		Gohir.A11G027500.1	-0.564546	-1.64962	-1.90171	0.879381	1.68379	1.5527
Gohir.D05G171700.1	0.708458	1.02155	0.651798	-0.898707	-0.576585	-0.906511		Gohir.A05G300000.1	-0.844037	-0.941844	-0.579364	0.954537	0.774081	0.636627
Gohir.A03G215200.1	0.602333	0.580446	0.2675	-0.320808	-0.655096	-0.474375		Gohir.D11G255800.1	-0.564161	-2.19195	-2.51668	0.893976	2.3369	2.04191
Gohir.A11G299500.1	0.58232	1.09988	1.07647	-0.912293	-0.799582	-1.0468		Gohir.D11G085800.16	-0.119796	-1.10914	-1.06212	0.662115	0.649876	0.979056
Gohir.D02G023100.1	0.479491	0.6357	0.302308	-0.607314	-0.480127	-0.330059		Gohir.A13G169000.1	-0.636173	-0.66225	-0.632806	0.754646	0.418941	0.757642
Gohir.D08G122400.1	1.34838	0.45655	0.664652	-0.84962	-0.809006	-0.810961		Gohir.D05G212400.1	-0.204743	-1.68876	-1.10037	0.525879	1.32011	1.14789
Gohir.D05G372900.1	0.244889	0.977874	1.07393	-0.590902	-0.832807	-0.872983		Gohir.D12G247500.1	-0.423979	-1.24293	-1.28193	1.03394	1.19104	0.723869
Gohir.D13G145200.1	2.01669	1.08776	0.173927	-0.981221	-1.14858	-1.14858		Gohir.A10G032900.1	-0.538441	-2.13634	-1.67359	1.44406	1.52556	1.37874
Gohir.A01G154500.1	1.26285	0.731824	0.698863	-0.711225	-0.886471	-1.09584		Gohir.D09G235800.1	-0.583202	-1.32062	-1.90576	0.99589	1.41421	1.39949
Gohir.A05G110600.1	0.0135325	1.09083	0.523251	-0.547033	-0.573668	-0.506911		Gohir.A13G145600.2	-0.572356	-1.86691	-1.81819	1.27023	1.48756	1.49967
Gohir.D07G239000.1	0.955925	1.65524	1.01624	-0.57261	-1.70091	-1.3539		Gohir.A10G096400.1	-0.379159	-0.945243	-1.24152	1.01424	0.864361	0.687316
Gohir.A02G035300.1	1.79134	0.83813	0.738804	-1.53523	-0.836566	-0.996479		Gohir.A13G065500.1	-0.63403	-0.881603	-1.03211	0.690549	1.02063	0.83656
Gohir.D02G184300.1	0.781888	1.53904	1.25776	-0.978943	-1.0623	-1.53744		Gohir.A07G203700.1	-0.642375	-1.17692	-1.40511	1.06954	1.00986	1.145
Gohir.D10G149800.1	0.392749	1.22137	1.37231	-0.917796	-0.93646	-1.13217		Gohir.A13G036700.1	-0.763967	-1.80714	-1.44573	1.43814	1.29442	1.28428
Gohir.A10G120700.1	0.22097	1.86858	1.2147	-1.16795	-0.601217	-1.53508		Gohir.D06G140000.1	-0.735746	-0.763001	-0.732228	-0.250822	1.5668	0.914996
Gohir.D10G247500.1	0.129939	1.18738	1.13585	-1.00165	-0.839441	-0.612084		Gohir.D13G130700.1	-0.711246	-0.779868	-0.649302	0.524778	0.846785	0.768853
Gohir.A13G169600.1	1.32834	1.07811	0.602585	-1.54717	-0.893844	-0.568029		Gohir.D06G029400.1	-0.594276	-0.671519	-0.549841	0.31762	0.79158	0.706437
Gohir.A11G273500.1	1.13879	0.588915	1.17952	-1.06598	-0.99559	-0.845649		Gohir.D04G106200.1	-0.6416	-0.712671	-0.784687	-0.056225	1.35313	0.842056
Gohir.D08G064300.2	0.107698	1.05028	0.981693	-0.830076	-0.470505	-0.83909		Gohir.D05G077700.1	-0.906474	-2.70526	-1.77938	1.64662	1.79306	1.95144
Gohir.D11G258700.1	2.20802	1.51474	0.707738	-1.69704	-1.5604	-1.17306		Gohir.D05G082600.1	-0.887816	-1.39257	-2.36121	1.35157	1.69117	1.59885
Gohir.D09G189400.1	0.313325	0.785104	0.660733	-0.360556	-0.574429	-0.824178		Gohir.A08G178100.1	-0.483363	-1.17012	-0.89863	1.40485	0.634069	0.513196
Gohir.D04G028400.1	0.145591	0.768628	0.61874	-0.678158	-0.555154	-0.299646		Gohir.D10G142800.1	-0.609857	-0.950134	-0.857927	0.726584	1.01667	0.674668
Gohir.D06G217500.1	0.682154	1.18374	1.26202	-0.844224	-1.21569	-1.06801		Gohir.D09G110300.1	-0.248832	-0.774005	-0.97364	0.827456	0.868366	0.300654
Gohir.D12G122700.1	0.0548778	1.40736	0.998489	-0.722087	-0.810881	-0.927754		Gohir.D07G237300.1	-0.792276	-0.842631	-0.702502	0.902197	0.581249	0.853963
Gohir.A08G024000.1	1.1508	0.578408	0.752304	-0.793664	-1.11939	-0.568454		Gohir.A05G081400.1	-0.845482	-0.755792	-0.648925	-0.0633272	1.13803	1.1755
Gohir.A09G222000.1	1.37999	0.63548	0.165497	-0.708512	-0.803813	-0.668643		Gohir.A12G224700.1	-0.714647	-0.666344	-0.518481	0.700277	0.522999	0.676197
Gohir.A10G002800.1	0.909558	0.809134	0.387419	-0.660978	-0.692071	-0.753062		Gohir.A09G160900.1	-1.49176	-1.4101	-1.1956	1.21625	1.55128	1.32993
Gohir.D04G080500.1	0.686289	1.18396	0.665126	-0.865389	-0.964925	-0.705058		Gohir.D02G058200.1	-0.522017	-0.45193	-0.670973	0.342432	0.562087	0.740401
Gohir.A09G006700.1	0.108065	0.760278	0.534243	-0.391146	-0.513136	-0.498304		Gohir.A08G048000.1	-0.408184	-1.18191	-1.29276	0.784502	1.21154	0.886804
Gohir.D02G049500.1	-0.0998494	1.14835	0.525852	-0.477528	-0.527091	-0.569735		Gohir.D06G083700.1	-0.543275	-0.838123	-0.721172	0.812834	0.625037	0.6647
Gohir.A06G148650.1	0.926333	1.23945	0.935397	-0.763087	-1.00564	-1.33245		Gohir.A07G034300.1	-0.541574	-0.57471	-0.198056	0.336108	0.552272	0.42596
Gohir.A05G012700.1	0.589769	1.31501	1.13689	-0.822278	-1.08386	-1.13553		Gohir.D13G151700.1	-1.1802	-0.929124	-1.06784	0.692148	1.19861	1.2864
Gohir.A07G024600.1	0.385496	0.917024	0.712822	-0.671781	-0.671781	-0.671781		Gohir.A05G364700.1	-0.267236	-1.18102	-1.42203	0.689885	1.1534	1.027
Gohir.A01G166200.1	1.5153	0.851702	0.830733	-0.596158	-1.45475	-1.14683		Gohir.A05G182100.1	-0.733713	-1.23652	-1.50475	0.945457	1.27813	1.25139
Gohir.A06G166400.2	-0.0567676	1.45491	1.75592	-0.873359	-1.26829	-1.01241		Gohir.A07G017900.1	-0.347976	-0.670615	-0.56548	0.461273	0.407262	0.715536
Gohir.A05G142500.1	1.38871	1.49847	1.62322	-1.73985	-1.34117	-1.42938		Gohir.A09G247200.1	-0.657553	-2.2349	-1.99811	1.33109	1.91075	1.64873
Gohir.D05G283300.1	-0.298685	1.61373	1.43432	-0.836409	-1.01753	-0.895421		Gohir.A06G084600.1	-0.563017	-1.26898	-1.46525	0.738366	1.22993	1.32894
Gohir.A05G078000.1	1.18884	1.56546	1.30874	-1.28442	-1.40124	-1.37737		Gohir.D05G184000.1	-1.31037	-1.4194	-0.396165	0.797599	1.198	1.13034
Gohir.D07G129800.1	0.883565	1.51687	1.15921	-0.989133	-1.33768	-1.23283		Gohir.A05G128366.1	-0.539848	-0.921994	-0.964665	1.03296	0.623002	0.77054
Gohir.A10G014300.1	0.313216	1.047	1.24949	-0.931166	-0.808775	-0.869765		Gohir.A05G416701.1	-0.434888	-1.00674	-0.977654	0.939225	1.07829	0.401759
Gohir.D11G019401.1	1.68984	0.531723	0.608524	-0.943361	-0.943361	-0.943361		Gohir.A11G054600.1	-0.523266	-1.3633	-1.35852	1.11577	1.10897	1.02035
Gohir.D05G131100.1	0.489882	0.842681	0.859331	-0.555345	-0.683904	-0.952645		Gohir.A13G000300.1	-0.42666	-1.08716	-0.829123	0.531948	0.782557	1.02844
Gohir.A04G057200.1	1.34691	0.253623	0.405056	-0.778669	-0.385075	-0.841845		Gohir.D05G303000.1	-0.712202	-1.37997	-0.892593	0.904597	1.10455	0.975627
Gohir.D07G103000.2	0.946961	0.848613	0.678273	-0.665917	-0.778951	-1.02898		Gohir.D06G170000.2	-0.546152	-0.655045	-0.625345	0.240878	0.751165	0.834498
Gohir.D07G009200.1	0.210285	1.88336	1.99005	-1.40301	-1.25179	-1.42889		Gohir.A07G104400.1	-0.724888	-0.724888	-0.724888	1.686	-0.211903	0.700571
Gohir.D06G028500.1	1.48231	0.931957	0.994893	-1.02936	-1.04961	-1.33019		Gohir.D11G155100.1	-0.499445	-0.534979	-0.517715	0.510806	0.528127	0.513207
Gohir.D11G273400.1	0.976275	0.43866	0.788516	-0.757947	-0.687557	-0.757947		Gohir.A03G161200.1	-1.57775	-1.35742	-0.891915	0.767462	1.7608	1.29883
Gohir.A09G031200.1	0.896328	0.991846	0.784479	-0.914503	-0.922646	-0.835504		Gohir.D01G023517.1	-0.681706	-0.537166	-0.778174	0.414121	0.396849	1.18608
Gohir.A05G150700.2	0.438289	1.1427	0.916115	-1.21956	-0.408416	-0.869125		Gohir.D05G338300.1	-0.545589	-2.01773	-2.24037	1.28056	1.79268	1.73045
Gohir.A10G141400.1	1.6258	0.250007	0.228446	-0.607462	-0.696851	-0.799945		Gohir.D05G080800.1	-0.327087	-0.957853	-0.868942	0.769499	0.655124	0.729259
Gohir.A08G169400.1	0.351226	0.922331	0.689476	-0.487845	-0.737594	-0.737594		Gohir.D05G137600.1	-0.801932	-2.15589	-1.60439	1.38676	1.63852	1.53694
Gohir.D13G213400.1	0.880781	0.449233	1.25114	-0.773314	-0.877814	-0.930022		Gohir.D11G046700.1	-0.371892	-0.794662	-0.777399	0.71867	0.79154	0.433743
Gohir.D05G004200.1	0.809828	1.43381	1.28973	-1.17342	-1.44271	-0.917226		Gohir.A05G309500.1	-0.791792	-1.32335	-1.72995	0.826519	1.48739	1.53119
Gohir.A05G208400.1	1.02921	1.29721	1.29094	-0.471656	-1.45917	-1.68653		Gohir.D05G047700.1	-0.347678	-0.873079	-0.615011	0.888615	0.472227	0.474926
Gohir.D04G154100.1	1.33831	1.70874	1.74615	-2.13497	-1.4004	-1.25784		Gohir.D09G154600.1	-0.655851	-0.841083	-0.841083	-0.0586744	1.39862	0.99807
Gohir.A01G163500.1	0.89912	1.02779	0.984015	-0.761198	-1.22618	-0.923552		Gohir.A05G069600.1	-1.15068	-0.813583	-0.617763	0.474913	1.04058	1.06654
Gohir.A05G064100.3	0.284043	1.303	1.46636	-1.1032	-0.88661	-1.0636		Gohir.A13G111900.1	-0.37129	-1.44621	-1.04325	0.831531	1.17882	0.850393
Gohir.A01G065400.1	0.199591	1.84286	1.85304	-1.62832	-1.00421	-1.26296		Gohir.D11G122500.2	-0.463622	-0.807485	-0.682292	0.707899	0.63554	0.609959
Gohir.D04G026300.1	0.995545	1.04768	0.479632	-1.01645	-0.800738	-0.705676		Gohir.A11G100400.1	-1.20115	-0.64232	-0.830071	0.562626	0.87986	1.23105
Gohir.D01G058600.1	1.54621	0.763349	0.227682	-1.16993	-0.606957	-0.760356		Gohir.A06G110800.1	-0.781245	-0.577104	-0.368735	0.16586	0.596156	0.965068
Gohir.A03G040900.1	0.664828	1.00058	0.827521	-1.10211	-0.76778	-0.623036		Gohir.A09G019000.1	-0.434896	-0.675299	-0.901631	0.720433	0.720059	0.571334
Gohir.D02G037300.1	0.227855	1.07644	1.06247	-0.855678	-0.662631	-0.848463		Gohir.D12G206900.3	-0.431028	-1.10583	-1.73257	0.984057	1.16612	1.11925
Gohir.A12G222500.1	0.173228	0.627245	0.502964	-0.469043	-0.54692	-0.287473		Gohir.D10G148500.1	-0.663802	-1.55856	-1.81846	1.57921	1.2808	1.18082
Gohir.A05G120600.1	0.684872	1.4294	1.32523	-1.54365	-0.98083	-0.915013		Gohir.D05G254700.1	-1.05023	-0.493398	-0.668134	0.360343	1.1454	0.706019
Gohir.A06G164300.1	0.946232	1.31657	1.18625	-0.93618	-1.3037	-1.20917		Gohir.A03G030500.1	-0.872632	-1.76715	-2.26133	1.18365	1.94401	1.77345
Gohir.A08G215900.1	1.39545	0.827079	0.724568	-0.598416	-1.31963	-1.02905		Gohir.A09G211300.1	-0.876881	-1.52776	-1.5854	1.58711	1.19215	1.21078
Gohir.A02G037001.1	0.761234	1.08892	0.695145	-0.487811	-1.11615	-0.94134		Gohir.A05G234900.1	-0.449351	-0.590547	-0.813937	0.385935	0.668294	0.799604
Gohir.A10G082966.1	2.06547	1.58191	0.843493	-1.28039	-1.59732	-1.61316		Gohir.A09G127200.1	-0.511592	-0.572993	-0.915983	1.02308	0.37268	0.604809
Gohir.D06G012100.1	0.225425	1.37589	1.40487	-1.05376	-0.842747	-1.10968		Gohir.A03G172500.2	-0.465349	-2.56149	-2.53368	1.89068	1.71174	1.95811
Gohir.A02G041802.1	0.397147	0.762144	0.860547	-0.668006	-0.687742	-0.664091		Gohir.D02G202800.1	-0.512068	-0.343488	-0.312716	0.42261	0.587916	0.157745
Gohir.A01G094200.2	0.878802	0.992812	0.93377	-0.639016	-1.07214	-1.09423		Gohir.A06G123800.1	-1.33175	-1.54853	-1.36588	0.847104	1.58498	1.81407
Gohir.A05G154700.1	2.1338	1.55008	1.40731	-1.38329	-1.87707	-1.83083		Gohir.D02G079000.1	-0.578862	-1.29006	-0.798706	0.395641	1.07812	1.19388
Gohir.A08G139200.1	0.9981	1.49509	1.31373	-0.915497	-1.37868	-1.51274		Gohir.D07G209400.1	-0.8535	-1.08592	-1.64611	1.07194	1.61413	0.899459
Gohir.A11G239200.1	0.630756	1.27042	0.791278	-1.3758	-0.574409	-0.74224		Gohir.A13G152000.1	-2.21082	-1.16539	-0.425795	0.482036	1.74583	1.57413
Gohir.D05G002000.1	0.0738095	1.88889	1.61509	-0.958527	-1.40369	-1.21557		Gohir.D11G232100.1	-0.630145	-2.21489	-1.49838	1.99343	1.31914	1.03085
Gohir.D13G189800.1	0.533858	1.41824	1.24941	-0.828892	-1.2926	-1.08002		Gohir.A13G222800.1	-0.772618	-1.69906	-1.38384	1.1033	1.43392	1.31829
Gohir.D12G176500.2	2.0194	1.82172	1.48274	-1.70618	-1.84501	-1.77266		Gohir.D10G020700.1	-0.575152	-0.627568	-0.448694	0.740362	0.133717	0.777335
Gohir.A05G200400.1	0.741039	1.66352	0.914731	-1.04001	-1.48362	-0.795663		Gohir.D05G323200.2	-0.461273	-0.670274	-0.652441	-0.0145046	0.903882	0.894612
Gohir.A10G027800.1	2.93874	1.37905	1.40363	-2.25798	-1.58427	-1.87917		Gohir.D02G004100.2	-0.4211	-0.58331	-0.58331	0.453018	0.905719	0.228983
Gohir.A05G227701.1	0.877039	1.69877	0.96477	-0.789956	-1.36554	-1.38508		Gohir.A05G170500.2	-0.691304	-1.34806	-2.34927	1.19192	1.5947	1.60202
Gohir.A07G127600.1	1.22695	1.72867	1.41183	-1.57188	-1.16664	-1.62893		Gohir.A03G124900.1	-0.676287	-1.31841	-1.37147	0.457599	1.49884	1.40973
Gohir.D12G112000.1	0.123501	1.31733	1.16028	-0.720792	-1.08543	-0.794892		Gohir.D01G093400.2	-0.755482	-0.996211	-1.16101	0.596377	1.10855	1.20778
Gohir.D02G203009.1	0.170472	0.919208	0.707048	-0.552098	-0.483024	-0.761606		Gohir.D04G119900.1	-0.774589	-1.13208	-0.814481	1.13355	0.803488	0.784114
Gohir.D10G179800.1	2.3623	1.97237	0.87276	-1.73581	-1.73581	-1.73581		Gohir.D06G186900.1	-0.358308	-1.75503	-2.19297	0.666976	1.96183	1.67749
Gohir.D05G236400.1	1.01334	0.593481	0.132669	-0.355925	-0.748353	-0.635209		Gohir.D11G155600.1	-0.543883	-0.658124	-0.651712	-0.00585249	0.867811	0.99176
Gohir.A08G105100.1	1.32158	0.716303	0.51619	-0.928477	-0.805473	-0.820119		Gohir.D05G066100.2	-0.766743	-1.2802	-0.873809	0.556621	1.14861	1.21551
Gohir.A07G149300.1	1.54562	0.680726	0.33056	-0.979198	-0.829939	-0.747766		Gohir.D05G053400.1	-1.04958	-1.29296	-0.818012	0.866128	1.08887	1.20555
Gohir.D11G177100.1	0.656233	1.59312	1.50243	-1.05495	-1.33892	-1.35792		Gohir.A09G127800.1	-0.988451	-1.70333	-2.10866	0.504328	2.48103	1.81508
Gohir.D03G134500.1	1.22339	2.05963	1.61207	-1.8478	-1.49229	-1.555		Gohir.D13G218000.3	-0.75903	-2.14279	-2.08332	1.06253	1.85858	2.06403
Gohir.A10G080600.1	0.845562	1.40866	1.32038	-0.824424	-1.6449	-1.10527		Gohir.A08G165050.1	-1.85243	-1.85243	-1.85243	2.27561	1.36774	1.91395
Gohir.A11G143700.1	0.588418	0.949874	1.09409	-0.683476	-0.955425	-0.993481		Gohir.D03G053400.1	-0.863725	-1.7713	-1.10235	1.49285	1.32666	0.917877
Gohir.D04G020800.1	0.553247	1.0137	1.03947	-0.705826	-0.858058	-1.04254		Gohir.D06G129150.1	-0.807749	-0.807749	-0.807749	0.701186	0.490322	1.23174
Gohir.D05G214600.1	0.365891	1.7639	1.69529	-1.55783	-1.20785	-1.0594		Gohir.D11G217800.1	-0.414173	-1.32799	-1.33952	1.07166	0.959198	1.05083
Gohir.D01G088500.1	2.05383	1.29834	0.958918	-1.45898	-1.51196	-1.34014		Gohir.A09G135100.1	-1.00179	-1.4059	-0.715135	0.946929	0.799241	1.37666
Gohir.D05G300300.1	0.968812	0.917105	0.82639	-0.5106	-1.1382	-1.0635		Gohir.A13G053554.1	-0.722784	-1.56511	-1.45997	1.16467	1.36553	1.21765
Gohir.D10G033200.1	0.74566	-0.106052	0.932308	-0.523972	-0.523972	-0.523972		Gohir.D07G098000.1	-0.776077	-0.44588	-0.722851	0.621849	0.727986	0.594973
Gohir.D08G222300.1	-0.0213437	1.2196	1.57262	-0.863056	-0.828189	-1.07963		Gohir.D03G040500.2	-0.892831	-1.65478	-0.599913	0.642836	1.23618	1.26851
Gohir.A11G159500.1	0.247928	1.06006	0.918895	-0.536068	-0.819953	-0.870858		Gohir.A13G066151.1	-0.399273	-0.561483	-0.326369	0.121989	0.426202	0.738934
Gohir.D05G090500.1	0.51115	1.55339	1.06707	-1.65258	-0.863746	-0.615285		Gohir.A09G129900.1	-0.412355	-0.596678	-0.497993	0.557558	0.57126	0.378209
Gohir.D04G075200.2	0.685856	0.705959	0.675851	-0.566762	-0.99821	-0.502694		Gohir.D10G089800.1	-1.15443	-0.705368	-0.658225	0.646514	1.05288	0.818633
Gohir.A04G009700.1	0.133416	1.61504	1.43457	-0.945099	-1.15158	-1.08634		Gohir.D11G061000.1	-0.393855	-2.08931	-0.813156	1.08693	1.05938	1.15001
Gohir.D02G015300.2	0.999116	0.630925	0.226883	-0.471125	-0.823202	-0.562597		Gohir.A03G175450.1	-0.675379	-1.28135	-1.28135	0.634747	1.38336	1.21996
Gohir.A08G017600.1	1.20037	1.22334	1.08989	-0.937136	-1.36661	-1.20985		Gohir.A10G197600.1	-0.599704	-1.1986	-0.900245	1.24975	0.763157	0.68564
Gohir.A02G174700.1	0.825368	0.574205	0.395435	-0.622421	-0.519296	-0.653291		Gohir.A05G009700.1	-1.25029	-0.982248	-1.20668	0.630008	1.42659	1.38262
Gohir.A11G129300.1	1.70131	1.0998	0.641341	-1.00587	-1.09907	-1.33752		Gohir.A08G044400.1	-0.637694	-0.995844	-1.50917	-0.079561	1.78537	1.4369
Gohir.D11G028100.1	1.31759	0.446641	0.593272	-0.777929	-0.832901	-0.74667		Gohir.A05G195600.1	-1.25936	-1.48119	-0.939306	1.01767	1.28278	1.3794
Gohir.A11G009500.1	0.578555	1.02392	0.976885	-0.790475	-0.955342	-0.833543		Gohir.A06G128000.1	-0.702095	-0.988839	-1.24114	1.47768	0.782621	0.671768
Gohir.D03G150600.1	0.712574	0.648622	0.517134	-0.576498	-0.59937	-0.702463		Gohir.D07G221700.1	-0.513868	-1.52478	-1.01374	1.04301	1.02659	0.982785
Gohir.A07G009100.1	0.296023	1.29021	1.56724	-1.21058	-0.805646	-1.13724		Gohir.D11G116200.1	-0.886859	-1.54589	-1.27966	0.895439	1.34729	1.46969
Gohir.D08G201200.4	0.91298	0.614254	0.263769	-0.508899	-0.533858	-0.748246		Gohir.A09G213676.1	-0.40806	-0.695522	-1.23919	1.24005	0.569441	0.533278
Gohir.D05G209501.1	0.730709	0.890455	0.325462	-0.238004	-0.812803	-0.89582		Gohir.A05G329000.1	-0.586528	-0.746863	-0.871277	0.761121	0.833997	0.60955
Gohir.A02G077000.1	-0.13592	1.64076	1.34255	-1.0645	-0.952126	-0.830768		Gohir.A05G226700.1	-0.820379	-1.56121	-1.54454	1.60872	1.03957	1.27784
Gohir.D07G085800.1	0.375323	1.67292	1.69386	-1.14185	-1.44318	-1.15707		Gohir.A06G023466.1	-1.56303	-1.56303	-1.56303	2.00159	0.655133	2.03236
Gohir.D05G020500.1	0.517968	1.33702	1.15202	-0.45631	-1.37154	-1.17915		Gohir.D12G083200.3	-0.325425	-1.13766	-1.29706	1.06849	0.76904	0.922605
Gohir.D12G102900.1	1.53641	1.1274	0.751929	-1.35123	-1.15217	-0.912345		Gohir.A08G239000.1	-0.378755	-0.433565	-0.480405	0.754709	0.536091	0.00192652
Gohir.D02G021500.1	0.406239	0.76397	0.704957	-0.299031	-0.746036	-0.8301		Gohir.D05G233400.1	-1.08041	-0.947305	-0.263296	0.375617	0.977423	0.937972
Gohir.D01G079566.1	0.870394	1.27166	1.20393	-1.01728	-1.20535	-1.12335		Gohir.D11G062700.1	-0.745496	-1.27644	-0.79997	1.44281	0.842484	0.536609
Gohir.D09G145700.1	0.858064	1.44193	1.29546	-1.1605	-1.23263	-1.20234		Gohir.D01G184800.1	-0.704529	-1.46813	-1.67018	0.785821	1.57636	1.48066
Gohir.D08G201300.1	0.139888	1.80747	1.41518	-0.75728	-1.13509	-1.47017		Gohir.A01G226700.1	-0.555916	-2.05533	-1.99198	1.60898	1.45542	1.53883
Gohir.A01G191600.2	0.667256	0.868554	0.282249	-0.70305	-0.489613	-0.625397		Gohir.A01G126300.2	-0.838879	-2.06091	-1.75512	1.64945	1.51743	1.48804
Gohir.A12G058200.2	0.378993	1.43601	1.68282	-1.04957	-1.10201	-1.34625		Gohir.A10G150100.1	-0.957727	-1.35716	-2.45133	1.55333	1.75722	1.45567
Gohir.D12G188600.1	0.184873	1.84443	1.69368	-1.40989	-1.2108	-1.10228		Gohir.A11G261100.1	-0.940417	-1.56586	-1.01532	1.42266	1.00526	1.09368
Gohir.A11G008800.1	0.477695	0.808491	0.299478	-0.510945	-0.725251	-0.349468		Gohir.A11G190700.1	-0.584305	-0.748824	-1.00189	0.419831	1.02279	0.892402
Gohir.A02G107300.1	0.209927	0.570733	1.0325	-0.63121	-0.412884	-0.769069		Gohir.D08G143900.2	-0.288524	-0.728945	-0.521052	0.34007	0.632262	0.56619
Gohir.A06G067100.1	1.76124	1.17548	1.10598	-1.35482	-1.39675	-1.29112		Gohir.D10G179200.1	-1.28517	-1.37219	-0.969499	1.67183	1.34329	0.611741
Gohir.D10G169900.1	1.5374	1.79833	0.917507	-1.37423	-1.72473	-1.15427		Gohir.D01G168300.1	-0.999446	-1.46812	-1.50253	1.03324	1.49799	1.43888
Gohir.D08G163800.1	0.817457	0.904714	0.745217	-0.750862	-1.19913	-0.517397		Gohir.D02G175700.2	-0.506515	-0.455031	-0.509138	0.530355	0.384653	0.555677
Gohir.D10G061100.1	1.29787	1.73988	1.59955	-1.64761	-1.52996	-1.45973		Gohir.D13G093066.1	-0.870191	-0.479671	-2.33875	0.97373	0.738486	1.9764
Gohir.A11G294400.2	0.605585	1.3272	1.3555	-0.908255	-0.972207	-1.40783		Gohir.A13G122133.1	-1.23416	-1.48721	-2.26626	1.62827	1.21853	2.14082
Gohir.D03G167100.2	-0.0611388	1.06718	1.31562	-0.794677	-0.713846	-0.813134		Gohir.D05G266050.1	-0.492337	-0.593987	-0.305924	0.219948	0.511691	0.660607
Gohir.A03G138400.1	0.312372	1.78991	1.73083	-0.928546	-1.51638	-1.38818		Gohir.D09G137200.1	-0.603984	-0.575658	-0.849768	0.492369	0.761708	0.775334
Gohir.D02G067600.1	1.39711	0.621699	0.575426	-0.905741	-0.861757	-0.826742		Gohir.D03G002100.1	-0.53546	-0.944638	-0.799063	0.926397	0.791799	0.560966
Gohir.D07G158900.1	1.77016	1.31167	1.08474	-1.14406	-1.47131	-1.55119		Gohir.D04G112833.1	-1.12473	-1.12473	-1.12473	2.69728	1.80165	-1.12473
Gohir.D02G088300.1	1.66801	1.55876	0.324597	-1.34189	-1.5475	-0.661969		Gohir.D11G023200.1	-0.680896	-1.07567	-0.799541	0.861183	0.717822	0.977097
Gohir.D04G065600.1	0.595276	1.22819	1.02297	-0.767506	-0.715925	-1.36301		Gohir.A02G020200.1	-0.540506	-2.6665	-1.11984	1.28035	1.61828	1.42821
Gohir.A11G029500.1	1.25571	1.13914	1.35216	-1.27745	-1.10321	-1.36635		Gohir.D07G103900.1	-1.36652	-1.2357	-0.88744	0.160273	1.78951	1.53988
Gohir.D02G048100.1	0.586919	0.954418	0.861789	-0.600994	-0.871427	-0.930705		Gohir.D02G218500.1	-0.490509	-0.888847	-0.634695	0.950553	0.580213	0.483284
Gohir.D02G184200.1	1.01671	1.09968	0.744555	-1.46123	-0.585887	-0.813824		Gohir.A11G046966.1	-0.911447	-1.34248	-1.41835	1.48044	0.76561	1.42623
Gohir.D12G185100.2	1.97921	0.926359	0.623335	-1.10096	-1.20769	-1.22025		Gohir.D12G245700.1	-0.555303	-0.571667	-0.801943	0.285444	1.00376	0.639713
Gohir.D08G145200.1	0.372656	0.413556	0.273478	-0.413047	-0.285667	-0.360976		Gohir.D04G144300.1	-0.401937	-0.686311	-0.890452	0.702663	0.941831	0.334206
Gohir.A07G068000.1	0.0885169	0.933809	0.805121	-0.718268	-0.673753	-0.435425		Gohir.D11G191100.1	-0.727115	-1.24831	-0.881456	0.55887	1.0245	1.27352
Gohir.A07G222000.1	0.778084	0.595871	0.147143	-0.512461	-0.454675	-0.553963		Gohir.D07G080100.1	-0.725558	-2.19538	-1.66305	1.34866	1.72684	1.50849
Gohir.D09G107900.1	0.162011	0.634663	0.996078	-0.745114	-0.686362	-0.361276		Gohir.A11G322600.1	-0.401053	-0.724935	-0.679568	0.367694	0.853495	0.584368
Gohir.D12G190100.1	1.71882	1.50502	1.40563	-1.30581	-1.48962	-1.83404		Gohir.D04G001300.2	-0.6004	-1.05319	-0.86899	0.793918	0.981429	0.747236
Gohir.A12G012600.1	1.54369	1.09622	0.676373	-1.63293	-0.958047	-0.725301		Gohir.D09G142300.1	-0.544332	-1.04467	-0.685057	0.344208	1.00778	0.922071
Gohir.D05G334800.1	0.573478	0.85243	1.46633	-0.833578	-1.02602	-1.03265		Gohir.D13G063300.1	-1.39905	-1.44823	-0.722409	1.36301	0.916356	1.29032
Gohir.D09G053100.1	2.3968	0.623638	0.362143	-1.33152	-1.22229	-0.82877		Gohir.D05G266100.1	-0.517969	-0.617947	-0.424473	0.461452	0.547991	0.550945
Gohir.A05G012400.1	0.558717	1.47216	1.48348	-0.436169	-1.82401	-1.25417		Gohir.1Z049595.1	-0.270247	-0.554404	-0.416901	0.396246	0.387633	0.457674
Gohir.A02G145000.1	1.39666	1.07322	0.813781	-0.959323	-1.15074	-1.1736		Gohir.D08G034700.1	-0.500154	-0.574839	-0.650714	0.482192	0.407256	0.836258
Gohir.A08G204100.1	0.295992	1.71321	1.3571	-1.20152	-1.17773	-0.987052		Gohir.A10G014200.1	-0.56902	-0.716978	-0.831013	1.17397	0.500128	0.442909
Gohir.D08G164200.1	2.08458	0.73046	0.602245	-0.927644	-1.39546	-1.09418		Gohir.A03G135000.1	-0.46616	-0.869516	-0.868148	0.51509	1.01401	0.674726
Gohir.D03G108800.1	-0.0786481	0.75532	0.923159	-0.514322	-0.55273	-0.532779		Gohir.A08G104701.1	-0.446957	-0.747908	-0.955298	0.386066	0.717323	1.04677
Gohir.A10G233300.1	0.668868	1.96984	1.87384	-1.53375	-1.46141	-1.51738		Gohir.A10G095101.1	-0.374731	-1.11339	-1.61435	1.40155	0.882932	0.818001
Gohir.D01G219300.1	-0.156487	0.868994	1.2225	-0.645002	-0.645002	-0.645002		Gohir.A12G093400.1	-0.6077	-0.6077	-0.6077	0.615722	0.394462	0.812917
Gohir.A12G117000.1	1.13511	0.500075	0.349289	-0.66149	-0.66149	-0.66149		Gohir.D05G237200.1	-0.426026	-0.756943	-0.961084	0.417428	0.714281	1.01234
Gohir.A12G122700.1	1.79562	0.325178	0.286471	-0.557112	-0.910363	-0.939794		Gohir.A05G173300.1	-0.66775	-1.22938	-1.10531	0.817412	1.04802	1.13701
Gohir.D02G018000.1	0.38373	1.22541	0.974047	-0.706515	-0.832725	-1.04394		Gohir.D01G049800.1	-0.715587	-1.18223	-1.15476	0.802915	1.09704	1.15263
Gohir.A11G312000.1	0.13194	1.29422	0.718631	-0.768409	-0.563178	-0.813207		Gohir.D05G179300.1	-0.357562	-2.57556	-3.24621	1.56797	2.39007	2.22129
Gohir.A11G255300.1	0.0394697	1.48406	1.55317	-1.17275	-0.81919	-1.08476		Gohir.D04G025500.1	-0.403978	-0.508103	-0.657363	0.00893944	0.63483	0.925675
Gohir.A02G007000.1	0.982871	1.48619	1.38238	-1.01187	-1.51364	-1.32594		Gohir.A11G296100.1	-0.579873	-1.44742	-1.9723	1.13592	1.52567	1.33801
Gohir.A02G031500.1	1.08343	1.15828	0.821561	-0.919481	-1.06412	-1.07967		Gohir.A01G056900.1	-0.545985	-0.6848	-0.622678	0.961363	0.523093	0.369007
Gohir.D08G220000.1	1.40546	0.855781	0.699738	-0.751625	-0.868332	-1.34102		Gohir.A05G061800.1	-0.251451	-0.711932	-0.57574	0.343958	0.502193	0.692972
Gohir.A03G009200.1	0.814219	2.03942	1.75257	-1.02356	-1.80735	-1.7753		Gohir.A11G147400.2	-0.645595	-0.492415	-0.392046	0.795822	0.119562	0.614672
Gohir.D05G080900.1	0.81098	1.14099	1.31449	-1.15702	-1.01382	-1.09562		Gohir.D11G067800.2	-0.844672	-1.06782	-0.898994	0.781944	1.04227	0.987271
Gohir.A06G131100.1	1.32815	0.867647	0.828599	-1.00813	-1.00813	-1.00813		Gohir.A03G028300.1	-0.97138	-1.14437	-1.10352	1.35092	0.913928	0.954421
Gohir.D10G236600.1	0.348671	1.03542	0.368278	-0.644218	-0.659578	-0.448575		Gohir.A10G058300.1	-0.330975	-1.35921	-1.02716	1.20239	0.870643	0.644304
Gohir.D05G177100.1	0.883684	0.78381	0.876554	-0.892941	-1.09303	-0.558074		Gohir.D12G055075.1	-0.638694	-0.750028	-1.42937	-0.119564	0.951466	1.98619
Gohir.A13G158800.1	0.0397221	1.53054	1.18549	-0.69693	-0.931902	-1.12692		Gohir.A11G111000.1	-0.815852	-1.257	-1.07104	0.987898	0.924739	1.23126
Gohir.D05G172400.1	0.525383	1.13144	1.44525	-0.834096	-1.47859	-0.789394		Gohir.A07G173200.1	-0.661948	-0.517357	-0.863371	0.521293	1.09724	0.424147
Gohir.D03G044200.1	2.15816	0.556877	0.512355	-1.04804	-0.924692	-1.25466		Gohir.A09G144300.1	-0.706881	-0.76233	-0.931641	0.176163	1.2275	0.997193
Gohir.D03G041200.1	-0.27817	1.23622	1.58686	-0.844614	-1.05164	-0.64865		Gohir.A07G233200.2	-0.363945	-0.595378	-0.595378	0.20288	0.770875	0.580945
Gohir.D05G118600.5	1.96128	0.931527	0.723972	-1.08789	-1.2651	-1.26379		Gohir.D13G006700.1	-0.856555	-1.29179	-0.537282	0.928823	0.90154	0.855269
Gohir.D11G041950.1	1.43321	1.4147	1.35411	-1.0606	-1.52635	-1.61508		Gohir.A05G121000.1	-1.65438	-0.80769	-0.592357	0.537775	1.16812	1.34853
Gohir.D03G038900.1	1.83161	1.57323	0.188894	-1.15718	-1.27028	-1.16627		Gohir.D10G150900.1	-1.20327	-1.88289	-0.931947	0.474076	1.67986	1.86417
Gohir.D10G166000.1	0.831864	1.71703	1.49939	-1.33185	-1.44101	-1.27542		Gohir.A05G238200.1	-0.849251	-0.928805	-0.759476	-0.152427	1.22313	1.46683
Gohir.A06G170800.1	0.671845	1.11468	1.07163	-0.755625	-1.1116	-0.990937		Gohir.A12G052750.1	-0.898834	-0.898834	-0.898834	1.62548	1.96985	-0.898834
Gohir.A05G252900.1	0.471753	0.674845	0.892454	-0.694353	-0.604222	-0.740478		Gohir.D01G147700.1	-0.805103	-1.69851	-1.00477	1.04267	1.1642	1.30151
Gohir.D12G101000.1	2.90516	1.36724	1.24384	-2.21305	-1.49699	-1.8062		Gohir.A05G051800.1	-0.923803	-1.547	-1.16265	1.29524	1.21835	1.11986
Gohir.D13G037500.1	1.2975	0.759444	1.06599	-1.2168	-0.786444	-1.11969		Gohir.A09G169600.2	-0.421851	-0.433408	-0.50341	0.0357193	0.748643	0.574307
Gohir.A01G060500.1	0.185752	1.59415	1.72004	-1.47134	-1.03471	-0.993891		Gohir.D13G149200.1	-0.456659	-0.523139	-0.938177	0.263457	0.780974	0.873543
Gohir.D03G170966.1	1.94032	0.672445	0.405441	-0.934615	-1.10197	-0.981621		Gohir.D10G142900.1	-1.06463	-1.06463	-1.06463	1.97697	0.731139	0.48578
Gohir.A13G152500.1	0.622115	1.29473	1.04435	-1.14764	-0.700855	-1.11271		Gohir.A04G025800.1	-0.301655	-1.00044	-0.608665	0.406673	0.77606	0.728028
Gohir.D09G037200.1	1.06069	0.532937	0.450618	-0.658115	-0.767332	-0.618796		Gohir.D12G265400.1	-0.471589	-2.13569	-1.86688	0.829504	1.76369	1.88096
Gohir.A11G269100.1	1.04661	0.799036	0.453429	-0.987996	-0.639908	-0.671172		Gohir.D09G129800.1	-0.686491	-0.775989	-0.639798	0.664431	0.394577	1.04327
Gohir.D03G148300.1	0.544096	1.83805	1.49736	-1.10899	-1.41636	-1.35415		Gohir.A03G105000.2	-1.26652	-0.596172	-0.705907	0.882251	0.930979	0.755371
Gohir.A05G216100.1	0.539317	1.2127	1.04185	-1.06618	-0.769866	-0.95782		Gohir.A11G200300.1	-0.509202	-0.786026	-0.671095	-0.0771105	1.26184	0.781597
Gohir.D01G074800.1	0.833998	0.665752	0.721499	-0.746642	-0.651702	-0.822904		Gohir.A11G321500.1	-0.773425	-1.35868	-1.86096	1.11486	1.52153	1.35669
Gohir.D05G184400.1	0.446594	1.82324	1.71866	-1.42988	-1.2635	-1.29512		Gohir.A05G059200.1	-0.550205	-0.613192	-0.33556	0.00980639	0.790964	0.698186
Gohir.A10G121300.1	0.742407	1.08667	0.755206	-0.928471	-0.78508	-0.870736		Gohir.D12G047600.1	-0.109249	-2.08704	-1.83585	1.2191	1.51857	1.29448
Gohir.A01G122000.1	0.334555	0.954799	0.846255	-0.940778	-0.725017	-0.469814		Gohir.D04G183200.1	-0.298698	-2.29143	-1.49291	1.38446	1.39681	1.30177
Gohir.A07G006200.1	0.605124	1.6955	1.40519	-1.08938	-1.11453	-1.50189		Gohir.D09G005800.1	-0.640556	-1.43258	-1.43121	0.765064	1.58325	1.15603
Gohir.D11G308720.1	1.64675	0.741047	0.485014	-0.974653	-1.04634	-0.851823		Gohir.A07G217000.1	-0.941947	-1.23662	-1.45678	1.13488	1.27491	1.22555
Gohir.A06G099900.2	0.410105	0.387314	0.881018	-0.770054	-0.513901	-0.394482		Gohir.D05G350400.2	-0.352566	-0.988855	-1.02628	0.877879	0.874864	0.614954
Gohir.A07G211400.1	1.57086	0.630794	0.16894	-0.424893	-0.966039	-0.979667		Gohir.A11G102400.1	-0.839403	-0.764016	-0.717046	0.235372	1.29696	0.788135
Gohir.A08G102900.1	1.10465	0.985172	0.197417	-0.518523	-1.19386	-0.574861		Gohir.A07G083200.2	-0.552511	-0.650403	-0.477743	0.206539	0.64556	0.828557
Gohir.D10G199000.2	1.22544	1.46441	1.25716	-1.04832	-1.51679	-1.3819		Gohir.A05G204700.1	-0.23884	-0.589337	-0.589337	0.378569	0.433563	0.605381
Gohir.D12G050800.1	1.179	1.42339	1.4046	-1.28288	-1.46614	-1.25798		Gohir.D11G102500.1	-0.556203	-0.480223	-0.317102	0.212606	0.722738	0.418184
Gohir.A04G046800.1	1.2233	0.470483	0.598778	-0.664985	-0.846142	-0.781436		Gohir.A01G059700.1	-0.692023	-1.83535	-2.10841	1.16074	1.76215	1.71289
Gohir.D09G130300.1	1.20428	1.37795	1.0433	-0.874543	-1.53759	-1.21339		Gohir.A02G027300.1	-0.985947	-1.95391	-2.90568	1.68793	2.25558	1.90202
Gohir.A12G274400.1	1.42113	0.755853	1.15098	-1.12873	-1.1246	-1.07464		Gohir.A08G179001.1	-0.36568	-0.44842	-0.545543	0.184171	0.639632	0.53584
Gohir.A10G036500.1	0.851834	1.0065	0.826159	-0.73175	-1.06695	-0.885796		Gohir.D03G165600.1	-0.977165	-0.877943	-0.95751	0.442577	1.29061	1.07943
Gohir.A04G091100.1	1.94692	1.21392	0.42872	-0.982532	-1.31517	-1.29186		Gohir.D10G144500.1	-0.802729	-1.10302	-0.505049	0.692054	0.903682	0.815056
Gohir.D11G025050.1	0.552602	1.77799	1.83377	-1.94565	-1.17269	-1.04602		Gohir.D06G020400.1	-0.461994	-1.94213	-1.88227	1.63356	1.52285	1.12998
Gohir.A11G323200.1	0.455393	0.897834	1.08948	-0.792394	-0.969774	-0.680541		Gohir.A01G211600.1	-1.01241	-1.29427	-1.54293	1.32395	1.51339	1.01228
Gohir.A09G183600.1	1.60454	0.360872	0.365412	-0.486821	-0.799236	-1.04477		Gohir.A01G063400.1	-0.962247	-1.15203	-0.937005	0.827106	1.11566	1.10852
Gohir.D02G054500.1	0.102429	1.24238	1.22952	-1.06426	-0.905327	-0.604742		Gohir.A09G211000.1	-0.578001	-1.17541	-1.17541	1.11206	0.712113	1.10465
Gohir.D08G012900.1	0.629527	1.21683	1.46699	-1.16382	-1.05576	-1.09376		Gohir.A04G065100.1	-0.556136	-0.911082	-0.808082	0.873808	0.605202	0.796291
Gohir.D03G026700.1	0.241894	1.24027	1.07293	-0.497097	-0.908537	-1.14946		Gohir.A11G154200.1	-0.45994	-0.945642	-0.616609	1.14142	0.476835	0.403931
Gohir.A05G072400.1	-0.511206	1.60824	1.61704	-1.06923	-0.799142	-0.845696		Gohir.D12G072300.1	-0.331004	-0.662449	-0.821065	0.527647	0.56741	0.719462
Gohir.D06G093900.1	1.70344	0.987192	0.800917	-0.99788	-1.04685	-1.44682		Gohir.D08G151700.1	-0.6582	-0.998328	-0.830617	0.321741	1.26509	0.90031
Gohir.D11G318000.1	0.283794	0.433108	0.676403	-0.459581	-0.490748	-0.442976		Gohir.D01G107700.1	-0.41574	-0.975828	-0.767921	0.481462	0.912106	0.765922
Gohir.D02G234000.1	0.560256	1.10472	1.23146	-0.756527	-0.994567	-1.14535		Gohir.D02G099000.2	-0.911969	-1.53577	-1.12307	1.24949	0.846486	1.47483
Gohir.D11G125000.1	0.405983	1.14215	0.841943	-0.8965	-0.874981	-0.618596		Gohir.D03G061701.1	-0.315525	-0.686247	-0.398184	0.713198	0.279445	0.407313
Gohir.A07G092200.1	0.523188	1.1506	1.5771	-1.02802	-0.819846	-1.40302		Gohir.D10G199350.1	-1.05281	-1.05281	-1.05281	2.10505	2.10618	-1.05281
Gohir.D04G055400.1	1.3989	1.49995	1.46504	-1.42619	-1.37916	-1.55854		Gohir.A03G161300.1	-0.901939	-0.814297	-0.880774	0.677938	1.03926	0.879809
Gohir.A02G163200.2	2.60973	0.731552	0.161505	-0.905449	-0.94049	-1.65685		Gohir.A02G106800.1	-0.683989	-1.29939	-1.70691	1.51186	1.11853	1.05991
Gohir.D09G102700.1	0.741148	0.695733	1.17507	-0.963783	-1.19625	-0.451918		Gohir.A01G004600.1	-1.01721	-1.96469	-1.30755	1.76534	1.25501	1.26911
Gohir.D10G063200.1	1.07983	1.8012	1.24894	-1.04203	-1.50564	-1.5823		Gohir.D01G172600.1	-0.75488	-1.99708	-1.52781	1.65134	1.38597	1.24245
Gohir.D09G062600.1	0.898205	1.0082	0.609057	-0.734998	-0.893955	-0.886506		Gohir.A01G224200.1	-1.04399	-1.70819	-1.30218	0.372615	1.51862	2.16312
Gohir.D03G084400.1	1.21552	1.6467	1.17709	-0.592746	-1.52538	-1.92119		Gohir.A12G164800.1	-0.39377	-2.46333	-1.38259	0.852633	2.17353	1.21354
Gohir.A09G166800.2	0.233485	0.824517	0.983846	-0.682343	-0.696397	-0.663107		Gohir.A07G098101.1	-0.765092	-1.63428	-0.781044	1.12483	0.396265	1.65933
Gohir.D03G134000.3	0.920182	1.17224	1.13329	-0.862436	-1.09117	-1.27211		Gohir.D07G035800.1	-0.388132	-0.932123	-0.810444	0.557934	0.729627	0.843138
Gohir.D12G058100.1	0.512136	1.22342	1.52251	-1.00098	-0.976724	-1.28036		Gohir.A03G146700.1	-1.15444	-1.81788	-1.95651	1.01837	1.84964	2.06082
Gohir.A08G001700.1	0.814265	1.26944	1.21197	-0.344386	-1.96718	-0.984109		Gohir.A09G238000.1	-0.977095	-0.812015	-0.54083	0.681078	0.872513	0.776349
Gohir.D11G249000.1	0.850652	1.44067	1.32671	-0.941503	-1.30433	-1.37219		Gohir.A13G114000.1	-0.32348	-0.634701	-0.78396	0.410127	0.604505	0.727508
Gohir.A03G033800.1	0.243588	1.34899	1.33146	-0.662899	-1.19254	-1.0686		Gohir.A11G195400.1	-0.559984	-2.10234	-2.11813	2.51691	1.3407	0.922845
Gohir.A03G134600.1	0.908228	0.890076	0.453387	-0.759342	-0.970728	-0.521622		Gohir.D08G199100.1	-0.590166	-1.20464	-1.20464	1.23923	1.03506	0.725151
Gohir.D10G204200.1	2.10849	1.09381	0.546904	-1.13684	-1.42322	-1.18913		Gohir.D01G113900.1	-0.660693	-2.25201	-1.83605	1.703	1.5746	1.47115
Gohir.D02G158800.1	0.8193	0.967973	1.01761	-0.89326	-0.968311	-0.943316		Gohir.D05G264400.1	-1.04689	-1.0335	-0.969194	0.746495	1.20991	1.09318
Gohir.A01G018380.1	0.397992	0.843158	0.363212	-0.565693	-0.598997	-0.439672		Gohir.A09G173900.1	-1.10877	-1.99929	-1.82596	1.84491	1.57146	1.51766
Gohir.A03G142100.1	0.363764	1.94831	1.59902	-0.775217	-1.71042	-1.42545		Gohir.D05G139266.1	-1.13399	-0.936048	-0.472863	0.371446	0.952888	1.21856
Gohir.D05G317700.1	3.43248	1.15931	1.55605	-2.55965	-1.72454	-1.86366		Gohir.A10G042460.1	-0.82387	-0.713356	-0.908639	0.984148	0.776501	0.685215
Gohir.A12G120300.1	0.586384	0.802411	0.579725	-0.498335	-0.614535	-0.85565		Gohir.D01G004100.1	-1.18551	-1.16322	-1.28763	1.84658	0.930447	0.859338
Gohir.D08G215400.1	-0.0259272	1.32228	1.58578	-0.705698	-1.00711	-1.16932		Gohir.A13G201000.1	-0.86179	-2.13693	-1.20152	1.80145	1.22829	1.1705
Gohir.D08G034400.1	1.24735	1.17148	0.627179	-0.777811	-0.979399	-1.2888		Gohir.D12G112466.1	-0.511221	-0.511221	-0.511221	0.544668	0.323894	0.665101
Gohir.D01G142500.1	0.194276	1.03749	0.906069	-1.12019	-0.446656	-0.57099		Gohir.A04G094200.1	-0.626305	-0.976802	-0.976802	0.150171	1.97572	0.454019
Gohir.A03G037900.1	1.54348	1.00221	0.471595	-0.33046	-1.37855	-1.30827		Gohir.D06G172500.1	-0.509987	-1.27737	-1.47953	0.980025	1.13789	1.14898
Gohir.D12G258600.1	0.309994	0.532386	0.786032	-0.542804	-0.542804	-0.542804		Gohir.A11G138900.1	-0.704123	-1.52067	-0.749553	1.17938	0.838806	0.956166
Gohir.D07G057500.1	0.7883	1.4503	1.36004	-1.1412	-1.29192	-1.16552		Gohir.D05G354300.2	-0.39873	-0.983273	-1.03322	0.729893	0.759535	0.925798
Gohir.D10G004200.1	0.816119	1.73523	1.33892	-1.03358	-1.46061	-1.39609		Gohir.D13G121800.1	-0.258189	-2.38448	-2.99335	2.08119	1.98859	1.56624
Gohir.A13G052100.1	0.204647	1.60933	1.49607	-1.11795	-1.30388	-0.888208		Gohir.A07G205200.3	-0.636907	-1.50073	-1.18431	1.13105	1.0771	1.1138
Gohir.D04G074400.1	0.866537	0.477692	0.666603	-0.823658	-0.709871	-0.477304		Gohir.D10G060100.1	-0.520739	-1.60366	-1.12814	1.49695	0.862276	0.893318
Gohir.D13G167148.1	0.638011	1.33712	1.14609	-1.06176	-1.03523	-1.02424		Gohir.A09G221400.1	-0.689747	-1.82165	-2.01093	1.78157	1.43584	1.30492
[truncated: 162 more rows]
