# Supplementary material for: Transcriptomic profiles of non-embryogenic and embryogenic callus cells in a highly regenerative upland cotton line (Gossypium hirsutum L.)
Source: BMC Dev Biol. 2020 Dec 2;20:25. doi: 10.1186/s12861-020-00230-4 (PMC7713314; doi:10.1186/s12861-020-00230-4)
Supplement: Supplementary file 6 — Additional file 6. Subcluster 1 GO enrichment. Gene ontology enrichment of subcluster 1 as determined by k-means clustering [file 12861_2020_230_MOESM6_ESM.xlsx]

## Sheet: Sheet1
Table S6. Subcluster 1 GO enrichment.
category	over_represented_pvalue	under_represented_pvalue	numDEInCat	numInCat	term	ontology	over_represented_FDR	go_term	gene_ids
GO:0055114	2.1126e-19	1	206	3378	oxidation-reduction process	BP	4.74068e-16	BP oxidation-reduction process	Gohir.A05G191700.1, Gohir.A05G191700.1, Gohir.A05G191700.1, Gohir.D12G176500.2, Gohir.D06G130000.1, Gohir.D06G130000.1, Gohir.D12G212800.1, Gohir.A11G134700.1, Gohir.A11G134700.1, Gohir.D11G250400.4, Gohir.A04G091100.1, Gohir.A04G091100.1, Gohir.A04G091100.1, Gohir.A08G222400.1, Gohir.D09G048100.1, Gohir.D09G048100.1, Gohir.A02G031500.1, Gohir.A06G007700.1, Gohir.A06G007700.1, Gohir.A06G007700.1,…
GO:0008171	1.41296e-18	1	26	91	O-methyltransferase activity	MF	1.58534e-15	MF O-methyltransferase activity	Gohir.D13G040400.1, Gohir.A03G158000.1, Gohir.A13G041700.1, Gohir.D10G199000.2, Gohir.D04G182050.1, Gohir.A12G022900.2, Gohir.D12G023500.1, Gohir.A08G105100.1, Gohir.A03G158100.1, Gohir.A10G191400.2, Gohir.A03G188300.1, Gohir.A04G132400.1, Gohir.A03G158200.2, Gohir.D12G246900.1, Gohir.D02G181300.1, Gohir.D04G182200.2, Gohir.A06G070800.4, Gohir.A04G139200.1, Gohir.D09G109200.1, Gohir.A12G246200.1,…
GO:0015267	2.6541e-13	1	23	116	channel activity	MF	1.98526e-10	MF channel activity	Gohir.D09G159600.1, Gohir.A03G038500.1, Gohir.D13G017400.1, Gohir.A04G074500.1, Gohir.A09G164100.1, Gohir.D01G203900.1, Gohir.A03G033800.1, Gohir.D05G102900.1, Gohir.D08G215400.1, Gohir.D10G245500.1, Gohir.A04G070500.1, Gohir.A10G233300.1, Gohir.A08G107100.2, Gohir.D09G145700.1, Gohir.A11G323500.1, Gohir.D06G169900.1, Gohir.A01G215200.1, Gohir.A06G164300.1, Gohir.D04G109000.1, Gohir.D10G245700.1,…
GO:0046983	7.25399e-12	1	67	921	protein dimerization activity	MF	4.06949e-09	MF protein dimerization activity	Gohir.A11G034400.3, Gohir.A05G222800.2, Gohir.D08G222300.1, Gohir.D01G113100.1, Gohir.D02G084200.1, Gohir.A03G158000.1, Gohir.D06G097200.2, Gohir.D10G199000.2, Gohir.D04G080300.1, Gohir.D06G028900.1, Gohir.A01G179100.1, Gohir.D08G228800.1, Gohir.D10G069500.1, Gohir.A09G179000.2, Gohir.A11G263200.1, Gohir.D10G018100.1, Gohir.A08G105100.1, Gohir.A06G096700.1, Gohir.D01G179500.2, Gohir.A03G158100.1,…
GO:0020037	1.49979e-11	1	80	1133	heme binding	MF	6.20376e-09	MF heme binding	Gohir.A11G134700.1, Gohir.D09G048100.1, Gohir.D04G013800.1, Gohir.A13G120300.1, Gohir.D04G154100.1, Gohir.D05G335600.1, Gohir.A07G161800.1, Gohir.D10G141701.1, Gohir.A09G143300.1, Gohir.D03G114500.1, Gohir.D12G207200.1, Gohir.D01G074800.1, Gohir.D08G192000.1, Gohir.D12G188500.2, Gohir.D05G337500.1, Gohir.A07G002400.1, Gohir.D06G115300.1, Gohir.A01G088733.1, Gohir.A01G064900.1, Gohir.D03G027300.1,…
GO:0005506	1.65876e-11	1	72	938	iron ion binding	MF	6.20376e-09	MF iron ion binding	Gohir.A11G134700.1, Gohir.D09G048100.1, Gohir.A13G120300.1, Gohir.D05G335600.1, Gohir.A07G161800.1, Gohir.A10G120700.1, Gohir.D10G141701.1, Gohir.D03G114500.1, Gohir.D12G207200.1, Gohir.D01G074800.1, Gohir.D08G192000.1, Gohir.D12G188500.2, Gohir.A05G003800.3, Gohir.A07G002400.1, Gohir.A12G194100.1, Gohir.A01G088733.1, Gohir.A01G064900.1, Gohir.D06G011800.1, Gohir.D10G145600.1, Gohir.D06G012500.1,…
GO:0016705	4.31574e-09	1	60	809	oxidoreductase activity, acting on paired donors, with incorporation or reduction of molecular oxygen	MF	1.3835e-06	MF oxidoreductase activity, acting on paired donors, with incorporation or reduction of molecular oxygen	Gohir.A11G134700.1, Gohir.A11G134700.1, Gohir.D09G048100.1, Gohir.D09G048100.1, Gohir.A13G120300.1, Gohir.A13G120300.1, Gohir.D05G335600.1, Gohir.D05G335600.1, Gohir.A07G161800.1, Gohir.A07G161800.1, Gohir.D10G141701.1, Gohir.D10G141701.1, Gohir.D03G114500.1, Gohir.D12G207200.1, Gohir.D12G207200.1, Gohir.D01G074800.1, Gohir.D01G074800.1, Gohir.D08G192000.1, Gohir.D08G192000.1, Gohir.D12G188500.2,…
GO:0006355	5.62089e-09	1	138	2761	regulation of transcription, DNA-templated	BP	1.57666e-06	BP regulation of transcription, DNA-templated	Gohir.A09G240166.1, Gohir.D07G088100.1, Gohir.D05G190900.1, Gohir.A11G096100.1, Gohir.D09G240950.1, Gohir.A05G053500.1, Gohir.D11G074500.1, Gohir.A08G102900.1, Gohir.A08G102900.1, Gohir.D06G034300.1, Gohir.D06G034300.1, Gohir.D05G359800.1, Gohir.A05G078000.1, Gohir.A03G146100.1, Gohir.A03G146100.1, Gohir.A11G248300.1, Gohir.D11G258700.1, Gohir.A03G020200.1, Gohir.A07G080000.1, Gohir.A04G124500.2,…
GO:0016491	1.00558e-08	1	100	1751	oxidoreductase activity	MF	2.44924e-06	MF oxidoreductase activity	Gohir.D12G176500.2, Gohir.D06G130000.1, Gohir.D12G212800.1, Gohir.A04G091100.1, Gohir.A04G091100.1, Gohir.A08G222400.1, Gohir.A06G007700.1, Gohir.A06G007700.1, Gohir.A11G040800.1, Gohir.A11G040800.1, Gohir.D10G110500.1, Gohir.A11G327800.1, Gohir.D06G107000.1, Gohir.A08G011100.1, Gohir.D08G064700.1, Gohir.D08G021500.1, Gohir.D13G209800.1, Gohir.A06G082000.1, Gohir.D07G011600.1, Gohir.D07G011600.1,…
GO:0042742	1.09146e-08	1	6	9	defense response to bacterium	BP	2.44924e-06	BP defense response to bacterium	Gohir.A13G169600.1, Gohir.D11G262600.1, Gohir.D13G175100.1, Gohir.A11G252700.1, Gohir.A13G169800.1, Gohir.D13G175200.1
GO:0051537	1.47103e-07	1	13	70	2 iron, 2 sulfur cluster binding	MF	3.00091e-05	MF 2 iron, 2 sulfur cluster binding	Gohir.D13G034500.2, Gohir.D13G034500.2, Gohir.A08G011100.1, Gohir.D08G021500.1, Gohir.A03G161000.1, Gohir.A03G161000.1, Gohir.A03G160900.1, Gohir.A03G160900.1, Gohir.D02G184350.1, Gohir.D02G184350.1, Gohir.A05G408600.2, Gohir.A05G408600.2, Gohir.A05G408600.2, Gohir.D02G184300.1, Gohir.D02G184300.1, Gohir.D09G218400.1, Gohir.A08G011000.1, Gohir.A09G104100.1, Gohir.D08G021400.2, Gohir.A05G252900.1
GO:0009654	3.73353e-07	1	10	46	photosystem II oxygen evolving complex	CC	6.98171e-05	CC photosystem II oxygen evolving complex	Gohir.D11G276600.1, Gohir.D11G194600.1, Gohir.D07G158900.1, Gohir.A01G188600.1, Gohir.A11G266300.1, Gohir.A07G152700.1, Gohir.D04G034900.2, Gohir.A11G188100.1, Gohir.D01G024400.1, Gohir.D05G330700.1
GO:0009496	7.479e-07	1	4	4	plastoquinol--plastocyanin reductase activity	MF	0.000127653	MF plastoquinol--plastocyanin reductase activity	Gohir.A03G161000.1, Gohir.A03G161000.1, Gohir.A03G160900.1, Gohir.A03G160900.1, Gohir.D02G184350.1, Gohir.D02G184350.1, Gohir.D02G184300.1, Gohir.D02G184300.1
GO:0015979	7.96412e-07	1	19	282	photosynthesis	BP	0.000127653	BP photosynthesis	Gohir.A08G188400.1, Gohir.D08G206800.1, Gohir.A03G161000.1, Gohir.D11G276600.1, Gohir.A11G248900.1, Gohir.D07G158900.1, Gohir.A01G188600.1, Gohir.A11G266300.1, Gohir.A03G160900.1, Gohir.D02G184350.1, Gohir.D02G184300.1, Gohir.D07G013766.1, Gohir.A07G152700.1, Gohir.1Z049558.1, Gohir.D04G034900.2, Gohir.D01G024400.1, Gohir.A02G031301.1, Gohir.D05G145900.1, Gohir.D05G330700.1
GO:0005576	9.82059e-07	1	18	176	extracellular region	CC	0.000146916	CC extracellular region	Gohir.D08G095500.1, Gohir.A08G163500.1, Gohir.A08G163500.1, Gohir.D11G111100.1, Gohir.A07G098800.1, Gohir.D05G186900.1, Gohir.A10G179500.1, Gohir.D12G142300.1, Gohir.D12G142300.1, Gohir.D03G030200.1, Gohir.D13G076200.1, Gohir.D08G183200.1, Gohir.D08G183200.1, Gohir.A12G012600.1, Gohir.D10G186200.1, Gohir.D08G183300.1, Gohir.D08G183300.1, Gohir.A13G076500.1, Gohir.D12G180900.1, Gohir.D08G095400.1,…
GO:0042651	2.27057e-06	1	6	24	thylakoid membrane	CC	0.000318448	CC thylakoid membrane	Gohir.A03G161000.1, Gohir.A03G160900.1, Gohir.D02G184350.1, Gohir.D02G184300.1, Gohir.D01G024400.1, Gohir.D05G330700.1
GO:0042744	5.77801e-06	0.999998	19	189	hydrogen peroxide catabolic process	BP	0.000738145	BP hydrogen peroxide catabolic process	Gohir.D04G013800.1, Gohir.D04G154100.1, Gohir.D05G337500.1, Gohir.D06G115300.1, Gohir.D03G027300.1, Gohir.A05G401800.1, Gohir.A08G220700.1, Gohir.A07G217900.1, Gohir.A03G024000.1, Gohir.D08G088600.1, Gohir.A09G151200.1, Gohir.D08G249300.1, Gohir.D03G144400.1, Gohir.A05G374600.1, Gohir.A03G172900.1, Gohir.D09G124500.1, Gohir.A08G079100.1, Gohir.D03G144500.1, Gohir.D12G089200.1
GO:0008168	5.92095e-06	0.999998	33	438	methyltransferase activity	MF	0.000738145	MF methyltransferase activity	Gohir.D06G070400.1, Gohir.A05G266700.4, Gohir.A03G158000.1, Gohir.A05G267400.1, Gohir.A10G117300.1, Gohir.D10G199000.2, Gohir.A02G114300.2, Gohir.A02G114300.2, Gohir.D07G149900.1, Gohir.D13G162300.1, Gohir.D13G162300.1, Gohir.A08G105100.1, Gohir.A03G158100.1, Gohir.A10G191400.2, Gohir.A04G132400.1, Gohir.D10G149800.1, Gohir.A03G158200.2, Gohir.D12G246900.1, Gohir.A06G071900.1, Gohir.A12G063100.1,…
GO:0005504	8.06081e-06	0.999999	7	37	fatty acid binding	MF	0.000864866	MF fatty acid binding	Gohir.A10G226000.1, Gohir.D10G238316.1, Gohir.D10G238300.1, Gohir.A10G225966.1, Gohir.A04G010600.1, Gohir.A10G227800.1, Gohir.D05G377400.1
GO:0009627	8.06081e-06	0.999999	7	37	systemic acquired resistance	BP	0.000864866	BP systemic acquired resistance	Gohir.A10G226000.1, Gohir.D10G238316.1, Gohir.D10G238300.1, Gohir.A10G225966.1, Gohir.A04G010600.1, Gohir.A10G227800.1, Gohir.D05G377400.1
GO:0009523	8.09367e-06	0.999999	12	163	photosystem II	CC	0.000864866	CC photosystem II	Gohir.A08G188400.1, Gohir.D08G206800.1, Gohir.D11G276600.1, Gohir.A11G248900.1, Gohir.D07G158900.1, Gohir.A01G188600.1, Gohir.A11G266300.1, Gohir.D07G013766.1, Gohir.A07G152700.1, Gohir.D04G034900.2, Gohir.D01G024400.1, Gohir.D05G330700.1
GO:0050832	1.15318e-05	0.999999	6	23	defense response to fungus	BP	0.00117625	BP defense response to fungus	Gohir.A13G169600.1, Gohir.D11G262600.1, Gohir.D13G175100.1, Gohir.A11G252700.1, Gohir.A13G169800.1, Gohir.D13G175200.1
GO:0009607	1.25001e-05	0.999998	11	103	response to biotic stimulus	BP	0.00121957	BP response to biotic stimulus	Gohir.A10G169466.1, Gohir.D10G175700.1, Gohir.A02G051700.1, Gohir.A10G169550.1, Gohir.D10G176000.1, Gohir.A04G103900.1, Gohir.A02G052100.1, Gohir.D10G175900.1, Gohir.A01G150800.1, Gohir.A02G141800.1, Gohir.D10G175600.1
GO:0055085	1.37545e-05	0.999992	88	1651	transmembrane transport	BP	0.00128604	BP transmembrane transport	Gohir.D03G117400.1, Gohir.D06G033600.1, Gohir.A05G022200.1, Gohir.D09G159600.1, Gohir.D05G023700.1, Gohir.D09G139500.3, Gohir.A03G038500.1, Gohir.A05G188800.1, Gohir.D10G032600.1, Gohir.D03G036100.1, Gohir.D13G017400.1, Gohir.D10G254700.1, Gohir.A06G067600.1, Gohir.A05G131900.1, Gohir.A13G054300.1, Gohir.A01G036500.1, Gohir.A01G036500.1, Gohir.A12G225100.1, Gohir.A12G225100.1, Gohir.A12G225100.1,…
GO:0006979	3.15556e-05	0.99999	22	270	response to oxidative stress	BP	0.00282787	BP response to oxidative stress	Gohir.D12G230200.1, Gohir.D04G013800.1, Gohir.D04G154100.1, Gohir.A12G227900.1, Gohir.D05G337500.1, Gohir.D06G115300.1, Gohir.D03G027300.1, Gohir.A05G401800.1, Gohir.A08G220700.1, Gohir.A07G217900.1, Gohir.A03G024000.1, Gohir.D08G088600.1, Gohir.A09G151200.1, Gohir.D08G249300.1, Gohir.D03G144400.1, Gohir.A05G374600.1, Gohir.A03G172900.1, Gohir.D09G124500.1, Gohir.A12G227700.1, Gohir.A08G079100.1,…
GO:0003677	3.2765e-05	0.999978	152	3711	DNA binding	MF	0.00282787	MF DNA binding	Gohir.A09G240166.1, Gohir.D05G190900.1, Gohir.D05G190900.1, Gohir.D09G240950.1, Gohir.D11G074500.1, Gohir.A08G102900.1, Gohir.D06G034300.1, Gohir.D10G245300.1, Gohir.D05G359800.1, Gohir.A05G078000.1, Gohir.A05G078000.1, Gohir.A03G146100.1, Gohir.A12G122700.1, Gohir.D11G331300.1, Gohir.A10G036400.1, Gohir.D05G309100.1, Gohir.A03G020200.1, Gohir.A03G020200.1, Gohir.D09G066400.1, Gohir.A11G001300.1,…
GO:0004857	3.71455e-05	0.999988	20	263	enzyme inhibitor activity	MF	0.00308721	MF enzyme inhibitor activity	Gohir.D06G218900.1, Gohir.D11G230300.1, Gohir.D06G081600.1, Gohir.A11G014800.1, Gohir.A03G057500.1, Gohir.D09G189400.1, Gohir.A12G129000.1, Gohir.D12G133000.1, Gohir.A05G141600.1, Gohir.A07G125900.2, Gohir.A11G230200.1, Gohir.A06G202800.1, Gohir.A06G084500.1, Gohir.D02G142700.1, Gohir.A03G119200.1, Gohir.A06G146000.1, Gohir.A03G057800.1, Gohir.A11G079800.1, Gohir.A03G119300.1, Gohir.D11G084500.1
GO:0030599	5.87026e-05	0.999983	17	173	pectinesterase activity	MF	0.00454237	MF pectinesterase activity	Gohir.A03G195200.1, Gohir.D06G081600.1, Gohir.A11G014800.1, Gohir.A12G129000.1, Gohir.D12G219600.1, Gohir.A05G141600.1, Gohir.A07G008900.1, Gohir.A07G125900.2, Gohir.D11G014900.2, Gohir.A12G217100.1, Gohir.A06G084500.1, Gohir.A03G119200.1, Gohir.A06G146000.1, Gohir.A11G079800.1, Gohir.D07G009200.1, Gohir.D11G084500.1, Gohir.D02G216200.1
GO:0042545	5.87026e-05	0.999983	17	173	cell wall modification	BP	0.00454237	BP cell wall modification	Gohir.A03G195200.1, Gohir.D06G081600.1, Gohir.A11G014800.1, Gohir.A12G129000.1, Gohir.D12G219600.1, Gohir.A05G141600.1, Gohir.A07G008900.1, Gohir.A07G125900.2, Gohir.D11G014900.2, Gohir.A12G217100.1, Gohir.A06G084500.1, Gohir.A03G119200.1, Gohir.A06G146000.1, Gohir.A11G079800.1, Gohir.D07G009200.1, Gohir.D11G084500.1, Gohir.D02G216200.1
GO:0016679	0.000116221	0.999996	4	10	oxidoreductase activity, acting on diphenols and related substances as donors	MF	0.00869333	MF oxidoreductase activity, acting on diphenols and related substances as donors	Gohir.A03G161000.1, Gohir.A03G160900.1, Gohir.D02G184350.1, Gohir.D02G184300.1
GO:0009664	0.000127919	0.999976	10	78	plant-type cell wall organization	BP	0.00920809	BP plant-type cell wall organization	Gohir.D11G111100.1, Gohir.A07G098800.1, Gohir.D05G186900.1, Gohir.A10G179500.1, Gohir.D13G076200.1, Gohir.D09G203900.1, Gohir.A12G012600.1, Gohir.D10G186200.1, Gohir.A13G076500.1, Gohir.D12G180900.1
GO:0016747	0.00013131	0.99995	24	318	transferase activity, transferring acyl groups other than amino-acyl groups	MF	0.00920809	MF transferase activity, transferring acyl groups other than amino-acyl groups	Gohir.D02G211400.2, Gohir.D05G182700.1, Gohir.D03G143900.1, Gohir.A05G331100.1, Gohir.A05G052701.1, Gohir.A03G130100.1, Gohir.A10G232900.1, Gohir.A05G179500.1, Gohir.D08G179000.1, Gohir.A03G190500.2, Gohir.A06G193100.1, Gohir.D13G188000.1, Gohir.A06G007000.1, Gohir.D10G245100.1, Gohir.D05G118600.5, Gohir.A03G024600.1, Gohir.A12G146800.1, Gohir.D10G245200.2, Gohir.D09G000301.1, Gohir.A10G147800.1,…
GO:0004601	0.000155258	0.999946	20	257	peroxidase activity	MF	0.0105575	MF peroxidase activity	Gohir.D04G013800.1, Gohir.D04G013800.1, Gohir.D04G013800.1, Gohir.D04G154100.1, Gohir.D04G154100.1, Gohir.D04G154100.1, Gohir.D05G337500.1, Gohir.D05G337500.1, Gohir.D05G337500.1, Gohir.D06G115300.1, Gohir.D06G115300.1, Gohir.D06G115300.1, Gohir.D03G027300.1, Gohir.D03G027300.1, Gohir.D03G027300.1, Gohir.D11G277300.1, Gohir.A05G401800.1, Gohir.A05G401800.1, Gohir.A05G401800.1, Gohir.A08G220700.1,…
GO:0016758	0.000168741	0.999933	25	339	transferase activity, transferring hexosyl groups	MF	0.0111369	MF transferase activity, transferring hexosyl groups	Gohir.A05G225300.1, Gohir.D11G308720.1, Gohir.D10G239400.2, Gohir.A11G323200.1, Gohir.D03G038900.1, Gohir.A12G049700.1, Gohir.D03G150600.1, Gohir.D03G079400.1, Gohir.A03G026300.1, Gohir.A07G101600.1, Gohir.A03G017400.1, Gohir.A01G130500.1, Gohir.D13G041300.2, Gohir.D12G110900.1, Gohir.D07G105700.1, Gohir.A05G407900.1, Gohir.D05G228000.1, Gohir.D10G239200.1, Gohir.A12G107700.2, Gohir.D03G038700.1,…
GO:0019953	0.000194271	0.999986	5	20	sexual reproduction	BP	0.0124556	BP sexual reproduction	Gohir.A08G163500.1, Gohir.D12G142300.1, Gohir.D08G183200.1, Gohir.D08G183300.1, Gohir.A08G163400.2
GO:0006952	0.000239752	0.999932	14	190	defense response	BP	0.0147153	BP defense response	Gohir.A10G169466.1, Gohir.D10G175700.1, Gohir.D02G066000.1, Gohir.A02G060600.1, Gohir.A02G051700.1, Gohir.A10G169550.1, Gohir.D10G176000.1, Gohir.A04G103900.1, Gohir.A05G074401.1, Gohir.A02G052100.1, Gohir.D10G175900.1, Gohir.A01G150800.1, Gohir.A02G141800.1, Gohir.D10G175600.1
GO:0042753	0.000242631	0.999981	5	23	positive regulation of circadian rhythm	BP	0.0147153	BP positive regulation of circadian rhythm	Gohir.D06G074600.1, Gohir.A10G236200.1, Gohir.A13G191500.1, Gohir.A05G140500.2, Gohir.A06G075600.1
GO:0045158	0.000263003	0.999987	4	18	electron transporter, transferring electrons within cytochrome b6/f complex of photosystem II activity	MF	0.015531	MF electron transporter, transferring electrons within cytochrome b6/f complex of photosystem II activity	Gohir.A03G161000.1, Gohir.A03G160900.1, Gohir.D02G184350.1, Gohir.D02G184300.1
GO:0043565	0.000349085	0.999823	39	693	sequence-specific DNA binding	MF	0.0200858	MF sequence-specific DNA binding	Gohir.D07G088100.1, Gohir.A11G096100.1, Gohir.A08G102900.1, Gohir.A08G102900.1, Gohir.D06G034300.1, Gohir.D06G034300.1, Gohir.A03G146100.1, Gohir.A03G146100.1, Gohir.A05G379600.1, Gohir.D11G100800.1, Gohir.D12G118100.1, Gohir.D12G118100.1, Gohir.A02G079600.1, Gohir.D03G031800.1, Gohir.D03G031800.1, Gohir.A02G148600.1, Gohir.A02G148600.1, Gohir.A09G007400.1, Gohir.A08G215900.1, Gohir.A05G223600.1,…
GO:0005618	0.000394563	0.999857	19	245	cell wall	CC	0.022135	CC cell wall	Gohir.A03G195200.1, Gohir.D06G081600.1, Gohir.A03G029600.1, Gohir.A11G014800.1, Gohir.A08G017600.1, Gohir.A12G129000.1, Gohir.D12G219600.1, Gohir.A05G141600.1, Gohir.A07G008900.1, Gohir.A07G125900.2, Gohir.D11G014900.2, Gohir.A12G217100.1, Gohir.A06G084500.1, Gohir.A03G119200.1, Gohir.A06G146000.1, Gohir.A11G079800.1, Gohir.D07G009200.1, Gohir.D11G084500.1, Gohir.D02G216200.1
GO:0008152	0.000614217	0.999606	78	1637	metabolic process	BP	0.0336171	BP metabolic process	Gohir.A05G225300.1, Gohir.D11G308720.1, Gohir.D06G130000.1, Gohir.A05G110600.1, Gohir.A04G091100.1, Gohir.A04G091100.1, Gohir.A12G022400.1, Gohir.D10G239400.2, Gohir.A11G040800.1, Gohir.A11G040800.1, Gohir.D06G070400.1, Gohir.A11G323200.1, Gohir.D05G144800.1, Gohir.A05G267400.1, Gohir.D07G055000.1, Gohir.D07G038800.1, Gohir.A10G117300.1, Gohir.D08G229900.1, Gohir.D05G237901.1, Gohir.D03G038900.1,…
GO:0005215	0.000631273	0.999762	19	242	transporter activity	MF	0.033728	MF transporter activity	Gohir.A05G051200.1, Gohir.A12G225100.1, Gohir.D02G051100.1, Gohir.D01G009300.1, Gohir.A03G009200.1, Gohir.D03G118300.1, Gohir.A09G020500.1, Gohir.A01G171000.1, Gohir.D09G020050.1, Gohir.A07G042800.1, Gohir.D11G272200.1, Gohir.A01G072400.1, Gohir.A02G045100.1, Gohir.A07G026000.1, Gohir.D13G189800.1, Gohir.A13G183500.1, Gohir.A05G222300.1, Gohir.A01G009700.1, Gohir.A12G197400.1
GO:0070403	0.000707638	0.999982	3	6	NAD+ binding	MF	0.0369288	MF NAD+ binding	Gohir.D04G033900.1, Gohir.A05G381400.2, Gohir.A01G062201.1
GO:0009733	0.000914209	0.999717	13	263	response to auxin	BP	0.044925	BP response to auxin	Gohir.D06G000900.1, Gohir.D05G258800.1, Gohir.A01G096800.2, Gohir.D04G165201.1, Gohir.A12G101100.1, Gohir.A06G005100.1, Gohir.D12G104000.1, Gohir.A04G123150.1, Gohir.A13G189300.1, Gohir.D01G081100.1, Gohir.D09G134500.1, Gohir.D13G126000.1, Gohir.D13G094300.1
GO:0008115	0.000920923	1	2	2	sarcosine oxidase activity	MF	0.044925	MF sarcosine oxidase activity	Gohir.D06G107000.1, Gohir.A06G104800.1
GO:0046653	0.000920923	1	2	2	tetrahydrofolate metabolic process	BP	0.044925	BP tetrahydrofolate metabolic process	Gohir.D06G107000.1, Gohir.A06G104800.1
GO:0010242	0.00097267	1	2	2	oxygen evolving activity	MF	0.0464398	MF oxygen evolving activity	Gohir.D11G194600.1, Gohir.A11G188100.1
GO:0010277	0.00106066	0.999926	4	14	chlorophyllide a oxygenase [overall] activity	MF	0.0495858	MF chlorophyllide a oxygenase [overall] activity	Gohir.A08G011100.1, Gohir.D08G021500.1, Gohir.A08G011000.1, Gohir.D08G021400.2
GO:0005975	0.00110344	0.999334	56	1114	carbohydrate metabolic process	BP	0.050533	BP carbohydrate metabolic process	Gohir.A05G074300.1, Gohir.A09G065800.1, Gohir.A05G394400.1, Gohir.A03G029600.1, Gohir.D05G111200.1, Gohir.D05G111200.1, Gohir.A12G241500.1, Gohir.D03G148300.1, Gohir.D06G002480.1, Gohir.A01G103200.1, Gohir.D01G088500.1, Gohir.D09G236400.1, Gohir.A09G120200.1, Gohir.D06G050800.1, Gohir.A03G138400.1, Gohir.D12G253800.2, Gohir.A05G189600.1, Gohir.A13G030600.1, Gohir.A12G252450.1, Gohir.A09G190200.2,…
GO:0009638	0.00121154	1	2	2	phototropism	BP	0.0543741	BP phototropism	Gohir.D08G221400.1, Gohir.A08G204100.1
GO:0008146	0.00133768	0.999682	9	92	sulfotransferase activity	MF	0.0588581	MF sulfotransferase activity	Gohir.A04G012300.1, Gohir.D04G109200.1, Gohir.A02G130400.1, Gohir.A07G059000.1, Gohir.A07G059100.1, Gohir.D03G041200.1, Gohir.D05G374100.1, Gohir.A04G012442.1, Gohir.A11G008800.1
GO:0003700	0.00160709	0.998967	67	1536	DNA-binding transcription factor activity	MF	0.0693521	MF DNA-binding transcription factor activity	Gohir.A09G240166.1, Gohir.D07G088100.1, Gohir.A11G096100.1, Gohir.D09G240950.1, Gohir.A08G102900.1, Gohir.D06G034300.1, Gohir.A03G146100.1, Gohir.A04G124500.2, Gohir.A05G379600.1, Gohir.A12G017200.2, Gohir.D06G023600.1, Gohir.D11G100800.1, Gohir.D11G041950.1, Gohir.A12G251600.1, Gohir.D12G118100.1, Gohir.D03G031800.1, Gohir.A02G148600.1, Gohir.A09G007400.1, Gohir.A06G026300.1, Gohir.A08G215900.1,…
GO:0008131	0.00172044	0.999858	4	16	primary amine oxidase activity	MF	0.0714937	MF primary amine oxidase activity	Gohir.A02G031500.1, Gohir.D02G038200.1, Gohir.D08G192100.1, Gohir.A08G173400.1
GO:0009308	0.00172044	0.999858	4	16	amine metabolic process	BP	0.0714937	BP amine metabolic process	Gohir.A02G031500.1, Gohir.D02G038200.1, Gohir.D08G192100.1, Gohir.A08G173400.1
GO:0006520	0.00178749	0.999517	10	99	cellular amino acid metabolic process	BP	0.0729294	BP cellular amino acid metabolic process	Gohir.D02G178100.1, Gohir.D07G038800.1, Gohir.D02G178200.2, Gohir.A03G155100.1, Gohir.A13G167800.1, Gohir.D13G173200.1, Gohir.A11G299500.1, Gohir.A07G023400.1, Gohir.D07G027000.1, Gohir.A04G111400.1
GO:0008483	0.00221724	0.999559	7	54	transaminase activity	MF	0.0888481	MF transaminase activity	Gohir.D02G005800.1, Gohir.D02G178100.1, Gohir.D02G178200.2, Gohir.A03G155100.1, Gohir.A02G005300.1, Gohir.A07G023400.1, Gohir.D07G027000.1
GO:0032259	0.00272989	0.999523	6	44	methylation	BP	0.107471	BP methylation	Gohir.A10G117300.1, Gohir.A02G114300.2, Gohir.D13G162300.1, Gohir.D10G149800.1, Gohir.D03G055300.1, Gohir.A13G157500.2
GO:0071949	0.00325856	0.998795	14	179	FAD binding	MF	0.126073	MF FAD binding	Gohir.A06G007700.1, Gohir.D03G064400.1, Gohir.D10G110500.1, Gohir.D07G011600.1, Gohir.A04G131600.2, Gohir.D02G019601.1, Gohir.D02G107300.1, Gohir.D06G002600.1, Gohir.D10G007100.1, Gohir.A06G182100.1, Gohir.D03G167100.2, Gohir.D06G122600.1, Gohir.A09G104100.1, Gohir.D05G040300.1
GO:0008061	0.0033881	0.999377	6	48	chitin binding	MF	0.128863	MF chitin binding	Gohir.D10G124400.1, Gohir.A10G142400.1, Gohir.D11G262600.1, Gohir.A11G252700.1, Gohir.D01G164000.2, Gohir.A01G172800.1
GO:0050660	0.00437644	0.997991	20	309	flavin adenine dinucleotide binding	MF	0.163679	MF flavin adenine dinucleotide binding	Gohir.A06G007700.1, Gohir.A06G007700.1, Gohir.A06G007700.1, Gohir.A06G007700.1, Gohir.A06G007700.1, Gohir.D10G110500.1, Gohir.D10G110500.1, Gohir.D10G110500.1, Gohir.D04G172800.1, Gohir.D07G011600.1, Gohir.D07G011600.1, Gohir.D07G011600.1, Gohir.D07G011600.1, Gohir.D07G011600.1, Gohir.D09G026700.1, Gohir.D01G165300.1, Gohir.A12G261866.1, Gohir.D02G019601.1, Gohir.D02G019601.1, Gohir.D02G019601.1,…
GO:0016717	0.00466804	0.999468	4	21	oxidoreductase activity, acting on paired donors, with oxidation of a pair of donors resulting in the reduction of molecular oxygen to two molecules of water	MF	0.171621	MF oxidoreductase activity, acting on paired donors, with oxidation of a pair of donors resulting in the reduction of molecular oxygen to two molecules of water	Gohir.D01G125900.1, Gohir.D05G124400.1, Gohir.D10G249300.1, Gohir.A10G237600.1
GO:0048544	0.00478863	0.998313	12	145	recognition of pollen	BP	0.171621	BP recognition of pollen	Gohir.D01G026300.2, Gohir.D12G111400.1, Gohir.D02G185200.2, Gohir.A03G162100.1, Gohir.D01G025700.2, Gohir.D01G058000.1, Gohir.D02G185400.2, Gohir.A03G162300.1, Gohir.D01G026100.1, Gohir.D01G058100.4, Gohir.D06G008600.2, Gohir.A11G283001.1
GO:0004553	0.00481823	0.997301	33	621	hydrolase activity, hydrolyzing O-glycosyl compounds	MF	0.171621	MF hydrolase activity, hydrolyzing O-glycosyl compounds	Gohir.A05G074300.1, Gohir.A09G065800.1, Gohir.A03G029600.1, Gohir.D05G111200.1, Gohir.A12G241500.1, Gohir.D06G002480.1, Gohir.A01G103200.1, Gohir.D01G088500.1, Gohir.D09G236400.1, Gohir.A09G120200.1, Gohir.D12G253800.2, Gohir.A05G189600.1, Gohir.A13G030600.1, Gohir.A12G252450.1, Gohir.D06G086100.1, Gohir.A09G120300.1, Gohir.A06G003300.1, Gohir.A05G110800.1, Gohir.D12G253000.1, Gohir.A05G267600.1,…
GO:0004568	0.005166	0.999155	5	39	chitinase activity	MF	0.175644	MF chitinase activity	Gohir.D06G050800.1, Gohir.D06G050800.1, Gohir.D10G124400.1, Gohir.D10G124400.1, Gohir.A10G142400.1, Gohir.A10G142400.1, Gohir.D01G164000.2, Gohir.D01G164000.2, Gohir.A01G172800.1, Gohir.A01G172800.1
GO:0006032	0.005166	0.999155	5	39	chitin catabolic process	BP	0.175644	BP chitin catabolic process	Gohir.D06G050800.1, Gohir.D10G124400.1, Gohir.A10G142400.1, Gohir.D01G164000.2, Gohir.A01G172800.1
GO:0016998	0.005166	0.999155	5	39	cell wall macromolecule catabolic process	BP	0.175644	BP cell wall macromolecule catabolic process	Gohir.D06G050800.1, Gohir.D10G124400.1, Gohir.A10G142400.1, Gohir.D01G164000.2, Gohir.A01G172800.1
GO:0009644	0.00536671	0.99986	2	6	response to high light intensity	BP	0.179745	BP response to high light intensity	Gohir.D09G228900.1, Gohir.A09G227900.1
GO:0006857	0.0055252	0.998878	6	47	oligopeptide transport	BP	0.182332	BP oligopeptide transport	Gohir.A03G009200.1, Gohir.D03G118300.1, Gohir.A09G020500.1, Gohir.D09G020050.1, Gohir.D13G189800.1, Gohir.A13G183500.1
GO:0042549	0.00672046	0.999778	2	9	photosystem II stabilization	BP	0.218561	BP photosystem II stabilization	Gohir.D11G194600.1, Gohir.A11G188100.1
GO:0046373	0.0069396	0.999836	2	4	L-arabinose metabolic process	BP	0.219331	BP L-arabinose metabolic process	Gohir.D07G129800.1, Gohir.A07G125600.1
GO:0046556	0.0069396	0.999836	2	4	alpha-L-arabinofuranosidase activity	MF	0.219331	MF alpha-L-arabinofuranosidase activity	Gohir.D07G129800.1, Gohir.A07G125600.1
GO:0004506	0.00855977	0.99882	4	24	squalene monooxygenase activity	MF	0.26678	MF squalene monooxygenase activity	Gohir.D04G172800.1, Gohir.A05G212500.1, Gohir.D04G172750.1, Gohir.D04G172700.1
GO:0022857	0.0105091	0.993782	33	651	transmembrane transporter activity	MF	0.323047	MF transmembrane transporter activity	Gohir.D05G236400.1, Gohir.D09G139500.3, Gohir.A05G131900.1, Gohir.A13G054300.1, Gohir.A12G225100.1, Gohir.A12G225100.1, Gohir.D02G051100.1, Gohir.D02G051100.1, Gohir.A08G082200.1, Gohir.A13G126300.1, Gohir.A09G143300.1, Gohir.D10G133200.2, Gohir.A03G179800.2, Gohir.D01G009300.1, Gohir.D01G009300.1, Gohir.A13G052100.1, Gohir.D10G135100.1, Gohir.A03G009200.1, Gohir.D03G118300.1, Gohir.A09G020500.1,…
GO:0004602	0.0107853	0.998963	3	16	glutathione peroxidase activity	MF	0.327058	MF glutathione peroxidase activity	Gohir.D12G230200.1, Gohir.A12G227900.1, Gohir.A12G227700.1
GO:0004674	0.0127656	0.993924	17	269	protein serine/threonine kinase activity	MF	0.373323	MF protein serine/threonine kinase activity	Gohir.D01G026300.2, Gohir.D02G076900.1, Gohir.D12G111400.1, Gohir.A03G162100.1, Gohir.D01G025700.2, Gohir.A05G387000.2, Gohir.D01G058000.1, Gohir.A10G015800.1, Gohir.D02G185400.2, Gohir.A03G162300.1, Gohir.D01G026100.1, Gohir.D01G058100.4, Gohir.A06G095300.1, Gohir.D06G008600.2, Gohir.D06G011100.1, Gohir.D01G079566.1, Gohir.A11G283001.1
GO:0016226	0.0127924	0.997961	4	32	iron-sulfur cluster assembly	BP	0.373323	BP iron-sulfur cluster assembly	Gohir.A10G120700.1, Gohir.A05G003800.3, Gohir.D10G145600.1, Gohir.D05G004200.1
GO:0043531	0.0128101	0.992189	35	679	ADP binding	MF	0.373323	MF ADP binding	Gohir.D11G299100.1, Gohir.D13G203300.1, Gohir.D11G295500.3, Gohir.A01G018380.1, Gohir.A01G064400.2, Gohir.A08G055500.2, Gohir.A01G018300.1, Gohir.D05G372900.1, Gohir.A13G197900.1, Gohir.D03G159250.1, Gohir.D10G236600.1, Gohir.D11G312054.1, Gohir.A10G230800.2, Gohir.D01G036600.1, Gohir.D02G008001.1, Gohir.A11G290100.1, Gohir.D11G335700.1, Gohir.D11G299400.1, Gohir.D10G211850.1, Gohir.D10G236700.1,…
GO:0009690	0.013231	0.997902	4	27	cytokinin metabolic process	BP	0.375828	BP cytokinin metabolic process	Gohir.A06G007700.1, Gohir.D07G011600.1, Gohir.D06G002600.1, Gohir.D05G040300.1
GO:0019139	0.013231	0.997902	4	27	cytokinin dehydrogenase activity	MF	0.375828	MF cytokinin dehydrogenase activity	Gohir.A06G007700.1, Gohir.D07G011600.1, Gohir.D06G002600.1, Gohir.D05G040300.1
GO:0004792	0.0140391	0.999395	2	6	thiosulfate sulfurtransferase activity	MF	0.393797	MF thiosulfate sulfurtransferase activity	Gohir.A12G058200.2, Gohir.D12G058100.1
GO:0016620	0.0143581	0.995435	8	93	oxidoreductase activity, acting on the aldehyde or oxo group of donors, NAD or NADP as acceptor	MF	0.397772	MF oxidoreductase activity, acting on the aldehyde or oxo group of donors, NAD or NADP as acceptor	Gohir.A04G091100.1, Gohir.A11G040800.1, Gohir.A10G069600.1, Gohir.A10G069600.1, Gohir.D07G226200.1, Gohir.D10G081900.1, Gohir.D10G081900.1, Gohir.A02G072700.1, Gohir.D11G039000.1, Gohir.D11G039000.1, Gohir.D02G079800.1
GO:0004869	0.0160281	0.998123	3	25	cysteine-type endopeptidase inhibitor activity	MF	0.438623	MF cysteine-type endopeptidase inhibitor activity	Gohir.A06G153800.1, Gohir.A02G016600.1, Gohir.D06G160600.1
GO:0030042	0.0170048	0.997009	4	39	actin filament depolymerization	BP	0.459745	BP actin filament depolymerization	Gohir.D12G258600.1, Gohir.D09G230900.1, Gohir.A03G204600.1, Gohir.D02G225900.1
GO:0048038	0.0189034	0.99658	4	37	quinone binding	MF	0.50499	MF quinone binding	Gohir.A02G031500.1, Gohir.D02G038200.1, Gohir.D08G192100.1, Gohir.A08G173400.1
GO:0009058	0.0196033	0.990437	16	276	biosynthetic process	BP	0.517527	BP biosynthetic process	Gohir.D01G184600.1, Gohir.D02G178100.1, Gohir.D02G178100.1, Gohir.D05G265900.1, Gohir.D05G265900.1, Gohir.D07G117900.1, Gohir.D02G178200.2, Gohir.A03G155100.1, Gohir.A03G155100.1, Gohir.A11G199633.1, Gohir.A11G199633.1, Gohir.A07G023400.1, Gohir.A07G023400.1, Gohir.D07G027000.1, Gohir.D07G027000.1, Gohir.D08G134700.1, Gohir.D08G134700.1, Gohir.D07G010300.1, Gohir.D07G010300.1, Gohir.D09G000301.1,…
GO:0009538	0.020219	0.997435	3	23	photosystem I reaction center	CC	0.527574	CC photosystem I reaction center	Gohir.1Z049558.1, Gohir.A02G031301.1, Gohir.D05G145900.1
GO:0019898	0.0207376	0.996135	4	38	extrinsic component of membrane	CC	0.534887	CC extrinsic component of membrane	Gohir.D11G276600.1, Gohir.A01G188600.1, Gohir.A11G266300.1, Gohir.D04G034900.2
GO:0003824	0.0224815	0.982881	92	2268	catalytic activity	MF	0.5684	MF catalytic activity	Gohir.D02G005800.1, Gohir.A05G110600.1, Gohir.D02G178100.1, Gohir.D02G178100.1, Gohir.A06G007700.1, Gohir.A06G007700.1, Gohir.A01G198000.1, Gohir.D08G220000.1, Gohir.D05G144800.1, Gohir.D10G110500.1, Gohir.D05G111200.1, Gohir.D13G201500.1, Gohir.D12G086300.1, Gohir.D05G265900.1, Gohir.D05G265900.1, Gohir.D07G055000.1, Gohir.D02G220800.2, Gohir.A03G172600.2, Gohir.D11G280600.1, Gohir.D07G011600.1,…
GO:1902358	0.0225435	0.998681	2	7	sulfate transmembrane transport	BP	0.5684	BP sulfate transmembrane transport	Gohir.A05G022200.1, Gohir.D05G023700.1
GO:0030247	0.0239582	0.989457	12	187	polysaccharide binding	MF	0.590962	MF polysaccharide binding	Gohir.D02G076900.1, Gohir.D02G185200.2, Gohir.A03G162100.1, Gohir.A05G239700.1, Gohir.A09G241900.3, Gohir.D02G185400.2, Gohir.D05G241066.1, Gohir.A03G162300.1, Gohir.A02G101000.1, Gohir.D09G242600.1, Gohir.D06G011100.1, Gohir.A09G049300.2
GO:0030001	0.023965	0.988309	15	297	metal ion transport	BP	0.590962	BP metal ion transport	Gohir.D06G162900.1, Gohir.A10G008100.1, Gohir.D08G228300.1, Gohir.A01G090400.1, Gohir.D03G130500.1, Gohir.A03G037900.1, Gohir.A07G076500.1, Gohir.A05G098400.1, Gohir.A02G132800.1, Gohir.D12G229400.1, Gohir.D06G217200.1, Gohir.D03G044200.1, Gohir.A06G204300.2, Gohir.A04G072100.1, Gohir.A12G253800.1
GO:0003978	0.0247961	0.996666	3	19	UDP-glucose 4-epimerase activity	MF	0.604809	MF UDP-glucose 4-epimerase activity	Gohir.A05G394400.1, Gohir.A09G190200.2, Gohir.A12G226000.1
GO:0005199	0.0274899	0.998144	2	8	structural constituent of cell wall	MF	0.663304	MF structural constituent of cell wall	Gohir.A13G146400.1, Gohir.D09G203900.1
GO:0010207	0.0281922	0.997977	2	10	photosystem II assembly	BP	0.673013	BP photosystem II assembly	Gohir.D11G194600.1, Gohir.A11G188100.1
GO:0004560	0.0289061	0.997995	2	8	alpha-L-fucosidase activity	MF	0.680309	MF alpha-L-fucosidase activity	Gohir.A12G263200.1, Gohir.D12G263700.1
GO:0005089	0.0291041	0.994029	4	34	Rho guanyl-nucleotide exchange factor activity	MF	0.680309	MF Rho guanyl-nucleotide exchange factor activity	Gohir.D04G125600.1, Gohir.A04G085900.1, Gohir.D05G131100.1, Gohir.D12G112000.1
GO:0008295	0.0321243	0.995176	3	21	spermidine biosynthetic process	BP	0.726608	BP spermidine biosynthetic process	Gohir.D05G008400.1, Gohir.D05G008400.1, Gohir.D02G220800.2, Gohir.A05G007500.1, Gohir.A05G007500.1
GO:0010082	0.0322145	0.999736	1	2	regulation of root meristem growth	BP	0.726608	BP regulation of root meristem growth	Gohir.D13G086100.1
GO:0009773	0.0326742	0.99729	2	16	photosynthetic electron transport in photosystem I	BP	0.726608	BP photosynthetic electron transport in photosystem I	Gohir.D09G228900.1, Gohir.A09G227900.1
GO:0046417	0.0327167	0.997507	2	9	chorismate metabolic process	BP	0.726608	BP chorismate metabolic process	Gohir.D05G061600.1, Gohir.A11G071200.1
GO:0006826	0.0330276	0.997418	2	10	iron ion transport	BP	0.726608	BP iron ion transport	Gohir.A09G167200.1, Gohir.D09G163100.1
GO:0006879	0.0330276	0.997418	2	10	cellular iron ion homeostasis	BP	0.726608	BP cellular iron ion homeostasis	Gohir.A09G167200.1, Gohir.A09G167200.1, Gohir.D09G163100.1, Gohir.D09G163100.1
GO:0004190	0.0375684	0.982319	12	202	aspartic-type endopeptidase activity	MF	0.818481	MF aspartic-type endopeptidase activity	Gohir.D12G231300.1, Gohir.D05G283300.1, Gohir.D04G149400.1, Gohir.D13G127050.1, Gohir.A04G003100.1, Gohir.A07G137300.2, Gohir.D09G132001.1, Gohir.A04G109464.1, Gohir.D02G085700.1, Gohir.D07G142600.1, Gohir.A09G135400.1, Gohir.A13G123200.1
GO:0006012	0.0392513	0.99108	4	39	galactose metabolic process	BP	0.846922	BP galactose metabolic process	Gohir.A05G394400.1, Gohir.A09G190200.2, Gohir.D01G023559.1, Gohir.A12G226000.1
GO:0004106	0.0405306	0.996456	2	10	chorismate mutase activity	MF	0.866196	MF chorismate mutase activity	Gohir.D05G061600.1, Gohir.A11G071200.1
GO:0051536	0.0454225	0.98187	8	139	iron-sulfur cluster binding	MF	0.961586	MF iron-sulfur cluster binding	Gohir.D13G034500.2, Gohir.A10G120700.1, Gohir.A05G003800.3, Gohir.D10G145600.1, Gohir.D09G218400.1, Gohir.D05G004200.1, Gohir.A09G104100.1, Gohir.A13G204100.1
GO:0030170	0.0473489	0.976147	13	230	pyridoxal phosphate binding	MF	0.969109	MF pyridoxal phosphate binding	Gohir.D02G005800.1, Gohir.D02G178100.1, Gohir.D02G178100.1, Gohir.D02G178100.1, Gohir.D05G265900.1, Gohir.D05G265900.1, Gohir.D02G178200.2, Gohir.D02G178200.2, Gohir.A03G155100.1, Gohir.A03G155100.1, Gohir.A03G155100.1, Gohir.A11G199633.1, Gohir.A11G199633.1, Gohir.A02G005300.1, Gohir.A07G023400.1, Gohir.A07G023400.1, Gohir.D07G027000.1, Gohir.D07G027000.1, Gohir.D08G134700.1, Gohir.D08G134700.1,…
GO:0003999	0.0477654	0.995293	2	12	adenine phosphoribosyltransferase activity	MF	0.969109	MF adenine phosphoribosyltransferase activity	Gohir.A05G122600.1, Gohir.D05G123500.1
GO:0006168	0.0477654	0.995293	2	12	adenine salvage	BP	0.969109	BP adenine salvage	Gohir.A05G122600.1, Gohir.D05G123500.1
GO:0005452	0.0480248	0.991447	3	24	inorganic anion exchanger activity	MF	0.969109	MF inorganic anion exchanger activity	Gohir.A12G122300.1, Gohir.A09G241800.1, Gohir.D12G126000.1
GO:0006820	0.0480248	0.991447	3	24	anion transport	BP	0.969109	BP anion transport	Gohir.A12G122300.1, Gohir.A12G122300.1, Gohir.A09G241800.1, Gohir.A09G241800.1, Gohir.D12G126000.1, Gohir.D12G126000.1
GO:0008199	0.0483691	0.9952	2	12	ferric iron binding	MF	0.969109	MF ferric iron binding	Gohir.A09G167200.1, Gohir.A09G167200.1, Gohir.D09G163100.1, Gohir.D09G163100.1
GO:0006694	0.0493749	0.991052	3	26	steroid biosynthetic process	BP	0.97618	BP steroid biosynthetic process	Gohir.D04G055400.1, Gohir.D05G185600.1, Gohir.A05G358700.1
GO:0015629	0.049592	0.987674	4	53	actin cytoskeleton	CC	0.97618	CC actin cytoskeleton	Gohir.D12G258600.1, Gohir.D09G230900.1, Gohir.A03G204600.1, Gohir.D02G225900.1
