# Supplementary material for: Transcriptomic profiles of non-embryogenic and embryogenic callus cells in a highly regenerative upland cotton line (Gossypium hirsutum L.)
Source: BMC Dev Biol. 2020 Dec 2;20:25. doi: 10.1186/s12861-020-00230-4 (PMC7713314; doi:10.1186/s12861-020-00230-4)
Supplement: Supplementary file 8 — Additional file 8. Subcluster 3 GO enrichment. Gene ontology enrichment of subcluster 3 as determined by k-means clustering [file 12861_2020_230_MOESM8_ESM.xlsx]

## Sheet: Sheet1
Table S8. Subcluster 3 GO enrichment
category	over_represented_pvalue	under_represented_pvalue	numDEInCat	numInCat	term	ontology	over_represented_FDR	go_term	gene_ids
GO:0005504	1.00613e-22	1	12	37	fatty acid binding	MF	1.12888e-19	MF fatty acid binding	Gohir.D01G071850.1, Gohir.D13G046900.1, Gohir.A10G139300.1, Gohir.A10G227700.1, Gohir.A10G225900.1, Gohir.D10G241800.1, Gohir.A10G139400.1, Gohir.A07G159300.1, Gohir.D10G127500.1, Gohir.D11G148700.1, Gohir.A01G085500.1, Gohir.D07G167100.1
GO:0009627	1.00613e-22	1	12	37	systemic acquired resistance	BP	1.12888e-19	BP systemic acquired resistance	Gohir.D01G071850.1, Gohir.D13G046900.1, Gohir.A10G139300.1, Gohir.A10G227700.1, Gohir.A10G225900.1, Gohir.D10G241800.1, Gohir.A10G139400.1, Gohir.A07G159300.1, Gohir.D10G127500.1, Gohir.D11G148700.1, Gohir.A01G085500.1, Gohir.D07G167100.1
GO:0015267	4.25739e-13	1	10	116	channel activity	MF	3.18452e-10	MF channel activity	Gohir.D01G203800.2, Gohir.D06G093500.1, Gohir.D04G113366.1, Gohir.A05G103200.1, Gohir.A10G205800.1, Gohir.D03G129900.1, Gohir.A05G098000.1, Gohir.D03G060200.1, Gohir.A13G229000.1, Gohir.D13G234600.1
GO:0055085	1.08203e-07	1	16	1651	transmembrane transport	BP	6.07018e-05	BP transmembrane transport	Gohir.D03G161700.1, Gohir.D01G203800.2, Gohir.D06G093500.1, Gohir.D04G113366.1, Gohir.A05G090400.1, Gohir.A05G103200.1, Gohir.A10G205800.1, Gohir.D12G003000.1, Gohir.D03G129900.1, Gohir.A05G199300.1, Gohir.A12G003300.1, Gohir.D06G066200.1, Gohir.A05G098000.1, Gohir.D03G060200.1, Gohir.A13G229000.1, Gohir.D13G234600.1
GO:0004190	4.69168e-06	1	6	202	aspartic-type endopeptidase activity	MF	0.00210563	MF aspartic-type endopeptidase activity	Gohir.D05G118300.1, Gohir.A02G078500.1, Gohir.A05G117400.1, Gohir.D05G223200.1, Gohir.A05G220400.1, Gohir.A05G061700.1
GO:0016020	1.17017e-05	0.999997	17	2570	membrane	CC	0.00437645	CC membrane	Gohir.D03G161700.1, Gohir.D03G161700.1, Gohir.D01G203800.2, Gohir.D06G093500.1, Gohir.A07G190800.1, Gohir.D04G113366.1, Gohir.A05G090400.1, Gohir.A05G090400.1, Gohir.A05G103200.1, Gohir.A10G205800.1, Gohir.D12G003000.1, Gohir.D03G129900.1, Gohir.A05G199300.1, Gohir.A12G003300.1, Gohir.D06G066200.1, Gohir.A05G098000.1, Gohir.D03G060200.1, Gohir.A13G229000.1, Gohir.D13G234600.1
GO:0005975	2.00039e-05	0.999997	11	1114	carbohydrate metabolic process	BP	0.00641268	BP carbohydrate metabolic process	Gohir.D09G116400.1, Gohir.D04G179000.1, Gohir.D02G161400.1, Gohir.A09G241700.1, Gohir.D09G242400.1, Gohir.D13G063700.1, Gohir.D03G138900.1, Gohir.A02G017600.1, Gohir.A04G135900.1, Gohir.D02G195100.1, Gohir.A12G254900.1, Gohir.A12G254900.1
GO:0004650	4.49438e-05	0.999997	5	172	polygalacturonase activity	MF	0.0126067	MF polygalacturonase activity	Gohir.D04G179000.1, Gohir.D02G161400.1, Gohir.A09G241700.1, Gohir.D09G242400.1, Gohir.A04G135900.1
GO:0006073	0.000702112	0.999972	3	70	cellular glucan metabolic process	BP	0.169611	BP cellular glucan metabolic process	Gohir.D13G063700.1, Gohir.D03G138900.1, Gohir.A02G017600.1
GO:0042546	0.000802873	0.999966	3	74	cell wall biogenesis	BP	0.169611	BP cell wall biogenesis	Gohir.D13G063700.1, Gohir.D03G138900.1, Gohir.A02G017600.1
GO:0016762	0.000863191	0.999963	3	75	xyloglucan:xyloglucosyl transferase activity	MF	0.169611	MF xyloglucan:xyloglucosyl transferase activity	Gohir.D13G063700.1, Gohir.D13G063700.1, Gohir.D03G138900.1, Gohir.D03G138900.1, Gohir.A02G017600.1, Gohir.A02G017600.1
GO:0010411	0.000907012	0.99996	3	77	xyloglucan metabolic process	BP	0.169611	BP xyloglucan metabolic process	Gohir.D13G063700.1, Gohir.D03G138900.1, Gohir.A02G017600.1
GO:0042744	0.00127593	0.999888	4	189	hydrogen peroxide catabolic process	BP	0.198611	BP hydrogen peroxide catabolic process	Gohir.D08G237300.1, Gohir.D09G146800.1, Gohir.A07G228900.1, Gohir.A10G102211.1
GO:0008271	0.00150449	0.999974	2	34	secondary active sulfate transmembrane transporter activity	MF	0.198611	MF secondary active sulfate transmembrane transporter activity	Gohir.D12G003000.1, Gohir.D12G003000.1, Gohir.A12G003300.1, Gohir.A12G003300.1
GO:0008272	0.00150449	0.999974	2	34	sulfate transport	BP	0.198611	BP sulfate transport	Gohir.D12G003000.1, Gohir.D12G003000.1, Gohir.D12G003000.1, Gohir.D12G003000.1, Gohir.A12G003300.1, Gohir.A12G003300.1, Gohir.A12G003300.1, Gohir.A12G003300.1
GO:0015116	0.00150449	0.999974	2	34	sulfate transmembrane transporter activity	MF	0.198611	MF sulfate transmembrane transporter activity	Gohir.D12G003000.1, Gohir.D12G003000.1, Gohir.A12G003300.1, Gohir.A12G003300.1
GO:0004553	0.00150463	0.999754	6	621	hydrolase activity, hydrolyzing O-glycosyl compounds	MF	0.198611	MF hydrolase activity, hydrolyzing O-glycosyl compounds	Gohir.D09G116400.1, Gohir.D13G063700.1, Gohir.D03G138900.1, Gohir.A02G017600.1, Gohir.D02G195100.1, Gohir.A12G254900.1
GO:0005618	0.00221873	0.999773	4	245	cell wall	CC	0.276602	CC cell wall	Gohir.D06G066300.1, Gohir.D13G063700.1, Gohir.D03G138900.1, Gohir.A02G017600.1
GO:0004601	0.0031092	0.999651	4	257	peroxidase activity	MF	0.367212	MF peroxidase activity	Gohir.D08G237300.1, Gohir.D08G237300.1, Gohir.D08G237300.1, Gohir.D09G146800.1, Gohir.D09G146800.1, Gohir.A07G228900.1, Gohir.A07G228900.1, Gohir.A10G102211.1, Gohir.A10G102211.1, Gohir.A10G102211.1
GO:0006857	0.00361209	0.9999	2	47	oligopeptide transport	BP	0.405277	BP oligopeptide transport	Gohir.D03G161700.1, Gohir.A05G090400.1
GO:0006979	0.00432688	0.999467	4	270	response to oxidative stress	BP	0.447286	BP response to oxidative stress	Gohir.D08G237300.1, Gohir.D09G146800.1, Gohir.A07G228900.1, Gohir.A10G102211.1
GO:0022900	0.00439247	0.999866	2	39	electron transport chain	BP	0.447286	BP electron transport chain	Gohir.D02G213900.1, Gohir.A03G192900.1
GO:0030286	0.00458448	0.999857	2	39	dynein complex	CC	0.447286	CC dynein complex	Gohir.D10G022100.2, Gohir.A10G021300.1
GO:0048046	0.00538248	0.999552	3	161	apoplast	CC	0.503262	CC apoplast	Gohir.D13G063700.1, Gohir.D03G138900.1, Gohir.A02G017600.1
GO:0005576	0.00984332	0.99898	3	176	extracellular region	CC	0.858503	CC extracellular region	Gohir.D02G019700.1, Gohir.A06G001600.1, Gohir.A05G184100.1
GO:0051537	0.0103088	0.999503	2	70	2 iron, 2 sulfur cluster binding	MF	0.858503	MF 2 iron, 2 sulfur cluster binding	Gohir.D02G213900.1, Gohir.D02G213900.1, Gohir.A03G192900.1, Gohir.A03G192900.1
GO:0009405	0.0103296	0.999957	1	5	pathogenesis	BP	0.858503	BP pathogenesis	Gohir.D02G019700.1
GO:0006508	0.0113968	0.997179	6	942	proteolysis	BP	0.913375	BP proteolysis	Gohir.D05G118300.1, Gohir.A02G078500.1, Gohir.A05G117400.1, Gohir.D05G223200.1, Gohir.A05G220400.1, Gohir.A05G061700.1
GO:0006596	0.0128742	0.999931	1	6	polyamine biosynthetic process	BP	0.996197	BP polyamine biosynthetic process	Gohir.A11G254700.1
GO:0009664	0.0149755	0.999121	2	78	plant-type cell wall organization	BP	1	BP plant-type cell wall organization	Gohir.A06G001600.1, Gohir.A05G184100.1
GO:0004623	0.0195788	0.999832	1	8	phospholipase A2 activity	MF	1	MF phospholipase A2 activity	Gohir.A05G001700.1, Gohir.A05G001700.1
GO:0050482	0.0195788	0.999832	1	8	arachidonic acid secretion	BP	1	BP arachidonic acid secretion	Gohir.A05G001700.1
GO:0008171	0.0204159	0.998585	2	91	O-methyltransferase activity	MF	1	MF O-methyltransferase activity	Gohir.D10G206000.1, Gohir.D10G206150.1
GO:0008515	0.0211594	0.999794	1	12	sucrose transmembrane transporter activity	MF	1	MF sucrose transmembrane transporter activity	Gohir.D02G066400.1
GO:0015770	0.0211594	0.999794	1	12	sucrose transport	BP	1	BP sucrose transport	Gohir.D02G066400.1
GO:0008146	0.0214158	0.998477	2	92	sulfotransferase activity	MF	1	MF sulfotransferase activity	Gohir.D05G373000.1, Gohir.A01G213800.1
GO:0016746	0.0223426	0.998372	2	107	transferase activity, transferring acyl groups	MF	1	MF transferase activity, transferring acyl groups	Gohir.D09G000401.1, Gohir.A09G000148.1
GO:0009507	0.0245465	0.99812	2	105	chloroplast	CC	1	CC chloroplast	Gohir.D12G003000.1, Gohir.A12G003300.1
GO:0008553	0.0297194	0.999572	1	29	proton-exporting ATPase activity, phosphorylative mechanism	MF	1	MF proton-exporting ATPase activity, phosphorylative mechanism	Gohir.A05G004000.1
GO:0120029	0.0297194	0.999572	1	29	proton export across plasma membrane	BP	1	BP proton export across plasma membrane	Gohir.A05G004000.1
GO:0006644	0.0307305	0.999562	1	13	phospholipid metabolic process	BP	1	BP phospholipid metabolic process	Gohir.A05G001700.1
GO:0007017	0.0333172	0.99699	2	122	microtubule-based process	BP	1	BP microtubule-based process	Gohir.D10G022100.2, Gohir.A10G021300.1
GO:0006869	0.0351333	0.996737	2	113	lipid transport	BP	1	BP lipid transport	Gohir.A05G000700.1, Gohir.D05G001000.1
GO:0005887	0.0366601	0.999357	1	20	integral component of plasma membrane	CC	1	CC integral component of plasma membrane	Gohir.D02G066400.1
GO:0051536	0.0375766	0.996373	2	139	iron-sulfur cluster binding	MF	1	MF iron-sulfur cluster binding	Gohir.D02G213900.1, Gohir.A03G192900.1
GO:0020037	0.0432673	0.985549	6	1133	heme binding	MF	1	MF heme binding	Gohir.D08G237300.1, Gohir.D01G074500.1, Gohir.D09G146800.1, Gohir.D08G025500.1, Gohir.A07G228900.1, Gohir.A10G102211.1
GO:0016717	0.0458125	0.99899	1	21	oxidoreductase activity, acting on paired donors, with oxidation of a pair of donors resulting in the reduction of molecular oxygen to two molecules of water	MF	1	MF oxidoreductase activity, acting on paired donors, with oxidation of a pair of donors resulting in the reduction of molecular oxygen to two molecules of water	Gohir.A01G137630.1
GO:0016042	0.0473605	0.998914	1	24	lipid catabolic process	BP	1	BP lipid catabolic process	Gohir.A05G001700.1
