# Supplementary material for: Transcriptomic profiles of non-embryogenic and embryogenic callus cells in a highly regenerative upland cotton line (Gossypium hirsutum L.)
Source: BMC Dev Biol. 2020 Dec 2;20:25. doi: 10.1186/s12861-020-00230-4 (PMC7713314; doi:10.1186/s12861-020-00230-4)
Supplement: Supplementary file 11 — Additional file 11. Genes involved in DNA methylation regulation in NEC and EC callus. A list of all annotated genes involved in methylation regulation in the v2.0 of Gossypium hirsutum reference assembly with logFC values in EC. Functional annotation from domain scan and Arabidopsis thaliana definition lines from the best hit. [file 12861_2020_230_MOESM11_ESM.xlsx]

## Sheet: Sheet1
Table S11. Genes involved in DNA methylation regulation in NEC and EC callus.
GeneID	log(FC)	PFAM	KOG	EC	SIGNALP	KO	Athaliana_BestHit	Athaliana_Defline	PANTHER
Gohir.D12G023400	-7.3931212902329	PF01596		2.1.1.104			AT4G34050	caffeoyl-CoA O-methyltransferase, putative, expressed; S-adenosyl-L-methionine-dependent methyltransferases superfamily protein	PTHR10509,PTHR10509:SF50
Gohir.D12G246900	-5.53026353955559	PF00891,PF08100	KOG3178	2.1.1.68		K13066	AT5G54160	O-methyltransferase, putative, expressed; O-methyltransferase 1	PTHR11746:SF114,PTHR11746
Gohir.A11G230200	-5.51970263660868	PF04043			SignalP-noTM		AT5G64620	invertase/pectin methylesterase inhibitor family protein, putative, expressed; cell wall / vacuolar inhibitor of fructosidase 2	PTHR31080:SF62,PTHR31080
Gohir.A04G139200	-5.2672064556048	PF01596	KOG1663	2.1.1.267		K00588	AT1G67980	caffeoyl-CoA O-methyltransferase, putative, expressed; caffeoyl-CoA 3-O-methyltransferase	PTHR10509:SF20,PTHR10509
Gohir.A12G246200	-5.21573605570348	PF08100,PF00891	KOG3178	2.1.1.68		K13066	AT5G54160	O-methyltransferase, putative, expressed; O-methyltransferase 1	PTHR11746,PTHR11746:SF114
Gohir.D11G084500	-5.20962299883861	PF04043,PF01095		3.1.1.11	SignalP-noTM	K01051	AT2G45220	pectinesterase, putative, expressed; Plant invertase/pectin methylesterase inhibitor superfamily	PTHR31707,PTHR31707:SF11
Gohir.A08G105100	-5.18286627774194	PF08100,PF00891	KOG3178	2.1.1.68		K13066	AT5G54160	O-methyltransferase, putative, expressed; O-methyltransferase 1	PTHR11746,PTHR11746:SF114
Gohir.D04G182200	-5.03466749909562	PF01596	KOG1663	2.1.1.267			AT1G67980	caffeoyl-CoA O-methyltransferase, putative, expressed; caffeoyl-CoA 3-O-methyltransferase	PTHR10509:SF20,PTHR10509
Gohir.D09G109200	-5.01123784238261	PF08100,PF00891	KOG3178	2.1.1.68		K13066	AT5G54160	O-methyltransferase, putative, expressed; O-methyltransferase 1	PTHR11746,PTHR11746:SF114
Gohir.A05G353800	-4.9486715069957	PF08241	KOG1269	2.1.1.41			AT3G01660	methyltransferase domain containing protein, expressed; S-adenosyl-L-methionine-dependent methyltransferases superfamily protein	PTHR43036,PTHR43036:SF2
Gohir.A10G191400	-4.65312862544836	PF00891	KOG3178	2.1.1.68			AT5G54160	O-methyltransferase, putative, expressed; O-methyltransferase 1	PTHR11746,PTHR11746:SF114
Gohir.A03G119200	-4.49668781945592	PF01095,PF04043		3.1.1.11	SignalP-noTM	K01051	AT1G23200	pectinesterase, putative, expressed; Plant invertase/pectin methylesterase inhibitor superfamily	PTHR31707:SF27,PTHR31707
Gohir.A02G031500	-4.48217615964513	PF02728,PF01179,PF02727	KOG1186	1.4.3.21	SignalP-noTM	K00276	AT1G31710	copper methylamine oxidase precursor, putative, expressed; Copper amine oxidase family protein	PTHR10638:SF58,PTHR10638
Gohir.A01G145318	-4.31718162034207	PF04043		3.1.1.11	SignalP-noTM		AT1G14890	invertase/pectin methylesterase inhibitor family protein, putative, expressed; Plant invertase/pectin methylesterase inhibitor superfamily protein	PTHR31080:SF10,PTHR31080
Gohir.A10G117300	-4.15965917732847	PF08241	KOG1540	2.1.1.295			AT3G63410	methyltransferase domain containing protein, putative, expressed; S-adenosyl-L-methionine-dependent methyltransferases superfamily protein	PTHR44516,PTHR44516:SF3
Gohir.D01G142600	-3.93860771292759	PF04043		3.1.1.11	SignalP-noTM		AT1G14890	invertase/pectin methylesterase inhibitor family protein, putative, expressed; Plant invertase/pectin methylesterase inhibitor superfamily protein	PTHR31080,PTHR31080:SF10
Gohir.A11G045400	-3.89418570516141	PF12697	KOG1454				AT3G50440	OsPOP4 - Putative Prolyl Oligopeptidase homologue, expressed; methyl esterase 10	PTHR10992:SF943,PTHR10992
Gohir.A05G266700	-3.77249888393886	PF03141		2.1.1.157			AT1G78240	dehydration response related protein, putative, expressed; S-adenosyl-L-methionine-dependent methyltransferases superfamily protein	PTHR10108,PTHR10108:SF899
Gohir.D06G081600	-3.7535425803105	PF04043,PF01095		3.1.1.11	SignalP-noTM		AT2G26440	pectinesterase, putative, expressed; Plant invertase/pectin methylesterase inhibitor superfamily	PTHR31707,PTHR31707:SF39
Gohir.A03G158000	-3.7150686571721	PF08100,PF00891	KOG3178				AT5G54160	O-methyltransferase, putative, expressed; O-methyltransferase 1	PTHR11746:SF111,PTHR11746
Gohir.A13G041700	-3.70495894918276	PF01596	KOG1663	2.1.1.104		K00588	AT4G34050	caffeoyl-CoA O-methyltransferase, putative, expressed; S-adenosyl-L-methionine-dependent methyltransferases superfamily protein	PTHR10509,PTHR10509:SF50
Gohir.A07G125900	-3.53676529702691	PF01095,PF04043		3.1.1.11			AT4G02320	pectinesterase, putative, expressed; Plant invertase/pectin methylesterase inhibitor superfamily	PTHR31707:SF25,PTHR31707
Gohir.D04G182050	-3.52054478694204	PF01596	KOG1663	2.1.1.267			AT1G67980	caffeoyl-CoA O-methyltransferase, putative, expressed; caffeoyl-CoA 3-O-methyltransferase	PTHR10509,PTHR10509:SF20
Gohir.D13G162300	-3.49259257774267	PF08241	KOG1269	2.1.1.95		K05928	AT1G64970	Cyclopropane-fatty-acyl-phospholipid synthase, putative, expressed; gamma-tocopherol methyltransferase	PTHR43591,PTHR43591:SF25
Gohir.A13G157500	-3.48891058748239	PF08241	KOG1269	2.1.1.95			AT1G64970	Cyclopropane-fatty-acyl-phospholipid synthase, putative, expressed; gamma-tocopherol methyltransferase	PTHR43591:SF25,PTHR43591
Gohir.A06G071900	-3.43138550111964	PF08241					AT4G29590	methyltransferase domain containing protein, expressed; S-adenosyl-L-methionine-dependent methyltransferases superfamily protein	PTHR43036,PTHR43036:SF1
Gohir.A04G132400	-3.40409920050333	PF08100,PF00891	KOG3178				AT4G35160	O-methyltransferase, putative, expressed; O-methyltransferase family protein	PTHR11746:SF98,PTHR11746
Gohir.D02G142600	-3.2995620082591	PF04043,PF01095		3.1.1.11	SignalP-noTM	K01051	AT1G23200	pectinesterase, putative, expressed; Plant invertase/pectin methylesterase inhibitor superfamily	PTHR31707:SF27,PTHR31707
Gohir.D11G048900	-3.27503252177705	PF12697	KOG1454				AT3G50440	OsPOP4 - Putative Prolyl Oligopeptidase homologue, expressed; methyl esterase 10	PTHR10992:SF943,PTHR10992
Gohir.D13G040400	-3.17953321778067	PF01596	KOG1663	2.1.1.104		K00588	AT4G34050	caffeoyl-CoA O-methyltransferase, putative, expressed; S-adenosyl-L-methionine-dependent methyltransferases superfamily protein	PTHR10509,PTHR10509:SF50
Gohir.A10G191200	-3.14579799044262	PF08100,PF00891	KOG3178	2.1.1.68		K13066	AT5G54160	O-methyltransferase, putative, expressed; O-methyltransferase 1	PTHR11746,PTHR11746:SF114
Gohir.A11G079800	-3.11781069884091	PF01095,PF04043		3.1.1.11	SignalP-noTM	K01051	AT2G45220	pectinesterase, putative, expressed; Plant invertase/pectin methylesterase inhibitor superfamily	PTHR31707,PTHR31707:SF11
Gohir.D05G268300	-3.11394712501721	PF03141		2.1.1.157			AT1G78240	dehydration response related protein, putative, expressed; S-adenosyl-L-methionine-dependent methyltransferases superfamily protein	PTHR10108:SF899,PTHR10108
Gohir.D05G360400	-3.07453787731371	PF08241					AT5G54400	S-adenosyl-L-methionine-dependent methyltransferases superfamily protein	PTHR45277
Gohir.D12G062900	-3.05081235965586	PF03492		2.1.1.274		K08241	AT1G19640	SAM dependent carboxyl methyltransferase, putative, expressed; jasmonic acid carboxyl methyltransferase	PTHR31009:SF6,PTHR31009
Gohir.D11G014900	-3.04329704068667	PF01095		3.1.1.11			AT3G49220	pectinesterase, putative, expressed; Plant invertase/pectin methylesterase inhibitor superfamily	PTHR31707:SF8,PTHR31707
Gohir.D10G199000	-2.99461173992014	PF00891,PF08100	KOG3178	2.1.1.68		K13066	AT5G54160	O-methyltransferase, putative, expressed; O-methyltransferase 1	PTHR11746:SF114,PTHR11746
Gohir.D07G149900	-2.95401341208812	PF03141					AT4G00750	dehydration response related protein, putative, expressed; S-adenosyl-L-methionine-dependent methyltransferases superfamily protein	PTHR10108,PTHR10108:SF1059
Gohir.D09G189400	-2.93030209300036	PF04043		3.1.1.11	SignalP-noTM		AT5G62350	invertase/pectin methylesterase inhibitor family protein, putative, expressed; Plant invertase/pectin methylesterase inhibitor superfamily protein	PTHR31080,PTHR31080:SF19
Gohir.D06G070400	-2.89238332454599	PF08241					AT4G29590	methyltransferase domain containing protein, expressed; S-adenosyl-L-methionine-dependent methyltransferases superfamily protein	PTHR43036:SF1,PTHR43036
Gohir.A03G057800	-2.85557561888181	PF04043		3.1.1.11	SignalP-noTM		AT5G62360	invertase/pectin methylesterase inhibitor family protein, putative, expressed; Plant invertase/pectin methylesterase inhibitor superfamily protein	PTHR31080:SF19,PTHR31080
Gohir.A12G129000	-2.8277610464406	PF04043,PF01095		3.1.1.11	SignalP-noTM	K01051	AT1G02810	pectinesterase, putative, expressed; Plant invertase/pectin methylesterase inhibitor superfamily	PTHR31707:SF33,PTHR31707
Gohir.D07G103000	-2.81878895981695	PF01429					AT5G59380	methyl-CPG-binding domain 6	PTHR12396:SF11,PTHR12396
Gohir.D12G023500	-2.81532043664979	PF01596	KOG1663	2.1.1.104			AT4G34050	caffeoyl-CoA O-methyltransferase, putative, expressed; S-adenosyl-L-methionine-dependent methyltransferases superfamily protein	PTHR10509:SF50,PTHR10509
Gohir.A03G119300	-2.80710089493869	PF04043		3.1.1.11	SignalP-noTM		AT1G14890	invertase/pectin methylesterase inhibitor family protein, putative, expressed; Plant invertase/pectin methylesterase inhibitor superfamily protein	PTHR31080,PTHR31080:SF10
Gohir.D11G230300	-2.78692937535664	PF04043			SignalP-noTM		AT5G64620	invertase/pectin methylesterase inhibitor family protein, putative, expressed; cell wall / vacuolar inhibitor of fructosidase 2	PTHR31080,PTHR31080:SF62
Gohir.A05G267400	-2.58625615397252	PF08241		2.1.1.163			AT1G78140	methyltransferase, putative, expressed; S-adenosyl-L-methionine-dependent methyltransferases superfamily protein	PTHR43591:SF19,PTHR43591
Gohir.D10G149800	-2.58182252429973	PF08241	KOG1540	2.1.1.295		K12502	AT3G63410	methyltransferase domain containing protein, putative, expressed; S-adenosyl-L-methionine-dependent methyltransferases superfamily protein	PTHR44516,PTHR44516:SF3
Gohir.D03G055300	-2.57263435667298	PF08241	KOG1269	2.1.1.95		K05928	AT1G64970	Cyclopropane-fatty-acyl-phospholipid synthase, putative, expressed; gamma-tocopherol methyltransferase	PTHR43591,PTHR43591:SF25
Gohir.A03G188300	-2.49010133283071	PF01596	KOG1663	2.1.1.104			AT4G34050	caffeoyl-CoA O-methyltransferase, putative, expressed; S-adenosyl-L-methionine-dependent methyltransferases superfamily protein	PTHR10509,PTHR10509:SF50
Gohir.A06G070800	-2.45829853193729	PF01596	KOG1663	2.1.1.104		K00588	AT4G26220	caffeoyl-CoA O-methyltransferase, putative, expressed; S-adenosyl-L-methionine-dependent methyltransferases superfamily protein	PTHR10509,PTHR10509:SF29
Gohir.D11G049000	-2.42871642739908	PF12697	KOG1454				AT3G50440	OsPOP4 - Putative Prolyl Oligopeptidase homologue, expressed; methyl esterase 10	PTHR10992,PTHR10992:SF943
Gohir.A12G063100	-2.39946365286877	PF03492		2.1.1.274		K08241	AT1G19640	SAM dependent carboxyl methyltransferase, putative, expressed; jasmonic acid carboxyl methyltransferase	PTHR31009:SF6,PTHR31009
Gohir.A05G182600	-2.3892078663074	PF08241,PF08498	KOG1269	2.1.1.143		K08242	AT1G20330	C-methyltransferase, putative, expressed; sterol methyltransferase 2	PTHR44742:SF1,PTHR44742
Gohir.A02G114300	-2.38763197570233	PF08241	KOG1269	2.1.1.95		K05928	AT1G64970	Cyclopropane-fatty-acyl-phospholipid synthase, putative, expressed; gamma-tocopherol methyltransferase	PTHR43591,PTHR43591:SF25
Gohir.A11G014800	-2.32573577262485	PF01095,PF04043		3.1.1.11			AT3G49220	pectinesterase, putative, expressed; Plant invertase/pectin methylesterase inhibitor superfamily	PTHR31707:SF8,PTHR31707
Gohir.D08G116900	-2.23790838974945	PF08100,PF00891	KOG3178	2.1.1.68		K13066	AT5G54160	O-methyltransferase, putative, expressed; O-methyltransferase 1	PTHR11746,PTHR11746:SF114
Gohir.D02G038200	-2.19879241084493	PF01179,PF02727,PF02728	KOG1186	1.4.3.21	SignalP-noTM	K00276	AT1G31710	copper methylamine oxidase precursor, putative, expressed; Copper amine oxidase family protein	PTHR10638,PTHR10638:SF58
Gohir.A05G141600	-2.18121173115904	PF04043,PF01095		3.1.1.11			AT1G53840	pectinesterase, putative, expressed; pectin methylesterase 1	PTHR31707,PTHR31707:SF42
Gohir.D05G185600	-2.1795233544629	PF08241,PF08498	KOG1269	2.1.1.143		K08242	AT1G20330	C-methyltransferase, putative, expressed; sterol methyltransferase 2	PTHR44742,PTHR44742:SF1
Gohir.A06G146000	-2.15022570198134	PF04043,PF01095		3.1.1.11			AT1G11580	pectinesterase, putative, expressed; methylesterase PCR A	PTHR31707:SF32,PTHR31707
Gohir.A12G220300	-2.14855508943904	PF04043		3.1.1.11	SignalP-noTM		AT4G12390	invertase/pectin methylesterase inhibitor family protein, putative, expressed; pectin methylesterase inhibitor 1	PTHR31080:SF30,PTHR31080
Gohir.A12G242100	-2.1303426242536	PF08100,PF00891	KOG3178	2.1.1.68		K13066	AT5G54160	O-methyltransferase, putative, expressed; O-methyltransferase 1	PTHR11746,PTHR11746:SF81
Gohir.A06G084500	-2.11673252404601	PF04043,PF01095		3.1.1.11	SignalP-noTM		AT2G26440	pectinesterase, putative, expressed; Plant invertase/pectin methylesterase inhibitor superfamily	PTHR31707,PTHR31707:SF39
Gohir.A12G022900	-2.10629129828086	PF01596	KOG1663	2.1.1.104		K00588	AT4G34050	caffeoyl-CoA O-methyltransferase, putative, expressed; S-adenosyl-L-methionine-dependent methyltransferases superfamily protein	PTHR10509:SF50,PTHR10509
Gohir.A03G057500	-2.07283650451707	PF04043		3.1.1.11	SignalP-noTM		AT5G62350	invertase/pectin methylesterase inhibitor family protein, putative, expressed; Plant invertase/pectin methylesterase inhibitor superfamily protein	PTHR31080:SF31,PTHR31080
Gohir.D05G174600	-2.04068046154666	PF08669,PF01571	KOG2770	2.1.2.10		K00605	AT1G11860	aminomethyltransferase, putative, expressed; Glycine cleavage T-protein family	PTHR43757,PTHR43757:SF2
Gohir.D02G142700	-2.03400482230037	PF04043		3.1.1.11	SignalP-noTM		AT1G14890	invertase/pectin methylesterase inhibitor family protein, putative, expressed; Plant invertase/pectin methylesterase inhibitor superfamily protein	PTHR31080:SF10,PTHR31080
Gohir.A12G144700	-1.9893647164106	PF01179,PF02727,PF02728	KOG1186	1.4.3.21		K00276	AT2G42490	copper methylamine oxidase precursor, putative, expressed; Copper amine oxidase family protein	PTHR10638,PTHR10638:SF18
Gohir.D02G122100	-1.94369980118913	PF08241,PF13489	KOG1269	2.1.1.103		K05929	AT3G18000	CPuORF25 - conserved peptide uORF-containing transcript, expressed; S-adenosyl-L-methionine-dependent methyltransferases superfamily protein	PTHR44307,PTHR44307:SF1
Gohir.D10G106300	-1.93497541451303	PF01095,PF04043		3.1.1.11			AT5G09760	pectinesterase, putative, expressed; Plant invertase/pectin methylesterase inhibitor superfamily	PTHR31707,PTHR31707:SF82
Gohir.D10G198900	-1.92659736788713	PF00891,PF08100	KOG3178	2.1.1.68		K13066	AT5G54160	O-methyltransferase, putative, expressed; O-methyltransferase 1	PTHR11746:SF114,PTHR11746
Gohir.D10G138600	-1.87206679011941	PF00464	KOG2467	2.1.2.1		K00600	AT4G13930	serine hydroxymethyltransferase, mitochondrial precursor, putative, expressed; serine hydroxymethyltransferase 4	PTHR11680,PTHR11680:SF11
Gohir.A04G120300	-1.83620074586766	PF01596	KOG1663	2.1.1.104		K00588	AT4G34050	caffeoyl-CoA O-methyltransferase, putative, expressed; S-adenosyl-L-methionine-dependent methyltransferases superfamily protein	PTHR10509:SF50,PTHR10509
Gohir.A04G027700	-1.82976127327478	PF08241					AT5G54400	S-adenosyl-L-methionine-dependent methyltransferases superfamily protein	PTHR45277
Gohir.A05G109600	-1.80063129606622			2.1.1.12			AT5G49810	methionine S-methyltransferase, putative, expressed; methionine S-methyltransferase	PTHR11751:SF133,PTHR11751
Gohir.A13G164600	-1.79254880008262	PF08267,PF01717	KOG2263	2.1.1.14		K00549	AT5G17920	5-methyltetrahydropteroyltriglutamate--homocysteine methyltransferase, putative, expressed; Cobalamin-independent synthase family protein	PTHR30519:SF11,PTHR30519
Gohir.D11G310500	-1.78104175987048				SignalP-noTM		AT5G18150	expressed protein; Methyltransferase-related protein	PTHR34132,PTHR34132:SF1
Gohir.D04G161800	-1.75640031925308	PF01596	KOG1663	2.1.1.104		K00588	AT4G34050	caffeoyl-CoA O-methyltransferase, putative, expressed; S-adenosyl-L-methionine-dependent methyltransferases superfamily protein	PTHR10509,PTHR10509:SF50
Gohir.D08G236080	-1.75422168886969	PF00891,PF08100	KOG3178	2.1.1.68			AT5G54160	O-methyltransferase, putative, expressed; O-methyltransferase 1	PTHR11746:SF114,PTHR11746
Gohir.D12G223800	-1.75418506194064	PF04116	KOG0873	1.14.13.72		K14423	AT4G12110	fatty acid hydroxylase, putative, expressed; sterol-4alpha-methyl oxidase 1-1	PTHR11863:SF67,PTHR11863
Gohir.A12G242200	-1.73204780454592	PF08100,PF00891	KOG3178	2.1.1.68		K13066	AT5G54160	O-methyltransferase, putative, expressed; O-methyltransferase 1	PTHR11746,PTHR11746:SF81
Gohir.A05G109500	-1.70611319419868	PF05175		2.1.1.12			AT5G49810	methionine S-methyltransferase, putative, expressed; methionine S-methyltransferase	PTHR11751,PTHR11751:SF133
Gohir.A02G033600	-1.69060774871416	PF02574	KOG1579	2.1.1.10		K00547	AT3G22740	homocysteine S-methyltransferase protein, putative, expressed; homocysteine S-methyltransferase 3	PTHR21091:SF159,PTHR21091
Gohir.D12G149300	-1.68362340950292	PF01179,PF02727,PF02728	KOG1186	1.4.3.21		K00276	AT2G42490	copper methylamine oxidase precursor, putative, expressed; Copper amine oxidase family protein	PTHR10638,PTHR10638:SF18
Gohir.D08G059301	-1.64473915504341	PF00856,PF09273		2.1.1.43			AT3G07670	SET domain-containing protein, putative, expressed; Rubisco methyltransferase family protein	PTHR13271,PTHR13271:SF81
Gohir.D13G167400	-1.57863949707829	PF08267,PF01717	KOG2263	2.1.1.14		K00549	AT5G17920	5-methyltetrahydropteroyltriglutamate--homocysteine methyltransferase, putative, expressed; Cobalamin-independent synthase family protein	PTHR30519,PTHR30519:SF11
Gohir.A06G035200	-1.57685464164591	PF03141		2.1.1.157			AT1G78240	dehydration response related protein, putative, expressed; S-adenosyl-L-methionine-dependent methyltransferases superfamily protein	PTHR10108,PTHR10108:SF899
Gohir.A11G045500	-1.57099547504428	PF12697	KOG1454				AT3G50440	OsPOP4 - Putative Prolyl Oligopeptidase homologue, expressed; methyl esterase 10	PTHR10992,PTHR10992:SF943
Gohir.D01G013500	-1.5576061516448	PF01170	KOG2671	2.1.1.214		K15430	AT3G26410	RNA methyltransferase protein, putative, expressed; methyltransferases;nucleic acid binding	PTHR13370:SF3,PTHR13370
Gohir.A05G095600	-1.54841649824055	PF01429					AT3G46580	methyl-CPG-binding domain protein 5	PTHR12396:SF11,PTHR12396
Gohir.A05G037100	-1.49495189540669	PF04043,PF01095		3.1.1.11		K01051	AT1G53830	pectinesterase, putative, expressed; pectin methylesterase 2	PTHR31707:SF55,PTHR31707
Gohir.A09G206500	-1.49447349566192	PF00464	KOG2467	2.1.2.1		K00600	AT4G13930	serine hydroxymethyltransferase, mitochondrial precursor, putative, expressed; serine hydroxymethyltransferase 4	PTHR11680:SF11,PTHR11680
Gohir.A12G202900	-1.48412063976314	PF03141		2.1.1.41			AT4G19120	methyltransferase, putative, expressed; S-adenosyl-L-methionine-dependent methyltransferases superfamily protein	PTHR10108,PTHR10108:SF984
Gohir.D05G013400	-1.47631269545078	PF08241		2.1.1.163			AT2G41040	methyltransferase domain containing protein, putative, expressed; S-adenosyl-L-methionine-dependent methyltransferases superfamily protein	PTHR43591:SF19,PTHR43591
Gohir.D10G138300	-1.44589285738257	PF02219	KOG0564	1.5.1.20		K00297	AT2G44160	methylenetetrahydrofolate reductase, putative, expressed; methylenetetrahydrofolate reductase 2	PTHR21091:SF31,PTHR21091
Gohir.D05G109900	-1.44427434935118	PF05175,PF00155	KOG0634	2.1.1.12		K08247	AT5G49810	methionine S-methyltransferase, putative, expressed; methionine S-methyltransferase	PTHR11751:SF133,PTHR11751
Gohir.A10G127300	-1.43978280953557	PF00464	KOG2467	2.1.2.1		K00600	AT4G13930	serine hydroxymethyltransferase, mitochondrial precursor, putative, expressed; serine hydroxymethyltransferase 4	PTHR11680:SF11,PTHR11680
Gohir.A10G084907	-1.42530080908421	PF04043					AT5G64620	invertase/pectin methylesterase inhibitor family protein, putative, expressed; cell wall / vacuolar inhibitor of fructosidase 2	PTHR31080,PTHR31080:SF62
Gohir.A05G040200	-1.39982271431899	PF02353					AT4G33110	Cyclopropane-fatty-acyl-phospholipid synthase, putative, expressed; S-adenosyl-L-methionine-dependent methyltransferases superfamily protein	PTHR43832
Gohir.A06G161900	-1.39610744599396	PF03141					AT2G40280	methyltransferase, putative, expressed; S-adenosyl-L-methionine-dependent methyltransferases superfamily protein	PTHR10108,PTHR10108:SF887
Gohir.D01G023565	-1.38321756598877	PF04043			SignalP-noTM		AT3G17130	invertase/pectin methylesterase inhibitor family protein, putative, expressed; Plant invertase/pectin methylesterase inhibitor superfamily protein	PTHR31080,PTHR31080:SF23
Gohir.D13G074300	-1.38176523013836	PF03141					AT1G26850	methyltransferase, putative, expressed; S-adenosyl-L-methionine-dependent methyltransferases superfamily protein	PTHR10108,PTHR10108:SF1061
Gohir.D06G069400	-1.36891953884609	PF01596	KOG1663				AT4G26220	caffeoyl-CoA O-methyltransferase, putative, expressed; S-adenosyl-L-methionine-dependent methyltransferases superfamily protein	PTHR10509:SF29,PTHR10509
Gohir.D11G314900	-1.36827170452578	PF01717,PF08267	KOG2263	2.1.1.14		K00549	AT5G17920	5-methyltetrahydropteroyltriglutamate--homocysteine methyltransferase, putative, expressed; Cobalamin-independent synthase family protein	PTHR30519:SF11,PTHR30519
Gohir.D02G076800	-1.36460396161532	PF03141					AT1G29470	methyltransferase, putative, expressed; S-adenosyl-L-methionine-dependent methyltransferases superfamily protein	PTHR10108,PTHR10108:SF1056
Gohir.A10G110900	-1.31694417234754	PF03141		2.1.1.103			AT1G04430	methyltransferase, putative, expressed; S-adenosyl-L-methionine-dependent methyltransferases superfamily protein	PTHR10108:SF704,PTHR10108
Gohir.D02G169700	-1.31670061728041	PF02574	KOG1579	2.1.1.10		K00547	AT3G25900	homocysteine S-methyltransferase protein, putative, expressed; Homocysteine S-methyltransferase family protein	PTHR21091,PTHR21091:SF140
Gohir.A05G040250	-1.30775434567855						AT4G33110	Cyclopropane-fatty-acyl-phospholipid synthase, putative, expressed; S-adenosyl-L-methionine-dependent methyltransferases superfamily protein	PTHR43832
Gohir.D08G191600	-1.30353700653681	PF04043		3.1.1.11	SignalP-noTM		AT5G62350	invertase/pectin methylesterase inhibitor family protein, putative, expressed; Plant invertase/pectin methylesterase inhibitor superfamily protein	PTHR31080:SF19,PTHR31080
Gohir.D13G046600	-1.30002428583123	PF02401		1.17.1.2		K03527	AT4G34350	4-hydroxy-3-methylbut-2-enyl diphosphate reductase, putative, expressed; 4-hydroxy-3-methylbut-2-enyl diphosphate reductase	PTHR31619:SF2,PTHR31619
Gohir.D05G143900	-1.29772240581216	PF04043,PF01095		3.1.1.11			AT1G53840	pectinesterase, putative, expressed; pectin methylesterase 1	PTHR31707:SF42,PTHR31707
Gohir.A02G039600	-1.28799110058213	PF03141		2.1.1.103			AT1G04430	methyltransferase, putative, expressed; S-adenosyl-L-methionine-dependent methyltransferases superfamily protein	PTHR10108,PTHR10108:SF704
Gohir.D01G071300	-1.28667109203198	PF03492		2.1.1.278		K18848	AT5G55250	jasmonate O-methyltransferase, putative, expressed; IAA carboxylmethyltransferase 1	PTHR31009,PTHR31009:SF5
Gohir.A05G239900	-1.27577980234752	PF03141					AT2G34300	methyltransferase, putative, expressed; S-adenosyl-L-methionine-dependent methyltransferases superfamily protein	PTHR10108:SF1056,PTHR10108
Gohir.D12G250800	-1.26763741558663	PF04043,PF01095		3.1.1.11			AT5G53370	pectinesterase, putative, expressed; pectin methylesterase PCR fragment F	PTHR31707:SF8,PTHR31707
Gohir.D01G150800	-1.26434268093821	PF02727,PF01179,PF02728	KOG1186	1.4.3.21		K00276	AT2G42490	copper methylamine oxidase precursor, putative, expressed; Copper amine oxidase family protein	PTHR10638,PTHR10638:SF18
Gohir.A08G032200	-1.24670078111209	PF02548	KOG2949	2.1.2.11		K00606	AT2G46110	3-methyl-2-oxobutanoate hydroxymethyltransferase, putative, expressed; ketopantoate hydroxymethyltransferase 1	PTHR20881:SF7,PTHR20881
Gohir.A02G078902	-1.22890826727744	PF00464	KOG2467	2.1.2.1		K00600	AT5G26780	serine hydroxymethyltransferase, mitochondrial precursor, putative, expressed; serine hydroxymethyltransferase 2	PTHR11680:SF26,PTHR11680
Gohir.D05G041700	-1.22002183170459	PF02353					AT4G33110	Cyclopropane-fatty-acyl-phospholipid synthase, putative, expressed; S-adenosyl-L-methionine-dependent methyltransferases superfamily protein	PTHR43832
Gohir.D06G035800	-1.20100798160414	PF03141		2.1.1.157			AT1G78240	dehydration response related protein, putative, expressed; S-adenosyl-L-methionine-dependent methyltransferases superfamily protein	PTHR10108,PTHR10108:SF899
Gohir.A10G127700	-1.19992464916449	PF02219	KOG0564	1.5.1.20		K00297	AT2G44160	methylenetetrahydrofolate reductase, putative, expressed; methylenetetrahydrofolate reductase 2	PTHR21091:SF31,PTHR21091
Gohir.D11G269800	-1.19856623790858				SignalP-noTM		AT5G18150	expressed protein; Methyltransferase-related protein	PTHR34132:SF1,PTHR34132
Gohir.A05G193900	-1.19468955744976	PF03141				K16302	AT1G19430	methyltransferase, putative, expressed; S-adenosyl-L-methionine-dependent methyltransferases superfamily protein	PTHR10108,PTHR10108:SF733
Gohir.D12G243400	-1.19190998444397	PF08100,PF00891	KOG3178	2.1.1.68		K13066	AT1G33030	O-methyltransferase, putative, expressed; O-methyltransferase family protein	PTHR11746,PTHR11746:SF81
Gohir.A08G026300	-1.19049752960443	PF03737		4.1.1.3		K02553	AT5G56260	regulator of ribonuclease, putative, expressed; Ribonuclease E inhibitor RraA/Dimethylmenaquinone methyltransferase	PTHR33254:SF3,PTHR33254
Gohir.D03G108200	-1.18997468482144	PF04043		3.1.1.11	SignalP-noTM		AT5G62360	invertase/pectin methylesterase inhibitor family protein, putative, expressed; Plant invertase/pectin methylesterase inhibitor superfamily protein	PTHR31080:SF19,PTHR31080
Gohir.A09G206300	-1.17152152642201	PF02219	KOG0564	1.5.1.20		K00297	AT2G44160	methylenetetrahydrofolate reductase, putative, expressed; methylenetetrahydrofolate reductase 2	PTHR21091:SF31,PTHR21091
Gohir.A05G141700	-1.16917823167256	PF01095,PF04043		3.1.1.11		K01051	AT3G14310	pectinesterase, putative, expressed; pectin methylesterase 3	PTHR31707,PTHR31707:SF55
Gohir.A05G012300	-1.1671280915999	PF08241		2.1.1.163			AT2G41040	methyltransferase domain containing protein, putative, expressed; S-adenosyl-L-methionine-dependent methyltransferases superfamily protein	PTHR43591,PTHR43591:SF19
Gohir.D09G199900	-1.16432721388883	PF02219	KOG0564	1.5.1.20		K00297	AT2G44160	methylenetetrahydrofolate reductase, putative, expressed; methylenetetrahydrofolate reductase 2	PTHR21091,PTHR21091:SF31
Gohir.A13G164700	-1.15820580924897	PF00891		2.1.1.68			AT5G54160	O-methyltransferase, putative, expressed; O-methyltransferase 1	PTHR11746,PTHR11746:SF114
Gohir.D05G144000	-1.15029208256419	PF04043,PF01095		3.1.1.11		K01051	AT3G14310	pectinesterase, putative, expressed; pectin methylesterase 3	PTHR31707:SF55,PTHR31707
Gohir.D03G157900	-1.14656536504646	PF08669	KOG2929				AT4G12130	aminomethyltransferase, putative, expressed; Glycine cleavage T-protein family	PTHR22602
Gohir.A12G242300	-1.12893648749509	PF00891,PF08100	KOG3178	2.1.1.68		K13066	AT1G33030	O-methyltransferase, putative, expressed; O-methyltransferase family protein	PTHR11746:SF81,PTHR11746
Gohir.A03G093100	-1.12169545863502	PF08241,PF13489	KOG1269	2.1.1.103		K05929	AT3G18000	CPuORF25 - conserved peptide uORF-containing transcript, expressed; S-adenosyl-L-methionine-dependent methyltransferases superfamily protein	PTHR44307:SF1,PTHR44307
Gohir.A01G192400	-1.11854522453133	PF02915		1.14.13.81		K04035	AT3G56940	magnesium-protoporphyrin IX monomethyl ester cyclase,chloroplast precursor, putative, expressed; dicarboxylate diiron protein, putative (Crd1)	PTHR31053:SF2,PTHR31053
Gohir.A13G164650	-1.11509222043617	PF08100		2.1.1.68			AT5G54160	O-methyltransferase, putative, expressed; O-methyltransferase 1	PTHR11746,PTHR11746:SF114
Gohir.D05G257100	-1.10984888978263	PF08241,PF08498	KOG1269	2.1.1.143		K08242	AT1G20330	C-methyltransferase, putative, expressed; sterol methyltransferase 2	PTHR44742,PTHR44742:SF1
Gohir.D02G045800	-1.09977287081171	PF03141					AT1G04430	methyltransferase, putative, expressed; S-adenosyl-L-methionine-dependent methyltransferases superfamily protein	PTHR10108,PTHR10108:SF704
Gohir.A07G047000	-1.0959191311846	PF07109	KOG1270	2.1.1.11		K03428	AT4G25080	magnesium-protoporphyrin O-methyltransferase, putative, expressed; magnesium-protoporphyrin IX methyltransferase	PTHR43591:SF9,PTHR43591
Gohir.A05G015300	-1.09427905194464	PF01429					AT3G15790	methyl-CpG binding domain containing protein, putative, expressed; methyl-CPG-binding domain 11	PTHR33729,PTHR33729:SF4
Gohir.D01G054400	-1.09172059583877	PF08241					AT3G15530	S-adenosyl-L-methionine-dependent methyltransferases superfamily protein	PTHR45277
Gohir.A12G224300	-1.08672947581198	PF08540,PF01154	KOG1393	2.3.3.10		K01641	AT4G11820	hydroxymethylglutaryl-CoA synthase, putative, expressed; hydroxymethylglutaryl-CoA synthase / HMG-CoA synthase / 3-hydroxy-3-methylglutaryl coenzyme A synthase	PTHR43323,PTHR43323:SF7
Gohir.A11G306500	-1.07290106418194	PF00682	KOG2368	4.1.3.4		K01640	AT2G26800	hydroxymethylglutaryl-CoA lyase, putative, expressed; Aldolase superfamily protein	PTHR42738,PTHR42738:SF6
Gohir.D01G119500	-1.05838447331585	PF00368	KOG2480	1.1.1.34		K00021	AT1G76490	3-hydroxy-3-methylglutaryl-coenzyme A reductase, putative, expressed; hydroxy methylglutaryl CoA reductase 1	PTHR10572,PTHR10572:SF23
Gohir.D02G086400	-1.0554963288723	PF00464	KOG2467	2.1.2.1		K00600	AT5G26780	serine hydroxymethyltransferase, mitochondrial precursor, putative, expressed; serine hydroxymethyltransferase 2	PTHR11680,PTHR11680:SF26
Gohir.D02G203028	-1.05291005368891	PF02401		1.17.1.2		K03527	AT4G34350	4-hydroxy-3-methylbut-2-enyl diphosphate reductase, putative, expressed; 4-hydroxy-3-methylbut-2-enyl diphosphate reductase	PTHR31619:SF2,PTHR31619
Gohir.A06G149200	-1.04364785128083	PF01571,PF08669	KOG2770	2.1.2.10		K00605	AT1G11860	aminomethyltransferase, putative, expressed; Glycine cleavage T-protein family	PTHR43757,PTHR43757:SF2
Gohir.A08G225900	-1.04136495938637	PF00293	KOG0142	5.3.3.2		K01823	AT3G02780	hydrolase, NUDIX family, domain containing protein, expressed; isopentenyl pyrophosphate:dimethylallyl pyrophosphate isomerase 2	PTHR10885:SF4,PTHR10885
Gohir.D12G243250	-1.04116777687259	PF08100,PF00891	KOG3178	2.1.1.68			AT5G54160	O-methyltransferase, putative, expressed; O-methyltransferase 1	PTHR11746,PTHR11746:SF81
Gohir.D08G246300	-1.03949750208562	PF00293	KOG0142	5.3.3.2		K01823	AT3G02780	hydrolase, NUDIX family, domain containing protein, expressed; isopentenyl pyrophosphate:dimethylallyl pyrophosphate isomerase 2	PTHR10885,PTHR10885:SF4
Gohir.D08G236300	-1.03278892259314	PF08267,PF01717	KOG2263	2.1.1.14		K00549	AT5G17920	5-methyltetrahydropteroyltriglutamate--homocysteine methyltransferase, putative, expressed; Cobalamin-independent synthase family protein	PTHR30519:SF11,PTHR30519
Gohir.D05G233500	-1.02987726534326	PF00464	KOG2467	2.1.2.1		K00600	AT1G36370	serine hydroxymethyltransferase, mitochondrial precursor, putative, expressed; serine hydroxymethyltransferase 7	PTHR11680,PTHR11680:SF7
Gohir.D09G139200	-1.00332226019698	PF00585,PF00291	KOG1250	4.3.1.19		K01754	AT3G10050	threonine dehydratase biosynthetic, chloroplast precursor, putative, expressed; L-O-methylthreonine resistant 1	PTHR43714
Gohir.A08G077250	1.0044	PF04043,PF01095		3.1.1.11	SignalP-noTM		AT1G02810	pectinesterase, putative, expressed; Plant invertase/pectin methylesterase inhibitor superfamily	PTHR31707:SF33,PTHR31707
Gohir.D03G102300	1.01382	PF01135	KOG1661	2.1.1.77	SignalP-noTM		AT3G48330	protein-L-isoaspartate O-methyltransferase, putative, expressed; protein-l-isoaspartate methyltransferase 1	PTHR11579,PTHR11579:SF8
Gohir.D10G064800	1.02012	PF00590	KOG1527				AT5G40850	siroheme synthase, putative, expressed; urophorphyrin methylase 1	PTHR21091:SF158,PTHR21091
Gohir.A13G062400	1.02364	PF06325	KOG1499	2.1.1.125			AT3G20020	methyltransferase, putative, expressed; protein arginine methyltransferase 6	PTHR11006,PTHR11006:SF70
Gohir.D05G348100	1.06987	PF06325					AT5G53920	ribosomal protein L11 methyltransferase-related, putative, expressed; ribosomal protein L11 methyltransferase-related	PTHR43648
Gohir.D04G148100	1.07033	PF01379,PF03900	KOG2892	2.5.1.61		K01749	AT5G08280	porphobilinogen deaminase, chloroplast precursor, putative, expressed; hydroxymethylbilane synthase	PTHR11557:SF0,PTHR11557
Gohir.A04G062600	1.09731	PF00977	KOG3055	5.3.1.16		K01814	AT2G36230	1-5-phosphoribosyl-5-5-phosphoribosylaminomethylideneaminoimidazole-4-carboxamide isomerase, chloroplast precursor, putative, expressed; Aldolase-type TIM barrel family protein	PTHR43090
Gohir.A03G104400	1.11086	PF01564		2.5.1.16			AT2G31740	methyltransferase domain containing protein, expressed; S-adenosyl-L-methionine-dependent methyltransferases superfamily protein	PTHR12176,PTHR12176:SF34
Gohir.D10G068100	1.14371	PF12697	KOG1454	3.1.1.82			AT4G09900	esterase, putative, expressed; methyl esterase 12	PTHR10992,PTHR10992:SF785
Gohir.D12G019200	1.14922	PF04452		2.1.1.193		K09761	AT1G50000	differentiation protein, putative, expressed; methyltransferases	PTHR30027
Gohir.A04G035300	1.15099	PF06325					AT5G53920	ribosomal protein L11 methyltransferase-related, putative, expressed; ribosomal protein L11 methyltransferase-related	PTHR43648
Gohir.A07G044300	1.16795	PF00385,PF00145,PF01426		2.1.1.37		K00558	AT1G69770	expressed protein; chromomethylase 3	PTHR10629,PTHR10629:SF28
Gohir.A08G152000	1.1709	PF00385,PF01426,PF00145		2.1.1.37		K00558	AT4G19020	C-5 cytosine-specific DNA methylase, putative, expressed; chromomethylase 2	PTHR10629,PTHR10629:SF34
Gohir.A12G088350	1.18847	PF10294		2.1.1.60			AT1G73320	expressed protein; S-adenosyl-L-methionine-dependent methyltransferases superfamily protein	PTHR14614,PTHR14614:SF95
Gohir.D10G131700	1.19357	PF03291		2.1.1.56			AT3G52210	mRNA cap guanine-N7 methyltransferase 2, putative, expressed; S-adenosyl-L-methionine-dependent methyltransferases superfamily protein	PTHR12189,PTHR12189:SF3
Gohir.D01G174400	1.20622	PF00385,PF01426,PF00145		2.1.1.37		K00558	AT1G80740	expressed protein; chromomethylase 1	PTHR10629,PTHR10629:SF30
Gohir.D03G147600	1.24082	PF02786,PF02785,PF00289		6.4.1.2		K01961	AT5G35360	methylcrotonoyl-CoA carboxylase subunit alpha, mitochondrial precursor, putative, expressed; acetyl Co-enzyme a carboxylase biotin carboxylase subunit	PTHR42761:SF4,PTHR42761
Gohir.D02G062500	1.24661			2.1.1.37			AT3G17310	DNA methyltransferase protein, putative, expressed; S-adenosyl-L-methionine-dependent methyltransferases superfamily protein	PTHR23068,PTHR23068:SF11
Gohir.D05G030400	1.25225	PF13649		2.1.1.125		K11434	AT4G29510	methyltransferase, putative, expressed; arginine methyltransferase 11	PTHR11006,PTHR11006:SF53
Gohir.A12G018701	1.29768	PF04452		2.1.1.193		K09761	AT1G50000	differentiation protein, putative, expressed; methyltransferases	PTHR30027
Gohir.D06G081500	1.32073	PF04043,PF01095		3.1.1.11	SignalP-noTM	K01051	AT4G33220	pectinesterase, putative, expressed; pectin methylesterase 44	PTHR31707,PTHR31707:SF10
Gohir.A13G131500	1.33736	PF01189,PF17125	KOG1122	2.1.1.178			AT4G26600	NOL1/NOP2/sun family protein, putative, expressed; S-adenosyl-L-methionine-dependent methyltransferases superfamily protein	PTHR22807,PTHR22807:SF30
Gohir.D11G243100	1.33821	PF01717,PF08267		2.1.1.14		K00549	AT5G17920	5-methyltetrahydropteroyltriglutamate--homocysteine methyltransferase, putative, expressed; Cobalamin-independent synthase family protein	PTHR30519,PTHR30519:SF11
Gohir.D11G176600	1.39305	PF08704		2.1.1.220			AT5G14600	tRNA methyltransferase complex GCD14 subunit, putative, expressed; S-adenosyl-L-methionine-dependent methyltransferases superfamily protein	PTHR12133:SF2,PTHR12133
Gohir.D08G173000	1.40632	PF00385,PF01426,PF00145		2.1.1.37		K00558	AT4G19020	C-5 cytosine-specific DNA methylase, putative, expressed; chromomethylase 2	PTHR10629:SF34,PTHR10629
Gohir.D07G183400	1.42309	PF01619	KOG0186	1.5.5.2		K00318	AT5G38710	proline oxidase, mitochondrial precursor, putative, expressed; Methylenetetrahydrofolate reductase family protein	PTHR13914:SF0,PTHR13914
Gohir.D04G056000	1.43023	PF00145		2.1.1.37			AT5G14620	DNA methyltransferase protein, putative, expressed; domains rearranged methyltransferase 2	PTHR23068,PTHR23068:SF3
Gohir.A04G067614	1.44803	PF00585		4.3.1.19			AT3G10050	threonine dehydratase biosynthetic, chloroplast precursor, putative, expressed; L-O-methylthreonine resistant 1	PTHR43714
Gohir.A12G026600	1.47474	PF00561	KOG1454		SignalP-noTM		AT3G50440	OsPOP4 - Putative Prolyl Oligopeptidase homologue, expressed; methyl esterase 10	PTHR10992:SF1002,PTHR10992
Gohir.A10G082500	1.51288	PF04043,PF01095		3.1.1.11			AT5G09760	pectinesterase, putative, expressed; Plant invertase/pectin methylesterase inhibitor superfamily	PTHR31707:SF82,PTHR31707
Gohir.D04G099600	1.5229	PF00977	KOG3055	5.3.1.16		K01814	AT2G36230	1-5-phosphoribosyl-5-5-phosphoribosylaminomethylideneaminoimidazole-4-carboxamide isomerase, chloroplast precursor, putative, expressed; Aldolase-type TIM barrel family protein	PTHR43090
Gohir.A05G373000	1.58022	PF01426,PF12047,PF00145		2.1.1.37		K00558	AT5G49160	C-5 cytosine-specific DNA methylase, putative, expressed; methyltransferase 1	PTHR10629,PTHR10629:SF36
Gohir.D10G106500	1.58347	PF04043			SignalP-noTM		AT5G64620	invertase/pectin methylesterase inhibitor family protein, putative, expressed; cell wall / vacuolar inhibitor of fructosidase 2	PTHR31080:SF62,PTHR31080
Gohir.1Z049570	1.58455	PF08704,PF13639		6.3.2.19			AT5G14600	tRNA methyltransferase complex GCD14 subunit, putative, expressed; S-adenosyl-L-methionine-dependent methyltransferases superfamily protein	PTHR14155:SF153,PTHR14155
Gohir.A12G012400	1.58925	PF00368	KOG2480	1.1.1.34		K00021	AT1G76490	3-hydroxy-3-methylglutaryl-coenzyme A reductase, putative, expressed; hydroxy methylglutaryl CoA reductase 1	PTHR10572:SF22,PTHR10572
Gohir.D02G175300	1.60164	PF05033,PF00856,PF02182	KOG1082	2.1.1.43		K11420	AT5G13960	histone-lysine N-methyltransferase, putative, expressed; SU(VAR)3-9 homolog 4	PTHR22884:SF467,PTHR22884
Gohir.A01G084900	1.63367	PF03492		2.1.1.278		K18848	AT5G55250	jasmonate O-methyltransferase, putative, expressed; IAA carboxylmethyltransferase 1	PTHR31009,PTHR31009:SF5
Gohir.A07G044000	1.63433	PF10672		2.1.1.191			AT1G54310	RNA binding protein, putative, expressed; S-adenosyl-L-methionine-dependent methyltransferases superfamily protein	PTHR42873
Gohir.D07G017600	1.75189	PF01095,PF04043		3.1.1.11	SignalP-noTM	K01051	AT3G43270	pectinesterase, putative, expressed; Plant invertase/pectin methylesterase inhibitor superfamily	PTHR31707:SF10,PTHR31707
Gohir.D12G084701	1.80642			2.1.1.56			AT3G52210	mRNA cap guanine-N7 methyltransferase 2, putative, expressed; S-adenosyl-L-methionine-dependent methyltransferases superfamily protein	PTHR12189,PTHR12189:SF3
Gohir.A10G005900	1.83281	PF05891		2.1.1.244		K16219	AT5G44450	ad-003, putative, expressed; methyltransferases	PTHR12753,PTHR12753:SF0
Gohir.D12G086700	1.83565	PF10294	KOG2793	2.1.1.60			AT1G73320	expressed protein; S-adenosyl-L-methionine-dependent methyltransferases superfamily protein	PTHR14614,PTHR14614:SF95
Gohir.A03G152200	1.89861	PF00856,PF02182,PF05033	KOG1082	2.1.1.43		K11420	AT5G13960	histone-lysine N-methyltransferase, putative, expressed; SU(VAR)3-9 homolog 4	PTHR22884,PTHR22884:SF467
Gohir.D06G134001	1.90938	PF03291		2.1.1.56			AT3G52210	mRNA cap guanine-N7 methyltransferase 2, putative, expressed; S-adenosyl-L-methionine-dependent methyltransferases superfamily protein	PTHR12189,PTHR12189:SF3
Gohir.A10G063300	1.91235	PF00590	KOG1527				AT5G40850	siroheme synthase, putative, expressed; urophorphyrin methylase 1	PTHR21091:SF158,PTHR21091
Gohir.D07G016400	1.91735	PF04043		3.1.1.11	SignalP-noTM		AT5G20740	invertase/pectin methylesterase inhibitor family protein, putative, expressed; Plant invertase/pectin methylesterase inhibitor superfamily protein	PTHR31080:SF26,PTHR31080
Gohir.D07G058800	1.95919	PF01179,PF00153		1.4.3.21			AT2G42490	copper methylamine oxidase precursor, putative, expressed; Copper amine oxidase family protein	PTHR10638,PTHR10638:SF18
Gohir.1Z049410	2.03014	PF08704		2.1.1.220			AT5G14600	tRNA methyltransferase complex GCD14 subunit, putative, expressed; S-adenosyl-L-methionine-dependent methyltransferases superfamily protein	PTHR12133,PTHR12133:SF2
Gohir.A03G021200	2.07699	PF02785,PF02786,PF00289		6.4.1.2			AT5G35360	methylcrotonoyl-CoA carboxylase subunit alpha, mitochondrial precursor, putative, expressed; acetyl Co-enzyme a carboxylase biotin carboxylase subunit	PTHR42761,PTHR42761:SF4
Gohir.D06G083601	2.08032	PF17284,PF01564		2.5.1.79			AT5G19530	spermidine synthase, putative, expressed; S-adenosyl-L-methionine-dependent methyltransferases superfamily protein	PTHR43317,PTHR43317:SF2
Gohir.D07G028400	2.15895	PF08241	KOG3010	2.1.1.145			AT2G41380	methyltransferase, putative, expressed; S-adenosyl-L-methionine-dependent methyltransferases superfamily protein	PTHR45180
Gohir.A01G232100	2.23078	PF08704		2.1.1.220			AT5G14600	tRNA methyltransferase complex GCD14 subunit, putative, expressed; S-adenosyl-L-methionine-dependent methyltransferases superfamily protein	PTHR12133,PTHR12133:SF2
Gohir.A11G189100	2.24886	PF12697	KOG1454				AT2G23620	OsPOP4 - Putative Prolyl Oligopeptidase homologue, expressed; methyl esterase 1	PTHR10992,PTHR10992:SF820
Gohir.D06G003900	2.26338	PF03492		2.1.1.141		K08241	AT1G19640	SAM dependent carboxyl methyltransferase, putative, expressed; jasmonic acid carboxyl methyltransferase	PTHR31009,PTHR31009:SF12
Gohir.A07G016600	2.35502	PF04043		3.1.1.11	SignalP-noTM		AT5G20740	invertase/pectin methylesterase inhibitor family protein, putative, expressed; Plant invertase/pectin methylesterase inhibitor superfamily protein	PTHR31080:SF26,PTHR31080
Gohir.D07G059500	2.39795	PF01135	KOG1661	2.1.1.77		K00573	AT3G48330	protein-L-isoaspartate O-methyltransferase, putative, expressed; protein-l-isoaspartate methyltransferase 1	PTHR11579:SF8,PTHR11579
Gohir.A06G082700	2.4193	PF01564,PF17284	KOG1562	2.5.1.79		K18787	AT5G19530	spermidine synthase, putative, expressed; S-adenosyl-L-methionine-dependent methyltransferases superfamily protein	PTHR43317:SF2,PTHR43317
Gohir.D11G061400	2.48678	PF08241	KOG3010	2.1.1.145			AT5G10830	methyltransferase, putative, expressed; S-adenosyl-L-methionine-dependent methyltransferases superfamily protein	PTHR44575,PTHR44575:SF2
Gohir.A05G358100	2.51727	PF00145		2.1.1.37			AT5G14620	DNA methyltransferase protein, putative, expressed; domains rearranged methyltransferase 2	PTHR23068:SF3,PTHR23068
Gohir.A11G057350	2.65556	PF08241		2.1.1.145			AT5G10830	methyltransferase, putative, expressed; S-adenosyl-L-methionine-dependent methyltransferases superfamily protein	PTHR44575,PTHR44575:SF2
Gohir.A12G213300	2.7216	PF05033,PF00856,PF02182	KOG1082	2.1.1.43		K11420	AT2G22740	histone-lysine N-methyltransferase, putative, expressed; SU(VAR)3-9 homolog 6	PTHR22884,PTHR22884:SF458
Gohir.A06G084600	2.73301	PF01095,PF04043		3.1.1.11	SignalP-noTM	K01051	AT4G33220	pectinesterase, putative, expressed; pectin methylesterase 44	PTHR31707:SF10,PTHR31707
Gohir.A01G123000	2.76404	PF10237					AT3G58470	N2, N2-dimethylguanosine tRNA methyltransferase, putative, expressed; nucleic acid binding;methyltransferases	PTHR13200,PTHR13200:SF0
Gohir.D11G259301	2.76404	PF10237					AT3G58470	N2, N2-dimethylguanosine tRNA methyltransferase, putative, expressed; nucleic acid binding;methyltransferases	PTHR13200,PTHR13200:SF0
Gohir.A11G291900	2.89185	PF04043			SignalP-noTM		AT4G00872	Plant invertase/pectin methylesterase inhibitor superfamily protein	PTHR31080:SF6,PTHR31080
Gohir.D13G217900	2.96919	PF03492					AT5G66430	SAM dependent carboxyl methyltransferase, putative, expressed; S-adenosyl-L-methionine-dependent methyltransferases superfamily protein	PTHR31009:SF19,PTHR31009
Gohir.A01G178300	3.0106	PF02182					AT5G47160	histone-lysine N-methyltransferase, H3 lysine-9 specific SUVH1, putative, expressed; YDG/SRA domain-containing protein	PTHR22884:SF476,PTHR22884
Gohir.D03G169433	3.11139	PF04043			SignalP-noTM		AT5G46970	invertase/pectin methylesterase inhibitor family protein, putative, expressed; Plant invertase/pectin methylesterase inhibitor superfamily protein	PTHR31707:SF65,PTHR31707
Gohir.A07G017800	3.59909	PF01095,PF04043		3.1.1.11	SignalP-noTM	K01051	AT3G43270	pectinesterase, putative, expressed; Plant invertase/pectin methylesterase inhibitor superfamily	PTHR31707:SF10,PTHR31707
Gohir.D11G061200	4.17066	PF03141					AT5G64030	methyltransferase, putative, expressed; S-adenosyl-L-methionine-dependent methyltransferases superfamily protein	PTHR10108:SF1060,PTHR10108
Gohir.D03G023232	10.0007	PF10237					AT3G58470	N2, N2-dimethylguanosine tRNA methyltransferase, putative, expressed; nucleic acid binding;methyltransferases	PTHR13200,PTHR13200:SF0
